# Supplementary material for: Proteome-Wide Analysis of Trypanosoma cruzi Exponential and Stationary Growth Phases Reveals a Subcellular Compartment-Specific Regulation
Source: Genes (Basel). 2018 Aug 15;9(8):413. doi: 10.3390/genes9080413 (PMC6115888; doi:10.3390/genes9080413)
Supplement: Supplementary file 1 [file genes-09-00413-s001.zip]

Archive with 8 entries (8 files):
- Supplementary information.pdf
- Supplementary Table 1.xlsx
- Supplementary Table 2.xlsx
- Supplementary Table 3.xlsx
- Supplementary Table 4.xlsx
- Supplementary Table 5.xlsx
- Supplementary Table 6.xlsx
- Supplementary Table 7.xlsx
