# Supplementary material for: Proteome-Wide Analysis of Trypanosoma cruzi Exponential and Stationary Growth Phases Reveals a Subcellular Compartment-Specific Regulation
Source: Genes (Basel). 2018 Aug 15;9(8):413. doi: 10.3390/genes9080413 (PMC6115888; doi:10.3390/genes9080413)
Supplement: Supplementary file 1 [file genes-09-00413-s001.zip › Supplementary Table 1.xlsx]

## Sheet: Foglio1
Supplementary Table 1: Total proteins identified and quantified
Protein IDs	Majority protein IDs	Peptide counts (all)	Peptide counts (razor+unique)	Peptide counts (unique)	Fasta headers	Number of proteins	Peptides	Razor + unique peptides	Unique peptides	Sum peptides	Peptides sample stationary 1	Peptides sample stationary 2	Peptides sample exponential 1	Peptides sample exponential 2	Razor + unique peptides stationary 1	Razor + unique peptides stationary 2	Razor + unique peptides exponential 1	Razor + unique peptides exponential 2	Unique peptides stationary 1	Unique peptides stationary 2	Unique peptides exponential 1	Unique peptides exponential 2	Sequence coverage [%]	Unique + razor sequence coverage [%]	Unique sequence coverage [%]	Mol. weight [kDa]	Sequence length	Sequence lengths	Fraction average	Fraction 1	Q-value	Score	Identification type stationary 1	Identification type stationary 2	Identification type sample44	Identification type sample45	Identification type exponential 1	Identification type exponential 2	Sequence coverage stationary 1 [%]	Sequence coverage stationary 2 [%]	Sequence coverage sample44 [%]	Sequence coverage sample45 [%]	Sequence coverage exponential 1 [%]	Sequence coverage exponential 2 [%]	Intensity	Intensity stationary 1	Intensity stationary 2	Intensity exponential 1	Intensity exponential 2
tr|Q4D6J0|Q4D6J0_TRYCC;tr|Q4CS86|Q4CS86_TRYCC	tr|Q4D6J0|Q4D6J0_TRYCC	81;2	81;2	26;0	>tr|Q4D6J0|Q4D6J0_TRYCC Calpain-like cysteine peptidase, putative OS=Trypanosoma cruzi (strain CL Brener) GN=Tc00.1047053506721.30 PE=3 SV=1	2	81	81	26	271	64	66	71	70	64	66	71	70	22	21	23	22	27.6	27.6	9	519.34	4571	4571;161	1	841	0	323.31	By MS/MS	By MS/MS	By MS/MS	By MS/MS	By MS/MS	By MS/MS	21.9	22	20.9	21.2	25	24	41052000000	8025500000	10636000000	5184200000	8880000000
tr|Q4CX46|Q4CX46_TRYCC;tr|Q4CL73|Q4CL73_TRYCC	tr|Q4CX46|Q4CX46_TRYCC	63;1	63;1	63;1	>tr|Q4CX46|Q4CX46_TRYCC Dynein heavy chain, putative (Fragment) OS=Trypanosoma cruzi (strain CL Brener) GN=Tc00.1047053509585.10 PE=4 SV=1	2	63	63	63	186	41	43	50	52	41	43	50	52	41	43	50	52	21.2	21.2	21.2	423.95	3706	3706;578	1	551	0	266.43	By MS/MS	By MS/MS	By MS/MS	By MS/MS	By MS/MS	By MS/MS	13.7	14.4	14.4	12.8	17.3	18.1	20233000000	3206700000	4949700000	2696300000	4703700000
tr|Q4DBM7|Q4DBM7_TRYCC;tr|Q4CQS6|Q4CQS6_TRYCC;tr|Q4DKH8|Q4DKH8_TRYCC;tr|Q4DBM6|Q4DBM6_TRYCC;tr|Q4CQS5|Q4CQS5_TRYCC	tr|Q4DBM7|Q4DBM7_TRYCC;tr|Q4CQS6|Q4CQS6_TRYCC;tr|Q4DKH8|Q4DKH8_TRYCC	46;45;40;18;2	46;45;40;18;2	46;45;40;18;2	>tr|Q4DBM7|Q4DBM7_TRYCC Heat shock protein 85, putative OS=Trypanosoma cruzi (strain CL Brener) GN=Tc00.1047053509105.140 PE=3 SV=1;>tr|Q4CQS6|Q4CQS6_TRYCC Heat shock protein 85, putative OS=Trypanosoma cruzi (strain CL Brener) GN=Tc00.1047053507713.30 PE=	5	46	46	46	152	34	32	42	44	34	32	42	44	34	32	42	44	62.6	62.6	62.6	80741	704	704;704;550;300;54	1	817	0	323.31	By MS/MS	By MS/MS	By MS/MS	By MS/MS	By MS/MS	By MS/MS	45.9	36.4	39.2	38.5	59.1	60.4	260440000000	39819000000	57652000000	46959000000	75200000000
tr|Q4D620|Q4D620_TRYCC	tr|Q4D620|Q4D620_TRYCC	44	44	32	>tr|Q4D620|Q4D620_TRYCC Glucose-regulated protein 78, putative OS=Trypanosoma cruzi (strain CL Brener) GN=Tc00.1047053506585.40 PE=3 SV=1	1	44	44	32	149	34	33	39	43	34	33	39	43	25	24	29	31	67.7	67.7	51.8	71315	651	651	1	642	0	323.31	By MS/MS	By MS/MS	By MS/MS	By MS/MS	By MS/MS	By MS/MS	53.1	49.8	48.1	51.3	64.4	67.7	88536000000	13646000000	16544000000	14174000000	25968000000
tr|Q4E3P5|Q4E3P5_TRYCC	tr|Q4E3P5|Q4E3P5_TRYCC	42	42	2	>tr|Q4E3P5|Q4E3P5_TRYCC Pyruvate, phosphate dikinase OS=Trypanosoma cruzi (strain CL Brener) GN=Tc00.1047053510101.140 PE=3 SV=1	1	42	42	2	144	34	32	39	39	34	32	39	39	2	2	2	2	54	54	3.1	100.85	913	913	1	701	0	323.31	By MS/MS	By MS/MS	By MS/MS	By MS/MS	By MS/MS	By MS/MS	47.1	40.7	36.9	38.1	50.6	51.2	195190000000	35152000000	56202000000	25808000000	47970000000
tr|Q4E0Q0|Q4E0Q0_TRYCC	tr|Q4E0Q0|Q4E0Q0_TRYCC	42	2	2	>tr|Q4E0Q0|Q4E0Q0_TRYCC Pyruvate, phosphate dikinase OS=Trypanosoma cruzi (strain CL Brener) GN=Tc00.1047053506297.190 PE=3 SV=1	1	42	2	2	144	34	32	39	39	2	2	2	2	2	2	2	2	54	3.1	3.1	100.83	913	913	1	26	0	40757	By MS/MS	By MS/MS	By MS/MS	By MS/MS	By MS/MS	By MS/MS	47.1	40.7	36.9	38.1	50.6	51.2	4005000000	816060000	1195700000	483040000	997950000
tr|Q4CVR9|Q4CVR9_TRYCC;tr|Q4CVL7|Q4CVL7_TRYCC;tr|Q4CPR7|Q4CPR7_TRYCC;tr|Q4CL09|Q4CL09_TRYCC;tr|Q4DMV2|Q4DMV2_TRYCC	tr|Q4CVR9|Q4CVR9_TRYCC	38;18;15;12;2	38;18;15;12;2	27;7;4;12;2	>tr|Q4CVR9|Q4CVR9_TRYCC Heat shock 70 kDa protein, mitochondrial, putative OS=Trypanosoma cruzi (strain CL Brener) GN=Tc00.1047053507029.30 PE=3 SV=1	5	38	38	27	140	34	33	36	37	34	33	36	37	23	23	25	26	56.6	56.6	46.6	70989	655	655;284;205;188;74	1	848	0	323.31	By MS/MS	By MS/MS	By MS/MS	By MS/MS	By MS/MS	By MS/MS	52.2	53.4	53.4	52.2	55.1	56.5	169860000000	27079000000	33146000000	24264000000	49391000000
tr|Q4D5X0|Q4D5X0_TRYCC;tr|Q4D3T1|Q4D3T1_TRYCC;tr|Q4DBS3|Q4DBS3_TRYCC;tr|Q4CNX4|Q4CNX4_TRYCC;tr|Q4D5X1|Q4D5X1_TRYCC	tr|Q4D5X0|Q4D5X0_TRYCC;tr|Q4D3T1|Q4D3T1_TRYCC	37;37;8;6;6	37;37;8;6;6	37;37;8;6;6	>tr|Q4D5X0|Q4D5X0_TRYCC Elongation factor 2, putative OS=Trypanosoma cruzi (strain CL Brener) GN=Tc00.1047053508169.20 PE=4 SV=1;>tr|Q4D3T1|Q4D3T1_TRYCC Elongation factor 2, putative OS=Trypanosoma cruzi (strain CL Brener) GN=Tc00.1047053510963.90 PE=4 SV=	5	37	37	37	140	34	32	37	37	34	32	37	37	34	32	37	37	55.8	55.8	55.8	94189	846	846;846;154;173;204	1	1060	0	323.31	By MS/MS	By MS/MS	By MS/MS	By MS/MS	By MS/MS	By MS/MS	48.3	48.1	44.6	43.5	55.8	55.8	203490000000	29095000000	38544000000	36938000000	66986000000
tr|Q4E5Z1|Q4E5Z1_TRYCC	tr|Q4E5Z1|Q4E5Z1_TRYCC	43	43	19	>tr|Q4E5Z1|Q4E5Z1_TRYCC Uncharacterized protein OS=Trypanosoma cruzi (strain CL Brener) GN=Tc00.1047053508153.1050 PE=4 SV=1	1	43	43	19	140	29	31	41	39	29	31	41	39	12	12	18	17	26.2	26.2	10.3	246.43	2174	2174	1	413	0	323.31	By MS/MS	By MS/MS	By MS/MS	By MS/MS	By MS/MS	By MS/MS	17.7	18.6	15.5	13.8	25.8	23.7	22818000000	3138400000	4321000000	4167100000	7186700000
tr|Q4D609|Q4D609_TRYCC	tr|Q4D609|Q4D609_TRYCC	37	37	4	>tr|Q4D609|Q4D609_TRYCC Cytoskeleton-associated protein CAP5.5, putative OS=Trypanosoma cruzi (strain CL Brener) GN=Tc00.1047053508555.60 PE=3 SV=1	1	37	37	4	131	34	33	31	33	34	33	31	33	3	3	2	4	61	61	7.4	89807	806	806	1	466	0	323.31	By MS/MS	By MS/MS	By MS/MS	By MS/MS	By MS/MS	By MS/MS	56.3	51.6	49.5	53.7	51.4	54.3	37691000000	6856200000	9599900000	4812900000	7821500000
tr|Q4DWB5|Q4DWB5_TRYCC	tr|Q4DWB5|Q4DWB5_TRYCC	38	38	38	>tr|Q4DWB5|Q4DWB5_TRYCC Transitional endoplasmic reticulum ATPase, putative OS=Trypanosoma cruzi (strain CL Brener) GN=Tc00.1047053509733.170 PE=4 SV=1	1	38	38	38	128	30	32	34	32	30	32	34	32	30	32	34	32	52.7	52.7	52.7	86109	778	778	1	492	0	323.31	By MS/MS	By MS/MS	By MS/MS	By MS/MS	By MS/MS	By MS/MS	44.1	45	42.4	44.6	49.2	48.2	59058000000	9439100000	13534000000	9423200000	12988000000
tr|Q4DTM8|Q4DTM8_TRYCC	tr|Q4DTM8|Q4DTM8_TRYCC	35	35	0	>tr|Q4DTM8|Q4DTM8_TRYCC Heat shock protein 70 (HSP70), putative OS=Trypanosoma cruzi (strain CL Brener) GN=Tc00.1047053511211.170 PE=3 SV=1	1	35	35	0	127	32	30	32	33	32	30	32	33	0	0	0	0	49.5	49.5	0	73297	677	677	1	840	0	323.31	By MS/MS	By MS/MS	By MS/MS	By MS/MS	By MS/MS	By MS/MS	42.5	38.8	35.7	46.1	43.4	44.8	350360000000	51721000000	66469000000	61469000000	93932000000
tr|Q4DJS7|Q4DJS7_TRYCC	tr|Q4DJS7|Q4DJS7_TRYCC	35	12	11	>tr|Q4DJS7|Q4DJS7_TRYCC Cytoskeleton-associated protein CAP5.5, putative OS=Trypanosoma cruzi (strain CL Brener) GN=Tc00.1047053509237.130 PE=3 SV=1	1	35	12	11	126	33	32	30	31	11	11	11	11	10	10	10	10	59.5	25.2	23	88666	797	797	1	175	0	199.5	By MS/MS	By MS/MS	By MS/MS	By MS/MS	By MS/MS	By MS/MS	57.1	55.1	50.9	55.7	53.5	55.5	9586700000	1776900000	2188100000	1587000000	1896500000
tr|Q4DTM9|Q4DTM9_TRYCC	tr|Q4DTM9|Q4DTM9_TRYCC	34	3	2	>tr|Q4DTM9|Q4DTM9_TRYCC Heat shock protein 70 (HSP70), putative OS=Trypanosoma cruzi (strain CL Brener) GN=Tc00.1047053511211.160 PE=3 SV=1	1	34	3	2	123	31	29	31	32	3	3	3	3	2	2	2	2	51.1	3.4	1.7	70.93	654	654	1	71	0	18573	By MS/MS	By MS/MS	By MS/MS	By MS/MS	By MS/MS	By MS/MS	43.9	40.1	36.9	47.6	44.8	46.2	28923000000	4581400000	5587400000	4292900000	7821300000
tr|Q4CP00|Q4CP00_TRYCC	tr|Q4CP00|Q4CP00_TRYCC	34	1	1	>tr|Q4CP00|Q4CP00_TRYCC Cytoskeleton-associated protein CAP5.5, putative (Fragment) OS=Trypanosoma cruzi (strain CL Brener) GN=Tc00.1047053511333.4 PE=3 SV=1	1	34	1	1	123	32	31	30	30	1	1	1	1	1	1	1	1	61.8	2.3	2.3	80.78	728	728	1	11	0	39079	By MS/MS	By MS/MS	By MS/MS	By MS/MS	By MS/MS	By MS/MS	59.2	54	51.6	53.7	56.2	54.4	365640000	76801000	77134000	25446000	73193000
tr|Q4CSI2|Q4CSI2_TRYCC	tr|Q4CSI2|Q4CSI2_TRYCC	33	33	13	>tr|Q4CSI2|Q4CSI2_TRYCC Uncharacterized protein OS=Trypanosoma cruzi (strain CL Brener) GN=Tc00.1047053506441.20 PE=4 SV=1	1	33	33	13	112	27	27	29	29	27	27	29	29	10	11	11	11	40.3	40.3	14.8	123.46	1082	1082	1	504	0	323.31	By MS/MS	By MS/MS	By MS/MS	By MS/MS	By MS/MS	By MS/MS	30.7	31.8	25.1	28.8	36.4	37.4	44501000000	6850700000	9655300000	7150200000	11720000000
tr|Q4D9S6|Q4D9S6_TRYCC;tr|Q4D7U3|Q4D7U3_TRYCC	tr|Q4D9S6|Q4D9S6_TRYCC	31;4	31;4	31;4	>tr|Q4D9S6|Q4D9S6_TRYCC Urocanate hydratase, putative OS=Trypanosoma cruzi (strain CL Brener) GN=Tc00.1047053504045.110 PE=3 SV=1	2	31	31	31	110	27	24	29	30	27	24	29	30	27	24	29	30	56.1	56.1	56.1	74769	675	675;50	1	439	0	323.31	By MS/MS	By MS/MS	By MS/MS	By MS/MS	By MS/MS	By MS/MS	47.4	39.9	43	45.9	52	53.5	35703000000	5219600000	6699800000	5860900000	10306000000
tr|Q4CVA3|Q4CVA3_TRYCC	tr|Q4CVA3|Q4CVA3_TRYCC	31	31	12	>tr|Q4CVA3|Q4CVA3_TRYCC Thimet oligopeptidase, putative OS=Trypanosoma cruzi (strain CL Brener) GN=Tc00.1047053506411.10 PE=3 SV=1	1	31	31	12	110	25	25	29	31	25	25	29	31	11	8	12	12	48.5	48.5	23	77529	686	686	1	415	0	212.6	By MS/MS	By MS/MS	By MS/MS	By MS/MS	By MS/MS	By MS/MS	38.3	36.6	38.5	35.1	46.1	48.5	22501000000	3208100000	4464500000	4314000000	7110900000
tr|Q4DI67|Q4DI67_TRYCC	tr|Q4DI67|Q4DI67_TRYCC	35	35	14	>tr|Q4DI67|Q4DI67_TRYCC Heat shock protein, putative OS=Trypanosoma cruzi (strain CL Brener) GN=Tc00.1047053507831.60 PE=3 SV=1	1	35	35	14	110	23	25	29	33	23	25	29	33	9	10	13	13	44	44	20.1	93525	832	832	1	323	0	188.36	By MS/MS	By MS/MS	By MS/MS	By MS/MS	By MS/MS	By MS/MS	31.5	28.4	28.5	25.4	40.5	42.5	25047000000	3362100000	4885400000	4737800000	7780000000
tr|Q4D9T0|Q4D9T0_TRYCC	tr|Q4D9T0|Q4D9T0_TRYCC	31	31	30	>tr|Q4D9T0|Q4D9T0_TRYCC Thermostable carboxypeptidase 1, putative OS=Trypanosoma cruzi (strain CL Brener) GN=Tc00.1047053504045.60 PE=4 SV=1	1	31	31	30	106	26	28	26	26	26	28	26	26	25	27	25	25	58.4	58.4	57.1	58274	503	503	1	500	0	323.31	By MS/MS	By MS/MS	By MS/MS	By MS/MS	By MS/MS	By MS/MS	49.7	53.3	53.5	54.7	48.9	48.9	51712000000	7818700000	11456000000	7042300000	11674000000
tr|Q4E246|Q4E246_TRYCC;tr|Q4CLF0|Q4CLF0_TRYCC	tr|Q4E246|Q4E246_TRYCC	29;5	29;5	20;5	>tr|Q4E246|Q4E246_TRYCC Uncharacterized protein OS=Trypanosoma cruzi (strain CL Brener) GN=Tc00.1047053508707.310 PE=4 SV=1	2	29	29	20	105	24	23	29	29	24	23	29	29	16	15	20	20	40.7	40.7	31.1	101.85	914	914;265	1	395	0	323.31	By MS/MS	By MS/MS	By MS/MS	By MS/MS	By MS/MS	By MS/MS	31.3	30	30.5	29.3	40.7	40.7	43595000000	7869600000	8597500000	6991900000	11873000000
tr|Q4CPQ6|Q4CPQ6_TRYCC	tr|Q4CPQ6|Q4CPQ6_TRYCC	34	29	21	>tr|Q4CPQ6|Q4CPQ6_TRYCC Calpain cysteine peptidase, putative (Fragment) OS=Trypanosoma cruzi (strain CL Brener) GN=Tc00.1047053505985.9 PE=4 SV=1	1	34	29	21	105	26	27	25	27	21	22	21	22	13	15	14	15	38.6	34	18.4	200.8	1753	1753	1	362	0	253.22	By MS/MS	By MS/MS	By MS/MS	By MS/MS	By MS/MS	By MS/MS	32.4	33.8	33.9	36.7	31.8	32	55825000000	10233000000	11336000000	7438100000	12946000000
tr|Q4CNG5|Q4CNG5_TRYCC	tr|Q4CNG5|Q4CNG5_TRYCC	30	13	13	>tr|Q4CNG5|Q4CNG5_TRYCC Calpain-like cysteine peptidase, putative (Fragment) OS=Trypanosoma cruzi (strain CL Brener) GN=Tc00.1047053510801.10 PE=4 SV=1	1	30	13	13	99	24	25	26	24	9	8	9	11	9	8	9	11	32.2	15.3	15.3	156.22	1382	1382	1	87	0	73095	By MS/MS	By MS/MS	By MS/MS	By MS/MS	By MS/MS	By MS/MS	24.6	25.5	22.7	21.1	27.9	28.4	2673700000	623260000	641440000	432190000	598420000
tr|Q4D6H3|Q4D6H3_TRYCC;tr|Q4DBX7|Q4DBX7_TRYCC	tr|Q4D6H3|Q4D6H3_TRYCC	34;2	34;2	34;2	>tr|Q4D6H3|Q4D6H3_TRYCC Uncharacterized protein OS=Trypanosoma cruzi (strain CL Brener) GN=Tc00.1047053509247.30 PE=4 SV=1	2	34	34	34	98	17	20	30	31	17	20	30	31	17	20	30	31	20.1	20.1	20.1	263.18	2329	2329;304	1	250	0	183.69	By MS/MS	By MS/MS	By MS/MS	By MS/MS	By MS/MS	By MS/MS	9.3	11	7.6	9.5	17.1	18.2	8033000000	1044600000	1467100000	1717200000	2798300000
tr|Q4DYP5|Q4DYP5_TRYCC;tr|Q4DYP6|Q4DYP6_TRYCC;tr|Q4DYP4|Q4DYP4_TRYCC;tr|Q4E496|Q4E496_TRYCC	tr|Q4DYP5|Q4DYP5_TRYCC;tr|Q4DYP6|Q4DYP6_TRYCC;tr|Q4DYP4|Q4DYP4_TRYCC	29;26;16;11	29;26;16;11	29;26;16;11	>tr|Q4DYP5|Q4DYP5_TRYCC Chaperonin HSP60, mitochondrial OS=Trypanosoma cruzi (strain CL Brener) GN=Tc00.1047053507641.290 PE=3 SV=1;>tr|Q4DYP6|Q4DYP6_TRYCC Chaperonin HSP60, mitochondrial OS=Trypanosoma cruzi (strain CL Brener) GN=Tc00.1047053507641.280 PE	4	29	29	29	96	21	19	28	28	21	19	28	28	21	19	28	28	57.8	57.8	57.8	59165	559	559;560;261;286	1	1054	0	323.31	By MS/MS	By MS/MS	By MS/MS	By MS/MS	By MS/MS	By MS/MS	46.2	42	41.3	44	57.6	57.8	143970000000	18438000000	24281000000	29634000000	56280000000
tr|Q4CYL3|Q4CYL3_TRYCC	tr|Q4CYL3|Q4CYL3_TRYCC	30	30	7	>tr|Q4CYL3|Q4CYL3_TRYCC Uncharacterized protein OS=Trypanosoma cruzi (strain CL Brener) GN=Tc00.1047053504423.30 PE=4 SV=1	1	30	30	7	96	23	23	25	25	23	23	25	25	6	6	6	7	42.1	42.1	16.1	93722	821	821	1	371	0	323.31	By MS/MS	By MS/MS	By MS/MS	By MS/MS	By MS/MS	By MS/MS	34	34.1	34.2	32.8	37.8	35.3	33770000000	5744400000	8537700000	4078800000	7283600000
tr|Q4D147|Q4D147_TRYCC;tr|Q4D6R8|Q4D6R8_TRYCC;tr|Q4E104|Q4E104_TRYCC;tr|Q4DT27|Q4DT27_TRYCC;tr|Q4DFH0|Q4DFH0_TRYCC	tr|Q4D147|Q4D147_TRYCC	30;1;1;1;1	30;1;1;1;1	22;0;0;0;0	>tr|Q4D147|Q4D147_TRYCC Retrotransposon hot spot (RHS) protein, putative OS=Trypanosoma cruzi (strain CL Brener) GN=Tc00.1047053507015.10 PE=4 SV=1	5	30	30	22	95	20	22	28	25	20	22	28	25	14	17	20	18	38.3	38.3	29.3	114.49	995	995;249;557;557;930	1	287	0	318.07	By MS/MS	By MS/MS	By MS/MS	By MS/MS	By MS/MS	By MS/MS	25.8	28.1	14.8	20.3	37.5	35.2	14922000000	2159600000	2849200000	3406700000	4403800000
tr|Q4DKI7|Q4DKI7_TRYCC	tr|Q4DKI7|Q4DKI7_TRYCC	25	25	12	>tr|Q4DKI7|Q4DKI7_TRYCC Thiol-dependent reductase 1, putative OS=Trypanosoma cruzi (strain CL Brener) GN=Tc00.1047053509105.70 PE=4 SV=1	1	25	25	12	94	23	23	25	23	23	23	25	23	12	12	12	11	65.4	65.4	41.6	50688	445	445	1	646	0	323.31	By MS/MS	By MS/MS	By MS/MS	By MS/MS	By MS/MS	By MS/MS	62.9	62.9	65.4	60	65.4	62.9	196910000000	35356000000	47134000000	22946000000	41693000000
tr|Q4CTR0|Q4CTR0_TRYCC	tr|Q4CTR0|Q4CTR0_TRYCC	29	29	24	>tr|Q4CTR0|Q4CTR0_TRYCC Leucyl-tRNA synthetase, putative OS=Trypanosoma cruzi (strain CL Brener) GN=Tc00.1047053511049.40 PE=3 SV=1	1	29	29	24	93	20	20	27	26	20	20	27	26	15	15	22	21	39.9	39.9	34.9	121.81	1076	1076	1	275	0	253.06	By MS/MS	By MS/MS	By MS/MS	By MS/MS	By MS/MS	By MS/MS	26.3	26.6	23.4	24.6	37.5	35.2	14731000000	2261000000	3140100000	2605300000	4276900000
tr|Q4D634|Q4D634_TRYCC	tr|Q4D634|Q4D634_TRYCC	26	26	26	>tr|Q4D634|Q4D634_TRYCC Paraflagellar rod protein 3, putative OS=Trypanosoma cruzi (strain CL Brener) GN=Tc00.1047053509617.20 PE=4 SV=1	1	26	26	26	91	20	23	24	24	20	23	24	24	20	23	24	24	46	46	46	68662	589	589	1	330	0	272.38	By MS/MS	By MS/MS	By MS/MS	By MS/MS	By MS/MS	By MS/MS	35.3	41.1	30.4	35.1	44.3	43.3	25166000000	4182400000	5937600000	3732700000	4554300000
tr|Q4E2Q2|Q4E2Q2_TRYCC	tr|Q4E2Q2|Q4E2Q2_TRYCC	28	28	20	>tr|Q4E2Q2|Q4E2Q2_TRYCC Heat shock protein, putative OS=Trypanosoma cruzi (strain CL Brener) GN=Tc00.1047053504153.310 PE=3 SV=1	1	28	28	20	91	16	21	26	28	16	21	26	28	12	16	19	20	48	48	36.8	83.91	750	750	1	312	0	323.31	By MS/MS	By MS/MS	By MS/MS	By MS/MS	By MS/MS	By MS/MS	29.3	36.3	33.5	31.9	45.5	48	27996000000	3969300000	5397100000	5418900000	8786900000
tr|Q4CWA5|Q4CWA5_TRYCC;tr|Q4CRC5|Q4CRC5_TRYCC	tr|Q4CWA5|Q4CWA5_TRYCC;tr|Q4CRC5|Q4CRC5_TRYCC	25;16	25;16	25;16	>tr|Q4CWA5|Q4CWA5_TRYCC Arginine kinase, putative OS=Trypanosoma cruzi (strain CL Brener) GN=Tc00.1047053507241.30 PE=3 SV=1;>tr|Q4CRC5|Q4CRC5_TRYCC Arginine kinase (Fragment) OS=Trypanosoma cruzi (strain CL Brener) GN=Tc00.1047053482369.29 PE=3 SV=1	2	25	25	25	90	21	21	24	24	21	21	24	24	21	21	24	24	59.1	59.1	59.1	40197	357	357;237	1	398	0	283.55	By MS/MS	By MS/MS	By MS/MS	By MS/MS	By MS/MS	By MS/MS	47.9	51	47.9	42.6	59.1	59.1	90174000000	15058000000	21943000000	10621000000	21693000000
tr|Q4CTC8|Q4CTC8_TRYCC	tr|Q4CTC8|Q4CTC8_TRYCC	29	6	6	>tr|Q4CTC8|Q4CTC8_TRYCC Uncharacterized protein OS=Trypanosoma cruzi (strain CL Brener) GN=Tc00.1047053507569.10 PE=4 SV=1	1	29	6	6	89	21	22	24	22	4	5	5	4	4	5	5	4	40.5	14.3	14.3	93092	818	818	1	81	0	73041	By MS/MS	By MS/MS	By MS/MS	By MS/MS	By MS/MS	By MS/MS	29.1	32.4	32.5	31.1	36.1	29.5	2597400000	559540000	496370000	361700000	557910000
tr|Q4D5P1|Q4D5P1_TRYCC;tr|Q4DLT0|Q4DLT0_TRYCC;tr|Q4D3M8|Q4D3M8_TRYCC	tr|Q4D5P1|Q4D5P1_TRYCC;tr|Q4DLT0|Q4DLT0_TRYCC	24;17;1	24;17;1	24;17;1	>tr|Q4D5P1|Q4D5P1_TRYCC Aminopeptidase OS=Trypanosoma cruzi (strain CL Brener) GN=Tc00.1047053511051.70 PE=3 SV=1;>tr|Q4DLT0|Q4DLT0_TRYCC Aminopeptidase, putative (Fragment) OS=Trypanosoma cruzi (strain CL Brener) GN=Tc00.1047053509683.130 PE=4 SV=1	3	24	24	24	88	21	21	24	22	21	21	24	22	21	21	24	22	32.9	32.9	32.9	98381	870	870;491;117	1	311	0	205.94	By MS/MS	By MS/MS	By MS/MS	By MS/MS	By MS/MS	By MS/MS	27.2	27.2	25.6	25.6	32.9	28.4	19624000000	3263500000	4472500000	3427300000	4463700000
tr|Q4D5X2|Q4D5X2_TRYCC;tr|Q4CMB9|Q4CMB9_TRYCC	tr|Q4D5X2|Q4D5X2_TRYCC	27;3	27;3	16;3	>tr|Q4D5X2|Q4D5X2_TRYCC Clathrin heavy chain OS=Trypanosoma cruzi (strain CL Brener) GN=Tc00.1047053506167.50 PE=3 SV=1	2	27	27	16	88	21	19	24	24	21	19	24	24	15	15	14	14	20.1	20.1	11.8	192.89	1704	1704;413	1	295	0	258.52	By MS/MS	By MS/MS	By MS/MS	By MS/MS	By MS/MS	By MS/MS	14.7	13.6	13.1	13	17.7	17.8	16179000000	2565500000	3457200000	2812200000	4401700000
tr|Q4DPR3|Q4DPR3_TRYCC;tr|Q4CWV6|Q4CWV6_TRYCC	tr|Q4DPR3|Q4DPR3_TRYCC	23;8	23;8	14;8	>tr|Q4DPR3|Q4DPR3_TRYCC Mitochondrial processing peptidase, beta subunit, putative OS=Trypanosoma cruzi (strain CL Brener) GN=Tc00.1047053511181.50 PE=4 SV=1	2	23	23	14	87	21	23	21	22	21	23	21	22	12	14	12	13	65.8	65.8	39.5	54239	489	489;145	1	407	0	315.15	By MS/MS	By MS/MS	By MS/MS	By MS/MS	By MS/MS	By MS/MS	58.5	65.8	63.6	63.6	62	60.7	42957000000	6284700000	8690200000	5781000000	9457800000
tr|Q4CT43|Q4CT43_TRYCC;tr|Q4CMQ7|Q4CMQ7_TRYCC	tr|Q4CT43|Q4CT43_TRYCC;tr|Q4CMQ7|Q4CMQ7_TRYCC	24;20	24;20	17;17	>tr|Q4CT43|Q4CT43_TRYCC Trypanothione reductase, putative OS=Trypanosoma cruzi (strain CL Brener) GN=Tc00.1047053503555.30 PE=3 SV=1;>tr|Q4CMQ7|Q4CMQ7_TRYCC Trypanothione reductase, putative (Fragment) OS=Trypanosoma cruzi (strain CL Brener) GN=Tc00.104705	2	24	24	17	87	19	23	23	22	19	23	23	22	13	17	17	15	61.8	61.8	37.4	53868	492	492;388	1	358	0	144.74	By MS/MS	By MS/MS	By MS/MS	By MS/MS	By MS/MS	By MS/MS	44.9	57.1	53	55.3	60.2	54.7	29033000000	4712200000	5505100000	4732900000	7297000000
tr|Q4E3H4|Q4E3H4_TRYCC	tr|Q4E3H4|Q4E3H4_TRYCC	27	27	21	>tr|Q4E3H4|Q4E3H4_TRYCC Retrotransposon hot spot (RHS) protein, putative OS=Trypanosoma cruzi (strain CL Brener) GN=Tc00.1047053507611.10 PE=4 SV=1	1	27	27	21	87	17	19	25	26	17	19	25	26	13	14	19	21	39.2	39.2	31.4	108.59	946	946	1	292	0	323.31	By MS/MS	By MS/MS	By MS/MS	By MS/MS	By MS/MS	By MS/MS	21.9	25.9	24.6	23.6	37.1	39.2	17992000000	2945800000	3553400000	2598000000	4703000000
tr|Q4DYD9|Q4DYD9_TRYCC	tr|Q4DYD9|Q4DYD9_TRYCC	27	27	27	>tr|Q4DYD9|Q4DYD9_TRYCC Stress-induced protein sti1, putative OS=Trypanosoma cruzi (strain CL Brener) GN=Tc00.1047053506321.290 PE=4 SV=1	1	27	27	27	87	17	19	25	26	17	19	25	26	17	19	25	26	46.8	46.8	46.8	63.11	556	556	1	256	0	154.77	By MS/MS	By MS/MS	By MS/MS	By MS/MS	By MS/MS	By MS/MS	31.5	33.3	25	28.6	43.2	46.6	11806000000	1760400000	2285700000	2183900000	4126000000
tr|Q4E2R7|Q4E2R7_TRYCC	tr|Q4E2R7|Q4E2R7_TRYCC	22	21	21	>tr|Q4E2R7|Q4E2R7_TRYCC Carboxypeptidase, putative OS=Trypanosoma cruzi (strain CL Brener) GN=Tc00.1047053504153.160 PE=4 SV=1	1	22	21	21	86	21	21	22	22	20	20	21	21	20	20	21	21	49.1	47.7	47.7	57663	503	503	1	308	0	162.22	By MS/MS	By MS/MS	By MS/MS	By MS/MS	By MS/MS	By MS/MS	44.1	45.5	40.6	40.6	49.1	49.1	21047000000	3375100000	4243600000	3036000000	5357000000
tr|Q4D7D2|Q4D7D2_TRYCC	tr|Q4D7D2|Q4D7D2_TRYCC	24	5	5	>tr|Q4D7D2|Q4D7D2_TRYCC Thimet oligopeptidase, putative OS=Trypanosoma cruzi (strain CL Brener) GN=Tc00.1047053511237.10 PE=3 SV=1	1	24	5	5	86	19	21	22	24	5	4	5	5	5	4	5	5	33.8	6.7	6.7	77602	686	686	1	49	0	33074	By MS/MS	By MS/MS	By MS/MS	By MS/MS	By MS/MS	By MS/MS	29.2	30.5	29	28.9	31.3	33.8	2664600000	482620000	604480000	459120000	639840000
tr|Q4DSZ8|Q4DSZ8_TRYCC;tr|Q4CL51|Q4CL51_TRYCC	tr|Q4DSZ8|Q4DSZ8_TRYCC	25;2	25;2	9;0	>tr|Q4DSZ8|Q4DSZ8_TRYCC Uncharacterized protein OS=Trypanosoma cruzi (strain CL Brener) GN=Tc00.1047053509631.140 PE=4 SV=1	2	25	25	9	85	19	21	23	22	19	21	23	22	6	7	8	6	31.3	31.3	5	181.98	1587	1587;565	1	247	0	125.57	By MS/MS	By MS/MS	By MS/MS	By MS/MS	By MS/MS	By MS/MS	26.5	28.9	28.2	26.2	29.9	29.5	11685000000	2015700000	2498700000	1487000000	2689400000
tr|Q4CRF7|Q4CRF7_TRYCC;tr|Q4CRF6|Q4CRF6_TRYCC;tr|Q4CRF5|Q4CRF5_TRYCC	tr|Q4CRF7|Q4CRF7_TRYCC;tr|Q4CRF6|Q4CRF6_TRYCC;tr|Q4CRF5|Q4CRF5_TRYCC	25;23;14	25;23;14	3;1;1	>tr|Q4CRF7|Q4CRF7_TRYCC Elongation factor 1-alpha OS=Trypanosoma cruzi (strain CL Brener) GN=Tc00.1047053511369.10 PE=3 SV=1;>tr|Q4CRF6|Q4CRF6_TRYCC Elongation factor 1-alpha OS=Trypanosoma cruzi (strain CL Brener) GN=Tc00.1047053511367.370 PE=3 SV=1;>tr|Q	3	25	25	3	84	19	18	24	23	19	18	24	23	2	1	3	3	57.5	57.5	8.1	48346	442	442;449;282	1	786	0	323.31	By MS/MS	By MS/MS	By MS/MS	By MS/MS	By MS/MS	By MS/MS	48.2	45.5	43.7	46.6	57.5	54.8	247830000000	25808000000	45260000000	45003000000	105090000000
tr|Q4CZ29|Q4CZ29_TRYCC	tr|Q4CZ29|Q4CZ29_TRYCC	23	10	10	>tr|Q4CZ29|Q4CZ29_TRYCC Thiol-dependent reductase 1, putative OS=Trypanosoma cruzi (strain CL Brener) GN=Tc00.1047053503419.30 PE=4 SV=1	1	23	10	10	84	20	19	23	22	9	8	10	10	9	8	10	10	57.3	30.8	30.8	50682	445	445	1	203	0	136.47	By MS/MS	By MS/MS	By MS/MS	By MS/MS	By MS/MS	By MS/MS	53.3	49.4	55.7	55.7	57.3	57.3	26466000000	2934200000	4772600000	5274300000	8631600000
tr|Q4DME9|Q4DME9_TRYCC;tr|Q4DQ61|Q4DQ61_TRYCC;tr|Q4CYB8|Q4CYB8_TRYCC	tr|Q4DME9|Q4DME9_TRYCC	27;2;1	27;2;1	17;0;0	>tr|Q4DME9|Q4DME9_TRYCC Retrotransposon hot spot (RHS) protein, putative OS=Trypanosoma cruzi (strain CL Brener) GN=Tc00.1047053506443.150 PE=4 SV=1	3	27	27	17	84	18	19	23	24	18	19	23	24	11	11	14	16	43.1	43.1	29.9	91.98	799	799;500;502	1	253	0	247.11	By MS/MS	By MS/MS	By MS/MS	By MS/MS	By MS/MS	By MS/MS	26.9	28.2	27.7	25.4	34.9	38.8	11747000000	1954100000	2404900000	1899800000	2977100000
tr|Q4CW02|Q4CW02_TRYCC	tr|Q4CW02|Q4CW02_TRYCC	26	12	10	>tr|Q4CW02|Q4CW02_TRYCC Calpain-like cysteine peptidase, putative (Fragment) OS=Trypanosoma cruzi (strain CL Brener) GN=Tc00.1047053509013.10 PE=3 SV=1	1	26	12	10	84	19	22	22	21	9	10	9	9	7	9	7	8	29.5	14.2	12.2	154.66	1351	1351	1	103	0	152.97	By MS/MS	By MS/MS	By MS/MS	By MS/MS	By MS/MS	By MS/MS	21.2	24.9	19.3	19.2	25.3	25	3883700000	777110000	1001400000	494820000	911220000
tr|Q4CYZ5|Q4CYZ5_TRYCC	tr|Q4CYZ5|Q4CYZ5_TRYCC	22	22	5	>tr|Q4CYZ5|Q4CYZ5_TRYCC Glutamamyl carboxypeptidase, putative OS=Trypanosoma cruzi (strain CL Brener) GN=Tc00.1047053507689.40 PE=4 SV=1	1	22	22	5	83	22	19	21	21	22	19	21	21	5	4	5	5	76	76	19.2	43433	396	396	1	621	0	323.31	By MS/MS	By MS/MS	By MS/MS	By MS/MS	By MS/MS	By MS/MS	76	67.9	73.7	72.2	73.7	73.7	234360000000	40173000000	42430000000	36045000000	62667000000
tr|Q4DTX7|Q4DTX7_TRYCC;tr|Q4CQJ3|Q4CQJ3_TRYCC	tr|Q4DTX7|Q4DTX7_TRYCC	22;8	22;8	22;8	>tr|Q4DTX7|Q4DTX7_TRYCC ATP synthase subunit beta OS=Trypanosoma cruzi (strain CL Brener) GN=Tc00.1047053509233.180 PE=3 SV=1	2	22	22	22	83	19	20	22	22	19	20	22	22	19	20	22	22	51.2	51.2	51.2	55.73	518	518;193	1	466	0	323.31	By MS/MS	By MS/MS	By MS/MS	By MS/MS	By MS/MS	By MS/MS	43.8	46.3	40.7	35.1	51.2	51.2	47622000000	5656900000	8679400000	11903000000	14870000000
tr|Q4D2F2|Q4D2F2_TRYCC	tr|Q4D2F2|Q4D2F2_TRYCC	24	24	21	>tr|Q4D2F2|Q4D2F2_TRYCC Isoleucyl-tRNA synthetase, putative OS=Trypanosoma cruzi (strain CL Brener) GN=Tc00.1047053509797.40 PE=3 SV=1	1	24	24	21	83	17	19	23	24	17	19	23	24	15	17	20	21	27.7	27.7	24.4	132.38	1156	1156	1	256	0	197.81	By MS/MS	By MS/MS	By MS/MS	By MS/MS	By MS/MS	By MS/MS	22.9	23.1	23	20.7	25.8	27.7	10091000000	1513800000	1825600000	2187600000	3424200000
tr|Q4D770|Q4D770_TRYCC	tr|Q4D770|Q4D770_TRYCC	25	5	5	>tr|Q4D770|Q4D770_TRYCC Uncharacterized protein OS=Trypanosoma cruzi (strain CL Brener) GN=Tc00.1047053508265.100 PE=4 SV=1	1	25	5	5	83	19	19	23	22	2	3	5	4	2	3	5	4	32.3	8	8	133.25	1166	1166	1	24	0	22197	By MS/MS	By MS/MS	By matching	By matching	By MS/MS	By MS/MS	21.1	22.4	16.9	19.3	29.8	28.6	626070000	105870000	184070000	109760000	226360000
tr|Q4DB81|Q4DB81_TRYCC;tr|Q4D8V7|Q4D8V7_TRYCC	tr|Q4DB81|Q4DB81_TRYCC;tr|Q4D8V7|Q4D8V7_TRYCC	22;22	22;22	22;22	>tr|Q4DB81|Q4DB81_TRYCC Glycosomal phosphoenolpyruvate carboxykinase, putative OS=Trypanosoma cruzi (strain CL Brener) GN=Tc00.1047053508441.20 PE=3 SV=1;>tr|Q4D8V7|Q4D8V7_TRYCC Glycosomal phosphoenolpyruvate carboxykinase, putative OS=Trypanosoma cruzi (s	2	22	22	22	81	19	20	21	21	19	20	21	21	19	20	21	21	45.1	45.1	45.1	58864	525	525;525	1	282	0	209.41	By MS/MS	By MS/MS	By MS/MS	By MS/MS	By MS/MS	By MS/MS	40	39.8	33.5	33.5	44	41.5	53895000000	8344600000	11590000000	8514200000	16565000000
tr|Q4E4V7|Q4E4V7_TRYCC	tr|Q4E4V7|Q4E4V7_TRYCC	23	23	2	>tr|Q4E4V7|Q4E4V7_TRYCC Prostaglandin F2alpha synthase OS=Trypanosoma cruzi (strain CL Brener) GN=Tc00.1047053508461.80 PE=4 SV=1	1	23	23	2	80	18	19	21	22	18	19	21	22	2	2	2	2	62.5	62.5	8.2	42237	379	379	1	413	0	323.31	By MS/MS	By MS/MS	By MS/MS	By MS/MS	By MS/MS	By MS/MS	47.5	51.2	44.9	39.8	56.7	62.5	158290000000	23829000000	34233000000	27208000000	48084000000
tr|Q4CY57|Q4CY57_TRYCC	tr|Q4CY57|Q4CY57_TRYCC	24	24	8	>tr|Q4CY57|Q4CY57_TRYCC Uncharacterized protein (Fragment) OS=Trypanosoma cruzi (strain CL Brener) GN=Tc00.1047053510317.7 PE=4 SV=1	1	24	24	8	80	16	19	21	24	16	19	21	24	6	6	7	8	26	26	10.6	142.15	1279	1279	1	243	0	299.15	By MS/MS	By MS/MS	By MS/MS	By MS/MS	By MS/MS	By MS/MS	17.8	19.3	16.3	17.9	21.9	26	11976000000	1852100000	2584400000	1950500000	3087600000
tr|Q4DQP2|Q4DQP2_TRYCC;CON__ENSEMBL:ENSBTAP00000025008	tr|Q4DQP2|Q4DQP2_TRYCC	23;1	23;1	23;1	>tr|Q4DQP2|Q4DQP2_TRYCC Tubulin beta chain OS=Trypanosoma cruzi (strain CL Brener) GN=Tc00.1047053506563.40 PE=3 SV=1	2	23	23	23	79	16	18	23	22	16	18	23	22	16	18	23	22	64	64	64	49699	442	442;536	1	1055	0	323.31	By MS/MS	By MS/MS	By MS/MS	By MS/MS	By MS/MS	By MS/MS	40.5	47.5	37.8	47.7	64	63.8	437230000000	67359000000	94602000000	74122000000	113460000000
tr|Q4DYF9|Q4DYF9_TRYCC;tr|Q4CXI1|Q4CXI1_TRYCC;tr|Q4CXI2|Q4CXI2_TRYCC;tr|Q4CU73|Q4CU73_TRYCC;tr|Q4CRF8|Q4CRF8_TRYCC	tr|Q4DYF9|Q4DYF9_TRYCC;tr|Q4CXI1|Q4CXI1_TRYCC;tr|Q4CXI2|Q4CXI2_TRYCC	23;23;20;8;6	1;1;1;0;0	1;1;1;0;0	>tr|Q4DYF9|Q4DYF9_TRYCC Elongation factor 1-alpha OS=Trypanosoma cruzi (strain CL Brener) GN=Tc00.1047053511367.360 PE=3 SV=1;>tr|Q4CXI1|Q4CXI1_TRYCC Elongation factor 1-alpha OS=Trypanosoma cruzi (strain CL Brener) GN=Tc00.1047053510119.20 PE=3 SV=1;>tr|Q	5	23	1	1	79	18	18	22	21	1	1	1	1	1	1	1	1	53.7	5.1	5.1	49128	449	449;449;389;175;149	1	135	0	246.95	By MS/MS	By MS/MS	By MS/MS	By MS/MS	By MS/MS	By MS/MS	44.8	44.8	43	43	53.7	51	41340000000	6808100000	7711200000	6896300000	12406000000
tr|Q4CQ52|Q4CQ52_TRYCC;tr|Q4CNY1|Q4CNY1_TRYCC;tr|Q4CP01|Q4CP01_TRYCC	tr|Q4CQ52|Q4CQ52_TRYCC;tr|Q4CNY1|Q4CNY1_TRYCC	24;17;7	24;17;7	13;6;6	>tr|Q4CQ52|Q4CQ52_TRYCC Plasma membrane ATPase (Fragment) OS=Trypanosoma cruzi (strain CL Brener) GN=Tc00.1047053505763.19 PE=3 SV=1;>tr|Q4CNY1|Q4CNY1_TRYCC Plasma membrane ATPase OS=Trypanosoma cruzi (strain CL Brener) GN=Tc00.1047053506333.10 PE=3 SV=1	3	24	24	13	79	17	19	23	20	17	19	23	20	8	10	12	10	54.8	54.8	29.6	70863	646	646;484;219	1	244	0	154.24	By MS/MS	By MS/MS	By MS/MS	By MS/MS	By MS/MS	By MS/MS	36.4	43.7	35.1	37	54.6	41	26931000000	4736200000	5437400000	4242100000	7904400000
tr|Q4CMA6|Q4CMA6_TRYCC	tr|Q4CMA6|Q4CMA6_TRYCC	24	21	10	>tr|Q4CMA6|Q4CMA6_TRYCC Retrotransposon hot spot (RHS) protein, putative (Fragment) OS=Trypanosoma cruzi (strain CL Brener) GN=Tc00.1047053503483.9 PE=4 SV=1	1	24	21	10	79	18	19	20	22	15	16	17	20	8	8	7	10	31	27.8	15.4	103.31	916	916	1	197	0	98743	By MS/MS	By MS/MS	By MS/MS	By MS/MS	By MS/MS	By MS/MS	24.8	26	20.9	16.5	25.2	28.7	15367000000	2210100000	2918800000	2746400000	5189900000
tr|Q4E133|Q4E133_TRYCC	tr|Q4E133|Q4E133_TRYCC	21	21	21	>tr|Q4E133|Q4E133_TRYCC Histidine ammonia-lyase OS=Trypanosoma cruzi (strain CL Brener) GN=Tc00.1047053506247.220 PE=3 SV=1	1	21	21	21	78	18	18	21	21	18	18	21	21	18	18	21	21	46.3	46.3	46.3	58081	534	534	1	382	0	323.31	By MS/MS	By MS/MS	By MS/MS	By MS/MS	By MS/MS	By MS/MS	37.5	37.5	36.1	36.1	46.3	46.3	54405000000	8375800000	10261000000	9418400000	16078000000
tr|Q4D9G6|Q4D9G6_TRYCC	tr|Q4D9G6|Q4D9G6_TRYCC	24	24	8	>tr|Q4D9G6|Q4D9G6_TRYCC Threonyl-tRNA synthetase, putative OS=Trypanosoma cruzi (strain CL Brener) GN=Tc00.1047053508299.80 PE=3 SV=1	1	24	24	8	78	17	20	20	21	17	20	20	21	6	5	7	7	39.6	39.6	14.2	92645	816	816	1	311	0	260.58	By MS/MS	By MS/MS	By MS/MS	By MS/MS	By MS/MS	By MS/MS	30.9	32.2	34.4	32.4	33	36.4	22116000000	3820500000	4519300000	3057000000	4740700000
tr|Q4DZ98|Q4DZ98_TRYCC	tr|Q4DZ98|Q4DZ98_TRYCC	20	20	20	>tr|Q4DZ98|Q4DZ98_TRYCC Enolase, putative OS=Trypanosoma cruzi (strain CL Brener) GN=Tc00.1047053504105.140 PE=1 SV=1	1	20	20	20	77	18	19	20	20	18	19	20	20	18	19	20	20	58.5	58.5	58.5	46443	429	429	1	286	0	176.45	By MS/MS	By MS/MS	By MS/MS	By MS/MS	By MS/MS	By MS/MS	54.5	56.9	47.6	45	58.5	58.5	43553000000	6586400000	10076000000	7797100000	13452000000
tr|Q4E0D8|Q4E0D8_TRYCC	tr|Q4E0D8|Q4E0D8_TRYCC	21	21	8	>tr|Q4E0D8|Q4E0D8_TRYCC Calpain-like cysteine peptidase, putative OS=Trypanosoma cruzi (strain CL Brener) GN=Tc00.1047053508999.190 PE=3 SV=1	1	21	21	8	77	18	19	20	20	18	19	20	20	8	8	8	8	29.9	29.9	11.7	95766	837	837	1	257	0	323.31	By MS/MS	By MS/MS	By MS/MS	By MS/MS	By MS/MS	By MS/MS	27	27	23.7	27.1	29	29	26951000000	4348800000	5114400000	4217900000	7213900000
tr|Q4CXW2|Q4CXW2_TRYCC;tr|Q4DLA7|Q4DLA7_TRYCC;tr|Q4DH08|Q4DH08_TRYCC;tr|Q4CWR8|Q4CWR8_TRYCC;tr|Q4DZ48|Q4DZ48_TRYCC	tr|Q4CXW2|Q4CXW2_TRYCC	20;2;1;1;1	20;2;1;1;1	17;1;1;1;1	>tr|Q4CXW2|Q4CXW2_TRYCC Elongation factor 1-gamma (EF-1-gamma), putative OS=Trypanosoma cruzi (strain CL Brener) GN=Tc00.1047053510163.20 PE=4 SV=1	5	20	20	17	75	19	18	20	18	19	18	20	18	16	15	17	15	56.2	56.2	47.7	46584	411	411;208;208;208;241	1	325	0	323.31	By MS/MS	By MS/MS	By MS/MS	By MS/MS	By MS/MS	By MS/MS	56.2	54.3	54.3	53.5	56.2	54.7	44715000000	7905300000	8007200000	8302000000	11367000000
tr|Q4DG71|Q4DG71_TRYCC	tr|Q4DG71|Q4DG71_TRYCC	22	6	6	>tr|Q4DG71|Q4DG71_TRYCC Uncharacterized protein (Fragment) OS=Trypanosoma cruzi (strain CL Brener) GN=Tc00.1047053506201.170 PE=4 SV=1	1	22	6	6	75	17	18	20	20	4	4	5	4	4	4	5	4	39.4	8.8	8.8	96822	838	838	1	39	0	81326	By MS/MS	By MS/MS	By MS/MS	By MS/MS	By MS/MS	By MS/MS	30.5	33.8	33.8	30.1	37.9	36.3	435680000	82430000	105310000	61810000	68126000
tr|Q4DYW4|Q4DYW4_TRYCC	tr|Q4DYW4|Q4DYW4_TRYCC	25	23	12	>tr|Q4DYW4|Q4DYW4_TRYCC Retrotransposon hot spot (RHS) protein, putative OS=Trypanosoma cruzi (strain CL Brener) GN=Tc00.1047053507167.20 PE=4 SV=1	1	25	23	12	74	14	13	23	24	13	12	21	22	6	6	11	11	34.3	31.7	18.2	108.2	944	944	1	219	0	176.98	By MS/MS	By MS/MS	By MS/MS	By MS/MS	By MS/MS	By MS/MS	19.3	18.8	20.6	17.3	34.2	32.4	17812000000	2461100000	3491900000	3527300000	6046300000
tr|Q4DPR0|Q4DPR0_TRYCC	tr|Q4DPR0|Q4DPR0_TRYCC	23	7	7	>tr|Q4DPR0|Q4DPR0_TRYCC Threonyl-tRNA synthetase, putative OS=Trypanosoma cruzi (strain CL Brener) GN=Tc00.1047053511181.80 PE=3 SV=1	1	23	7	7	74	17	19	18	20	6	4	5	6	6	4	5	6	38.2	12.9	12.9	92746	817	817	1	89	0	47899	By MS/MS	By MS/MS	By MS/MS	By MS/MS	By MS/MS	By MS/MS	31.6	32.8	35	35.5	32.9	34.9	5086800000	598030000	1140100000	764010000	1634900000
tr|Q4D4Y8|Q4D4Y8_TRYCC	tr|Q4D4Y8|Q4D4Y8_TRYCC	24	24	13	>tr|Q4D4Y8|Q4D4Y8_TRYCC Uncharacterized protein (Fragment) OS=Trypanosoma cruzi (strain CL Brener) GN=Tc00.1047053508533.10 PE=4 SV=1	1	24	24	13	74	15	19	22	18	15	19	22	18	7	11	12	10	16.9	16.9	7	315.9	2812	2812	1	193	0	90371	By MS/MS	By MS/MS	By MS/MS	By MS/MS	By MS/MS	By MS/MS	11.2	13.3	10.3	9.5	15.8	12.9	7836400000	1237600000	1936000000	1226700000	1925000000
tr|Q4CYZ6|Q4CYZ6_TRYCC;tr|Q4CYZ4|Q4CYZ4_TRYCC	tr|Q4CYZ6|Q4CYZ6_TRYCC;tr|Q4CYZ4|Q4CYZ4_TRYCC	19;10	2;1	1;1	>tr|Q4CYZ6|Q4CYZ6_TRYCC Glutamamyl carboxypeptidase, putative OS=Trypanosoma cruzi (strain CL Brener) GN=Tc00.1047053507689.30 PE=4 SV=1;>tr|Q4CYZ4|Q4CYZ4_TRYCC Glutamamyl carboxypeptidase, putative (Fragment) OS=Trypanosoma cruzi (strain CL Brener) GN=Tc0	2	19	2	1	73	19	18	18	18	2	2	2	2	1	1	1	1	61.6	6.6	4	43565	396	396;259	1	28	0	46103	By MS/MS	By MS/MS	By MS/MS	By MS/MS	By MS/MS	By MS/MS	61.6	59.3	59.3	61.6	59.3	59.3	12725000000	59471000	4178900000	2528200000	4132400000
tr|Q4DAE1|Q4DAE1_TRYCC;tr|Q4CU51|Q4CU51_TRYCC	tr|Q4DAE1|Q4DAE1_TRYCC;tr|Q4CU51|Q4CU51_TRYCC	20;13	20;13	6;0	>tr|Q4DAE1|Q4DAE1_TRYCC D-isomer specific 2-hydroxyacid dehydrogenase-protein, putative OS=Trypanosoma cruzi (strain CL Brener) GN=Tc00.1047053510099.120 PE=4 SV=1;>tr|Q4CU51|Q4CU51_TRYCC D-isomer specific 2-hydroxyacid dehydrogenase-protein, putative OS=T	2	20	20	6	72	18	17	19	18	18	17	19	18	5	5	6	6	53.2	53.2	16.5	38.51	340	340;198	1	346	0	323.31	By MS/MS	By MS/MS	By MS/MS	By MS/MS	By MS/MS	By MS/MS	51.2	49.4	42.9	46.5	52.1	52.1	136540000000	28973000000	33142000000	22959000000	35506000000
tr|Q4DJ92|Q4DJ92_TRYCC	tr|Q4DJ92|Q4DJ92_TRYCC	20	20	3	>tr|Q4DJ92|Q4DJ92_TRYCC Uncharacterized protein OS=Trypanosoma cruzi (strain CL Brener) GN=Tc00.1047053511815.170 PE=4 SV=1	1	20	20	3	72	16	17	19	20	16	17	19	20	3	3	3	3	61.6	61.6	12.7	60571	536	536	1	396	0	323.31	By MS/MS	By MS/MS	By MS/MS	By MS/MS	By MS/MS	By MS/MS	54.7	56	52.6	54.7	60.3	61.6	34677000000	6604100000	7021400000	5073400000	7186600000
tr|Q4CR09|Q4CR09_TRYCC;tr|Q4CR10|Q4CR10_TRYCC	tr|Q4CR09|Q4CR09_TRYCC;tr|Q4CR10|Q4CR10_TRYCC	19;18	3;2	1;0	>tr|Q4CR09|Q4CR09_TRYCC Glutamamyl carboxypeptidase, putative OS=Trypanosoma cruzi (strain CL Brener) GN=Tc00.1047053510837.20 PE=4 SV=1;>tr|Q4CR10|Q4CR10_TRYCC Acetylornithine deacetylase, putative (Fragment) OS=Trypanosoma cruzi (strain CL Brener) GN=Tc0	2	19	3	1	72	19	17	18	18	3	3	3	3	1	1	1	1	62.9	14.9	4	43534	396	396;314	1	60	0	47338	By MS/MS	By MS/MS	By MS/MS	By MS/MS	By MS/MS	By MS/MS	62.9	56.8	60.6	59.1	60.6	60.6	21409000000	4068900000	3988700000	3286300000	3361800000
tr|Q4DC68|Q4DC68_TRYCC	tr|Q4DC68|Q4DC68_TRYCC	22	22	11	>tr|Q4DC68|Q4DC68_TRYCC Seryl-tRNA synthetase, putative OS=Trypanosoma cruzi (strain CL Brener) GN=Tc00.1047053506777.80 PE=4 SV=1	1	22	22	11	72	15	14	21	22	15	14	21	22	9	9	10	11	47	47	21.8	53377	477	477	1	226	0	160.43	By MS/MS	By MS/MS	By MS/MS	By MS/MS	By MS/MS	By MS/MS	31.9	31.9	26	26	45.3	47	26085000000	4180400000	4765200000	4410700000	7632700000
tr|Q4E644|Q4E644_TRYCC;tr|Q4D391|Q4D391_TRYCC	tr|Q4E644|Q4E644_TRYCC	23;2	7;2	7;2	>tr|Q4E644|Q4E644_TRYCC Uncharacterized protein OS=Trypanosoma cruzi (strain CL Brener) GN=Tc00.1047053508153.460 PE=4 SV=1	2	23	7	7	72	13	18	20	21	3	5	6	5	3	5	6	5	19.6	7.3	7.3	176.34	1590	1590;255	1	48	0	50381	By MS/MS	By MS/MS	By MS/MS	By MS/MS	By MS/MS	By MS/MS	11.6	14.3	11.1	11.6	17	17.6	2173700000	181160000	541480000	468760000	684520000
tr|Q4D673|Q4D673_TRYCC	tr|Q4D673|Q4D673_TRYCC	23	2	2	>tr|Q4D673|Q4D673_TRYCC Heat shock protein, putative (Fragment) OS=Trypanosoma cruzi (strain CL Brener) GN=Tc00.1047053511263.9 PE=3 SV=1	1	23	2	2	72	16	16	18	22	2	1	2	2	2	1	2	2	38.5	4.5	4.5	65503	584	584	1	14	0	31489	By matching	By matching	By matching	By matching	By MS/MS	By MS/MS	28.6	26	24.3	24.3	33.6	36.5	589820000	26108000	21814000	183910000	336780000
tr|Q4DQ33|Q4DQ33_TRYCC;tr|Q4D747|Q4D747_TRYCC	tr|Q4DQ33|Q4DQ33_TRYCC;tr|Q4D747|Q4D747_TRYCC	23;20	23;20	23;20	>tr|Q4DQ33|Q4DQ33_TRYCC Alanine--tRNA ligase OS=Trypanosoma cruzi (strain CL Brener) GN=Tc00.1047053511825.220 PE=3 SV=1;>tr|Q4D747|Q4D747_TRYCC Alanine--tRNA ligase OS=Trypanosoma cruzi (strain CL Brener) GN=Tc00.1047053506863.10 PE=3 SV=1	2	23	23	23	71	14	15	21	21	14	15	21	21	14	15	21	21	35.7	35.7	35.7	106.19	959	959;959	1	219	0	158.36	By MS/MS	By MS/MS	By MS/MS	By MS/MS	By MS/MS	By MS/MS	21.4	22.3	23.5	21.2	32.8	32.3	9515800000	1370700000	2144600000	1612300000	2807700000
tr|Q4DY15|Q4DY15_TRYCC;tr|Q4DJN3|Q4DJN3_TRYCC	tr|Q4DY15|Q4DY15_TRYCC	24;6	24;6	20;6	>tr|Q4DY15|Q4DY15_TRYCC Uncharacterized protein OS=Trypanosoma cruzi (strain CL Brener) GN=Tc00.1047053506357.130 PE=4 SV=1	2	24	24	20	71	14	13	21	23	14	13	21	23	11	10	17	19	13.3	13.3	11	287.66	2609	2609;593	1	157	0	126.15	By MS/MS	By MS/MS	By MS/MS	By MS/MS	By MS/MS	By MS/MS	7.6	7.2	5	4.1	11.6	12.8	3530600000	410070000	425480000	1032500000	1376500000
tr|Q4E589|Q4E589_TRYCC	tr|Q4E589|Q4E589_TRYCC	21	21	21	>tr|Q4E589|Q4E589_TRYCC Uncharacterized protein OS=Trypanosoma cruzi (strain CL Brener) GN=Tc00.1047053506559.410 PE=4 SV=1	1	21	21	21	70	15	15	20	20	15	15	20	20	15	15	20	20	64.6	64.6	64.6	42107	373	373	1	234	0	182.17	By MS/MS	By MS/MS	By MS/MS	By MS/MS	By MS/MS	By MS/MS	47.7	47.5	38.9	46.6	63.3	63.3	17921000000	3304500000	3907700000	2588000000	4898600000
tr|Q4E595|Q4E595_TRYCC	tr|Q4E595|Q4E595_TRYCC	22	22	22	>tr|Q4E595|Q4E595_TRYCC Asparaginyl-tRNA synthetase, putative OS=Trypanosoma cruzi (strain CL Brener) GN=Tc00.1047053506559.350 PE=4 SV=1	1	22	22	22	70	16	16	19	19	16	16	19	19	16	16	19	19	38.5	38.5	38.5	84542	745	745	1	249	0	140.1	By MS/MS	By MS/MS	By MS/MS	By MS/MS	By MS/MS	By MS/MS	30.9	30.2	32.3	30.3	36.1	33	12445000000	1912300000	2169100000	2060900000	3807100000
tr|Q4CX26|Q4CX26_TRYCC	tr|Q4CX26|Q4CX26_TRYCC	22	11	8	>tr|Q4CX26|Q4CX26_TRYCC Retrotransposon hot spot (RHS) protein, putative OS=Trypanosoma cruzi (strain CL Brener) GN=Tc00.1047053507501.10 PE=4 SV=1	1	22	11	8	70	14	15	20	21	6	7	10	10	5	6	8	7	29.7	16.2	11.8	103.59	913	913	1	119	0	109.5	By MS/MS	By MS/MS	By MS/MS	By MS/MS	By MS/MS	By MS/MS	19.8	23.3	19.8	14.6	27.1	26.2	11620000000	1662700000	2666400000	2195400000	3387200000
tr|Q4CPW6|Q4CPW6_TRYCC	tr|Q4CPW6|Q4CPW6_TRYCC	19	3	1	>tr|Q4CPW6|Q4CPW6_TRYCC Glutamamyl carboxypeptidase, putative OS=Trypanosoma cruzi (strain CL Brener) GN=Tc00.1047053507657.10 PE=4 SV=1	1	19	3	1	70	18	17	17	18	2	2	2	3	0	0	1	1	65.4	10.6	3.8	43494	396	396	1	25	0	28433	By matching	By matching	By matching	By matching	By MS/MS	By MS/MS	61.6	57.8	61.6	57.8	60.4	63.1	1439900000	279220000	321460000	80445000	305120000
tr|Q4DU88|Q4DU88_TRYCC	tr|Q4DU88|Q4DU88_TRYCC	20	20	20	>tr|Q4DU88|Q4DU88_TRYCC Uncharacterized protein OS=Trypanosoma cruzi (strain CL Brener) GN=Tc00.1047053511903.40 PE=4 SV=1	1	20	20	20	69	15	15	19	20	15	15	19	20	15	15	19	20	47.3	47.3	47.3	54754	499	499	1	210	0	192.53	By MS/MS	By MS/MS	By MS/MS	By MS/MS	By MS/MS	By MS/MS	32.9	38.7	24.2	28.5	47.3	47.3	20404000000	3474400000	4426100000	3567300000	5962100000
tr|Q4CLA1|Q4CLA1_TRYCC	tr|Q4CLA1|Q4CLA1_TRYCC	20	20	20	>tr|Q4CLA1|Q4CLA1_TRYCC Tubulin alpha chain OS=Trypanosoma cruzi (strain CL Brener) GN=Tc00.1047053411235.9 PE=3 SV=1	1	20	20	20	68	16	15	19	18	16	15	19	18	16	15	19	18	62.3	62.3	62.3	49799	451	451	1	1060	0	323.31	By MS/MS	By MS/MS	By MS/MS	By MS/MS	By MS/MS	By MS/MS	51	49.9	52.8	54.3	61.2	57.6	500660000000	86389000000	67646000000	109660000000	127500000000
sp|Q4DJ07|PGFS_TRYCC	sp|Q4DJ07|PGFS_TRYCC	18	18	18	>sp|Q4DJ07|PGFS_TRYCC Prostaglandin F synthase OS=Trypanosoma cruzi (strain CL Brener) GN=Tc00.1047053511287.49 PE=1 SV=2	1	18	18	18	68	17	17	18	16	17	17	18	16	17	17	18	16	67.8	67.8	67.8	32571	283	283	1	286	0	185.76	By MS/MS	By MS/MS	By MS/MS	By MS/MS	By MS/MS	By MS/MS	67.1	65.7	64.7	66.8	67.8	66.8	65584000000	12171000000	16835000000	8468800000	12322000000
tr|Q4E5P5|Q4E5P5_TRYCC	tr|Q4E5P5|Q4E5P5_TRYCC	19	19	1	>tr|Q4E5P5|Q4E5P5_TRYCC Cytochrome C oxidase subunit IV, putative OS=Trypanosoma cruzi (strain CL Brener) GN=Tc00.1047053506529.360 PE=4 SV=1	1	19	19	1	68	16	17	17	18	16	17	17	18	1	1	1	1	53	53	2.4	38948	334	334	1	300	0	275.77	By MS/MS	By MS/MS	By MS/MS	By MS/MS	By MS/MS	By MS/MS	47.6	50.3	47.6	45.5	50.6	53	51916000000	8498400000	10093000000	7058100000	10963000000
tr|Q4D5T6|Q4D5T6_TRYCC	tr|Q4D5T6|Q4D5T6_TRYCC	23	15	13	>tr|Q4D5T6|Q4D5T6_TRYCC Retrotransposon hot spot (RHS) protein, putative OS=Trypanosoma cruzi (strain CL Brener) GN=Tc00.1047053507555.80 PE=4 SV=1	1	23	15	13	68	16	15	19	18	11	10	13	13	9	8	11	11	32.8	25.1	21.7	104.58	918	918	1	150	0	101.79	By MS/MS	By MS/MS	By MS/MS	By MS/MS	By MS/MS	By MS/MS	22	20.4	19.8	18	26.3	25.7	12845000000	1955900000	2634800000	2226200000	3455300000
tr|Q4E2P2|Q4E2P2_TRYCC	tr|Q4E2P2|Q4E2P2_TRYCC	19	1	1	>tr|Q4E2P2|Q4E2P2_TRYCC Cytochrome C oxidase subunit IV, putative OS=Trypanosoma cruzi (strain CL Brener) GN=Tc00.1047053510889.50 PE=4 SV=1	1	19	1	1	68	16	17	17	18	1	1	1	1	1	1	1	1	53	2.4	2.4	38908	334	334	1	8	1	-2	By matching	By MS/MS	By MS/MS	By MS/MS	By matching	By matching	47.6	50.3	50	45.5	50.6	53	589060000	57607000	101970000	32987000	152970000
tr|Q4DGG5|Q4DGG5_TRYCC	tr|Q4DGG5|Q4DGG5_TRYCC	19	19	4	>tr|Q4DGG5|Q4DGG5_TRYCC Vacuolar-type proton translocating pyrophosphatase 1, putative OS=Trypanosoma cruzi (strain CL Brener) GN=Tc00.1047053510773.20 PE=3 SV=1	1	19	19	4	67	16	17	19	15	16	17	19	15	1	2	4	1	30.5	30.5	10.6	85337	814	814	1	274	0	323.31	By MS/MS	By MS/MS	By MS/MS	By MS/MS	By MS/MS	By MS/MS	21.1	26.2	25.4	26.2	30.5	21.1	44608000000	8643400000	11107000000	5681500000	9580400000
tr|Q4CMD9|Q4CMD9_TRYCC;tr|Q4CN21|Q4CN21_TRYCC;tr|Q4CT79|Q4CT79_TRYCC	tr|Q4CMD9|Q4CMD9_TRYCC;tr|Q4CN21|Q4CN21_TRYCC	20;10;9	20;10;9	11;6;5	>tr|Q4CMD9|Q4CMD9_TRYCC Fatty acyl CoA synthetase 2, putative OS=Trypanosoma cruzi (strain CL Brener) GN=Tc00.1047053506261.10 PE=4 SV=1;>tr|Q4CN21|Q4CN21_TRYCC Fatty acyl CoA synthetase 2, putative (Fragment) OS=Trypanosoma cruzi (strain CL Brener) GN=Tc0	3	20	20	11	67	15	17	18	17	15	17	18	17	8	9	9	9	39.1	39.1	24.2	78367	695	695;345;237	1	199	0	163.82	By MS/MS	By MS/MS	By MS/MS	By MS/MS	By MS/MS	By MS/MS	30.6	31.8	25.3	20.6	38.1	33.1	9001500000	1380500000	1975900000	1624000000	2578500000
tr|Q4D015|Q4D015_TRYCC	tr|Q4D015|Q4D015_TRYCC	21	21	21	>tr|Q4D015|Q4D015_TRYCC Uncharacterized protein OS=Trypanosoma cruzi (strain CL Brener) GN=Tc00.1047053511803.40 PE=4 SV=1	1	21	21	21	67	15	15	18	19	15	15	18	19	15	15	18	19	36.4	36.4	36.4	69999	618	618	1	177	0	150.87	By MS/MS	By MS/MS	By MS/MS	By MS/MS	By MS/MS	By MS/MS	24.9	27.7	24.9	24.9	34.6	36.2	10137000000	1655000000	2162700000	1592300000	2851500000
tr|Q4CSZ2|Q4CSZ2_TRYCC;tr|Q4D137|Q4D137_TRYCC;tr|Q4D139|Q4D139_TRYCC;tr|Q4D2S5|Q4D2S5_TRYCC	tr|Q4CSZ2|Q4CSZ2_TRYCC;tr|Q4D137|Q4D137_TRYCC;tr|Q4D139|Q4D139_TRYCC	17;16;15;7	17;16;15;7	17;16;15;7	>tr|Q4CSZ2|Q4CSZ2_TRYCC Calmodulin OS=Trypanosoma cruzi (strain CL Brener) GN=Tc00.1047053506391.10 PE=4 SV=1;>tr|Q4D137|Q4D137_TRYCC Calmodulin OS=Trypanosoma cruzi (strain CL Brener) GN=Tc00.1047053507483.50 PE=4 SV=1;>tr|Q4D139|Q4D139_TRYCC Calmodulin,	4	17	17	17	66	16	17	16	17	16	17	16	17	16	17	16	17	96	96	96	16824	149	149;149;207;85	1	320	0	323.31	By MS/MS	By MS/MS	By MS/MS	By MS/MS	By MS/MS	By MS/MS	96	96	96	89.9	96	96	72572000000	13832000000	18412000000	8836200000	13206000000
tr|Q4CSK6|Q4CSK6_TRYCC;tr|Q4CLP6|Q4CLP6_TRYCC;tr|Q4CLP5|Q4CLP5_TRYCC	tr|Q4CSK6|Q4CSK6_TRYCC;tr|Q4CLP6|Q4CLP6_TRYCC;tr|Q4CLP5|Q4CLP5_TRYCC	17;17;15	17;17;15	1;1;1	>tr|Q4CSK6|Q4CSK6_TRYCC Uncharacterized protein OS=Trypanosoma cruzi (strain CL Brener) GN=Tc00.1047053509141.40 PE=4 SV=1;>tr|Q4CLP6|Q4CLP6_TRYCC Uncharacterized protein OS=Trypanosoma cruzi (strain CL Brener) GN=Tc00.1047053511687.10 PE=4 SV=1;>tr|Q4CLP5	3	17	17	1	66	17	16	16	17	17	16	16	17	1	1	1	1	64.7	64.7	8.1	29.64	272	272;272;251	1	484	0	246.43	By MS/MS	By MS/MS	By MS/MS	By MS/MS	By MS/MS	By MS/MS	64.7	62.1	64.7	61.8	62.1	64.7	56029000000	9222800000	12465000000	6517700000	14498000000
sp|Q9GT49|TRYS_TRYCC	sp|Q9GT49|TRYS_TRYCC	20	20	20	>sp|Q9GT49|TRYS_TRYCC Trypanothione synthetase OS=Trypanosoma cruzi (strain CL Brener) GN=TRS PE=1 SV=1	1	20	20	20	66	13	14	20	19	13	14	20	19	13	14	20	19	40.8	40.8	40.8	73457	647	647	1	203	0	137.22	By MS/MS	By MS/MS	By MS/MS	By MS/MS	By MS/MS	By MS/MS	26.1	27.5	25.5	24.3	40.8	37.6	11822000000	1508600000	1969900000	2422300000	4433000000
tr|Q4DVF9|Q4DVF9_TRYCC	tr|Q4DVF9|Q4DVF9_TRYCC	18	3	2	>tr|Q4DVF9|Q4DVF9_TRYCC Uncharacterized protein OS=Trypanosoma cruzi (strain CL Brener) GN=Tc00.1047053506859.170 PE=4 SV=1	1	18	3	2	66	15	15	18	18	3	3	3	3	2	2	2	2	59.7	12.1	10.4	60462	536	536	1	69	0	129.99	By MS/MS	By MS/MS	By MS/MS	By MS/MS	By MS/MS	By MS/MS	54.1	54.1	52.1	54.1	59.7	59.7	5259300000	1035600000	828080000	828220000	1149300000
tr|Q4CLT3|Q4CLT3_TRYCC	tr|Q4CLT3|Q4CLT3_TRYCC	17	1	1	>tr|Q4CLT3|Q4CLT3_TRYCC Uncharacterized protein OS=Trypanosoma cruzi (strain CL Brener) GN=Tc00.1047053509129.10 PE=4 SV=1	1	17	1	1	66	17	16	16	17	1	1	1	1	1	1	1	1	64.7	8.1	8.1	29628	272	272	1	14	0	60659	By MS/MS	By matching	By MS/MS	By MS/MS	By MS/MS	By MS/MS	64.7	62.1	64.7	61.8	62.1	64.7	491170000	94077000	39689000	125880000	102420000
tr|Q4DD37|Q4DD37_TRYCC	tr|Q4DD37|Q4DD37_TRYCC	19	19	1	>tr|Q4DD37|Q4DD37_TRYCC Chaperonin alpha subunit, putative OS=Trypanosoma cruzi (strain CL Brener) GN=Tc00.1047053511025.70 PE=3 SV=1	1	19	19	1	65	15	16	16	18	15	16	16	18	1	1	1	1	45	45	2.2	59363	547	547	1	170	0	229.5	By MS/MS	By MS/MS	By MS/MS	By MS/MS	By MS/MS	By MS/MS	35.3	35.1	28.2	26.1	39.1	41.5	15744000000	2435100000	3085000000	2818600000	4671800000
tr|Q4D0F4|Q4D0F4_TRYCC	tr|Q4D0F4|Q4D0F4_TRYCC	19	1	1	>tr|Q4D0F4|Q4D0F4_TRYCC Chaperonin alpha subunit, putative OS=Trypanosoma cruzi (strain CL Brener) GN=Tc00.1047053511531.40 PE=3 SV=1	1	19	1	1	65	15	16	16	18	1	1	1	1	1	1	1	1	45	2.2	2.2	59391	547	547	1	12	0.002812	1.94	By MS/MS	By matching	By matching	By MS/MS	By MS/MS	By MS/MS	35.3	35.1	28.2	26.1	39.1	41.5	943130000	163390000	227660000	119060000	251370000
tr|Q4DG21|Q4DG21_TRYCC;tr|Q4DF37|Q4DF37_TRYCC;tr|Q4CXR9|Q4CXR9_TRYCC;tr|Q4CRX0|Q4CRX0_TRYCC;tr|Q4CRW9|Q4CRW9_TRYCC;tr|Q4E2W1|Q4E2W1_TRYCC;tr|Q4CYV4|Q4CYV4_TRYCC;tr|Q4D172|Q4D172_TRYCC	tr|Q4DG21|Q4DG21_TRYCC;tr|Q4DF37|Q4DF37_TRYCC;tr|Q4CXR9|Q4CXR9_TRYCC;tr|Q4CRX0|Q4CRX0_TRYCC;tr|Q4CRW9|Q4CRW9_TRYCC;tr|Q4E2W1|Q4E2W1_TRYCC;tr|Q4CYV4|Q4CYV4_TRYCC;tr|Q4D172|Q4D172_TRYCC	19;17;17;16;16;15;15;11	19;17;17;16;16;15;15;11	1;0;0;1;1;0;0;1	>tr|Q4DG21|Q4DG21_TRYCC Cystathionine beta-synthase, putative OS=Trypanosoma cruzi (strain CL Brener) GN=Tc00.1047053508241.140 PE=4 SV=1;>tr|Q4DF37|Q4DF37_TRYCC Cystathionine beta-synthase OS=Trypanosoma cruzi (strain CL Brener) GN=Tc00.1047053508177.120	8	19	19	1	64	14	16	17	17	14	16	17	17	0	0	0	1	51	51	4.9	42.05	384	384;384;384;396;427;401;427;303	1	284	0	223.01	By MS/MS	By MS/MS	By MS/MS	By MS/MS	By MS/MS	By MS/MS	38.8	44.5	34.9	34.1	43.2	43.5	33078000000	3987500000	5857100000	7248300000	11859000000
tr|Q4E4V0|Q4E4V0_TRYCC	tr|Q4E4V0|Q4E4V0_TRYCC	20	20	20	>tr|Q4E4V0|Q4E4V0_TRYCC Polyadenylate-binding protein OS=Trypanosoma cruzi (strain CL Brener) GN=Tc00.1047053508461.140 PE=3 SV=1	1	20	20	20	64	13	16	18	17	13	16	18	17	13	16	18	17	43.8	43.8	43.8	61.41	550	550	1	216	0	160.21	By MS/MS	By MS/MS	By MS/MS	By MS/MS	By MS/MS	By MS/MS	27.6	30.9	28.2	26.9	40	37.6	31644000000	3972000000	5477500000	6109800000	11398000000
tr|Q4DIM7|Q4DIM7_TRYCC;tr|Q4CMC1|Q4CMC1_TRYCC;tr|Q4CSH1|Q4CSH1_TRYCC	tr|Q4DIM7|Q4DIM7_TRYCC	21;5;1	21;5;1	21;5;1	>tr|Q4DIM7|Q4DIM7_TRYCC Calcium-transporting ATPase OS=Trypanosoma cruzi (strain CL Brener) GN=Tc00.1047053509777.70 PE=3 SV=1	3	21	21	21	64	15	13	17	19	15	13	17	19	15	13	17	19	25.3	25.3	25.3	109.65	1006	1006;181;248	1	199	0	138.48	By MS/MS	By MS/MS	By MS/MS	By MS/MS	By MS/MS	By MS/MS	19.3	15.8	16.9	16	21.8	24.5	8664500000	1316400000	1686500000	1420800000	2741200000
tr|Q4DKH4|Q4DKH4_TRYCC	tr|Q4DKH4|Q4DKH4_TRYCC	17	2	2	>tr|Q4DKH4|Q4DKH4_TRYCC Vacuolar-type proton translocating pyrophosphatase 1, putative OS=Trypanosoma cruzi (strain CL Brener) GN=Tc00.1047053511385.30 PE=3 SV=1	1	17	2	2	64	16	16	17	15	1	1	2	1	1	1	2	1	26.2	6.3	6.3	85265	814	814	1	13	0.0018242	21794	By MS/MS	By matching	By matching	By matching	By MS/MS	By matching	21.1	21.1	26.2	21.1	26.2	21.1	300090000	106150000	38182000	56592000	47274000
tr|Q4DNQ7|Q4DNQ7_TRYCC;tr|Q4D455|Q4D455_TRYCC	tr|Q4DNQ7|Q4DNQ7_TRYCC;tr|Q4D455|Q4D455_TRYCC	19;19	19;19	19;19	>tr|Q4DNQ7|Q4DNQ7_TRYCC Adenosylhomocysteinase OS=Trypanosoma cruzi (strain CL Brener) GN=Tc00.1047053511589.200 PE=3 SV=1;>tr|Q4D455|Q4D455_TRYCC Adenosylhomocysteinase OS=Trypanosoma cruzi (strain CL Brener) GN=Tc00.1047053511229.50 PE=3 SV=1	2	19	19	19	63	14	15	15	19	14	15	15	19	14	15	15	19	46.2	46.2	46.2	48462	437	437;437	1	288	0	323.31	By MS/MS	By MS/MS	By MS/MS	By MS/MS	By MS/MS	By MS/MS	36.8	41.2	36.8	36.8	39.4	46.2	42788000000	7200200000	11809000000	6172800000	11518000000
tr|Q4D6H2|Q4D6H2_TRYCC	tr|Q4D6H2|Q4D6H2_TRYCC	18	18	18	>tr|Q4D6H2|Q4D6H2_TRYCC Methionyl-tRNA synthetase, putative OS=Trypanosoma cruzi (strain CL Brener) GN=Tc00.1047053509247.50 PE=3 SV=1	1	18	18	18	63	13	15	18	17	13	15	18	17	13	15	18	17	30.7	30.7	30.7	86116	765	765	1	213	0	127.77	By MS/MS	By MS/MS	By MS/MS	By MS/MS	By MS/MS	By MS/MS	22.9	24.7	22.9	20.7	30.7	29.7	12348000000	2009600000	2614900000	2028900000	3723800000
tr|Q4CMU8|Q4CMU8_TRYCC;tr|Q4CL36|Q4CL36_TRYCC	tr|Q4CMU8|Q4CMU8_TRYCC	19;1	19;1	2;0	>tr|Q4CMU8|Q4CMU8_TRYCC NADH-dependent fumarate reductase, putative OS=Trypanosoma cruzi (strain CL Brener) GN=Tc00.1047053510215.10 PE=4 SV=1	2	19	19	2	63	13	15	18	17	13	15	18	17	1	1	2	2	21.5	21.5	2.7	124.79	1142	1142;142	1	214	0	109.04	By MS/MS	By MS/MS	By MS/MS	By MS/MS	By MS/MS	By MS/MS	13.8	17	15.1	15.1	20.1	19.2	12743000000	2358200000	2646000000	1854600000	3227700000
tr|Q4DBK5|Q4DBK5_TRYCC	tr|Q4DBK5|Q4DBK5_TRYCC	20	20	6	>tr|Q4DBK5|Q4DBK5_TRYCC Peptidase M20/M25/M40, putative OS=Trypanosoma cruzi (strain CL Brener) GN=Tc00.1047053510257.80 PE=4 SV=1	1	20	20	6	61	13	10	19	19	13	10	19	19	4	2	6	5	51.5	51.5	21.9	51199	474	474	1	254	0	291.12	By MS/MS	By MS/MS	By MS/MS	By MS/MS	By MS/MS	By MS/MS	35.9	26.6	33.5	26.6	51.5	44.5	56884000000	9194100000	10108000000	9001500000	16792000000
tr|Q4E4E7|Q4E4E7_TRYCC;tr|Q4DPG7|Q4DPG7_TRYCC;tr|Q4CLF2|Q4CLF2_TRYCC;tr|Q4CP11|Q4CP11_TRYCC	tr|Q4E4E7|Q4E4E7_TRYCC;tr|Q4DPG7|Q4DPG7_TRYCC	18;12;5;2	18;12;5;2	1;0;0;0	>tr|Q4E4E7|Q4E4E7_TRYCC Tyrosine aminotransferase OS=Trypanosoma cruzi (strain CL Brener) GN=Tc00.1047053510187.30 PE=4 SV=1;>tr|Q4DPG7|Q4DPG7_TRYCC Tyrosine aminotransferase, putative (Fragment) OS=Trypanosoma cruzi (strain CL Brener) GN=Tc00.104705351056	4	18	18	1	61	13	13	17	18	13	13	17	18	1	1	1	1	61.5	61.5	5	46152	416	416;252;62;59	1	438	0	323.31	By MS/MS	By MS/MS	By MS/MS	By MS/MS	By MS/MS	By MS/MS	36.8	35.6	36.3	40.9	53.4	61.5	56116000000	9882300000	10789000000	8178500000	14377000000
tr|Q4DIF6|Q4DIF6_TRYCC;tr|Q4D0N7|Q4D0N7_TRYCC	tr|Q4DIF6|Q4DIF6_TRYCC;tr|Q4D0N7|Q4D0N7_TRYCC	19;10	19;10	13;4	>tr|Q4DIF6|Q4DIF6_TRYCC 69 kDa paraflagellar rod protein, putative OS=Trypanosoma cruzi (strain CL Brener) GN=Tc00.1047053511215.119 PE=4 SV=1;>tr|Q4D0N7|Q4D0N7_TRYCC 69 kDa paraflagellar rod protein, putative (Fragment) OS=Trypanosoma cruzi (strain CL Bre	2	19	19	13	61	12	16	17	16	12	16	17	16	9	11	12	12	44.2	44.2	29.2	69561	600	600;359	1	232	0	155.84	By MS/MS	By MS/MS	By MS/MS	By MS/MS	By MS/MS	By MS/MS	33.5	38.2	33.2	36.3	41.3	36.7	16233000000	2387400000	3304100000	2471600000	4279800000
tr|Q4E349|Q4E349_TRYCC	tr|Q4E349|Q4E349_TRYCC	17	5	3	>tr|Q4E349|Q4E349_TRYCC Uncharacterized protein OS=Trypanosoma cruzi (strain CL Brener) GN=Tc00.1047053508741.229 PE=4 SV=1	1	17	5	3	61	16	14	15	16	4	3	4	4	2	2	2	3	74.3	29.8	22.4	29636	272	272	1	44	0	40518	By MS/MS	By MS/MS	By MS/MS	By MS/MS	By MS/MS	By MS/MS	64.3	57.7	64.3	61.4	67.3	70.2	3203100000	622860000	765420000	300570000	553330000
tr|Q4DP96|Q4DP96_TRYCC	tr|Q4DP96|Q4DP96_TRYCC	17	17	7	>tr|Q4DP96|Q4DP96_TRYCC Phenylalanyl-tRNA synthetase, putative OS=Trypanosoma cruzi (strain CL Brener) GN=Tc00.1047053506127.30 PE=4 SV=1	1	17	17	7	61	15	16	15	15	15	16	15	15	6	7	6	6	31.2	31.2	14.7	70821	625	625	1	179	0	163.33	By MS/MS	By MS/MS	By MS/MS	By MS/MS	By MS/MS	By MS/MS	29.3	28.5	25	19.7	31.2	28	7488300000	1314400000	1587800000	1277300000	2327400000
tr|Q4CPZ0|Q4CPZ0_TRYCC;tr|Q4E2Z4|Q4E2Z4_TRYCC;REV__tr|Q4D838|Q4D838_TRYCC;tr|Q4DAU2|Q4DAU2_TRYCC	tr|Q4CPZ0|Q4CPZ0_TRYCC	17;1;1;1	5;1;1;1	5;1;1;1	>tr|Q4CPZ0|Q4CPZ0_TRYCC Calreticulin, putative OS=Trypanosoma cruzi (strain CL Brener) GN=Tc00.1047053510685.10 PE=1 SV=1	4	17	5	5	61	14	16	15	16	4	5	4	5	4	5	4	5	46.9	9.2	9.2	46234	401	401;181;339;1165	1	59	0	55713	By MS/MS	By MS/MS	By MS/MS	By MS/MS	By MS/MS	By MS/MS	43.1	44.6	45.1	43.1	43.1	46.9	4441200000	866720000	1073600000	495380000	717640000
tr|Q4E573|Q4E573_TRYCC	tr|Q4E573|Q4E573_TRYCC	22	22	22	>tr|Q4E573|Q4E573_TRYCC Uncharacterized protein OS=Trypanosoma cruzi (strain CL Brener) GN=Tc00.1047053506559.550 PE=4 SV=1	1	22	22	22	61	14	13	17	17	14	13	17	17	14	13	17	17	26.4	26.4	26.4	108.75	934	934	1	194	0	106.87	By MS/MS	By MS/MS	By MS/MS	By MS/MS	By MS/MS	By MS/MS	17.6	17.1	17.9	16.4	23.4	22.5	7446600000	1074700000	1497000000	1209000000	1874700000
tr|Q4CXQ1|Q4CXQ1_TRYCC;tr|Q4CNM6|Q4CNM6_TRYCC	tr|Q4CXQ1|Q4CXQ1_TRYCC	19;3	13;2	3;0	>tr|Q4CXQ1|Q4CXQ1_TRYCC Retrotransposon hot spot (RHS) protein, putative OS=Trypanosoma cruzi (strain CL Brener) GN=Tc00.1047053509219.20 PE=4 SV=1	2	19	13	3	61	14	15	16	16	9	10	10	12	2	2	3	2	22	15.1	3.3	139.3	1210	1210;108	1	100	0	61564	By MS/MS	By MS/MS	By MS/MS	By MS/MS	By MS/MS	By MS/MS	15.8	16.9	14.5	13.3	20.5	19.2	4180600000	674390000	908860000	634300000	1141900000
tr|Q4DW49|Q4DW49_TRYCC	tr|Q4DW49|Q4DW49_TRYCC	16	16	6	>tr|Q4DW49|Q4DW49_TRYCC Succinate--CoA ligase [ADP-forming] subunit beta, mitochondrial OS=Trypanosoma cruzi (strain CL Brener) GN=Tc00.1047053507681.20 PE=3 SV=1	1	16	16	6	60	14	14	16	16	14	14	16	16	6	6	6	6	42.8	42.8	14.8	45265	418	418	1	301	0	240.55	By MS/MS	By MS/MS	By MS/MS	By MS/MS	By MS/MS	By MS/MS	36.1	36.1	33	33	42.8	42.8	38038000000	6516000000	8333700000	6003700000	10297000000
tr|Q4E4R8|Q4E4R8_TRYCC	tr|Q4E4R8|Q4E4R8_TRYCC	21	21	21	>tr|Q4E4R8|Q4E4R8_TRYCC T-complex protein 1, eta subunit, putative OS=Trypanosoma cruzi (strain CL Brener) GN=Tc00.1047053508461.410 PE=3 SV=1	1	21	21	21	60	12	11	19	18	12	11	19	18	12	11	19	18	52.1	52.1	52.1	61.4	568	568	1	186	0	312.68	By MS/MS	By MS/MS	By MS/MS	By MS/MS	By MS/MS	By MS/MS	34.9	31.3	36.8	22.5	48.2	48.9	14458000000	1991300000	2645900000	3017300000	4451600000
tr|Q4DGX6|Q4DGX6_TRYCC	tr|Q4DGX6|Q4DGX6_TRYCC	19	5	5	>tr|Q4DGX6|Q4DGX6_TRYCC Peptidase M20/M25/M40, putative OS=Trypanosoma cruzi (strain CL Brener) GN=Tc00.1047053509213.120 PE=4 SV=1	1	19	5	5	60	13	11	18	18	4	3	5	4	4	3	5	4	49.2	19.6	19.6	51.28	474	474	1	61	0	126.07	By MS/MS	By MS/MS	By MS/MS	By MS/MS	By MS/MS	By MS/MS	33.8	31	31	31	49.2	42.2	7462000000	960940000	1139500000	1653000000	2552900000
tr|Q4CRM5|Q4CRM5_TRYCC	tr|Q4CRM5|Q4CRM5_TRYCC	21	19	12	>tr|Q4CRM5|Q4CRM5_TRYCC Retrotransposon hot spot (RHS) protein, putative (Fragment) OS=Trypanosoma cruzi (strain CL Brener) GN=Tc00.1047053509917.19 PE=4 SV=1	1	21	19	12	60	11	14	19	16	9	12	17	14	5	8	10	8	41.3	39.2	28.8	69903	605	605	1	139	0	149.86	By MS/MS	By MS/MS	By MS/MS	By MS/MS	By MS/MS	By MS/MS	19.5	26.1	19.2	23.1	38	32.2	6660100000	862490000	1444300000	1083900000	1952100000
tr|Q4E4Q2|Q4E4Q2_TRYCC;tr|Q4CR48|Q4CR48_TRYCC	tr|Q4E4Q2|Q4E4Q2_TRYCC;tr|Q4CR48|Q4CR48_TRYCC	15;15	15;15	1;1	>tr|Q4E4Q2|Q4E4Q2_TRYCC Gim5A protein, putative OS=Trypanosoma cruzi (strain CL Brener) GN=Tc00.1047053508461.570 PE=4 SV=1;>tr|Q4CR48|Q4CR48_TRYCC Gim5A protein, putative OS=Trypanosoma cruzi (strain CL Brener) GN=Tc00.1047053510669.20 PE=4 SV=1	2	15	15	1	59	15	14	15	15	15	14	15	15	1	1	1	1	62.3	62.3	5.7	26605	244	244;244	1	324	0	229.42	By MS/MS	By MS/MS	By MS/MS	By MS/MS	By MS/MS	By MS/MS	62.3	62.3	58.6	54.9	62.3	62.3	146200000000	31261000000	44978000000	17407000000	23891000000
tr|Q4DAZ6|Q4DAZ6_TRYCC;tr|Q4CWF4|Q4CWF4_TRYCC	tr|Q4DAZ6|Q4DAZ6_TRYCC;tr|Q4CWF4|Q4CWF4_TRYCC	15;13	13;11	13;11	>tr|Q4DAZ6|Q4DAZ6_TRYCC Heat shock 70 kDa protein, putative (Fragment) OS=Trypanosoma cruzi (strain CL Brener) GN=Tc00.1047053506135.9 PE=3 SV=1;>tr|Q4CWF4|Q4CWF4_TRYCC Heat shock 70 kDa protein, putative (Fragment) OS=Trypanosoma cruzi (strain CL Brener)	2	15	13	13	59	15	14	15	15	13	12	13	13	13	12	13	13	57.5	47.6	47.6	30147	273	273;223	1	227	0	134.48	By MS/MS	By MS/MS	By MS/MS	By MS/MS	By MS/MS	By MS/MS	57.5	52.7	52.4	52.4	57.5	57.5	33144000000	5370100000	6514600000	5146600000	9150300000
tr|Q4D832|Q4D832_TRYCC	tr|Q4D832|Q4D832_TRYCC	19	19	19	>tr|Q4D832|Q4D832_TRYCC Heat shock protein DnaJ, putative OS=Trypanosoma cruzi (strain CL Brener) GN=Tc00.1047053511627.110 PE=3 SV=1	1	19	19	19	59	12	11	18	18	12	11	18	18	12	11	18	18	50.4	50.4	50.4	44204	399	399	1	177	0	232.38	By MS/MS	By MS/MS	By MS/MS	By MS/MS	By MS/MS	By MS/MS	33.3	32.8	32.8	35.1	48.1	50.4	11783000000	1390300000	1603300000	2514400000	4387400000
tr|Q4DWP4|Q4DWP4_TRYCC	tr|Q4DWP4|Q4DWP4_TRYCC	18	18	18	>tr|Q4DWP4|Q4DWP4_TRYCC Uncharacterized protein OS=Trypanosoma cruzi (strain CL Brener) GN=Tc00.1047053511421.200 PE=4 SV=1	1	18	18	18	59	14	12	16	17	14	12	16	17	14	12	16	17	21.7	21.7	21.7	122.57	1076	1076	1	166	0	87797	By MS/MS	By MS/MS	By MS/MS	By MS/MS	By MS/MS	By MS/MS	15.6	13.7	13.4	13.1	19.2	20.9	4849900000	814780000	1146500000	804110000	1294600000
tr|Q4DF38|Q4DF38_TRYCC	tr|Q4DF38|Q4DF38_TRYCC	17	1	1	>tr|Q4DF38|Q4DF38_TRYCC Cystathionine beta-synthase OS=Trypanosoma cruzi (strain CL Brener) GN=Tc00.1047053508177.110 PE=4 SV=1	1	17	1	1	59	13	15	16	15	1	1	1	1	1	1	1	1	43	4.4	4.4	42091	384	384	1	19	0	23201	By MS/MS	By MS/MS	By MS/MS	By MS/MS	By MS/MS	By MS/MS	35.7	41.4	31.8	33.9	40.1	35.4	965960000	96246000	143610000	304090000	367700000
tr|Q4DC12|Q4DC12_TRYCC	tr|Q4DC12|Q4DC12_TRYCC	15	1	1	>tr|Q4DC12|Q4DC12_TRYCC Gim5A protein, putative OS=Trypanosoma cruzi (strain CL Brener) GN=Tc00.1047053507009.10 PE=4 SV=1	1	15	1	1	59	15	14	15	15	1	1	1	1	1	1	1	1	67.7	6.6	6.6	24525	226	226	1	7	1	-2	By MS/MS	By matching	By matching	By matching	By matching	By MS/MS	67.7	67.7	63.7	59.7	67.7	67.7	106020000	18070000	44814000	23353000	0
tr|Q4E5I9|Q4E5I9_TRYCC	tr|Q4E5I9|Q4E5I9_TRYCC	16	16	1	>tr|Q4E5I9|Q4E5I9_TRYCC Alcohol dehydrogenase, putative OS=Trypanosoma cruzi (strain CL Brener) GN=Tc00.1047053511277.60 PE=4 SV=1	1	16	16	1	58	14	15	14	15	14	15	14	15	1	1	1	1	42.6	42.6	3.6	41759	392	392	1	264	0	257.48	By MS/MS	By MS/MS	By MS/MS	By MS/MS	By MS/MS	By MS/MS	37	39.5	39.3	42.1	40.3	39.5	42414000000	7372000000	9907900000	4151300000	6299600000
tr|Q4CU52|Q4CU52_TRYCC	tr|Q4CU52|Q4CU52_TRYCC	16	4	4	>tr|Q4CU52|Q4CU52_TRYCC D-isomer specific 2-hydroxyacid dehydrogenase-protein, putative (Fragment) OS=Trypanosoma cruzi (strain CL Brener) GN=Tc00.1047053506263.10 PE=4 SV=1	1	16	4	4	58	15	14	15	14	4	4	4	4	4	4	4	4	55.3	12.6	12.6	28534	253	253	1	46	0	38.77	By MS/MS	By MS/MS	By MS/MS	By MS/MS	By MS/MS	By MS/MS	53.8	50.2	48.6	48.6	53.8	53.8	10157000000	2047400000	2630900000	1438000000	2677800000
tr|Q4CLR4|Q4CLR4_TRYCC	tr|Q4CLR4|Q4CLR4_TRYCC	18	18	4	>tr|Q4CLR4|Q4CLR4_TRYCC Uncharacterized protein (Fragment) OS=Trypanosoma cruzi (strain CL Brener) GN=Tc00.1047053511519.9 PE=4 SV=1	1	18	18	4	58	13	13	16	16	13	13	16	16	4	3	4	3	47.2	47.2	3.9	45589	407	407	1	166	0	234.34	By MS/MS	By MS/MS	By MS/MS	By MS/MS	By MS/MS	By MS/MS	34.2	36.6	28.3	33.7	43.2	45.2	12098000000	1837800000	2353000000	2393200000	3644600000
tr|Q4CYI1|Q4CYI1_TRYCC;tr|Q4CP88|Q4CP88_TRYCC	tr|Q4CYI1|Q4CYI1_TRYCC	19;3	19;3	19;3	>tr|Q4CYI1|Q4CYI1_TRYCC Uncharacterized protein OS=Trypanosoma cruzi (strain CL Brener) GN=Tc00.1047053510797.30 PE=4 SV=1	2	19	19	19	58	13	12	17	16	13	12	17	16	13	12	17	16	31.9	31.9	31.9	87102	759	759;248	1	194	0	134.25	By MS/MS	By MS/MS	By MS/MS	By MS/MS	By MS/MS	By MS/MS	23.7	19.5	26.2	23.6	30.2	27.5	9076900000	1475600000	1868200000	1417100000	2358300000
tr|Q4D0K9|Q4D0K9_TRYCC;tr|Q4DYM1|Q4DYM1_TRYCC	tr|Q4D0K9|Q4D0K9_TRYCC;tr|Q4DYM1|Q4DYM1_TRYCC	19;18	19;18	19;18	>tr|Q4D0K9|Q4D0K9_TRYCC Ubiquitin-activating enzyme E1, putative OS=Trypanosoma cruzi (strain CL Brener) GN=Tc00.1047053508043.30 PE=3 SV=1;>tr|Q4DYM1|Q4DYM1_TRYCC Ubiquitin-activating enzyme E1, putative OS=Trypanosoma cruzi (strain CL Brener) GN=Tc00.104	2	19	19	19	58	13	14	16	15	13	14	16	15	13	14	16	15	25	25	25	114.4	1038	1038;1038	1	162	0	255.14	By MS/MS	By MS/MS	By MS/MS	By MS/MS	By MS/MS	By MS/MS	15.3	18.3	20.9	17.5	21.9	22.6	8428000000	1295900000	2195500000	1302800000	2279400000
tr|Q4CRR1|Q4CRR1_TRYCC	tr|Q4CRR1|Q4CRR1_TRYCC	18	18	4	>tr|Q4CRR1|Q4CRR1_TRYCC Uncharacterized protein OS=Trypanosoma cruzi (strain CL Brener) GN=Tc00.1047053508083.10 PE=4 SV=1	1	18	18	4	58	13	11	17	17	13	11	17	17	1	1	4	4	41.5	41.5	10.8	65088	591	591	1	197	0	132.06	By MS/MS	By MS/MS	By MS/MS	By MS/MS	By MS/MS	By MS/MS	31.3	27.2	21.7	25	39.1	39.1	8069300000	1095100000	1437800000	1506600000	2650500000
tr|Q4DY23|Q4DY23_TRYCC	tr|Q4DY23|Q4DY23_TRYCC	16	1	1	>tr|Q4DY23|Q4DY23_TRYCC Alcohol dehydrogenase, putative OS=Trypanosoma cruzi (strain CL Brener) GN=Tc00.1047053506357.50 PE=4 SV=1	1	16	1	1	58	14	15	14	15	1	1	1	1	1	1	1	1	42.6	3.6	3.6	41796	392	392	1	15	0.0039683	15709	By matching	By matching	By MS/MS	By MS/MS	By matching	By MS/MS	37	39.5	39.3	42.1	40.3	39.5	1396000000	225420000	434010000	67691000	267860000
tr|Q4D5Z5|Q4D5Z5_TRYCC	tr|Q4D5Z5|Q4D5Z5_TRYCC	18	4	4	>tr|Q4D5Z5|Q4D5Z5_TRYCC Uncharacterized protein OS=Trypanosoma cruzi (strain CL Brener) GN=Tc00.1047053511737.10 PE=4 SV=1	1	18	4	4	58	12	13	16	17	3	3	4	4	3	3	4	4	46.4	3.9	3.9	46135	414	414	1	45	0	24711	By MS/MS	By MS/MS	By MS/MS	By MS/MS	By MS/MS	By MS/MS	33.6	36	27.3	33.1	42.5	44.4	1391100000	247280000	262340000	205540000	402230000
tr|Q4DDX3|Q4DDX3_TRYCC	tr|Q4DDX3|Q4DDX3_TRYCC	18	18	6	>tr|Q4DDX3|Q4DDX3_TRYCC Calreticulin, putative OS=Trypanosoma cruzi (strain CL Brener) GN=Tc00.1047053509011.40 PE=3 SV=1	1	18	18	6	57	14	15	14	14	14	15	14	14	4	4	3	3	47.4	47.4	9.7	46211	401	401	1	260	0	323.31	By MS/MS	By MS/MS	By MS/MS	By MS/MS	By MS/MS	By MS/MS	43.1	42.9	45.1	45.4	43.1	45.1	13836000000	2210700000	3474000000	2040600000	3249500000
tr|Q4E5G5|Q4E5G5_TRYCC	tr|Q4E5G5|Q4E5G5_TRYCC	15	15	15	>tr|Q4E5G5|Q4E5G5_TRYCC Aconitate hydratase OS=Trypanosoma cruzi (strain CL Brener) GN=Tc00.1047053511277.290 PE=3 SV=1	1	15	15	15	57	13	15	15	14	13	15	15	14	13	15	15	14	20.6	20.6	20.6	98705	898	898	1	188	0	104.42	By MS/MS	By MS/MS	By MS/MS	By MS/MS	By MS/MS	By MS/MS	17.5	20.6	17.3	15.1	20.6	19.8	17517000000	3153200000	4082500000	2540400000	4380000000
tr|Q4DQS9|Q4DQS9_TRYCC;REV__tr|Q4DL87|Q4DL87_TRYCC;REV__tr|Q4DSM6|Q4DSM6_TRYCC	tr|Q4DQS9|Q4DQS9_TRYCC	19;1;1	19;1;1	7;0;0	>tr|Q4DQS9|Q4DQS9_TRYCC Uncharacterized protein (Fragment) OS=Trypanosoma cruzi (strain CL Brener) GN=Tc00.1047053511821.179 PE=4 SV=1	3	19	19	7	57	14	15	15	13	14	15	15	13	4	5	5	5	53.2	53.2	26.7	143.83	1238	1238;1132;1141	1	242	0	323.31	By MS/MS	By MS/MS	By MS/MS	By MS/MS	By MS/MS	By MS/MS	47.8	49	47.6	46.8	50.2	49	36495000000	5994100000	8519700000	4062100000	7293900000
tr|Q4DB63|Q4DB63_TRYCC	tr|Q4DB63|Q4DB63_TRYCC	17	17	4	>tr|Q4DB63|Q4DB63_TRYCC Mitochondrial processing peptidase alpha subunit, putative OS=Trypanosoma cruzi (strain CL Brener) GN=Tc00.1047053506735.10 PE=4 SV=1	1	17	17	4	57	13	16	14	14	13	16	14	14	4	4	4	4	43.1	43.1	10.3	61248	552	552	1	227	0	155.55	By MS/MS	By MS/MS	By MS/MS	By MS/MS	By MS/MS	By MS/MS	34.1	40.4	43.1	40.4	36.4	33.3	12088000000	1501400000	2510700000	1556900000	2908500000
tr|Q4DQY7|Q4DQY7_TRYCC	tr|Q4DQY7|Q4DQY7_TRYCC	18	18	1	>tr|Q4DQY7|Q4DQY7_TRYCC Acetyl-coenzyme A synthetase OS=Trypanosoma cruzi (strain CL Brener) GN=Tc00.1047053509331.30 PE=3 SV=1	1	18	18	1	57	13	11	17	16	13	11	17	16	1	1	1	1	33.4	33.4	4.3	75191	677	677	1	198	0	177.09	By MS/MS	By MS/MS	By MS/MS	By MS/MS	By MS/MS	By MS/MS	23.5	20.7	18.3	20.4	31.6	29.5	11989000000	1123200000	1959900000	2524500000	4361500000
tr|Q4DHQ7|Q4DHQ7_TRYCC	tr|Q4DHQ7|Q4DHQ7_TRYCC	18	18	5	>tr|Q4DHQ7|Q4DHQ7_TRYCC ABC transporter, putative OS=Trypanosoma cruzi (strain CL Brener) GN=Tc00.1047053510149.80 PE=4 SV=1	1	18	18	5	57	15	15	14	13	15	15	14	13	4	5	5	2	14.7	14.7	4.8	206.56	1865	1865	1	186	0	57124	By MS/MS	By MS/MS	By MS/MS	By MS/MS	By MS/MS	By MS/MS	11.4	12.8	8.9	11.2	11.8	9.7	8956100000	2019400000	3163500000	948810000	1684100000
tr|Q4CVI0|Q4CVI0_TRYCC	tr|Q4CVI0|Q4CVI0_TRYCC	16	1	0	>tr|Q4CVI0|Q4CVI0_TRYCC Tyrosine aminotransferase OS=Trypanosoma cruzi (strain CL Brener) GN=Tc00.1047053510795.10 PE=4 SV=1	1	16	1	0	57	13	12	16	16	1	1	1	1	0	0	0	0	49.3	5	0	46268	416	416	1	9	0	27351	By matching	By MS/MS	By MS/MS	By matching	By MS/MS	By MS/MS	36.8	31.5	32.2	31.7	49.3	49.3	361680000	12267000	22080000	167350000	159980000
tr|Q4DXG9|Q4DXG9_TRYCC	tr|Q4DXG9|Q4DXG9_TRYCC	15	4	4	>tr|Q4DXG9|Q4DXG9_TRYCC Heat shock 70 kDa protein, mitochondrial, putative (Fragment) OS=Trypanosoma cruzi (strain CL Brener) GN=Tc00.1047053506941.280 PE=4 SV=1	1	15	4	4	56	15	14	14	13	4	4	3	2	4	4	3	2	64.3	25	25	18536	168	168	1	50	0	207.02	By MS/MS	By MS/MS	By MS/MS	By MS/MS	By MS/MS	By MS/MS	64.3	64.3	60.7	64.3	63.7	60.7	3207400000	498470000	654440000	442400000	874630000
tr|Q4DE37|Q4DE37_TRYCC;tr|Q4DLW4|Q4DLW4_TRYCC	tr|Q4DE37|Q4DE37_TRYCC	16;1	15;1	15;1	>tr|Q4DE37|Q4DE37_TRYCC Plasma membrane ATPase OS=Trypanosoma cruzi (strain CL Brener) GN=Tc00.1047053506649.20 PE=3 SV=1	2	16	15	15	56	13	13	15	15	12	12	14	14	12	12	14	14	26.4	25.5	25.5	99607	898	898;251	1	153	0	74791	By MS/MS	By MS/MS	By MS/MS	By MS/MS	By MS/MS	By MS/MS	21	18	17.7	21	25.3	25.2	6809300000	1258900000	1743100000	952720000	1491000000
tr|Q4DW89|Q4DW89_TRYCC;tr|Q4D7V0|Q4D7V0_TRYCC;tr|Q4D253|Q4D253_TRYCC	tr|Q4DW89|Q4DW89_TRYCC	19;5;4	19;5;4	19;5;4	>tr|Q4DW89|Q4DW89_TRYCC Lipophosphoglycan biosynthetic protein, putative OS=Trypanosoma cruzi (strain CL Brener) GN=Tc00.1047053506989.190 PE=3 SV=1	3	19	19	19	56	9	11	19	17	9	11	19	17	9	11	19	17	32	32	32	87021	762	762;235;319	1	148	0	80278	By MS/MS	By MS/MS	By MS/MS	By MS/MS	By MS/MS	By MS/MS	13.1	16.1	8.5	8.5	32	27.3	8190500000	932980000	1258700000	1911900000	3122800000
tr|Q4DM53|Q4DM53_TRYCC;tr|Q4CS64|Q4CS64_TRYCC	tr|Q4DM53|Q4DM53_TRYCC	20;5	20;5	20;5	>tr|Q4DM53|Q4DM53_TRYCC Uncharacterized protein OS=Trypanosoma cruzi (strain CL Brener) GN=Tc00.1047053506425.40 PE=4 SV=1	2	20	20	20	56	10	11	16	19	10	11	16	19	10	11	16	19	29	29	29	118.2	1067	1067;265	1	160	0	229.51	By MS/MS	By MS/MS	By MS/MS	By MS/MS	By MS/MS	By MS/MS	14.2	15.4	11	14.2	23.2	27.8	7635100000	1017300000	1196500000	1529300000	2778300000
tr|Q4CRN7|Q4CRN7_TRYCC	tr|Q4CRN7|Q4CRN7_TRYCC	16	16	4	>tr|Q4CRN7|Q4CRN7_TRYCC R27-2 protein, putative OS=Trypanosoma cruzi (strain CL Brener) GN=Tc00.1047053510247.10 PE=4 SV=1	1	16	16	4	56	14	12	14	16	14	12	14	16	4	3	4	4	36.7	36.7	6.7	181.22	1597	1597	1	151	0	49384	By MS/MS	By MS/MS	By MS/MS	By MS/MS	By MS/MS	By MS/MS	34.2	29.2	32.9	30.4	34.3	36.7	14169000000	2947400000	3188800000	1426500000	2352800000
tr|Q4D590|Q4D590_TRYCC	tr|Q4D590|Q4D590_TRYCC	17	17	17	>tr|Q4D590|Q4D590_TRYCC Mitochondrial oligo_U binding protein TBRGG1, putative OS=Trypanosoma cruzi (strain CL Brener) GN=Tc00.1047053507927.20 PE=4 SV=1	1	17	17	17	56	12	13	15	16	12	13	15	16	12	13	15	16	39.3	39.3	39.3	97264	889	889	1	147	0	141.37	By MS/MS	By MS/MS	By MS/MS	By MS/MS	By MS/MS	By MS/MS	31.4	34.9	30.1	32.3	37.3	39.3	5097500000	765320000	860700000	1189200000	1554500000
tr|Q4DTG3|Q4DTG3_TRYCC	tr|Q4DTG3|Q4DTG3_TRYCC	15	1	1	>tr|Q4DTG3|Q4DTG3_TRYCC Uncharacterized protein OS=Trypanosoma cruzi (strain CL Brener) GN=Tc00.1047053508737.210 PE=4 SV=1	1	15	1	1	56	15	13	14	14	1	1	1	1	1	1	1	1	59.9	8.1	8.1	29641	272	272	1	17	0	63237	By matching	By MS/MS	By MS/MS	By MS/MS	By MS/MS	By MS/MS	59.9	53.3	59.9	57	57.4	55.9	716450000	112790000	129790000	109230000	211780000
tr|Q4DVF8|Q4DVF8_TRYCC	tr|Q4DVF8|Q4DVF8_TRYCC	16	2	1	>tr|Q4DVF8|Q4DVF8_TRYCC Uncharacterized protein OS=Trypanosoma cruzi (strain CL Brener) GN=Tc00.1047053506859.180 PE=4 SV=1	1	16	2	1	56	12	13	15	16	2	2	2	2	1	1	1	1	46.6	9.2	3	42813	371	371	1	28	0	31729	By MS/MS	By MS/MS	By MS/MS	By MS/MS	By MS/MS	By MS/MS	36.7	38.5	33.7	36.7	44.7	46.6	718340000	95081000	91741000	75850000	56756000
tr|Q4E501|Q4E501_TRYCC	tr|Q4E501|Q4E501_TRYCC	17	3	3	>tr|Q4E501|Q4E501_TRYCC Uncharacterized protein OS=Trypanosoma cruzi (strain CL Brener) GN=Tc00.1047053508873.420 PE=4 SV=1	1	17	3	3	56	13	11	16	16	1	1	3	3	1	1	3	3	41.2	10.5	10.5	65021	590	590	1	18	0	38491	By MS/MS	By MS/MS	By MS/MS	By matching	By MS/MS	By MS/MS	31.4	27.3	26.6	23.4	38.8	38.8	760450000	69732000	67588000	220090000	376720000
tr|Q4CYI3|Q4CYI3_TRYCC	tr|Q4CYI3|Q4CYI3_TRYCC	16	16	8	>tr|Q4CYI3|Q4CYI3_TRYCC 2-oxoglutarate dehydrogenase subunit, putative OS=Trypanosoma cruzi (strain CL Brener) GN=Tc00.1047053510797.10 PE=4 SV=1	1	16	16	8	55	13	13	15	14	13	13	15	14	7	7	8	7	21.4	21.4	11.1	113.64	1007	1007	1	195	0	161.27	By MS/MS	By MS/MS	By MS/MS	By MS/MS	By MS/MS	By MS/MS	18.5	18.5	19.9	16.3	20.1	18.9	6785500000	958960000	1180100000	1042800000	1582400000
tr|Q4DYN2|Q4DYN2_TRYCC	tr|Q4DYN2|Q4DYN2_TRYCC	18	1	1	>tr|Q4DYN2|Q4DYN2_TRYCC Acetyl-coenzyme A synthetase OS=Trypanosoma cruzi (strain CL Brener) GN=Tc00.1047053504427.110 PE=3 SV=1	1	18	1	1	55	12	10	17	16	0	0	1	1	0	0	1	1	33.4	4.3	4.3	75217	677	677	1	4	0	28203	By matching	By matching	By matching	By matching	By MS/MS	By MS/MS	19.2	16.4	18.3	20.4	31.6	29.5	345370000	0	0	165430000	179940000
tr|Q4CYQ8|Q4CYQ8_TRYCC;tr|Q4D7A6|Q4D7A6_TRYCC;tr|Q4CYQ7|Q4CYQ7_TRYCC	tr|Q4CYQ8|Q4CYQ8_TRYCC;tr|Q4D7A6|Q4D7A6_TRYCC;tr|Q4CYQ7|Q4CYQ7_TRYCC	15;13;8	15;13;8	8;8;8	>tr|Q4CYQ8|Q4CYQ8_TRYCC Actin, putative OS=Trypanosoma cruzi (strain CL Brener) GN=Tc00.1047053510571.30 PE=3 SV=1;>tr|Q4D7A6|Q4D7A6_TRYCC Actin, putative (Fragment) OS=Trypanosoma cruzi (strain CL Brener) GN=Tc00.1047053510127.79 PE=3 SV=1;>tr|Q4CYQ7|Q4CY	3	15	15	8	54	12	12	15	15	12	12	15	15	7	6	8	8	51.3	51.3	23.4	41968	376	376;341;114	1	225	0	323.31	By MS/MS	By MS/MS	By MS/MS	By MS/MS	By MS/MS	By MS/MS	41	40.7	29.5	30.1	51.3	51.3	26074000000	3623900000	5218600000	4692500000	8518700000
tr|Q4DSA0|Q4DSA0_TRYCC	tr|Q4DSA0|Q4DSA0_TRYCC	15	15	4	>tr|Q4DSA0|Q4DSA0_TRYCC Arginase, putative OS=Trypanosoma cruzi (strain CL Brener) GN=Tc00.1047053507031.90 PE=1 SV=1	1	15	15	4	54	15	14	13	12	15	14	13	12	4	4	4	2	64.3	64.3	22.4	33556	308	308	1	217	0	146.04	By MS/MS	By MS/MS	By MS/MS	By MS/MS	By MS/MS	By MS/MS	64.3	57.8	57.8	57.8	55.2	43.5	13175000000	2692700000	3825600000	958490000	1270100000
tr|Q4D0X5|Q4D0X5_TRYCC;tr|Q4DU92|Q4DU92_TRYCC	tr|Q4D0X5|Q4D0X5_TRYCC	15;5	15;5	8;5	>tr|Q4D0X5|Q4D0X5_TRYCC 6-phosphogluconate dehydrogenase, decarboxylating OS=Trypanosoma cruzi (strain CL Brener) GN=Tc00.1047053510663.70 PE=3 SV=1	2	15	15	8	54	12	12	15	15	12	12	15	15	6	6	8	8	32.3	32.3	14.3	52023	477	477;145	1	216	0	259.58	By MS/MS	By MS/MS	By MS/MS	By MS/MS	By MS/MS	By MS/MS	29.6	29.6	24.1	22.2	32.3	32.3	23301000000	3343900000	4532100000	3800900000	6939000000
tr|Q4D0V0|Q4D0V0_TRYCC;tr|Q4CNH6|Q4CNH6_TRYCC	tr|Q4D0V0|Q4D0V0_TRYCC;tr|Q4CNH6|Q4CNH6_TRYCC	16;9	16;9	11;9	>tr|Q4D0V0|Q4D0V0_TRYCC Uncharacterized protein OS=Trypanosoma cruzi (strain CL Brener) GN=Tc00.1047053508319.30 PE=4 SV=1;>tr|Q4CNH6|Q4CNH6_TRYCC Uncharacterized protein (Fragment) OS=Trypanosoma cruzi (strain CL Brener) GN=Tc00.1047053508785.4 PE=4 SV=1	2	16	16	11	54	12	14	12	16	12	14	12	16	11	10	10	11	37.5	37.5	30.1	47023	395	395;219	1	178	0	55416	By MS/MS	By MS/MS	By MS/MS	By MS/MS	By MS/MS	By MS/MS	32.4	34.9	34.7	34.7	32.2	37.5	12724000000	2191200000	2965100000	1478200000	2795200000
tr|Q4E2M9|Q4E2M9_TRYCC	tr|Q4E2M9|Q4E2M9_TRYCC	17	17	5	>tr|Q4E2M9|Q4E2M9_TRYCC Glucose-6-phosphate isomerase OS=Trypanosoma cruzi (strain CL Brener) GN=Tc00.1047053510889.221 PE=3 SV=1	1	17	17	5	54	11	14	14	15	11	14	14	15	3	3	3	4	33.4	33.4	10	68328	608	608	1	189	0	94863	By MS/MS	By MS/MS	By MS/MS	By MS/MS	By MS/MS	By MS/MS	22.2	24.5	19.7	24.3	28.3	27.5	9702500000	1405400000	2062800000	1722700000	2743300000
tr|Q4CNI1|Q4CNI1_TRYCC	tr|Q4CNI1|Q4CNI1_TRYCC	15	1	1	>tr|Q4CNI1|Q4CNI1_TRYCC Prostaglandin F2alpha synthase (Fragment) OS=Trypanosoma cruzi (strain CL Brener) GN=Tc00.1047053507617.9 PE=4 SV=1	1	15	1	1	54	13	13	13	15	1	1	1	1	1	1	1	1	56.2	4.3	4.3	28212	256	256	1	41	0	81211	By MS/MS	By MS/MS	By MS/MS	By MS/MS	By MS/MS	By MS/MS	43	43	39.1	39.5	47.7	56.2	2462200000	407550000	582860000	278150000	232960000
tr|Q4DR27|Q4DR27_TRYCC	tr|Q4DR27|Q4DR27_TRYCC	19	17	8	>tr|Q4DR27|Q4DR27_TRYCC Retrotransposon hot spot (RHS) protein, putative OS=Trypanosoma cruzi (strain CL Brener) GN=Tc00.1047053504109.200 PE=4 SV=1	1	19	17	8	54	11	11	17	15	9	9	15	13	4	5	7	7	23.3	19.5	10.9	124.47	1097	1097	1	130	0	86373	By MS/MS	By MS/MS	By MS/MS	By MS/MS	By MS/MS	By MS/MS	14	13.2	14.4	10.8	22.2	19.1	5396900000	828290000	989610000	1024500000	1493700000
tr|Q4CM56|Q4CM56_TRYCC;tr|Q4CVR5|Q4CVR5_TRYCC	tr|Q4CM56|Q4CM56_TRYCC;tr|Q4CVR5|Q4CVR5_TRYCC	15;14	15;14	3;3	>tr|Q4CM56|Q4CM56_TRYCC Tryparedoxin peroxidase, putative OS=Trypanosoma cruzi (strain CL Brener) GN=Tc00.1047053507259.10 PE=4 SV=1;>tr|Q4CVR5|Q4CVR5_TRYCC Tryparedoxin peroxidase, putative OS=Trypanosoma cruzi (strain CL Brener) GN=Tc00.1047053487507.10	2	15	15	3	53	12	13	15	13	12	13	15	13	3	3	3	3	80.9	80.9	10.6	22.39	199	199;199	1	214	0	166.34	By MS/MS	By MS/MS	By MS/MS	By MS/MS	By MS/MS	By MS/MS	52.3	65.8	41.7	38.7	80.9	66.3	127290000000	19255000000	28527000000	13960000000	33527000000
tr|Q4DJJ9|Q4DJJ9_TRYCC	tr|Q4DJJ9|Q4DJJ9_TRYCC	14	14	14	>tr|Q4DJJ9|Q4DJJ9_TRYCC Mitochondrial phosphate transporter, putative OS=Trypanosoma cruzi (strain CL Brener) GN=Tc00.1047053509551.30 PE=3 SV=1	1	14	14	14	53	13	13	14	13	13	13	14	13	13	13	14	13	52.5	52.5	52.5	34.36	316	316	1	197	0	171.32	By MS/MS	By MS/MS	By MS/MS	By MS/MS	By MS/MS	By MS/MS	52.2	52.2	52.2	52.5	52.5	49.1	27620000000	5156800000	6154700000	4036700000	6959000000
tr|Q4DI18|Q4DI18_TRYCC	tr|Q4DI18|Q4DI18_TRYCC	16	3	3	>tr|Q4DI18|Q4DI18_TRYCC Mitochondrial processing peptidase alpha subunit, putative OS=Trypanosoma cruzi (strain CL Brener) GN=Tc00.1047053509229.80 PE=4 SV=1	1	16	3	3	53	12	15	13	13	3	3	3	3	3	3	3	3	41.5	6.1	6.1	56903	511	511	1	31	0	36241	By MS/MS	By MS/MS	By MS/MS	By matching	By MS/MS	By MS/MS	31.7	38.6	41.5	38.6	34.2	30.9	1453200000	286300000	238940000	178920000	265020000
tr|Q4D5C2|Q4D5C2_TRYCC	tr|Q4D5C2|Q4D5C2_TRYCC	14	14	2	>tr|Q4D5C2|Q4D5C2_TRYCC Glutamate dehydrogenase OS=Trypanosoma cruzi (strain CL Brener) GN=Tc00.1047053508111.30 PE=3 SV=1	1	14	14	2	52	14	12	13	13	14	12	13	13	2	2	2	2	39.4	39.4	7.5	45056	416	416	1	343	0	323.31	By MS/MS	By MS/MS	By MS/MS	By MS/MS	By MS/MS	By MS/MS	39.4	34.4	30	33.4	37.7	37.7	112470000000	21189000000	27105000000	13786000000	25568000000
tr|Q4DTP7|Q4DTP7_TRYCC	tr|Q4DTP7|Q4DTP7_TRYCC	14	14	6	>tr|Q4DTP7|Q4DTP7_TRYCC Carboxypeptidase OS=Trypanosoma cruzi (strain CL Brener) GN=Tc00.1047053509695.210 PE=3 SV=1	1	14	14	6	52	12	12	14	14	12	12	14	14	4	4	6	6	44.6	44.6	16.5	51582	466	466	1	202	0	189.4	By MS/MS	By MS/MS	By MS/MS	By MS/MS	By MS/MS	By MS/MS	38	38	38	38	44.6	44.6	26498000000	3385700000	4474800000	4608000000	7984100000
tr|Q4CU61|Q4CU61_TRYCC;tr|Q4CU60|Q4CU60_TRYCC	tr|Q4CU61|Q4CU61_TRYCC;tr|Q4CU60|Q4CU60_TRYCC	14;13	14;13	14;13	>tr|Q4CU61|Q4CU61_TRYCC 60S ribosomal protein L5, putative OS=Trypanosoma cruzi (strain CL Brener) GN=Tc00.1047053509671.80 PE=1 SV=1;>tr|Q4CU60|Q4CU60_TRYCC 60S ribosomal protein L5, putative OS=Trypanosoma cruzi (strain CL Brener) GN=Tc00.1047053510765.7	2	14	14	14	52	12	13	14	13	12	13	14	13	12	13	14	13	31.4	31.4	31.4	34852	309	309;260	1	149	0	78814	By MS/MS	By MS/MS	By MS/MS	By MS/MS	By MS/MS	By MS/MS	27.5	28.2	28.2	25.2	31.4	31.4	19558000000	2077600000	2928000000	4964000000	7833200000
tr|Q4E151|Q4E151_TRYCC	tr|Q4E151|Q4E151_TRYCC	15	15	15	>tr|Q4E151|Q4E151_TRYCC Chaperonin, putative OS=Trypanosoma cruzi (strain CL Brener) GN=Tc00.1047053506247.50 PE=3 SV=1	1	15	15	15	52	12	12	14	14	12	12	14	14	12	12	14	14	31.1	31.1	31.1	58302	537	537	1	172	0	213.72	By MS/MS	By MS/MS	By MS/MS	By MS/MS	By MS/MS	By MS/MS	26.1	26.1	26.1	27.4	29.8	29.6	16448000000	2603500000	3743800000	2783200000	4298300000
tr|Q4DH94|Q4DH94_TRYCC;tr|Q4E024|Q4E024_TRYCC	tr|Q4DH94|Q4DH94_TRYCC;tr|Q4E024|Q4E024_TRYCC	16;15	16;15	15;14	>tr|Q4DH94|Q4DH94_TRYCC Mitochondrial DNA polymerase beta, putative OS=Trypanosoma cruzi (strain CL Brener) GN=Tc00.1047053503955.20 PE=4 SV=1;>tr|Q4E024|Q4E024_TRYCC Mitochondrial DNA polymerase beta, putative OS=Trypanosoma cruzi (strain CL Brener) GN=Tc	2	16	16	15	52	11	11	15	15	11	11	15	15	10	10	14	14	46.7	46.7	46.7	45567	403	403;403	1	159	0	68.23	By MS/MS	By MS/MS	By MS/MS	By MS/MS	By MS/MS	By MS/MS	30	29.5	29	32	44.2	44.7	14494000000	2429100000	3239600000	2437300000	3606000000
tr|Q4DYE0|Q4DYE0_TRYCC	tr|Q4DYE0|Q4DYE0_TRYCC	15	15	15	>tr|Q4DYE0|Q4DYE0_TRYCC Uncharacterized protein OS=Trypanosoma cruzi (strain CL Brener) GN=Tc00.1047053506321.280 PE=4 SV=1	1	15	15	15	52	11	13	13	15	11	13	13	15	11	13	13	15	35.1	35.1	35.1	42967	370	370	1	135	0	36.52	By MS/MS	By MS/MS	By MS/MS	By MS/MS	By MS/MS	By MS/MS	27.3	29.5	21.4	21.1	30	35.1	9603900000	1210000000	2017200000	1812600000	2762000000
tr|Q4CS87|Q4CS87_TRYCC	tr|Q4CS87|Q4CS87_TRYCC	17	10	10	>tr|Q4CS87|Q4CS87_TRYCC Calpain cysteine peptidase, putative (Fragment) OS=Trypanosoma cruzi (strain CL Brener) GN=Tc00.1047053511441.10 PE=3 SV=1	1	17	10	10	52	13	14	12	13	7	8	6	7	7	8	6	7	32.1	18.2	18.2	145.23	1275	1275	1	97	0	31186	By MS/MS	By MS/MS	By MS/MS	By MS/MS	By MS/MS	By MS/MS	25.1	27.2	22.6	25.7	25.2	24.9	5866100000	1023300000	1540500000	898270000	1426600000
tr|Q4DE42|Q4DE42_TRYCC;tr|Q4DBP7|Q4DBP7_TRYCC	tr|Q4DE42|Q4DE42_TRYCC;tr|Q4DBP7|Q4DBP7_TRYCC	16;15	7;6	6;6	>tr|Q4DE42|Q4DE42_TRYCC Dipeptidyl-peptidase, putative OS=Trypanosoma cruzi (strain CL Brener) GN=Tc00.1047053508699.120 PE=4 SV=1;>tr|Q4DBP7|Q4DBP7_TRYCC Dipeptidyl-peptidase, putative (Fragment) OS=Trypanosoma cruzi (strain CL Brener) GN=Tc00.10470535086	2	16	7	6	52	10	12	15	15	4	7	6	6	4	6	5	5	33.8	15.1	13.7	76892	677	677;658	1	63	0	40568	By MS/MS	By MS/MS	By MS/MS	By MS/MS	By MS/MS	By MS/MS	25.1	26.7	26.6	25.3	32.3	32.3	2971000000	265260000	642420000	827370000	898290000
tr|Q4CZY9|Q4CZY9_TRYCC	tr|Q4CZY9|Q4CZY9_TRYCC	17	17	5	>tr|Q4CZY9|Q4CZY9_TRYCC Uncharacterized protein OS=Trypanosoma cruzi (strain CL Brener) GN=Tc00.1047053506481.20 PE=4 SV=1	1	17	17	5	52	10	10	16	16	10	10	16	16	2	2	4	4	28.1	28.1	10.6	86243	783	783	1	139	0	88709	By MS/MS	By MS/MS	By MS/MS	By MS/MS	By MS/MS	By MS/MS	17	15.5	13.3	19.7	25.9	25.8	3954500000	479390000	711410000	831130000	1180800000
tr|Q4E5N1|Q4E5N1_TRYCC	tr|Q4E5N1|Q4E5N1_TRYCC	16	4	4	>tr|Q4E5N1|Q4E5N1_TRYCC Glucose-6-phosphate isomerase OS=Trypanosoma cruzi (strain CL Brener) GN=Tc00.1047053506529.508 PE=1 SV=1	1	16	4	4	52	9	14	14	15	1	3	3	4	1	3	3	4	36.3	13	13	68365	608	608	1	55	0	28641	By MS/MS	By MS/MS	By MS/MS	By matching	By MS/MS	By MS/MS	18.9	26.8	18.1	25.8	30.6	31.2	1901400000	264710000	188050000	480160000	717870000
tr|Q4DQ44|Q4DQ44_TRYCC	tr|Q4DQ44|Q4DQ44_TRYCC	13	13	3	>tr|Q4DQ44|Q4DQ44_TRYCC I/6 autoantigen, putative OS=Trypanosoma cruzi (strain CL Brener) GN=Tc00.1047053511825.80 PE=4 SV=1	1	13	13	3	51	12	13	13	13	12	13	13	13	2	3	3	3	64.2	64.2	16.3	23119	215	215	1	250	0	319.78	By MS/MS	By MS/MS	By MS/MS	By MS/MS	By MS/MS	By MS/MS	60.9	64.2	60.9	60.9	64.2	64.2	62732000000	10637000000	13594000000	8393000000	13297000000
tr|Q4D5P4|Q4D5P4_TRYCC	tr|Q4D5P4|Q4D5P4_TRYCC	14	14	14	>tr|Q4D5P4|Q4D5P4_TRYCC 40S ribosomal protein S4 OS=Trypanosoma cruzi (strain CL Brener) GN=Tc00.1047053509683.117 PE=3 SV=1	1	14	14	14	51	12	12	14	13	12	12	14	13	12	12	14	13	47.3	47.3	47.3	30875	273	273	1	156	0	38215	By MS/MS	By MS/MS	By MS/MS	By MS/MS	By MS/MS	By MS/MS	41.8	39.9	33	27.8	47.3	44	28792000000	3898000000	4614000000	6268100000	11102000000
tr|Q4DWL8|Q4DWL8_TRYCC	tr|Q4DWL8|Q4DWL8_TRYCC	14	14	2	>tr|Q4DWL8|Q4DWL8_TRYCC Dihydrolipoyl dehydrogenase OS=Trypanosoma cruzi (strain CL Brener) GN=Tc00.1047053507089.270 PE=3 SV=1	1	14	14	2	51	12	14	12	13	12	14	12	13	1	2	0	2	33.8	33.8	2.9	50512	477	477	1	226	0	214.14	By MS/MS	By MS/MS	By MS/MS	By MS/MS	By MS/MS	By MS/MS	30	33.8	24.5	21.8	30.8	31.4	23602000000	3747500000	5455600000	3784300000	6882400000
tr|Q4CPG3|Q4CPG3_TRYCC	tr|Q4CPG3|Q4CPG3_TRYCC	14	14	14	>tr|Q4CPG3|Q4CPG3_TRYCC Chaperonin TCP20, putative OS=Trypanosoma cruzi (strain CL Brener) GN=Tc00.1047053509583.10 PE=3 SV=1	1	14	14	14	51	13	12	14	12	13	12	14	12	13	12	14	12	33.7	33.7	33.7	58998	543	543	1	196	0	292.64	By MS/MS	By MS/MS	By MS/MS	By MS/MS	By MS/MS	By MS/MS	32.4	27.8	26.5	19.9	33.7	32.4	14993000000	2316100000	2946700000	2839000000	4682100000
tr|Q4DQN5|Q4DQN5_TRYCC	tr|Q4DQN5|Q4DQN5_TRYCC	16	16	3	>tr|Q4DQN5|Q4DQN5_TRYCC Calpain-like cysteine peptidase, putative OS=Trypanosoma cruzi (strain CL Brener) GN=Tc00.1047053506563.210 PE=3 SV=1	1	16	16	3	51	10	11	15	15	10	11	15	15	2	2	3	3	37.7	37.7	7.9	78284	692	692	1	139	0	162.36	By MS/MS	By MS/MS	By MS/MS	By MS/MS	By MS/MS	By MS/MS	19.1	21.5	21.5	19.1	34	33.2	9798300000	1385500000	2164900000	1448700000	2806700000
tr|Q4DRF1|Q4DRF1_TRYCC	tr|Q4DRF1|Q4DRF1_TRYCC	15	15	15	>tr|Q4DRF1|Q4DRF1_TRYCC Uncharacterized protein OS=Trypanosoma cruzi (strain CL Brener) GN=Tc00.1047053508547.160 PE=4 SV=1	1	15	15	15	51	11	12	15	13	11	12	15	13	11	12	15	13	23.5	23.5	23.5	90558	792	792	1	157	0	121.11	By MS/MS	By MS/MS	By MS/MS	By MS/MS	By MS/MS	By MS/MS	17.4	17.3	15.2	16.5	23.5	18.9	5297500000	866070000	1322500000	753770000	1210800000
tr|Q4E0I0|Q4E0I0_TRYCC	tr|Q4E0I0|Q4E0I0_TRYCC	15	9	1	>tr|Q4E0I0|Q4E0I0_TRYCC Retrotransposon hot spot (RHS) protein, putative OS=Trypanosoma cruzi (strain CL Brener) GN=Tc00.1047053508325.160 PE=4 SV=1	1	15	9	1	51	11	12	13	15	5	6	8	9	0	0	1	1	20.7	14	2.4	112	980	980	1	91	0	59444	By MS/MS	By MS/MS	By MS/MS	By MS/MS	By MS/MS	By MS/MS	12.9	14.7	15.3	11.8	17.7	20.7	5970800000	1193500000	1008000000	1033100000	1098800000
tr|Q4DMN4|Q4DMN4_TRYCC	tr|Q4DMN4|Q4DMN4_TRYCC	17	17	8	>tr|Q4DMN4|Q4DMN4_TRYCC Uncharacterized protein OS=Trypanosoma cruzi (strain CL Brener) GN=Tc00.1047053510055.50 PE=4 SV=1	1	17	17	8	51	10	9	16	16	10	9	16	16	5	5	8	7	25.3	25.3	11.4	108.37	975	975	1	145	0	96379	By MS/MS	By MS/MS	By MS/MS	By MS/MS	By MS/MS	By MS/MS	16.6	13.2	13.6	12.9	23.5	24.3	5697700000	966730000	925320000	1098600000	1627900000
tr|Q4DGG7|Q4DGG7_TRYCC;tr|Q4E0N0|Q4E0N0_TRYCC	tr|Q4DGG7|Q4DGG7_TRYCC	17;1	15;1	4;0	>tr|Q4DGG7|Q4DGG7_TRYCC Retrotransposon hot spot (RHS) protein, putative OS=Trypanosoma cruzi (strain CL Brener) GN=Tc00.1047053508001.70 PE=4 SV=1	2	17	15	4	51	11	12	14	14	10	11	12	13	1	1	3	4	36.8	34.5	13.2	66699	589	589;778	1	119	0	149.31	By MS/MS	By MS/MS	By MS/MS	By MS/MS	By MS/MS	By MS/MS	18.7	24.8	23.4	19	31.4	34.1	3129500000	394400000	535360000	719590000	1097500000
tr|Q4D7R8|Q4D7R8_TRYCC	tr|Q4D7R8|Q4D7R8_TRYCC	15	3	3	>tr|Q4D7R8|Q4D7R8_TRYCC Uncharacterized protein OS=Trypanosoma cruzi (strain CL Brener) GN=Tc00.1047053511295.50 PE=4 SV=1	1	15	3	3	51	11	10	15	15	3	2	3	3	3	2	3	3	24.9	7.4	7.4	86312	783	783	1	26	0	64816	By MS/MS	By MS/MS	By MS/MS	By MS/MS	By MS/MS	By MS/MS	19.3	16.7	15.2	17.1	24.9	24.9	707170000	196860000	50490000	88717000	272540000
tr|Q4DTV8|Q4DTV8_TRYCC;tr|Q4D5L9|Q4D5L9_TRYCC	tr|Q4DTV8|Q4DTV8_TRYCC;tr|Q4D5L9|Q4D5L9_TRYCC	14;12	14;12	14;12	>tr|Q4DTV8|Q4DTV8_TRYCC Uncharacterized protein OS=Trypanosoma cruzi (strain CL Brener) GN=Tc00.1047053508693.50 PE=4 SV=1;>tr|Q4D5L9|Q4D5L9_TRYCC Uncharacterized protein (Fragment) OS=Trypanosoma cruzi (strain CL Brener) GN=Tc00.1047053505989.110 PE=4 SV=	2	14	14	14	50	10	12	14	14	10	12	14	14	10	12	14	14	49.3	49.3	49.3	43079	377	377;254	1	240	0	193.91	By MS/MS	By MS/MS	By MS/MS	By MS/MS	By MS/MS	By MS/MS	37.7	44	37.7	37.7	49.3	49.3	53554000000	8941600000	12365000000	8742400000	13444000000
tr|Q4DAI2|Q4DAI2_TRYCC;tr|Q4DGW7|Q4DGW7_TRYCC;tr|Q4DAI1|Q4DAI1_TRYCC	tr|Q4DAI2|Q4DAI2_TRYCC	15;3;3	15;3;3	3;0;0	>tr|Q4DAI2|Q4DAI2_TRYCC Aminoacylase, putative OS=Trypanosoma cruzi (strain CL Brener) GN=Tc00.1047053506363.70 PE=4 SV=1	3	15	15	3	50	11	12	15	12	11	12	15	12	2	2	3	2	65.2	65.2	14.6	42794	396	396;106;189	1	175	0	181.7	By MS/MS	By MS/MS	By MS/MS	By MS/MS	By MS/MS	By MS/MS	42.7	42.2	40.9	36.4	65.2	45.5	16831000000	2582300000	3199500000	3349600000	5528100000
tr|Q4D7E5|Q4D7E5_TRYCC	tr|Q4D7E5|Q4D7E5_TRYCC	16	16	5	>tr|Q4D7E5|Q4D7E5_TRYCC Uncharacterized protein OS=Trypanosoma cruzi (strain CL Brener) GN=Tc00.1047053509205.120 PE=4 SV=1	1	16	16	5	50	11	10	15	14	11	10	15	14	4	4	5	3	37.3	37.3	13.2	72862	643	643	1	166	0	204.08	By MS/MS	By MS/MS	By MS/MS	By MS/MS	By MS/MS	By MS/MS	28	26.7	28	25.3	37.3	31.3	15507000000	2369100000	3407800000	2902000000	4199100000
tr|Q4DFX9|Q4DFX9_TRYCC	tr|Q4DFX9|Q4DFX9_TRYCC	14	14	5	>tr|Q4DFX9|Q4DFX9_TRYCC Aminopeptidase P, putative OS=Trypanosoma cruzi (strain CL Brener) GN=Tc00.1047053510655.120 PE=3 SV=1	1	14	14	5	50	13	12	12	13	13	12	12	13	5	3	5	4	37.1	37.1	15.3	56804	509	509	1	164	0	305.65	By MS/MS	By MS/MS	By MS/MS	By MS/MS	By MS/MS	By MS/MS	35.4	31	17.1	33.2	33.8	33	10108000000	1735100000	2462300000	1683300000	2624200000
tr|Q4DK44|Q4DK44_TRYCC	tr|Q4DK44|Q4DK44_TRYCC	15	15	15	>tr|Q4DK44|Q4DK44_TRYCC Acyl-CoA dehydrogenase, putative OS=Trypanosoma cruzi (strain CL Brener) GN=Tc00.1047053508827.40 PE=3 SV=1	1	15	15	15	50	10	11	15	14	10	11	15	14	10	11	15	14	31.1	31.1	31.1	68669	624	624	1	181	0	130.64	By MS/MS	By MS/MS	By MS/MS	By MS/MS	By MS/MS	By MS/MS	17.9	20.5	17.9	17.9	31.1	29.6	10710000000	1593800000	2051500000	2101200000	2944600000
tr|Q4DJX8|Q4DJX8_TRYCC	tr|Q4DJX8|Q4DJX8_TRYCC	17	17	2	>tr|Q4DJX8|Q4DJX8_TRYCC Regulatory subunit of protein kinase a-like protein, putative OS=Trypanosoma cruzi (strain CL Brener) GN=Tc00.1047053510879.50 PE=4 SV=1	1	17	17	2	50	11	10	14	15	11	10	14	15	1	1	2	1	37.1	37.1	8.1	62.8	558	558	1	150	0	150.42	By MS/MS	By MS/MS	By MS/MS	By MS/MS	By MS/MS	By MS/MS	22.8	21.5	16.1	15.6	31.2	28.9	9846100000	1161900000	1655100000	1935500000	3489100000
tr|Q4DTH5|Q4DTH5_TRYCC;tr|Q4CRW0|Q4CRW0_TRYCC	tr|Q4DTH5|Q4DTH5_TRYCC	15;4	15;4	14;4	>tr|Q4DTH5|Q4DTH5_TRYCC ATP-dependent Clp protease subunit, heat shock protein 78, putative OS=Trypanosoma cruzi (strain CL Brener) GN=Tc00.1047053508737.100 PE=4 SV=1	2	15	15	14	50	12	12	13	13	12	12	13	13	11	11	12	12	24.2	24.2	22.6	90059	802	802;368	1	156	0	61077	By MS/MS	By MS/MS	By MS/MS	By MS/MS	By MS/MS	By MS/MS	19.8	19.8	12.5	15.8	19.8	22.1	9002000000	1529400000	2035200000	1420900000	2336200000
tr|Q4DXC0|Q4DXC0_TRYCC	tr|Q4DXC0|Q4DXC0_TRYCC	16	16	16	>tr|Q4DXC0|Q4DXC0_TRYCC Proteasome regulatory non-ATPase subunit 2, putative OS=Trypanosoma cruzi (strain CL Brener) GN=Tc00.1047053510901.150 PE=4 SV=1	1	16	16	16	50	11	11	16	12	11	11	16	12	11	11	16	12	25.4	25.4	25.4	105.69	961	961	1	181	0	183.85	By MS/MS	By MS/MS	By MS/MS	By MS/MS	By MS/MS	By MS/MS	15.4	16.3	18.8	15.4	25.4	15.4	7172300000	1156500000	1613000000	948710000	1609200000
tr|Q4DUI3|Q4DUI3_TRYCC;tr|Q4CL56|Q4CL56_TRYCC;tr|Q4CT42|Q4CT42_TRYCC;tr|Q4DDJ6|Q4DDJ6_TRYCC;tr|Q4D0E2|Q4D0E2_TRYCC	tr|Q4DUI3|Q4DUI3_TRYCC	15;1;1;1;1	15;1;1;1;1	3;0;0;0;0	>tr|Q4DUI3|Q4DUI3_TRYCC ATP-dependent RNA helicase, putative OS=Trypanosoma cruzi (strain CL Brener) GN=Tc00.1047053510661.90 PE=3 SV=1	5	15	15	3	50	11	10	15	14	11	10	15	14	3	2	3	3	27.4	27.4	5.1	89552	792	792;172;507;718;718	1	151	0	199.62	By MS/MS	By MS/MS	By MS/MS	By MS/MS	By MS/MS	By MS/MS	18.3	16.9	16	15.2	27.4	27	6777000000	981760000	1224600000	1420200000	2296800000
tr|Q4D1L5|Q4D1L5_TRYCC;tr|Q4DEW6|Q4DEW6_TRYCC	tr|Q4D1L5|Q4D1L5_TRYCC	17;4	17;4	10;4	>tr|Q4D1L5|Q4D1L5_TRYCC T-complex protein 1 subunit gamma OS=Trypanosoma cruzi (strain CL Brener) GN=Tc00.1047053504003.60 PE=3 SV=1	2	17	17	10	50	10	8	16	16	10	8	16	16	6	4	10	9	38.9	38.9	24.3	60668	555	555;247	1	155	0	81404	By MS/MS	By MS/MS	By MS/MS	By MS/MS	By MS/MS	By MS/MS	24.7	17.5	15.5	17.1	38.7	35.5	6361600000	645220000	989550000	1547200000	2100600000
tr|Q4DD33|Q4DD33_TRYCC	tr|Q4DD33|Q4DD33_TRYCC	13	1	1	>tr|Q4DD33|Q4DD33_TRYCC Dihydrolipoyl dehydrogenase OS=Trypanosoma cruzi (strain CL Brener) GN=Tc00.1047053511025.110 PE=3 SV=1	1	13	1	1	50	12	13	13	12	1	1	1	1	1	1	1	1	34.6	3.8	3.8	50588	477	477	1	14	0	96444	By MS/MS	By matching	By matching	By matching	By MS/MS	By MS/MS	32.3	34.6	24.5	21.8	34.6	32.3	162940000	16375000	22646000	69218000	54701000
tr|Q4D1D3|Q4D1D3_TRYCC;tr|Q4CKU2|Q4CKU2_TRYCC	tr|Q4D1D3|Q4D1D3_TRYCC;tr|Q4CKU2|Q4CKU2_TRYCC	15;9	3;2	3;2	>tr|Q4D1D3|Q4D1D3_TRYCC Myosin heavy chain, putative (Fragment) OS=Trypanosoma cruzi (strain CL Brener) GN=Tc00.1047053506491.20 PE=4 SV=1;>tr|Q4CKU2|Q4CKU2_TRYCC Uncharacterized protein (Fragment) OS=Trypanosoma cruzi (strain CL Brener) GN=Tc00.1047053443	2	15	3	3	50	12	11	13	14	2	2	3	2	2	2	3	2	23.3	6.2	6.2	398.91	3543	3543;500	1	25	0	63002	By MS/MS	By MS/MS	By MS/MS	By MS/MS	By MS/MS	By MS/MS	16.1	15.2	14.6	19.3	21.6	22.7	405680000	97184000	75206000	75392000	67722000
tr|Q4D301|Q4D301_TRYCC;tr|Q4D2Z9|Q4D2Z9_TRYCC	tr|Q4D301|Q4D301_TRYCC;tr|Q4D2Z9|Q4D2Z9_TRYCC	14;14	2;2	2;2	>tr|Q4D301|Q4D301_TRYCC Tryparedoxin peroxidase, putative OS=Trypanosoma cruzi (strain CL Brener) GN=Tc00.1047053504839.28 PE=4 SV=1;>tr|Q4D2Z9|Q4D2Z9_TRYCC Tryparedoxin peroxidase OS=Trypanosoma cruzi (strain CL Brener) GN=Tc00.1047053504839.44 PE=4 SV=1	2	14	2	2	49	11	12	14	12	2	2	2	2	2	2	2	2	80.9	10.6	10.6	22375	199	199;199	1	94	0	30922	By MS/MS	By MS/MS	By MS/MS	By MS/MS	By MS/MS	By MS/MS	52.3	65.8	41.7	38.7	80.9	66.3	42111000000	7612300000	9204300000	5205900000	10783000000
tr|Q4E2Q5|Q4E2Q5_TRYCC	tr|Q4E2Q5|Q4E2Q5_TRYCC	15	15	15	>tr|Q4E2Q5|Q4E2Q5_TRYCC Uncharacterized protein OS=Trypanosoma cruzi (strain CL Brener) GN=Tc00.1047053504153.280 PE=4 SV=1	1	15	15	15	49	12	9	13	15	12	9	13	15	12	9	13	15	36.1	36.1	36.1	45896	410	410	1	220	0	203.99	By MS/MS	By MS/MS	By MS/MS	By MS/MS	By MS/MS	By MS/MS	32.7	25.1	24.9	25.1	32.7	36.1	35757000000	6143200000	7114500000	5267700000	7946500000
tr|Q4DKS7|Q4DKS7_TRYCC	tr|Q4DKS7|Q4DKS7_TRYCC	17	17	6	>tr|Q4DKS7|Q4DKS7_TRYCC Nucleoside phosphorylase, putative OS=Trypanosoma cruzi (strain CL Brener) GN=Tc00.1047053509569.100 PE=4 SV=1	1	17	17	6	49	8	10	14	17	8	10	14	17	4	4	4	6	51.2	51.2	19.8	37066	344	344	1	140	0	117.41	By MS/MS	By MS/MS	By MS/MS	By MS/MS	By MS/MS	By MS/MS	23.3	29.4	17.2	14.5	48	51.2	15687000000	2340800000	2886200000	2147900000	4463300000
tr|Q4CUW8|Q4CUW8_TRYCC	tr|Q4CUW8|Q4CUW8_TRYCC	14	11	9	>tr|Q4CUW8|Q4CUW8_TRYCC Retrotransposon hot spot (RHS) protein, putative OS=Trypanosoma cruzi (strain CL Brener) GN=Tc00.1047053509787.10 PE=4 SV=1	1	14	11	9	49	12	12	13	12	10	10	10	11	8	8	8	9	28.1	25.4	22.3	67727	587	587	1	130	0	108.97	By MS/MS	By MS/MS	By MS/MS	By MS/MS	By MS/MS	By MS/MS	23.5	23.5	22.8	19.4	24.5	25.4	7544800000	1138300000	1682800000	1220100000	2258000000
tr|Q4CNA4|Q4CNA4_TRYCC	tr|Q4CNA4|Q4CNA4_TRYCC	13	4	4	>tr|Q4CNA4|Q4CNA4_TRYCC Mitochondrial processing peptidase, beta subunit, putative (Fragment) OS=Trypanosoma cruzi (strain CL Brener) GN=Tc00.1047053508301.20 PE=4 SV=1	1	13	4	4	49	12	12	13	12	3	3	4	3	3	3	4	3	65.8	18.4	18.4	30792	272	272	1	37	0	41495	By MS/MS	By MS/MS	By MS/MS	By MS/MS	By MS/MS	By MS/MS	56.6	56.6	56.6	56.6	65.8	56.6	3356600000	492360000	674240000	431610000	952600000
tr|Q4DGW6|Q4DGW6_TRYCC	tr|Q4DGW6|Q4DGW6_TRYCC	14	2	2	>tr|Q4DGW6|Q4DGW6_TRYCC Aminoacylase, putative OS=Trypanosoma cruzi (strain CL Brener) GN=Tc00.1047053506975.40 PE=4 SV=1	1	14	2	2	49	11	12	14	12	2	2	2	2	2	2	2	2	58.1	7.6	7.6	42787	396	396	1	31	0	56632	By MS/MS	By MS/MS	By MS/MS	By MS/MS	By MS/MS	By MS/MS	42.7	42.2	44.4	36.4	58.1	45.5	1843200000	330520000	409130000	340980000	477290000
tr|Q4DQQ7|Q4DQQ7_TRYCC;tr|Q4CPJ9|Q4CPJ9_TRYCC	tr|Q4DQQ7|Q4DQQ7_TRYCC;tr|Q4CPJ9|Q4CPJ9_TRYCC	16;8	16;8	12;8	>tr|Q4DQQ7|Q4DQQ7_TRYCC Valyl-tRNA synthetase, putative OS=Trypanosoma cruzi (strain CL Brener) GN=Tc00.1047053509167.100 PE=3 SV=1;>tr|Q4CPJ9|Q4CPJ9_TRYCC Valyl-tRNA synthetase, putative (Fragment) OS=Trypanosoma cruzi (strain CL Brener) GN=Tc00.104705351	2	16	16	12	49	9	10	15	15	9	10	15	15	7	8	12	11	22.8	22.8	18.3	111.13	975	975;413	1	151	0	150.35	By MS/MS	By MS/MS	By MS/MS	By MS/MS	By MS/MS	By MS/MS	11	15.7	10.2	8.6	21.6	21.4	6460900000	827610000	1658100000	975870000	1787400000
tr|Q4CR45|Q4CR45_TRYCC	tr|Q4CR45|Q4CR45_TRYCC	13	2	2	>tr|Q4CR45|Q4CR45_TRYCC Gim5A protein, putative (Fragment) OS=Trypanosoma cruzi (strain CL Brener) GN=Tc00.1047053510669.49 PE=4 SV=1	1	13	2	2	49	13	12	12	12	2	2	1	1	2	2	1	1	68.9	11.2	11.2	17631	161	161	1	15	0	25801	By MS/MS	By matching	By MS/MS	By MS/MS	By MS/MS	By matching	68.9	68.9	63.4	68.9	63.4	63.4	558330000	155050000	196050000	20369000	38725000
tr|Q4CX87|Q4CX87_TRYCC	tr|Q4CX87|Q4CX87_TRYCC	13	13	11	>tr|Q4CX87|Q4CX87_TRYCC Tryparedoxin peroxidase, putative OS=Trypanosoma cruzi (strain CL Brener) GN=Tc00.1047053509499.14 PE=4 SV=1	1	13	13	11	48	11	11	13	13	11	11	13	13	9	9	11	11	59.7	59.7	51.3	25506	226	226	1	234	0	65319	By MS/MS	By MS/MS	By MS/MS	By MS/MS	By MS/MS	By MS/MS	44.7	44.7	44.7	44.7	59.7	59.7	33501000000	5499700000	7361000000	4772100000	8319200000
tr|Q4DU62|Q4DU62_TRYCC	tr|Q4DU62|Q4DU62_TRYCC	14	12	12	>tr|Q4DU62|Q4DU62_TRYCC Glutamamyl carboxypeptidase, putative OS=Trypanosoma cruzi (strain CL Brener) GN=Tc00.1047053511391.120 PE=4 SV=1	1	14	12	12	48	10	11	14	13	8	9	12	11	8	9	12	11	30.5	25.4	25.4	43706	394	394	1	140	0	54362	By MS/MS	By MS/MS	By MS/MS	By MS/MS	By MS/MS	By MS/MS	25.4	25.6	25.4	25.4	30.5	28.9	31141000000	5730200000	8180300000	2990300000	8679800000
tr|Q4D3F7|Q4D3F7_TRYCC	tr|Q4D3F7|Q4D3F7_TRYCC	14	14	8	>tr|Q4D3F7|Q4D3F7_TRYCC Uncharacterized protein OS=Trypanosoma cruzi (strain CL Brener) GN=Tc00.1047053508719.70 PE=4 SV=1	1	14	14	8	48	11	9	14	14	11	9	14	14	6	5	8	8	40.2	40.2	25.9	44106	405	405	1	190	0	176.86	By MS/MS	By MS/MS	By MS/MS	By MS/MS	By MS/MS	By MS/MS	31.9	27.4	31.9	31.9	40.2	40.2	48098000000	7487200000	5966900000	8241900000	13459000000
tr|Q4DMG9|Q4DMG9_TRYCC	tr|Q4DMG9|Q4DMG9_TRYCC	16	16	6	>tr|Q4DMG9|Q4DMG9_TRYCC Acetyltransferase component of pyruvate dehydrogenase complex OS=Trypanosoma cruzi (strain CL Brener) GN=Tc00.1047053509717.20 PE=3 SV=1	1	16	16	6	48	10	11	14	13	10	11	14	13	3	4	4	6	43.5	43.5	22.1	49659	471	471	1	156	0	159.27	By MS/MS	By MS/MS	By MS/MS	By MS/MS	By MS/MS	By MS/MS	23.4	27.2	22.7	22.3	36.5	34.2	13987000000	2441200000	2498300000	2332800000	3689000000
tr|Q4E4Q4|Q4E4Q4_TRYCC	tr|Q4E4Q4|Q4E4Q4_TRYCC	13	13	13	>tr|Q4E4Q4|Q4E4Q4_TRYCC Uncharacterized protein OS=Trypanosoma cruzi (strain CL Brener) GN=Tc00.1047053508461.550 PE=4 SV=1	1	13	13	13	48	10	12	13	13	10	12	13	13	10	12	13	13	43.8	43.8	43.8	50615	434	434	1	169	0	289.53	By MS/MS	By MS/MS	By MS/MS	By MS/MS	By MS/MS	By MS/MS	33.9	40.3	37.3	33.6	43.8	43.8	13653000000	2127600000	2805300000	2247200000	3419700000
tr|Q4E5I8|Q4E5I8_TRYCC;tr|Q4DY24|Q4DY24_TRYCC	tr|Q4E5I8|Q4E5I8_TRYCC;tr|Q4DY24|Q4DY24_TRYCC	13;13	13;13	13;13	>tr|Q4E5I8|Q4E5I8_TRYCC Elongation factor TU, putative OS=Trypanosoma cruzi (strain CL Brener) GN=Tc00.1047053511277.70 PE=4 SV=1;>tr|Q4DY24|Q4DY24_TRYCC Elongation factor TU, putative OS=Trypanosoma cruzi (strain CL Brener) GN=Tc00.1047053506357.40 PE=4 S	2	13	13	13	48	10	12	13	13	10	12	13	13	10	12	13	13	27.9	27.9	27.9	51784	469	469;469	1	151	0	52022	By MS/MS	By MS/MS	By MS/MS	By MS/MS	By MS/MS	By MS/MS	21.7	24.7	19	20	27.9	27.9	9624200000	1419400000	2247900000	1526900000	2935600000
tr|Q4E4G9|Q4E4G9_TRYCC;tr|Q4DWX7|Q4DWX7_TRYCC	tr|Q4E4G9|Q4E4G9_TRYCC;tr|Q4DWX7|Q4DWX7_TRYCC	14;14	14;14	14;14	>tr|Q4E4G9|Q4E4G9_TRYCC Uncharacterized protein OS=Trypanosoma cruzi (strain CL Brener) GN=Tc00.1047053506885.340 PE=4 SV=1;>tr|Q4DWX7|Q4DWX7_TRYCC Uncharacterized protein OS=Trypanosoma cruzi (strain CL Brener) GN=Tc00.1047053510729.80 PE=4 SV=1	2	14	14	14	48	11	12	12	13	11	12	12	13	11	12	12	13	38	38	38	38502	350	350;350	1	126	0	87605	By MS/MS	By MS/MS	By MS/MS	By MS/MS	By MS/MS	By MS/MS	32.6	32.9	32.9	28.3	33.1	37.7	4272200000	766110000	1172900000	497460000	934890000
tr|Q4CU92|Q4CU92_TRYCC;tr|Q4CMT5|Q4CMT5_TRYCC	tr|Q4CU92|Q4CU92_TRYCC;tr|Q4CMT5|Q4CMT5_TRYCC	13;11	13;11	13;11	>tr|Q4CU92|Q4CU92_TRYCC Uncharacterized protein OS=Trypanosoma cruzi (strain CL Brener) GN=Tc00.1047053510947.30 PE=4 SV=1;>tr|Q4CMT5|Q4CMT5_TRYCC Uncharacterized protein OS=Trypanosoma cruzi (strain CL Brener) GN=Tc00.1047053509497.20 PE=4 SV=1	2	13	13	13	48	12	11	12	13	12	11	12	13	12	11	12	13	30.3	30.3	30.3	48795	423	423;423	1	126	0	157.26	By MS/MS	By MS/MS	By MS/MS	By MS/MS	By MS/MS	By MS/MS	30	30	27.9	22.9	30	30.3	7525700000	1189000000	1473800000	1317500000	2105900000
tr|Q4DFL2|Q4DFL2_TRYCC	tr|Q4DFL2|Q4DFL2_TRYCC	12	2	2	>tr|Q4DFL2|Q4DFL2_TRYCC I/6 autoantigen, putative OS=Trypanosoma cruzi (strain CL Brener) GN=Tc00.1047053508323.100 PE=4 SV=1	1	12	2	2	48	12	12	12	12	2	2	2	2	2	2	2	2	60.9	13	13	23225	215	215	1	41	0	37079	By MS/MS	By MS/MS	By MS/MS	By MS/MS	By MS/MS	By MS/MS	60.9	60.9	60.9	60.9	60.9	60.9	3215100000	563680000	264920000	464310000	810560000
tr|Q4D4Q2|Q4D4Q2_TRYCC	tr|Q4D4Q2|Q4D4Q2_TRYCC	16	16	6	>tr|Q4D4Q2|Q4D4Q2_TRYCC Uncharacterized protein OS=Trypanosoma cruzi (strain CL Brener) GN=Tc00.1047053506229.30 PE=4 SV=1	1	16	16	6	48	10	9	15	14	10	9	15	14	4	4	6	5	32.3	32.3	10.9	59744	539	539	1	120	0	119.35	By MS/MS	By MS/MS	By MS/MS	By MS/MS	By MS/MS	By MS/MS	18.7	13.9	6.1	7.8	32.3	26.3	4763100000	580220000	1242400000	920420000	1501900000
tr|Q4DGP9|Q4DGP9_TRYCC;tr|Q4DX97|Q4DX97_TRYCC	tr|Q4DGP9|Q4DGP9_TRYCC	14;3	14;3	7;3	>tr|Q4DGP9|Q4DGP9_TRYCC Calmodulin, putative OS=Trypanosoma cruzi (strain CL Brener) GN=Tc00.1047053506835.60 PE=4 SV=1	2	14	14	7	48	10	10	14	14	10	10	14	14	3	3	7	7	34.9	34.9	18.2	72762	650	650;323	1	132	0	151.73	By MS/MS	By MS/MS	By MS/MS	By MS/MS	By MS/MS	By MS/MS	22.5	22.5	20.9	25.4	34.9	34.9	5795100000	847900000	1339700000	1002300000	1511800000
tr|Q4CQ34|Q4CQ34_TRYCC;tr|Q4CUZ9|Q4CUZ9_TRYCC;tr|Q4DUN6|Q4DUN6_TRYCC;tr|Q4D981|Q4D981_TRYCC	tr|Q4CQ34|Q4CQ34_TRYCC;tr|Q4CUZ9|Q4CUZ9_TRYCC	15;14;3;3	15;14;3;3	15;14;3;3	>tr|Q4CQ34|Q4CQ34_TRYCC Cysteinyl-tRNA synthetase, putative OS=Trypanosoma cruzi (strain CL Brener) GN=Tc00.1047053507297.20 PE=3 SV=1;>tr|Q4CUZ9|Q4CUZ9_TRYCC Cysteinyl-tRNA synthetase, putative OS=Trypanosoma cruzi (strain CL Brener) GN=Tc00.1047053507537	4	15	15	15	48	9	10	15	14	9	10	15	14	9	10	15	14	25.2	25.2	25.2	89244	785	785;785;188;230	1	125	0	90908	By MS/MS	By MS/MS	By MS/MS	By MS/MS	By MS/MS	By MS/MS	14	16.2	14	12	25.2	23.9	3232500000	469050000	744880000	496900000	948110000
tr|Q4DRK9|Q4DRK9_TRYCC	tr|Q4DRK9|Q4DRK9_TRYCC	15	3	3	>tr|Q4DRK9|Q4DRK9_TRYCC ATP-dependent RNA helicase, putative OS=Trypanosoma cruzi (strain CL Brener) GN=Tc00.1047053510741.180 PE=3 SV=1	1	15	3	3	48	10	10	15	13	2	2	3	2	2	2	3	2	27.8	5.6	5.6	90308	798	798	1	19	0	48591	By matching	By MS/MS	By MS/MS	By MS/MS	By MS/MS	By MS/MS	17.4	17.4	13.9	13	27.8	24.4	501040000	88564000	119840000	131150000	76975000
tr|Q4DWA3|Q4DWA3_TRYCC	tr|Q4DWA3|Q4DWA3_TRYCC	16	3	3	>tr|Q4DWA3|Q4DWA3_TRYCC ABC transporter, putative OS=Trypanosoma cruzi (strain CL Brener) GN=Tc00.1047053506989.30 PE=4 SV=1	1	16	3	3	48	14	12	11	11	3	2	2	0	3	2	2	0	12.1	2.2	2.2	206.83	1866	1866	1	20	0	11225	By MS/MS	By MS/MS	By matching	By MS/MS	By MS/MS	By matching	9.9	9.2	8.1	10.2	8.3	7.5	375340000	178620000	99187000	34070000	0
tr|Q4DI33|Q4DI33_TRYCC;tr|Q4DEK7|Q4DEK7_TRYCC	tr|Q4DI33|Q4DI33_TRYCC	15;4	1;0	1;0	>tr|Q4DI33|Q4DI33_TRYCC Retrotransposon hot spot (RHS) protein, putative (Fragment) OS=Trypanosoma cruzi (strain CL Brener) GN=Tc00.1047053511019.13 PE=4 SV=1	2	15	1	1	48	11	12	12	13	1	1	1	1	1	1	1	1	29.8	2.5	2.5	58581	516	516;916	1	14	0	79233	By matching	By matching	By matching	By matching	By MS/MS	By MS/MS	23.4	26	22.5	19.6	26.4	26.7	495710000	20405000	96423000	155490000	177570000
tr|Q4D418|Q4D418_TRYCC	tr|Q4D418|Q4D418_TRYCC	14	14	2	>tr|Q4D418|Q4D418_TRYCC Glycosomal membrane protein, putative OS=Trypanosoma cruzi (strain CL Brener) GN=Tc00.1047053511017.50 PE=4 SV=1	1	14	14	2	47	10	13	14	10	10	13	14	10	0	2	2	0	67.4	67.4	13.3	23939	218	218	1	168	0	152.61	By MS/MS	By MS/MS	By MS/MS	By MS/MS	By MS/MS	By MS/MS	46.8	61	67.4	59.2	67.4	51.4	21717000000	2840700000	7119600000	4110200000	2879300000
sp|Q4DZ41|RS3A2_TRYCC;sp|Q4D2R9|RS3A1_TRYCC;tr|Q4CT90|Q4CT90_TRYCC;REV__tr|Q4E0K9|Q4E0K9_TRYCC;tr|Q4DWS2|Q4DWS2_TRYCC;tr|Q4DAT3|Q4DAT3_TRYCC	sp|Q4DZ41|RS3A2_TRYCC;sp|Q4D2R9|RS3A1_TRYCC;tr|Q4CT90|Q4CT90_TRYCC	15;15;13;1;1;1	15;15;13;1;1;1	15;15;13;1;1;1	>sp|Q4DZ41|RS3A2_TRYCC 40S ribosomal protein S3a-2 OS=Trypanosoma cruzi (strain CL Brener) GN=Tc00.1047053511001.9 PE=3 SV=1;>sp|Q4D2R9|RS3A1_TRYCC 40S ribosomal protein S3a-1 OS=Trypanosoma cruzi (strain CL Brener) GN=Tc00.1047053503635.59 PE=3 SV=1;>tr|Q	6	15	15	15	47	11	11	12	13	11	11	12	13	11	11	12	13	59	59	59	29854	261	261;261;246;396;1313;1313	1	147	0	59998	By MS/MS	By MS/MS	By MS/MS	By MS/MS	By MS/MS	By MS/MS	39.5	38.3	26.1	34.9	47.1	51	18512000000	2145400000	2368000000	3918500000	7432800000
tr|Q4DG65|Q4DG65_TRYCC	tr|Q4DG65|Q4DG65_TRYCC	13	13	12	>tr|Q4DG65|Q4DG65_TRYCC Isocitrate dehydrogenase [NADP] OS=Trypanosoma cruzi (strain CL Brener) GN=Tc00.1047053511575.60 PE=3 SV=1	1	13	13	12	47	12	11	12	12	12	11	12	12	11	10	11	11	36	36	33.7	48745	433	433	1	201	0	175.15	By MS/MS	By MS/MS	By MS/MS	By MS/MS	By MS/MS	By MS/MS	31.2	29.6	31.2	31.2	35.6	35.6	15964000000	2764100000	4024200000	2175400000	3437600000
tr|Q4DAP5|Q4DAP5_TRYCC	tr|Q4DAP5|Q4DAP5_TRYCC	13	13	4	>tr|Q4DAP5|Q4DAP5_TRYCC Uncharacterized protein OS=Trypanosoma cruzi (strain CL Brener) GN=Tc00.1047053511439.40 PE=4 SV=1	1	13	13	4	47	12	11	12	12	12	11	12	12	3	2	3	3	36.7	36.7	15.2	52084	455	455	1	155	0	128.74	By MS/MS	By MS/MS	By MS/MS	By MS/MS	By MS/MS	By MS/MS	33	28.1	30.1	22.4	31.9	31.9	16662000000	2679800000	3836800000	2455400000	4301000000
tr|Q4CVX7|Q4CVX7_TRYCC;tr|Q4CYX2|Q4CYX2_TRYCC	tr|Q4CVX7|Q4CVX7_TRYCC;tr|Q4CYX2|Q4CYX2_TRYCC	14;9	14;9	14;9	>tr|Q4CVX7|Q4CVX7_TRYCC Uncharacterized protein OS=Trypanosoma cruzi (strain CL Brener) GN=Tc00.1047053511729.60 PE=4 SV=1;>tr|Q4CYX2|Q4CYX2_TRYCC Uncharacterized protein (Fragment) OS=Trypanosoma cruzi (strain CL Brener) GN=Tc00.1047053506833.79 PE=4 SV=1	2	14	14	14	47	12	10	13	12	12	10	13	12	12	10	13	12	47.8	47.8	47.8	40.86	358	358;201	1	155	0	108.19	By MS/MS	By MS/MS	By MS/MS	By MS/MS	By MS/MS	By MS/MS	39.7	33.2	30.4	33.2	43	39.9	8347300000	1225900000	2084200000	1340500000	1745100000
tr|Q4DWG6|Q4DWG6_TRYCC	tr|Q4DWG6|Q4DWG6_TRYCC	14	14	14	>tr|Q4DWG6|Q4DWG6_TRYCC Chaperonin containing T-complex protein, putative OS=Trypanosoma cruzi (strain CL Brener) GN=Tc00.1047053511725.250 PE=3 SV=1	1	14	14	14	47	9	10	14	14	9	10	14	14	9	10	14	14	32.3	32.3	32.3	59185	538	538	1	122	0	118.7	By MS/MS	By MS/MS	By MS/MS	By MS/MS	By MS/MS	By MS/MS	17.3	19.3	13.2	14.5	32.3	32.3	12111000000	1778800000	2231400000	2453100000	3942100000
tr|Q4DTP9|Q4DTP9_TRYCC;tr|Q4CRI3|Q4CRI3_TRYCC	tr|Q4DTP9|Q4DTP9_TRYCC	14;5	14;5	14;5	>tr|Q4DTP9|Q4DTP9_TRYCC T-complex protein 1 subunit delta OS=Trypanosoma cruzi (strain CL Brener) GN=Tc00.1047053509695.200 PE=3 SV=1	2	14	14	14	47	9	12	13	13	9	12	13	13	9	12	13	13	33.5	33.5	33.5	58739	537	537;204	1	148	0	82425	By MS/MS	By MS/MS	By MS/MS	By MS/MS	By MS/MS	By MS/MS	22	28.7	19.9	18.1	31.5	31.5	10595000000	1616400000	1986000000	2019800000	3095900000
tr|Q4DJ45|Q4DJ45_TRYCC	tr|Q4DJ45|Q4DJ45_TRYCC	13	13	3	>tr|Q4DJ45|Q4DJ45_TRYCC Uncharacterized protein (Fragment) OS=Trypanosoma cruzi (strain CL Brener) GN=Tc00.1047053511755.119 PE=4 SV=1	1	13	13	3	47	11	11	13	12	11	11	13	12	3	3	3	3	35.5	35.5	7	61155	543	543	1	150	0	230.48	By MS/MS	By MS/MS	By MS/MS	By MS/MS	By MS/MS	By MS/MS	30	30	26.5	26.5	35.5	33.9	6379000000	892960000	1196000000	1306700000	2184400000
tr|Q4DYG2|Q4DYG2_TRYCC	tr|Q4DYG2|Q4DYG2_TRYCC	13	13	13	>tr|Q4DYG2|Q4DYG2_TRYCC Mitochondrial processing peptidase alpha subunit, putative OS=Trypanosoma cruzi (strain CL Brener) GN=Tc00.1047053511367.340 PE=4 SV=1	1	13	13	13	47	10	11	13	13	10	11	13	13	10	11	13	13	39	39	39	52957	477	477	1	176	0	119.88	By MS/MS	By MS/MS	By MS/MS	By MS/MS	By MS/MS	By MS/MS	30.2	32.9	37.5	39	39	39	5923300000	714490000	936130000	1052800000	1555300000
tr|Q4DGP4|Q4DGP4_TRYCC	tr|Q4DGP4|Q4DGP4_TRYCC	15	15	15	>tr|Q4DGP4|Q4DGP4_TRYCC Uncharacterized protein OS=Trypanosoma cruzi (strain CL Brener) GN=Tc00.1047053506835.110 PE=4 SV=1	1	15	15	15	47	12	12	11	12	12	12	11	12	12	12	11	12	26	26	26	82906	734	734	1	128	0	87435	By MS/MS	By MS/MS	By MS/MS	By MS/MS	By MS/MS	By MS/MS	17.2	18.4	14.4	16.2	18.3	20.8	6008100000	963890000	1247400000	1326300000	1519100000
tr|Q4CQR0|Q4CQR0_TRYCC;tr|Q4E0Y5|Q4E0Y5_TRYCC;tr|Q4CQR1|Q4CQR1_TRYCC	tr|Q4CQR0|Q4CQR0_TRYCC;tr|Q4E0Y5|Q4E0Y5_TRYCC	16;13;2	16;13;2	5;2;0	>tr|Q4CQR0|Q4CQR0_TRYCC Phosphodiesterase OS=Trypanosoma cruzi (strain CL Brener) GN=Tc00.1047053509943.20 PE=3 SV=1;>tr|Q4E0Y5|Q4E0Y5_TRYCC Phosphodiesterase OS=Trypanosoma cruzi (strain CL Brener) GN=Tc00.1047053508277.110 PE=3 SV=1	3	16	16	5	47	10	10	14	13	10	10	14	13	4	4	4	4	24.3	24.3	8.5	103.64	929	929;929;91	1	122	0	93753	By MS/MS	By MS/MS	By MS/MS	By MS/MS	By MS/MS	By MS/MS	12.7	12.7	11.1	11.7	22.4	16.7	3410300000	537950000	800380000	511770000	960170000
tr|Q4D8L7|Q4D8L7_TRYCC	tr|Q4D8L7|Q4D8L7_TRYCC	13	1	1	>tr|Q4D8L7|Q4D8L7_TRYCC Glycosomal membrane protein, putative OS=Trypanosoma cruzi (strain CL Brener) GN=Tc00.1047053509203.40 PE=4 SV=1	1	13	1	1	47	11	12	13	11	1	1	1	1	1	1	1	1	59.2	5	5	23869	218	218	1	26	0	12052	By MS/MS	By MS/MS	By MS/MS	By MS/MS	By MS/MS	By MS/MS	51.8	52.8	59.2	59.2	59.2	56.4	317330000	45331000	128140000	31254000	0
tr|Q4CX61|Q4CX61_TRYCC;REV__tr|Q4DBQ4|Q4DBQ4_TRYCC;REV__tr|Q4D7I1|Q4D7I1_TRYCC	tr|Q4CX61|Q4CX61_TRYCC	15;1;1	4;1;1	4;1;1	>tr|Q4CX61|Q4CX61_TRYCC Uncharacterized protein (Fragment) OS=Trypanosoma cruzi (strain CL Brener) GN=Tc00.1047053404001.20 PE=4 SV=1	3	15	4	4	47	12	11	13	11	4	3	3	3	4	3	3	3	12.9	3.9	3.9	262.78	2329	2329;574;574	1	39	0	77071	By MS/MS	By MS/MS	By MS/MS	By MS/MS	By MS/MS	By MS/MS	10.3	9.5	8.3	9.2	11.8	11	721340000	166750000	178850000	133650000	135730000
tr|Q4D6P2|Q4D6P2_TRYCC	tr|Q4D6P2|Q4D6P2_TRYCC	16	1	1	>tr|Q4D6P2|Q4D6P2_TRYCC Regulatory subunit of protein kinase a-like protein, putative OS=Trypanosoma cruzi (strain CL Brener) GN=Tc00.1047053504013.60 PE=4 SV=1	1	16	1	1	47	10	9	13	15	0	0	1	1	0	0	1	1	31.4	2.3	2.3	62.8	558	558	1	6	0	29755	By matching	By matching	By matching	By matching	By MS/MS	By MS/MS	19.9	18.6	16.1	15.6	25.4	28.3	384520000	0	0	144860000	239670000
tr|Q4E4L7|Q4E4L7_TRYCC	tr|Q4E4L7|Q4E4L7_TRYCC	13	12	12	>tr|Q4E4L7|Q4E4L7_TRYCC Isocitrate dehydrogenase [NADP] OS=Trypanosoma cruzi (strain CL Brener) GN=Tc00.1047053506925.319 PE=3 SV=1	1	13	12	12	46	10	12	13	11	9	11	12	10	9	11	12	10	37.8	35.4	35.4	46858	413	413	1	179	0	255.94	By MS/MS	By MS/MS	By MS/MS	By MS/MS	By MS/MS	By MS/MS	27.4	31	35.1	28.3	37.8	35.8	15706000000	2511300000	3575800000	2609700000	3519700000
tr|Q4E3F7|Q4E3F7_TRYCC;tr|Q4DQI9|Q4DQI9_TRYCC;tr|Q4E156|Q4E156_TRYCC	tr|Q4E3F7|Q4E3F7_TRYCC	15;6;6	15;6;6	15;6;6	>tr|Q4E3F7|Q4E3F7_TRYCC Protein disulfide-isomerase OS=Trypanosoma cruzi (strain CL Brener) GN=Tc00.1047053507611.370 PE=3 SV=1	3	15	15	15	46	10	11	12	13	10	11	12	13	10	11	12	13	39.1	39.1	39.1	53548	481	481;181;209	1	165	0	108.73	By MS/MS	By MS/MS	By MS/MS	By MS/MS	By MS/MS	By MS/MS	28.5	31.6	25.4	24.5	30.6	32.8	15454000000	2489200000	2795000000	3011000000	4148000000
tr|Q4DZT8|Q4DZT8_TRYCC	tr|Q4DZT8|Q4DZT8_TRYCC	14	4	4	>tr|Q4DZT8|Q4DZT8_TRYCC Acetyltransferase component of pyruvate dehydrogenase complex OS=Trypanosoma cruzi (strain CL Brener) GN=Tc00.1047053510105.170 PE=3 SV=1	1	14	4	4	46	11	11	14	10	4	4	4	3	4	4	4	3	37.6	16.1	16.1	49689	471	471	1	56	0	39652	By MS/MS	By MS/MS	By MS/MS	By MS/MS	By MS/MS	By MS/MS	28.2	28.2	27.6	27.2	37.6	22.1	4573200000	1072400000	1088600000	477270000	726560000
tr|Q4CXE3|Q4CXE3_TRYCC	tr|Q4CXE3|Q4CXE3_TRYCC	13	3	3	>tr|Q4CXE3|Q4CXE3_TRYCC Phenylalanyl-tRNA synthetase, putative OS=Trypanosoma cruzi (strain CL Brener) GN=Tc00.1047053508271.10 PE=4 SV=1	1	13	3	3	46	12	11	12	11	3	2	3	2	3	2	3	2	27.2	10.7	10.7	70792	625	625	1	39	0	59142	By MS/MS	By MS/MS	By MS/MS	By MS/MS	By MS/MS	By MS/MS	27.2	19.7	21	17.6	27.2	22.4	1623300000	313160000	314520000	313130000	411630000
tr|Q4DKM0|Q4DKM0_TRYCC	tr|Q4DKM0|Q4DKM0_TRYCC	15	10	3	>tr|Q4DKM0|Q4DKM0_TRYCC Retrotransposon hot spot (RHS) protein, putative OS=Trypanosoma cruzi (strain CL Brener) GN=Tc00.1047053506843.40 PE=4 SV=1	1	15	10	3	46	10	11	14	11	6	7	9	8	2	2	2	1	16.6	12.7	4.7	111.15	974	974	1	61	0	23323	By MS/MS	By MS/MS	By MS/MS	By MS/MS	By MS/MS	By MS/MS	10.4	11.6	8.5	7.6	15.2	11.4	2170400000	368380000	451580000	296890000	576550000
tr|Q4DUG1|Q4DUG1_TRYCC;tr|Q4D8I3|Q4D8I3_TRYCC	tr|Q4DUG1|Q4DUG1_TRYCC	15;5	15;5	15;5	>tr|Q4DUG1|Q4DUG1_TRYCC Uncharacterized protein OS=Trypanosoma cruzi (strain CL Brener) GN=Tc00.1047053508837.80 PE=4 SV=1	2	15	15	15	46	14	10	12	10	14	10	12	10	14	10	12	10	7.7	7.7	7.7	436.03	3828	3828;2155	1	176	0	98368	By MS/MS	By MS/MS	By MS/MS	By MS/MS	By MS/MS	By MS/MS	7.3	5.7	7.6	7.4	6.2	5.5	6960400000	1263400000	1408200000	879480000	1387300000
tr|Q4DUD6|Q4DUD6_TRYCC	tr|Q4DUD6|Q4DUD6_TRYCC	15	15	15	>tr|Q4DUD6|Q4DUD6_TRYCC Inositol 5-phosphatase 1, putative OS=Trypanosoma cruzi (strain CL Brener) GN=Tc00.1047053506625.60 PE=4 SV=1	1	15	15	15	46	10	12	12	12	10	12	12	12	10	12	12	12	8.2	8.2	8.2	298.6	2561	2561	1	102	0	36877	By MS/MS	By MS/MS	By MS/MS	By MS/MS	By MS/MS	By MS/MS	5.7	5.7	2.2	4.2	5.7	6.5	2543400000	480300000	647950000	269570000	879550000
tr|Q4DWV8|Q4DWV8_TRYCC	tr|Q4DWV8|Q4DWV8_TRYCC	13	1	1	>tr|Q4DWV8|Q4DWV8_TRYCC Glutamate dehydrogenase OS=Trypanosoma cruzi (strain CL Brener) GN=Tc00.1047053507875.20 PE=3 SV=1	1	13	1	1	46	12	10	12	12	0	0	1	1	0	0	1	1	36.1	4.1	4.1	45221	416	416	1	2	0	19484	By matching	By matching	By matching	By matching	By MS/MS	By MS/MS	32	26.9	25.2	28.6	34.4	34.4	0	0	0	0	0
tr|Q4DJB6|Q4DJB6_TRYCC	tr|Q4DJB6|Q4DJB6_TRYCC	12	12	12	>tr|Q4DJB6|Q4DJB6_TRYCC 14-3-3 protein, putative OS=Trypanosoma cruzi (strain CL Brener) GN=Tc00.1047053508851.180 PE=3 SV=1	1	12	12	12	45	11	11	11	12	11	11	11	12	11	11	11	12	56.9	56.9	56.9	29965	262	262	1	178	0	194.41	By MS/MS	By MS/MS	By MS/MS	By MS/MS	By MS/MS	By MS/MS	54.2	54.2	56.9	45	54.2	56.9	22218000000	3032400000	5177000000	4314100000	6191400000
tr|Q4DFA6|Q4DFA6_TRYCC	tr|Q4DFA6|Q4DFA6_TRYCC	13	13	6	>tr|Q4DFA6|Q4DFA6_TRYCC Protein disulfide isomerase, putative OS=Trypanosoma cruzi (strain CL Brener) GN=Tc00.1047053508209.140 PE=3 SV=1	1	13	13	6	45	9	10	13	13	9	10	13	13	4	5	6	6	39.6	39.6	22.6	41801	376	376	1	194	0	216.04	By MS/MS	By MS/MS	By MS/MS	By MS/MS	By MS/MS	By MS/MS	26.9	31.4	31.9	26.9	39.6	39.6	21753000000	3921100000	5206000000	3082600000	4902400000
tr|Q4DX68|Q4DX68_TRYCC	tr|Q4DX68|Q4DX68_TRYCC	13	13	13	>tr|Q4DX68|Q4DX68_TRYCC Uncharacterized protein OS=Trypanosoma cruzi (strain CL Brener) GN=Tc00.1047053506945.320 PE=4 SV=1	1	13	13	13	45	10	10	13	12	10	10	13	12	10	10	13	12	35.1	35.1	35.1	51673	453	453	1	194	0	251.7	By MS/MS	By MS/MS	By MS/MS	By MS/MS	By MS/MS	By MS/MS	26	27.6	29.8	29.8	35.1	32.7	9481800000	1442200000	2222700000	1181900000	2352100000
sp|Q7Z1V1|CP51_TRYCC	sp|Q7Z1V1|CP51_TRYCC	13	13	13	>sp|Q7Z1V1|CP51_TRYCC Sterol 14-alpha demethylase OS=Trypanosoma cruzi (strain CL Brener) GN=CYP51 PE=1 SV=1	1	13	13	13	45	9	11	12	13	9	11	12	13	9	11	12	13	35.3	35.3	35.3	54682	481	481	1	154	0	236.81	By MS/MS	By MS/MS	By MS/MS	By MS/MS	By MS/MS	By MS/MS	24.1	31	22.9	22.9	33.7	35.3	10113000000	1342200000	1797500000	2165300000	3879400000
tr|Q4DE50|Q4DE50_TRYCC;tr|Q4D7F2|Q4D7F2_TRYCC	tr|Q4DE50|Q4DE50_TRYCC;tr|Q4D7F2|Q4D7F2_TRYCC	14;14	14;14	14;14	>tr|Q4DE50|Q4DE50_TRYCC Eukaryotic translation initiation factor 3 subunit E OS=Trypanosoma cruzi (strain CL Brener) GN=Tc00.1047053508699.40 PE=3 SV=1;>tr|Q4D7F2|Q4D7F2_TRYCC Eukaryotic translation initiation factor 3 subunit E OS=Trypanosoma cruzi (strai	2	14	14	14	45	9	10	14	12	9	10	14	12	9	10	14	12	37.6	37.6	37.6	46257	407	407;407	1	137	0	121.52	By MS/MS	By MS/MS	By MS/MS	By MS/MS	By MS/MS	By MS/MS	26	29.2	21.4	21.9	37.6	33.9	5627500000	995990000	1089500000	981410000	1645200000
tr|Q4DGT4|Q4DGT4_TRYCC	tr|Q4DGT4|Q4DGT4_TRYCC	14	10	7	>tr|Q4DGT4|Q4DGT4_TRYCC Retrotransposon hot spot (RHS) protein, putative OS=Trypanosoma cruzi (strain CL Brener) GN=Tc00.1047053509265.10 PE=4 SV=1	1	14	10	7	45	10	9	14	12	7	5	10	9	5	3	7	7	29.1	22.3	18.4	67054	592	592	1	98	0	40391	By MS/MS	By MS/MS	By MS/MS	By MS/MS	By MS/MS	By MS/MS	20.9	18.1	16	15.9	29.1	26.9	6058900000	1094300000	1464800000	956580000	1364400000
tr|Q4DIN9|Q4DIN9_TRYCC	tr|Q4DIN9|Q4DIN9_TRYCC	13	8	8	>tr|Q4DIN9|Q4DIN9_TRYCC Uncharacterized protein OS=Trypanosoma cruzi (strain CL Brener) GN=Tc00.1047053508045.70 PE=4 SV=1	1	13	8	8	45	11	11	11	12	7	8	8	8	7	8	8	8	30.9	18.8	18.8	50024	457	457	1	103	0	205.54	By MS/MS	By MS/MS	By MS/MS	By MS/MS	By MS/MS	By MS/MS	26.7	25.2	26.7	25.2	25.2	29.3	4840800000	757810000	1164800000	825360000	1374100000
tr|Q4CSE1|Q4CSE1_TRYCC	tr|Q4CSE1|Q4CSE1_TRYCC	15	15	2	>tr|Q4CSE1|Q4CSE1_TRYCC Eukaryotic translation initiation factor 5, putative OS=Trypanosoma cruzi (strain CL Brener) GN=Tc00.1047053504119.10 PE=4 SV=1	1	15	15	2	45	8	9	15	13	8	9	15	13	1	0	2	2	48	48	9.5	42881	379	379	1	127	0	199.3	By MS/MS	By MS/MS	By MS/MS	By MS/MS	By MS/MS	By MS/MS	27.4	28	25.9	21.9	48	41.7	5751200000	728000000	1137000000	1106500000	2018500000
tr|Q4CYH6|Q4CYH6_TRYCC	tr|Q4CYH6|Q4CYH6_TRYCC	14	14	7	>tr|Q4CYH6|Q4CYH6_TRYCC Uncharacterized protein OS=Trypanosoma cruzi (strain CL Brener) GN=Tc00.1047053508321.40 PE=4 SV=1	1	14	14	7	45	10	10	12	13	10	10	12	13	3	4	5	7	30.6	30.6	21.4	126.12	1152	1152	1	149	0	323.31	By MS/MS	By MS/MS	By MS/MS	By MS/MS	By MS/MS	By MS/MS	25.3	26.2	21.3	22.2	27.7	28.6	9574800000	1494300000	1864000000	1535700000	2909800000
tr|Q4DQZ8|Q4DQZ8_TRYCC	tr|Q4DQZ8|Q4DQZ8_TRYCC	13	13	1	>tr|Q4DQZ8|Q4DQZ8_TRYCC Uncharacterized protein OS=Trypanosoma cruzi (strain CL Brener) GN=Tc00.1047053510089.110 PE=4 SV=1	1	13	13	1	45	8	11	13	13	8	11	13	13	1	1	1	1	24.4	24.4	3.6	72302	661	661	1	120	0	37867	By MS/MS	By MS/MS	By MS/MS	By MS/MS	By MS/MS	By MS/MS	16.3	20.7	12.7	17.9	24.4	24.4	6969100000	960470000	1475000000	1269600000	2250000000
tr|Q4CMQ4|Q4CMQ4_TRYCC;tr|Q4CMQ5|Q4CMQ5_TRYCC	tr|Q4CMQ4|Q4CMQ4_TRYCC	12;4	5;3	5;3	>tr|Q4CMQ4|Q4CMQ4_TRYCC Carboxypeptidase OS=Trypanosoma cruzi (strain CL Brener) GN=Tc00.1047053508671.20 PE=3 SV=1	2	12	5	5	45	10	11	12	12	3	4	5	5	3	4	5	5	33.4	12.8	12.8	59518	530	530;132	1	44	0	25616	By MS/MS	By MS/MS	By MS/MS	By MS/MS	By MS/MS	By MS/MS	24.9	29.2	24.9	24.9	33.4	33.4	3112100000	359090000	624840000	545100000	1105400000
tr|Q4D6H1|Q4D6H1_TRYCC;tr|Q4CW30|Q4CW30_TRYCC	tr|Q4D6H1|Q4D6H1_TRYCC;tr|Q4CW30|Q4CW30_TRYCC	14;14	14;14	14;14	>tr|Q4D6H1|Q4D6H1_TRYCC Oligopeptidase B, putative OS=Trypanosoma cruzi (strain CL Brener) GN=Tc00.1047053511557.10 PE=4 SV=1;>tr|Q4CW30|Q4CW30_TRYCC Oligopeptidase B, putative OS=Trypanosoma cruzi (strain CL Brener) GN=Tc00.1047053503995.50 PE=4 SV=1	2	14	14	14	45	8	10	14	13	8	10	14	13	8	10	14	13	23.1	23.1	23.1	81073	714	714;714	1	117	0	41936	By MS/MS	By MS/MS	By MS/MS	By MS/MS	By MS/MS	By MS/MS	11.1	13.6	10.4	9.1	23.1	21.1	4845200000	857310000	1020900000	728600000	1291700000
tr|Q4DZE6|Q4DZE6_TRYCC	tr|Q4DZE6|Q4DZE6_TRYCC	13	13	2	>tr|Q4DZE6|Q4DZE6_TRYCC Lanosterol synthase, putative OS=Trypanosoma cruzi (strain CL Brener) GN=Tc00.1047053506825.170 PE=3 SV=1	1	13	13	2	45	11	11	11	12	11	11	11	12	2	2	2	2	18.8	18.8	3.3	102.47	902	902	1	137	0	36128	By MS/MS	By MS/MS	By MS/MS	By MS/MS	By MS/MS	By MS/MS	15	16.3	10.5	11.6	16.3	17.4	4731800000	816800000	1282700000	702530000	1227500000
tr|Q4DZP3|Q4DZP3_TRYCC;tr|Q4DBW4|Q4DBW4_TRYCC	tr|Q4DZP3|Q4DZP3_TRYCC	14;4	14;4	14;4	>tr|Q4DZP3|Q4DZP3_TRYCC Uncharacterized protein OS=Trypanosoma cruzi (strain CL Brener) GN=Tc00.1047053504147.10 PE=4 SV=1	2	14	14	14	45	12	10	12	11	12	10	12	11	12	10	12	11	23.2	23.2	23.2	98963	883	883;297	1	158	0	323.31	By MS/MS	By MS/MS	By MS/MS	By MS/MS	By MS/MS	By MS/MS	20.8	16.9	19.7	18.8	21.2	18.3	3850200000	676520000	723430000	605720000	1037000000
tr|Q4DSI2|Q4DSI2_TRYCC;tr|Q4DM58|Q4DM58_TRYCC	tr|Q4DSI2|Q4DSI2_TRYCC	14;3	8;0	5;0	>tr|Q4DSI2|Q4DSI2_TRYCC Retrotransposon hot spot (RHS) protein, putative OS=Trypanosoma cruzi (strain CL Brener) GN=Tc00.1047053503861.10 PE=4 SV=1	2	14	8	5	45	9	10	14	12	4	4	8	7	3	3	5	5	20.5	13.1	9	107.72	946	946;467	1	61	0	70936	By MS/MS	By MS/MS	By MS/MS	By MS/MS	By MS/MS	By MS/MS	13.8	14.9	12.8	8.8	20.5	18.4	3290700000	483130000	622690000	688330000	1128800000
tr|Q4D1V4|Q4D1V4_TRYCC;tr|Q4CV32|Q4CV32_TRYCC;tr|Q4CKR2|Q4CKR2_TRYCC	tr|Q4D1V4|Q4D1V4_TRYCC	14;1;1	5;1;1	3;0;0	>tr|Q4D1V4|Q4D1V4_TRYCC Retrotransposon hot spot (RHS) protein, putative OS=Trypanosoma cruzi (strain CL Brener) GN=Tc00.1047053508401.20 PE=4 SV=1	3	14	5	3	45	11	10	12	12	3	3	4	4	1	1	2	2	17.2	6.6	4.7	110.73	979	979;162;321	1	42	0	86732	By MS/MS	By MS/MS	By MS/MS	By MS/MS	By MS/MS	By MS/MS	12.1	9.9	11	10.1	13.9	15	490050000	94384000	132540000	100200000	98384000
tr|Q4CKM6|Q4CKM6_TRYCC	tr|Q4CKM6|Q4CKM6_TRYCC	14	3	3	>tr|Q4CKM6|Q4CKM6_TRYCC ATP-dependent DEAD/H RNA helicase, putative (Fragment) OS=Trypanosoma cruzi (strain CL Brener) GN=Tc00.1047053468941.9 PE=4 SV=1	1	14	3	3	45	9	10	13	13	0	0	3	3	0	0	3	3	42.7	7.7	7.7	51559	452	452	1	14	0	21923	By matching	By matching	By MS/MS	By MS/MS	By MS/MS	By MS/MS	28.8	31.4	27.9	27	42.7	39.2	114810000	0	0	44615000	70196000
tr|Q4D7Y4|Q4D7Y4_TRYCC;tr|Q4D3A7|Q4D3A7_TRYCC;tr|Q4D3A5|Q4D3A5_TRYCC	tr|Q4D7Y4|Q4D7Y4_TRYCC;tr|Q4D3A7|Q4D3A7_TRYCC;tr|Q4D3A5|Q4D3A5_TRYCC	13;12;11	13;12;11	13;12;11	>tr|Q4D7Y4|Q4D7Y4_TRYCC Kinetoplastid membrane protein KMP-11, putative OS=Trypanosoma cruzi (strain CL Brener) GN=Tc00.1047053510755.89 PE=4 SV=1;>tr|Q4D3A7|Q4D3A7_TRYCC Kinetoplastid membrane protein KMP-11 OS=Trypanosoma cruzi (strain CL Brener) GN=Tc00	3	13	13	13	44	12	10	10	12	12	10	10	12	12	10	10	12	88	88	88	11011	92	92;91;76	1	199	0	323.31	By MS/MS	By MS/MS	By MS/MS	By MS/MS	By MS/MS	By MS/MS	70.7	70.7	62	70.7	77.2	88	106700000000	19446000000	23962000000	12930000000	25024000000
tr|Q4CLW8|Q4CLW8_TRYCC	tr|Q4CLW8|Q4CLW8_TRYCC	13	13	1	>tr|Q4CLW8|Q4CLW8_TRYCC Methyltransferase OS=Trypanosoma cruzi (strain CL Brener) GN=Tc00.1047053505683.10 PE=3 SV=1	1	13	13	1	44	9	11	11	13	9	11	11	13	1	1	1	1	43.7	43.7	4.2	40453	359	359	1	248	0	323.31	By MS/MS	By MS/MS	By MS/MS	By MS/MS	By MS/MS	By MS/MS	25.1	35.4	27.6	35.4	35.4	43.7	23773000000	4410400000	6115800000	3723500000	6512600000
tr|Q4CL00|Q4CL00_TRYCC	tr|Q4CL00|Q4CL00_TRYCC	12	4	4	>tr|Q4CL00|Q4CL00_TRYCC Calpain-like cysteine peptidase, putative (Fragment) OS=Trypanosoma cruzi (strain CL Brener) GN=Tc00.1047053510957.9 PE=4 SV=1	1	12	4	4	44	10	11	11	12	4	4	4	4	4	4	4	4	43.3	22.9	22.9	40308	349	349	1	79	0	232.34	By MS/MS	By MS/MS	By MS/MS	By MS/MS	By MS/MS	By MS/MS	40.1	40.1	40.1	40.1	41.3	43.3	6962700000	1210700000	1916100000	744220000	1196300000
tr|Q4CK86|Q4CK86_TRYCC	tr|Q4CK86|Q4CK86_TRYCC	13	1	1	>tr|Q4CK86|Q4CK86_TRYCC Heat shock protein 70 (HSP70), putative (Fragment) OS=Trypanosoma cruzi (strain CL Brener) GN=Tc00.1047053418069.10 PE=3 SV=1	1	13	1	1	44	10	10	11	13	1	1	1	1	1	1	1	1	80	5.7	5.7	15434	140	140	1	11	0.0091714	13239	By MS/MS	By MS/MS	By matching	By MS/MS	By MS/MS	By MS/MS	52.9	52.9	52.9	58.6	69.3	80	1888700000	406580000	503510000	213010000	335210000
tr|Q4DEQ3|Q4DEQ3_TRYCC;tr|Q4DCI5|Q4DCI5_TRYCC	tr|Q4DEQ3|Q4DEQ3_TRYCC;tr|Q4DCI5|Q4DCI5_TRYCC	13;13	13;13	13;13	>tr|Q4DEQ3|Q4DEQ3_TRYCC Prohibitin, putative OS=Trypanosoma cruzi (strain CL Brener) GN=Tc00.1047053506295.130 PE=4 SV=1;>tr|Q4DCI5|Q4DCI5_TRYCC Prohibitin, putative OS=Trypanosoma cruzi (strain CL Brener) GN=Tc00.1047053511469.70 PE=4 SV=1	2	13	13	13	44	8	12	12	12	8	12	12	12	8	12	12	12	50	50	50	33233	306	306;306	1	122	0	125.25	By MS/MS	By MS/MS	By MS/MS	By MS/MS	By MS/MS	By MS/MS	31.7	45.4	39.9	28.8	47.4	47.4	5474700000	701290000	1110000000	1265700000	1516000000
tr|Q4E396|Q4E396_TRYCC;tr|Q4D6N7|Q4D6N7_TRYCC	tr|Q4E396|Q4E396_TRYCC;tr|Q4D6N7|Q4D6N7_TRYCC	14;7	14;7	14;7	>tr|Q4E396|Q4E396_TRYCC Uncharacterized protein OS=Trypanosoma cruzi (strain CL Brener) GN=Tc00.1047053508355.330 PE=4 SV=1;>tr|Q4D6N7|Q4D6N7_TRYCC Uncharacterized protein (Fragment) OS=Trypanosoma cruzi (strain CL Brener) GN=Tc00.1047053508357.9 PE=4 SV=1	2	14	14	14	44	9	10	12	13	9	10	12	13	9	10	12	13	25.9	25.9	25.9	59183	517	517;262	1	123	0	60387	By MS/MS	By MS/MS	By MS/MS	By MS/MS	By MS/MS	By MS/MS	14.3	17.8	14.3	14.3	22.4	22.4	7934700000	1324400000	1343200000	1092500000	2504600000
tr|Q4E5P0|Q4E5P0_TRYCC;tr|Q4E2N8|Q4E2N8_TRYCC	tr|Q4E5P0|Q4E5P0_TRYCC;tr|Q4E2N8|Q4E2N8_TRYCC	13;12	13;12	0;0	>tr|Q4E5P0|Q4E5P0_TRYCC Alanine aminotransferase, putative OS=Trypanosoma cruzi (strain CL Brener) GN=Tc00.1047053506529.420 PE=4 SV=1;>tr|Q4E2N8|Q4E2N8_TRYCC Alanine aminotransferase, putative OS=Trypanosoma cruzi (strain CL Brener) GN=Tc00.1047053510889.	2	13	13	0	44	10	8	13	13	10	8	13	13	0	0	0	0	35.1	35.1	0	54421	493	493;493	1	138	0	107.5	By MS/MS	By MS/MS	By MS/MS	By MS/MS	By MS/MS	By MS/MS	29	22.1	21.1	13.8	35.1	35.1	7793700000	937560000	865680000	1827500000	3013400000
tr|Q4CLP3|Q4CLP3_TRYCC	tr|Q4CLP3|Q4CLP3_TRYCC	12	2	2	>tr|Q4CLP3|Q4CLP3_TRYCC Succinyl-CoA ligase [GDP-forming] beta-chain, putative (Fragment) OS=Trypanosoma cruzi (strain CL Brener) GN=Tc00.1047053507767.10 PE=4 SV=1	1	12	2	2	44	10	10	12	12	2	2	2	2	2	2	2	2	43.9	7.2	7.2	34533	319	319	1	25	0	66508	By MS/MS	By MS/MS	By MS/MS	By MS/MS	By MS/MS	By MS/MS	35.1	35.1	31	31	43.9	43.9	3070700000	450660000	654470000	525390000	705630000
tr|Q4DGJ5|Q4DGJ5_TRYCC	tr|Q4DGJ5|Q4DGJ5_TRYCC	15	15	4	>tr|Q4DGJ5|Q4DGJ5_TRYCC Obg-like ATPase 1 OS=Trypanosoma cruzi (strain CL Brener) GN=Tc00.1047053511625.50 PE=3 SV=1	1	15	15	4	44	8	10	13	13	8	10	13	13	1	3	4	2	52	52	16.5	44.35	394	394	1	126	0	53306	By MS/MS	By MS/MS	By MS/MS	By MS/MS	By MS/MS	By MS/MS	27.4	33.2	27.4	30.7	43.4	43.7	4858600000	652850000	830470000	1012700000	1686000000
tr|Q4CMB7|Q4CMB7_TRYCC;tr|Q4CM63|Q4CM63_TRYCC;tr|Q4CMB6|Q4CMB6_TRYCC	tr|Q4CMB7|Q4CMB7_TRYCC;tr|Q4CM63|Q4CM63_TRYCC	13;11;4	1;1;1	1;1;1	>tr|Q4CMB7|Q4CMB7_TRYCC Methyltransferase OS=Trypanosoma cruzi (strain CL Brener) GN=Tc00.1047053504191.10 PE=3 SV=1;>tr|Q4CM63|Q4CM63_TRYCC Methyltransferase (Fragment) OS=Trypanosoma cruzi (strain CL Brener) GN=Tc00.1047053510185.10 PE=3 SV=1	3	13	1	1	44	9	11	11	13	1	1	1	1	1	1	1	1	43.7	4.2	4.2	40391	359	359;310;161	1	23	0	36448	By MS/MS	By MS/MS	By matching	By MS/MS	By MS/MS	By MS/MS	25.1	35.4	27.6	35.4	35.4	43.7	1700700000	360290000	464430000	167980000	479850000
tr|Q4CZV4|Q4CZV4_TRYCC	tr|Q4CZV4|Q4CZV4_TRYCC	14	12	8	>tr|Q4CZV4|Q4CZV4_TRYCC Retrotransposon hot spot (RHS) protein, putative (Fragment) OS=Trypanosoma cruzi (strain CL Brener) GN=Tc00.1047053509903.5 PE=4 SV=1	1	14	12	8	44	10	10	13	11	9	9	11	10	6	6	7	6	42.7	39.1	22.9	51424	445	445	1	130	0	112.44	By MS/MS	By MS/MS	By MS/MS	By MS/MS	By MS/MS	By MS/MS	33	34.6	37.3	32.4	42.7	36	3073100000	456650000	563630000	675540000	942580000
tr|Q4E3M4|Q4E3M4_TRYCC	tr|Q4E3M4|Q4E3M4_TRYCC	14	14	2	>tr|Q4E3M4|Q4E3M4_TRYCC Uncharacterized protein OS=Trypanosoma cruzi (strain CL Brener) GN=Tc00.1047053510101.380 PE=4 SV=1	1	14	14	2	44	10	10	11	13	10	10	11	13	2	2	2	2	21.5	21.5	4.6	108.63	969	969	1	108	0	45684	By MS/MS	By MS/MS	By MS/MS	By MS/MS	By MS/MS	By MS/MS	16.4	14	15.6	15.6	18.6	20.1	2972000000	497140000	493160000	476320000	813060000
tr|Q4DZB0|Q4DZB0_TRYCC	tr|Q4DZB0|Q4DZB0_TRYCC	14	1	1	>tr|Q4DZB0|Q4DZB0_TRYCC Eukaryotic translation initiation factor 5, putative OS=Trypanosoma cruzi (strain CL Brener) GN=Tc00.1047053504105.20 PE=4 SV=1	1	14	1	1	44	8	10	14	12	1	1	1	1	1	1	1	1	44.3	5.8	5.8	42824	379	379	1	18	0	90.57	By MS/MS	By MS/MS	By MS/MS	By matching	By MS/MS	By MS/MS	27.4	33.8	25.9	16.1	44.3	38	829510000	34045000	236260000	145620000	395070000
tr|Q4E0D7|Q4E0D7_TRYCC	tr|Q4E0D7|Q4E0D7_TRYCC	14	1	1	>tr|Q4E0D7|Q4E0D7_TRYCC Calpain-like cysteine peptidase, putative OS=Trypanosoma cruzi (strain CL Brener) GN=Tc00.1047053508999.200 PE=3 SV=1	1	14	1	1	44	9	10	13	12	1	1	1	0	1	1	1	0	31.2	1.4	1.4	78099	692	692	1	5	1	-2	By MS/MS	By matching	By matching	By matching	By MS/MS	By matching	17.2	19.7	19.7	15.8	27.5	25.3	86139000	18762000	51747000	0	0
tr|Q4DXR8|Q4DXR8_TRYCC	tr|Q4DXR8|Q4DXR8_TRYCC	13	1	1	>tr|Q4DXR8|Q4DXR8_TRYCC Uncharacterized protein OS=Trypanosoma cruzi (strain CL Brener) GN=Tc00.1047053510421.130 PE=4 SV=1	1	13	1	1	44	8	10	13	13	1	0	1	1	1	0	1	1	24.4	3.6	3.6	72311	661	661	1	4	0.0034376	18012	By matching	By matching	By matching	By matching	By MS/MS	By matching	16.3	17.1	12.7	14.2	24.4	24.4	154480000	31458000	0	33940000	89084000
tr|Q4CQB8|Q4CQB8_TRYCC;tr|Q4CPL7|Q4CPL7_TRYCC	tr|Q4CQB8|Q4CQB8_TRYCC	15;2	4;1	3;0	>tr|Q4CQB8|Q4CQB8_TRYCC Retrotransposon hot spot (RHS) protein, putative OS=Trypanosoma cruzi (strain CL Brener) GN=Tc00.1047053509335.10 PE=4 SV=1	2	15	4	3	44	10	11	11	12	2	2	2	1	2	1	2	1	21.1	6.3	4.8	113.62	997	997;400	1	14	0	50906	By MS/MS	By MS/MS	By MS/MS	By MS/MS	By MS/MS	By matching	12	13.9	10.6	9.6	15.1	15.9	196090000	36953000	74075000	21267000	36956000
tr|Q4E5N8|Q4E5N8_TRYCC	tr|Q4E5N8|Q4E5N8_TRYCC	13	1	1	>tr|Q4E5N8|Q4E5N8_TRYCC Alanine aminotransferase, putative OS=Trypanosoma cruzi (strain CL Brener) GN=Tc00.1047053506529.430 PE=4 SV=1	1	13	1	1	44	10	8	13	13	1	0	1	1	1	0	1	1	34.8	2.4	2.4	54993	497	497	1	6	0.0091569	13166	By matching	By matching	By matching	By matching	By MS/MS	By MS/MS	28.8	21.9	20.9	13.7	34.8	34.8	391000000	6806400	0	126880000	243920000
tr|Q4DD13|Q4DD13_TRYCC	tr|Q4DD13|Q4DD13_TRYCC	11	11	3	>tr|Q4DD13|Q4DD13_TRYCC ADP,ATP carrier protein 1, mitochondrial, putative OS=Trypanosoma cruzi (strain CL Brener) GN=Tc00.1047053511289.70 PE=3 SV=1	1	11	11	3	43	10	11	11	11	10	11	11	11	2	3	3	3	36.6	36.6	11.8	34971	314	314	1	128	0	73462	By MS/MS	By MS/MS	By MS/MS	By MS/MS	By MS/MS	By MS/MS	36.6	36.6	31.2	36.6	36.6	36.6	22442000000	3300500000	4267400000	3998800000	7659200000
tr|Q4DQC4|Q4DQC4_TRYCC	tr|Q4DQC4|Q4DQC4_TRYCC	13	13	4	>tr|Q4DQC4|Q4DQC4_TRYCC Uncharacterized protein OS=Trypanosoma cruzi (strain CL Brener) GN=Tc00.1047053506629.200 PE=4 SV=1	1	13	13	4	43	10	9	12	12	10	9	12	12	2	2	3	4	44.4	44.4	18.4	37.49	331	331	1	145	0	44487	By MS/MS	By MS/MS	By MS/MS	By MS/MS	By MS/MS	By MS/MS	32	28.4	28.4	28.4	37.2	44.4	18366000000	2709100000	4344200000	2733500000	4149500000
tr|Q4D4X1|Q4D4X1_TRYCC;tr|Q4D4H1|Q4D4H1_TRYCC	tr|Q4D4X1|Q4D4X1_TRYCC	14;2	14;2	14;2	>tr|Q4D4X1|Q4D4X1_TRYCC Succinate dehydrogenase [ubiquinone] flavoprotein subunit, mitochondrial OS=Trypanosoma cruzi (strain CL Brener) GN=Tc00.1047053511909.40 PE=3 SV=1	2	14	14	14	43	8	8	13	14	8	8	13	14	8	8	13	14	36.8	36.8	36.8	66903	609	609;167	1	136	0	78002	By MS/MS	By MS/MS	By MS/MS	By MS/MS	By MS/MS	By MS/MS	20.5	20.2	14.1	14.1	34.5	36.8	14300000000	2353700000	3062400000	2783700000	4117900000
tr|Q4DFM4|Q4DFM4_TRYCC;tr|Q4DGN8|Q4DGN8_TRYCC	tr|Q4DFM4|Q4DFM4_TRYCC;tr|Q4DGN8|Q4DGN8_TRYCC	12;12	12;12	12;12	>tr|Q4DFM4|Q4DFM4_TRYCC Heterogeneous nuclear ribonucleoprotein H/F, putative OS=Trypanosoma cruzi (strain CL Brener) GN=Tc00.1047053511109.130 PE=4 SV=1;>tr|Q4DGN8|Q4DGN8_TRYCC Heterogeneous nuclear ribonucleoprotein H/F, putative OS=Trypanosoma cruzi (st	2	12	12	12	43	10	12	10	11	10	12	10	11	10	12	10	11	33.3	33.3	33.3	49954	448	448;450	1	141	0	64986	By MS/MS	By MS/MS	By MS/MS	By MS/MS	By MS/MS	By MS/MS	24.3	33.3	21.2	14.3	28.8	29	7295400000	1240300000	1630100000	897580000	1789200000
tr|Q4D0L7|Q4D0L7_TRYCC	tr|Q4D0L7|Q4D0L7_TRYCC	14	6	6	>tr|Q4D0L7|Q4D0L7_TRYCC Heat shock protein, putative (Fragment) OS=Trypanosoma cruzi (strain CL Brener) GN=Tc00.1047053506301.11 PE=4 SV=1	1	14	6	6	43	8	8	13	14	4	3	6	6	4	3	6	6	56.2	32.1	32.1	37.8	349	349	1	72	0	103.8	By MS/MS	By MS/MS	By MS/MS	By MS/MS	By MS/MS	By MS/MS	34.1	32.7	33.2	33.2	53.9	56.2	5906200000	997090000	1100900000	938860000	1663700000
tr|Q4E568|Q4E568_TRYCC;tr|Q4DWL5|Q4DWL5_TRYCC	tr|Q4E568|Q4E568_TRYCC;tr|Q4DWL5|Q4DWL5_TRYCC	13;13	13;13	13;13	>tr|Q4E568|Q4E568_TRYCC Paraflagellar rod component, putative OS=Trypanosoma cruzi (strain CL Brener) GN=Tc00.1047053510359.20 PE=4 SV=1;>tr|Q4DWL5|Q4DWL5_TRYCC Paraflagellar rod component, putative OS=Trypanosoma cruzi (strain CL Brener) GN=Tc00.104705350	2	13	13	13	43	10	11	11	11	10	11	11	11	10	11	11	11	27.2	27.2	27.2	68425	592	592;592	1	133	0	116.84	By MS/MS	By MS/MS	By MS/MS	By MS/MS	By MS/MS	By MS/MS	18.8	21.3	23	21.3	23	25.5	6587100000	1107100000	1648700000	625280000	1045000000
tr|Q4D1U2|Q4D1U2_TRYCC	tr|Q4D1U2|Q4D1U2_TRYCC	13	13	3	>tr|Q4D1U2|Q4D1U2_TRYCC Squalene monooxygenase, putative OS=Trypanosoma cruzi (strain CL Brener) GN=Tc00.1047053509589.20 PE=4 SV=1	1	13	13	3	43	11	9	11	12	11	9	11	12	2	1	3	3	25.9	25.9	6.5	63853	572	572	1	122	0	78386	By MS/MS	By MS/MS	By MS/MS	By MS/MS	By MS/MS	By MS/MS	22.9	20.3	15.7	17.3	23.1	25.7	5960200000	919680000	1140000000	923110000	2462200000
tr|Q4DSL1|Q4DSL1_TRYCC;tr|Q4CXT7|Q4CXT7_TRYCC	tr|Q4DSL1|Q4DSL1_TRYCC	13;3	13;3	13;3	>tr|Q4DSL1|Q4DSL1_TRYCC Translation initiation factor, putative OS=Trypanosoma cruzi (strain CL Brener) GN=Tc00.1047053511303.60 PE=4 SV=1	2	13	13	13	43	9	9	13	12	9	9	13	12	9	9	13	12	21.7	21.7	21.7	79859	696	696;178	1	154	0	62709	By MS/MS	By MS/MS	By MS/MS	By MS/MS	By MS/MS	By MS/MS	15.4	17	17.8	16.2	21.7	20.1	6231400000	836040000	1302300000	1189100000	1875800000
tr|Q4DRX1|Q4DRX1_TRYCC	tr|Q4DRX1|Q4DRX1_TRYCC	12	12	1	>tr|Q4DRX1|Q4DRX1_TRYCC Fumarate hydratase, putative OS=Trypanosoma cruzi (strain CL Brener) GN=Tc00.1047053507669.10 PE=4 SV=1	1	12	12	1	43	10	11	11	11	10	11	11	11	1	1	1	1	30.8	30.8	2.9	60832	555	555	1	136	0	51778	By MS/MS	By MS/MS	By MS/MS	By MS/MS	By MS/MS	By MS/MS	25.4	27.9	25.4	27.9	27.7	27.7	5484000000	736110000	1025900000	520500000	962510000
tr|Q4CLF8|Q4CLF8_TRYCC	tr|Q4CLF8|Q4CLF8_TRYCC	13	7	7	>tr|Q4CLF8|Q4CLF8_TRYCC Calpain-like cysteine peptidase, putative (Fragment) OS=Trypanosoma cruzi (strain CL Brener) GN=Tc00.1047053484311.10 PE=4 SV=1	1	13	7	7	43	12	10	11	10	6	5	6	5	6	5	6	5	30.9	20.1	20.1	72088	631	631	1	84	0	54.3	By MS/MS	By MS/MS	By MS/MS	By MS/MS	By MS/MS	By MS/MS	28.1	25.5	30.9	27.7	27.7	24.1	4132300000	695210000	993310000	454050000	722030000
tr|Q4DRP5|Q4DRP5_TRYCC	tr|Q4DRP5|Q4DRP5_TRYCC	15	15	5	>tr|Q4DRP5|Q4DRP5_TRYCC Uncharacterized protein OS=Trypanosoma cruzi (strain CL Brener) GN=Tc00.1047053509023.10 PE=4 SV=1	1	15	15	5	43	9	9	13	12	9	9	13	12	3	3	3	4	26.1	26.1	8.1	66429	582	582	1	122	0	34657	By MS/MS	By MS/MS	By MS/MS	By MS/MS	By MS/MS	By MS/MS	16.5	19.4	18.9	16.2	24.1	22.2	3881900000	666350000	615250000	635530000	1117700000
tr|Q4CYC6|Q4CYC6_TRYCC	tr|Q4CYC6|Q4CYC6_TRYCC	11	2	2	>tr|Q4CYC6|Q4CYC6_TRYCC Uncharacterized protein OS=Trypanosoma cruzi (strain CL Brener) GN=Tc00.1047053510679.40 PE=4 SV=1	1	11	2	2	43	11	10	11	11	2	1	2	2	2	1	2	2	29.2	5.7	5.7	52221	455	455	1	21	0	30634	By MS/MS	By matching	By MS/MS	By MS/MS	By MS/MS	By MS/MS	29.2	25.5	26.4	23.5	29.2	29.2	965730000	112820000	92234000	62114000	365410000
tr|Q4D7V1|Q4D7V1_TRYCC	tr|Q4D7V1|Q4D7V1_TRYCC	18	18	18	>tr|Q4D7V1|Q4D7V1_TRYCC Ubiquitin-protein ligase-like, putative OS=Trypanosoma cruzi (strain CL Brener) GN=Tc00.1047053508971.50 PE=4 SV=1	1	18	18	18	43	9	9	9	16	9	9	9	16	9	9	9	16	7.6	7.6	7.6	457	4125	4125	1	90	0	31852	By MS/MS	By MS/MS	By MS/MS	By MS/MS	By MS/MS	By MS/MS	3.1	2.8	2.7	2.2	3.2	7	2735800000	959010000	266970000	246070000	703860000
tr|Q4CYU3|Q4CYU3_TRYCC	tr|Q4CYU3|Q4CYU3_TRYCC	11	11	3	>tr|Q4CYU3|Q4CYU3_TRYCC Calpain-like cysteine peptidase, putative OS=Trypanosoma cruzi (strain CL Brener) GN=Tc00.1047053506983.39 PE=4 SV=1	1	11	11	3	42	10	10	11	11	10	10	11	11	3	3	3	3	86.8	86.8	42.1	12847	114	114	1	289	0	119.43	By MS/MS	By MS/MS	By MS/MS	By MS/MS	By MS/MS	By MS/MS	77.2	77.2	77.2	77.2	86.8	86.8	122700000000	19963000000	25839000000	15428000000	32072000000
tr|Q4DXL5|Q4DXL5_TRYCC;tr|Q4D4A0|Q4D4A0_TRYCC	tr|Q4DXL5|Q4DXL5_TRYCC;tr|Q4D4A0|Q4D4A0_TRYCC	14;13	14;13	14;13	>tr|Q4DXL5|Q4DXL5_TRYCC Malate dehydrogenase OS=Trypanosoma cruzi (strain CL Brener) GN=Tc00.1047053506195.110 PE=3 SV=1;>tr|Q4D4A0|Q4D4A0_TRYCC Malate dehydrogenase (Fragment) OS=Trypanosoma cruzi (strain CL Brener) GN=Tc00.1047053507883.109 PE=3 SV=1	2	14	14	14	42	9	8	12	13	9	8	12	13	9	8	12	13	46.9	46.9	46.9	33351	318	318;301	1	142	0	107.19	By MS/MS	By MS/MS	By MS/MS	By MS/MS	By MS/MS	By MS/MS	29.6	28.6	29.6	23.6	44.3	46.9	51258000000	8732200000	11072000000	7794000000	14776000000
tr|Q4D6N0|Q4D6N0_TRYCC;tr|Q4E389|Q4E389_TRYCC	tr|Q4D6N0|Q4D6N0_TRYCC	14;1	14;1	14;1	>tr|Q4D6N0|Q4D6N0_TRYCC T-complex protein 1, beta subunit, putative OS=Trypanosoma cruzi (strain CL Brener) GN=Tc00.1047053508357.90 PE=3 SV=1	2	14	14	14	42	7	9	13	13	7	9	13	13	7	9	13	13	34.6	34.6	34.6	58.09	529	529;56	1	161	0	249.34	By MS/MS	By MS/MS	By MS/MS	By MS/MS	By MS/MS	By MS/MS	18.3	22.5	20.6	25.3	32.9	32.7	25344000000	3287200000	5720500000	4697400000	6966500000
tr|Q4DU82|Q4DU82_TRYCC;tr|Q4CLV1|Q4CLV1_TRYCC	tr|Q4DU82|Q4DU82_TRYCC	13;1	13;1	3;1	>tr|Q4DU82|Q4DU82_TRYCC Transketolase OS=Trypanosoma cruzi (strain CL Brener) GN=Tc00.1047053511903.120 PE=3 SV=1	2	13	13	3	42	9	10	11	12	9	10	11	12	2	2	2	2	26.2	26.2	4.2	72798	672	672;120	1	191	0	108.85	By MS/MS	By MS/MS	By MS/MS	By MS/MS	By MS/MS	By MS/MS	17.1	20.2	15	14	23.2	25.1	18230000000	2929300000	3822700000	2969800000	5107700000
tr|Q4DUS2|Q4DUS2_TRYCC	tr|Q4DUS2|Q4DUS2_TRYCC	13	13	10	>tr|Q4DUS2|Q4DUS2_TRYCC Uncharacterized protein OS=Trypanosoma cruzi (strain CL Brener) GN=Tc00.1047053507951.160 PE=4 SV=1	1	13	13	10	42	8	11	11	12	8	11	11	12	7	9	8	9	33.1	33.1	23.3	53831	486	486	1	146	0	100.95	By MS/MS	By MS/MS	By MS/MS	By MS/MS	By MS/MS	By MS/MS	20.8	25.7	21	23.7	28.2	32.9	8888100000	1372900000	2058000000	1135600000	2054500000
tr|Q4D1S8|Q4D1S8_TRYCC;tr|Q4DLH7|Q4DLH7_TRYCC;tr|Q4DDQ4|Q4DDQ4_TRYCC	tr|Q4D1S8|Q4D1S8_TRYCC	13;1;1	13;1;1	8;1;1	>tr|Q4D1S8|Q4D1S8_TRYCC Uncharacterized protein OS=Trypanosoma cruzi (strain CL Brener) GN=Tc00.1047053503829.80 PE=4 SV=1	3	13	13	8	42	11	11	10	10	11	11	10	10	7	8	7	6	30.6	30.6	18.6	50501	458	458;1055;1055	1	131	0	323.31	By MS/MS	By MS/MS	By MS/MS	By MS/MS	By MS/MS	By MS/MS	24.5	24.9	21.8	24.9	23.4	25.5	5577000000	1167500000	1170500000	662510000	1246300000
tr|Q4D4Y0|Q4D4Y0_TRYCC	tr|Q4D4Y0|Q4D4Y0_TRYCC	12	12	5	>tr|Q4D4Y0|Q4D4Y0_TRYCC Cytosolic leucyl aminopeptidase, putative OS=Trypanosoma cruzi (strain CL Brener) GN=Tc00.1047053509859.40 PE=4 SV=1	1	12	12	5	42	9	10	12	11	9	10	12	11	4	5	5	4	35.6	35.6	18.8	62273	584	584	1	129	0	69007	By MS/MS	By MS/MS	By MS/MS	By MS/MS	By MS/MS	By MS/MS	27.6	31.2	27.6	27.4	35.6	28.4	4996000000	832130000	1030600000	855120000	1382000000
tr|Q4CNC1|Q4CNC1_TRYCC;tr|Q4CWW7|Q4CWW7_TRYCC	tr|Q4CNC1|Q4CNC1_TRYCC;tr|Q4CWW7|Q4CWW7_TRYCC	12;7	12;7	12;7	>tr|Q4CNC1|Q4CNC1_TRYCC Aspartyl-tRNA synthetase, putative OS=Trypanosoma cruzi (strain CL Brener) GN=Tc00.1047053510777.20 PE=3 SV=1;>tr|Q4CWW7|Q4CWW7_TRYCC Aspartyl-tRNA synthetase, putative (Fragment) OS=Trypanosoma cruzi (strain CL Brener) GN=Tc00.1047	2	12	12	12	42	10	9	11	12	10	9	11	12	10	9	11	12	24.3	24.3	24.3	63542	564	564;261	1	101	0	147.58	By MS/MS	By MS/MS	By MS/MS	By MS/MS	By MS/MS	By MS/MS	22.5	19.1	16.7	16.7	22.5	24.3	4243700000	752680000	679190000	650150000	1305000000
tr|Q4DSJ2|Q4DSJ2_TRYCC;tr|Q4E3S6|Q4E3S6_TRYCC	tr|Q4DSJ2|Q4DSJ2_TRYCC;tr|Q4E3S6|Q4E3S6_TRYCC	13;12	13;12	13;12	>tr|Q4DSJ2|Q4DSJ2_TRYCC Calcium-transporting ATPase OS=Trypanosoma cruzi (strain CL Brener) GN=Tc00.1047053508543.90 PE=3 SV=1;>tr|Q4E3S6|Q4E3S6_TRYCC Calcium-transporting ATPase OS=Trypanosoma cruzi (strain CL Brener) GN=Tc00.1047053506401.170 PE=3 SV=1	2	13	13	13	42	8	11	11	12	8	11	11	12	8	11	11	12	15.3	15.3	15.3	122.11	1103	1103;1101	1	111	0	63.06	By MS/MS	By MS/MS	By MS/MS	By MS/MS	By MS/MS	By MS/MS	9.7	13.1	12.8	9.5	13.5	14.4	4135700000	619720000	873210000	635850000	1173200000
tr|Q4CSV9|Q4CSV9_TRYCC;tr|Q4DBC3|Q4DBC3_TRYCC	tr|Q4CSV9|Q4CSV9_TRYCC;tr|Q4DBC3|Q4DBC3_TRYCC	15;8	15;8	11;8	>tr|Q4CSV9|Q4CSV9_TRYCC Glutamine dependent carbamoyl-phosphate synthase, putative (Fragment) OS=Trypanosoma cruzi (strain CL Brener) GN=Tc00.1047053508373.10 PE=4 SV=1;>tr|Q4DBC3|Q4DBC3_TRYCC Glutamine-dependent carbamoyl-phosphate synthetase, putative (F	2	15	15	11	42	7	8	14	13	7	8	14	13	6	7	10	9	17	17	12.8	141.89	1253	1253;641	1	119	0	126.78	By MS/MS	By MS/MS	By MS/MS	By MS/MS	By MS/MS	By MS/MS	7.2	8.2	4.9	7.1	16	14.4	4917300000	640880000	763370000	972410000	1828100000
tr|Q4E342|Q4E342_TRYCC	tr|Q4E342|Q4E342_TRYCC	14	14	8	>tr|Q4E342|Q4E342_TRYCC Proteasome regulatory non-ATPase subunit 6, putative OS=Trypanosoma cruzi (strain CL Brener) GN=Tc00.1047053508741.300 PE=4 SV=1	1	14	14	8	42	8	10	12	12	8	10	12	12	4	6	7	7	41.4	41.4	26.8	59197	526	526	1	96	0	53332	By MS/MS	By MS/MS	By MS/MS	By MS/MS	By MS/MS	By MS/MS	21.1	27.9	12.9	11	37.6	35.6	2697000000	271390000	358340000	698590000	1137000000
tr|Q4DAD2|Q4DAD2_TRYCC;tr|Q4DKS0|Q4DKS0_TRYCC;tr|Q4CN60|Q4CN60_TRYCC	tr|Q4DAD2|Q4DAD2_TRYCC	15;2;1	15;2;1	15;2;1	>tr|Q4DAD2|Q4DAD2_TRYCC Uncharacterized protein OS=Trypanosoma cruzi (strain CL Brener) GN=Tc00.1047053508989.90 PE=4 SV=1	3	15	15	15	42	8	9	15	10	8	9	15	10	8	9	15	10	27.5	27.5	27.5	84508	738	738;232;131	1	108	0	73101	By MS/MS	By MS/MS	By MS/MS	By MS/MS	By MS/MS	By MS/MS	16	15.9	13.1	12.3	27.5	19.4	3205000000	368170000	576570000	811470000	1051300000
tr|Q4DLD9|Q4DLD9_TRYCC	tr|Q4DLD9|Q4DLD9_TRYCC	12	2	2	>tr|Q4DLD9|Q4DLD9_TRYCC Uncharacterized protein (Fragment) OS=Trypanosoma cruzi (strain CL Brener) GN=Tc00.1047053511311.80 PE=4 SV=1	1	12	2	2	42	9	10	12	11	1	2	2	2	1	2	2	2	25.2	3.3	3.3	79127	706	706	1	17	0	11988	By MS/MS	By MS/MS	By MS/MS	By MS/MS	By MS/MS	By MS/MS	19.5	21	18.1	18.1	25.2	23.9	1029000000	153590000	186890000	177150000	363270000
tr|Q4CQW5|Q4CQW5_TRYCC	tr|Q4CQW5|Q4CQW5_TRYCC	12	1	1	>tr|Q4CQW5|Q4CQW5_TRYCC Fumarate hydratase, putative OS=Trypanosoma cruzi (strain CL Brener) GN=Tc00.1047053509879.40 PE=4 SV=1	1	12	1	1	42	10	10	11	11	1	0	1	1	1	0	1	1	30.8	2.9	2.9	60.85	555	555	1	13	0.0011095	22469	By matching	By matching	By MS/MS	By MS/MS	By matching	By matching	25.4	25	25.4	27.9	27.7	27.7	329580000	32711000	0	33174000	70276000
tr|Q4E4L9|Q4E4L9_TRYCC	tr|Q4E4L9|Q4E4L9_TRYCC	11	11	10	>tr|Q4E4L9|Q4E4L9_TRYCC Peptidyl-prolyl cis-trans isomerase OS=Trypanosoma cruzi (strain CL Brener) GN=Tc00.1047053506925.300 PE=3 SV=1	1	11	11	10	41	10	10	10	11	10	10	10	11	9	9	9	10	83.6	83.6	79.7	18781	177	177	1	388	0	123.72	By MS/MS	By MS/MS	By MS/MS	By MS/MS	By MS/MS	By MS/MS	64.4	64.4	52.5	64.4	83.6	83.6	63456000000	10631000000	11534000000	10205000000	16723000000
tr|Q4DIZ9|Q4DIZ9_TRYCC	tr|Q4DIZ9|Q4DIZ9_TRYCC	14	14	14	>tr|Q4DIZ9|Q4DIZ9_TRYCC 40S ribosomal protein S2, putative OS=Trypanosoma cruzi (strain CL Brener) GN=Tc00.1047053503833.40 PE=3 SV=1	1	14	14	14	41	7	7	14	13	7	7	14	13	7	7	14	13	49.4	49.4	49.4	28532	263	263	1	138	0	168.73	By MS/MS	By MS/MS	By MS/MS	By MS/MS	By MS/MS	By MS/MS	25.5	25.5	17.1	16.7	49.4	42.2	23767000000	3267300000	4317000000	4560600000	7433800000
tr|Q4DJX1|Q4DJX1_TRYCC;tr|Q4D6P8|Q4D6P8_TRYCC	tr|Q4DJX1|Q4DJX1_TRYCC	12;4	12;4	12;4	>tr|Q4DJX1|Q4DJX1_TRYCC Ribosomal protein L3, putative OS=Trypanosoma cruzi (strain CL Brener) GN=Tc00.1047053510879.110 PE=3 SV=1	2	12	12	12	41	8	10	11	12	8	10	11	12	8	10	11	12	27.3	27.3	27.3	48539	428	428;221	1	232	0	319.77	By MS/MS	By MS/MS	By MS/MS	By MS/MS	By MS/MS	By MS/MS	19.6	23.8	23.6	21.5	25.5	27.3	18186000000	2169700000	2458900000	3631000000	8031300000
sp|Q4E162|IF4A_TRYCC;tr|Q4E0F6|Q4E0F6_TRYCC	sp|Q4E162|IF4A_TRYCC;tr|Q4E0F6|Q4E0F6_TRYCC	14;14	14;14	14;14	>sp|Q4E162|IF4A_TRYCC Probable eukaryotic initiation factor 4A OS=Trypanosoma cruzi (strain CL Brener) GN=Tc00.1047053511585.190 PE=3 SV=1;>tr|Q4E0F6|Q4E0F6_TRYCC Eukaryotic initiation factor 4a, putative OS=Trypanosoma cruzi (strain CL Brener) GN=Tc00.104	2	14	14	14	41	8	9	12	12	8	9	12	12	8	9	12	12	43.3	43.3	43.3	45503	404	404;438	1	176	0	84394	By MS/MS	By MS/MS	By MS/MS	By MS/MS	By MS/MS	By MS/MS	29.7	32.7	22	28	39.1	34.9	13194000000	1674100000	2733700000	2934100000	4629200000
tr|Q4CUD7|Q4CUD7_TRYCC;tr|Q4CMZ5|Q4CMZ5_TRYCC	tr|Q4CUD7|Q4CUD7_TRYCC;tr|Q4CMZ5|Q4CMZ5_TRYCC	11;10	11;10	11;10	>tr|Q4CUD7|Q4CUD7_TRYCC Transaldolase OS=Trypanosoma cruzi (strain CL Brener) GN=Tc00.1047053503477.20 PE=3 SV=1;>tr|Q4CMZ5|Q4CMZ5_TRYCC Transaldolase OS=Trypanosoma cruzi (strain CL Brener) GN=Tc00.1047053507889.10 PE=3 SV=1	2	11	11	11	41	10	11	10	10	10	11	10	10	10	11	10	10	39.9	39.9	39.9	36446	331	331;331	1	137	0	70704	By MS/MS	By MS/MS	By MS/MS	By MS/MS	By MS/MS	By MS/MS	36.6	39.9	37.5	36.9	36.6	36.6	8034000000	1268000000	1647800000	1020100000	2408600000
tr|Q4DL69|Q4DL69_TRYCC;tr|Q4DDN0|Q4DDN0_TRYCC	tr|Q4DL69|Q4DL69_TRYCC;tr|Q4DDN0|Q4DDN0_TRYCC	12;6	12;6	12;6	>tr|Q4DL69|Q4DL69_TRYCC Uncharacterized protein OS=Trypanosoma cruzi (strain CL Brener) GN=Tc00.1047053508919.140 PE=4 SV=1;>tr|Q4DDN0|Q4DDN0_TRYCC Uncharacterized protein (Fragment) OS=Trypanosoma cruzi (strain CL Brener) GN=Tc00.1047053507975.80 PE=4 SV=	2	12	12	12	41	9	9	11	12	9	9	11	12	9	9	11	12	19.4	19.4	19.4	87299	762	762;526	1	143	0	159.14	By MS/MS	By MS/MS	By MS/MS	By MS/MS	By MS/MS	By MS/MS	11.8	11.8	11.7	11.7	17.8	19.4	9564400000	1390300000	2149000000	1528700000	2688300000
tr|Q4DZM5|Q4DZM5_TRYCC	tr|Q4DZM5|Q4DZM5_TRYCC	14	14	14	>tr|Q4DZM5|Q4DZM5_TRYCC Proteasome regulatory ATPase subunit, putative OS=Trypanosoma cruzi (strain CL Brener) GN=Tc00.1047053504147.200 PE=3 SV=1	1	14	14	14	41	9	9	11	12	9	9	11	12	9	9	11	12	40.6	40.6	40.6	45442	404	404	1	128	0	109.12	By MS/MS	By MS/MS	By MS/MS	By MS/MS	By MS/MS	By MS/MS	25	26.5	19.8	21.5	33.4	37.1	5309700000	619940000	1045400000	1309200000	1737900000
tr|Q4DGS4|Q4DGS4_TRYCC	tr|Q4DGS4|Q4DGS4_TRYCC	13	13	3	>tr|Q4DGS4|Q4DGS4_TRYCC Ubiquitin-like protein, putative OS=Trypanosoma cruzi (strain CL Brener) GN=Tc00.1047053506737.70 PE=4 SV=1	1	13	13	3	41	10	8	12	11	10	8	12	11	3	3	3	3	33.3	33.3	10.6	68859	622	622	1	173	0	175.62	By MS/MS	By MS/MS	By MS/MS	By MS/MS	By MS/MS	By MS/MS	24.9	22	24.9	24.9	33.3	26.5	5298700000	846760000	744250000	1203500000	1371200000
tr|Q4DUR3|Q4DUR3_TRYCC	tr|Q4DUR3|Q4DUR3_TRYCC	14	14	10	>tr|Q4DUR3|Q4DUR3_TRYCC Uncharacterized protein (Fragment) OS=Trypanosoma cruzi (strain CL Brener) GN=Tc00.1047053507951.299 PE=4 SV=1	1	14	14	10	41	9	9	11	12	9	9	11	12	5	7	8	9	25.1	25.1	18.5	82882	717	717	1	119	0	19934	By MS/MS	By MS/MS	By MS/MS	By MS/MS	By MS/MS	By MS/MS	15.1	15.3	10.5	13.4	19.4	21.9	6581500000	1144400000	1540500000	1097200000	1941200000
tr|Q4DFX2|Q4DFX2_TRYCC	tr|Q4DFX2|Q4DFX2_TRYCC	12	3	3	>tr|Q4DFX2|Q4DFX2_TRYCC Uncharacterized protein OS=Trypanosoma cruzi (strain CL Brener) GN=Tc00.1047053506367.30 PE=4 SV=1	1	12	3	3	41	10	8	12	11	2	1	3	3	2	1	3	3	34.4	12.7	12.7	37619	331	331	1	35	0	14378	By MS/MS	By MS/MS	By MS/MS	By MS/MS	By MS/MS	By MS/MS	29.3	25.4	25.4	25.4	34.4	34.4	1801600000	350930000	419080000	314240000	312360000
tr|Q4DDX0|Q4DDX0_TRYCC	tr|Q4DDX0|Q4DDX0_TRYCC	13	13	5	>tr|Q4DDX0|Q4DDX0_TRYCC Uncharacterized protein OS=Trypanosoma cruzi (strain CL Brener) GN=Tc00.1047053509011.60 PE=4 SV=1	1	13	13	5	41	10	7	13	11	10	7	13	11	4	3	5	4	34.8	34.8	13.6	65523	575	575	1	132	0	73725	By MS/MS	By MS/MS	By MS/MS	By MS/MS	By MS/MS	By MS/MS	26.4	19	26.4	26.4	34.8	32.3	4675400000	519590000	407800000	1248100000	1753800000
tr|Q4DAT6|Q4DAT6_TRYCC	tr|Q4DAT6|Q4DAT6_TRYCC	12	3	3	>tr|Q4DAT6|Q4DAT6_TRYCC Hsc70-interacting protein (Hip), putative OS=Trypanosoma cruzi (strain CL Brener) GN=Tc00.1047053510143.24 PE=4 SV=1	1	12	3	3	41	10	10	11	10	3	3	3	3	3	3	3	3	35.5	10	10	48092	462	462	1	29	0	64622	By MS/MS	By MS/MS	By MS/MS	By MS/MS	By MS/MS	By MS/MS	29	29	24.2	29	30.5	31	1123700000	176400000	276640000	110740000	401780000
tr|Q4CP43|Q4CP43_TRYCC	tr|Q4CP43|Q4CP43_TRYCC	13	13	13	>tr|Q4CP43|Q4CP43_TRYCC Uncharacterized protein (Fragment) OS=Trypanosoma cruzi (strain CL Brener) GN=Tc00.1047053509761.10 PE=4 SV=1	1	13	13	13	41	7	10	11	13	7	10	11	13	7	10	11	13	15.4	15.4	15.4	100.79	903	903	1	99	0	18166	By MS/MS	By MS/MS	By MS/MS	By MS/MS	By MS/MS	By MS/MS	7.1	10.7	5.8	9.4	13.4	15.4	3493800000	565750000	678470000	560550000	1104600000
tr|Q4DD65|Q4DD65_TRYCC;tr|Q4CV70|Q4CV70_TRYCC	tr|Q4DD65|Q4DD65_TRYCC	14;2	14;2	6;2	>tr|Q4DD65|Q4DD65_TRYCC Uncharacterized protein OS=Trypanosoma cruzi (strain CL Brener) GN=Tc00.1047053503975.100 PE=4 SV=1	2	14	14	6	41	11	8	12	10	11	8	12	10	5	3	4	4	10.1	10.1	3.9	201.05	1925	1925;207	1	127	0	157.08	By MS/MS	By MS/MS	By MS/MS	By MS/MS	By MS/MS	By MS/MS	7.2	5.6	6.1	6.6	9.5	8	4263600000	853430000	768800000	430180000	747210000
tr|Q4E5Q6|Q4E5Q6_TRYCC	tr|Q4E5Q6|Q4E5Q6_TRYCC	15	15	3	>tr|Q4E5Q6|Q4E5Q6_TRYCC Uncharacterized protein OS=Trypanosoma cruzi (strain CL Brener) GN=Tc00.1047053506529.250 PE=4 SV=1	1	15	15	3	41	8	11	12	10	8	11	12	10	3	3	3	3	12.6	12.6	2.7	161.5	1424	1424	1	115	0	38369	By MS/MS	By MS/MS	By MS/MS	By MS/MS	By MS/MS	By MS/MS	7.2	9.1	7.8	9	10.3	8.6	3453800000	452980000	767720000	600750000	879220000
tr|Q4CQU6|Q4CQU6_TRYCC	tr|Q4CQU6|Q4CQU6_TRYCC	12	3	2	>tr|Q4CQU6|Q4CQU6_TRYCC NADH-dependent fumarate reductase, putative (Fragment) OS=Trypanosoma cruzi (strain CL Brener) GN=Tc00.1047053503467.9 PE=4 SV=1	1	12	3	2	41	9	9	12	11	2	2	3	3	2	2	2	2	24	5.6	3.1	64233	588	588	1	33	0	25964	By MS/MS	By MS/MS	By MS/MS	By MS/MS	By MS/MS	By MS/MS	17.5	17.5	17.5	17.5	24	22.1	1260200000	167670000	293340000	174890000	276730000
tr|Q4DQP3|Q4DQP3_TRYCC;tr|Q4CW60|Q4CW60_TRYCC	tr|Q4DQP3|Q4DQP3_TRYCC	13;6	13;6	13;6	>tr|Q4DQP3|Q4DQP3_TRYCC Coatomer subunit beta OS=Trypanosoma cruzi (strain CL Brener) GN=Tc00.1047053506563.30 PE=4 SV=1	2	13	13	13	41	9	8	12	12	9	8	12	12	9	8	12	12	18.2	18.2	18.2	107.83	980	980;260	1	92	0	28655	By MS/MS	By MS/MS	By MS/MS	By MS/MS	By MS/MS	By MS/MS	11.6	10.6	7.2	7.3	18.2	17	2314300000	306860000	259380000	460830000	784100000
tr|Q4D5Y5|Q4D5Y5_TRYCC	tr|Q4D5Y5|Q4D5Y5_TRYCC	13	2	2	>tr|Q4D5Y5|Q4D5Y5_TRYCC Arginase, putative OS=Trypanosoma cruzi (strain CL Brener) GN=Tc00.1047053507963.20 PE=3 SV=1	1	13	2	2	41	11	11	9	10	0	1	0	0	0	1	0	0	56.2	14.3	14.3	33588	308	308	1	6	0.0034305	17948	By matching	By matching	By MS/MS	By MS/MS	By matching	By matching	41.9	41.6	49.7	49.7	32.8	35.4	118560000	0	7714200	0	0
tr|Q4E2Y7|Q4E2Y7_TRYCC	tr|Q4E2Y7|Q4E2Y7_TRYCC	12	1	1	>tr|Q4E2Y7|Q4E2Y7_TRYCC Lanosterol synthase, putative OS=Trypanosoma cruzi (strain CL Brener) GN=Tc00.1047053508175.70 PE=3 SV=1	1	12	1	1	41	10	10	10	11	1	1	1	1	1	1	1	1	16.6	1.1	1.1	102.53	902	902	1	8	1	-2	By MS/MS	By MS/MS	By MS/MS	By MS/MS	By matching	By matching	12.7	14.1	8.3	9.4	14.1	15.2	48594000	0	19726000	5210900	9225400
tr|Q4DFA9|Q4DFA9_TRYCC	tr|Q4DFA9|Q4DFA9_TRYCC	11	11	3	>tr|Q4DFA9|Q4DFA9_TRYCC Uncharacterized protein OS=Trypanosoma cruzi (strain CL Brener) GN=Tc00.1047053508209.110 PE=4 SV=1	1	11	11	3	40	9	10	11	10	9	10	11	10	2	2	3	3	44	44	10.1	40007	357	357	1	123	0	174.95	By MS/MS	By MS/MS	By MS/MS	By MS/MS	By MS/MS	By MS/MS	34.5	39.8	34.5	34.5	44	38.7	7463300000	1278200000	1753200000	1061200000	1830000000
tr|Q4D9Z4|Q4D9Z4_TRYCC	tr|Q4D9Z4|Q4D9Z4_TRYCC	14	14	4	>tr|Q4D9Z4|Q4D9Z4_TRYCC Pyruvate kinase OS=Trypanosoma cruzi (strain CL Brener) GN=Tc00.1047053511281.60 PE=1 SV=1	1	14	14	4	40	8	9	11	12	8	9	11	12	1	1	3	2	41.3	41.3	13.2	54605	499	499	1	135	0	60815	By MS/MS	By MS/MS	By MS/MS	By MS/MS	By MS/MS	By MS/MS	17.2	22.2	23.4	24.4	31.3	32.5	8656000000	1577200000	1809100000	1142500000	2481200000
tr|Q4DW59|Q4DW59_TRYCC;tr|Q4DW58|Q4DW58_TRYCC	tr|Q4DW59|Q4DW59_TRYCC	11;2	11;2	2;1	>tr|Q4DW59|Q4DW59_TRYCC Uncharacterized protein OS=Trypanosoma cruzi (strain CL Brener) GN=Tc00.1047053508231.170 PE=4 SV=1	2	11	11	2	40	10	11	9	10	10	11	9	10	2	2	2	2	25.3	25.3	5.9	59879	529	529;347	1	152	0	161	By MS/MS	By MS/MS	By MS/MS	By MS/MS	By MS/MS	By MS/MS	22.9	25.3	21.7	21.7	22.9	22.9	6781500000	1201000000	1613700000	802170000	1586800000
tr|Q4DHU8|Q4DHU8_TRYCC	tr|Q4DHU8|Q4DHU8_TRYCC	12	12	3	>tr|Q4DHU8|Q4DHU8_TRYCC Galactokinase, putative OS=Trypanosoma cruzi (strain CL Brener) GN=Tc00.1047053508465.90 PE=4 SV=1	1	12	12	3	40	8	10	11	11	8	10	11	11	2	3	2	3	32.1	32.1	9.4	51732	468	468	1	120	0	92.86	By MS/MS	By MS/MS	By MS/MS	By MS/MS	By MS/MS	By MS/MS	20.1	26.9	20.1	20.1	29.9	31.2	4712400000	874160000	1357800000	756040000	873440000
tr|Q4CLW3|Q4CLW3_TRYCC;tr|Q4CWB6|Q4CWB6_TRYCC	tr|Q4CLW3|Q4CLW3_TRYCC;tr|Q4CWB6|Q4CWB6_TRYCC	12;7	12;7	12;7	>tr|Q4CLW3|Q4CLW3_TRYCC Trifunctional enzyme alpha subunit, mitochondrial-like protein, putative (Fragment) OS=Trypanosoma cruzi (strain CL Brener) GN=Tc00.1047053509701.10 PE=4 SV=1;>tr|Q4CWB6|Q4CWB6_TRYCC Trifunctional enzyme alpha subunit, mitochondrial	2	12	12	12	40	9	10	10	11	9	10	10	11	9	10	10	11	19.4	19.4	19.4	75686	687	687;691	1	116	0	36959	By MS/MS	By MS/MS	By MS/MS	By MS/MS	By MS/MS	By MS/MS	17	16.2	14	17	18	19.2	5725800000	1224700000	1567500000	650250000	1274600000
tr|Q4DYK2|Q4DYK2_TRYCC	tr|Q4DYK2|Q4DYK2_TRYCC	10	2	2	>tr|Q4DYK2|Q4DYK2_TRYCC ADP,ATP carrier protein 1, mitochondrial, putative OS=Trypanosoma cruzi (strain CL Brener) GN=Tc00.1047053506211.160 PE=3 SV=1	1	10	2	2	40	10	10	10	10	2	2	2	2	2	2	2	2	36.6	11.8	11.8	34955	314	314	1	41	0	81981	By MS/MS	By MS/MS	By MS/MS	By MS/MS	By MS/MS	By MS/MS	36.6	36.6	36.6	31.2	36.6	36.6	5371800000	332570000	776840000	1405100000	2568900000
tr|Q4E1D4|Q4E1D4_TRYCC	tr|Q4E1D4|Q4E1D4_TRYCC	12	12	9	>tr|Q4E1D4|Q4E1D4_TRYCC GMP synthase, putative OS=Trypanosoma cruzi (strain CL Brener) GN=Tc00.1047053511807.110 PE=4 SV=1	1	12	12	9	40	9	9	11	11	9	9	11	11	6	6	8	8	21.9	21.9	17.7	72295	657	657	1	118	0	21164	By MS/MS	By MS/MS	By MS/MS	By MS/MS	By MS/MS	By MS/MS	15.8	15.8	13.4	13.4	20.4	19.2	5410500000	885060000	1036300000	822130000	1646900000
tr|Q4DF18|Q4DF18_TRYCC	tr|Q4DF18|Q4DF18_TRYCC	12	3	3	>tr|Q4DF18|Q4DF18_TRYCC Galactokinase-like protein, putative OS=Trypanosoma cruzi (strain CL Brener) GN=Tc00.1047053507001.110 PE=4 SV=1	1	12	3	3	40	8	10	11	11	2	3	2	3	2	3	2	3	32.1	9.4	9.4	51903	468	468	1	47	0	33655	By MS/MS	By MS/MS	By MS/MS	By MS/MS	By matching	By MS/MS	20.1	26.9	22.2	22.2	29.9	31.2	2011000000	444310000	646990000	84743000	263130000
tr|Q4D7V3|Q4D7V3_TRYCC	tr|Q4D7V3|Q4D7V3_TRYCC	15	15	15	>tr|Q4D7V3|Q4D7V3_TRYCC Lysine--tRNA ligase OS=Trypanosoma cruzi (strain CL Brener) GN=Tc00.1047053508971.30 PE=3 SV=1	1	15	15	15	40	8	7	13	12	8	7	13	12	8	7	13	12	38.1	38.1	38.1	65922	580	580	1	105	0	58995	By MS/MS	By MS/MS	By MS/MS	By MS/MS	By MS/MS	By MS/MS	21.6	15.7	14.1	16.2	35.9	29.3	4358500000	475880000	689740000	1090700000	1691000000
tr|Q4DQJ3|Q4DQJ3_TRYCC	tr|Q4DQJ3|Q4DQJ3_TRYCC	12	12	2	>tr|Q4DQJ3|Q4DQJ3_TRYCC Eukaryotic translation initiation factor 3 subunit 8, putative OS=Trypanosoma cruzi (strain CL Brener) GN=Tc00.1047053507723.130 PE=4 SV=1	1	12	12	2	40	8	10	11	11	8	10	11	11	1	1	2	2	18.7	18.7	3.2	82205	716	716	1	110	0	34179	By MS/MS	By MS/MS	By MS/MS	By MS/MS	By MS/MS	By MS/MS	13.1	15.9	10.5	12.8	17.9	17.5	4618900000	802270000	965940000	854160000	1194200000
tr|Q4DII7|Q4DII7_TRYCC	tr|Q4DII7|Q4DII7_TRYCC	12	12	4	>tr|Q4DII7|Q4DII7_TRYCC Uncharacterized protein OS=Trypanosoma cruzi (strain CL Brener) GN=Tc00.1047053509799.140 PE=4 SV=1	1	12	12	4	40	8	10	11	11	8	10	11	11	3	4	4	4	20.6	20.6	6.6	65517	588	588	1	104	0	70652	By MS/MS	By MS/MS	By MS/MS	By MS/MS	By MS/MS	By MS/MS	12.2	16.5	9	13.3	18.2	18.9	3520000000	504220000	701260000	583670000	976580000
tr|Q4DU57|Q4DU57_TRYCC	tr|Q4DU57|Q4DU57_TRYCC	12	12	12	>tr|Q4DU57|Q4DU57_TRYCC Golgi/lysosome glycoprotein, putative OS=Trypanosoma cruzi (strain CL Brener) GN=Tc00.1047053511391.180 PE=4 SV=1	1	12	12	12	40	9	9	12	10	9	9	12	10	9	9	12	10	30.6	30.6	30.6	68195	615	615	1	118	0	62755	By MS/MS	By MS/MS	By MS/MS	By MS/MS	By MS/MS	By MS/MS	25.7	21.5	26.2	28.8	30.6	27	3815900000	554230000	406690000	815660000	1139800000
tr|Q4DW87|Q4DW87_TRYCC	tr|Q4DW87|Q4DW87_TRYCC	13	13	1	>tr|Q4DW87|Q4DW87_TRYCC U-box domain protein, putative OS=Trypanosoma cruzi (strain CL Brener) GN=Tc00.1047053506989.210 PE=4 SV=1	1	13	13	1	40	8	9	12	11	8	9	12	11	0	0	1	1	32.2	32.2	3	67837	605	605	1	105	0	97405	By MS/MS	By MS/MS	By MS/MS	By MS/MS	By MS/MS	By MS/MS	18.3	18.3	11.2	13.2	30.6	24.5	3224700000	401810000	569820000	632220000	1290500000
tr|Q4DSQ9|Q4DSQ9_TRYCC;tr|Q4DA87|Q4DA87_TRYCC	tr|Q4DSQ9|Q4DSQ9_TRYCC	14;6	14;6	14;6	>tr|Q4DSQ9|Q4DSQ9_TRYCC Uncharacterized protein OS=Trypanosoma cruzi (strain CL Brener) GN=Tc00.1047053509937.50 PE=4 SV=1	2	14	14	14	40	11	7	11	11	11	7	11	11	11	7	11	11	29.1	29.1	29.1	92502	828	828;828	1	126	0	38976	By MS/MS	By MS/MS	By MS/MS	By MS/MS	By MS/MS	By MS/MS	23.2	13.8	16.7	22	22.8	22.8	3535600000	587620000	669870000	488920000	949960000
tr|Q4E397|Q4E397_TRYCC	tr|Q4E397|Q4E397_TRYCC	13	13	13	>tr|Q4E397|Q4E397_TRYCC Arginyl-tRNA synthetase, putative OS=Trypanosoma cruzi (strain CL Brener) GN=Tc00.1047053508355.320 PE=3 SV=1	1	13	13	13	40	9	7	11	13	9	7	11	13	9	7	11	13	21.1	21.1	21.1	78834	692	692	1	79	0	15825	By MS/MS	By MS/MS	By MS/MS	By MS/MS	By MS/MS	By MS/MS	14.6	9.8	7.9	4.2	19.5	21.1	2373500000	264090000	382990000	562470000	995260000
tr|Q4DLU4|Q4DLU4_TRYCC	tr|Q4DLU4|Q4DLU4_TRYCC	11	11	6	>tr|Q4DLU4|Q4DLU4_TRYCC Uncharacterized protein OS=Trypanosoma cruzi (strain CL Brener) GN=Tc00.1047053509683.10 PE=4 SV=1	1	11	11	6	40	9	10	10	11	9	10	10	11	4	5	6	6	5.5	5.5	3.2	323.97	2983	2983	1	114	0	72181	By MS/MS	By MS/MS	By MS/MS	By MS/MS	By MS/MS	By MS/MS	4.4	4.7	4.4	3.7	4.9	5.5	3881000000	618950000	833000000	502100000	1214800000
tr|Q4E1U3|Q4E1U3_TRYCC	tr|Q4E1U3|Q4E1U3_TRYCC	13	3	3	>tr|Q4E1U3|Q4E1U3_TRYCC Pyruvate kinase OS=Trypanosoma cruzi (strain CL Brener) GN=Tc00.1047053507993.390 PE=3 SV=1	1	13	3	3	40	8	11	9	12	1	3	1	2	1	3	1	2	37.3	9.2	9.2	54673	499	499	1	15	0	25437	By matching	By MS/MS	By matching	By MS/MS	By MS/MS	By matching	17.2	29.3	17.2	22.2	24.2	35.1	502130000	108660000	126090000	68277000	75691000
tr|Q4D7U8|Q4D7U8_TRYCC	tr|Q4D7U8|Q4D7U8_TRYCC	13	1	1	>tr|Q4D7U8|Q4D7U8_TRYCC U-box domain protein, putative OS=Trypanosoma cruzi (strain CL Brener) GN=Tc00.1047053506591.20 PE=4 SV=1	1	13	1	1	40	8	9	12	11	0	0	1	1	0	0	1	1	34.5	5.3	5.3	67817	605	605	1	3	0.0031261	18689	By matching	By matching	By matching	By matching	By MS/MS	By MS/MS	18.3	18.3	11.2	13.2	32.9	26.8	36935000	0	0	36935000	0
tr|Q4DV43|Q4DV43_TRYCC	tr|Q4DV43|Q4DV43_TRYCC	10	10	10	>tr|Q4DV43|Q4DV43_TRYCC Triosephosphate isomerase OS=Trypanosoma cruzi (strain CL Brener) GN=Tc00.1047053508647.200 PE=3 SV=1	1	10	10	10	39	10	10	10	9	10	10	10	9	10	10	10	9	50.2	50.2	50.2	27305	251	251	1	243	0	155.78	By MS/MS	By MS/MS	By MS/MS	By MS/MS	By MS/MS	By MS/MS	50.2	50.2	50.2	50.2	50.2	44.6	29309000000	5999600000	7174000000	3518300000	5560800000
tr|Q4D6I3|Q4D6I3_TRYCC	tr|Q4D6I3|Q4D6I3_TRYCC	10	10	10	>tr|Q4D6I3|Q4D6I3_TRYCC Uncharacterized protein OS=Trypanosoma cruzi (strain CL Brener) GN=Tc00.1047053508823.70 PE=4 SV=1	1	10	10	10	39	10	10	10	9	10	10	10	9	10	10	10	9	42.3	42.3	42.3	27915	241	241	1	171	0	91009	By MS/MS	By MS/MS	By MS/MS	By MS/MS	By MS/MS	By MS/MS	42.3	42.3	42.3	42.3	42.3	42.3	28230000000	4799300000	6501700000	3445500000	5962400000
tr|Q4DHF0|Q4DHF0_TRYCC;tr|Q4DCN9|Q4DCN9_TRYCC	tr|Q4DHF0|Q4DHF0_TRYCC;tr|Q4DCN9|Q4DCN9_TRYCC	12;12	12;12	12;12	>tr|Q4DHF0|Q4DHF0_TRYCC Glyceraldehyde-3-phosphate dehydrogenase OS=Trypanosoma cruzi (strain CL Brener) GN=Tc00.1047053509065.60 PE=3 SV=1;>tr|Q4DCN9|Q4DCN9_TRYCC Glyceraldehyde-3-phosphate dehydrogenase OS=Trypanosoma cruzi (strain CL Brener) GN=Tc00.104	2	12	12	12	39	7	8	12	12	7	8	12	12	7	8	12	12	34.5	34.5	34.5	39017	359	359;359	1	165	0	191.66	By MS/MS	By MS/MS	By MS/MS	By MS/MS	By MS/MS	By MS/MS	22.8	26.2	24.8	22.8	34.5	34.5	38530000000	5126700000	8793400000	6501300000	10301000000
tr|Q4DU59|Q4DU59_TRYCC	tr|Q4DU59|Q4DU59_TRYCC	11	11	11	>tr|Q4DU59|Q4DU59_TRYCC Cytochrome c1, heme protein, mitochondrial, putative OS=Trypanosoma cruzi (strain CL Brener) GN=Tc00.1047053511391.160 PE=4 SV=1	1	11	11	11	39	10	9	10	10	10	9	10	10	10	9	10	10	49.6	49.6	49.6	30008	258	258	1	159	0	73699	By MS/MS	By MS/MS	By MS/MS	By MS/MS	By MS/MS	By MS/MS	46.9	42.6	49.6	49.6	46.9	49.6	7991500000	772280000	1395100000	1242900000	2047900000
tr|Q4DAG5|Q4DAG5_TRYCC;tr|Q4DZ14|Q4DZ14_TRYCC	tr|Q4DAG5|Q4DAG5_TRYCC;tr|Q4DZ14|Q4DZ14_TRYCC	10;8	10;8	10;8	>tr|Q4DAG5|Q4DAG5_TRYCC Deoxyribose-phosphate aldolase, putative OS=Trypanosoma cruzi (strain CL Brener) GN=Tc00.1047053507559.80 PE=3 SV=1;>tr|Q4DZ14|Q4DZ14_TRYCC Deoxyribose-phosphate aldolase, putative OS=Trypanosoma cruzi (strain CL Brener) GN=Tc00.104	2	10	10	10	39	9	10	10	10	9	10	10	10	9	10	10	10	56.2	56.2	56.2	29351	274	274;274	1	139	0	93511	By MS/MS	By MS/MS	By MS/MS	By MS/MS	By MS/MS	By MS/MS	52.6	56.2	48.9	56.2	56.2	56.2	8196200000	1023900000	1490700000	1564400000	1883800000
tr|Q4DV36|Q4DV36_TRYCC	tr|Q4DV36|Q4DV36_TRYCC	12	12	3	>tr|Q4DV36|Q4DV36_TRYCC Malic enzyme OS=Trypanosoma cruzi (strain CL Brener) GN=Tc00.1047053508647.280 PE=3 SV=1	1	12	12	3	39	9	8	10	12	9	8	10	12	3	3	2	3	27.1	27.1	6	62744	565	565	1	160	0	126.45	By MS/MS	By MS/MS	By MS/MS	By MS/MS	By MS/MS	By MS/MS	19.8	16.6	14.5	16.6	24.1	27.1	12331000000	1877400000	2707500000	2116600000	3806800000
tr|Q4DZJ3|Q4DZJ3_TRYCC	tr|Q4DZJ3|Q4DZJ3_TRYCC	12	12	12	>tr|Q4DZJ3|Q4DZJ3_TRYCC Aminopeptidase, putative OS=Trypanosoma cruzi (strain CL Brener) GN=Tc00.1047053508799.240 PE=4 SV=1	1	12	12	12	39	10	9	9	11	10	9	9	11	10	9	9	11	30.8	30.8	30.8	55891	520	520	1	124	0	243.16	By MS/MS	By MS/MS	By MS/MS	By MS/MS	By MS/MS	By MS/MS	22.3	19.4	16.5	16.5	22.3	30.8	8559700000	1569900000	2581900000	808060000	1463600000
tr|Q4CQU0|Q4CQU0_TRYCC;tr|Q4CUT9|Q4CUT9_TRYCC	tr|Q4CQU0|Q4CQU0_TRYCC;tr|Q4CUT9|Q4CUT9_TRYCC	11;8	3;3	3;3	>tr|Q4CQU0|Q4CQU0_TRYCC 40S ribosomal protein SA OS=Trypanosoma cruzi (strain CL Brener) GN=Tc00.1047053503719.20 PE=3 SV=1;>tr|Q4CUT9|Q4CUT9_TRYCC 40S ribosomal protein SA, putative (Fragment) OS=Trypanosoma cruzi (strain CL Brener) GN=Tc00.1047053503757.	2	11	3	3	39	9	9	10	11	3	3	3	3	3	3	3	3	46.9	15.1	15.1	27876	245	245;138	1	70	0	60067	By MS/MS	By MS/MS	By MS/MS	By MS/MS	By MS/MS	By MS/MS	40.4	40.4	37.6	33.5	44.1	46.9	4432700000	607770000	864150000	948380000	1429000000
tr|Q4CVB2|Q4CVB2_TRYCC	tr|Q4CVB2|Q4CVB2_TRYCC	14	14	14	>tr|Q4CVB2|Q4CVB2_TRYCC Uncharacterized protein OS=Trypanosoma cruzi (strain CL Brener) GN=Tc00.1047053509837.10 PE=4 SV=1	1	14	14	14	39	11	9	10	9	11	9	10	9	11	9	10	9	33.2	33.2	33.2	46761	404	404	1	126	0	75495	By MS/MS	By MS/MS	By MS/MS	By MS/MS	By MS/MS	By MS/MS	30.9	24.5	30.9	28.7	28.7	26.7	7723500000	998300000	1269800000	1282300000	2399800000
tr|Q4DKK5|Q4DKK5_TRYCC;tr|Q4CQY5|Q4CQY5_TRYCC	tr|Q4DKK5|Q4DKK5_TRYCC	13;1	13;1	13;1	>tr|Q4DKK5|Q4DKK5_TRYCC Carnitine/choline acetyltransferase, putative OS=Trypanosoma cruzi (strain CL Brener) GN=Tc00.1047053509999.90 PE=4 SV=1	2	13	13	13	39	7	9	12	11	7	9	12	11	7	9	12	11	28.2	28.2	28.2	66988	610	610;165	1	114	0	88983	By MS/MS	By MS/MS	By MS/MS	By MS/MS	By MS/MS	By MS/MS	14.1	16.2	12.3	9.8	28.2	23.9	6705800000	1011000000	1475200000	1146000000	1897800000
tr|Q4D5M2|Q4D5M2_TRYCC	tr|Q4D5M2|Q4D5M2_TRYCC	13	13	2	>tr|Q4D5M2|Q4D5M2_TRYCC RuvB-like helicase OS=Trypanosoma cruzi (strain CL Brener) GN=Tc00.1047053505989.82 PE=3 SV=1	1	13	13	2	39	9	9	12	9	9	9	12	9	1	1	2	1	43.4	43.4	8.3	50094	459	459	1	123	0	71613	By MS/MS	By MS/MS	By MS/MS	By MS/MS	By MS/MS	By MS/MS	29	29.4	22.2	25.9	42.9	33.8	5156800000	751850000	868660000	1055100000	1646300000
tr|Q4E408|Q4E408_TRYCC;tr|Q4DRN5|Q4DRN5_TRYCC	tr|Q4E408|Q4E408_TRYCC;tr|Q4DRN5|Q4DRN5_TRYCC	15;15	15;15	15;15	>tr|Q4E408|Q4E408_TRYCC Heat shock protein HslVU, ATPase subunit HslU, putative OS=Trypanosoma cruzi (strain CL Brener) GN=Tc00.1047053511127.110 PE=4 SV=1;>tr|Q4DRN5|Q4DRN5_TRYCC Heat shock protein HslVU, ATPase subunit HslU, putative OS=Trypanosoma cruzi	2	15	15	15	39	9	9	11	10	9	9	11	10	9	9	11	10	38.4	38.4	38.4	54643	490	490;490	1	112	0	74181	By MS/MS	By MS/MS	By MS/MS	By MS/MS	By MS/MS	By MS/MS	29.2	25.9	26.5	26.5	25.3	24.9	3742000000	605760000	747720000	658850000	1174700000
tr|Q4D066|Q4D066_TRYCC	tr|Q4D066|Q4D066_TRYCC	11	3	3	>tr|Q4D066|Q4D066_TRYCC Calpain-like cysteine peptidase, putative OS=Trypanosoma cruzi (strain CL Brener) GN=Tc00.1047053508675.29 PE=4 SV=1	1	11	3	3	39	8	9	11	11	1	2	3	3	1	2	3	3	86.8	42.1	42.1	12806	114	114	1	45	0	61619	By MS/MS	By MS/MS	By MS/MS	By MS/MS	By MS/MS	By MS/MS	51.8	57.9	57.9	57.9	86.8	86.8	1595700000	70517000	419200000	319570000	435340000
tr|Q4CRY5|Q4CRY5_TRYCC	tr|Q4CRY5|Q4CRY5_TRYCC	11	2	1	>tr|Q4CRY5|Q4CRY5_TRYCC P-type H+-ATPase, putative (Fragment) OS=Trypanosoma cruzi (strain CL Brener) GN=Tc00.1047053509809.39 PE=4 SV=1	1	11	2	1	39	9	9	11	10	2	2	2	2	1	1	1	1	67.3	15	7.3	28202	260	260	1	26	0	79583	By MS/MS	By MS/MS	By MS/MS	By MS/MS	By MS/MS	By MS/MS	56.5	55.8	46.5	51.9	67.3	60.4	1008500000	153700000	298060000	67265000	358580000
tr|Q4CQ60|Q4CQ60_TRYCC	tr|Q4CQ60|Q4CQ60_TRYCC	12	9	7	>tr|Q4CQ60|Q4CQ60_TRYCC Retrotransposon hot spot (RHS) protein, putative OS=Trypanosoma cruzi (strain CL Brener) GN=Tc00.1047053459199.10 PE=4 SV=1	1	12	9	7	39	9	9	12	9	6	6	9	7	4	4	7	5	15.1	11.9	9.3	108.87	939	939	1	99	0	59491	By MS/MS	By MS/MS	By MS/MS	By MS/MS	By MS/MS	By MS/MS	10.8	10.8	8.7	9.1	15.1	10.9	3289600000	480440000	661890000	576510000	745480000
tr|Q4DH21|Q4DH21_TRYCC;tr|Q4DH22|Q4DH22_TRYCC	tr|Q4DH21|Q4DH21_TRYCC	11;2	2;1	2;1	>tr|Q4DH21|Q4DH21_TRYCC Uncharacterized protein OS=Trypanosoma cruzi (strain CL Brener) GN=Tc00.1047053506251.30 PE=4 SV=1	2	11	2	2	39	10	10	9	10	2	1	2	2	2	1	2	2	25.3	5.9	5.9	59847	529	529;347	1	12	0	27873	By MS/MS	By MS/MS	By MS/MS	By MS/MS	By MS/MS	By MS/MS	22.9	23.6	17.8	17.8	22.9	22.9	244800000	37059000	0	64159000	68142000
tr|Q4DFU1|Q4DFU1_TRYCC	tr|Q4DFU1|Q4DFU1_TRYCC	14	2	2	>tr|Q4DFU1|Q4DFU1_TRYCC Uncharacterized protein OS=Trypanosoma cruzi (strain CL Brener) GN=Tc00.1047053507765.110 PE=4 SV=1	1	14	2	2	39	8	8	11	12	0	0	2	1	0	0	2	1	21.4	4.5	4.5	109.18	969	969	1	4	0	50234	By matching	By matching	By matching	By matching	By MS/MS	By MS/MS	11.8	9.4	10.9	10.9	18.5	17.1	53200000	0	0	53200000	0
tr|Q4CU50|Q4CU50_TRYCC	tr|Q4CU50|Q4CU50_TRYCC	12	1	1	>tr|Q4CU50|Q4CU50_TRYCC D-isomer specific 2-hydroxyacid dehydrogenase-protein, putative OS=Trypanosoma cruzi (strain CL Brener) GN=Tc00.1047053506263.30 PE=4 SV=1	1	12	1	1	39	10	9	11	9	0	0	1	0	0	0	1	0	35.5	6.9	6.9	39.15	346	346	1	1	1	-2	By matching	By matching	By matching	By matching	By MS/MS	By matching	27.5	24.9	23.7	23.7	34.4	27.5	9216500	0	0	9216500	0
tr|Q4CY01|Q4CY01_TRYCC	tr|Q4CY01|Q4CY01_TRYCC	15	3	3	>tr|Q4CY01|Q4CY01_TRYCC Uncharacterized protein (Fragment) OS=Trypanosoma cruzi (strain CL Brener) GN=Tc00.1047053511823.14 PE=4 SV=1	1	15	3	3	39	10	10	10	9	0	0	0	1	0	0	0	1	53.1	3.8	3.8	132.11	1129	1129	1	3	0.0042918	15588	By matching	By matching	By MS/MS	By MS/MS	By matching	By MS/MS	46.4	48.7	47.9	48.3	46.9	50.2	0	0	0	0	0
tr|Q4DSB7|Q4DSB7_TRYCC;tr|Q4CR34|Q4CR34_TRYCC	tr|Q4DSB7|Q4DSB7_TRYCC;tr|Q4CR34|Q4CR34_TRYCC	10;10	10;10	10;10	>tr|Q4DSB7|Q4DSB7_TRYCC Uncharacterized protein OS=Trypanosoma cruzi (strain CL Brener) GN=Tc00.1047053509767.170 PE=4 SV=1;>tr|Q4CR34|Q4CR34_TRYCC Uncharacterized protein OS=Trypanosoma cruzi (strain CL Brener) GN=Tc00.1047053506219.40 PE=4 SV=1	2	10	10	10	38	9	10	10	9	9	10	10	9	9	10	10	9	25.8	25.8	25.8	34077	310	310;310	1	167	0	97072	By MS/MS	By MS/MS	By MS/MS	By MS/MS	By MS/MS	By MS/MS	18.1	25.8	17.7	17.7	25.8	18.1	36756000000	6454700000	8330800000	5667900000	8302700000
tr|Q4DYC3|Q4DYC3_TRYCC	tr|Q4DYC3|Q4DYC3_TRYCC	11	11	11	>tr|Q4DYC3|Q4DYC3_TRYCC NADH-cytochrome b5 reductase OS=Trypanosoma cruzi (strain CL Brener) GN=Tc00.1047053511817.40 PE=3 SV=1	1	11	11	11	38	9	11	9	9	9	11	9	9	9	11	9	9	46.2	46.2	46.2	32096	288	288	1	160	0	47888	By MS/MS	By MS/MS	By MS/MS	By MS/MS	By MS/MS	By MS/MS	39.6	46.2	29.9	35.1	38.9	40.6	11298000000	1903600000	2602600000	1328800000	2870200000
tr|Q4DWS5|Q4DWS5_TRYCC	tr|Q4DWS5|Q4DWS5_TRYCC	13	13	4	>tr|Q4DWS5|Q4DWS5_TRYCC Hsc70-interacting protein, putative OS=Trypanosoma cruzi (strain CL Brener) GN=Tc00.1047053508409.210 PE=4 SV=1	1	13	13	4	38	9	8	11	10	9	8	11	10	2	1	3	3	52.1	52.1	20.9	41608	378	378	1	139	0	191.35	By MS/MS	By MS/MS	By MS/MS	By MS/MS	By MS/MS	By MS/MS	32.8	25.9	32.3	32.8	43.4	43.9	11810000000	2214800000	2556400000	1506300000	2516600000
tr|Q4CQ63|Q4CQ63_TRYCC;tr|Q4CL25|Q4CL25_TRYCC	tr|Q4CQ63|Q4CQ63_TRYCC	11;3	11;3	3;0	>tr|Q4CQ63|Q4CQ63_TRYCC 40S ribosomal protein SA OS=Trypanosoma cruzi (strain CL Brener) GN=Tc00.1047053510425.19 PE=3 SV=1	2	11	11	3	38	9	8	10	11	9	8	10	11	3	2	3	3	46.9	46.9	15.1	27848	245	245;110	1	119	0	150.16	By MS/MS	By MS/MS	By MS/MS	By MS/MS	By MS/MS	By MS/MS	40.4	40.4	37.6	33.5	44.1	46.9	13149000000	1597300000	1996800000	3223600000	4866500000
tr|Q4DFP0|Q4DFP0_TRYCC	tr|Q4DFP0|Q4DFP0_TRYCC	12	12	3	>tr|Q4DFP0|Q4DFP0_TRYCC NADP-dependent alcohol hydrogenase, putative OS=Trypanosoma cruzi (strain CL Brener) GN=Tc00.1047053504425.60 PE=3 SV=1	1	12	12	3	38	8	8	11	11	8	8	11	11	3	3	3	3	47.9	47.9	15.7	37327	351	351	1	129	0	174.37	By MS/MS	By MS/MS	By MS/MS	By MS/MS	By MS/MS	By MS/MS	30.8	35.3	26.2	18.2	45	41.9	12696000000	1853500000	1122200000	2554600000	5243000000
tr|Q4DK76|Q4DK76_TRYCC	tr|Q4DK76|Q4DK76_TRYCC	10	10	3	>tr|Q4DK76|Q4DK76_TRYCC Pyridoxal phosphate homeostasis protein OS=Trypanosoma cruzi (strain CL Brener) GN=Tc00.1047053509601.90 PE=3 SV=1	1	10	10	3	38	9	9	10	10	9	9	10	10	3	3	3	3	45.2	45.2	18.7	27422	252	252	1	128	0	113.32	By MS/MS	By MS/MS	By MS/MS	By MS/MS	By MS/MS	By MS/MS	44.4	45.2	45.2	45.2	45.2	45.2	8132400000	1373700000	1440000000	1544700000	2279000000
tr|Q4DI66|Q4DI66_TRYCC	tr|Q4DI66|Q4DI66_TRYCC	13	13	6	>tr|Q4DI66|Q4DI66_TRYCC Pyruvate dehydrogenase E1 component subunit alpha OS=Trypanosoma cruzi (strain CL Brener) GN=Tc00.1047053507831.70 PE=4 SV=1	1	13	13	6	38	8	9	11	10	8	9	11	10	4	5	5	5	40.2	40.2	17.7	42.77	378	378	1	122	0	87.58	By MS/MS	By MS/MS	By MS/MS	By MS/MS	By MS/MS	By MS/MS	23.8	28.8	21.2	24.1	35.2	29.1	9076100000	1635800000	1960500000	1444100000	2245100000
tr|Q4E4N2|Q4E4N2_TRYCC	tr|Q4E4N2|Q4E4N2_TRYCC	12	12	12	>tr|Q4E4N2|Q4E4N2_TRYCC Protein phosphatase, putative OS=Trypanosoma cruzi (strain CL Brener) GN=Tc00.1047053506925.150 PE=3 SV=1	1	12	12	12	38	9	8	10	11	9	8	10	11	9	8	10	11	33.9	33.9	33.9	45634	407	407	1	152	0	195.88	By MS/MS	By MS/MS	By MS/MS	By MS/MS	By MS/MS	By MS/MS	25.6	27	24.8	22.6	29.7	33.9	11156000000	1910900000	2416300000	1865200000	3309100000
tr|Q4DRT8|Q4DRT8_TRYCC	tr|Q4DRT8|Q4DRT8_TRYCC	11	11	7	>tr|Q4DRT8|Q4DRT8_TRYCC Delta-1-pyrroline-5-carboxylate dehydrogenase, putative OS=Trypanosoma cruzi (strain CL Brener) GN=Tc00.1047053510943.50 PE=3 SV=1	1	11	11	7	38	9	9	11	9	9	9	11	9	5	5	7	6	28.5	28.5	20.1	62476	561	561	1	127	0	81448	By MS/MS	By MS/MS	By MS/MS	By MS/MS	By MS/MS	By MS/MS	20.3	23.5	21.9	15	28.5	23.9	10156000000	2066200000	2879200000	1474900000	2088600000
tr|Q4DFS6|Q4DFS6_TRYCC	tr|Q4DFS6|Q4DFS6_TRYCC	11	11	2	>tr|Q4DFS6|Q4DFS6_TRYCC Ribonucleoside-diphosphate reductase small chain, putative OS=Trypanosoma cruzi (strain CL Brener) GN=Tc00.1047053511555.80 PE=4 SV=1	1	11	11	2	38	9	8	10	11	9	8	10	11	2	2	2	2	42.7	42.7	6.8	39077	337	337	1	118	0	134.18	By MS/MS	By MS/MS	By MS/MS	By MS/MS	By MS/MS	By MS/MS	33.8	29.7	26.4	20.5	39.5	42.7	7806400000	1259200000	1722300000	1482100000	2582300000
tr|Q4DNV8|Q4DNV8_TRYCC	tr|Q4DNV8|Q4DNV8_TRYCC	13	13	0	>tr|Q4DNV8|Q4DNV8_TRYCC Phosphoglycerate kinase OS=Trypanosoma cruzi (strain CL Brener) GN=Tc00.1047053505999.90 PE=3 SV=1	1	13	13	0	38	7	7	11	13	7	7	11	13	0	0	0	0	38.2	38.2	0	44487	419	419	1	137	0	58187	By MS/MS	By MS/MS	By MS/MS	By MS/MS	By MS/MS	By MS/MS	20.3	19.6	21.2	18.4	29.8	38.2	10742000000	1538900000	1952800000	2041900000	2719800000
tr|Q4D0Q0|Q4D0Q0_TRYCC	tr|Q4D0Q0|Q4D0Q0_TRYCC	11	11	1	>tr|Q4D0Q0|Q4D0Q0_TRYCC Fructose-bisphosphate aldolase OS=Trypanosoma cruzi (strain CL Brener) GN=Tc00.1047053510301.20 PE=3 SV=1	1	11	11	1	38	9	9	10	10	9	9	10	10	1	1	1	1	46.5	46.5	3.2	40807	372	372	1	156	0	134.77	By MS/MS	By MS/MS	By MS/MS	By MS/MS	By MS/MS	By MS/MS	36	38.2	41.9	38.4	42.2	42.2	7785600000	1088600000	1460200000	1181900000	2167600000
tr|Q4DEP1|Q4DEP1_TRYCC	tr|Q4DEP1|Q4DEP1_TRYCC	11	11	11	>tr|Q4DEP1|Q4DEP1_TRYCC Heat shock protein HslVU, ATPase subunit HslU, putative OS=Trypanosoma cruzi (strain CL Brener) GN=Tc00.1047053506739.50 PE=4 SV=1	1	11	11	11	38	8	9	11	10	8	9	11	10	8	9	11	10	32.5	32.5	32.5	52242	474	474	1	124	0	159.57	By MS/MS	By MS/MS	By MS/MS	By MS/MS	By MS/MS	By MS/MS	19.4	24.7	16.7	19.4	32.5	26.6	7490600000	1162000000	1466500000	1375000000	1994200000
tr|Q4D6V2|Q4D6V2_TRYCC	tr|Q4D6V2|Q4D6V2_TRYCC	11	2	2	>tr|Q4D6V2|Q4D6V2_TRYCC Ribonucleoside-diphosphate reductase small chain, putative OS=Trypanosoma cruzi (strain CL Brener) GN=Tc00.1047053506621.30 PE=4 SV=1	1	11	2	2	38	9	8	10	11	2	2	2	2	2	2	2	2	42.7	6.8	6.8	39024	337	337	1	25	0	16775	By MS/MS	By MS/MS	By MS/MS	By MS/MS	By MS/MS	By MS/MS	33.8	29.7	26.4	20.5	39.5	42.7	3621700000	733170000	888150000	388210000	1024100000
tr|Q4DJU4|Q4DJU4_TRYCC;tr|Q4DEY4|Q4DEY4_TRYCC	tr|Q4DJU4|Q4DJU4_TRYCC;tr|Q4DEY4|Q4DEY4_TRYCC	13;13	13;13	13;13	>tr|Q4DJU4|Q4DJU4_TRYCC ATP-dependent zinc metallopeptidase, putative OS=Trypanosoma cruzi (strain CL Brener) GN=Tc00.1047053511717.170 PE=3 SV=1;>tr|Q4DEY4|Q4DEY4_TRYCC ATP-dependent zinc metallopeptidase, putative OS=Trypanosoma cruzi (strain CL Brener)	2	13	13	13	38	7	9	11	11	7	9	11	11	7	9	11	11	21.3	21.3	21.3	75.71	682	682;683	1	103	0	187.7	By MS/MS	By MS/MS	By MS/MS	By MS/MS	By MS/MS	By MS/MS	13.9	17	12.5	12.5	21	19.4	4326600000	746910000	928270000	691270000	981780000
tr|Q4DPH7|Q4DPH7_TRYCC;tr|Q4CT98|Q4CT98_TRYCC;tr|Q4CT99|Q4CT99_TRYCC;tr|Q4DHW6|Q4DHW6_TRYCC;tr|Q4DPH6|Q4DPH6_TRYCC	tr|Q4DPH7|Q4DPH7_TRYCC;tr|Q4CT98|Q4CT98_TRYCC	12;7;3;2;2	12;7;3;2;2	12;7;3;2;2	>tr|Q4DPH7|Q4DPH7_TRYCC Uncharacterized protein OS=Trypanosoma cruzi (strain CL Brener) GN=Tc00.1047053510861.40 PE=4 SV=1;>tr|Q4CT98|Q4CT98_TRYCC Uncharacterized protein (Fragment) OS=Trypanosoma cruzi (strain CL Brener) GN=Tc00.1047053507647.39 PE=4 SV=1	5	12	12	12	38	8	8	11	11	8	8	11	11	8	8	11	11	28.7	28.7	28.7	61484	550	550;275;141;114;141	1	123	0	135.15	By MS/MS	By MS/MS	By MS/MS	By MS/MS	By MS/MS	By MS/MS	21.8	21.8	17.3	20.2	28.7	26.2	4647000000	742810000	726820000	779630000	1392400000
tr|Q4D234|Q4D234_TRYCC;tr|Q4D3R5|Q4D3R5_TRYCC	tr|Q4D234|Q4D234_TRYCC	14;6	14;6	9;6	>tr|Q4D234|Q4D234_TRYCC Uncharacterized protein OS=Trypanosoma cruzi (strain CL Brener) GN=Tc00.1047053507529.50 PE=4 SV=1	2	14	14	9	38	8	6	13	11	8	6	13	11	6	5	8	8	31.3	31.3	22.7	72919	665	665;174	1	99	0	126.01	By MS/MS	By MS/MS	By MS/MS	By MS/MS	By MS/MS	By MS/MS	17.9	13.7	14.3	6.9	28.4	27.5	3668300000	431990000	679570000	955920000	1198800000
tr|Q4D006|Q4D006_TRYCC	tr|Q4D006|Q4D006_TRYCC	12	12	3	>tr|Q4D006|Q4D006_TRYCC Uncharacterized protein OS=Trypanosoma cruzi (strain CL Brener) GN=Tc00.1047053509563.50 PE=4 SV=1	1	12	12	3	38	10	9	9	10	10	9	9	10	3	3	3	3	13.4	13.4	4.7	129.2	1194	1194	1	134	0	306.13	By MS/MS	By MS/MS	By MS/MS	By MS/MS	By MS/MS	By MS/MS	11.1	11.1	9.7	8.2	10.1	12.2	3263600000	791940000	604540000	462160000	871030000
tr|Q4D4S0|Q4D4S0_TRYCC;tr|Q4D4R9|Q4D4R9_TRYCC;tr|Q4D0Q1|Q4D0Q1_TRYCC	tr|Q4D4S0|Q4D4S0_TRYCC;tr|Q4D4R9|Q4D4R9_TRYCC;tr|Q4D0Q1|Q4D0Q1_TRYCC	11;11;6	1;1;0	1;1;0	>tr|Q4D4S0|Q4D4S0_TRYCC Fructose-bisphosphate aldolase OS=Trypanosoma cruzi (strain CL Brener) GN=Tc00.1047053504163.40 PE=3 SV=1;>tr|Q4D4R9|Q4D4R9_TRYCC Fructose-bisphosphate aldolase OS=Trypanosoma cruzi (strain CL Brener) GN=Tc00.1047053504163.50 PE=3 S	3	11	1	1	38	9	9	10	10	1	1	1	1	1	1	1	1	46.5	3.2	3.2	40833	372	372;372;214	1	17	0	24975	By MS/MS	By MS/MS	By MS/MS	By MS/MS	By MS/MS	By MS/MS	36	38.2	41.9	38.4	42.2	42.2	885500000	163640000	172030000	131610000	213560000
tr|Q4CW17|Q4CW17_TRYCC	tr|Q4CW17|Q4CW17_TRYCC	11	1	1	>tr|Q4CW17|Q4CW17_TRYCC Transketolase, putative (Fragment) OS=Trypanosoma cruzi (strain CL Brener) GN=Tc00.1047053511067.30 PE=4 SV=1	1	11	1	1	38	8	9	10	11	1	1	1	1	1	1	1	1	29.2	1.5	1.5	57.87	534	534	1	12	1	-2	By MS/MS	By MS/MS	By MS/MS	By MS/MS	By MS/MS	By MS/MS	19.1	23	19.1	19.1	27.5	29.2	741330000	118610000	186020000	90932000	177480000
tr|Q4DGE1|Q4DGE1_TRYCC	tr|Q4DGE1|Q4DGE1_TRYCC	11	1	1	>tr|Q4DGE1|Q4DGE1_TRYCC Squalene monooxygenase, putative (Fragment) OS=Trypanosoma cruzi (strain CL Brener) GN=Tc00.1047053503999.10 PE=4 SV=1	1	11	1	1	38	10	9	9	10	1	1	1	1	1	1	1	1	31.6	3.8	3.8	44985	399	399	1	10	0	44104	By MS/MS	By MS/MS	By MS/MS	By MS/MS	By matching	By MS/MS	31.1	29.1	20.8	23.1	27.6	31.3	533390000	134660000	118310000	27516000	152040000
tr|Q4CNI4|Q4CNI4_TRYCC	tr|Q4CNI4|Q4CNI4_TRYCC	13	5	3	>tr|Q4CNI4|Q4CNI4_TRYCC Uncharacterized protein OS=Trypanosoma cruzi (strain CL Brener) GN=Tc00.1047053510683.20 PE=4 SV=1	1	13	5	3	38	8	6	13	11	2	2	5	4	2	2	3	3	36	14.8	10.1	65457	575	575	1	33	0	28051	By MS/MS	By MS/MS	By MS/MS	By MS/MS	By MS/MS	By MS/MS	21.2	17.4	21.2	21.2	36	32	1275800000	179360000	152870000	241610000	501800000
tr|Q4DTU3|Q4DTU3_TRYCC	tr|Q4DTU3|Q4DTU3_TRYCC	12	1	1	>tr|Q4DTU3|Q4DTU3_TRYCC Obg-like ATPase 1 OS=Trypanosoma cruzi (strain CL Brener) GN=Tc00.1047053504741.20 PE=3 SV=1	1	12	1	1	38	8	8	10	12	1	1	1	1	1	1	1	1	39.3	3.8	3.8	44.29	394	394	1	16	0.0011054	22265	By MS/MS	By MS/MS	By MS/MS	By MS/MS	By MS/MS	By MS/MS	25.9	24.9	25.9	25.4	30.7	39.3	651730000	79039000	81629000	179220000	227690000
tr|Q4D193|Q4D193_TRYCC	tr|Q4D193|Q4D193_TRYCC	13	1	0	>tr|Q4D193|Q4D193_TRYCC Phosphoglycerate kinase OS=Trypanosoma cruzi (strain CL Brener) GN=Tc00.1047053511419.40 PE=3 SV=1	1	13	1	0	38	7	7	11	13	1	1	1	1	0	0	0	0	38.2	6	0	44469	419	419	1	9	0	98386	By matching	By MS/MS	By matching	By matching	By MS/MS	By MS/MS	20.3	19.6	15.3	18.4	29.8	38.2	295010000	57679000	90124000	45233000	92241000
tr|Q4E3N1|Q4E3N1_TRYCC;tr|Q4E0R5|Q4E0R5_TRYCC	tr|Q4E3N1|Q4E3N1_TRYCC;tr|Q4E0R5|Q4E0R5_TRYCC	16;11	16;11	16;11	>tr|Q4E3N1|Q4E3N1_TRYCC Uncharacterized protein OS=Trypanosoma cruzi (strain CL Brener) GN=Tc00.1047053510101.300 PE=4 SV=1;>tr|Q4E0R5|Q4E0R5_TRYCC Uncharacterized protein OS=Trypanosoma cruzi (strain CL Brener) GN=Tc00.1047053506297.30 PE=4 SV=1	2	16	16	16	38	5	5	14	14	5	5	14	14	5	5	14	14	15	15	15	154.66	1406	1406;1406	1	66	0	42221	By MS/MS	By MS/MS	By matching	By MS/MS	By MS/MS	By MS/MS	5.3	4.3	1.6	2.8	13.7	12.9	1516400000	155240000	297610000	327960000	629550000
tr|Q4D6K0|Q4D6K0_TRYCC	tr|Q4D6K0|Q4D6K0_TRYCC	13	3	3	>tr|Q4D6K0|Q4D6K0_TRYCC Ubiquitin-like protein, putative OS=Trypanosoma cruzi (strain CL Brener) GN=Tc00.1047053511855.20 PE=4 SV=1	1	13	3	3	38	9	7	12	10	2	2	3	2	2	2	3	2	33.8	11.2	11.2	69121	624	624	1	33	0	12651	By MS/MS	By MS/MS	By MS/MS	By MS/MS	By MS/MS	By MS/MS	20.5	17.6	17.8	17.8	33.8	22.1	361800000	46235000	55967000	49429000	178730000
tr|Q4E418|Q4E418_TRYCC	tr|Q4E418|Q4E418_TRYCC	12	2	2	>tr|Q4E418|Q4E418_TRYCC Uncharacterized protein OS=Trypanosoma cruzi (strain CL Brener) GN=Tc00.1047053511127.20 PE=4 SV=1	1	12	2	2	38	8	8	12	10	2	2	2	2	2	2	2	2	23.9	5.8	5.8	66341	582	582	1	25	0	10376	By MS/MS	By MS/MS	By MS/MS	By MS/MS	By MS/MS	By MS/MS	16.3	17.5	17	15.6	23.9	20.3	384390000	83531000	46752000	44104000	126870000
tr|Q4CM68|Q4CM68_TRYCC	tr|Q4CM68|Q4CM68_TRYCC	10	10	10	>tr|Q4CM68|Q4CM68_TRYCC 3-oxo-5-alpha-steroid 4-dehydrogenase, putative (Fragment) OS=Trypanosoma cruzi (strain CL Brener) GN=Tc00.1047053457251.10 PE=4 SV=1	1	10	10	10	37	9	9	10	9	9	9	10	9	9	9	10	9	40.7	40.7	40.7	29604	263	263	1	128	0	69365	By MS/MS	By MS/MS	By MS/MS	By MS/MS	By MS/MS	By MS/MS	32.3	32.3	32.3	32.3	40.7	32.3	11209000000	1776500000	2885400000	1483100000	2534600000
tr|Q4CQP1|Q4CQP1_TRYCC	tr|Q4CQP1|Q4CQP1_TRYCC	10	10	1	>tr|Q4CQP1|Q4CQP1_TRYCC Uncharacterized protein OS=Trypanosoma cruzi (strain CL Brener) GN=Tc00.1047053511065.10 PE=4 SV=1	1	10	10	1	37	9	8	10	10	9	8	10	10	1	1	1	1	44.4	44.4	4.1	29817	266	266	1	127	0	57685	By MS/MS	By MS/MS	By MS/MS	By MS/MS	By MS/MS	By MS/MS	35.3	33.1	32.7	32.7	44.4	44.4	5913300000	825520000	1130900000	958930000	1544700000
tr|Q4D004|Q4D004_TRYCC	tr|Q4D004|Q4D004_TRYCC	12	5	5	>tr|Q4D004|Q4D004_TRYCC Protein disulfide isomerase, putative (Fragment) OS=Trypanosoma cruzi (strain CL Brener) GN=Tc00.1047053509505.10 PE=3 SV=1	1	12	5	5	37	7	7	11	12	2	2	4	5	2	2	4	5	46.8	22.4	22.4	29608	263	263	1	42	0	95491	By MS/MS	By MS/MS	By MS/MS	By MS/MS	By MS/MS	By MS/MS	30	30	34.2	34.2	46.8	46.8	3890700000	631790000	983260000	576220000	848660000
tr|Q4DVH1|Q4DVH1_TRYCC;tr|Q4CNM9|Q4CNM9_TRYCC;tr|Q4DJA4|Q4DJA4_TRYCC	tr|Q4DVH1|Q4DVH1_TRYCC	12;3;2	12;3;2	12;3;2	>tr|Q4DVH1|Q4DVH1_TRYCC Proteasome regulatory ATPase subunit 5, putative OS=Trypanosoma cruzi (strain CL Brener) GN=Tc00.1047053506859.20 PE=3 SV=1	3	12	12	12	37	7	7	12	11	7	7	12	11	7	7	12	11	36.1	36.1	36.1	49054	441	441;127;145	1	118	0	62624	By MS/MS	By MS/MS	By MS/MS	By MS/MS	By MS/MS	By MS/MS	17.2	17.2	17.2	17.2	36.1	33.3	5432500000	818320000	1300200000	926820000	1409900000
tr|Q4DAD9|Q4DAD9_TRYCC	tr|Q4DAD9|Q4DAD9_TRYCC	12	3	3	>tr|Q4DAD9|Q4DAD9_TRYCC Nucleoside phosphorylase, putative (Fragment) OS=Trypanosoma cruzi (strain CL Brener) GN=Tc00.1047053508989.9 PE=4 SV=1	1	12	3	3	37	6	8	11	12	2	2	3	3	2	2	3	3	51.7	15	15	28926	267	267	1	45	0	55902	By MS/MS	By MS/MS	By MS/MS	By MS/MS	By MS/MS	By MS/MS	22.8	30.7	20.2	16.9	50.9	51.7	3091900000	500130000	700620000	470750000	704490000
tr|Q4E1X3|Q4E1X3_TRYCC	tr|Q4E1X3|Q4E1X3_TRYCC	10	10	3	>tr|Q4E1X3|Q4E1X3_TRYCC Uncharacterized protein OS=Trypanosoma cruzi (strain CL Brener) GN=Tc00.1047053507993.40 PE=4 SV=1	1	10	10	3	37	9	8	10	10	9	8	10	10	2	2	3	3	24.3	24.3	9.6	49936	460	460	1	106	0	65651	By MS/MS	By MS/MS	By MS/MS	By MS/MS	By MS/MS	By MS/MS	21.7	19.6	19.6	19.6	24.3	24.3	4859200000	888160000	766730000	956630000	1423200000
tr|Q4DHE0|Q4DHE0_TRYCC	tr|Q4DHE0|Q4DHE0_TRYCC	12	12	2	>tr|Q4DHE0|Q4DHE0_TRYCC Eukaryotic translation initiation factor 3 subunit 7-like protein, putative OS=Trypanosoma cruzi (strain CL Brener) GN=Tc00.1047053509065.160 PE=3 SV=1	1	12	12	2	37	8	9	9	11	8	9	9	11	1	2	2	2	30.1	30.1	4.8	57336	502	502	1	101	0	109.59	By MS/MS	By MS/MS	By MS/MS	By MS/MS	By MS/MS	By MS/MS	20.5	19.5	14.7	16.9	25.7	29.9	3765600000	584320000	942980000	507200000	1122600000
tr|Q4CW46|Q4CW46_TRYCC	tr|Q4CW46|Q4CW46_TRYCC	12	1	1	>tr|Q4CW46|Q4CW46_TRYCC Seryl-tRNA synthetase, putative (Fragment) OS=Trypanosoma cruzi (strain CL Brener) GN=Tc00.1047053511163.10 PE=4 SV=1	1	12	1	1	37	7	6	12	12	1	1	1	1	1	1	1	1	59	6.2	6.2	25713	227	227	1	13	0	26042	By MS/MS	By MS/MS	By MS/MS	By MS/MS	By MS/MS	By MS/MS	34.4	34.4	27.8	27.8	59	59	1648100000	326330000	350390000	188400000	336480000
tr|Q4CXJ8|Q4CXJ8_TRYCC	tr|Q4CXJ8|Q4CXJ8_TRYCC	11	11	2	>tr|Q4CXJ8|Q4CXJ8_TRYCC Calpain-like cysteine peptidase, putative OS=Trypanosoma cruzi (strain CL Brener) GN=Tc00.1047053510337.20 PE=3 SV=1	1	11	11	2	37	10	9	9	9	10	9	9	9	1	1	2	2	18.2	18.2	4.6	95384	850	850	1	100	0	44965	By MS/MS	By MS/MS	By MS/MS	By MS/MS	By MS/MS	By MS/MS	17.1	15.8	13.1	12.8	15.6	15.5	3297400000	671120000	889660000	503010000	847500000
tr|Q4D779|Q4D779_TRYCC	tr|Q4D779|Q4D779_TRYCC	11	3	1	>tr|Q4D779|Q4D779_TRYCC NADH-dependent fumarate reductase, putative OS=Trypanosoma cruzi (strain CL Brener) GN=Tc00.1047053503849.60 PE=4 SV=1	1	11	3	1	37	8	8	11	10	2	2	3	3	1	1	1	1	19.4	7.2	2.4	85.49	789	789	1	42	0	90285	By MS/MS	By MS/MS	By MS/MS	By MS/MS	By MS/MS	By MS/MS	13.4	13.4	13.4	13.4	19.4	18	1568000000	207740000	331590000	259810000	569420000
tr|Q4DH64|Q4DH64_TRYCC	tr|Q4DH64|Q4DH64_TRYCC	10	3	3	>tr|Q4DH64|Q4DH64_TRYCC Uncharacterized protein OS=Trypanosoma cruzi (strain CL Brener) GN=Tc00.1047053509207.40 PE=4 SV=1	1	10	3	3	37	9	9	10	9	2	3	3	3	2	3	3	3	31.7	22.4	22.4	125.04	1136	1136	1	28	0	26697	By MS/MS	By MS/MS	By MS/MS	By MS/MS	By MS/MS	By MS/MS	28.7	29.7	28.6	31.7	31.7	29.7	1417400000	156930000	351150000	220300000	413470000
tr|Q4DU76|Q4DU76_TRYCC	tr|Q4DU76|Q4DU76_TRYCC	10	1	1	>tr|Q4DU76|Q4DU76_TRYCC Uncharacterized protein OS=Trypanosoma cruzi (strain CL Brener) GN=Tc00.1047053511903.190 PE=4 SV=1	1	10	1	1	37	9	8	10	10	1	1	1	1	1	1	1	1	44.4	4.1	4.1	29829	266	266	1	12	0	17162	By MS/MS	By MS/MS	By MS/MS	By MS/MS	By MS/MS	By MS/MS	35.3	33.1	32.7	32.7	44.4	44.4	504870000	81629000	114900000	68947000	90172000
tr|Q4CVE1|Q4CVE1_TRYCC	tr|Q4CVE1|Q4CVE1_TRYCC	12	12	7	>tr|Q4CVE1|Q4CVE1_TRYCC Uncharacterized protein OS=Trypanosoma cruzi (strain CL Brener) GN=Tc00.1047053507933.10 PE=4 SV=1	1	12	12	7	37	9	8	11	9	9	8	11	9	5	4	6	5	15.6	15.6	8.1	260.42	2323	2323	1	109	0	52333	By MS/MS	By MS/MS	By MS/MS	By MS/MS	By MS/MS	By MS/MS	12.4	11.8	9.1	9.8	14.9	13.1	2846700000	513460000	670260000	458380000	571650000
tr|Q4CU34|Q4CU34_TRYCC	tr|Q4CU34|Q4CU34_TRYCC	13	3	3	>tr|Q4CU34|Q4CU34_TRYCC Uncharacterized protein OS=Trypanosoma cruzi (strain CL Brener) GN=Tc00.1047053511573.20 PE=4 SV=1	1	13	3	3	37	8	7	10	12	2	2	1	3	2	2	1	3	30.7	9.3	9.3	59.76	537	537	1	16	0	27741	By MS/MS	By MS/MS	By MS/MS	By MS/MS	By MS/MS	By MS/MS	18.6	13.8	6	6	24.8	30.5	360360000	79126000	129750000	41237000	44489000
tr|Q4D4S4|Q4D4S4_TRYCC	tr|Q4D4S4|Q4D4S4_TRYCC	10	1	1	>tr|Q4D4S4|Q4D4S4_TRYCC Uncharacterized protein (Fragment) OS=Trypanosoma cruzi (strain CL Brener) GN=Tc00.1047053511537.69 PE=4 SV=1	1	10	1	1	37	8	9	10	10	0	1	1	1	0	1	1	1	45.3	9.7	9.7	27095	247	247	1	6	0	146.51	By matching	By matching	By matching	By MS/MS	By MS/MS	By MS/MS	30.4	40.1	35.2	37.2	45.3	45.3	259150000	0	12729000	79831000	166590000
tr|Q4DBH4|Q4DBH4_TRYCC	tr|Q4DBH4|Q4DBH4_TRYCC	11	2	2	>tr|Q4DBH4|Q4DBH4_TRYCC Calpain-like cysteine peptidase, putative OS=Trypanosoma cruzi (strain CL Brener) GN=Tc00.1047053503855.40 PE=3 SV=1	1	11	2	2	37	10	9	9	9	1	1	2	2	1	1	2	2	18.5	4.8	4.8	95217	850	850	1	10	0.0096754	12659	By MS/MS	By MS/MS	By matching	By matching	By MS/MS	By matching	15.1	13.8	11.1	10.8	15.9	15.8	156560000	16916000	29456000	42697000	56266000
tr|Q4DF36|Q4DF36_TRYCC	tr|Q4DF36|Q4DF36_TRYCC	11	1	1	>tr|Q4DF36|Q4DF36_TRYCC Cystathionine beta-synthase, putative OS=Trypanosoma cruzi (strain CL Brener) GN=Tc00.1047053508177.129 PE=4 SV=1	1	11	1	1	37	7	9	11	10	0	0	1	1	0	0	1	1	46.9	6.9	6.9	30432	275	275	1	4	1	-2	By matching	By matching	By matching	By matching	By matching	By MS/MS	31.6	39.6	30.2	33.1	46.9	40.4	147040000	0	0	52818000	94223000
tr|Q4DQ49|Q4DQ49_TRYCC	tr|Q4DQ49|Q4DQ49_TRYCC	9	9	9	>tr|Q4DQ49|Q4DQ49_TRYCC Centrin, putative OS=Trypanosoma cruzi (strain CL Brener) GN=Tc00.1047053508323.60 PE=4 SV=1	1	9	9	9	36	9	9	9	9	9	9	9	9	9	9	9	9	77.9	77.9	77.9	16523	149	149	1	152	0	167.16	By MS/MS	By MS/MS	By MS/MS	By MS/MS	By MS/MS	By MS/MS	77.9	77.9	77.9	56.4	77.9	77.9	29274000000	5061400000	6907600000	4108900000	7714500000
tr|Q4DRH6|Q4DRH6_TRYCC	tr|Q4DRH6|Q4DRH6_TRYCC	11	11	1	>tr|Q4DRH6|Q4DRH6_TRYCC 14-3-3 protein, putative OS=Trypanosoma cruzi (strain CL Brener) GN=Tc00.1047053506775.80 PE=3 SV=1	1	11	11	1	36	7	8	11	10	7	8	11	10	1	1	1	1	63.1	63.1	9.9	29104	252	252	1	188	0	150.5	By MS/MS	By MS/MS	By MS/MS	By MS/MS	By MS/MS	By MS/MS	42.9	45.6	45.6	42.9	63.1	59.5	36401000000	6370400000	7674400000	5913000000	8655800000
tr|Q4DGT6|Q4DGT6_TRYCC	tr|Q4DGT6|Q4DGT6_TRYCC	10	10	7	>tr|Q4DGT6|Q4DGT6_TRYCC Uncharacterized protein OS=Trypanosoma cruzi (strain CL Brener) GN=Tc00.1047053507081.130 PE=4 SV=1	1	10	10	7	36	9	8	10	9	9	8	10	9	6	6	7	6	48.6	48.6	37.4	29932	278	278	1	182	0	121.38	By MS/MS	By MS/MS	By MS/MS	By MS/MS	By MS/MS	By MS/MS	48.6	36.3	48.6	40.3	48.6	48.6	15331000000	1716300000	2407500000	3123800000	4911100000
tr|Q4CSK3|Q4CSK3_TRYCC;tr|Q4CKW4|Q4CKW4_TRYCC	tr|Q4CSK3|Q4CSK3_TRYCC;tr|Q4CKW4|Q4CKW4_TRYCC	11;7	11;7	11;7	>tr|Q4CSK3|Q4CSK3_TRYCC Uncharacterized protein OS=Trypanosoma cruzi (strain CL Brener) GN=Tc00.1047053506235.20 PE=4 SV=1;>tr|Q4CKW4|Q4CKW4_TRYCC Uncharacterized protein (Fragment) OS=Trypanosoma cruzi (strain CL Brener) GN=Tc00.1047053413977.10 PE=4 SV=1	2	11	11	11	36	10	8	9	9	10	8	9	9	10	8	9	9	34.9	34.9	34.9	55065	484	484;266	1	115	0	253.89	By MS/MS	By MS/MS	By MS/MS	By MS/MS	By MS/MS	By MS/MS	32.2	25.2	23.3	20.5	25.4	29.3	7582100000	1306100000	1717300000	1160500000	2073100000
tr|Q4D3W3|Q4D3W3_TRYCC;tr|Q4DGV1|Q4DGV1_TRYCC	tr|Q4D3W3|Q4D3W3_TRYCC;tr|Q4DGV1|Q4DGV1_TRYCC	9;9	9;9	2;2	>tr|Q4D3W3|Q4D3W3_TRYCC Aspartate carbamoyltransferase, putative OS=Trypanosoma cruzi (strain CL Brener) GN=Tc00.1047053508375.30 PE=1 SV=1;>tr|Q4DGV1|Q4DGV1_TRYCC Aspartate carbamoyltransferase, putative OS=Trypanosoma cruzi (strain CL Brener) GN=Tc00.104	2	9	9	2	36	9	9	9	9	9	9	9	9	2	2	2	2	26.4	26.4	7.4	35.95	326	326;327	1	122	0	27777	By MS/MS	By MS/MS	By MS/MS	By MS/MS	By MS/MS	By MS/MS	26.4	26.4	23	23	26.4	26.4	6924800000	1106400000	1339800000	1097300000	1927700000
tr|Q4DYH1|Q4DYH1_TRYCC	tr|Q4DYH1|Q4DYH1_TRYCC	11	11	11	>tr|Q4DYH1|Q4DYH1_TRYCC Uncharacterized protein OS=Trypanosoma cruzi (strain CL Brener) GN=Tc00.1047053511367.220 PE=4 SV=1	1	11	11	11	36	8	10	9	9	8	10	9	9	8	10	9	9	28	28	28	56715	497	497	1	116	0	30147	By MS/MS	By MS/MS	By MS/MS	By MS/MS	By MS/MS	By MS/MS	22.5	26.4	22.3	22.3	23.9	24.3	9117400000	1271400000	1782200000	1543800000	2805300000
tr|Q4DG52|Q4DG52_TRYCC;tr|Q4DCB8|Q4DCB8_TRYCC	tr|Q4DG52|Q4DG52_TRYCC;tr|Q4DCB8|Q4DCB8_TRYCC	10;9	10;9	10;9	>tr|Q4DG52|Q4DG52_TRYCC Electron-transfer-flavoprotein, alpha polypeptide, putative OS=Trypanosoma cruzi (strain CL Brener) GN=Tc00.1047053511693.90 PE=4 SV=1;>tr|Q4DCB8|Q4DCB8_TRYCC Electron-transfer-flavoprotein, alpha polypeptide, putative OS=Trypanosom	2	10	10	10	36	8	9	10	9	8	9	10	9	8	9	10	9	37.4	37.4	37.4	33484	321	321;321	1	108	0	86512	By MS/MS	By MS/MS	By MS/MS	By MS/MS	By MS/MS	By MS/MS	26.2	29.6	23.4	26.2	37.4	29.6	7088700000	1019500000	1711300000	1098600000	1873900000
tr|Q4DJ69|Q4DJ69_TRYCC	tr|Q4DJ69|Q4DJ69_TRYCC	11	11	3	>tr|Q4DJ69|Q4DJ69_TRYCC Malic enzyme OS=Trypanosoma cruzi (strain CL Brener) GN=Tc00.1047053505183.20 PE=3 SV=1	1	11	11	3	36	9	8	10	9	9	8	10	9	2	1	3	2	23.9	23.9	5.6	63615	573	573	1	123	0	79783	By MS/MS	By MS/MS	By MS/MS	By MS/MS	By MS/MS	By MS/MS	20.1	19.7	20.1	20.1	21.5	21.1	5636900000	965520000	977120000	860680000	1600400000
tr|Q4CZX4|Q4CZX4_TRYCC	tr|Q4CZX4|Q4CZX4_TRYCC	13	13	2	>tr|Q4CZX4|Q4CZX4_TRYCC V-type ATPase, A subunit, putative OS=Trypanosoma cruzi (strain CL Brener) GN=Tc00.1047053503929.10 PE=3 SV=1	1	13	13	2	36	6	7	10	13	6	7	10	13	1	1	2	2	29	29	5.7	67985	610	610	1	97	0	215.81	By MS/MS	By MS/MS	By MS/MS	By MS/MS	By MS/MS	By MS/MS	13.3	13.1	9.2	8.4	23.3	29	6990500000	1080000000	1407900000	1299500000	2183000000
tr|Q4DQN6|Q4DQN6_TRYCC	tr|Q4DQN6|Q4DQN6_TRYCC	11	11	6	>tr|Q4DQN6|Q4DQN6_TRYCC Calpain cysteine peptidase, putative OS=Trypanosoma cruzi (strain CL Brener) GN=Tc00.1047053506563.200 PE=3 SV=1	1	11	11	6	36	9	9	9	9	9	9	9	9	5	5	5	5	22.2	22.2	11.1	82629	729	729	1	121	0	135.17	By MS/MS	By MS/MS	By MS/MS	By MS/MS	By MS/MS	By MS/MS	18.2	18.2	15.8	19.6	19.6	18.2	5609700000	897250000	1336800000	645770000	1196200000
tr|Q4DH96|Q4DH96_TRYCC;tr|Q4DC19|Q4DC19_TRYCC	tr|Q4DH96|Q4DH96_TRYCC;tr|Q4DC19|Q4DC19_TRYCC	11;11	11;11	11;11	>tr|Q4DH96|Q4DH96_TRYCC ATP-dependent RNA helicase, putative OS=Trypanosoma cruzi (strain CL Brener) GN=Tc00.1047053511285.120 PE=3 SV=1;>tr|Q4DC19|Q4DC19_TRYCC ATP-dependent RNA helicase, putative OS=Trypanosoma cruzi (strain CL Brener) GN=Tc00.1047053506	2	11	11	11	36	8	7	10	11	8	7	10	11	8	7	10	11	24.3	24.3	24.3	68593	630	630;631	1	111	0	155.35	By MS/MS	By MS/MS	By MS/MS	By MS/MS	By MS/MS	By MS/MS	14.1	11.7	12.7	12.7	22.5	24.3	6404800000	808210000	1026000000	1236800000	2511600000
tr|Q4D0T3|Q4D0T3_TRYCC	tr|Q4D0T3|Q4D0T3_TRYCC	13	13	13	>tr|Q4D0T3|Q4D0T3_TRYCC Pumilio/PUF RNA binding protein 6, putative OS=Trypanosoma cruzi (strain CL Brener) GN=Tc00.1047053510125.10 PE=4 SV=1	1	13	13	13	36	7	7	10	12	7	7	10	12	7	7	10	12	23.7	23.7	23.7	91801	827	827	1	118	0	182.02	By MS/MS	By MS/MS	By MS/MS	By MS/MS	By MS/MS	By MS/MS	12.3	12.3	10	8.7	18.1	22.1	3743400000	628440000	849250000	627010000	971880000
tr|Q4DSC5|Q4DSC5_TRYCC	tr|Q4DSC5|Q4DSC5_TRYCC	10	3	3	>tr|Q4DSC5|Q4DSC5_TRYCC Pyridoxal phosphate homeostasis protein OS=Trypanosoma cruzi (strain CL Brener) GN=Tc00.1047053509767.90 PE=3 SV=1	1	10	3	3	36	9	8	9	10	3	2	2	3	3	2	2	3	41.7	15.1	15.1	27347	252	252	1	26	0	84758	By MS/MS	By MS/MS	By MS/MS	By MS/MS	By MS/MS	By MS/MS	40.9	38.5	38.5	41.7	41.7	41.7	1079200000	207930000	277350000	125720000	249300000
tr|Q4DD91|Q4DD91_TRYCC;tr|Q4CLW0|Q4CLW0_TRYCC	tr|Q4DD91|Q4DD91_TRYCC;tr|Q4CLW0|Q4CLW0_TRYCC	13;7	12;6	6;3	>tr|Q4DD91|Q4DD91_TRYCC Fatty acyl CoA synthetase 2, putative OS=Trypanosoma cruzi (strain CL Brener) GN=Tc00.1047053506829.110 PE=4 SV=1;>tr|Q4CLW0|Q4CLW0_TRYCC Fatty acyl CoA synthetase 2, putative (Fragment) OS=Trypanosoma cruzi (strain CL Brener) GN=Tc	2	13	12	6	36	8	8	10	10	7	7	9	9	3	3	4	4	22.2	21.1	9.6	78217	698	698;543	1	97	0	33602	By MS/MS	By MS/MS	By MS/MS	By MS/MS	By MS/MS	By MS/MS	13	11.2	13.6	8.2	18.3	18.8	3212400000	493230000	598920000	646230000	924000000
tr|Q4CNM5|Q4CNM5_TRYCC;tr|Q4CQI1|Q4CQI1_TRYCC	tr|Q4CNM5|Q4CNM5_TRYCC	13;3	12;3	12;3	>tr|Q4CNM5|Q4CNM5_TRYCC ATP-dependent Clp protease subunit, heat shock protein 100 (HSP100), putative (Fragment) OS=Trypanosoma cruzi (strain CL Brener) GN=Tc00.1047053508665.14 PE=4 SV=1	2	13	12	12	36	6	7	10	13	5	6	9	12	5	6	9	12	28.4	26.2	26.2	67591	603	603;188	1	74	0	98.8	By MS/MS	By MS/MS	By MS/MS	By MS/MS	By MS/MS	By MS/MS	10.9	13.6	13.1	11.8	21.2	28.4	3196200000	460280000	532080000	676680000	885310000
tr|Q4DGW8|Q4DGW8_TRYCC;tr|Q4DAI0|Q4DAI0_TRYCC	tr|Q4DGW8|Q4DGW8_TRYCC;tr|Q4DAI0|Q4DAI0_TRYCC	10;9	1;1	1;1	>tr|Q4DGW8|Q4DGW8_TRYCC Aminoacylase, putative OS=Trypanosoma cruzi (strain CL Brener) GN=Tc00.1047053506975.30 PE=4 SV=1;>tr|Q4DAI0|Q4DAI0_TRYCC Aminoacylase, putative OS=Trypanosoma cruzi (strain CL Brener) GN=Tc00.1047053506363.90 PE=4 SV=1	2	10	1	1	36	9	8	10	9	1	1	1	1	1	1	1	1	45.6	7	7	42767	401	401;401	1	18	0	22808	By MS/MS	By MS/MS	By MS/MS	By matching	By MS/MS	By MS/MS	37.9	29.9	34.9	26.9	45.6	37.9	611480000	103130000	236620000	95915000	102930000
tr|Q4DHC9|Q4DHC9_TRYCC	tr|Q4DHC9|Q4DHC9_TRYCC	11	1	1	>tr|Q4DHC9|Q4DHC9_TRYCC 14-3-3 protein, putative OS=Trypanosoma cruzi (strain CL Brener) GN=Tc00.1047053511167.90 PE=3 SV=1	1	11	1	1	36	7	8	11	10	1	1	1	1	1	1	1	1	63.1	9.9	9.9	29113	252	252	1	18	0	38312	By MS/MS	By MS/MS	By MS/MS	By MS/MS	By MS/MS	By MS/MS	42.9	45.6	45.6	42.9	63.1	59.5	998070000	132260000	178020000	148680000	327170000
tr|Q4CUP4|Q4CUP4_TRYCC	tr|Q4CUP4|Q4CUP4_TRYCC	13	5	3	>tr|Q4CUP4|Q4CUP4_TRYCC Retrotransposon hot spot (RHS) protein, putative OS=Trypanosoma cruzi (strain CL Brener) GN=Tc00.1047053506047.20 PE=4 SV=1	1	13	5	3	36	7	7	12	10	1	1	5	3	1	1	3	2	27.6	13.1	6.5	69825	604	604	1	24	0	11341	By matching	By matching	By matching	By matching	By MS/MS	By MS/MS	12.1	12.7	12.6	8.6	26.3	20.7	726840000	47024000	34546000	286850000	358420000
tr|Q4DED4|Q4DED4_TRYCC	tr|Q4DED4|Q4DED4_TRYCC	13	2	2	>tr|Q4DED4|Q4DED4_TRYCC V-type ATPase, A subunit, putative OS=Trypanosoma cruzi (strain CL Brener) GN=Tc00.1047053506405.120 PE=3 SV=1	1	13	2	2	36	6	7	10	13	1	1	2	2	1	1	2	2	29	5.7	5.7	67899	610	610	1	12	0	24886	By matching	By MS/MS	By MS/MS	By MS/MS	By MS/MS	By MS/MS	10.8	10.7	10.8	8.4	23.3	29	169270000	1195900	19803000	68967000	57500000
tr|Q4DTV5|Q4DTV5_TRYCC	tr|Q4DTV5|Q4DTV5_TRYCC	12	1	1	>tr|Q4DTV5|Q4DTV5_TRYCC RuvB-like helicase OS=Trypanosoma cruzi (strain CL Brener) GN=Tc00.1047053508693.80 PE=3 SV=1	1	12	1	1	36	8	8	11	9	0	0	1	1	0	0	1	1	39.9	4.8	4.8	50.08	459	459	1	7	0.0034341	1799	By matching	By matching	By matching	By matching	By MS/MS	By MS/MS	25.5	25.9	18.7	22.4	39.4	33.8	273680000	0	0	84027000	189650000
tr|Q4E3G1|Q4E3G1_TRYCC	tr|Q4E3G1|Q4E3G1_TRYCC	11	1	1	>tr|Q4E3G1|Q4E3G1_TRYCC Eukaryotic translation initiation factor 3 subunit 8, putative OS=Trypanosoma cruzi (strain CL Brener) GN=Tc00.1047053507611.310 PE=4 SV=1	1	11	1	1	36	7	9	10	10	0	0	1	1	0	0	1	1	17.6	2.1	2.1	82218	716	716	1	5	0.0036826	16537	By matching	By matching	By matching	By matching	By MS/MS	By MS/MS	11.9	14.7	11.3	11.6	16.8	16.3	119140000	0	0	51645000	61602000
tr|Q4DUK6|Q4DUK6_TRYCC;tr|Q4DHY2|Q4DHY2_TRYCC	tr|Q4DUK6|Q4DUK6_TRYCC;tr|Q4DHY2|Q4DHY2_TRYCC	9;5	9;5	9;5	>tr|Q4DUK6|Q4DUK6_TRYCC Elongation of fatty acids protein OS=Trypanosoma cruzi (strain CL Brener) GN=Tc00.1047053511245.140 PE=3 SV=1;>tr|Q4DHY2|Q4DHY2_TRYCC Elongation of fatty acids protein OS=Trypanosoma cruzi (strain CL Brener) GN=Tc00.1047053506661.20	2	9	9	9	35	9	9	9	8	9	9	9	8	9	9	9	8	36.9	36.9	36.9	31.72	279	279;279	1	133	0	206.32	By MS/MS	By MS/MS	By MS/MS	By MS/MS	By MS/MS	By MS/MS	36.9	36.9	36.9	31.2	36.9	34.1	10594000000	1623900000	2790800000	2338300000	2279400000
tr|Q4E4E9|Q4E4E9_TRYCC;tr|Q4CRM9|Q4CRM9_TRYCC	tr|Q4E4E9|Q4E4E9_TRYCC	11;5	11;5	10;5	>tr|Q4E4E9|Q4E4E9_TRYCC Tyrosine aminotransferase, putative OS=Trypanosoma cruzi (strain CL Brener) GN=Tc00.1047053510187.20 PE=4 SV=1	2	11	11	10	35	7	7	11	10	7	7	11	10	7	7	10	9	35.5	35.5	31.4	46146	417	417;215	1	135	0	224.62	By MS/MS	By MS/MS	By MS/MS	By MS/MS	By MS/MS	By MS/MS	23.5	21.6	23.7	27.6	35.5	35.3	13771000000	2367900000	3345300000	1872000000	3344500000
tr|Q4CSC4|Q4CSC4_TRYCC	tr|Q4CSC4|Q4CSC4_TRYCC	9	9	9	>tr|Q4CSC4|Q4CSC4_TRYCC S-adenosylmethionine synthase OS=Trypanosoma cruzi (strain CL Brener) GN=Tc00.1047053506945.160 PE=3 SV=1	1	9	9	9	35	8	9	9	9	8	9	9	9	8	9	9	9	24.1	24.1	24.1	43494	394	394	1	132	0	66356	By MS/MS	By MS/MS	By MS/MS	By MS/MS	By MS/MS	By MS/MS	22.1	24.1	20.3	24.1	24.1	24.1	13370000000	2113400000	2456100000	2618300000	4078800000
tr|Q4DUF7|Q4DUF7_TRYCC;tr|Q4D8I7|Q4D8I7_TRYCC	tr|Q4DUF7|Q4DUF7_TRYCC;tr|Q4D8I7|Q4D8I7_TRYCC	9;9	9;9	9;9	>tr|Q4DUF7|Q4DUF7_TRYCC Prohibitin, putative OS=Trypanosoma cruzi (strain CL Brener) GN=Tc00.1047053508837.120 PE=4 SV=1;>tr|Q4D8I7|Q4D8I7_TRYCC Prohibitin, putative OS=Trypanosoma cruzi (strain CL Brener) GN=Tc00.1047053511383.50 PE=4 SV=1	2	9	9	9	35	9	9	8	9	9	9	8	9	9	9	8	9	29.4	29.4	29.4	30895	272	272;272	1	108	0	13146	By MS/MS	By MS/MS	By MS/MS	By MS/MS	By MS/MS	By MS/MS	29.4	29.4	29.4	29.4	26.5	29.4	10567000000	1707000000	2894000000	1201600000	2098000000
tr|Q4DD49|Q4DD49_TRYCC	tr|Q4DD49|Q4DD49_TRYCC	10	1	1	>tr|Q4DD49|Q4DD49_TRYCC Nascent polypeptide associated complex subunit, putative OS=Trypanosoma cruzi (strain CL Brener) GN=Tc00.1047053510241.60 PE=4 SV=1	1	10	1	1	35	8	8	9	10	1	1	1	1	1	1	1	1	76.2	6.6	6.6	19576	181	181	1	13	0.00074543	2301	By MS/MS	By MS/MS	By MS/MS	By MS/MS	By MS/MS	By MS/MS	55.2	55.2	47	47	60.8	76.2	4071900000	596830000	780070000	661270000	1221900000
tr|Q4DIE1|Q4DIE1_TRYCC	tr|Q4DIE1|Q4DIE1_TRYCC	12	12	12	>tr|Q4DIE1|Q4DIE1_TRYCC ATP-dependent DEAD/H RNA helicase, putative OS=Trypanosoma cruzi (strain CL Brener) GN=Tc00.1047053506959.30 PE=3 SV=1	1	12	12	12	35	8	9	11	7	8	9	11	7	8	9	11	7	33.5	33.5	33.5	46751	406	406	1	105	0	63948	By MS/MS	By MS/MS	By MS/MS	By MS/MS	By MS/MS	By MS/MS	21.9	27.1	19.5	18.7	31	19.5	11804000000	1835100000	2343200000	2319000000	3053100000
tr|Q4CLI9|Q4CLI9_TRYCC;tr|Q4CKF9|Q4CKF9_TRYCC	tr|Q4CLI9|Q4CLI9_TRYCC	10;2	9;2	7;2	>tr|Q4CLI9|Q4CLI9_TRYCC Retrotransposon hot spot (RHS) protein, putative (Fragment) OS=Trypanosoma cruzi (strain CL Brener) GN=Tc00.1047053506421.10 PE=4 SV=1	2	10	9	7	35	9	7	10	9	8	6	9	8	6	5	7	6	34.2	31.6	24.3	39844	345	345;110	1	112	0	323.31	By MS/MS	By MS/MS	By MS/MS	By MS/MS	By MS/MS	By MS/MS	27.5	18.8	22.9	18.8	34.2	27.5	7436900000	1227200000	1477800000	1260900000	1932800000
tr|Q4DCC6|Q4DCC6_TRYCC	tr|Q4DCC6|Q4DCC6_TRYCC	12	12	3	>tr|Q4DCC6|Q4DCC6_TRYCC RNA-binding protein, putative OS=Trypanosoma cruzi (strain CL Brener) GN=Tc00.1047053508895.60 PE=4 SV=1	1	12	12	3	35	7	6	11	11	7	6	11	11	1	2	3	2	30.9	30.9	12.9	51.61	466	466	1	129	0	134.62	By MS/MS	By MS/MS	By MS/MS	By MS/MS	By MS/MS	By MS/MS	22.1	18.2	16.5	18.2	30.7	29.8	6587500000	1015400000	1279900000	1275700000	2024700000
tr|Q4CN63|Q4CN63_TRYCC;tr|Q4CKN9|Q4CKN9_TRYCC	tr|Q4CN63|Q4CN63_TRYCC	9;2	9;2	4;0	>tr|Q4CN63|Q4CN63_TRYCC Uncharacterized protein OS=Trypanosoma cruzi (strain CL Brener) GN=Tc00.1047053509935.20 PE=4 SV=1	2	9	9	4	35	9	8	9	9	9	8	9	9	4	4	4	4	29.8	29.8	18.3	41571	383	383;149	1	130	0	273.44	By MS/MS	By MS/MS	By MS/MS	By MS/MS	By MS/MS	By MS/MS	29.8	29.5	18.3	29.5	29.8	29.8	5516100000	889240000	1050100000	1149000000	1542900000
tr|Q4DAM7|Q4DAM7_TRYCC;tr|Q4DAM8|Q4DAM8_TRYCC;tr|Q4DMX8|Q4DMX8_TRYCC	tr|Q4DAM7|Q4DAM7_TRYCC	10;4;4	10;4;4	3;2;2	>tr|Q4DAM7|Q4DAM7_TRYCC 3-hydroxyisobutyryl-CoA hydrolase, mitochondrial OS=Trypanosoma cruzi (strain CL Brener) GN=Tc00.1047053506727.100 PE=3 SV=1	3	10	10	3	35	8	9	8	10	8	9	8	10	2	2	1	3	32.8	32.8	9.7	36569	329	329;379;425	1	104	0	22667	By MS/MS	By MS/MS	By MS/MS	By MS/MS	By MS/MS	By MS/MS	25.8	29.2	29.2	23.4	29.2	32.8	3805100000	632930000	905830000	531060000	934330000
tr|Q4DJ68|Q4DJ68_TRYCC	tr|Q4DJ68|Q4DJ68_TRYCC	11	2	2	>tr|Q4DJ68|Q4DJ68_TRYCC Malic enzyme OS=Trypanosoma cruzi (strain CL Brener) GN=Tc00.1047053505183.30 PE=3 SV=1	1	11	2	2	35	8	7	9	11	2	2	1	2	2	2	1	2	25.5	4.4	4.4	62673	565	565	1	42	0	26691	By MS/MS	By MS/MS	By MS/MS	By MS/MS	By MS/MS	By MS/MS	18.2	15	12.9	15	22.3	25.5	4022700000	836160000	937840000	515910000	1110900000
tr|Q4D5K8|Q4D5K8_TRYCC;tr|Q4D132|Q4D132_TRYCC	tr|Q4D5K8|Q4D5K8_TRYCC;tr|Q4D132|Q4D132_TRYCC	10;6	10;6	10;6	>tr|Q4D5K8|Q4D5K8_TRYCC Uncharacterized protein OS=Trypanosoma cruzi (strain CL Brener) GN=Tc00.1047053508839.80 PE=4 SV=1;>tr|Q4D132|Q4D132_TRYCC Uncharacterized protein OS=Trypanosoma cruzi (strain CL Brener) GN=Tc00.1047053511381.50 PE=4 SV=1	2	10	10	10	35	7	9	9	10	7	9	9	10	7	9	9	10	18.4	18.4	18.4	66015	599	599;599	1	98	0	113.88	By MS/MS	By MS/MS	By MS/MS	By MS/MS	By MS/MS	By MS/MS	13	15.4	10.9	8.8	18.2	18.4	4449900000	762120000	955600000	683390000	1125800000
tr|Q4DWC2|Q4DWC2_TRYCC	tr|Q4DWC2|Q4DWC2_TRYCC	12	12	12	>tr|Q4DWC2|Q4DWC2_TRYCC Uncharacterized protein OS=Trypanosoma cruzi (strain CL Brener) GN=Tc00.1047053509733.110 PE=4 SV=1	1	12	12	12	35	9	10	7	9	9	10	7	9	9	10	7	9	38.7	38.7	38.7	59.04	538	538	1	123	0	125.14	By MS/MS	By MS/MS	By MS/MS	By MS/MS	By MS/MS	By MS/MS	29	32.2	33.1	32.2	21	26.8	4305100000	818520000	1085200000	432070000	831100000
tr|Q4E122|Q4E122_TRYCC	tr|Q4E122|Q4E122_TRYCC	12	12	12	>tr|Q4E122|Q4E122_TRYCC 2,3-bisphosphoglycerate-independent phosphoglycerate mutase, putative OS=Trypanosoma cruzi (strain CL Brener) GN=Tc00.1047053506247.330 PE=4 SV=1	1	12	12	12	35	6	7	11	11	6	7	11	11	6	7	11	11	26	26	26	60365	554	554	1	104	0	50135	By MS/MS	By MS/MS	By MS/MS	By MS/MS	By MS/MS	By MS/MS	13.4	18.1	13.4	13.4	26	23.5	3688100000	659290000	703340000	588850000	1133900000
tr|Q4E132|Q4E132_TRYCC	tr|Q4E132|Q4E132_TRYCC	10	10	10	>tr|Q4E132|Q4E132_TRYCC Prolyl oligopeptidase, putative OS=Trypanosoma cruzi (strain CL Brener) GN=Tc00.1047053506247.230 PE=4 SV=1	1	10	10	10	35	8	8	9	10	8	8	9	10	8	8	9	10	17.8	17.8	17.8	78306	697	697	1	132	0	62256	By MS/MS	By MS/MS	By MS/MS	By MS/MS	By MS/MS	By MS/MS	13.3	13.3	11.6	11.6	16.6	17.8	4792700000	767420000	1015500000	634880000	1248600000
tr|Q4D976|Q4D976_TRYCC	tr|Q4D976|Q4D976_TRYCC	11	2	2	>tr|Q4D976|Q4D976_TRYCC ATP-dependent DEAD/H RNA helicase, putative (Fragment) OS=Trypanosoma cruzi (strain CL Brener) GN=Tc00.1047053506691.14 PE=4 SV=1	1	11	2	2	35	6	8	11	10	1	1	2	2	1	1	2	2	21.1	3.7	3.7	89.07	791	791	1	30	0	36294	By MS/MS	By MS/MS	By MS/MS	By MS/MS	By MS/MS	By MS/MS	12.1	14.9	13.9	13.1	21.1	20.1	1998000000	311490000	420460000	261480000	452150000
tr|Q4CVC6|Q4CVC6_TRYCC	tr|Q4CVC6|Q4CVC6_TRYCC	14	14	14	>tr|Q4CVC6|Q4CVC6_TRYCC Uncharacterized protein OS=Trypanosoma cruzi (strain CL Brener) GN=Tc00.1047053506317.10 PE=4 SV=1	1	14	14	14	35	6	9	8	12	6	9	8	12	6	9	8	12	25.4	25.4	25.4	72155	635	635	1	95	0	27381	By MS/MS	By MS/MS	By MS/MS	By MS/MS	By MS/MS	By MS/MS	12	16.2	13.4	16.4	14.3	23.9	1990400000	275310000	384120000	265750000	550420000
tr|Q4CVJ2|Q4CVJ2_TRYCC	tr|Q4CVJ2|Q4CVJ2_TRYCC	13	13	5	>tr|Q4CVJ2|Q4CVJ2_TRYCC Uncharacterized protein OS=Trypanosoma cruzi (strain CL Brener) GN=Tc00.1047053504199.10 PE=4 SV=1	1	13	13	5	35	6	6	11	12	6	6	11	12	0	0	4	4	20.3	20.3	9.1	103.46	925	925	1	100	0	38314	By MS/MS	By MS/MS	By MS/MS	By MS/MS	By MS/MS	By MS/MS	7.7	7.9	8.6	15.7	17.9	18.6	2799700000	461470000	484550000	459670000	612820000
tr|Q4DGD9|Q4DGD9_TRYCC	tr|Q4DGD9|Q4DGD9_TRYCC	12	12	3	>tr|Q4DGD9|Q4DGD9_TRYCC Uncharacterized protein OS=Trypanosoma cruzi (strain CL Brener) GN=Tc00.1047053503999.30 PE=4 SV=1	1	12	12	3	35	7	7	11	10	7	7	11	10	1	1	3	3	12.5	12.5	3.3	151.71	1380	1380	1	84	0	77686	By MS/MS	By MS/MS	By MS/MS	By MS/MS	By MS/MS	By MS/MS	7.3	7	4.4	7.2	11.8	11	2038000000	317470000	352600000	470740000	469590000
tr|Q4DZZ4|Q4DZZ4_TRYCC	tr|Q4DZZ4|Q4DZZ4_TRYCC	13	3	3	>tr|Q4DZZ4|Q4DZZ4_TRYCC Prolyl-tRNA synthetase, putative OS=Trypanosoma cruzi (strain CL Brener) GN=Tc00.1047053509805.130 PE=3 SV=1	1	13	3	3	35	7	6	10	12	2	2	3	3	2	2	3	3	22.1	6	6	91266	810	810	1	21	0	49672	By matching	By MS/MS	By MS/MS	By MS/MS	By matching	By MS/MS	11.7	9.9	11.7	10.2	17.5	21.1	388510000	78432000	44606000	54820000	160120000
tr|Q4DP43|Q4DP43_TRYCC	tr|Q4DP43|Q4DP43_TRYCC	14	2	2	>tr|Q4DP43|Q4DP43_TRYCC Uncharacterized protein OS=Trypanosoma cruzi (strain CL Brener) GN=Tc00.1047053510885.160 PE=4 SV=1	1	14	2	2	35	6	9	11	9	1	1	2	2	1	1	2	2	11.9	2	2	160.92	1420	1420	1	18	0	21609	By matching	By MS/MS	By MS/MS	By MS/MS	By MS/MS	By MS/MS	5.5	7.5	6.1	8.2	9.6	8	367690000	49584000	86342000	13638000	168840000
tr|Q4CW01|Q4CW01_TRYCC	tr|Q4CW01|Q4CW01_TRYCC	12	1	1	>tr|Q4CW01|Q4CW01_TRYCC Calpain-like cysteine peptidase, putative (Fragment) OS=Trypanosoma cruzi (strain CL Brener) GN=Tc00.1047053509013.19 PE=3 SV=1	1	12	1	1	35	7	7	9	12	0	0	1	1	0	0	1	1	17.3	2.4	2.4	135.5	1194	1194	1	3	0.0021529	20899	By matching	By matching	By matching	By matching	By MS/MS	By matching	9.3	9.3	9.3	9.3	14.1	17.3	96272000	0	0	64291000	31980000
tr|Q4D9L7|Q4D9L7_TRYCC	tr|Q4D9L7|Q4D9L7_TRYCC	10	10	1	>tr|Q4D9L7|Q4D9L7_TRYCC Nascent polypeptide associated complex subunit, putative OS=Trypanosoma cruzi (strain CL Brener) GN=Tc00.1047053510579.70 PE=4 SV=1	1	10	10	1	34	8	7	9	10	8	7	9	10	1	0	1	1	76.2	76.2	6.6	19566	181	181	1	139	0	323.31	By MS/MS	By MS/MS	By MS/MS	By MS/MS	By MS/MS	By MS/MS	55.2	48.6	47	40.3	60.8	76.2	35068000000	5685200000	5765700000	6085700000	10017000000
tr|Q4DTN2|Q4DTN2_TRYCC	tr|Q4DTN2|Q4DTN2_TRYCC	11	11	11	>tr|Q4DTN2|Q4DTN2_TRYCC Activated protein kinase C receptor, putative OS=Trypanosoma cruzi (strain CL Brener) GN=Tc00.1047053511211.120 PE=4 SV=1	1	11	11	11	34	7	8	9	10	7	8	9	10	7	8	9	10	44.3	44.3	44.3	35031	318	318	1	149	0	212	By MS/MS	By MS/MS	By MS/MS	By MS/MS	By MS/MS	By MS/MS	26.1	25.8	22.3	19.5	28.6	44.3	36127000000	4787300000	7343700000	7409900000	10825000000
tr|Q4DQB0|Q4DQB0_TRYCC	tr|Q4DQB0|Q4DQB0_TRYCC	9	9	3	>tr|Q4DQB0|Q4DQB0_TRYCC Cysteine peptidase C (CPC), putative OS=Trypanosoma cruzi (strain CL Brener) GN=Tc00.1047053511827.100 PE=3 SV=1	1	9	9	3	34	8	9	9	8	8	9	9	8	3	3	3	3	32.4	32.4	9	36.71	333	333	1	125	0	109.15	By MS/MS	By MS/MS	By MS/MS	By MS/MS	By MS/MS	By MS/MS	26.4	32.4	24.3	26.1	32.4	26.4	17170000000	3089700000	4034200000	2179000000	3478900000
tr|Q4E0J7|Q4E0J7_TRYCC;tr|Q4E0J6|Q4E0J6_TRYCC;tr|Q4CQ35|Q4CQ35_TRYCC	tr|Q4E0J7|Q4E0J7_TRYCC;tr|Q4E0J6|Q4E0J6_TRYCC	9;5;2	9;5;2	3;1;1	>tr|Q4E0J7|Q4E0J7_TRYCC Cysteine peptidase, putative OS=Trypanosoma cruzi (strain CL Brener) GN=Tc00.1047053509429.320 PE=3 SV=1;>tr|Q4E0J6|Q4E0J6_TRYCC Cruzipain, putative (Fragment) OS=Trypanosoma cruzi (strain CL Brener) GN=Tc00.1047053509429.329 PE=3 S	3	9	9	3	34	8	9	8	9	8	9	8	9	3	3	3	3	25.5	25.5	9.4	49781	467	467;174;247	1	199	0	103.53	By MS/MS	By MS/MS	By MS/MS	By MS/MS	By MS/MS	By MS/MS	23.8	25.5	25.5	25.5	23.8	25.5	11955000000	1913700000	2992500000	1360700000	3011300000
tr|Q4CWK5|Q4CWK5_TRYCC	tr|Q4CWK5|Q4CWK5_TRYCC	9	9	1	>tr|Q4CWK5|Q4CWK5_TRYCC DNAK protein, putative (Fragment) OS=Trypanosoma cruzi (strain CL Brener) GN=Tc00.1047053509543.50 PE=4 SV=1	1	9	9	1	34	7	9	9	9	7	9	9	9	1	1	1	1	52.2	52.2	6.8	27147	249	249	1	149	0	163.39	By MS/MS	By MS/MS	By MS/MS	By MS/MS	By MS/MS	By MS/MS	37.3	52.2	36.9	37.3	52.2	52.2	13941000000	1860400000	3096500000	2285000000	4016200000
tr|Q4DSA7|Q4DSA7_TRYCC	tr|Q4DSA7|Q4DSA7_TRYCC	10	10	2	>tr|Q4DSA7|Q4DSA7_TRYCC Nucleosome assembly protein, putative OS=Trypanosoma cruzi (strain CL Brener) GN=Tc00.1047053507031.29 PE=3 SV=1	1	10	10	2	34	8	7	10	9	8	7	10	9	2	1	2	2	32.3	32.3	8.6	41078	362	362	1	112	0	133.33	By MS/MS	By MS/MS	By MS/MS	By MS/MS	By MS/MS	By MS/MS	26.2	21.3	16.3	23.2	32.3	28.7	13320000000	1780200000	2919400000	2616400000	4244700000
tr|Q4CUC8|Q4CUC8_TRYCC;tr|Q4CUC7|Q4CUC7_TRYCC	tr|Q4CUC8|Q4CUC8_TRYCC;tr|Q4CUC7|Q4CUC7_TRYCC	9;9	9;9	9;9	>tr|Q4CUC8|Q4CUC8_TRYCC 40S ribosomal protein S7 OS=Trypanosoma cruzi (strain CL Brener) GN=Tc00.1047053506593.19 PE=3 SV=1;>tr|Q4CUC7|Q4CUC7_TRYCC 40S ribosomal protein S7 OS=Trypanosoma cruzi (strain CL Brener) GN=Tc00.1047053506593.30 PE=3 SV=1	2	9	9	9	34	8	8	9	9	8	8	9	9	8	8	9	9	43.1	43.1	43.1	23914	202	202;211	1	149	0	42.42	By MS/MS	By MS/MS	By MS/MS	By MS/MS	By MS/MS	By MS/MS	42.1	42.1	37.6	37.6	43.1	43.1	14261000000	1354500000	2271900000	3115700000	4872000000
tr|Q4CR18|Q4CR18_TRYCC	tr|Q4CR18|Q4CR18_TRYCC	12	12	12	>tr|Q4CR18|Q4CR18_TRYCC Glutamate dehydrogenase, putative (Fragment) OS=Trypanosoma cruzi (strain CL Brener) GN=Tc00.1047053509445.39 PE=4 SV=1	1	12	12	12	34	6	8	11	9	6	8	11	9	6	8	11	9	34.5	34.5	34.5	43276	383	383	1	91	0	29636	By MS/MS	By MS/MS	By MS/MS	By MS/MS	By MS/MS	By MS/MS	17.2	20.9	23.8	25.1	31.9	24	15994000000	2011400000	3550400000	2397300000	4586200000
tr|Q4E134|Q4E134_TRYCC	tr|Q4E134|Q4E134_TRYCC	10	10	10	>tr|Q4E134|Q4E134_TRYCC Uncharacterized protein OS=Trypanosoma cruzi (strain CL Brener) GN=Tc00.1047053506247.210 PE=4 SV=1	1	10	10	10	34	8	8	8	10	8	8	8	10	8	8	8	10	49	49	49	28626	255	255	1	123	0	190.05	By MS/MS	By MS/MS	By MS/MS	By MS/MS	By MS/MS	By MS/MS	37.6	37.6	30.6	25.1	43.1	49	9255400000	1642200000	2053300000	1595700000	2637900000
tr|Q4CNZ3|Q4CNZ3_TRYCC	tr|Q4CNZ3|Q4CNZ3_TRYCC	9	9	4	>tr|Q4CNZ3|Q4CNZ3_TRYCC Uncharacterized protein OS=Trypanosoma cruzi (strain CL Brener) GN=Tc00.1047053507769.30 PE=4 SV=1	1	9	9	4	34	8	8	9	9	8	8	9	9	3	3	4	4	39	39	23.7	26549	236	236	1	108	0	21728	By MS/MS	By MS/MS	By MS/MS	By MS/MS	By MS/MS	By MS/MS	28.8	28.8	25.4	28.8	39	39	8225300000	1195000000	1746700000	1438000000	2090400000
tr|Q4D7C3|Q4D7C3_TRYCC;tr|Q4CXV1|Q4CXV1_TRYCC	tr|Q4D7C3|Q4D7C3_TRYCC;tr|Q4CXV1|Q4CXV1_TRYCC	9;9	9;9	9;9	>tr|Q4D7C3|Q4D7C3_TRYCC Peptidyl-prolyl cis-trans isomerase OS=Trypanosoma cruzi (strain CL Brener) GN=Tc00.1047053511237.110 PE=3 SV=1;>tr|Q4CXV1|Q4CXV1_TRYCC Peptidyl-prolyl cis-trans isomerase OS=Trypanosoma cruzi (strain CL Brener) GN=Tc00.104705350641	2	9	9	9	34	8	8	9	9	8	8	9	9	8	8	9	9	52.7	52.7	52.7	24161	224	224;224	1	104	0	61217	By MS/MS	By MS/MS	By MS/MS	By MS/MS	By MS/MS	By MS/MS	46.4	46.4	52.7	52.7	52.7	52.7	6047400000	1065100000	1167300000	845080000	1388300000
tr|Q4DRQ2|Q4DRQ2_TRYCC	tr|Q4DRQ2|Q4DRQ2_TRYCC	10	10	2	>tr|Q4DRQ2|Q4DRQ2_TRYCC Protein phosphatase 2C, putative OS=Trypanosoma cruzi (strain CL Brener) GN=Tc00.1047053506739.200 PE=4 SV=1	1	10	10	2	34	8	7	10	9	8	7	10	9	1	1	2	2	36.6	36.6	7.2	46227	415	415	1	118	0	89822	By MS/MS	By MS/MS	By MS/MS	By MS/MS	By MS/MS	By MS/MS	26.3	22.7	22.7	19.3	36.6	33	6051000000	1060400000	1192400000	970610000	1845900000
tr|Q4DSV5|Q4DSV5_TRYCC	tr|Q4DSV5|Q4DSV5_TRYCC	11	11	11	>tr|Q4DSV5|Q4DSV5_TRYCC Protein kinase A regulatory subunit, putative OS=Trypanosoma cruzi (strain CL Brener) GN=Tc00.1047053506227.150 PE=4 SV=1	1	11	11	11	34	7	8	10	9	7	8	10	9	7	8	10	9	30.6	30.6	30.6	56752	503	503	1	124	0	141.75	By MS/MS	By MS/MS	By MS/MS	By MS/MS	By MS/MS	By MS/MS	20.3	22.7	22.7	20.3	27.8	25.4	6402900000	1108600000	1849400000	745680000	1239400000
tr|Q4E1S6|Q4E1S6_TRYCC;tr|Q4D6Z4|Q4D6Z4_TRYCC	tr|Q4E1S6|Q4E1S6_TRYCC;tr|Q4D6Z4|Q4D6Z4_TRYCC	10;9	10;9	10;9	>tr|Q4E1S6|Q4E1S6_TRYCC Adenylate kinase, putative OS=Trypanosoma cruzi (strain CL Brener) GN=Tc00.1047053506855.180 PE=3 SV=1;>tr|Q4D6Z4|Q4D6Z4_TRYCC Adenylate kinase, putative OS=Trypanosoma cruzi (strain CL Brener) GN=Tc00.1047053503479.30 PE=3 SV=1	2	10	10	10	34	8	7	10	9	8	7	10	9	8	7	10	9	38.5	38.5	38.5	29392	260	260;260	1	90	0	20847	By MS/MS	By MS/MS	By MS/MS	By MS/MS	By MS/MS	By MS/MS	32.3	28.1	28.8	24.2	38.5	35.8	3211100000	470880000	959580000	319980000	1036200000
tr|Q4DEF3|Q4DEF3_TRYCC;tr|Q4CSB2|Q4CSB2_TRYCC	tr|Q4DEF3|Q4DEF3_TRYCC;tr|Q4CSB2|Q4CSB2_TRYCC	11;10	2;2	2;2	>tr|Q4DEF3|Q4DEF3_TRYCC NADP-dependent alcohol hydrogenase, putative OS=Trypanosoma cruzi (strain CL Brener) GN=Tc00.1047053508677.80 PE=3 SV=1;>tr|Q4CSB2|Q4CSB2_TRYCC NADP-dependent alcohol hydrogenase, putative (Fragment) OS=Trypanosoma cruzi (strain CL	2	11	2	2	34	7	7	10	10	2	2	2	2	2	2	2	2	41.6	9.4	9.4	37467	351	351;347	1	35	0	44265	By MS/MS	By MS/MS	By MS/MS	By MS/MS	By MS/MS	By MS/MS	24.5	29.1	26.2	23.1	38.7	35.6	3278100000	362630000	564050000	661110000	1390800000
tr|Q4CM66|Q4CM66_TRYCC	tr|Q4CM66|Q4CM66_TRYCC	9	9	6	>tr|Q4CM66|Q4CM66_TRYCC Uncharacterized protein OS=Trypanosoma cruzi (strain CL Brener) GN=Tc00.1047053509651.10 PE=4 SV=1	1	9	9	6	34	8	8	9	9	8	8	9	9	5	5	6	6	27.6	27.6	20.1	48.13	427	427	1	102	0	89077	By MS/MS	By MS/MS	By MS/MS	By MS/MS	By MS/MS	By MS/MS	23.9	23.9	18	18	27.6	27.6	4260300000	738640000	842670000	432480000	900510000
tr|Q4D9J1|Q4D9J1_TRYCC	tr|Q4D9J1|Q4D9J1_TRYCC	10	10	10	>tr|Q4D9J1|Q4D9J1_TRYCC Proteasome regulatory ATPase subunit 1, putative OS=Trypanosoma cruzi (strain CL Brener) GN=Tc00.1047053506857.90 PE=3 SV=1	1	10	10	10	34	7	7	10	10	7	7	10	10	7	7	10	10	27.7	27.7	27.7	48549	437	437	1	98	0	15364	By MS/MS	By MS/MS	By MS/MS	By MS/MS	By MS/MS	By MS/MS	14.4	16.5	14.4	19.5	27.7	27.7	3846300000	561710000	754800000	593750000	1142700000
tr|Q4DCB6|Q4DCB6_TRYCC;tr|Q4CR96|Q4CR96_TRYCC	tr|Q4DCB6|Q4DCB6_TRYCC	11;1	11;1	11;1	>tr|Q4DCB6|Q4DCB6_TRYCC Ribonucleoside-diphosphate reductase OS=Trypanosoma cruzi (strain CL Brener) GN=Tc00.1047053506933.20 PE=3 SV=1	2	11	11	11	34	7	8	9	10	7	8	9	10	7	8	9	10	19.6	19.6	19.6	90666	796	796;236	1	93	0	44516	By MS/MS	By MS/MS	By MS/MS	By MS/MS	By MS/MS	By MS/MS	10.4	11.6	4.5	6.2	15.7	17	4577700000	670770000	1054500000	783860000	1436000000
tr|Q4DLK5|Q4DLK5_TRYCC	tr|Q4DLK5|Q4DLK5_TRYCC	13	13	3	>tr|Q4DLK5|Q4DLK5_TRYCC Prolyl-tRNA synthetase, putative OS=Trypanosoma cruzi (strain CL Brener) GN=Tc00.1047053503939.80 PE=3 SV=1	1	13	13	3	34	6	6	10	12	6	6	10	12	1	2	3	3	21.7	21.7	5.7	91348	810	810	1	107	0	82164	By MS/MS	By MS/MS	By MS/MS	By MS/MS	By MS/MS	By MS/MS	10.2	9.9	10.2	12.7	17.2	20.7	5013800000	508540000	863990000	815740000	1841700000
tr|Q4DZQ8|Q4DZQ8_TRYCC	tr|Q4DZQ8|Q4DZQ8_TRYCC	12	12	6	>tr|Q4DZQ8|Q4DZQ8_TRYCC Uncharacterized protein OS=Trypanosoma cruzi (strain CL Brener) GN=Tc00.1047053507711.200 PE=4 SV=1	1	12	12	6	34	6	6	10	12	6	6	10	12	3	3	4	6	12.4	12.4	6.9	168.08	1546	1546	1	79	0	78794	By MS/MS	By MS/MS	By MS/MS	By MS/MS	By MS/MS	By MS/MS	5.1	5.2	4.3	3.4	9.4	12.4	3012100000	422730000	381600000	659780000	1077300000
tr|Q4DKP3|Q4DKP3_TRYCC	tr|Q4DKP3|Q4DKP3_TRYCC	11	2	2	>tr|Q4DKP3|Q4DKP3_TRYCC Uncharacterized protein OS=Trypanosoma cruzi (strain CL Brener) GN=Tc00.1047053503897.20 PE=4 SV=1	1	11	2	2	34	9	8	8	9	2	2	2	2	2	2	2	2	12.1	3.4	3.4	129.79	1201	1201	1	38	0	68.6	By MS/MS	By MS/MS	By MS/MS	By MS/MS	By MS/MS	By MS/MS	9.7	9.7	8.4	8.4	8.7	10.9	1018100000	187750000	175990000	161080000	258040000
tr|Q4D001|Q4D001_TRYCC	tr|Q4D001|Q4D001_TRYCC	9	1	1	>tr|Q4D001|Q4D001_TRYCC Uncharacterized protein OS=Trypanosoma cruzi (strain CL Brener) GN=Tc00.1047053509505.40 PE=4 SV=1	1	9	1	1	34	8	9	9	8	1	1	1	1	1	1	1	1	36.4	2.5	2.5	39894	357	357	1	11	0.003465	1858	By MS/MS	By MS/MS	By MS/MS	By MS/MS	By MS/MS	By MS/MS	31.1	36.4	31.1	31.1	36.4	31.1	293770000	45421000	67219000	43215000	86058000
tr|Q4DWB1|Q4DWB1_TRYCC	tr|Q4DWB1|Q4DWB1_TRYCC	10	2	1	>tr|Q4DWB1|Q4DWB1_TRYCC Retrotransposon hot spot (RHS) protein, putative OS=Trypanosoma cruzi (strain CL Brener) GN=Tc00.1047053505997.60 PE=4 SV=1	1	10	2	1	34	8	8	10	8	2	2	2	2	1	1	1	1	14.4	2.9	1.3	88471	771	771	1	20	0	10295	By MS/MS	By MS/MS	By MS/MS	By MS/MS	By MS/MS	By MS/MS	11	11	8.4	8.4	14.4	11.7	402980000	62921000	90509000	54274000	82347000
tr|Q4CKX3|Q4CKX3_TRYCC	tr|Q4CKX3|Q4CKX3_TRYCC	12	1	1	>tr|Q4CKX3|Q4CKX3_TRYCC Clathrin heavy chain, putative (Fragment) OS=Trypanosoma cruzi (strain CL Brener) GN=Tc00.1047053481435.9 PE=4 SV=1	1	12	1	1	34	7	5	11	11	1	1	1	1	1	1	1	1	29.8	2.5	2.5	59302	516	516	1	9	0	45909	By MS/MS	By MS/MS	By matching	By matching	By MS/MS	By MS/MS	14.1	11.8	9.3	10.9	25.2	28.1	274500000	34502000	77146000	110190000	46519000
tr|Q4E0Y6|Q4E0Y6_TRYCC	tr|Q4E0Y6|Q4E0Y6_TRYCC	13	2	0	>tr|Q4E0Y6|Q4E0Y6_TRYCC Phosphodiesterase OS=Trypanosoma cruzi (strain CL Brener) GN=Tc00.1047053508277.100 PE=3 SV=1	1	13	2	0	34	6	6	11	11	0	0	1	2	0	0	0	0	20.3	4.2	0	102.51	918	918	1	5	0	3173	By matching	By matching	By matching	By matching	By MS/MS	By MS/MS	7.3	7.3	5.7	6.3	16.9	15.6	157280000	0	0	51510000	105770000
tr|Q4CS05|Q4CS05_TRYCC;tr|Q4CTX2|Q4CTX2_TRYCC;tr|Q4DRI4|Q4DRI4_TRYCC	tr|Q4CS05|Q4CS05_TRYCC;tr|Q4CTX2|Q4CTX2_TRYCC;tr|Q4DRI4|Q4DRI4_TRYCC	9;7;6	9;7;6	2;2;0	>tr|Q4CS05|Q4CS05_TRYCC Flagellar calcium-binding protein, putative OS=Trypanosoma cruzi (strain CL Brener) GN=Tc00.1047053506749.20 PE=4 SV=1;>tr|Q4CTX2|Q4CTX2_TRYCC Flagellar calcium-binding protein, putative OS=Trypanosoma cruzi (strain CL Brener) GN=Tc	3	9	9	2	33	9	8	8	8	9	8	8	8	2	2	2	2	43.1	43.1	6.6	23819	211	211;211;181	1	311	0	140.15	By MS/MS	By MS/MS	By MS/MS	By MS/MS	By MS/MS	By MS/MS	43.1	39.3	43.1	43.1	39.8	39.8	80417000000	15806000000	17657000000	9394400000	12651000000
tr|Q4DPV7|Q4DPV7_TRYCC;tr|Q4DPV6|Q4DPV6_TRYCC	tr|Q4DPV7|Q4DPV7_TRYCC;tr|Q4DPV6|Q4DPV6_TRYCC	10;9	10;9	10;9	>tr|Q4DPV7|Q4DPV7_TRYCC Uncharacterized protein OS=Trypanosoma cruzi (strain CL Brener) GN=Tc00.1047053510877.30 PE=4 SV=1;>tr|Q4DPV6|Q4DPV6_TRYCC Uncharacterized protein OS=Trypanosoma cruzi (strain CL Brener) GN=Tc00.1047053510877.40 PE=4 SV=1	2	10	10	10	33	7	7	9	10	7	7	9	10	7	7	9	10	47	47	47	25108	230	230;226	1	149	0	175.83	By MS/MS	By MS/MS	By MS/MS	By MS/MS	By MS/MS	By MS/MS	23	23	27.4	23	42.6	47	32452000000	5607900000	5217600000	5521300000	8942300000
tr|Q4DG13|Q4DG13_TRYCC	tr|Q4DG13|Q4DG13_TRYCC	9	9	4	>tr|Q4DG13|Q4DG13_TRYCC p22 protein, putative OS=Trypanosoma cruzi (strain CL Brener) GN=Tc00.1047053509053.70 PE=4 SV=1	1	9	9	4	33	8	9	8	8	8	9	8	8	4	4	3	4	32.9	32.9	10.2	25845	225	225	1	106	0	164.58	By MS/MS	By MS/MS	By MS/MS	By MS/MS	By MS/MS	By MS/MS	25.3	32.9	25.3	25.3	32.9	29.8	11812000000	2333800000	2243200000	1435800000	2468400000
tr|Q4DRI5|Q4DRI5_TRYCC;tr|Q4D1Q2|Q4D1Q2_TRYCC;tr|Q4CTX1|Q4CTX1_TRYCC;tr|Q4CTX0|Q4CTX0_TRYCC;tr|Q4CS04|Q4CS04_TRYCC;tr|Q4CTW9|Q4CTW9_TRYCC	tr|Q4DRI5|Q4DRI5_TRYCC;tr|Q4D1Q2|Q4D1Q2_TRYCC;tr|Q4CTX1|Q4CTX1_TRYCC;tr|Q4CTX0|Q4CTX0_TRYCC;tr|Q4CS04|Q4CS04_TRYCC;tr|Q4CTW9|Q4CTW9_TRYCC	9;9;9;9;6;5	2;2;2;2;2;2	2;2;2;2;2;2	>tr|Q4DRI5|Q4DRI5_TRYCC Flagellar calcium-binding protein, putative OS=Trypanosoma cruzi (strain CL Brener) GN=Tc00.1047053507491.151 PE=4 SV=1;>tr|Q4D1Q2|Q4D1Q2_TRYCC Calcium-binding protein, putative OS=Trypanosoma cruzi (strain CL Brener) GN=Tc00.104705	6	9	2	2	33	9	8	8	8	2	2	2	2	2	2	2	2	45	17.5	17.5	23727	211	211;211;211;211;108;79	1	60	0	12027	By MS/MS	By MS/MS	By MS/MS	By MS/MS	By MS/MS	By MS/MS	45	41.2	45	45	41.7	41.7	5704300000	1227800000	838730000	681190000	530940000
tr|Q4E5H8|Q4E5H8_TRYCC;tr|Q4DB28|Q4DB28_TRYCC;tr|Q4DN74|Q4DN74_TRYCC	tr|Q4E5H8|Q4E5H8_TRYCC;tr|Q4DB28|Q4DB28_TRYCC;tr|Q4DN74|Q4DN74_TRYCC	10;10;6	10;10;6	10;10;6	>tr|Q4E5H8|Q4E5H8_TRYCC Ribosomal protein OS=Trypanosoma cruzi (strain CL Brener) GN=Tc00.1047053511277.160 PE=3 SV=1;>tr|Q4DB28|Q4DB28_TRYCC Ribosomal protein OS=Trypanosoma cruzi (strain CL Brener) GN=Tc00.1047053506963.10 PE=3 SV=1;>tr|Q4DN74|Q4DN74_TRY	3	10	10	10	33	6	7	10	10	6	7	10	10	6	7	10	10	45.8	45.8	45.8	24556	214	214;220;106	1	100	0	143.1	By MS/MS	By MS/MS	By MS/MS	By MS/MS	By MS/MS	By MS/MS	20.6	24.8	6.5	17.8	45.8	45.8	10903000000	962600000	1668000000	2269800000	4705900000
tr|Q4D714|Q4D714_TRYCC	tr|Q4D714|Q4D714_TRYCC	12	12	3	>tr|Q4D714|Q4D714_TRYCC High mobility group protein, putative OS=Trypanosoma cruzi (strain CL Brener) GN=Tc00.1047053504431.64 PE=4 SV=1	1	12	12	3	33	7	6	11	9	7	6	11	9	0	0	2	1	38.9	38.9	9.6	30713	270	270	1	117	0	59.17	By MS/MS	By MS/MS	By MS/MS	By MS/MS	By MS/MS	By MS/MS	21.1	18.1	30.7	23.7	35.2	29.6	12901000000	1707800000	2455300000	2156000000	3930600000
tr|Q4CM92|Q4CM92_TRYCC	tr|Q4CM92|Q4CM92_TRYCC	10	10	2	>tr|Q4CM92|Q4CM92_TRYCC Uncharacterized protein OS=Trypanosoma cruzi (strain CL Brener) GN=Tc00.1047053508955.20 PE=4 SV=1	1	10	10	2	33	6	7	10	10	6	7	10	10	1	1	2	2	43.6	43.6	9	26658	234	234	1	87	0	15451	By MS/MS	By MS/MS	By MS/MS	By MS/MS	By MS/MS	By MS/MS	23.1	29.5	19.2	23.5	43.6	43.6	6773800000	932060000	1870500000	934600000	2134000000
tr|Q4D7V2|Q4D7V2_TRYCC	tr|Q4D7V2|Q4D7V2_TRYCC	9	8	8	>tr|Q4D7V2|Q4D7V2_TRYCC Acetylornithine deacetylase-like, putative OS=Trypanosoma cruzi (strain CL Brener) GN=Tc00.1047053508971.40 PE=4 SV=1	1	9	8	8	33	8	8	9	8	7	7	8	7	7	7	8	7	29.9	27.1	27.1	43151	395	395	1	95	0	118.09	By MS/MS	By MS/MS	By MS/MS	By MS/MS	By MS/MS	By MS/MS	28.1	28.1	26.6	26.6	29.9	28.1	6710300000	903550000	1560500000	738810000	1674200000
tr|Q4E650|Q4E650_TRYCC	tr|Q4E650|Q4E650_TRYCC	11	11	11	>tr|Q4E650|Q4E650_TRYCC Serine/threonine protein kinase, putative OS=Trypanosoma cruzi (strain CL Brener) GN=Tc00.1047053508153.400 PE=3 SV=1	1	11	11	11	33	5	6	11	11	5	6	11	11	5	6	11	11	41.2	41.2	41.2	56331	500	500	1	110	0	112.1	By MS/MS	By MS/MS	By MS/MS	By MS/MS	By MS/MS	By MS/MS	13.2	15.8	15.8	15.8	41.2	41.2	7007000000	1094700000	1523400000	1025700000	1459000000
tr|Q4DM82|Q4DM82_TRYCC	tr|Q4DM82|Q4DM82_TRYCC	11	11	2	>tr|Q4DM82|Q4DM82_TRYCC Inosine-5-monophosphate dehydrogenase OS=Trypanosoma cruzi (strain CL Brener) GN=Tc00.1047053511301.110 PE=3 SV=1	1	11	11	2	33	5	7	10	11	5	7	10	11	1	1	2	2	27	27	7	55582	512	512	1	99	0	60046	By MS/MS	By MS/MS	By MS/MS	By MS/MS	By MS/MS	By MS/MS	12.1	18.2	12.1	12.1	26.8	27	7454000000	1003300000	1747400000	1040900000	2733000000
tr|Q4CY35|Q4CY35_TRYCC	tr|Q4CY35|Q4CY35_TRYCC	9	9	2	>tr|Q4CY35|Q4CY35_TRYCC Uncharacterized protein OS=Trypanosoma cruzi (strain CL Brener) GN=Tc00.1047053503971.50 PE=4 SV=1	1	9	9	2	33	8	8	8	9	8	8	8	9	2	2	2	2	26.2	26.2	6.6	43098	351	351	1	89	0	17969	By MS/MS	By MS/MS	By MS/MS	By MS/MS	By MS/MS	By MS/MS	22.5	23.4	14	14	23.1	26.2	5242900000	749340000	899060000	628920000	1237700000
tr|Q4DLU9|Q4DLU9_TRYCC;tr|Q4D820|Q4D820_TRYCC	tr|Q4DLU9|Q4DLU9_TRYCC;tr|Q4D820|Q4D820_TRYCC	9;9	9;9	9;9	>tr|Q4DLU9|Q4DLU9_TRYCC Chaperone DnaJ protein, putative OS=Trypanosoma cruzi (strain CL Brener) GN=Tc00.1047053510575.200 PE=3 SV=1;>tr|Q4D820|Q4D820_TRYCC Chaperone DnaJ protein, putative OS=Trypanosoma cruzi (strain CL Brener) GN=Tc00.1047053510243.30 P	2	9	9	9	33	7	8	9	9	7	8	9	9	7	8	9	9	20.4	20.4	20.4	50223	465	465;465	1	77	0	18358	By MS/MS	By MS/MS	By MS/MS	By MS/MS	By MS/MS	By MS/MS	18.3	20.4	9.7	11	20.4	20.4	5000100000	784010000	1137300000	808960000	1372000000
tr|Q4DW56|Q4DW56_TRYCC	tr|Q4DW56|Q4DW56_TRYCC	10	10	2	>tr|Q4DW56|Q4DW56_TRYCC ABC transporter, putative OS=Trypanosoma cruzi (strain CL Brener) GN=Tc00.1047053508231.190 PE=4 SV=1	1	10	10	2	33	7	8	9	9	7	8	9	9	1	2	2	2	21.4	21.4	4.1	74605	665	665	1	101	0	284.74	By MS/MS	By MS/MS	By MS/MS	By MS/MS	By MS/MS	By MS/MS	16.7	17.9	17.9	15.6	20	19.2	7657300000	1161400000	1750500000	1258300000	1896300000
tr|Q4DN94|Q4DN94_TRYCC;tr|Q4CSN9|Q4CSN9_TRYCC;tr|Q4CN82|Q4CN82_TRYCC;tr|Q4CQE5|Q4CQE5_TRYCC;tr|Q4DN96|Q4DN96_TRYCC;tr|Q4CN81|Q4CN81_TRYCC;tr|Q4CSN8|Q4CSN8_TRYCC;tr|Q4CSC8|Q4CSC8_TRYCC;tr|Q4DX87|Q4DX87_TRYCC	tr|Q4DN94|Q4DN94_TRYCC;tr|Q4CSN9|Q4CSN9_TRYCC;tr|Q4CN82|Q4CN82_TRYCC;tr|Q4CQE5|Q4CQE5_TRYCC;tr|Q4DN96|Q4DN96_TRYCC	10;9;8;8;6;3;2;1;1	10;9;8;8;6;3;2;1;1	1;1;1;0;0;0;0;0;0	>tr|Q4DN94|Q4DN94_TRYCC Casein kinase, putative OS=Trypanosoma cruzi (strain CL Brener) GN=Tc00.1047053508541.230 PE=3 SV=1;>tr|Q4CSN9|Q4CSN9_TRYCC Casein kinase, putative OS=Trypanosoma cruzi (strain CL Brener) GN=Tc00.1047053507541.40 PE=3 SV=1;>tr|Q4CN8	9	10	10	1	33	7	7	9	10	7	7	9	10	1	0	1	1	33.6	33.6	3.3	38115	330	330;330;330;330;283;90;122;172;385	1	83	0	52301	By MS/MS	By MS/MS	By MS/MS	By MS/MS	By MS/MS	By MS/MS	23	22.1	18.8	16.4	29.7	33.6	4066100000	520390000	776700000	799450000	1455600000
tr|Q4DMJ3|Q4DMJ3_TRYCC;tr|Q4D2Y7|Q4D2Y7_TRYCC	tr|Q4DMJ3|Q4DMJ3_TRYCC	11;1	11;1	11;1	>tr|Q4DMJ3|Q4DMJ3_TRYCC Serine/threonine-protein phosphatase OS=Trypanosoma cruzi (strain CL Brener) GN=Tc00.1047053508815.110 PE=3 SV=1	2	11	11	11	33	7	6	11	9	7	6	11	9	7	6	11	9	48.5	48.5	48.5	34416	303	303;351	1	80	0	65236	By MS/MS	By MS/MS	By MS/MS	By MS/MS	By MS/MS	By MS/MS	34.7	31.7	31	25.1	48.5	43.9	2588000000	396510000	390710000	519940000	793390000
tr|Q4CYA6|Q4CYA6_TRYCC	tr|Q4CYA6|Q4CYA6_TRYCC	10	10	1	>tr|Q4CYA6|Q4CYA6_TRYCC Proteasome regulatory non-ATPase subunit 8, putative OS=Trypanosoma cruzi (strain CL Brener) GN=Tc00.1047053509649.30 PE=4 SV=1	1	10	10	1	33	7	9	7	10	7	9	7	10	1	1	1	1	30.3	30.3	3.4	45608	406	406	1	90	0	250.51	By MS/MS	By MS/MS	By MS/MS	By MS/MS	By MS/MS	By MS/MS	25.4	25.9	18.2	22.4	26.8	30.3	3185000000	438040000	686830000	533190000	851090000
tr|Q4CYX4|Q4CYX4_TRYCC	tr|Q4CYX4|Q4CYX4_TRYCC	12	12	5	>tr|Q4CYX4|Q4CYX4_TRYCC UV excision repair RAD23-like protein, putative OS=Trypanosoma cruzi (strain CL Brener) GN=Tc00.1047053506833.60 PE=4 SV=1	1	12	12	5	33	6	6	11	10	6	6	11	10	2	2	5	5	50.4	50.4	19.9	39041	361	361	1	76	0	50946	By MS/MS	By MS/MS	By MS/MS	By MS/MS	By MS/MS	By MS/MS	25.5	21.3	28.3	25.5	45.2	39.9	2710000000	447580000	471320000	439620000	736570000
tr|Q4DTF6|Q4DTF6_TRYCC;tr|Q4DHH6|Q4DHH6_TRYCC	tr|Q4DTF6|Q4DTF6_TRYCC;tr|Q4DHH6|Q4DHH6_TRYCC	10;10	10;10	10;10	>tr|Q4DTF6|Q4DTF6_TRYCC 26S protease regulatory subunit, putative OS=Trypanosoma cruzi (strain CL Brener) GN=Tc00.1047053510311.70 PE=3 SV=1;>tr|Q4DHH6|Q4DHH6_TRYCC 26S protease regulatory subunit, putative OS=Trypanosoma cruzi (strain CL Brener) GN=Tc00.1	2	10	10	10	33	8	8	8	9	8	8	8	9	8	8	8	9	30.2	30.2	30.2	44568	398	398;398	1	99	0	42753	By MS/MS	By MS/MS	By MS/MS	By MS/MS	By MS/MS	By MS/MS	24.1	24.4	16.6	20.6	24.4	27.4	3472500000	499720000	673540000	619410000	951310000
tr|Q4DLI9|Q4DLI9_TRYCC	tr|Q4DLI9|Q4DLI9_TRYCC	9	9	2	>tr|Q4DLI9|Q4DLI9_TRYCC Phosphoglucomutase, putative OS=Trypanosoma cruzi (strain CL Brener) GN=Tc00.1047053508637.90 PE=3 SV=1	1	9	9	2	33	7	8	9	9	7	8	9	9	1	1	2	2	22.3	22.3	6.5	65899	600	600	1	92	0	35714	By MS/MS	By MS/MS	By MS/MS	By MS/MS	By MS/MS	By MS/MS	17.2	18.7	15.2	18.7	22.3	22.3	3348900000	612490000	651020000	488770000	858150000
tr|Q4DKY2|Q4DKY2_TRYCC;tr|Q4CTE8|Q4CTE8_TRYCC	tr|Q4DKY2|Q4DKY2_TRYCC;tr|Q4CTE8|Q4CTE8_TRYCC	13;11	13;11	13;11	>tr|Q4DKY2|Q4DKY2_TRYCC 2-oxoglutarate dehydrogenase E1 component, putative OS=Trypanosoma cruzi (strain CL Brener) GN=Tc00.1047053506337.70 PE=4 SV=1;>tr|Q4CTE8|Q4CTE8_TRYCC 2-oxoglutarate dehydrogenase E1 component, putative OS=Trypanosoma cruzi (strain	2	13	13	13	33	7	5	11	10	7	5	11	10	7	5	11	10	18.2	18.2	18.2	112.37	1006	1006;1006	1	86	0	65.03	By MS/MS	By MS/MS	By MS/MS	By MS/MS	By MS/MS	By MS/MS	8.9	7.1	7.9	8.9	16	14.4	3595600000	511990000	611790000	674030000	1099500000
tr|Q4DQF0|Q4DQF0_TRYCC;tr|Q4DZK7|Q4DZK7_TRYCC	tr|Q4DQF0|Q4DQF0_TRYCC;tr|Q4DZK7|Q4DZK7_TRYCC	15;14	15;14	15;14	>tr|Q4DQF0|Q4DQF0_TRYCC Uncharacterized protein OS=Trypanosoma cruzi (strain CL Brener) GN=Tc00.1047053506773.120 PE=4 SV=1;>tr|Q4DZK7|Q4DZK7_TRYCC Uncharacterized protein OS=Trypanosoma cruzi (strain CL Brener) GN=Tc00.1047053508799.80 PE=4 SV=1	2	15	15	15	33	6	6	10	11	6	6	10	11	6	6	10	11	18.9	18.9	18.9	120.99	1061	1061;1061	1	85	0	60402	By MS/MS	By MS/MS	By MS/MS	By MS/MS	By MS/MS	By MS/MS	7.4	6.8	3.7	3.7	13.5	14.2	1727900000	159220000	277130000	395810000	620280000
tr|Q4DMX9|Q4DMX9_TRYCC	tr|Q4DMX9|Q4DMX9_TRYCC	9	2	2	>tr|Q4DMX9|Q4DMX9_TRYCC 3-hydroxyisobutyryl-CoA hydrolase, mitochondrial OS=Trypanosoma cruzi (strain CL Brener) GN=Tc00.1047053511529.160 PE=3 SV=1	1	9	2	2	33	7	8	9	9	1	1	2	2	1	1	2	2	29.8	8.8	8.8	40598	362	362	1	26	0	41888	By MS/MS	By MS/MS	By MS/MS	By MS/MS	By MS/MS	By MS/MS	21.3	24.3	29.8	19.1	29.8	29.8	613770000	72126000	63480000	141510000	158840000
tr|Q4DGL0|Q4DGL0_TRYCC	tr|Q4DGL0|Q4DGL0_TRYCC	9	1	1	>tr|Q4DGL0|Q4DGL0_TRYCC DNAK protein, putative (Fragment) OS=Trypanosoma cruzi (strain CL Brener) GN=Tc00.1047053511257.10 PE=3 SV=1	1	9	1	1	33	7	9	8	9	1	1	0	1	1	1	0	1	46.6	6.1	6.1	30113	279	279	1	4	0.0070831	14049	By MS/MS	By MS/MS	By matching	By matching	By matching	By matching	33.3	46.6	26.9	33.3	40.5	46.6	45161000	0	31601000	0	10837000
tr|Q4D1U0|Q4D1U0_TRYCC	tr|Q4D1U0|Q4D1U0_TRYCC	12	3	3	>tr|Q4D1U0|Q4D1U0_TRYCC Uncharacterized protein OS=Trypanosoma cruzi (strain CL Brener) GN=Tc00.1047053509589.40 PE=4 SV=1	1	12	3	3	33	7	6	11	9	1	0	3	2	1	0	3	2	12.3	3.1	3.1	152.29	1384	1384	1	14	0	39566	By matching	By matching	By matching	By MS/MS	By MS/MS	By MS/MS	7	5.9	5.2	7.9	11.6	9.5	156480000	7137600	0	27715000	65179000
tr|Q4E5E4|Q4E5E4_TRYCC	tr|Q4E5E4|Q4E5E4_TRYCC	10	3	3	>tr|Q4E5E4|Q4E5E4_TRYCC Uncharacterized protein OS=Trypanosoma cruzi (strain CL Brener) GN=Tc00.1047053511277.490 PE=4 SV=1	1	10	3	3	33	7	7	9	10	0	1	2	3	0	1	2	3	23.7	8.9	8.9	50084	460	460	1	15	0	20824	By matching	By MS/MS	By matching	By matching	By MS/MS	By MS/MS	14.8	14.8	14.8	14.8	21.5	23.7	403470000	0	0	153400000	250070000
tr|Q4CW22|Q4CW22_TRYCC	tr|Q4CW22|Q4CW22_TRYCC	8	8	8	>tr|Q4CW22|Q4CW22_TRYCC Uncharacterized protein OS=Trypanosoma cruzi (strain CL Brener) GN=Tc00.1047053504001.20 PE=4 SV=1	1	8	8	8	32	8	8	8	8	8	8	8	8	8	8	8	8	54.7	54.7	54.7	12959	117	117	1	179	0	161.66	By MS/MS	By MS/MS	By MS/MS	By MS/MS	By MS/MS	By MS/MS	54.7	54.7	54.7	54.7	54.7	54.7	20744000000	3568000000	4812300000	3507500000	4127800000
tr|Q4CPR5|Q4CPR5_TRYCC	tr|Q4CPR5|Q4CPR5_TRYCC	9	9	1	>tr|Q4CPR5|Q4CPR5_TRYCC Proteasome activator protein PA26, putative OS=Trypanosoma cruzi (strain CL Brener) GN=Tc00.1047053511465.10 PE=4 SV=1	1	9	9	1	32	7	7	9	9	7	7	9	9	1	1	1	1	43.4	43.4	3.8	25568	235	235	1	120	0	187.61	By MS/MS	By MS/MS	By MS/MS	By MS/MS	By MS/MS	By MS/MS	34	34	34	34	43.4	43.4	13191000000	2054000000	2403200000	2123600000	3991300000
tr|Q4D144|Q4D144_TRYCC;tr|Q4DIK4|Q4DIK4_TRYCC	tr|Q4D144|Q4D144_TRYCC;tr|Q4DIK4|Q4DIK4_TRYCC	8;5	8;5	8;5	>tr|Q4D144|Q4D144_TRYCC Proteasome subunit alpha type OS=Trypanosoma cruzi (strain CL Brener) GN=Tc00.1047053506985.30 PE=3 SV=1;>tr|Q4DIK4|Q4DIK4_TRYCC Proteasome subunit alpha type OS=Trypanosoma cruzi (strain CL Brener) GN=Tc00.1047053504213.120 PE=3 SV	2	8	8	8	32	8	8	8	8	8	8	8	8	8	8	8	8	30.8	30.8	30.8	31929	286	286;286	1	98	0	263.83	By MS/MS	By MS/MS	By MS/MS	By MS/MS	By MS/MS	By MS/MS	30.8	30.8	14.3	21.7	30.8	30.8	6026900000	930450000	1190800000	900580000	1864500000
tr|Q4E3Q0|Q4E3Q0_TRYCC;tr|Q4E0P5|Q4E0P5_TRYCC	tr|Q4E3Q0|Q4E3Q0_TRYCC;tr|Q4E0P5|Q4E0P5_TRYCC	8;8	8;8	8;8	>tr|Q4E3Q0|Q4E3Q0_TRYCC Pretranslocation protein, alpha subunit, putative OS=Trypanosoma cruzi (strain CL Brener) GN=Tc00.1047053510101.70 PE=3 SV=1;>tr|Q4E0P5|Q4E0P5_TRYCC Pretranslocation protein, alpha subunit, putative OS=Trypanosoma cruzi (strain CL B	2	8	8	8	32	8	8	8	8	8	8	8	8	8	8	8	8	16.8	16.8	16.8	53533	481	481;481	1	111	0	26.17	By MS/MS	By MS/MS	By MS/MS	By MS/MS	By MS/MS	By MS/MS	16.8	16.8	16.8	16.8	16.8	16.8	5972400000	966430000	1527100000	1079100000	1268100000
tr|Q4DIT2|Q4DIT2_TRYCC;tr|Q4DLG3|Q4DLG3_TRYCC	tr|Q4DIT2|Q4DIT2_TRYCC;tr|Q4DLG3|Q4DLG3_TRYCC	10;9	10;9	10;9	>tr|Q4DIT2|Q4DIT2_TRYCC 2-methoxy-6-polyprenyl-1,4-benzoquinol methylase, mitochondrial OS=Trypanosoma cruzi (strain CL Brener) GN=Tc00.1047053510285.60 PE=3 SV=1;>tr|Q4DLG3|Q4DLG3_TRYCC 2-methoxy-6-polyprenyl-1,4-benzoquinol methylase, mitochondrial OS=Tr	2	10	10	10	32	8	7	9	8	8	7	9	8	8	7	9	8	43.4	43.4	43.4	32695	290	290;290	1	100	0	19817	By MS/MS	By MS/MS	By MS/MS	By MS/MS	By MS/MS	By MS/MS	32.4	30	27.6	28.6	37.2	36.2	4996900000	871510000	705650000	966800000	1552600000
tr|Q4E3M6|Q4E3M6_TRYCC;tr|Q4DFT9|Q4DFT9_TRYCC	tr|Q4E3M6|Q4E3M6_TRYCC;tr|Q4DFT9|Q4DFT9_TRYCC	12;9	12;9	12;9	>tr|Q4E3M6|Q4E3M6_TRYCC Uncharacterized protein OS=Trypanosoma cruzi (strain CL Brener) GN=Tc00.1047053510101.350 PE=4 SV=1;>tr|Q4DFT9|Q4DFT9_TRYCC Uncharacterized protein OS=Trypanosoma cruzi (strain CL Brener) GN=Tc00.1047053507765.130 PE=4 SV=1	2	12	12	12	32	5	5	10	12	5	5	10	12	5	5	10	12	40.2	40.2	40.2	52459	473	473;474	1	115	0	225.4	By MS/MS	By MS/MS	By MS/MS	By MS/MS	By MS/MS	By MS/MS	11.4	12.5	11.4	12.5	32.3	40.2	7998600000	836610000	1026400000	1772500000	3602200000
tr|Q4E0V0|Q4E0V0_TRYCC	tr|Q4E0V0|Q4E0V0_TRYCC	10	10	5	>tr|Q4E0V0|Q4E0V0_TRYCC Importin subunit alpha OS=Trypanosoma cruzi (strain CL Brener) GN=Tc00.1047053509965.110 PE=3 SV=1	1	10	10	5	32	8	7	8	9	8	7	8	9	3	3	4	5	27.4	27.4	13.1	57982	533	533	1	94	0	81344	By MS/MS	By MS/MS	By MS/MS	By MS/MS	By MS/MS	By MS/MS	21.6	17.1	15.8	18.2	21.8	25.5	5354800000	711550000	1036600000	815620000	2065900000
tr|Q4DA56|Q4DA56_TRYCC	tr|Q4DA56|Q4DA56_TRYCC	9	9	9	>tr|Q4DA56|Q4DA56_TRYCC Nitrate reductase, putative OS=Trypanosoma cruzi (strain CL Brener) GN=Tc00.1047053507019.20 PE=3 SV=1	1	9	9	9	32	8	7	8	9	8	7	8	9	8	7	8	9	28.5	28.5	28.5	52357	484	484	1	104	0	96433	By MS/MS	By MS/MS	By MS/MS	By MS/MS	By MS/MS	By MS/MS	24	21.5	20	21.5	24	28.5	4182900000	643040000	871220000	664550000	1137300000
sp|Q4DLT6|PURA1_TRYCC;sp|Q4CWX1|PURA2_TRYCC	sp|Q4DLT6|PURA1_TRYCC;sp|Q4CWX1|PURA2_TRYCC	10;10	10;10	10;10	>sp|Q4DLT6|PURA1_TRYCC Adenylosuccinate synthetase 1 OS=Trypanosoma cruzi (strain CL Brener) GN=Tc00.1047053509683.80 PE=3 SV=1;>sp|Q4CWX1|PURA2_TRYCC Adenylosuccinate synthetase 2 OS=Trypanosoma cruzi (strain CL Brener) GN=Tc00.1047053508731.60 PE=3 SV=1	2	10	10	10	32	8	8	9	7	8	8	9	7	8	8	9	7	21.4	21.4	21.4	68319	616	616;616	1	104	0	94636	By MS/MS	By MS/MS	By MS/MS	By MS/MS	By MS/MS	By MS/MS	15.9	17.5	15.9	19.2	19.8	14.8	5568300000	869890000	1281000000	707970000	1376300000
tr|Q4DK73|Q4DK73_TRYCC;tr|Q4DSC2|Q4DSC2_TRYCC	tr|Q4DK73|Q4DK73_TRYCC;tr|Q4DSC2|Q4DSC2_TRYCC	12;10	12;10	12;10	>tr|Q4DK73|Q4DK73_TRYCC Uncharacterized protein OS=Trypanosoma cruzi (strain CL Brener) GN=Tc00.1047053509601.120 PE=4 SV=1;>tr|Q4DSC2|Q4DSC2_TRYCC Uncharacterized protein OS=Trypanosoma cruzi (strain CL Brener) GN=Tc00.1047053509767.120 PE=4 SV=1	2	12	12	12	32	7	8	8	9	7	8	8	9	7	8	8	9	31.3	31.3	31.3	61409	549	549;549	1	103	0	24384	By MS/MS	By MS/MS	By MS/MS	By MS/MS	By MS/MS	By MS/MS	17.5	20.8	13.8	17.7	24.6	25.1	3930500000	591180000	1112600000	639160000	866800000
tr|Q4CP61|Q4CP61_TRYCC	tr|Q4CP61|Q4CP61_TRYCC	9	2	2	>tr|Q4CP61|Q4CP61_TRYCC Uncharacterized protein OS=Trypanosoma cruzi (strain CL Brener) GN=Tc00.1047053508549.20 PE=4 SV=1	1	9	2	2	32	8	9	8	7	2	2	2	1	2	2	2	1	39.1	7	7	29295	258	258	1	19	0.0052425	15093	By MS/MS	By MS/MS	By MS/MS	By MS/MS	By MS/MS	By MS/MS	34.9	39.1	34.9	26.4	34.9	31.4	1231000000	311110000	310070000	152090000	178790000
tr|Q4CPG2|Q4CPG2_TRYCC	tr|Q4CPG2|Q4CPG2_TRYCC	11	11	11	>tr|Q4CPG2|Q4CPG2_TRYCC Dynein heavy chain, putative (Fragment) OS=Trypanosoma cruzi (strain CL Brener) GN=Tc00.1047053509583.19 PE=4 SV=1	1	11	11	11	32	6	8	9	9	6	8	9	9	6	8	9	9	17.2	17.2	17.2	90231	791	791	1	106	0	64137	By MS/MS	By MS/MS	By MS/MS	By MS/MS	By MS/MS	By MS/MS	10.4	12.3	14.5	10.4	13.7	14.7	3515900000	562840000	948170000	391230000	823130000
sp|Q4CUM2|MVP_TRYCC;tr|Q4CRB1|Q4CRB1_TRYCC;tr|Q4CYD6|Q4CYD6_TRYCC	sp|Q4CUM2|MVP_TRYCC;tr|Q4CRB1|Q4CRB1_TRYCC	9;7;2	9;7;2	9;7;2	>sp|Q4CUM2|MVP_TRYCC Major vault protein OS=Trypanosoma cruzi (strain CL Brener) GN=Tc00.1047053510353.10 PE=3 SV=1;>tr|Q4CRB1|Q4CRB1_TRYCC Major vault protein, putative (Fragment) OS=Trypanosoma cruzi (strain CL Brener) GN=Tc00.1047053509541.19 PE=4 SV=1	3	9	9	9	32	8	7	8	9	8	7	8	9	8	7	8	9	15.8	15.8	15.8	94524	838	838;610;214	1	107	0	60456	By MS/MS	By MS/MS	By MS/MS	By MS/MS	By MS/MS	By MS/MS	14.7	13.1	13.5	12.4	14.2	15.8	3828900000	641130000	623580000	615720000	1237300000
tr|Q4DIN6|Q4DIN6_TRYCC	tr|Q4DIN6|Q4DIN6_TRYCC	12	12	12	>tr|Q4DIN6|Q4DIN6_TRYCC Uncharacterized protein OS=Trypanosoma cruzi (strain CL Brener) GN=Tc00.1047053508045.100 PE=4 SV=1	1	12	12	12	32	6	6	10	10	6	6	10	10	6	6	10	10	30	30	30	68588	623	623	1	66	0	40698	By MS/MS	By MS/MS	By MS/MS	By MS/MS	By MS/MS	By MS/MS	15.1	14.9	13	9.8	25.8	24.4	2513000000	471810000	628870000	379600000	941690000
tr|Q4D112|Q4D112_TRYCC	tr|Q4D112|Q4D112_TRYCC	11	1	1	>tr|Q4D112|Q4D112_TRYCC Pyrroline-5-carboxylate synthetase-like protein, putative (Fragment) OS=Trypanosoma cruzi (strain CL Brener) GN=Tc00.1047053509067.70 PE=3 SV=1	1	11	1	1	32	6	6	9	11	1	1	1	1	1	1	1	1	28.5	2.2	2.2	48692	452	452	1	8	0.0039801	15944	By matching	By matching	By matching	By MS/MS	By MS/MS	By MS/MS	15.7	15.7	13.7	10	24.8	28.5	1239800000	219750000	477950000	264120000	140760000
tr|Q4D086|Q4D086_TRYCC;tr|Q4DZ19|Q4DZ19_TRYCC	tr|Q4D086|Q4D086_TRYCC;tr|Q4DZ19|Q4DZ19_TRYCC	9;7	1;1	1;1	>tr|Q4D086|Q4D086_TRYCC Proteasome activator protein PA26, putative (Fragment) OS=Trypanosoma cruzi (strain CL Brener) GN=Tc00.1047053503841.10 PE=4 SV=1;>tr|Q4DZ19|Q4DZ19_TRYCC Proteasome activator protein PA26, putative OS=Trypanosoma cruzi (strain CL Br	2	9	1	1	32	7	7	9	9	1	1	1	1	1	1	1	1	44.9	4	4	24.66	227	227;138	1	11	1	-2	By MS/MS	By MS/MS	By matching	By MS/MS	By MS/MS	By matching	35.2	35.2	35.2	35.2	44.9	44.9	908150000	169040000	221440000	61202000	227790000
tr|Q4E0T5|Q4E0T5_TRYCC;tr|Q4DG09|Q4DG09_TRYCC	tr|Q4E0T5|Q4E0T5_TRYCC;tr|Q4DG09|Q4DG09_TRYCC	11;10	11;10	11;10	>tr|Q4E0T5|Q4E0T5_TRYCC Ubiquitin fusion degradation protein 2, putative OS=Trypanosoma cruzi (strain CL Brener) GN=Tc00.1047053509965.250 PE=4 SV=1;>tr|Q4DG09|Q4DG09_TRYCC Ubiquitin fusion degradation protein 2, putative OS=Trypanosoma cruzi (strain CL Br	2	11	11	11	32	6	6	9	11	6	6	9	11	6	6	9	11	19.3	19.3	19.3	114.07	1012	1012;1012	1	84	0	116.19	By MS/MS	By MS/MS	By MS/MS	By MS/MS	By MS/MS	By MS/MS	9.9	10.1	14	14.1	15.1	19.3	2116100000	286800000	333440000	447390000	699360000
tr|Q4CXY8|Q4CXY8_TRYCC	tr|Q4CXY8|Q4CXY8_TRYCC	10	2	2	>tr|Q4CXY8|Q4CXY8_TRYCC Uncharacterized protein OS=Trypanosoma cruzi (strain CL Brener) GN=Tc00.1047053508059.50 PE=4 SV=1	1	10	2	2	32	7	7	9	9	2	1	1	1	2	1	1	1	51.7	14.1	14.1	26764	234	234	1	13	1	-2	By MS/MS	By matching	By MS/MS	By matching	By MS/MS	By MS/MS	33.3	29.5	19.2	23.5	41.9	41.9	374830000	71467000	93969000	36535000	64336000
tr|Q4DG20|Q4DG20_TRYCC	tr|Q4DG20|Q4DG20_TRYCC	9	1	1	>tr|Q4DG20|Q4DG20_TRYCC Cystathionine beta-synthase, putative (Fragment) OS=Trypanosoma cruzi (strain CL Brener) GN=Tc00.1047053508241.149 PE=4 SV=1	1	9	1	1	32	8	8	8	8	1	1	1	1	1	1	1	1	86.9	19.2	19.2	10.61	99	99	1	7	0.0028001	19118	By matching	By matching	By MS/MS	By matching	By MS/MS	By matching	81.8	81.8	70.7	40.4	75.8	75.8	595590000	32081000	27764000	201910000	333830000
tr|Q4DKD3|Q4DKD3_TRYCC;tr|Q4DD64|Q4DD64_TRYCC	tr|Q4DKD3|Q4DKD3_TRYCC;tr|Q4DD64|Q4DD64_TRYCC	11;9	7;5	4;3	>tr|Q4DKD3|Q4DKD3_TRYCC Retrotransposon hot spot (RHS) protein, putative OS=Trypanosoma cruzi (strain CL Brener) GN=Tc00.1047053509295.80 PE=4 SV=1;>tr|Q4DD64|Q4DD64_TRYCC Retrotransposon hot spot (RHS) protein, putative OS=Trypanosoma cruzi (strain CL Bre	2	11	7	4	32	5	8	11	8	4	6	7	6	2	3	4	4	17.7	12.2	7.7	89871	793	793;793	1	43	0	33.75	By MS/MS	By MS/MS	By MS/MS	By MS/MS	By MS/MS	By MS/MS	8.2	13.5	9.2	8.1	17.7	14	857400000	114200000	207400000	170350000	273310000
tr|Q4CYY4|Q4CYY4_TRYCC	tr|Q4CYY4|Q4CYY4_TRYCC	12	4	2	>tr|Q4CYY4|Q4CYY4_TRYCC Retrotransposon hot spot (RHS) protein, putative OS=Trypanosoma cruzi (strain CL Brener) GN=Tc00.1047053505373.10 PE=4 SV=1	1	12	4	2	32	7	8	9	8	2	2	2	2	1	1	1	1	15.4	6	3.1	112.75	987	987	1	32	0	10191	By MS/MS	By MS/MS	By MS/MS	By MS/MS	By MS/MS	By MS/MS	8.6	10	10.9	9.7	11.7	11.2	854920000	92538000	238680000	155410000	198120000
tr|Q4DJQ1|Q4DJQ1_TRYCC	tr|Q4DJQ1|Q4DJQ1_TRYCC	10	10	6	>tr|Q4DJQ1|Q4DJQ1_TRYCC Uncharacterized protein OS=Trypanosoma cruzi (strain CL Brener) GN=Tc00.1047053507895.124 PE=4 SV=1	1	10	10	6	32	6	6	10	10	6	6	10	10	3	3	6	6	38	38	7.4	145.57	1288	1288	1	77	0	303.72	By MS/MS	By MS/MS	By MS/MS	By MS/MS	By MS/MS	By MS/MS	33.2	34.2	33.2	34.2	38	38	1506000000	257080000	112200000	310020000	455710000
tr|Q4DV37|Q4DV37_TRYCC	tr|Q4DV37|Q4DV37_TRYCC	9	1	1	>tr|Q4DV37|Q4DV37_TRYCC Malic enzyme OS=Trypanosoma cruzi (strain CL Brener) GN=Tc00.1047053508647.270 PE=3 SV=1	1	9	1	1	32	8	8	8	8	1	1	1	1	1	1	1	1	22.2	3.8	3.8	63626	573	573	1	18	0	26612	By MS/MS	By MS/MS	By MS/MS	By MS/MS	By MS/MS	By MS/MS	19.7	19.7	19.7	20.1	19.7	19.7	441440000	64993000	37424000	52814000	166990000
tr|Q4CU66|Q4CU66_TRYCC	tr|Q4CU66|Q4CU66_TRYCC	13	5	1	>tr|Q4CU66|Q4CU66_TRYCC Retrotransposon hot spot (RHS) protein, putative OS=Trypanosoma cruzi (strain CL Brener) GN=Tc00.1047053463155.20 PE=4 SV=1	1	13	5	1	32	6	5	11	10	2	1	3	4	0	0	0	1	16.4	6.8	1.5	112.18	987	987	1	22	0	46677	By MS/MS	By MS/MS	By MS/MS	By MS/MS	By MS/MS	By MS/MS	5.3	5	5.9	5.9	12.8	12.7	594500000	120820000	89495000	150710000	163470000
tr|Q4D6D8|Q4D6D8_TRYCC;tr|Q4D586|Q4D586_TRYCC	tr|Q4D6D8|Q4D6D8_TRYCC;tr|Q4D586|Q4D586_TRYCC	8;8	8;8	8;8	>tr|Q4D6D8|Q4D6D8_TRYCC Uncharacterized protein OS=Trypanosoma cruzi (strain CL Brener) GN=Tc00.1047053509047.40 PE=4 SV=1;>tr|Q4D586|Q4D586_TRYCC Uncharacterized protein OS=Trypanosoma cruzi (strain CL Brener) GN=Tc00.1047053507927.60 PE=4 SV=1	2	8	8	8	31	8	7	8	8	8	7	8	8	8	7	8	8	41.9	41.9	41.9	21151	198	198;198	1	169	0	225.87	By MS/MS	By MS/MS	By MS/MS	By MS/MS	By MS/MS	By MS/MS	41.9	41.9	41.9	41.9	41.9	41.9	29623000000	5307700000	6710400000	5729200000	6670400000
tr|Q4D6T8|Q4D6T8_TRYCC	tr|Q4D6T8|Q4D6T8_TRYCC	9	9	2	>tr|Q4D6T8|Q4D6T8_TRYCC Universal minicircle sequence binding protein (UMSBP), putative OS=Trypanosoma cruzi (strain CL Brener) GN=Tc00.1047053507639.20 PE=4 SV=1	1	9	9	2	31	8	8	8	7	8	8	8	7	2	1	1	0	70.5	70.5	13.5	20417	193	193	1	190	0	109.74	By MS/MS	By MS/MS	By MS/MS	By MS/MS	By MS/MS	By MS/MS	63.7	61.7	70.5	61.7	65.8	57	26518000000	4115700000	4901400000	4765200000	8267800000
tr|Q4CSX7|Q4CSX7_TRYCC	tr|Q4CSX7|Q4CSX7_TRYCC	9	9	5	>tr|Q4CSX7|Q4CSX7_TRYCC Peptide methionine sulfoxide reductase, putative OS=Trypanosoma cruzi (strain CL Brener) GN=Tc00.1047053510855.10 PE=3 SV=1	1	9	9	5	31	7	6	9	9	7	6	9	9	4	2	5	5	57.1	57.1	37.3	20.09	177	177	1	108	0	86661	By MS/MS	By MS/MS	By MS/MS	By MS/MS	By MS/MS	By MS/MS	50.3	35	50.3	40.1	57.1	57.1	8771100000	1673600000	1635100000	1252500000	2180200000
tr|Q4DAW5|Q4DAW5_TRYCC;tr|Q4D1H9|Q4D1H9_TRYCC	tr|Q4DAW5|Q4DAW5_TRYCC;tr|Q4D1H9|Q4D1H9_TRYCC	10;9	10;9	10;9	>tr|Q4DAW5|Q4DAW5_TRYCC Cytochrome C oxidase subunit VI, putative OS=Trypanosoma cruzi (strain CL Brener) GN=Tc00.1047053504069.20 PE=4 SV=1;>tr|Q4D1H9|Q4D1H9_TRYCC Cytochrome C oxidase subunit VI, putative OS=Trypanosoma cruzi (strain CL Brener) GN=Tc00.1	2	10	10	10	31	6	6	9	10	6	6	9	10	6	6	9	10	54.1	54.1	54.1	19101	157	157;157	1	114	0	96278	By MS/MS	By MS/MS	By MS/MS	By MS/MS	By MS/MS	By MS/MS	35	35	30.6	41.4	49.7	54.1	7432000000	945730000	1620100000	1204000000	2182500000
tr|Q4CZR0|Q4CZR0_TRYCC	tr|Q4CZR0|Q4CZR0_TRYCC	9	9	8	>tr|Q4CZR0|Q4CZR0_TRYCC Small GTP-binding protein Rab1, putative OS=Trypanosoma cruzi (strain CL Brener) GN=Tc00.1047053503715.30 PE=4 SV=1	1	9	9	8	31	7	7	9	8	7	7	9	8	7	7	8	7	39.5	39.5	34.3	22833	210	210	1	100	0	66466	By MS/MS	By MS/MS	By MS/MS	By MS/MS	By MS/MS	By MS/MS	30	30	39.5	39.5	39.5	39.5	8625000000	1314500000	1678700000	1267200000	2544600000
tr|Q4CNI8|Q4CNI8_TRYCC	tr|Q4CNI8|Q4CNI8_TRYCC	9	9	2	>tr|Q4CNI8|Q4CNI8_TRYCC Uncharacterized protein OS=Trypanosoma cruzi (strain CL Brener) GN=Tc00.1047053509139.10 PE=4 SV=1	1	9	9	2	31	6	8	9	8	6	8	9	8	1	2	2	2	23	23	3.8	56356	525	525	1	120	0	136.3	By MS/MS	By MS/MS	By MS/MS	By MS/MS	By MS/MS	By MS/MS	18.1	21.5	14.9	18.1	23	20	14992000000	1873300000	2781200000	3275100000	5986600000
tr|Q4D6M9|Q4D6M9_TRYCC	tr|Q4D6M9|Q4D6M9_TRYCC	8	8	8	>tr|Q4D6M9|Q4D6M9_TRYCC Uncharacterized protein OS=Trypanosoma cruzi (strain CL Brener) GN=Tc00.1047053508357.100 PE=4 SV=1	1	8	8	8	31	8	7	8	8	8	7	8	8	8	7	8	8	33.4	33.4	33.4	36335	326	326	1	101	0	51.65	By MS/MS	By MS/MS	By MS/MS	By MS/MS	By MS/MS	By MS/MS	33.4	25.5	25.5	25.5	33.4	33.4	5462900000	820590000	1248000000	869940000	1568300000
tr|Q4DI05|Q4DI05_TRYCC	tr|Q4DI05|Q4DI05_TRYCC	8	8	2	>tr|Q4DI05|Q4DI05_TRYCC Uncharacterized protein OS=Trypanosoma cruzi (strain CL Brener) GN=Tc00.1047053511071.100 PE=4 SV=1	1	8	8	2	31	7	8	8	8	7	8	8	8	2	2	2	2	32.8	32.8	3.3	38447	335	335	1	103	0	31682	By MS/MS	By MS/MS	By MS/MS	By MS/MS	By MS/MS	By MS/MS	29.6	32.8	28.7	29.6	32.8	32.8	4373300000	769550000	1165800000	716740000	992050000
tr|Q4D6Y1|Q4D6Y1_TRYCC	tr|Q4D6Y1|Q4D6Y1_TRYCC	9	9	9	>tr|Q4D6Y1|Q4D6Y1_TRYCC Uncharacterized protein OS=Trypanosoma cruzi (strain CL Brener) GN=Tc00.1047053508813.60 PE=4 SV=1	1	9	9	9	31	7	6	9	9	7	6	9	9	7	6	9	9	26.6	26.6	26.6	45799	414	414	1	114	0	122.18	By MS/MS	By MS/MS	By MS/MS	By MS/MS	By MS/MS	By MS/MS	21.7	19.3	21.7	18.8	26.6	26.6	6695500000	1009500000	1124600000	1435500000	2014700000
tr|Q4DC80|Q4DC80_TRYCC	tr|Q4DC80|Q4DC80_TRYCC	10	10	9	>tr|Q4DC80|Q4DC80_TRYCC Glycerol-3-phosphate dehydrogenase OS=Trypanosoma cruzi (strain CL Brener) GN=Tc00.1047053511151.90 PE=3 SV=1	1	10	10	9	31	8	10	6	7	8	10	6	7	7	9	5	6	19.4	19.4	17.7	67126	603	603	1	127	0	123.14	By MS/MS	By MS/MS	By MS/MS	By MS/MS	By MS/MS	By MS/MS	15.6	19.4	17.4	13.6	13.4	13.8	6084500000	952020000	1720400000	591930000	1447900000
tr|Q4D0B9|Q4D0B9_TRYCC	tr|Q4D0B9|Q4D0B9_TRYCC	10	10	10	>tr|Q4D0B9|Q4D0B9_TRYCC Proteasome regulatory ATPase subunit 2, putative OS=Trypanosoma cruzi (strain CL Brener) GN=Tc00.1047053511047.50 PE=3 SV=1	1	10	10	10	31	7	7	9	8	7	7	9	8	7	7	9	8	36.2	36.2	36.2	48991	437	437	1	103	0	145.78	By MS/MS	By MS/MS	By MS/MS	By MS/MS	By MS/MS	By MS/MS	24	24	25.2	28.6	33	28.4	4634100000	867430000	868910000	708370000	1014800000
tr|Q4CS72|Q4CS72_TRYCC	tr|Q4CS72|Q4CS72_TRYCC	9	9	2	>tr|Q4CS72|Q4CS72_TRYCC Protein kinase C substrate protein, heavy chain, putative OS=Trypanosoma cruzi (strain CL Brener) GN=Tc00.1047053508215.9 PE=4 SV=1	1	9	9	2	31	8	7	8	8	8	7	8	8	1	2	1	2	21	21	4	55519	480	480	1	113	0	101.51	By MS/MS	By MS/MS	By MS/MS	By MS/MS	By MS/MS	By MS/MS	21	18.3	21	18.3	21	21	3899400000	711840000	786950000	525610000	853840000
tr|Q4E0Y0|Q4E0Y0_TRYCC	tr|Q4E0Y0|Q4E0Y0_TRYCC	10	10	5	>tr|Q4E0Y0|Q4E0Y0_TRYCC Glutaminyl-tRNA synthetase, putative OS=Trypanosoma cruzi (strain CL Brener) GN=Tc00.1047053508277.160 PE=3 SV=1	1	10	10	5	31	6	8	9	8	6	8	9	8	3	3	5	4	25	25	10.9	66263	571	571	1	127	0	182.52	By MS/MS	By MS/MS	By MS/MS	By MS/MS	By MS/MS	By MS/MS	15.2	19.4	16.8	17	23.5	19.4	5203000000	759400000	1166800000	873570000	1486300000
tr|Q4DSE5|Q4DSE5_TRYCC	tr|Q4DSE5|Q4DSE5_TRYCC	9	9	9	>tr|Q4DSE5|Q4DSE5_TRYCC Uncharacterized protein OS=Trypanosoma cruzi (strain CL Brener) GN=Tc00.1047053504057.97 PE=4 SV=1	1	9	9	9	31	7	7	9	8	7	7	9	8	7	7	9	8	33	33	33	40157	364	364	1	90	0	57182	By MS/MS	By MS/MS	By MS/MS	By MS/MS	By MS/MS	By MS/MS	26.6	26.6	26.9	26.6	33	26.9	2700800000	486920000	637550000	343260000	439320000
tr|Q4CM65|Q4CM65_TRYCC	tr|Q4CM65|Q4CM65_TRYCC	11	11	1	>tr|Q4CM65|Q4CM65_TRYCC Pyrroline-5-carboxylate synthetase-like protein, putative (Fragment) OS=Trypanosoma cruzi (strain CL Brener) GN=Tc00.1047053511023.10 PE=3 SV=1	1	11	11	1	31	5	6	9	11	5	6	9	11	0	1	1	1	34.7	34.7	4.8	42795	398	398	1	81	0	54531	By MS/MS	By MS/MS	By MS/MS	By MS/MS	By MS/MS	By MS/MS	15.3	20.1	13.1	8.8	30.4	34.7	3623800000	416020000	553130000	804650000	1560200000
tr|Q4DCU2|Q4DCU2_TRYCC;tr|Q4D9I1|Q4D9I1_TRYCC	tr|Q4DCU2|Q4DCU2_TRYCC;tr|Q4D9I1|Q4D9I1_TRYCC	9;9	9;9	9;9	>tr|Q4DCU2|Q4DCU2_TRYCC NADH dehydrogenase, putative OS=Trypanosoma cruzi (strain CL Brener) GN=Tc00.1047053506839.70 PE=4 SV=1;>tr|Q4D9I1|Q4D9I1_TRYCC NADH dehydrogenase, putative OS=Trypanosoma cruzi (strain CL Brener) GN=Tc00.1047053508717.20 PE=4 SV=1	2	9	9	9	31	7	6	9	9	7	6	9	9	7	6	9	9	19.5	19.5	19.5	56.43	512	512;512	1	90	0	32261	By MS/MS	By MS/MS	By MS/MS	By MS/MS	By MS/MS	By MS/MS	12.3	10.5	9	10.5	19.5	19.5	3989600000	633660000	686550000	830130000	1170100000
tr|Q4DYL2|Q4DYL2_TRYCC	tr|Q4DYL2|Q4DYL2_TRYCC	10	1	1	>tr|Q4DYL2|Q4DYL2_TRYCC RNA-binding protein, putative OS=Trypanosoma cruzi (strain CL Brener) GN=Tc00.1047053506211.60 PE=4 SV=1	1	10	1	1	31	7	5	9	10	1	1	1	1	1	1	1	1	22.2	3.1	3.1	60966	546	546	1	25	0	34393	By MS/MS	By MS/MS	By MS/MS	By MS/MS	By MS/MS	By MS/MS	18.9	12.3	14.1	12.3	22	22.2	1895500000	307600000	404100000	248640000	455490000
tr|Q4DK32|Q4DK32_TRYCC	tr|Q4DK32|Q4DK32_TRYCC	12	12	2	>tr|Q4DK32|Q4DK32_TRYCC Uncharacterized protein OS=Trypanosoma cruzi (strain CL Brener) GN=Tc00.1047053506525.10 PE=4 SV=1	1	12	12	2	31	6	5	10	10	6	5	10	10	1	1	1	2	29.4	29.4	4.8	57914	503	503	1	80	0	29.26	By MS/MS	By MS/MS	By MS/MS	By MS/MS	By MS/MS	By MS/MS	12.9	10.7	15.1	8.9	25.6	26	3073200000	414600000	427150000	754750000	1093800000
tr|Q4DF48|Q4DF48_TRYCC	tr|Q4DF48|Q4DF48_TRYCC	13	13	1	>tr|Q4DF48|Q4DF48_TRYCC Uncharacterized protein OS=Trypanosoma cruzi (strain CL Brener) GN=Tc00.1047053508177.10 PE=4 SV=1	1	13	13	1	31	6	5	10	10	6	5	10	10	0	0	1	0	32.2	32.2	3.3	67882	630	630	1	77	0	37616	By MS/MS	By MS/MS	By MS/MS	By MS/MS	By MS/MS	By MS/MS	11.9	10	10	7.9	24.6	22.2	2837400000	313900000	500660000	564760000	946560000
tr|Q4E355|Q4E355_TRYCC	tr|Q4E355|Q4E355_TRYCC	9	2	2	>tr|Q4E355|Q4E355_TRYCC Uncharacterized protein OS=Trypanosoma cruzi (strain CL Brener) GN=Tc00.1047053508741.170 PE=4 SV=1	1	9	2	2	31	7	7	9	8	2	1	2	2	2	1	2	2	23	3.8	3.8	56114	525	525	1	20	0	93342	By MS/MS	By MS/MS	By MS/MS	By MS/MS	By MS/MS	By MS/MS	18.5	21.1	14.9	18.1	23	20	2262700000	296210000	256150000	639500000	934330000
tr|Q4DDM9|Q4DDM9_TRYCC;tr|Q4D8Y5|Q4D8Y5_TRYCC;tr|Q4CM60|Q4CM60_TRYCC	tr|Q4DDM9|Q4DDM9_TRYCC	11;2;1	11;2;1	11;2;1	>tr|Q4DDM9|Q4DDM9_TRYCC Serine/threonine-protein phosphatase OS=Trypanosoma cruzi (strain CL Brener) GN=Tc00.1047053507601.10 PE=3 SV=1	3	11	11	11	31	6	7	9	9	6	7	9	9	6	7	9	9	20.3	20.3	20.3	71377	637	637;158;178	1	68	0	33729	By MS/MS	By MS/MS	By MS/MS	By MS/MS	By MS/MS	By MS/MS	12.1	13.3	10.5	9.6	18.4	19	2215800000	249760000	519610000	422330000	717230000
tr|Q4CUG6|Q4CUG6_TRYCC;tr|Q4CQ93|Q4CQ93_TRYCC	tr|Q4CUG6|Q4CUG6_TRYCC	10;3	1;1	1;1	>tr|Q4CUG6|Q4CUG6_TRYCC Inosine-5-monophosphate dehydrogenase OS=Trypanosoma cruzi (strain CL Brener) GN=Tc00.1047053507211.40 PE=3 SV=1	2	10	1	1	31	5	7	9	10	1	1	1	1	1	1	1	1	23.4	3.5	3.5	55601	512	512;201	1	21	0	4.08	By MS/MS	By MS/MS	By MS/MS	By MS/MS	By MS/MS	By MS/MS	12.1	18.2	12.1	12.1	23.2	23.4	1617800000	243720000	299510000	251470000	595920000
tr|Q4DE64|Q4DE64_TRYCC;tr|Q4DQ13|Q4DQ13_TRYCC	tr|Q4DE64|Q4DE64_TRYCC;tr|Q4DQ13|Q4DQ13_TRYCC	10;8	10;8	10;8	>tr|Q4DE64|Q4DE64_TRYCC DNA topoisomerase IA, putative OS=Trypanosoma cruzi (strain CL Brener) GN=Tc00.1047053506493.80 PE=4 SV=1;>tr|Q4DQ13|Q4DQ13_TRYCC DNA topoisomerase IA, putative OS=Trypanosoma cruzi (strain CL Brener) GN=Tc00.1047053510121.160 PE=4	2	10	10	10	31	6	6	10	9	6	6	10	9	6	6	10	9	20.9	20.9	20.9	91882	829	829;830	1	93	0	143.44	By MS/MS	By MS/MS	By MS/MS	By MS/MS	By MS/MS	By MS/MS	11.2	12.3	7.6	9.3	20.9	17.9	2231400000	381260000	531660000	403190000	479550000
tr|Q4D5X8|Q4D5X8_TRYCC	tr|Q4D5X8|Q4D5X8_TRYCC	9	1	1	>tr|Q4D5X8|Q4D5X8_TRYCC Nucleosome assembly protein, putative OS=Trypanosoma cruzi (strain CL Brener) GN=Tc00.1047053507963.79 PE=3 SV=1	1	9	1	1	31	7	7	9	8	1	1	1	1	1	1	1	1	27.3	3.6	3.6	41057	362	362	1	19	0.0021668	21162	By matching	By MS/MS	By matching	By matching	By MS/MS	By MS/MS	21.3	21.3	16.3	18.2	27.3	23.8	671350000	96414000	170330000	108230000	152380000
tr|Q4CRB4|Q4CRB4_TRYCC	tr|Q4CRB4|Q4CRB4_TRYCC	8	2	2	>tr|Q4CRB4|Q4CRB4_TRYCC Uncharacterized protein OS=Trypanosoma cruzi (strain CL Brener) GN=Tc00.1047053511901.30 PE=4 SV=1	1	8	2	2	31	7	8	8	8	2	2	2	2	2	2	2	2	31.8	3.2	3.2	39804	346	346	1	28	0	3622	By MS/MS	By MS/MS	By MS/MS	By MS/MS	By MS/MS	By MS/MS	28.6	31.8	27.7	28.6	31.8	31.8	795650000	120510000	196640000	89258000	203530000
tr|Q4CNH7|Q4CNH7_TRYCC	tr|Q4CNH7|Q4CNH7_TRYCC	9	4	4	>tr|Q4CNH7|Q4CNH7_TRYCC Importin subunit alpha OS=Trypanosoma cruzi (strain CL Brener) GN=Tc00.1047053509057.20 PE=3 SV=1	1	9	4	4	31	8	7	8	8	3	3	4	4	3	3	4	4	25.1	10.9	10.9	58071	533	533	1	38	0	17339	By MS/MS	By MS/MS	By MS/MS	By MS/MS	By MS/MS	By MS/MS	21	18.4	18.6	18.8	23.6	23.3	1139300000	193620000	143720000	238680000	417180000
tr|Q4CT78|Q4CT78_TRYCC;tr|Q4CN20|Q4CN20_TRYCC	tr|Q4CT78|Q4CT78_TRYCC	10;4	6;4	6;4	>tr|Q4CT78|Q4CT78_TRYCC Fatty acyl CoA synthetase 2, putative OS=Trypanosoma cruzi (strain CL Brener) GN=Tc00.1047053504177.20 PE=4 SV=1	2	10	6	6	31	6	7	9	9	4	4	5	5	4	4	5	5	18	12.7	12.7	78566	701	701;380	1	46	0	32447	By MS/MS	By MS/MS	By MS/MS	By MS/MS	By MS/MS	By MS/MS	10.4	13.7	15.4	13.1	16.3	15.3	757850000	106700000	169910000	102370000	189300000
tr|Q4CU87|Q4CU87_TRYCC	tr|Q4CU87|Q4CU87_TRYCC	12	3	3	>tr|Q4CU87|Q4CU87_TRYCC Uncharacterized protein OS=Trypanosoma cruzi (strain CL Brener) GN=Tc00.1047053511319.20 PE=4 SV=1	1	12	3	3	31	7	4	10	10	2	0	2	1	2	0	2	1	19	5	5	107.93	975	975	1	13	0	44941	By MS/MS	By matching	By MS/MS	By MS/MS	By MS/MS	By MS/MS	13.5	5.1	9.1	9.5	17.1	15.8	218650000	102010000	0	37096000	57286000
tr|Q4DQV0|Q4DQV0_TRYCC	tr|Q4DQV0|Q4DQV0_TRYCC	8	1	1	>tr|Q4DQV0|Q4DQV0_TRYCC Phosphoglucomutase, putative OS=Trypanosoma cruzi (strain CL Brener) GN=Tc00.1047053511911.130 PE=3 SV=1	1	8	1	1	31	7	8	8	8	1	1	1	1	1	1	1	1	17.8	2	2	65856	600	600	1	11	0.0031458	1906	By matching	By MS/MS	By MS/MS	By MS/MS	By MS/MS	By MS/MS	16.3	17.8	14.3	17.8	17.8	17.8	196860000	18865000	61811000	27964000	26285000
tr|Q4E2I6|Q4E2I6_TRYCC	tr|Q4E2I6|Q4E2I6_TRYCC	9	9	9	>tr|Q4E2I6|Q4E2I6_TRYCC Succinate--CoA ligase [ADP-forming] subunit alpha, mitochondrial OS=Trypanosoma cruzi (strain CL Brener) GN=Tc00.1047053508479.340 PE=3 SV=1	1	9	9	9	30	5	7	9	9	5	7	9	9	5	7	9	9	44.9	44.9	44.9	31797	303	303	1	135	0	323.31	By MS/MS	By MS/MS	By MS/MS	By MS/MS	By MS/MS	By MS/MS	29	41.6	29	29.4	44.9	44.9	27758000000	2046400000	4728200000	7671200000	10113000000
tr|Q4CNG3|Q4CNG3_TRYCC	tr|Q4CNG3|Q4CNG3_TRYCC	9	9	1	>tr|Q4CNG3|Q4CNG3_TRYCC Co-chaperone GrpE, putative OS=Trypanosoma cruzi (strain CL Brener) GN=Tc00.1047053509045.20 PE=3 SV=1	1	9	9	1	30	7	6	8	9	7	6	8	9	1	1	1	1	41.6	41.6	4.6	24364	219	219	1	180	0	246.22	By MS/MS	By MS/MS	By MS/MS	By MS/MS	By MS/MS	By MS/MS	32.9	29.2	32.9	37.9	37.9	41.6	19198000000	3354400000	3963600000	2653800000	4541600000
tr|Q4D7M6|Q4D7M6_TRYCC	tr|Q4D7M6|Q4D7M6_TRYCC	8	8	2	>tr|Q4D7M6|Q4D7M6_TRYCC 3-ketoacyl-CoA thiolase, putative OS=Trypanosoma cruzi (strain CL Brener) GN=Tc00.1047053510507.20 PE=3 SV=1	1	8	8	2	30	8	7	7	8	8	7	7	8	2	1	1	2	27	27	8.2	46283	437	437	1	199	0	323.31	By MS/MS	By MS/MS	By MS/MS	By MS/MS	By MS/MS	By MS/MS	27	24.3	20.1	22.9	24.3	27	21398000000	3542600000	4818900000	3596900000	5673200000
tr|Q4DS82|Q4DS82_TRYCC;tr|Q4DP34|Q4DP34_TRYCC	tr|Q4DS82|Q4DS82_TRYCC;tr|Q4DP34|Q4DP34_TRYCC	10;10	10;10	10;10	>tr|Q4DS82|Q4DS82_TRYCC Reiske iron-sulfur protein, putative OS=Trypanosoma cruzi (strain CL Brener) GN=Tc00.1047053510759.120 PE=4 SV=1;>tr|Q4DP34|Q4DP34_TRYCC Reiske iron-sulfur protein, putative OS=Trypanosoma cruzi (strain CL Brener) GN=Tc00.1047053506	2	10	10	10	30	7	8	9	6	7	8	9	6	7	8	9	6	48.1	48.1	48.1	33729	297	297;297	1	107	0	48225	By MS/MS	By MS/MS	By MS/MS	By MS/MS	By MS/MS	By MS/MS	33.3	37	37	37	43.4	24.9	10366000000	1696600000	1726100000	1413700000	2257400000
tr|Q4E4E1|Q4E4E1_TRYCC	tr|Q4E4E1|Q4E4E1_TRYCC	9	9	9	>tr|Q4E4E1|Q4E4E1_TRYCC Glucokinase 1, putative OS=Trypanosoma cruzi (strain CL Brener) GN=Tc00.1047053510187.100 PE=1 SV=1	1	9	9	9	30	7	6	9	8	7	6	9	8	7	6	9	8	37.8	37.8	37.8	41582	376	376	1	111	0	124.92	By MS/MS	By MS/MS	By MS/MS	By MS/MS	By MS/MS	By MS/MS	26.6	21.3	21.3	21.3	37.8	31.9	11616000000	1700900000	2644300000	1574300000	2307500000
tr|Q4DE83|Q4DE83_TRYCC	tr|Q4DE83|Q4DE83_TRYCC	8	2	2	>tr|Q4DE83|Q4DE83_TRYCC Cysteine peptidase C (CPC), putative OS=Trypanosoma cruzi (strain CL Brener) GN=Tc00.1047053510535.100 PE=3 SV=1	1	8	2	2	30	7	8	8	7	2	2	2	2	2	2	2	2	32.4	9	9	36729	333	333	1	31	0	64986	By MS/MS	By MS/MS	By MS/MS	By MS/MS	By MS/MS	By MS/MS	26.4	32.4	24.3	30	32.4	26.4	6232300000	1327600000	1457100000	595140000	1212300000
tr|Q4DVZ8|Q4DVZ8_TRYCC	tr|Q4DVZ8|Q4DVZ8_TRYCC	9	9	4	>tr|Q4DVZ8|Q4DVZ8_TRYCC Uncharacterized protein OS=Trypanosoma cruzi (strain CL Brener) GN=Tc00.1047053506289.40 PE=4 SV=1	1	9	9	4	30	8	7	6	9	8	7	6	9	3	3	2	4	35.2	35.2	14.6	37972	335	335	1	104	0	116.16	By MS/MS	By MS/MS	By MS/MS	By MS/MS	By MS/MS	By MS/MS	34.3	28.1	34.3	24.8	28.4	35.2	5709600000	1243100000	1340600000	666790000	1260700000
tr|Q4DPI6|Q4DPI6_TRYCC	tr|Q4DPI6|Q4DPI6_TRYCC	11	11	7	>tr|Q4DPI6|Q4DPI6_TRYCC Peptidase T, putative OS=Trypanosoma cruzi (strain CL Brener) GN=Tc00.1047053506513.110 PE=4 SV=1	1	11	11	7	30	7	6	8	9	7	6	8	9	4	4	4	5	37.9	37.9	21.5	46474	419	419	1	128	0	323.31	By MS/MS	By MS/MS	By MS/MS	By MS/MS	By MS/MS	By MS/MS	26.7	22	31.5	25.1	30.8	31.7	9305900000	1233500000	1882400000	1609700000	2197400000
tr|Q4DFM3|Q4DFM3_TRYCC;tr|Q4CXZ8|Q4CXZ8_TRYCC	tr|Q4DFM3|Q4DFM3_TRYCC;tr|Q4CXZ8|Q4CXZ8_TRYCC	9;9	9;9	9;9	>tr|Q4DFM3|Q4DFM3_TRYCC Farnesyl pyrophosphate synthase, putative (Fragment) OS=Trypanosoma cruzi (strain CL Brener) GN=Tc00.1047053508323.9 PE=3 SV=1;>tr|Q4CXZ8|Q4CXZ8_TRYCC Farnesyl pyrophosphate synthase, putative OS=Trypanosoma cruzi (strain CL Brener)	2	9	9	9	30	7	5	9	9	7	5	9	9	7	5	9	9	37	37	37	39302	346	346;425	1	95	0	76319	By MS/MS	By MS/MS	By MS/MS	By MS/MS	By MS/MS	By MS/MS	25.1	19.4	19.4	22	37	37	5740500000	992780000	1322300000	968990000	1393200000
tr|Q4DW67|Q4DW67_TRYCC	tr|Q4DW67|Q4DW67_TRYCC	9	9	2	>tr|Q4DW67|Q4DW67_TRYCC Uncharacterized protein OS=Trypanosoma cruzi (strain CL Brener) GN=Tc00.1047053508231.40 PE=4 SV=1	1	9	9	2	30	7	8	7	8	7	8	7	8	1	1	1	2	40.7	40.7	8.5	29378	258	258	1	84	0	46067	By MS/MS	By MS/MS	By MS/MS	By MS/MS	By MS/MS	By MS/MS	31.4	35.7	31.4	22.9	31.4	36.4	5907000000	1094900000	1260200000	852380000	1520000000
tr|Q4DKC8|Q4DKC8_TRYCC	tr|Q4DKC8|Q4DKC8_TRYCC	9	9	1	>tr|Q4DKC8|Q4DKC8_TRYCC Chaperone DnaJ protein, putative OS=Trypanosoma cruzi (strain CL Brener) GN=Tc00.1047053506355.50 PE=4 SV=1	1	9	9	1	30	6	6	9	9	6	6	9	9	0	0	1	1	26.1	26.1	7.4	38442	353	353	1	111	0	76542	By MS/MS	By MS/MS	By MS/MS	By MS/MS	By MS/MS	By MS/MS	8.2	8.2	11.9	8.2	26.1	26.1	6054700000	835260000	1286300000	1001600000	1870400000
tr|Q4DXJ7|Q4DXJ7_TRYCC	tr|Q4DXJ7|Q4DXJ7_TRYCC	9	9	2	>tr|Q4DXJ7|Q4DXJ7_TRYCC Uncharacterized protein OS=Trypanosoma cruzi (strain CL Brener) GN=Tc00.1047053506195.290 PE=4 SV=1	1	9	9	2	30	6	7	9	8	6	7	9	8	2	2	2	2	24.3	24.3	6.8	48371	424	424	1	99	0	116.08	By MS/MS	By MS/MS	By MS/MS	By MS/MS	By MS/MS	By MS/MS	20.5	20.8	22.4	22.2	24.3	24.1	9708800000	1281800000	1927300000	1296000000	1498600000
tr|Q4CUG4|Q4CUG4_TRYCC	tr|Q4CUG4|Q4CUG4_TRYCC	8	8	8	>tr|Q4CUG4|Q4CUG4_TRYCC Uncharacterized protein OS=Trypanosoma cruzi (strain CL Brener) GN=Tc00.1047053508689.20 PE=4 SV=1	1	8	8	8	30	7	8	8	7	7	8	8	7	7	8	8	7	30.8	30.8	30.8	31571	273	273	1	94	0	81137	By MS/MS	By MS/MS	By MS/MS	By MS/MS	By MS/MS	By MS/MS	30.4	30.8	30.4	30.4	30.8	30.4	4595000000	737290000	900390000	908940000	1181000000
tr|Q4DPG9|Q4DPG9_TRYCC;tr|Q4DDT6|Q4DDT6_TRYCC	tr|Q4DPG9|Q4DPG9_TRYCC;tr|Q4DDT6|Q4DDT6_TRYCC	9;9	9;9	9;9	>tr|Q4DPG9|Q4DPG9_TRYCC Serine/threonine protein kinase, putative OS=Trypanosoma cruzi (strain CL Brener) GN=Tc00.1047053510861.140 PE=3 SV=1;>tr|Q4DDT6|Q4DDT6_TRYCC Serine/threonine protein kinase, putative OS=Trypanosoma cruzi (strain CL Brener) GN=Tc00.	2	9	9	9	30	6	7	8	9	6	7	8	9	6	7	8	9	36.4	36.4	36.4	33.89	297	297;297	1	74	0	23.48	By MS/MS	By MS/MS	By MS/MS	By MS/MS	By MS/MS	By MS/MS	19.5	23.2	23.2	14.1	30.6	36.4	4406000000	707970000	827440000	793830000	1031600000
tr|Q4DTD8|Q4DTD8_TRYCC	tr|Q4DTD8|Q4DTD8_TRYCC	10	10	4	>tr|Q4DTD8|Q4DTD8_TRYCC Heat shock protein-like protein, putative OS=Trypanosoma cruzi (strain CL Brener) GN=Tc00.1047053509157.80 PE=4 SV=1	1	10	10	4	30	7	8	8	7	7	8	8	7	3	2	2	2	47.3	47.3	21.6	35814	319	319	1	109	0	147.93	By MS/MS	By MS/MS	By MS/MS	By MS/MS	By MS/MS	By MS/MS	35.1	37.9	37.9	31	37.9	35.1	4595600000	496030000	1222800000	782140000	907160000
tr|Q4DMI1|Q4DMI1_TRYCC	tr|Q4DMI1|Q4DMI1_TRYCC	8	3	3	>tr|Q4DMI1|Q4DMI1_TRYCC Uncharacterized protein OS=Trypanosoma cruzi (strain CL Brener) GN=Tc00.1047053508881.50 PE=4 SV=1	1	8	3	3	30	8	7	7	8	3	3	3	3	3	3	3	3	34.3	13.7	13.7	37873	335	335	1	49	0	36756	By MS/MS	By MS/MS	By MS/MS	By MS/MS	By MS/MS	By MS/MS	34.3	28.1	34.3	28.1	31.6	34.3	3073300000	576980000	742170000	259440000	560030000
tr|Q4D3A9|Q4D3A9_TRYCC	tr|Q4D3A9|Q4D3A9_TRYCC	9	9	1	>tr|Q4D3A9|Q4D3A9_TRYCC RNA-binding protein, putative OS=Trypanosoma cruzi (strain CL Brener) GN=Tc00.1047053508413.50 PE=4 SV=1	1	9	9	1	30	6	8	8	8	6	8	8	8	0	1	0	0	47.8	47.8	8.3	31096	276	276	1	86	0	18208	By MS/MS	By MS/MS	By MS/MS	By MS/MS	By MS/MS	By MS/MS	29	40.6	19.9	24.6	39.5	39.5	3702200000	514770000	658860000	665650000	1258100000
tr|Q4CSP6|Q4CSP6_TRYCC	tr|Q4CSP6|Q4CSP6_TRYCC	8	3	3	>tr|Q4CSP6|Q4CSP6_TRYCC Aminopeptidase P, putative (Fragment) OS=Trypanosoma cruzi (strain CL Brener) GN=Tc00.1047053510751.4 PE=3 SV=1	1	8	3	3	30	8	7	7	8	3	2	3	3	3	2	3	3	27.7	11.1	11.1	44469	397	397	1	28	0	15907	By MS/MS	By MS/MS	By MS/MS	By MS/MS	By MS/MS	By MS/MS	27.7	22.4	17.9	27.7	25.7	27.7	2863100000	484570000	695840000	573600000	836380000
tr|Q4D1S0|Q4D1S0_TRYCC	tr|Q4D1S0|Q4D1S0_TRYCC	11	11	1	>tr|Q4D1S0|Q4D1S0_TRYCC Vacuolar ATP synthase subunit B, putative OS=Trypanosoma cruzi (strain CL Brener) GN=Tc00.1047053506025.50 PE=3 SV=1	1	11	11	1	30	5	6	9	10	5	6	9	10	1	1	1	1	34.1	34.1	1.8	55553	496	496	1	135	0	103.25	By MS/MS	By MS/MS	By MS/MS	By MS/MS	By MS/MS	By MS/MS	13.7	16.9	13.7	13.9	28.2	30.8	5138800000	965910000	897710000	972680000	1080300000
tr|Q4D2C9|Q4D2C9_TRYCC;tr|Q4CQU4|Q4CQU4_TRYCC;tr|Q4CKD8|Q4CKD8_TRYCC	tr|Q4D2C9|Q4D2C9_TRYCC	8;2;1	8;2;1	8;2;1	>tr|Q4D2C9|Q4D2C9_TRYCC Oligosaccharyl transferase subunit, putative OS=Trypanosoma cruzi (strain CL Brener) GN=Tc00.1047053505163.80 PE=4 SV=1	3	8	8	8	30	7	7	8	8	7	7	8	8	7	7	8	8	14.2	14.2	14.2	90585	798	798;166;153	1	114	0	76101	By MS/MS	By MS/MS	By MS/MS	By MS/MS	By MS/MS	By MS/MS	13.2	13.2	13.2	13.2	14.2	14.2	5906400000	1046800000	1405100000	764410000	1440000000
tr|Q4CQ88|Q4CQ88_TRYCC	tr|Q4CQ88|Q4CQ88_TRYCC	8	3	3	>tr|Q4CQ88|Q4CQ88_TRYCC Uncharacterized protein OS=Trypanosoma cruzi (strain CL Brener) GN=Tc00.1047053506553.20 PE=4 SV=1	1	8	3	3	30	7	7	8	8	2	2	3	3	2	2	3	3	29	13.4	13.4	25.88	231	231	1	33	0	45182	By MS/MS	By MS/MS	By MS/MS	By MS/MS	By MS/MS	By MS/MS	26	26	26	29	29	29	1270400000	246850000	257070000	295770000	273230000
tr|Q4CPP0|Q4CPP0_TRYCC	tr|Q4CPP0|Q4CPP0_TRYCC	9	1	1	>tr|Q4CPP0|Q4CPP0_TRYCC Co-chaperone GrpE, putative OS=Trypanosoma cruzi (strain CL Brener) GN=Tc00.1047053507929.20 PE=3 SV=1	1	9	1	1	30	7	6	8	9	1	1	1	1	1	1	1	1	41.6	4.6	4.6	24306	219	219	1	12	0	37527	By MS/MS	By MS/MS	By MS/MS	By MS/MS	By MS/MS	By MS/MS	32.9	29.2	32.9	37.9	37.9	41.6	1634500000	286810000	385750000	163720000	314560000
tr|Q4DWM7|Q4DWM7_TRYCC	tr|Q4DWM7|Q4DWM7_TRYCC	9	9	1	>tr|Q4DWM7|Q4DWM7_TRYCC Uncharacterized protein OS=Trypanosoma cruzi (strain CL Brener) GN=Tc00.1047053507089.170 PE=4 SV=1	1	9	9	1	30	7	8	7	8	7	8	7	8	1	1	1	1	16.4	16.4	1.9	66.61	587	587	1	80	0	12486	By MS/MS	By MS/MS	By MS/MS	By MS/MS	By MS/MS	By MS/MS	11.4	13.8	13.8	13.8	11.9	14.5	2422100000	358280000	533490000	356180000	555960000
tr|Q4E0R0|Q4E0R0_TRYCC;tr|Q4E3N6|Q4E3N6_TRYCC	tr|Q4E0R0|Q4E0R0_TRYCC;tr|Q4E3N6|Q4E3N6_TRYCC	11;10	11;10	11;10	>tr|Q4E0R0|Q4E0R0_TRYCC Uncharacterized protein OS=Trypanosoma cruzi (strain CL Brener) GN=Tc00.1047053506297.80 PE=4 SV=1;>tr|Q4E3N6|Q4E3N6_TRYCC Uncharacterized protein OS=Trypanosoma cruzi (strain CL Brener) GN=Tc00.1047053510101.250 PE=4 SV=1	2	11	11	11	30	6	7	9	8	6	7	9	8	6	7	9	8	18.7	18.7	18.7	96059	868	868;869	1	77	0	111.33	By MS/MS	By MS/MS	By MS/MS	By MS/MS	By MS/MS	By MS/MS	10	11.4	10.1	10	15.1	14.1	2236800000	370390000	598640000	517680000	543850000
tr|Q4E686|Q4E686_TRYCC;tr|Q4CPW3|Q4CPW3_TRYCC	tr|Q4E686|Q4E686_TRYCC;tr|Q4CPW3|Q4CPW3_TRYCC	10;5	10;5	8;5	>tr|Q4E686|Q4E686_TRYCC Aminopeptidase OS=Trypanosoma cruzi (strain CL Brener) GN=Tc00.1047053508153.60 PE=3 SV=1;>tr|Q4CPW3|Q4CPW3_TRYCC Aminopeptidase, putative (Fragment) OS=Trypanosoma cruzi (strain CL Brener) GN=Tc00.1047053503671.10 PE=4 SV=1	2	10	10	8	30	7	6	8	9	7	6	8	9	7	4	6	7	14.1	14.1	10.4	97079	867	867;242	1	97	0	58153	By MS/MS	By MS/MS	By MS/MS	By MS/MS	By MS/MS	By MS/MS	9	9.6	10.3	9.2	12	13	3587700000	396420000	709000000	647180000	1221700000
tr|Q4DX95|Q4DX95_TRYCC;tr|Q4DGP7|Q4DGP7_TRYCC	tr|Q4DX95|Q4DX95_TRYCC;tr|Q4DGP7|Q4DGP7_TRYCC	11;11	11;11	11;11	>tr|Q4DX95|Q4DX95_TRYCC CAS/CSE/importin domain protein, putative OS=Trypanosoma cruzi (strain CL Brener) GN=Tc00.1047053506945.30 PE=4 SV=1;>tr|Q4DGP7|Q4DGP7_TRYCC CAS/CSE/importin domain protein, putative OS=Trypanosoma cruzi (strain CL Brener) GN=Tc00.1	2	11	11	11	30	7	7	7	9	7	7	7	9	7	7	7	9	17.3	17.3	17.3	107.46	960	960;960	1	74	0	32297	By MS/MS	By MS/MS	By MS/MS	By MS/MS	By MS/MS	By MS/MS	9.8	9.8	6.6	7.3	9.8	14.4	2469000000	483710000	628110000	374860000	658850000
tr|Q4D9Z1|Q4D9Z1_TRYCC	tr|Q4D9Z1|Q4D9Z1_TRYCC	10	10	10	>tr|Q4D9Z1|Q4D9Z1_TRYCC Proteasome regulatory non-ATPase subunit, putative OS=Trypanosoma cruzi (strain CL Brener) GN=Tc00.1047053511365.70 PE=4 SV=1	1	10	10	10	30	6	7	8	9	6	7	8	9	6	7	8	9	31.8	31.8	31.8	45513	402	402	1	82	0	62878	By MS/MS	By MS/MS	By MS/MS	By MS/MS	By MS/MS	By MS/MS	18.9	20.4	18.9	13.9	25.4	29.6	2031700000	156890000	337180000	635280000	733890000
tr|Q4CYD2|Q4CYD2_TRYCC;tr|Q4CUA4|Q4CUA4_TRYCC	tr|Q4CYD2|Q4CYD2_TRYCC;tr|Q4CUA4|Q4CUA4_TRYCC	12;12	12;12	12;12	>tr|Q4CYD2|Q4CYD2_TRYCC Nucleolar RNA helicase II, putative OS=Trypanosoma cruzi (strain CL Brener) GN=Tc00.1047053506123.40 PE=4 SV=1;>tr|Q4CUA4|Q4CUA4_TRYCC Nucleolar RNA helicase II, putative OS=Trypanosoma cruzi (strain CL Brener) GN=Tc00.1047053508205	2	12	12	12	30	5	5	9	11	5	5	9	11	5	5	9	11	21	21	21	69148	633	633;660	1	76	0	183.06	By MS/MS	By MS/MS	By MS/MS	By matching	By MS/MS	By MS/MS	11.7	11.7	2.5	4.3	16.7	21	3287800000	299090000	268410000	857910000	1804200000
tr|Q4DEX4|Q4DEX4_TRYCC	tr|Q4DEX4|Q4DEX4_TRYCC	11	4	4	>tr|Q4DEX4|Q4DEX4_TRYCC Cytosolic leucyl aminopeptidase, putative OS=Trypanosoma cruzi (strain CL Brener) GN=Tc00.1047053510515.60 PE=4 SV=1	1	11	4	4	30	7	6	8	9	2	1	1	2	2	1	1	2	31.8	15.1	15.1	62268	584	584	1	14	0	60806	By MS/MS	By MS/MS	By MS/MS	By MS/MS	By MS/MS	By MS/MS	24.1	17	18.2	18.8	21.4	23.5	438300000	121520000	105320000	19578000	90316000
tr|Q4E0M5|Q4E0M5_TRYCC	tr|Q4E0M5|Q4E0M5_TRYCC	10	3	3	>tr|Q4E0M5|Q4E0M5_TRYCC Retrotransposon hot spot (RHS) protein, putative (Fragment) OS=Trypanosoma cruzi (strain CL Brener) GN=Tc00.1047053509429.4 PE=4 SV=1	1	10	3	3	30	6	7	10	7	1	1	3	1	1	1	3	1	13	5.2	5.2	100.51	871	871	1	17	0	17182	By matching	By matching	By MS/MS	By MS/MS	By MS/MS	By MS/MS	7.1	8.3	9	5.6	13	9.9	868070000	220550000	124890000	161760000	52935000
tr|Q4D9V7|Q4D9V7_TRYCC	tr|Q4D9V7|Q4D9V7_TRYCC	9	3	3	>tr|Q4D9V7|Q4D9V7_TRYCC Uncharacterized protein OS=Trypanosoma cruzi (strain CL Brener) GN=Tc00.1047053506681.40 PE=4 SV=1	1	9	3	3	30	8	7	8	7	3	2	2	2	3	2	2	2	21.9	9.9	9.9	58229	515	515	1	27	0	33	By MS/MS	By MS/MS	By MS/MS	By MS/MS	By MS/MS	By MS/MS	20	14.6	20	14.6	16.5	14.8	483290000	90124000	116360000	53944000	90256000
tr|Q4DTR0|Q4DTR0_TRYCC	tr|Q4DTR0|Q4DTR0_TRYCC	11	11	11	>tr|Q4DTR0|Q4DTR0_TRYCC Uncharacterized protein OS=Trypanosoma cruzi (strain CL Brener) GN=Tc00.1047053509695.90 PE=4 SV=1	1	11	11	11	30	7	7	9	7	7	7	9	7	7	7	9	7	8.9	8.9	8.9	197.11	1747	1747	1	67	0	15271	By MS/MS	By MS/MS	By MS/MS	By MS/MS	By MS/MS	By MS/MS	5	5	2.6	3.8	7.4	5.8	1623500000	322930000	378390000	242100000	380120000
tr|Q4CT34|Q4CT34_TRYCC	tr|Q4CT34|Q4CT34_TRYCC	11	1	1	>tr|Q4CT34|Q4CT34_TRYCC Uncharacterized protein OS=Trypanosoma cruzi (strain CL Brener) GN=Tc00.1047053504575.20 PE=4 SV=1	1	11	1	1	30	6	5	10	9	0	1	0	1	0	1	0	1	32.3	6.4	6.4	65492	575	575	1	7	0	46404	By matching	By matching	By MS/MS	By MS/MS	By matching	By MS/MS	14.8	13.7	21.2	21.2	25.9	28.3	179270000	0	33899000	0	61586000
tr|Q4CYL2|Q4CYL2_TRYCC	tr|Q4CYL2|Q4CYL2_TRYCC	9	1	1	>tr|Q4CYL2|Q4CYL2_TRYCC Mitotubule-associated protein Gb4, putative (Fragment) OS=Trypanosoma cruzi (strain CL Brener) GN=Tc00.1047053504423.40 PE=4 SV=1	1	9	1	1	30	9	8	7	6	1	1	1	1	1	1	1	1	32	3	3	73363	643	643	1	10	0.002808	19318	By MS/MS	By MS/MS	By matching	By MS/MS	By matching	By matching	32	28	32	32	23.3	20.8	236060000	55936000	30475000	43478000	68640000
tr|Q4D480|Q4D480_TRYCC	tr|Q4D480|Q4D480_TRYCC	8	8	3	>tr|Q4D480|Q4D480_TRYCC Cytochrome c, putative OS=Trypanosoma cruzi (strain CL Brener) GN=Tc00.1047053506949.50 PE=3 SV=1	1	8	8	3	29	7	8	8	6	7	8	8	6	2	3	3	2	71.9	71.9	30.7	12234	114	114	1	126	0	83.03	By MS/MS	By MS/MS	By MS/MS	By MS/MS	By MS/MS	By MS/MS	71.9	71.9	71.9	63.2	71.9	63.2	10958000000	1560800000	2579500000	1909000000	3066900000
tr|Q4D7Y8|Q4D7Y8_TRYCC;tr|Q4CQM4|Q4CQM4_TRYCC	tr|Q4D7Y8|Q4D7Y8_TRYCC;tr|Q4CQM4|Q4CQM4_TRYCC	8;8	8;8	8;8	>tr|Q4D7Y8|Q4D7Y8_TRYCC ADP-ribosylation factor 1, putative OS=Trypanosoma cruzi (strain CL Brener) GN=Tc00.1047053508415.40 PE=3 SV=1;>tr|Q4CQM4|Q4CQM4_TRYCC ADP-ribosylation factor 1, putative OS=Trypanosoma cruzi (strain CL Brener) GN=Tc00.1047053508415	2	8	8	8	29	7	7	8	7	7	7	8	7	7	7	8	7	54.9	54.9	54.9	20677	182	182;182	1	100	0	49307	By MS/MS	By MS/MS	By MS/MS	By MS/MS	By MS/MS	By MS/MS	45.1	45.1	39.6	45.1	54.9	45.1	11343000000	1726100000	2359400000	1653700000	3061600000
tr|Q4E4S1|Q4E4S1_TRYCC	tr|Q4E4S1|Q4E4S1_TRYCC	8	8	8	>tr|Q4E4S1|Q4E4S1_TRYCC Calmodulin, putative OS=Trypanosoma cruzi (strain CL Brener) GN=Tc00.1047053508461.380 PE=4 SV=1	1	8	8	8	29	8	6	8	7	8	6	8	7	8	6	8	7	63.2	63.2	63.2	17652	155	155	1	114	0	74767	By MS/MS	By MS/MS	By MS/MS	By MS/MS	By MS/MS	By MS/MS	63.2	49	42.6	49	63.2	49	6424900000	1211200000	1535400000	920390000	1238600000
tr|Q4DT61|Q4DT61_TRYCC	tr|Q4DT61|Q4DT61_TRYCC	11	11	3	>tr|Q4DT61|Q4DT61_TRYCC RNA-binding protein, putative OS=Trypanosoma cruzi (strain CL Brener) GN=Tc00.1047053511621.50 PE=4 SV=1	1	11	11	3	29	6	7	9	7	6	7	9	7	0	1	3	1	30.5	30.5	10.2	48.75	413	413	1	101	0	137.1	By MS/MS	By MS/MS	By MS/MS	By MS/MS	By MS/MS	By MS/MS	16.9	19.9	15	16.7	25.9	20.8	11705000000	1603100000	1872500000	2316600000	3903500000
tr|Q4D4C9|Q4D4C9_TRYCC	tr|Q4D4C9|Q4D4C9_TRYCC	9	9	1	>tr|Q4D4C9|Q4D4C9_TRYCC 3-hydroxy-3-methylglutaryl coenzyme A reductase OS=Trypanosoma cruzi (strain CL Brener) GN=Tc00.1047053506831.40 PE=3 SV=1	1	9	9	1	29	6	6	8	9	6	6	8	9	1	1	1	1	29.2	29.2	4.1	46113	435	435	1	108	0	220.99	By MS/MS	By MS/MS	By MS/MS	By MS/MS	By MS/MS	By MS/MS	17	17	17	17	26.9	29.2	7770900000	1377600000	1629900000	1310300000	2105700000
tr|Q4DS86|Q4DS86_TRYCC;tr|Q4DP30|Q4DP30_TRYCC	tr|Q4DS86|Q4DS86_TRYCC;tr|Q4DP30|Q4DP30_TRYCC	8;7	8;7	8;7	>tr|Q4DS86|Q4DS86_TRYCC Uncharacterized protein OS=Trypanosoma cruzi (strain CL Brener) GN=Tc00.1047053510759.80 PE=4 SV=1;>tr|Q4DP30|Q4DP30_TRYCC Uncharacterized protein OS=Trypanosoma cruzi (strain CL Brener) GN=Tc00.1047053506999.130 PE=4 SV=1	2	8	8	8	29	8	7	8	6	8	7	8	6	8	7	8	6	35.1	35.1	35.1	34079	305	305;305	1	80	0	21194	By MS/MS	By MS/MS	By MS/MS	By MS/MS	By MS/MS	By MS/MS	35.1	28.9	28.9	27.5	35.1	30.5	2592100000	407310000	533090000	414360000	608170000
tr|Q4DYH7|Q4DYH7_TRYCC	tr|Q4DYH7|Q4DYH7_TRYCC	8	8	8	>tr|Q4DYH7|Q4DYH7_TRYCC Chaperone DnaJ protein, putative OS=Trypanosoma cruzi (strain CL Brener) GN=Tc00.1047053511367.138 PE=3 SV=1	1	8	8	8	29	6	7	8	8	6	7	8	8	6	7	8	8	29.9	29.9	29.9	46811	421	421	1	97	0	269.57	By MS/MS	By MS/MS	By MS/MS	By MS/MS	By MS/MS	By MS/MS	22.1	27.6	22.1	22.1	29.9	29.9	4594300000	775460000	1001200000	728450000	1099600000
tr|Q4CYG8|Q4CYG8_TRYCC	tr|Q4CYG8|Q4CYG8_TRYCC	9	9	9	>tr|Q4CYG8|Q4CYG8_TRYCC Uncharacterized protein OS=Trypanosoma cruzi (strain CL Brener) GN=Tc00.1047053510817.60 PE=4 SV=1	1	9	9	9	29	7	7	8	7	7	7	8	7	7	7	8	7	40.6	40.6	40.6	37681	330	330	1	83	0	38435	By MS/MS	By MS/MS	By MS/MS	By MS/MS	By MS/MS	By MS/MS	31.2	24.5	31.2	28.5	37.9	24.8	3214700000	424930000	499930000	649000000	1128400000
tr|Q4DZF8|Q4DZF8_TRYCC	tr|Q4DZF8|Q4DZF8_TRYCC	9	9	3	>tr|Q4DZF8|Q4DZF8_TRYCC Uncharacterized protein OS=Trypanosoma cruzi (strain CL Brener) GN=Tc00.1047053506825.40 PE=4 SV=1	1	9	9	3	29	7	7	8	7	7	7	8	7	2	2	2	2	21.9	21.9	9.9	58156	515	515	1	78	0	50944	By MS/MS	By MS/MS	By MS/MS	By MS/MS	By MS/MS	By MS/MS	14.6	14.6	14.6	20	16.5	14.8	2868100000	574000000	726980000	211880000	441150000
tr|Q4DQQ3|Q4DQQ3_TRYCC;tr|Q4CWQ2|Q4CWQ2_TRYCC	tr|Q4DQQ3|Q4DQQ3_TRYCC	10;1	10;1	6;1	>tr|Q4DQQ3|Q4DQQ3_TRYCC Uncharacterized protein OS=Trypanosoma cruzi (strain CL Brener) GN=Tc00.1047053509167.140 PE=4 SV=1	2	10	10	6	29	6	4	10	9	6	4	10	9	4	4	6	6	39.6	39.6	26.8	41574	381	381;146	1	90	0	214.64	By MS/MS	By MS/MS	By MS/MS	By MS/MS	By MS/MS	By MS/MS	24.7	18.6	20.7	17.6	39.6	37.3	6856300000	345910000	413590000	2032300000	3742600000
tr|Q4E4D5|Q4E4D5_TRYCC	tr|Q4E4D5|Q4E4D5_TRYCC	9	9	9	>tr|Q4E4D5|Q4E4D5_TRYCC Developmentally regulated GTP-binding protein, putative OS=Trypanosoma cruzi (strain CL Brener) GN=Tc00.1047053510187.160 PE=4 SV=1	1	9	9	9	29	6	7	8	8	6	7	8	8	6	7	8	8	28.3	28.3	28.3	41.38	368	368	1	86	0	80.16	By MS/MS	By MS/MS	By MS/MS	By MS/MS	By MS/MS	By MS/MS	19	22.8	17.4	19	24.7	26.6	2286400000	312290000	440250000	371550000	679090000
tr|Q4E1V5|Q4E1V5_TRYCC	tr|Q4E1V5|Q4E1V5_TRYCC	12	12	1	>tr|Q4E1V5|Q4E1V5_TRYCC Uncharacterized protein OS=Trypanosoma cruzi (strain CL Brener) GN=Tc00.1047053507993.260 PE=3 SV=1	1	12	12	1	29	6	7	8	8	6	7	8	8	0	0	0	1	20.4	20.4	2.7	93432	822	822	1	83	0	51824	By MS/MS	By MS/MS	By MS/MS	By MS/MS	By MS/MS	By MS/MS	10.5	12.4	15.2	10.8	14.6	14.6	3472500000	467770000	681600000	727290000	967330000
tr|Q4DQP0|Q4DQP0_TRYCC;tr|Q4CW66|Q4CW66_TRYCC	tr|Q4DQP0|Q4DQP0_TRYCC;tr|Q4CW66|Q4CW66_TRYCC	10;5	10;5	10;5	>tr|Q4DQP0|Q4DQP0_TRYCC Uncharacterized protein OS=Trypanosoma cruzi (strain CL Brener) GN=Tc00.1047053506563.100 PE=3 SV=1;>tr|Q4CW66|Q4CW66_TRYCC Uncharacterized protein OS=Trypanosoma cruzi (strain CL Brener) GN=Tc00.1047053509003.10 PE=3 SV=1	2	10	10	10	29	6	5	8	10	6	5	8	10	6	5	8	10	41.4	41.4	41.4	34.27	307	307;307	1	67	0	323.31	By MS/MS	By MS/MS	By MS/MS	By matching	By MS/MS	By MS/MS	24.1	24.1	2.9	2.9	36.8	41.4	2257100000	219100000	306150000	667110000	989460000
tr|Q4D6B1|Q4D6B1_TRYCC	tr|Q4D6B1|Q4D6B1_TRYCC	8	1	1	>tr|Q4D6B1|Q4D6B1_TRYCC Uncharacterized protein OS=Trypanosoma cruzi (strain CL Brener) GN=Tc00.1047053508269.40 PE=4 SV=1	1	8	1	1	29	7	7	7	8	1	1	1	1	1	1	1	1	23.1	3.4	3.4	43.09	351	351	1	24	0.0037112	1694	By MS/MS	By MS/MS	By MS/MS	By MS/MS	By MS/MS	By MS/MS	19.4	20.2	14	14	19.9	23.1	878380000	181400000	203360000	77583000	148970000
tr|Q4DBX3|Q4DBX3_TRYCC	tr|Q4DBX3|Q4DBX3_TRYCC	10	10	10	>tr|Q4DBX3|Q4DBX3_TRYCC Uncharacterized protein OS=Trypanosoma cruzi (strain CL Brener) GN=Tc00.1047053504103.20 PE=4 SV=1	1	10	10	10	29	6	6	7	10	6	6	7	10	6	6	7	10	14.3	14.3	14.3	109.8	1005	1005	1	84	0	25553	By MS/MS	By MS/MS	By MS/MS	By MS/MS	By MS/MS	By MS/MS	8.4	8.8	9.5	8	11.4	14.3	1755700000	231820000	320370000	265530000	575320000
tr|Q4DHG5|Q4DHG5_TRYCC;tr|Q4E0W1|Q4E0W1_TRYCC;REV__tr|Q4E2R5|Q4E2R5_TRYCC	tr|Q4DHG5|Q4DHG5_TRYCC;tr|Q4E0W1|Q4E0W1_TRYCC	11;11;1	11;11;1	11;11;1	>tr|Q4DHG5|Q4DHG5_TRYCC DNA topoisomerase 2 OS=Trypanosoma cruzi (strain CL Brener) GN=Tc00.1047053506445.60 PE=3 SV=1;>tr|Q4E0W1|Q4E0W1_TRYCC DNA topoisomerase 2 OS=Trypanosoma cruzi (strain CL Brener) GN=Tc00.1047053508277.370 PE=3 SV=1	3	11	11	11	29	5	6	8	10	5	6	8	10	5	6	8	10	10.7	10.7	10.7	138.39	1230	1230;1231;538	1	64	0	15133	By MS/MS	By MS/MS	By MS/MS	By MS/MS	By MS/MS	By MS/MS	5	5.7	2.9	1.6	8.6	9.8	1966800000	209320000	410970000	372730000	783630000
tr|Q4D0P4|Q4D0P4_TRYCC;tr|Q4D4R3|Q4D4R3_TRYCC	tr|Q4D0P4|Q4D0P4_TRYCC;tr|Q4D4R3|Q4D4R3_TRYCC	10;9	10;9	10;9	>tr|Q4D0P4|Q4D0P4_TRYCC N-acetyltransferase subunit Nat1, putative OS=Trypanosoma cruzi (strain CL Brener) GN=Tc00.1047053510301.80 PE=4 SV=1;>tr|Q4D4R3|Q4D4R3_TRYCC N-acetyltransferase subunit Nat1, putative OS=Trypanosoma cruzi (strain CL Brener) GN=Tc00	2	10	10	10	29	6	7	8	8	6	7	8	8	6	7	8	8	15.4	15.4	15.4	82559	712	712;712	1	78	0	20681	By MS/MS	By MS/MS	By MS/MS	By MS/MS	By MS/MS	By MS/MS	8.8	10.8	12.6	8.8	12.8	12.6	1201100000	84459000	317610000	271260000	354460000
tr|Q4CRR5|Q4CRR5_TRYCC	tr|Q4CRR5|Q4CRR5_TRYCC	11	7	5	>tr|Q4CRR5|Q4CRR5_TRYCC Retrotransposon hot spot (RHS) protein, putative OS=Trypanosoma cruzi (strain CL Brener) GN=Tc00.1047053508473.10 PE=4 SV=1	1	11	7	5	29	5	5	10	9	3	3	6	6	2	2	4	4	15.6	12.7	11.1	173.29	1503	1503	1	41	0	10395	By MS/MS	By MS/MS	By MS/MS	By MS/MS	By MS/MS	By MS/MS	4.2	3.9	4.3	4.6	14.7	9.3	853090000	107040000	141130000	206410000	300450000
tr|Q4CXR7|Q4CXR7_TRYCC	tr|Q4CXR7|Q4CXR7_TRYCC	11	1	1	>tr|Q4CXR7|Q4CXR7_TRYCC Vacuolar ATP synthase subunit B, putative OS=Trypanosoma cruzi (strain CL Brener) GN=Tc00.1047053511209.10 PE=3 SV=1	1	11	1	1	29	5	5	9	10	1	0	1	1	1	0	1	1	34.1	1.8	1.8	55539	496	496	1	8	1	-2	By matching	By matching	By matching	By matching	By MS/MS	By MS/MS	13.7	15.1	13.7	13.9	28.2	30.8	97743000	32652000	0	21949000	0
tr|Q4D2W4|Q4D2W4_TRYCC	tr|Q4D2W4|Q4D2W4_TRYCC	8	1	1	>tr|Q4D2W4|Q4D2W4_TRYCC 6-phosphogluconate dehydrogenase, decarboxylating, putative (Fragment) OS=Trypanosoma cruzi (strain CL Brener) GN=Tc00.1047053510737.10 PE=4 SV=1	1	8	1	1	29	6	7	8	8	0	1	1	1	0	1	1	1	35.4	4.6	4.6	31086	280	280	1	5	0	25795	By matching	By matching	By matching	By matching	By MS/MS	By MS/MS	26.1	30.7	26.1	22.9	35.4	35.4	158900000	0	20202000	44686000	94010000
tr|Q4CX07|Q4CX07_TRYCC	tr|Q4CX07|Q4CX07_TRYCC	10	2	2	>tr|Q4CX07|Q4CX07_TRYCC ABC transporter, putative OS=Trypanosoma cruzi (strain CL Brener) GN=Tc00.1047053506249.70 PE=4 SV=1	1	10	2	2	29	6	7	7	9	0	1	0	2	0	1	0	2	22.3	5	5	74.62	665	665	1	7	0.0021684	21182	By matching	By MS/MS	By MS/MS	By matching	By matching	By MS/MS	13.8	15.9	15.9	13.7	15.9	20.2	263420000	0	37221000	0	194370000
tr|Q4DE55|Q4DE55_TRYCC;tr|Q4CW23|Q4CW23_TRYCC	tr|Q4DE55|Q4DE55_TRYCC;tr|Q4CW23|Q4CW23_TRYCC	9;9	9;9	9;9	>tr|Q4DE55|Q4DE55_TRYCC Uncharacterized protein OS=Trypanosoma cruzi (strain CL Brener) GN=Tc00.1047053504089.60 PE=4 SV=1;>tr|Q4CW23|Q4CW23_TRYCC Uncharacterized protein OS=Trypanosoma cruzi (strain CL Brener) GN=Tc00.1047053504001.10 PE=4 SV=1	2	9	9	9	28	6	8	7	7	6	8	7	7	6	8	7	7	63.1	63.1	63.1	13496	122	122;122	1	122	0	53449	By MS/MS	By MS/MS	By MS/MS	By MS/MS	By MS/MS	By MS/MS	45.1	59.8	63.1	49.2	53.3	54.9	17582000000	2823100000	3863300000	2646100000	3589200000
tr|Q4E661|Q4E661_TRYCC	tr|Q4E661|Q4E661_TRYCC	9	9	9	>tr|Q4E661|Q4E661_TRYCC 60S ribosomal protein L13 OS=Trypanosoma cruzi (strain CL Brener) GN=Tc00.1047053508153.280 PE=1 SV=1	1	9	9	9	28	5	7	9	7	5	7	9	7	5	7	9	7	34.4	34.4	34.4	25293	218	218	1	73	0	28315	By MS/MS	By MS/MS	By MS/MS	By MS/MS	By MS/MS	By MS/MS	16.1	23.4	15.6	17.4	34.4	23.9	11918000000	1844800000	2597300000	2502700000	3092700000
tr|Q4DUG8|Q4DUG8_TRYCC	tr|Q4DUG8|Q4DUG8_TRYCC	9	9	4	>tr|Q4DUG8|Q4DUG8_TRYCC Cystathione gamma lyase, putative OS=Trypanosoma cruzi (strain CL Brener) GN=Tc00.1047053510661.250 PE=3 SV=1	1	9	9	4	28	5	6	9	8	5	6	9	8	1	2	4	4	25.7	25.7	12	44489	408	408	1	104	0	43722	By MS/MS	By MS/MS	By MS/MS	By MS/MS	By MS/MS	By MS/MS	13.7	13.7	13.7	13.7	25.7	21.8	22342000000	2680900000	3976600000	4025200000	7765400000
tr|Q4D1Q4|Q4D1Q4_TRYCC	tr|Q4D1Q4|Q4D1Q4_TRYCC	10	10	10	>tr|Q4D1Q4|Q4D1Q4_TRYCC Aspartate aminotransferase, mitochondrial, putative OS=Trypanosoma cruzi (strain CL Brener) GN=Tc00.1047053510945.70 PE=4 SV=1	1	10	10	10	28	6	4	8	10	6	4	8	10	6	4	8	10	31.1	31.1	31.1	46042	418	418	1	105	0	99044	By MS/MS	By MS/MS	By MS/MS	By MS/MS	By MS/MS	By MS/MS	20.3	14.6	11.7	19.1	27	31.1	15765000000	2325300000	4070700000	2498900000	4641200000
tr|Q4CWM1|Q4CWM1_TRYCC	tr|Q4CWM1|Q4CWM1_TRYCC	8	8	1	>tr|Q4CWM1|Q4CWM1_TRYCC IgE-dependent histamine-releasing factor, putative OS=Trypanosoma cruzi (strain CL Brener) GN=Tc00.1047053510065.30 PE=3 SV=1	1	8	8	1	28	5	7	8	8	5	7	8	8	1	1	1	1	68.8	68.8	15.9	19673	170	170	1	151	0	87419	By MS/MS	By MS/MS	By MS/MS	By MS/MS	By MS/MS	By MS/MS	56.5	61.8	60.6	61.8	68.8	68.8	7716200000	1196900000	1175300000	1469900000	2437800000
tr|Q4DY32|Q4DY32_TRYCC	tr|Q4DY32|Q4DY32_TRYCC	9	9	1	>tr|Q4DY32|Q4DY32_TRYCC RNA-binding protein, putative OS=Trypanosoma cruzi (strain CL Brener) GN=Tc00.1047053511727.270 PE=4 SV=1	1	9	9	1	28	5	5	9	9	5	5	9	9	1	1	1	1	40.9	40.9	4.7	27619	257	257	1	106	0	43821	By MS/MS	By MS/MS	By MS/MS	By MS/MS	By MS/MS	By MS/MS	21	21.4	16.7	26.1	40.9	40.9	11479000000	1427500000	1577800000	2369000000	4205200000
tr|Q4DND9|Q4DND9_TRYCC;tr|Q4DIS9|Q4DIS9_TRYCC	tr|Q4DND9|Q4DND9_TRYCC;tr|Q4DIS9|Q4DIS9_TRYCC	11;7	11;7	11;7	>tr|Q4DND9|Q4DND9_TRYCC Uncharacterized protein OS=Trypanosoma cruzi (strain CL Brener) GN=Tc00.1047053504827.150 PE=4 SV=1;>tr|Q4DIS9|Q4DIS9_TRYCC Uncharacterized protein OS=Trypanosoma cruzi (strain CL Brener) GN=Tc00.1047053510285.80 PE=4 SV=1	2	11	11	11	28	7	6	8	7	7	6	8	7	7	6	8	7	15.9	15.9	15.9	98623	851	851;851	1	68	0	32258	By MS/MS	By MS/MS	By MS/MS	By MS/MS	By MS/MS	By MS/MS	8.9	8.8	10.5	8.3	12.8	10.7	27080000000	6413500000	3381800000	3344900000	4263000000
tr|Q4DYJ7|Q4DYJ7_TRYCC;tr|Q4DD18|Q4DD18_TRYCC	tr|Q4DYJ7|Q4DYJ7_TRYCC;tr|Q4DD18|Q4DD18_TRYCC	8;7	8;7	8;7	>tr|Q4DYJ7|Q4DYJ7_TRYCC Protein kinase, putative OS=Trypanosoma cruzi (strain CL Brener) GN=Tc00.1047053506211.210 PE=3 SV=1;>tr|Q4DD18|Q4DD18_TRYCC Protein kinase, putative (Fragment) OS=Trypanosoma cruzi (strain CL Brener) GN=Tc00.1047053511289.14 PE=3 S	2	8	8	8	28	7	7	6	8	7	7	6	8	7	7	6	8	31.8	31.8	31.8	30801	280	280;274	1	121	0	140.44	By MS/MS	By MS/MS	By MS/MS	By MS/MS	By MS/MS	By MS/MS	27.1	28.9	25	31.8	25.7	31.8	7568900000	1368100000	1674600000	796900000	1623200000
tr|Q4E1M2|Q4E1M2_TRYCC;tr|Q4DFE7|Q4DFE7_TRYCC	tr|Q4E1M2|Q4E1M2_TRYCC;tr|Q4DFE7|Q4DFE7_TRYCC	8;8	8;8	8;8	>tr|Q4E1M2|Q4E1M2_TRYCC GMP reductase OS=Trypanosoma cruzi (strain CL Brener) GN=GMPR PE=3 SV=1;>tr|Q4DFE7|Q4DFE7_TRYCC GMP reductase OS=Trypanosoma cruzi (strain CL Brener) GN=GMPR PE=3 SV=1	2	8	8	8	28	6	6	8	8	6	6	8	8	6	6	8	8	19.8	19.8	19.8	52194	491	491;491	1	112	0	56757	By MS/MS	By MS/MS	By MS/MS	By MS/MS	By MS/MS	By MS/MS	17.7	17.7	17.7	19.6	19.8	19.8	9367600000	1554800000	1852900000	1567500000	2465100000
tr|Q4CXX4|Q4CXX4_TRYCC	tr|Q4CXX4|Q4CXX4_TRYCC	10	10	10	>tr|Q4CXX4|Q4CXX4_TRYCC S-phase kinase-associated protein, putative OS=Trypanosoma cruzi (strain CL Brener) GN=Tc00.1047053506297.350 PE=3 SV=1	1	10	10	10	28	5	5	9	9	5	5	9	9	5	5	9	9	64.8	64.8	64.8	21228	182	182	1	75	0	103.18	By MS/MS	By MS/MS	By MS/MS	By MS/MS	By MS/MS	By MS/MS	34.1	34.1	39	42.3	59.9	57.7	4039300000	498690000	681180000	776320000	1512700000
tr|Q4E0T1|Q4E0T1_TRYCC	tr|Q4E0T1|Q4E0T1_TRYCC	8	3	3	>tr|Q4E0T1|Q4E0T1_TRYCC p22 protein, putative OS=Trypanosoma cruzi (strain CL Brener) GN=Tc00.1047053509965.290 PE=4 SV=1	1	8	3	3	28	7	7	8	6	3	2	3	2	3	2	3	2	32.9	10.2	10.2	25819	225	225	1	33	0	10801	By MS/MS	By MS/MS	By MS/MS	By MS/MS	By MS/MS	By MS/MS	25.3	32.9	25.3	25.3	32.9	29.8	4119200000	631390000	739520000	614750000	991080000
tr|Q4DCP7|Q4DCP7_TRYCC;tr|Q4DHF8|Q4DHF8_TRYCC	tr|Q4DCP7|Q4DCP7_TRYCC;tr|Q4DHF8|Q4DHF8_TRYCC	9;8	9;8	9;8	>tr|Q4DCP7|Q4DCP7_TRYCC Aldehyde dehydrogenase, putative (Fragment) OS=Trypanosoma cruzi (strain CL Brener) GN=Tc00.1047053506943.4 PE=3 SV=1;>tr|Q4DHF8|Q4DHF8_TRYCC Aldehyde dehydrogenase, putative (Fragment) OS=Trypanosoma cruzi (strain CL Brener) GN=Tc0	2	9	9	9	28	6	5	9	8	6	5	9	8	6	5	9	8	40.6	40.6	40.6	37553	342	342;387	1	80	0	101.14	By MS/MS	By MS/MS	By MS/MS	By MS/MS	By MS/MS	By MS/MS	22.5	19	19	22.2	40.6	37.7	4486400000	700410000	955130000	739260000	1316600000
tr|Q4DA73|Q4DA73_TRYCC;tr|Q4CXJ6|Q4CXJ6_TRYCC;tr|Q4DR69|Q4DR69_TRYCC	tr|Q4DA73|Q4DA73_TRYCC;tr|Q4CXJ6|Q4CXJ6_TRYCC;tr|Q4DR69|Q4DR69_TRYCC	9;9;8	9;9;8	1;1;0	>tr|Q4DA73|Q4DA73_TRYCC Spermidine synthase, putative OS=Trypanosoma cruzi (strain CL Brener) GN=Tc00.1047053510339.50 PE=1 SV=1;>tr|Q4CXJ6|Q4CXJ6_TRYCC Spermidine synthase, putative OS=Trypanosoma cruzi (strain CL Brener) GN=Tc00.1047053510337.40 PE=3 SV=	3	9	9	1	28	6	6	7	9	6	6	7	9	1	1	1	1	40.9	40.9	7.8	33032	296	296;296;296	1	87	0	24646	By MS/MS	By MS/MS	By MS/MS	By MS/MS	By MS/MS	By MS/MS	31.4	31.4	27.4	27.4	33.8	40.9	5368900000	540800000	1076800000	1068000000	1883000000
tr|Q4CKQ6|Q4CKQ6_TRYCC;tr|Q4CLD7|Q4CLD7_TRYCC;tr|Q4CKJ0|Q4CKJ0_TRYCC;tr|Q4CZ39|Q4CZ39_TRYCC;tr|Q4CKJ1|Q4CKJ1_TRYCC	tr|Q4CKQ6|Q4CKQ6_TRYCC;tr|Q4CLD7|Q4CLD7_TRYCC;tr|Q4CKJ0|Q4CKJ0_TRYCC	9;6;5;3;2	9;6;5;3;2	9;6;5;3;2	>tr|Q4CKQ6|Q4CKQ6_TRYCC Fatty acid desaturase, putative OS=Trypanosoma cruzi (strain CL Brener) GN=Tc00.1047053509239.10 PE=4 SV=1;>tr|Q4CLD7|Q4CLD7_TRYCC Fatty acid desaturase, putative (Fragment) OS=Trypanosoma cruzi (strain CL Brener) GN=Tc00.1047053511	5	9	9	9	28	6	6	8	8	6	6	8	8	6	6	8	8	26.3	26.3	26.3	49589	433	433;162;119;255;139	1	58	0	33.43	By MS/MS	By MS/MS	By matching	By MS/MS	By MS/MS	By MS/MS	17.8	17.3	4.8	7.4	23.3	23.3	3875300000	974170000	1141500000	691010000	1030200000
tr|Q4DLS1|Q4DLS1_TRYCC;tr|Q4CKH4|Q4CKH4_TRYCC;tr|Q4DYZ0|Q4DYZ0_TRYCC	tr|Q4DLS1|Q4DLS1_TRYCC	9;2;1	9;2;1	9;2;1	>tr|Q4DLS1|Q4DLS1_TRYCC Bifunctional dihydrofolate reductase-thymidylate synthase OS=Trypanosoma cruzi (strain CL Brener) GN=Tc00.1047053509153.90 PE=1 SV=1	3	9	9	9	28	5	6	8	9	5	6	8	9	5	6	8	9	24.8	24.8	24.8	58853	521	521;71;118	1	109	0	65539	By MS/MS	By MS/MS	By MS/MS	By MS/MS	By MS/MS	By MS/MS	10.6	17.7	10.6	10.6	21.1	24.8	7516400000	1005200000	1191100000	1521600000	2510800000
tr|Q4E620|Q4E620_TRYCC;tr|Q4CV69|Q4CV69_TRYCC	tr|Q4E620|Q4E620_TRYCC;tr|Q4CV69|Q4CV69_TRYCC	9;6	9;6	9;6	>tr|Q4E620|Q4E620_TRYCC Elongation initiation factor 2 alpha subunit, putative OS=Trypanosoma cruzi (strain CL Brener) GN=Tc00.1047053508153.730 PE=4 SV=1;>tr|Q4CV69|Q4CV69_TRYCC Elongation initiation factor 2 alpha subunit, putative (Fragment) OS=Trypanos	2	9	9	9	28	6	6	8	8	6	6	8	8	6	6	8	8	26.8	26.8	26.8	47.63	418	418;200	1	92	0	18716	By MS/MS	By MS/MS	By MS/MS	By MS/MS	By MS/MS	By MS/MS	15.1	15.1	12.4	15.1	24.9	24.9	5235500000	517200000	1167900000	1367000000	1725400000
tr|Q4E0X3|Q4E0X3_TRYCC	tr|Q4E0X3|Q4E0X3_TRYCC	9	9	8	>tr|Q4E0X3|Q4E0X3_TRYCC Nucleolar RNA binding protein, putative OS=Trypanosoma cruzi (strain CL Brener) GN=Tc00.1047053508277.230 PE=4 SV=1	1	9	9	8	28	6	5	8	9	6	5	8	9	6	5	7	8	25	25	22.6	55078	496	496	1	89	0	149.58	By MS/MS	By MS/MS	By MS/MS	By MS/MS	By MS/MS	By MS/MS	18.1	14.3	10.7	18.8	22.6	25	5905000000	838330000	925880000	1237200000	2069100000
tr|Q4D5E4|Q4D5E4_TRYCC;tr|Q4CYK1|Q4CYK1_TRYCC	tr|Q4D5E4|Q4D5E4_TRYCC;tr|Q4CYK1|Q4CYK1_TRYCC	8;8	8;8	8;8	>tr|Q4D5E4|Q4D5E4_TRYCC Acidocalcisomal pyrophosphatase, putative OS=Trypanosoma cruzi (strain CL Brener) GN=Tc00.1047053511165.40 PE=4 SV=1;>tr|Q4CYK1|Q4CYK1_TRYCC Acidocalcisomal pyrophosphatase, putative OS=Trypanosoma cruzi (strain CL Brener) GN=Tc00.1	2	8	8	8	28	7	7	7	7	7	7	7	7	7	7	7	7	23.2	23.2	23.2	47792	414	414;414	1	98	0	11602	By MS/MS	By MS/MS	By MS/MS	By MS/MS	By MS/MS	By MS/MS	21.3	19.8	19.8	17.9	21.3	20.5	2714800000	535770000	507150000	380370000	726400000
tr|Q4DGY4|Q4DGY4_TRYCC;tr|Q4CMX5|Q4CMX5_TRYCC;tr|Q4DBL3|Q4DBL3_TRYCC	tr|Q4DGY4|Q4DGY4_TRYCC	9;3;3	9;3;3	9;3;3	>tr|Q4DGY4|Q4DGY4_TRYCC Uncharacterized protein OS=Trypanosoma cruzi (strain CL Brener) GN=Tc00.1047053509213.40 PE=4 SV=1	3	9	9	9	28	6	6	8	8	6	6	8	8	6	6	8	8	16.4	16.4	16.4	83433	748	748;225;540	1	94	0	42635	By MS/MS	By MS/MS	By MS/MS	By MS/MS	By MS/MS	By MS/MS	9.5	8.7	9.5	11.2	14.6	14.7	3441900000	580140000	811100000	532350000	831490000
tr|Q4CW52|Q4CW52_TRYCC	tr|Q4CW52|Q4CW52_TRYCC	8	1	1	>tr|Q4CW52|Q4CW52_TRYCC IgE-dependent histamine-releasing factor, putative OS=Trypanosoma cruzi (strain CL Brener) GN=Tc00.1047053506207.50 PE=3 SV=1	1	8	1	1	28	5	7	8	8	1	1	1	1	1	1	1	1	68.8	15.9	15.9	19587	170	170	1	19	0.0034471	18218	By MS/MS	By MS/MS	By MS/MS	By MS/MS	By MS/MS	By matching	56.5	61.8	60.6	61.8	68.8	68.8	571510000	201030000	156510000	61286000	34422000
tr|Q4CYP2|Q4CYP2_TRYCC	tr|Q4CYP2|Q4CYP2_TRYCC	7	1	1	>tr|Q4CYP2|Q4CYP2_TRYCC 3-ketoacyl-CoA thiolase, putative OS=Trypanosoma cruzi (strain CL Brener) GN=Tc00.1047053509463.30 PE=3 SV=1	1	7	1	1	28	7	7	7	7	1	1	1	1	1	1	1	1	24.3	5.5	5.5	46405	437	437	1	32	0	22.78	By MS/MS	By MS/MS	By MS/MS	By MS/MS	By MS/MS	By MS/MS	24.3	24.3	20.1	20.1	24.3	24.3	1751300000	408340000	271490000	336320000	434960000
tr|Q4DG60|Q4DG60_TRYCC	tr|Q4DG60|Q4DG60_TRYCC	10	10	4	>tr|Q4DG60|Q4DG60_TRYCC Folate/pteridine transporter, putative OS=Trypanosoma cruzi (strain CL Brener) GN=Tc00.1047053511575.130 PE=4 SV=1	1	10	10	4	28	5	7	8	8	5	7	8	8	2	3	3	3	19.9	19.9	7.3	69638	629	629	1	93	0	26427	By MS/MS	By MS/MS	By MS/MS	By MS/MS	By MS/MS	By MS/MS	9.7	13	18.1	15.7	14.9	14.9	2293800000	228430000	392940000	249450000	648790000
tr|Q4E0B2|Q4E0B2_TRYCC;tr|Q4CML2|Q4CML2_TRYCC	tr|Q4E0B2|Q4E0B2_TRYCC;tr|Q4CML2|Q4CML2_TRYCC	9;5	9;5	7;5	>tr|Q4E0B2|Q4E0B2_TRYCC Glucose-6-phosphate 1-dehydrogenase OS=Trypanosoma cruzi (strain CL Brener) GN=Tc00.1047053509287.50 PE=1 SV=1;>tr|Q4CML2|Q4CML2_TRYCC Glucose-6-phosphate dehydrogenase, putative (Fragment) OS=Trypanosoma cruzi (strain CL Brener) GN	2	9	9	7	28	4	7	9	8	4	7	9	8	3	5	7	6	22.7	22.7	17.5	62917	555	555;279	1	68	0	26888	By MS/MS	By MS/MS	By MS/MS	By MS/MS	By MS/MS	By MS/MS	9.4	18.2	11.2	13.9	22.7	20.9	2504200000	313700000	463240000	460430000	807110000
tr|Q4DQM4|Q4DQM4_TRYCC	tr|Q4DQM4|Q4DQM4_TRYCC	7	2	0	>tr|Q4DQM4|Q4DQM4_TRYCC Protein tyrosine phosphatase, putative OS=Trypanosoma cruzi (strain CL Brener) GN=Tc00.1047053509109.120 PE=4 SV=1	1	7	2	0	28	7	7	7	7	2	2	2	2	0	0	0	0	50.6	7.8	0	19.69	180	180	1	21	0	10651	By MS/MS	By MS/MS	By MS/MS	By MS/MS	By MS/MS	By MS/MS	50.6	50.6	43.3	50.6	50.6	50.6	327550000	69024000	77633000	40445000	112270000
tr|Q4DCY3|Q4DCY3_TRYCC	tr|Q4DCY3|Q4DCY3_TRYCC	11	11	11	>tr|Q4DCY3|Q4DCY3_TRYCC Uncharacterized protein OS=Trypanosoma cruzi (strain CL Brener) GN=Tc00.1047053509895.10 PE=4 SV=1	1	11	11	11	28	6	5	9	8	6	5	9	8	6	5	9	8	20.2	20.2	20.2	100.98	896	896	1	71	0	32447	By MS/MS	By MS/MS	By MS/MS	By MS/MS	By MS/MS	By MS/MS	10.7	7.4	12.1	14	16.5	15.3	2059200000	319570000	381950000	338310000	596660000
tr|Q4DGZ0|Q4DGZ0_TRYCC	tr|Q4DGZ0|Q4DGZ0_TRYCC	7	1	0	>tr|Q4DGZ0|Q4DGZ0_TRYCC Aspartate carbamoyltransferase, putative OS=Trypanosoma cruzi (strain CL Brener) GN=Tc00.1047053511923.110 PE=3 SV=1	1	7	1	0	28	7	7	7	7	1	1	1	1	0	0	0	0	20.5	4	0	36004	327	327	1	9	0	71697	By MS/MS	By MS/MS	By MS/MS	By MS/MS	By matching	By MS/MS	20.5	20.5	20.5	20.5	20.5	20.5	274690000	113910000	0	6616300	0
tr|Q4DG22|Q4DG22_TRYCC	tr|Q4DG22|Q4DG22_TRYCC	9	9	9	>tr|Q4DG22|Q4DG22_TRYCC Uncharacterized protein OS=Trypanosoma cruzi (strain CL Brener) GN=Tc00.1047053508241.130 PE=4 SV=1	1	9	9	9	28	6	5	8	9	6	5	8	9	6	5	8	9	11.5	11.5	11.5	120.55	1083	1083	1	61	0	74407	By MS/MS	By MS/MS	By MS/MS	By MS/MS	By MS/MS	By MS/MS	7.6	7.4	2.4	3.8	10.7	11.5	1214400000	186000000	141670000	325290000	516200000
tr|Q4DNU7|Q4DNU7_TRYCC	tr|Q4DNU7|Q4DNU7_TRYCC	8	8	8	>tr|Q4DNU7|Q4DNU7_TRYCC Uncharacterized protein OS=Trypanosoma cruzi (strain CL Brener) GN=Tc00.1047053511003.30 PE=4 SV=1	1	8	8	8	28	6	7	7	8	6	7	7	8	6	7	7	8	5.9	5.9	5.9	244.21	2180	2180	1	55	0	67695	By MS/MS	By MS/MS	By MS/MS	By MS/MS	By MS/MS	By MS/MS	4.7	5.3	3.3	2.5	5.1	5.9	1046000000	172500000	269970000	140030000	277840000
tr|Q4DH60|Q4DH60_TRYCC	tr|Q4DH60|Q4DH60_TRYCC	8	1	1	>tr|Q4DH60|Q4DH60_TRYCC Pyrroline-5-carboxylate reductase OS=Trypanosoma cruzi (strain CL Brener) GN=Tc00.1047053509207.90 PE=3 SV=1	1	8	1	1	28	6	6	8	8	0	1	1	1	0	1	1	1	32.7	4.5	4.5	28587	269	269	1	6	0.0091772	13264	By matching	By matching	By matching	By matching	By matching	By MS/MS	22.3	26.4	7.4	13	32.7	32.7	176790000	0	31807000	48516000	96469000
tr|Q4DX41|Q4DX41_TRYCC;tr|Q4CQ59|Q4CQ59_TRYCC	tr|Q4DX41|Q4DX41_TRYCC;tr|Q4CQ59|Q4CQ59_TRYCC	11;6	11;6	11;6	>tr|Q4DX41|Q4DX41_TRYCC Dynein heavy chain, putative OS=Trypanosoma cruzi (strain CL Brener) GN=Tc00.1047053508257.170 PE=4 SV=1;>tr|Q4CQ59|Q4CQ59_TRYCC Dynein heavy chain, putative (Fragment) OS=Trypanosoma cruzi (strain CL Brener) GN=Tc00.1047053506097.9	2	11	11	11	28	9	7	6	6	9	7	6	6	9	7	6	6	3.6	3.6	3.6	526.32	4602	4602;1837	1	76	0	22839	By MS/MS	By MS/MS	By MS/MS	By MS/MS	By MS/MS	By MS/MS	2.8	2	2	2.5	1.8	2	1467900000	255950000	401010000	155870000	240860000
tr|Q4E1C5|Q4E1C5_TRYCC	tr|Q4E1C5|Q4E1C5_TRYCC	11	11	11	>tr|Q4E1C5|Q4E1C5_TRYCC Uncharacterized protein OS=Trypanosoma cruzi (strain CL Brener) GN=Tc00.1047053511807.200 PE=4 SV=1	1	11	11	11	28	4	3	10	11	4	3	10	11	4	3	10	11	10.7	10.7	10.7	169	1476	1476	1	62	0	75.38	By MS/MS	By matching	By MS/MS	By matching	By MS/MS	By MS/MS	4.4	2.5	0.7	0.8	10	10.7	1510200000	107170000	75395000	465590000	855350000
tr|Q4D965|Q4D965_TRYCC	tr|Q4D965|Q4D965_TRYCC	9	1	1	>tr|Q4D965|Q4D965_TRYCC Uncharacterized protein OS=Trypanosoma cruzi (strain CL Brener) GN=Tc00.1047053506725.20 PE=4 SV=1	1	9	1	1	28	7	7	7	7	1	0	1	0	1	0	1	0	17.5	3.1	3.1	66474	587	587	1	5	0.0070945	14165	By MS/MS	By matching	By MS/MS	By MS/MS	By MS/MS	By matching	12.6	11.9	15	15	13.1	12.6	52861000	0	0	32767000	0
tr|Q4E2V9|Q4E2V9_TRYCC	tr|Q4E2V9|Q4E2V9_TRYCC	11	1	1	>tr|Q4E2V9|Q4E2V9_TRYCC Uncharacterized protein OS=Trypanosoma cruzi (strain CL Brener) GN=Tc00.1047053511283.10 PE=4 SV=1	1	11	1	1	28	5	4	10	9	0	0	1	1	0	0	1	1	27.7	3	3	57894	502	502	1	3	1	-2	By matching	By matching	By matching	By matching	By MS/MS	By matching	11.2	9	13.3	9	25.7	24.3	70124000	0	0	40067000	30056000
tr|Q4CVQ1|Q4CVQ1_TRYCC	tr|Q4CVQ1|Q4CVQ1_TRYCC	10	2	2	>tr|Q4CVQ1|Q4CVQ1_TRYCC Uncharacterized protein OS=Trypanosoma cruzi (strain CL Brener) GN=Tc00.1047053511037.20 PE=4 SV=1	1	10	2	2	28	5	7	8	8	0	1	1	1	0	1	1	1	20.6	4.8	4.8	57595	520	520	1	4	0	30832	By matching	By MS/MS	By matching	By matching	By MS/MS	By MS/MS	9	13.1	5.4	7.5	16	16.7	43330000	0	0	0	43330000
tr|Q4E4N4|Q4E4N4_TRYCC	tr|Q4E4N4|Q4E4N4_TRYCC	9	9	9	>tr|Q4E4N4|Q4E4N4_TRYCC Eukaryotic translation initiation factor 5A OS=Trypanosoma cruzi (strain CL Brener) GN=Tc00.1047053506925.120 PE=3 SV=1	1	9	9	9	27	5	5	9	8	5	5	9	8	5	5	9	8	54.5	54.5	54.5	18015	167	167	1	124	0	177.92	By MS/MS	By MS/MS	By MS/MS	By MS/MS	By MS/MS	By MS/MS	46.7	46.7	35.3	46.7	54.5	54.5	28007000000	3678200000	4973100000	5005000000	9675300000
tr|Q4DQF8|Q4DQF8_TRYCC	tr|Q4DQF8|Q4DQF8_TRYCC	8	8	1	>tr|Q4DQF8|Q4DQF8_TRYCC Cytochrome b5, putative OS=Trypanosoma cruzi (strain CL Brener) GN=Tc00.1047053506773.44 PE=3 SV=1	1	8	8	1	27	7	5	8	7	7	5	8	7	0	0	1	0	82	82	21.1	14956	133	133	1	109	0	181.93	By MS/MS	By MS/MS	By MS/MS	By MS/MS	By MS/MS	By MS/MS	60.9	60.9	82	60.9	82	60.9	17970000000	3156900000	3490500000	3079900000	4605700000
tr|Q4E2J4|Q4E2J4_TRYCC	tr|Q4E2J4|Q4E2J4_TRYCC	7	7	7	>tr|Q4E2J4|Q4E2J4_TRYCC Uncharacterized protein OS=Trypanosoma cruzi (strain CL Brener) GN=Tc00.1047053508479.270 PE=4 SV=1	1	7	7	7	27	7	7	6	7	7	7	6	7	7	7	6	7	34.5	34.5	34.5	34271	304	304	1	106	0	91559	By MS/MS	By MS/MS	By MS/MS	By MS/MS	By MS/MS	By MS/MS	34.5	34.5	34.5	34.5	31.6	34.5	9167500000	1661100000	1333900000	1178700000	2032400000
tr|Q4CVB5|Q4CVB5_TRYCC	tr|Q4CVB5|Q4CVB5_TRYCC	8	8	2	>tr|Q4CVB5|Q4CVB5_TRYCC 40 kDa cyclophilin, putative OS=Trypanosoma cruzi (strain CL Brener) GN=Tc00.1047053503687.40 PE=4 SV=1	1	8	8	2	27	6	7	7	7	6	7	7	7	2	2	2	2	26.6	26.6	7.3	38349	354	354	1	79	0	110.23	By MS/MS	By MS/MS	By MS/MS	By MS/MS	By MS/MS	By MS/MS	19.2	23.7	19.5	16.7	24	23.7	5533000000	1031500000	1069500000	771790000	1380100000
tr|Q4D2A8|Q4D2A8_TRYCC;tr|Q4D0Q9|Q4D0Q9_TRYCC	tr|Q4D2A8|Q4D2A8_TRYCC;tr|Q4D0Q9|Q4D0Q9_TRYCC	8;5	8;5	8;5	>tr|Q4D2A8|Q4D2A8_TRYCC Uncharacterized protein OS=Trypanosoma cruzi (strain CL Brener) GN=Tc00.1047053511409.10 PE=4 SV=1;>tr|Q4D0Q9|Q4D0Q9_TRYCC Uncharacterized protein (Fragment) OS=Trypanosoma cruzi (strain CL Brener) GN=Tc00.1047053509571.4 PE=4 SV=1	2	8	8	8	27	6	5	8	8	6	5	8	8	6	5	8	8	31.2	31.2	31.2	60517	551	551;223	1	103	0	149.44	By MS/MS	By MS/MS	By MS/MS	By MS/MS	By MS/MS	By MS/MS	24.7	18.9	22.1	22.1	31.2	31.2	6626300000	888540000	1288700000	1213500000	1945800000
tr|Q4D9J8|Q4D9J8_TRYCC	tr|Q4D9J8|Q4D9J8_TRYCC	8	8	1	>tr|Q4D9J8|Q4D9J8_TRYCC Pyrroline-5-carboxylate reductase OS=Trypanosoma cruzi (strain CL Brener) GN=Tc00.1047053506857.20 PE=3 SV=1	1	8	8	1	27	6	5	8	8	6	5	8	8	0	0	1	1	32.7	32.7	4.5	28559	269	269	1	59	0	41902	By MS/MS	By MS/MS	By MS/MS	By MS/MS	By MS/MS	By MS/MS	22.3	21.9	7.4	13	32.7	32.7	4299200000	655490000	980800000	763020000	1105600000
tr|Q4DUU1|Q4DUU1_TRYCC;tr|Q4D0C9|Q4D0C9_TRYCC	tr|Q4DUU1|Q4DUU1_TRYCC;tr|Q4D0C9|Q4D0C9_TRYCC	8;8	8;8	8;8	>tr|Q4DUU1|Q4DUU1_TRYCC Uncharacterized protein OS=Trypanosoma cruzi (strain CL Brener) GN=Tc00.1047053508501.250 PE=4 SV=1;>tr|Q4D0C9|Q4D0C9_TRYCC Uncharacterized protein OS=Trypanosoma cruzi (strain CL Brener) GN=Tc00.1047053506893.100 PE=4 SV=1	2	8	8	8	27	6	7	6	8	6	7	6	8	6	7	6	8	35.6	35.6	35.6	29.4	261	261;261	1	65	0	68928	By MS/MS	By MS/MS	By MS/MS	By MS/MS	By MS/MS	By MS/MS	27.2	33	16.5	13.4	29.5	35.6	3631800000	677240000	767980000	577050000	1137400000
tr|Q4D8U6|Q4D8U6_TRYCC	tr|Q4D8U6|Q4D8U6_TRYCC	8	4	0	>tr|Q4D8U6|Q4D8U6_TRYCC Universal minicircle sequence binding protein (UMSBP) OS=Trypanosoma cruzi (strain CL Brener) GN=Tc00.1047053503781.80 PE=4 SV=1	1	8	4	0	27	6	6	8	7	2	2	4	3	0	0	0	0	81.3	42.5	0	14385	134	134	1	46	0	50524	By MS/MS	By MS/MS	By MS/MS	By MS/MS	By MS/MS	By MS/MS	67.9	67.9	67.9	76.1	81.3	76.1	4655700000	201340000	642620000	975180000	2189100000
tr|Q4CZN2|Q4CZN2_TRYCC	tr|Q4CZN2|Q4CZN2_TRYCC	9	9	3	>tr|Q4CZN2|Q4CZN2_TRYCC Peptidylprolyl isomerase OS=Trypanosoma cruzi (strain CL Brener) GN=Tc00.1047053511353.10 PE=4 SV=1	1	9	9	3	27	6	5	8	8	6	5	8	8	2	2	3	3	31.8	31.8	12.3	51644	456	456	1	101	0	186.94	By MS/MS	By MS/MS	By MS/MS	By MS/MS	By MS/MS	By MS/MS	23.2	16.9	23.2	25.4	29.6	29.6	5820100000	959180000	824290000	1244500000	1753400000
tr|Q4DL16|Q4DL16_TRYCC	tr|Q4DL16|Q4DL16_TRYCC	9	2	2	>tr|Q4DL16|Q4DL16_TRYCC Pyruvate dehydrogenase E1 component alpha subunit, putative (Fragment) OS=Trypanosoma cruzi (strain CL Brener) GN=Tc00.1047053511261.160 PE=4 SV=1	1	9	2	2	27	6	6	8	7	2	2	2	2	2	2	2	2	51.1	6.3	6.3	22023	190	190	1	22	0	45025	By MS/MS	By MS/MS	By MS/MS	By MS/MS	By MS/MS	By MS/MS	34.2	34.2	28.9	28.9	51.1	38.9	1671200000	357320000	332670000	271070000	220070000
tr|Q4DPV3|Q4DPV3_TRYCC	tr|Q4DPV3|Q4DPV3_TRYCC	9	9	9	>tr|Q4DPV3|Q4DPV3_TRYCC RuvB-like helicase OS=Trypanosoma cruzi (strain CL Brener) GN=Tc00.1047053510877.60 PE=3 SV=1	1	9	9	9	27	6	5	8	8	6	5	8	8	6	5	8	8	24.7	24.7	24.7	52701	474	474	1	76	0	45952	By MS/MS	By MS/MS	By MS/MS	By MS/MS	By MS/MS	By MS/MS	15.2	14.1	12.9	15.2	21.9	22.4	4031000000	574410000	764990000	771490000	1409400000
tr|Q4DRW6|Q4DRW6_TRYCC;tr|Q4D4E6|Q4D4E6_TRYCC	tr|Q4DRW6|Q4DRW6_TRYCC;tr|Q4D4E6|Q4D4E6_TRYCC	8;8	8;8	8;8	>tr|Q4DRW6|Q4DRW6_TRYCC Dynein intermediate chain, putative OS=Trypanosoma cruzi (strain CL Brener) GN=Tc00.1047053507669.70 PE=4 SV=1;>tr|Q4D4E6|Q4D4E6_TRYCC Dynein intermediate chain, putative OS=Trypanosoma cruzi (strain CL Brener) GN=Tc00.1047053507857	2	8	8	8	27	6	7	6	8	6	7	6	8	6	7	6	8	14.7	14.7	14.7	74647	667	667;667	1	83	0	55594	By MS/MS	By MS/MS	By MS/MS	By MS/MS	By MS/MS	By MS/MS	11.2	13.5	12.1	13.5	11.1	14.7	4127800000	613180000	1035300000	540430000	823000000
tr|Q4DXL4|Q4DXL4_TRYCC;tr|Q4DCW2|Q4DCW2_TRYCC	tr|Q4DXL4|Q4DXL4_TRYCC;tr|Q4DCW2|Q4DCW2_TRYCC	7;7	7;7	7;7	>tr|Q4DXL4|Q4DXL4_TRYCC Alpha-mannosidase OS=Trypanosoma cruzi (strain CL Brener) GN=Tc00.1047053506195.120 PE=3 SV=1;>tr|Q4DCW2|Q4DCW2_TRYCC Alpha-mannosidase OS=Trypanosoma cruzi (strain CL Brener) GN=Tc00.1047053506407.10 PE=3 SV=1	2	7	7	7	27	7	7	6	7	7	7	6	7	7	7	6	7	12.2	12.2	12.2	111.25	977	977;977	1	87	0	40.2	By MS/MS	By MS/MS	By MS/MS	By MS/MS	By MS/MS	By MS/MS	12.2	12.2	8.7	12.2	10.5	12.2	3594600000	652450000	941620000	401670000	678020000
tr|Q4DYI6|Q4DYI6_TRYCC	tr|Q4DYI6|Q4DYI6_TRYCC	9	9	9	>tr|Q4DYI6|Q4DYI6_TRYCC LA RNA binding protein, putative OS=Trypanosoma cruzi (strain CL Brener) GN=Tc00.1047053511367.60 PE=4 SV=1	1	9	9	9	27	5	7	7	8	5	7	7	8	5	7	7	8	30	30	30	37505	333	333	1	90	0	82721	By MS/MS	By MS/MS	By MS/MS	By MS/MS	By MS/MS	By MS/MS	21	25.8	19.2	24	27.6	30	2693700000	330430000	456930000	656090000	1071200000
tr|Q4DX96|Q4DX96_TRYCC;tr|Q4DGP8|Q4DGP8_TRYCC	tr|Q4DX96|Q4DX96_TRYCC;tr|Q4DGP8|Q4DGP8_TRYCC	9;8	9;8	9;8	>tr|Q4DX96|Q4DX96_TRYCC Phosphoglycerate kinase OS=Trypanosoma cruzi (strain CL Brener) GN=Tc00.1047053506945.20 PE=3 SV=1;>tr|Q4DGP8|Q4DGP8_TRYCC Phosphoglycerate kinase OS=Trypanosoma cruzi (strain CL Brener) GN=Tc00.1047053506835.70 PE=3 SV=1	2	9	9	9	27	6	6	8	7	6	6	8	7	6	6	8	7	24.9	24.9	24.9	57945	527	527;527	1	80	0	49052	By MS/MS	By MS/MS	By MS/MS	By MS/MS	By MS/MS	By MS/MS	17.1	15.2	12	13.7	21.6	20.5	2472900000	438250000	517510000	337750000	641600000
tr|Q4DW02|Q4DW02_TRYCC;tr|Q4DW03|Q4DW03_TRYCC;tr|Q4CV00|Q4CV00_TRYCC;tr|Q4E5M4|Q4E5M4_TRYCC;tr|Q4CMU6|Q4CMU6_TRYCC;tr|Q4CTX9|Q4CTX9_TRYCC;tr|Q4CTY0|Q4CTY0_TRYCC;tr|Q4E2M5|Q4E2M5_TRYCC	tr|Q4DW02|Q4DW02_TRYCC;tr|Q4DW03|Q4DW03_TRYCC;tr|Q4CV00|Q4CV00_TRYCC;tr|Q4E5M4|Q4E5M4_TRYCC	8;7;6;4;3;2;1;1	2;2;2;0;0;0;0;0	2;2;2;0;0;0;0;0	>tr|Q4DW02|Q4DW02_TRYCC Cruzipain, putative OS=Trypanosoma cruzi (strain CL Brener) GN=Tc00.1047053507603.270 PE=3 SV=1;>tr|Q4DW03|Q4DW03_TRYCC Cysteine peptidase, putative OS=Trypanosoma cruzi (strain CL Brener) GN=Tc00.1047053507603.260 PE=3 SV=1;>tr|Q4C	8	8	2	2	27	7	7	6	7	2	1	1	1	2	1	1	1	21.8	5.8	5.8	49896	467	467;467;426;322;467;181;175;244	1	27	0.0021723	21245	By MS/MS	By MS/MS	By MS/MS	By MS/MS	By MS/MS	By matching	20.1	19.1	21.8	19.1	17.3	19.1	619420000	231930000	97490000	25536000	18700000
tr|Q4DPS1|Q4DPS1_TRYCC	tr|Q4DPS1|Q4DPS1_TRYCC	9	9	4	>tr|Q4DPS1|Q4DPS1_TRYCC Uncharacterized protein OS=Trypanosoma cruzi (strain CL Brener) GN=Tc00.1047053507047.150 PE=4 SV=1	1	9	9	4	27	6	6	7	8	6	6	7	8	2	2	3	3	24	24	12.7	56829	505	505	1	78	0	39573	By MS/MS	By MS/MS	By MS/MS	By MS/MS	By MS/MS	By MS/MS	15.4	14.1	12.3	12.3	19.2	20.2	2409300000	226240000	535350000	348420000	884980000
tr|Q4DD69|Q4DD69_TRYCC	tr|Q4DD69|Q4DD69_TRYCC	7	3	3	>tr|Q4DD69|Q4DD69_TRYCC Uncharacterized protein OS=Trypanosoma cruzi (strain CL Brener) GN=Tc00.1047053503975.40 PE=4 SV=1	1	7	3	3	27	7	7	7	6	3	3	3	3	3	3	3	3	11.9	5.5	5.5	84748	806	806	1	45	0	11383	By MS/MS	By MS/MS	By MS/MS	By MS/MS	By MS/MS	By MS/MS	11.9	11.9	9.4	11.9	11.9	9.4	2037700000	462410000	329270000	245270000	417640000
tr|Q4DZ02|Q4DZ02_TRYCC	tr|Q4DZ02|Q4DZ02_TRYCC	8	8	8	>tr|Q4DZ02|Q4DZ02_TRYCC Glucosamine-fructose-6-phosphate aminotransferase, putative OS=Trypanosoma cruzi (strain CL Brener) GN=Tc00.1047053510303.200 PE=4 SV=1	1	8	8	8	27	6	6	8	7	6	6	8	7	6	6	8	7	17.3	17.3	17.3	75861	693	693	1	67	0	199.85	By MS/MS	By MS/MS	By MS/MS	By MS/MS	By MS/MS	By MS/MS	12.6	12.6	10.4	8.8	17.3	13.6	1777200000	277500000	415810000	391740000	402250000
tr|Q4E4G0|Q4E4G0_TRYCC	tr|Q4E4G0|Q4E4G0_TRYCC	8	2	2	>tr|Q4E4G0|Q4E4G0_TRYCC 40 kDa cyclophilin, putative OS=Trypanosoma cruzi (strain CL Brener) GN=Tc00.1047053506885.400 PE=4 SV=1	1	8	2	2	27	6	7	7	7	2	2	2	2	2	2	2	2	26	6.8	6.8	38363	354	354	1	26	0	19942	By MS/MS	By MS/MS	By MS/MS	By MS/MS	By MS/MS	By MS/MS	18.6	23.2	18.9	16.1	23.4	23.2	1002300000	113530000	247570000	108430000	244330000
tr|Q4D3V3|Q4D3V3_TRYCC;tr|Q4DYM9|Q4DYM9_TRYCC	tr|Q4D3V3|Q4D3V3_TRYCC;tr|Q4DYM9|Q4DYM9_TRYCC	10;9	10;9	10;9	>tr|Q4D3V3|Q4D3V3_TRYCC Uncharacterized protein OS=Trypanosoma cruzi (strain CL Brener) GN=Tc00.1047053507221.70 PE=4 SV=1;>tr|Q4DYM9|Q4DYM9_TRYCC Uncharacterized protein OS=Trypanosoma cruzi (strain CL Brener) GN=Tc00.1047053504427.140 PE=4 SV=1	2	10	10	10	27	4	7	8	8	4	7	8	8	4	7	8	8	19.2	19.2	19.2	93476	864	864;932	1	75	0	56787	By MS/MS	By MS/MS	By MS/MS	By MS/MS	By MS/MS	By MS/MS	7.8	13.8	7.8	9.4	15.9	14.8	2023600000	275020000	494410000	279550000	486200000
tr|Q4DFG6|Q4DFG6_TRYCC	tr|Q4DFG6|Q4DFG6_TRYCC	8	8	8	>tr|Q4DFG6|Q4DFG6_TRYCC Kinesin-like protein, putative OS=Trypanosoma cruzi (strain CL Brener) GN=Tc00.1047053506155.30 PE=3 SV=1	1	8	8	8	27	7	7	6	7	7	7	6	7	7	7	6	7	16.7	16.7	16.7	70691	621	621	1	75	0	66826	By MS/MS	By MS/MS	By MS/MS	By MS/MS	By MS/MS	By MS/MS	16.6	14	13.8	13.8	14.8	15	1773000000	270580000	381230000	292810000	264310000
tr|Q4DSW8|Q4DSW8_TRYCC	tr|Q4DSW8|Q4DSW8_TRYCC	9	9	0	>tr|Q4DSW8|Q4DSW8_TRYCC Mitotubule-associated protein Gb4, putative (Fragment) OS=Trypanosoma cruzi (strain CL Brener) GN=Tc00.1047053508347.159 PE=4 SV=1	1	9	9	0	27	8	7	6	6	8	7	6	6	0	0	0	0	18.1	18.1	0	137.41	1189	1189	1	82	0	19845	By MS/MS	By MS/MS	By MS/MS	By MS/MS	By MS/MS	By MS/MS	17	14.8	18.1	18.1	12.3	12	2350100000	537050000	600090000	175160000	249860000
tr|Q4CSX0|Q4CSX0_TRYCC	tr|Q4CSX0|Q4CSX0_TRYCC	9	3	3	>tr|Q4CSX0|Q4CSX0_TRYCC Proteasome regulatory non-ATPase subunit 6, putative (Fragment) OS=Trypanosoma cruzi (strain CL Brener) GN=Tc00.1047053503513.40 PE=4 SV=1	1	9	3	3	27	5	6	8	8	1	2	3	3	1	2	3	3	46.3	12.3	12.3	25.62	227	227	1	25	0	25497	By MS/MS	By MS/MS	By MS/MS	By MS/MS	By MS/MS	By MS/MS	25.6	30	29.5	21.6	41.9	37	546980000	37978000	103980000	124190000	249000000
tr|Q4D1D9|Q4D1D9_TRYCC	tr|Q4D1D9|Q4D1D9_TRYCC	7	2	2	>tr|Q4D1D9|Q4D1D9_TRYCC Uncharacterized protein OS=Trypanosoma cruzi (strain CL Brener) GN=Tc00.1047053504087.20 PE=4 SV=1	1	7	2	2	27	7	7	6	7	2	2	2	2	2	2	2	2	3.6	1.2	1.2	323.24	2983	2983	1	21	0	32739	By MS/MS	By MS/MS	By MS/MS	By MS/MS	By MS/MS	By MS/MS	3.6	3.6	3.2	3.6	2.9	3.6	786470000	127370000	145940000	114990000	198170000
tr|Q4DY30|Q4DY30_TRYCC	tr|Q4DY30|Q4DY30_TRYCC	9	1	1	>tr|Q4DY30|Q4DY30_TRYCC RNA-binding protein, putative OS=Trypanosoma cruzi (strain CL Brener) GN=Tc00.1047053511727.290 PE=4 SV=1	1	9	1	1	27	4	5	9	9	0	1	1	1	0	1	1	1	42.2	4.8	4.8	26868	249	249	1	4	1	-2	By matching	By MS/MS	By matching	By matching	By matching	By MS/MS	16.9	22.1	17.3	26.9	42.2	42.2	43179000	0	7412800	12674000	18890000
tr|Q4D488|Q4D488_TRYCC	tr|Q4D488|Q4D488_TRYCC	10	2	2	>tr|Q4D488|Q4D488_TRYCC RNA-binding protein, putative OS=Trypanosoma cruzi (strain CL Brener) GN=Tc00.1047053509317.60 PE=4 SV=1	1	10	2	2	27	6	7	7	7	0	1	1	1	0	1	1	1	26.5	6.4	6.4	49635	419	419	1	4	0	71833	By matching	By MS/MS	By matching	By matching	By MS/MS	By MS/MS	16.7	18.9	11.9	13.8	19.8	20.3	58720000	0	0	0	58720000
tr|Q4DQR5|Q4DQR5_TRYCC	tr|Q4DQR5|Q4DQR5_TRYCC	9	1	1	>tr|Q4DQR5|Q4DQR5_TRYCC 3-hydroxy-3-methylglutaryl coenzyme A reductase OS=Trypanosoma cruzi (strain CL Brener) GN=Tc00.1047053509167.20 PE=3 SV=1	1	9	1	1	27	5	5	8	9	0	0	1	1	0	0	1	1	28.1	4	4	48.01	452	452	1	8	0	35.62	By matching	By matching	By matching	By matching	By MS/MS	By MS/MS	12.4	12.4	12.4	12.4	25.9	28.1	76460000	0	0	65408000	11052000
tr|Q4E3P1|Q4E3P1_TRYCC;tr|Q4E0Q3|Q4E0Q3_TRYCC	tr|Q4E3P1|Q4E3P1_TRYCC;tr|Q4E0Q3|Q4E0Q3_TRYCC	7;7	7;7	7;7	>tr|Q4E3P1|Q4E3P1_TRYCC 40S ribosomal protein S5, putative OS=Trypanosoma cruzi (strain CL Brener) GN=Tc00.1047053510101.170 PE=3 SV=1;>tr|Q4E0Q3|Q4E0Q3_TRYCC 40S ribosomal protein S5, putative OS=Trypanosoma cruzi (strain CL Brener) GN=Tc00.1047053506297.	2	7	7	7	26	6	6	7	7	6	6	7	7	6	6	7	7	46.3	46.3	46.3	21.28	190	190;190	1	140	0	42876	By MS/MS	By MS/MS	By MS/MS	By MS/MS	By MS/MS	By MS/MS	33.7	33.7	33.2	33.2	46.3	46.3	27224000000	4450000000	5699600000	5007600000	8168300000
tr|Q4D0F2|Q4D0F2_TRYCC	tr|Q4D0F2|Q4D0F2_TRYCC	7	7	3	>tr|Q4D0F2|Q4D0F2_TRYCC Glucosamine-6-phosphate isomerase OS=Trypanosoma cruzi (strain CL Brener) GN=Tc00.1047053511531.50 PE=3 SV=1	1	7	7	3	26	7	6	6	7	7	6	6	7	3	2	2	3	34.4	34.4	15.8	31442	279	279	1	99	0	64.16	By MS/MS	By MS/MS	By MS/MS	By MS/MS	By MS/MS	By MS/MS	34.4	26.9	34.4	31.5	30.5	34.4	12541000000	2355800000	3143300000	1564700000	2507700000
tr|Q4CVH4|Q4CVH4_TRYCC	tr|Q4CVH4|Q4CVH4_TRYCC	9	9	9	>tr|Q4CVH4|Q4CVH4_TRYCC Glutamate dehydrogenase, putative (Fragment) OS=Trypanosoma cruzi (strain CL Brener) GN=Tc00.1047053505843.10 PE=4 SV=1	1	9	9	9	26	5	6	7	8	5	6	7	8	5	6	7	8	46.4	46.4	46.4	24121	211	211	1	75	0	24729	By MS/MS	By MS/MS	By MS/MS	By MS/MS	By MS/MS	By MS/MS	29.4	34.1	35.5	26.1	41.2	39.3	11867000000	2251800000	1838700000	1562700000	3555300000
tr|Q4D1H4|Q4D1H4_TRYCC	tr|Q4D1H4|Q4D1H4_TRYCC	10	10	2	>tr|Q4D1H4|Q4D1H4_TRYCC Proteasome subunit alpha type OS=Trypanosoma cruzi (strain CL Brener) GN=Tc00.1047053511145.43 PE=3 SV=1	1	10	10	2	26	6	5	7	8	6	5	7	8	2	2	2	2	47.8	47.8	15.1	27108	245	245	1	87	0	21794	By MS/MS	By MS/MS	By MS/MS	By MS/MS	By MS/MS	By MS/MS	31	29.8	34.3	23.7	39.6	40.8	3464300000	529150000	551010000	596050000	1111200000
tr|Q4CR23|Q4CR23_TRYCC	tr|Q4CR23|Q4CR23_TRYCC	8	8	3	>tr|Q4CR23|Q4CR23_TRYCC Uncharacterized protein OS=Trypanosoma cruzi (strain CL Brener) GN=Tc00.1047053504421.19 PE=4 SV=1	1	8	8	3	26	6	5	7	8	6	5	7	8	2	1	3	3	49.5	49.5	23.4	23911	214	214	1	73	0	23791	By MS/MS	By MS/MS	By MS/MS	By MS/MS	By MS/MS	By MS/MS	33.2	25.2	44.4	33.2	44.4	49.5	2308000000	350450000	445420000	366640000	670970000
tr|Q4D1R0|Q4D1R0_TRYCC	tr|Q4D1R0|Q4D1R0_TRYCC	9	9	3	>tr|Q4D1R0|Q4D1R0_TRYCC Ubiquitin carboxyl-terminal hydrolase OS=Trypanosoma cruzi (strain CL Brener) GN=Tc00.1047053510945.10 PE=3 SV=1	1	9	9	3	26	7	4	7	8	7	4	7	8	3	2	2	2	46.8	46.8	15.2	34622	310	310	1	71	0	23165	By MS/MS	By MS/MS	By MS/MS	By MS/MS	By MS/MS	By MS/MS	31.6	19	12.9	12.9	38.1	42.9	2575300000	319450000	542520000	593560000	794930000
tr|Q4DK88|Q4DK88_TRYCC	tr|Q4DK88|Q4DK88_TRYCC	7	3	3	>tr|Q4DK88|Q4DK88_TRYCC Peptide methionine sulfoxide reductase, putative OS=Trypanosoma cruzi (strain CL Brener) GN=Tc00.1047053509611.180 PE=3 SV=1	1	7	3	3	26	6	7	7	6	3	3	3	2	3	3	3	2	41.2	21.5	21.5	19951	177	177	1	40	0	38881	By MS/MS	By MS/MS	By MS/MS	By MS/MS	By MS/MS	By MS/MS	41.2	41.2	41.2	34.5	41.2	34.5	1558000000	159830000	280510000	382920000	629200000
tr|Q4CYK5|Q4CYK5_TRYCC	tr|Q4CYK5|Q4CYK5_TRYCC	9	9	9	>tr|Q4CYK5|Q4CYK5_TRYCC Proteasome subunit alpha type OS=Trypanosoma cruzi (strain CL Brener) GN=Tc00.1047053503613.20 PE=3 SV=1	1	9	9	9	26	5	5	7	9	5	5	7	9	5	5	7	9	39.3	39.3	39.3	28049	247	247	1	71	0	19.16	By MS/MS	By MS/MS	By MS/MS	By MS/MS	By MS/MS	By MS/MS	18.2	18.2	11.7	16.6	25.5	39.3	2890500000	293700000	460170000	780360000	1102800000
tr|Q4DBY0|Q4DBY0_TRYCC	tr|Q4DBY0|Q4DBY0_TRYCC	10	10	10	>tr|Q4DBY0|Q4DBY0_TRYCC Proteasome regulatory non-ATPase subunit 5, putative OS=Trypanosoma cruzi (strain CL Brener) GN=Tc00.1047053506977.90 PE=4 SV=1	1	10	10	10	26	3	5	9	9	3	5	9	9	3	5	9	9	30.2	30.2	30.2	54807	480	480	1	76	0	323.31	By MS/MS	By MS/MS	By MS/MS	By MS/MS	By MS/MS	By MS/MS	8.5	13.8	8.3	7.7	27.1	28.8	2969700000	319580000	362690000	751080000	1275900000
tr|Q4D3D1|Q4D3D1_TRYCC	tr|Q4D3D1|Q4D3D1_TRYCC	8	1	1	>tr|Q4D3D1|Q4D3D1_TRYCC Uncharacterized protein (Fragment) OS=Trypanosoma cruzi (strain CL Brener) GN=Tc00.1047053503959.78 PE=4 SV=1	1	8	1	1	26	5	6	8	7	1	1	1	1	1	1	1	1	22.3	4.4	4.4	46885	412	412	1	13	0	46138	By MS/MS	By MS/MS	By MS/MS	By MS/MS	By MS/MS	By MS/MS	18.4	18.7	20.4	20.1	22.3	22.1	1163200000	177170000	191570000	129900000	215160000
tr|Q4DZE2|Q4DZE2_TRYCC;tr|Q4E2Y3|Q4E2Y3_TRYCC	tr|Q4DZE2|Q4DZE2_TRYCC;tr|Q4E2Y3|Q4E2Y3_TRYCC	9;6	9;6	9;6	>tr|Q4DZE2|Q4DZE2_TRYCC Uncharacterized protein OS=Trypanosoma cruzi (strain CL Brener) GN=Tc00.1047053506825.210 PE=4 SV=1;>tr|Q4E2Y3|Q4E2Y3_TRYCC Uncharacterized protein OS=Trypanosoma cruzi (strain CL Brener) GN=Tc00.1047053508175.110 PE=4 SV=1	2	9	9	9	26	5	5	7	9	5	5	7	9	5	5	7	9	15.7	15.7	15.7	103.49	920	920;920	1	65	0	38694	By MS/MS	By MS/MS	By MS/MS	By MS/MS	By MS/MS	By MS/MS	7.9	7.9	5.7	9.7	12.5	15.7	1669900000	210530000	323190000	212400000	627160000
tr|Q4D6X8|Q4D6X8_TRYCC	tr|Q4D6X8|Q4D6X8_TRYCC	10	6	6	>tr|Q4D6X8|Q4D6X8_TRYCC Glutamine-dependent carbamoyl-phosphate synthetase, putative (Fragment) OS=Trypanosoma cruzi (strain CL Brener) GN=Tc00.1047053511647.4 PE=3 SV=1	1	10	6	6	26	4	4	10	8	3	3	6	4	3	3	6	4	17.6	11.5	11.5	94507	850	850	1	33	0	14096	By matching	By MS/MS	By matching	By MS/MS	By MS/MS	By MS/MS	6.5	6.5	4.7	4.7	17.6	14.8	896520000	156780000	185800000	219370000	249920000
tr|Q4DXX8|Q4DXX8_TRYCC	tr|Q4DXX8|Q4DXX8_TRYCC	10	10	10	>tr|Q4DXX8|Q4DXX8_TRYCC Nucleolar GTP-binding protein 1 OS=Trypanosoma cruzi (strain CL Brener) GN=Tc00.1047053510431.160 PE=3 SV=1	1	10	10	10	26	5	5	8	8	5	5	8	8	5	5	8	8	24	24	24	74646	654	654	1	53	0	24287	By matching	By MS/MS	By matching	By matching	By MS/MS	By MS/MS	9.2	9.9	0	2	16.5	20	1361500000	79526000	185690000	411700000	682810000
tr|Q4CL55|Q4CL55_TRYCC	tr|Q4CL55|Q4CL55_TRYCC	8	1	1	>tr|Q4CL55|Q4CL55_TRYCC Trypanothione reductase, putative (Fragment) OS=Trypanosoma cruzi (strain CL Brener) GN=Tc00.1047053484299.10 PE=4 SV=1	1	8	1	1	26	6	6	6	8	0	0	0	1	0	0	0	1	76.2	12.7	12.7	20442	189	189	1	2	0	31773	By matching	By matching	By matching	By matching	By matching	By MS/MS	51.3	51.3	47.1	51.3	59.3	76.2	43891000	0	0	0	43891000
tr|Q4DNV7|Q4DNV7_TRYCC	tr|Q4DNV7|Q4DNV7_TRYCC	10	1	0	>tr|Q4DNV7|Q4DNV7_TRYCC Phosphoglycerate kinase OS=Trypanosoma cruzi (strain CL Brener) GN=Tc00.1047053505999.100 PE=3 SV=1	1	10	1	0	26	4	4	8	10	0	0	0	1	0	0	0	0	27.8	3.4	0	54902	503	503	1	2	0.0099626	1247	By matching	By matching	By matching	By matching	By matching	By MS/MS	12.9	12.3	13.9	11.3	20.9	27.8	35171000	0	0	0	35171000
tr|Q4DUK7|Q4DUK7_TRYCC;tr|Q4DHY1|Q4DHY1_TRYCC	tr|Q4DUK7|Q4DUK7_TRYCC;tr|Q4DHY1|Q4DHY1_TRYCC	8;7	8;7	8;7	>tr|Q4DUK7|Q4DUK7_TRYCC Elongation of fatty acids protein OS=Trypanosoma cruzi (strain CL Brener) GN=Tc00.1047053511245.130 PE=3 SV=1;>tr|Q4DHY1|Q4DHY1_TRYCC Elongation of fatty acids protein OS=Trypanosoma cruzi (strain CL Brener) GN=Tc00.1047053506661.30	2	8	8	8	25	6	8	5	6	6	8	5	6	6	8	5	6	42.6	42.6	42.6	32611	289	289;289	1	157	0	65.38	By MS/MS	By MS/MS	By MS/MS	By MS/MS	By MS/MS	By MS/MS	21.5	42.6	18	21.5	24.9	21.5	10524000000	2140500000	2942300000	1094500000	2243000000
tr|Q4DMU8|Q4DMU8_TRYCC	tr|Q4DMU8|Q4DMU8_TRYCC	8	8	8	>tr|Q4DMU8|Q4DMU8_TRYCC Reticulon-like protein OS=Trypanosoma cruzi (strain CL Brener) GN=Tc00.1047053511517.37 PE=4 SV=1	1	8	8	8	25	5	8	6	6	5	8	6	6	5	8	6	6	37.6	37.6	37.6	21016	186	186	1	141	0	142.58	By MS/MS	By MS/MS	By MS/MS	By MS/MS	By MS/MS	By MS/MS	30.1	37.6	30.1	30.1	30.1	30.1	8763400000	1401500000	2204700000	1297900000	1653700000
tr|Q4DEJ6|Q4DEJ6_TRYCC	tr|Q4DEJ6|Q4DEJ6_TRYCC	7	7	5	>tr|Q4DEJ6|Q4DEJ6_TRYCC Glutathione peroxidase OS=Trypanosoma cruzi (strain CL Brener) GN=Tc00.1047053503899.110 PE=3 SV=1	1	7	7	5	25	6	6	7	6	6	6	7	6	5	5	5	4	39	39	26.8	18292	164	164	1	85	0	11849	By MS/MS	By MS/MS	By MS/MS	By MS/MS	By MS/MS	By MS/MS	31.7	31.7	31.7	31.7	39	39	8168100000	1249600000	1905800000	1085400000	1454000000
tr|Q4DLZ8|Q4DLZ8_TRYCC	tr|Q4DLZ8|Q4DLZ8_TRYCC	7	7	2	>tr|Q4DLZ8|Q4DLZ8_TRYCC Protein tyrosine phosphatase-like protein, putative OS=Trypanosoma cruzi (strain CL Brener) GN=Tc00.1047053510603.80 PE=4 SV=1	1	7	7	2	25	6	6	6	7	6	6	6	7	1	1	1	2	50.6	50.6	7.8	19705	180	180	1	93	0	40208	By MS/MS	By MS/MS	By MS/MS	By MS/MS	By MS/MS	By MS/MS	50.6	50.6	43.3	50.6	50.6	50.6	4652800000	722120000	1012900000	812560000	1378500000
tr|Q4DAN2|Q4DAN2_TRYCC;tr|Q4DMX4|Q4DMX4_TRYCC	tr|Q4DAN2|Q4DAN2_TRYCC;tr|Q4DMX4|Q4DMX4_TRYCC	7;6	7;6	7;6	>tr|Q4DAN2|Q4DAN2_TRYCC Uncharacterized protein OS=Trypanosoma cruzi (strain CL Brener) GN=Tc00.1047053506727.50 PE=4 SV=1;>tr|Q4DMX4|Q4DMX4_TRYCC Uncharacterized protein OS=Trypanosoma cruzi (strain CL Brener) GN=Tc00.1047053511529.210 PE=4 SV=1	2	7	7	7	25	5	7	7	6	5	7	7	6	5	7	7	6	82.9	82.9	82.9	16411	146	146;146	1	98	0	117.18	By MS/MS	By MS/MS	By MS/MS	By MS/MS	By MS/MS	By MS/MS	50	82.9	60.3	82.9	82.9	60.3	5847800000	541310000	1176600000	901140000	1229900000
tr|Q4DMP7|Q4DMP7_TRYCC;tr|Q4CP72|Q4CP72_TRYCC	tr|Q4DMP7|Q4DMP7_TRYCC;tr|Q4CP72|Q4CP72_TRYCC	8;7	8;7	8;7	>tr|Q4DMP7|Q4DMP7_TRYCC Uncharacterized protein OS=Trypanosoma cruzi (strain CL Brener) GN=Tc00.1047053508899.54 PE=4 SV=1;>tr|Q4CP72|Q4CP72_TRYCC Uncharacterized protein (Fragment) OS=Trypanosoma cruzi (strain CL Brener) GN=Tc00.1047053511363.4 PE=4 SV=1	2	8	8	8	25	5	5	8	7	5	5	8	7	5	5	8	7	40.1	40.1	40.1	33856	299	299;250	1	106	0	83272	By MS/MS	By MS/MS	By MS/MS	By MS/MS	By MS/MS	By MS/MS	27.8	27.8	16.7	16.7	40.1	36.8	8024300000	1103600000	1261300000	1747000000	2562700000
tr|Q4DVK9|Q4DVK9_TRYCC	tr|Q4DVK9|Q4DVK9_TRYCC	7	7	2	>tr|Q4DVK9|Q4DVK9_TRYCC C-1-tetrahydrofolate synthase, cytoplasmic, putative OS=Trypanosoma cruzi (strain CL Brener) GN=Tc00.1047053508207.240 PE=3 SV=1	1	7	7	2	25	5	6	7	7	5	6	7	7	2	2	2	2	31.6	31.6	6.4	31605	297	297	1	94	0	111.31	By MS/MS	By MS/MS	By MS/MS	By MS/MS	By MS/MS	By MS/MS	25.9	26.3	25.9	19.5	31.6	31.6	6853700000	1140200000	1306100000	1253000000	1971600000
tr|Q4CPV7|Q4CPV7_TRYCC	tr|Q4CPV7|Q4CPV7_TRYCC	8	8	8	>tr|Q4CPV7|Q4CPV7_TRYCC Eukaryotic translation initiation factor 2 subunit, putative OS=Trypanosoma cruzi (strain CL Brener) GN=Tc00.1047053503819.30 PE=4 SV=1	1	8	8	8	25	5	4	8	8	5	4	8	8	5	4	8	8	27	27	27	52579	477	477	1	76	0	41141	By MS/MS	By MS/MS	By MS/MS	By MS/MS	By MS/MS	By MS/MS	16.6	13.4	9	9	27	27	7862100000	1194000000	1493000000	1456100000	2576700000
tr|Q4DMB4|Q4DMB4_TRYCC;tr|Q4DFR9|Q4DFR9_TRYCC	tr|Q4DMB4|Q4DMB4_TRYCC;tr|Q4DFR9|Q4DFR9_TRYCC	7;7	7;7	7;7	>tr|Q4DMB4|Q4DMB4_TRYCC Mitochondrial carrier protein, putative OS=Trypanosoma cruzi (strain CL Brener) GN=Tc00.1047053504131.190 PE=3 SV=1;>tr|Q4DFR9|Q4DFR9_TRYCC Mitochondrial carrier protein, putative OS=Trypanosoma cruzi (strain CL Brener) GN=Tc00.1047	2	7	7	7	25	6	6	6	7	6	6	6	7	6	6	6	7	25.6	25.6	25.6	31.51	293	293;293	1	67	0	27127	By MS/MS	By MS/MS	By MS/MS	By MS/MS	By MS/MS	By MS/MS	22.9	21.5	20.1	22.9	22.9	25.6	4546300000	826430000	1155300000	558390000	988360000
tr|Q4D2U8|Q4D2U8_TRYCC	tr|Q4D2U8|Q4D2U8_TRYCC	9	9	4	>tr|Q4D2U8|Q4D2U8_TRYCC UTP-glucose-1-phosphate uridylyltransferase 2, putative OS=Trypanosoma cruzi (strain CL Brener) GN=Tc00.1047053506359.60 PE=4 SV=1	1	9	9	4	25	5	6	7	7	5	6	7	7	3	3	2	3	29.7	29.7	16	53476	482	482	1	130	0	47198	By MS/MS	By MS/MS	By MS/MS	By MS/MS	By MS/MS	By MS/MS	18	21.6	23.4	21	24.1	24.9	8016300000	1406900000	1821100000	1191700000	1661000000
tr|Q4DK47|Q4DK47_TRYCC	tr|Q4DK47|Q4DK47_TRYCC	8	8	8	>tr|Q4DK47|Q4DK47_TRYCC Membrane-bound acid phosphatase, putative (Fragment) OS=Trypanosoma cruzi (strain CL Brener) GN=Tc00.1047053508827.10 PE=4 SV=1	1	8	8	8	25	7	6	6	6	7	6	6	6	7	6	6	6	61.2	61.2	61.2	23896	227	227	1	64	0	89958	By MS/MS	By MS/MS	By MS/MS	By MS/MS	By MS/MS	By MS/MS	49.8	45.4	44.1	53.7	49.3	56.4	2095400000	392770000	586610000	292040000	590880000
sp|Q4E657|PFKA_TRYCC	sp|Q4E657|PFKA_TRYCC	7	7	7	>sp|Q4E657|PFKA_TRYCC ATP-dependent 6-phosphofructokinase OS=Trypanosoma cruzi (strain CL Brener) GN=pfk PE=1 SV=1	1	7	7	7	25	5	7	7	6	5	7	7	6	5	7	7	6	20	20	20	53565	485	485	1	76	0	69414	By MS/MS	By MS/MS	By MS/MS	By MS/MS	By MS/MS	By MS/MS	12.6	20	8.2	8.2	20	17.9	5737200000	1208900000	1294900000	1009700000	1171700000
tr|Q4DVU1|Q4DVU1_TRYCC	tr|Q4DVU1|Q4DVU1_TRYCC	7	7	2	>tr|Q4DVU1|Q4DVU1_TRYCC Uncharacterized protein OS=Trypanosoma cruzi (strain CL Brener) GN=Tc00.1047053511751.210 PE=4 SV=1	1	7	7	2	25	6	7	5	7	6	7	5	7	2	2	2	2	41.6	41.6	12.6	29629	269	269	1	102	0	109.18	By MS/MS	By MS/MS	By MS/MS	By MS/MS	By MS/MS	By MS/MS	35.7	41.6	35.7	35.7	30.5	41.6	3326700000	518390000	764040000	510390000	826820000
tr|Q4DV61|Q4DV61_TRYCC	tr|Q4DV61|Q4DV61_TRYCC	7	7	7	>tr|Q4DV61|Q4DV61_TRYCC Uncharacterized protein OS=Trypanosoma cruzi (strain CL Brener) GN=Tc00.1047053508173.264 PE=4 SV=1	1	7	7	7	25	6	5	7	7	6	5	7	7	6	5	7	7	29.9	29.9	29.9	33745	311	311	1	81	0	30179	By MS/MS	By MS/MS	By MS/MS	By MS/MS	By MS/MS	By MS/MS	23.5	19.9	23.5	23.5	29.9	29.9	3811600000	590410000	841070000	582220000	1128300000
tr|Q4CN04|Q4CN04_TRYCC	tr|Q4CN04|Q4CN04_TRYCC	9	9	3	>tr|Q4CN04|Q4CN04_TRYCC Glutamine synthetase, putative OS=Trypanosoma cruzi (strain CL Brener) GN=Tc00.1047053503405.10 PE=3 SV=1	1	9	9	3	25	4	4	9	8	4	4	9	8	0	0	3	3	36.3	36.3	15.7	47716	421	421	1	61	0	94911	By MS/MS	By MS/MS	By MS/MS	By MS/MS	By MS/MS	By MS/MS	13.8	13.8	13.8	11.6	36.3	32.1	4676500000	582280000	847870000	1090600000	1402600000
tr|Q4DHV9|Q4DHV9_TRYCC	tr|Q4DHV9|Q4DHV9_TRYCC	9	9	9	>tr|Q4DHV9|Q4DHV9_TRYCC Nucleolar RNA-binding protein, putative OS=Trypanosoma cruzi (strain CL Brener) GN=Tc00.1047053507649.80 PE=4 SV=1	1	9	9	9	25	5	7	5	8	5	7	5	8	5	7	5	8	60.8	60.8	60.8	40999	362	362	1	86	0	178.14	By MS/MS	By MS/MS	By MS/MS	By MS/MS	By MS/MS	By MS/MS	30.9	56.1	34	26.5	30.4	57.7	6524900000	821460000	1079500000	1390300000	2483500000
tr|Q4CZR2|Q4CZR2_TRYCC;tr|Q4DDU0|Q4DDU0_TRYCC	tr|Q4CZR2|Q4CZR2_TRYCC;tr|Q4DDU0|Q4DDU0_TRYCC	7;6	7;6	7;6	>tr|Q4CZR2|Q4CZR2_TRYCC Splicing factor TSR1, putative OS=Trypanosoma cruzi (strain CL Brener) GN=Tc00.1047053503715.10 PE=4 SV=1;>tr|Q4DDU0|Q4DDU0_TRYCC Splicing factor TSR1, putative OS=Trypanosoma cruzi (strain CL Brener) GN=Tc00.1047053509607.30 PE=4 S	2	7	7	7	25	6	6	6	7	6	6	6	7	6	6	6	7	27.1	27.1	27.1	34666	303	303;301	1	83	0	47445	By MS/MS	By MS/MS	By MS/MS	By MS/MS	By MS/MS	By MS/MS	26.7	26.7	22.1	22.1	24.4	27.1	3854900000	491410000	685230000	782590000	1473600000
tr|Q4DPP4|Q4DPP4_TRYCC	tr|Q4DPP4|Q4DPP4_TRYCC	7	4	4	>tr|Q4DPP4|Q4DPP4_TRYCC Protein tyrosine phosphatase, putative OS=Trypanosoma cruzi (strain CL Brener) GN=Tc00.1047053506743.110 PE=4 SV=1	1	7	4	4	25	7	6	5	7	4	3	2	4	4	3	2	4	50.6	25	25	19671	180	180	1	45	0	20319	By MS/MS	By MS/MS	By MS/MS	By MS/MS	By MS/MS	By MS/MS	50.6	43.3	36.1	50.6	42.2	50.6	1351700000	250240000	277830000	104940000	473880000
tr|Q4DNH8|Q4DNH8_TRYCC	tr|Q4DNH8|Q4DNH8_TRYCC	7	1	1	>tr|Q4DNH8|Q4DNH8_TRYCC Uncharacterized protein (Fragment) OS=Trypanosoma cruzi (strain CL Brener) GN=Tc00.1047053509791.189 PE=4 SV=1	1	7	1	1	25	6	5	7	7	1	1	1	1	1	1	1	1	41.3	14.1	14.1	23032	213	213	1	40	0	10933	By MS/MS	By MS/MS	By MS/MS	By MS/MS	By MS/MS	By MS/MS	36.2	31	36.2	36.2	41.3	41.3	2393900000	323790000	332460000	338150000	608830000
tr|Q4DA30|Q4DA30_TRYCC	tr|Q4DA30|Q4DA30_TRYCC	7	7	3	>tr|Q4DA30|Q4DA30_TRYCC Uncharacterized protein OS=Trypanosoma cruzi (strain CL Brener) GN=Tc00.1047053506947.10 PE=4 SV=1	1	7	7	3	25	7	6	6	6	7	6	6	6	3	2	2	3	11.2	11.2	4.8	67026	605	605	1	76	0	64893	By MS/MS	By MS/MS	By MS/MS	By MS/MS	By MS/MS	By MS/MS	11.2	11.2	8.4	11.2	11.2	8.4	2023400000	304200000	510180000	287150000	428520000
tr|Q4DQH9|Q4DQH9_TRYCC	tr|Q4DQH9|Q4DQH9_TRYCC	8	8	1	>tr|Q4DQH9|Q4DQH9_TRYCC Alkyl-dihydroxyacetone phosphate synthase, putative OS=Trypanosoma cruzi (strain CL Brener) GN=Tc00.1047053505807.110 PE=4 SV=1	1	8	8	1	25	6	5	7	7	6	5	7	7	0	0	1	1	16.5	16.5	4.2	69381	613	613	1	71	0	15297	By MS/MS	By MS/MS	By MS/MS	By MS/MS	By MS/MS	By MS/MS	10.1	8	11.1	7.3	15.3	14.4	4031600000	648850000	955040000	578160000	1061100000
tr|Q4E2L0|Q4E2L0_TRYCC	tr|Q4E2L0|Q4E2L0_TRYCC	9	9	9	>tr|Q4E2L0|Q4E2L0_TRYCC Serine/threonine protein kinase, putative OS=Trypanosoma cruzi (strain CL Brener) GN=Tc00.1047053508479.150 PE=3 SV=1	1	9	9	9	25	5	5	9	6	5	5	9	6	5	5	9	6	26.4	26.4	26.4	55058	474	474	1	74	0	43.07	By MS/MS	By MS/MS	By MS/MS	By MS/MS	By MS/MS	By MS/MS	13.1	15	20.5	12.4	26.4	16.5	2655500000	309490000	521770000	770200000	793060000
tr|Q4CWE6|Q4CWE6_TRYCC	tr|Q4CWE6|Q4CWE6_TRYCC	7	2	2	>tr|Q4CWE6|Q4CWE6_TRYCC C-1-tetrahydrofolate synthase, cytoplasmic, putative OS=Trypanosoma cruzi (strain CL Brener) GN=Tc00.1047053509509.20 PE=3 SV=1	1	7	2	2	25	5	6	7	7	2	2	2	2	2	2	2	2	31.6	6.4	6.4	31548	297	297	1	33	0	20957	By MS/MS	By MS/MS	By MS/MS	By MS/MS	By MS/MS	By MS/MS	25.9	26.3	25.9	19.5	31.6	31.6	898710000	186350000	230970000	119460000	128640000
tr|Q4CXW9|Q4CXW9_TRYCC	tr|Q4CXW9|Q4CXW9_TRYCC	9	9	3	>tr|Q4CXW9|Q4CXW9_TRYCC Eukaryotic release factor 3, putative OS=Trypanosoma cruzi (strain CL Brener) GN=Tc00.1047053508041.60 PE=4 SV=1	1	9	9	3	25	5	5	7	8	5	5	7	8	1	1	3	3	12.5	12.5	6.2	75056	680	680	1	66	0	93844	By MS/MS	By MS/MS	By MS/MS	By MS/MS	By MS/MS	By MS/MS	8.2	8.2	4.7	11.3	11.5	11.5	2682300000	327780000	499410000	513730000	969800000
tr|Q4CPQ7|Q4CPQ7_TRYCC	tr|Q4CPQ7|Q4CPQ7_TRYCC	7	7	3	>tr|Q4CPQ7|Q4CPQ7_TRYCC Uncharacterized protein (Fragment) OS=Trypanosoma cruzi (strain CL Brener) GN=Tc00.1047053510977.9 PE=4 SV=1	1	7	7	3	25	6	7	6	6	6	7	6	6	2	3	2	3	10.8	10.8	5.4	79.85	765	765	1	63	0	45662	By MS/MS	By MS/MS	By MS/MS	By MS/MS	By MS/MS	By MS/MS	9.4	10.8	6.4	10.8	9.4	9.5	1853900000	235620000	643950000	226940000	392410000
tr|Q4D7F9|Q4D7F9_TRYCC;tr|Q4D4C4|Q4D4C4_TRYCC	tr|Q4D7F9|Q4D7F9_TRYCC;tr|Q4D4C4|Q4D4C4_TRYCC	7;7	7;7	7;7	>tr|Q4D7F9|Q4D7F9_TRYCC Glutamyl-tRNA synthetase, putative OS=Trypanosoma cruzi (strain CL Brener) GN=Tc00.1047053511731.60 PE=3 SV=1;>tr|Q4D4C4|Q4D4C4_TRYCC Glutamyl-tRNA synthetase, putative OS=Trypanosoma cruzi (strain CL Brener) GN=Tc00.1047053506831.7	2	7	7	7	25	7	6	6	6	7	6	6	6	7	6	6	6	14.7	14.7	14.7	68719	600	600;600	1	76	0	44551	By MS/MS	By MS/MS	By MS/MS	By MS/MS	By MS/MS	By MS/MS	14.7	12.2	10.8	14.7	12.5	13	1900800000	362470000	305990000	351390000	528370000
tr|Q4DHS1|Q4DHS1_TRYCC	tr|Q4DHS1|Q4DHS1_TRYCC	10	10	4	>tr|Q4DHS1|Q4DHS1_TRYCC Gamma-glutamylcysteine synthetase, putative OS=Trypanosoma cruzi (strain CL Brener) GN=Tc00.1047053507787.100 PE=4 SV=1	1	10	10	4	25	5	6	7	7	5	6	7	7	3	3	2	2	20.3	20.3	8.1	79384	693	693	1	63	0	23612	By MS/MS	By MS/MS	By MS/MS	By MS/MS	By MS/MS	By MS/MS	11	12.7	13.9	12.7	14.1	14.1	1675400000	281920000	275200000	339330000	472780000
tr|Q4DHA3|Q4DHA3_TRYCC	tr|Q4DHA3|Q4DHA3_TRYCC	7	4	4	>tr|Q4DHA3|Q4DHA3_TRYCC Uncharacterized protein OS=Trypanosoma cruzi (strain CL Brener) GN=Tc00.1047053511285.30 PE=4 SV=1	1	7	4	4	25	6	6	6	7	3	3	3	4	3	3	3	4	23.7	16.2	16.2	47935	427	427	1	51	0	84596	By MS/MS	By MS/MS	By MS/MS	By MS/MS	By MS/MS	By MS/MS	17.8	17.8	17.8	17.8	21.5	23.7	1646000000	336360000	220450000	285580000	270870000
tr|Q4DSS9|Q4DSS9_TRYCC;tr|Q4DIR4|Q4DIR4_TRYCC	tr|Q4DSS9|Q4DSS9_TRYCC;tr|Q4DIR4|Q4DIR4_TRYCC	8;7	8;7	8;7	>tr|Q4DSS9|Q4DSS9_TRYCC Ribose-phosphate pyrophosphokinase, putative OS=Trypanosoma cruzi (strain CL Brener) GN=Tc00.1047053507809.30 PE=4 SV=1;>tr|Q4DIR4|Q4DIR4_TRYCC Ribose-phosphate pyrophosphokinase, putative OS=Trypanosoma cruzi (strain CL Brener) GN=	2	8	8	8	25	7	4	7	7	7	4	7	7	7	4	7	7	15	15	15	78929	705	705;705	1	70	0	44143	By MS/MS	By MS/MS	By MS/MS	By MS/MS	By MS/MS	By MS/MS	13	8.4	11.5	13	13.3	13.3	2136400000	378900000	350280000	387850000	571470000
tr|Q4E2Y4|Q4E2Y4_TRYCC	tr|Q4E2Y4|Q4E2Y4_TRYCC	8	5	5	>tr|Q4E2Y4|Q4E2Y4_TRYCC Uncharacterized protein OS=Trypanosoma cruzi (strain CL Brener) GN=Tc00.1047053508175.100 PE=4 SV=1	1	8	5	5	25	5	5	7	8	3	3	4	5	3	3	4	5	20	15.3	15.3	65976	580	580	1	41	0	20455	By MS/MS	By MS/MS	By MS/MS	By MS/MS	By MS/MS	By MS/MS	9.3	9.3	6.6	6.6	15.7	20	1380600000	222530000	240260000	341310000	545290000
tr|Q4DM85|Q4DM85_TRYCC	tr|Q4DM85|Q4DM85_TRYCC	9	3	3	>tr|Q4DM85|Q4DM85_TRYCC Peptidylprolyl isomerase OS=Trypanosoma cruzi (strain CL Brener) GN=Tc00.1047053511301.70 PE=4 SV=1	1	9	3	3	25	5	4	8	8	1	1	3	3	1	1	3	3	32.2	11.3	11.3	48326	426	426	1	35	0	14401	By MS/MS	By MS/MS	By MS/MS	By MS/MS	By MS/MS	By MS/MS	20.2	13.4	20.2	22.5	29.8	29.8	1251900000	173480000	233390000	225380000	420420000
tr|Q4D4G9|Q4D4G9_TRYCC	tr|Q4D4G9|Q4D4G9_TRYCC	7	1	1	>tr|Q4D4G9|Q4D4G9_TRYCC Heat shock protein-like protein, putative OS=Trypanosoma cruzi (strain CL Brener) GN=Tc00.1047053508443.20 PE=4 SV=1	1	7	1	1	25	5	7	7	6	1	1	1	1	1	1	1	1	33.5	7.8	7.8	35892	319	319	1	15	0	17515	By MS/MS	By MS/MS	By MS/MS	By MS/MS	By MS/MS	By MS/MS	27.3	33.5	33.5	31	33.5	29.2	557910000	88380000	143180000	61622000	113440000
tr|Q4E689|Q4E689_TRYCC;tr|Q4CPW0|Q4CPW0_TRYCC	tr|Q4E689|Q4E689_TRYCC	8;3	8;3	8;3	>tr|Q4E689|Q4E689_TRYCC Dynamin, putative OS=Trypanosoma cruzi (strain CL Brener) GN=Tc00.1047053508153.20 PE=3 SV=1	2	8	8	8	25	6	6	7	6	6	6	7	6	6	6	7	6	15.9	15.9	15.9	72847	653	653;282	1	71	0	24899	By MS/MS	By MS/MS	By matching	By matching	By MS/MS	By MS/MS	11.6	11.6	8.9	9.2	15.9	12.9	1790000000	164340000	398780000	439500000	641270000
tr|Q4DPZ5|Q4DPZ5_TRYCC	tr|Q4DPZ5|Q4DPZ5_TRYCC	8	3	3	>tr|Q4DPZ5|Q4DPZ5_TRYCC Uncharacterized protein OS=Trypanosoma cruzi (strain CL Brener) GN=Tc00.1047053509179.100 PE=4 SV=1	1	8	3	3	25	6	7	6	6	2	3	2	1	2	3	2	1	21.2	9.9	9.9	56969	505	505	1	32	0	31697	By matching	By MS/MS	By matching	By matching	By MS/MS	By MS/MS	15.6	18	12.5	12.5	15.6	14.7	708600000	84501000	189650000	116470000	156240000
tr|Q4D7G6|Q4D7G6_TRYCC	tr|Q4D7G6|Q4D7G6_TRYCC	9	2	2	>tr|Q4D7G6|Q4D7G6_TRYCC UV excision repair RAD23-like protein, putative OS=Trypanosoma cruzi (strain CL Brener) GN=Tc00.1047053511731.10 PE=4 SV=1	1	9	2	2	25	5	5	8	7	1	1	2	2	1	1	2	2	34.1	3.6	3.6	38893	361	361	1	13	0	36878	By matching	By MS/MS	By MS/MS	By MS/MS	By MS/MS	By MS/MS	18.3	18.3	21.1	18.3	28.8	23.5	430680000	41582000	99790000	66084000	129330000
tr|Q4D498|Q4D498_TRYCC	tr|Q4D498|Q4D498_TRYCC	9	9	2	>tr|Q4D498|Q4D498_TRYCC Uncharacterized protein OS=Trypanosoma cruzi (strain CL Brener) GN=Tc00.1047053508809.40 PE=4 SV=1	1	9	9	2	25	5	7	7	6	5	7	7	6	0	0	1	1	13	13	2.9	113.68	1018	1018	1	45	0	46.21	By MS/MS	By MS/MS	By MS/MS	By MS/MS	By MS/MS	By MS/MS	6.2	10	7.6	3.2	9.9	9.6	905200000	157550000	248670000	125610000	228460000
tr|Q4E0D6|Q4E0D6_TRYCC	tr|Q4E0D6|Q4E0D6_TRYCC	8	3	3	>tr|Q4E0D6|Q4E0D6_TRYCC Calpain cysteine peptidase, putative OS=Trypanosoma cruzi (strain CL Brener) GN=Tc00.1047053508999.220 PE=3 SV=1	1	8	3	3	25	7	6	6	6	3	2	2	2	3	2	2	2	16.2	5.1	5.1	82459	729	729	1	27	0	58902	By MS/MS	By MS/MS	By matching	By MS/MS	By MS/MS	By matching	13.6	13.3	9.5	13.3	14.7	13.3	683870000	130500000	186480000	48641000	130490000
tr|Q4DNC1|Q4DNC1_TRYCC;tr|Q4DPC6|Q4DPC6_TRYCC	tr|Q4DNC1|Q4DNC1_TRYCC;tr|Q4DPC6|Q4DPC6_TRYCC	10;9	10;9	10;9	>tr|Q4DNC1|Q4DNC1_TRYCC Uncharacterized protein OS=Trypanosoma cruzi (strain CL Brener) GN=Tc00.1047053507521.140 PE=4 SV=1;>tr|Q4DPC6|Q4DPC6_TRYCC Uncharacterized protein OS=Trypanosoma cruzi (strain CL Brener) GN=Tc00.1047053508577.60 PE=4 SV=1	2	10	10	10	25	2	6	7	10	2	6	7	10	2	6	7	10	18.3	18.3	18.3	78.64	698	698;693	1	59	0	29.15	By MS/MS	By MS/MS	By matching	By MS/MS	By MS/MS	By MS/MS	2.9	10.9	2.9	8.7	11.7	18.3	1010300000	74364000	178700000	183030000	407610000
tr|Q4DDF3|Q4DDF3_TRYCC	tr|Q4DDF3|Q4DDF3_TRYCC	9	2	2	>tr|Q4DDF3|Q4DDF3_TRYCC Chaperonin/T-complex protein 1 gamma subunit, putative (Fragment) OS=Trypanosoma cruzi (strain CL Brener) GN=Tc00.1047053510517.10 PE=4 SV=1	1	9	2	2	25	5	5	7	8	1	1	1	1	1	1	1	1	42.6	9.4	9.4	26324	244	244	1	9	0	34425	By matching	By matching	By matching	By MS/MS	By MS/MS	By matching	26.2	26.2	18	13.5	37.3	37.7	221900000	21097000	24249000	54816000	69888000
tr|Q4CRU8|Q4CRU8_TRYCC	tr|Q4CRU8|Q4CRU8_TRYCC	8	1	1	>tr|Q4CRU8|Q4CRU8_TRYCC Alkyl-dihydroxyacetone phosphate synthase, putative OS=Trypanosoma cruzi (strain CL Brener) GN=Tc00.1047053503815.10 PE=4 SV=1	1	8	1	1	25	6	5	7	7	0	0	1	1	0	0	1	1	16.5	4.2	4.2	69316	613	613	1	3	0	39699	By matching	By matching	By matching	By matching	By MS/MS	By MS/MS	10.1	8	11.1	7.3	15.3	14.4	88485000	0	0	0	88485000
tr|Q4CQG8|Q4CQG8_TRYCC;tr|Q4CY42|Q4CY42_TRYCC	tr|Q4CQG8|Q4CQG8_TRYCC;tr|Q4CY42|Q4CY42_TRYCC	7;6	7;6	7;6	>tr|Q4CQG8|Q4CQG8_TRYCC Uncharacterized protein OS=Trypanosoma cruzi (strain CL Brener) GN=Tc00.1047053511479.39 PE=4 SV=1;>tr|Q4CY42|Q4CY42_TRYCC Uncharacterized protein OS=Trypanosoma cruzi (strain CL Brener) GN=Tc00.1047053504005.54 PE=4 SV=1	2	7	7	7	24	5	6	7	6	5	6	7	6	5	6	7	6	81.3	81.3	81.3	12252	107	107;107	1	133	0	88903	By MS/MS	By MS/MS	By MS/MS	By MS/MS	By MS/MS	By MS/MS	55.1	80.4	81.3	81.3	81.3	56.1	9166100000	815520000	3349400000	1590300000	1429900000
tr|Q4DRQ7|Q4DRQ7_TRYCC;tr|Q4D7A0|Q4D7A0_TRYCC;tr|Q4CVX1|Q4CVX1_TRYCC	tr|Q4DRQ7|Q4DRQ7_TRYCC;tr|Q4D7A0|Q4D7A0_TRYCC;tr|Q4CVX1|Q4CVX1_TRYCC	6;6;6	6;6;6	2;2;2	>tr|Q4DRQ7|Q4DRQ7_TRYCC 60S ribosomal protein L13a, putative OS=Trypanosoma cruzi (strain CL Brener) GN=Tc00.1047053506739.150 PE=3 SV=1;>tr|Q4D7A0|Q4D7A0_TRYCC 60S ribosomal protein L13a, putative OS=Trypanosoma cruzi (strain CL Brener) GN=Tc00.1047053506	3	6	6	2	24	6	6	6	6	6	6	6	6	2	2	2	2	23.9	23.9	8.6	25599	222	222;222;282	1	93	0	40329	By MS/MS	By MS/MS	By MS/MS	By MS/MS	By MS/MS	By MS/MS	23.9	23.9	23.9	23.9	23.9	23.9	18803000000	3189500000	3903700000	3616700000	5112300000
tr|Q4DZS6|Q4DZS6_TRYCC;tr|Q4CP97|Q4CP97_TRYCC	tr|Q4DZS6|Q4DZS6_TRYCC;tr|Q4CP97|Q4CP97_TRYCC	6;6	6;6	6;6	>tr|Q4DZS6|Q4DZS6_TRYCC Uncharacterized protein OS=Trypanosoma cruzi (strain CL Brener) GN=Tc00.1047053507711.20 PE=4 SV=1;>tr|Q4CP97|Q4CP97_TRYCC Uncharacterized protein OS=Trypanosoma cruzi (strain CL Brener) GN=Tc00.1047053424123.20 PE=4 SV=1	2	6	6	6	24	6	6	6	6	6	6	6	6	6	6	6	6	54	54	54	14272	126	126;126	1	123	0	171.86	By MS/MS	By MS/MS	By MS/MS	By MS/MS	By MS/MS	By MS/MS	54	54	54	54	54	54	12509000000	2177300000	2919300000	1527700000	2516100000
tr|Q4DDK8|Q4DDK8_TRYCC	tr|Q4DDK8|Q4DDK8_TRYCC	6	6	1	>tr|Q4DDK8|Q4DDK8_TRYCC Glycosomal malate dehydrogenase, putative OS=Trypanosoma cruzi (strain CL Brener) GN=Tc00.1047053511293.69 PE=3 SV=1	1	6	6	1	24	6	6	6	6	6	6	6	6	1	1	1	1	26.6	26.6	8.7	34085	323	323	1	83	0	303.77	By MS/MS	By MS/MS	By MS/MS	By MS/MS	By MS/MS	By MS/MS	26.6	26.6	19.8	19.8	26.6	26.6	14272000000	2120400000	3083400000	3027500000	4164700000
tr|Q4D2M6|Q4D2M6_TRYCC	tr|Q4D2M6|Q4D2M6_TRYCC	8	8	4	>tr|Q4D2M6|Q4D2M6_TRYCC Haloacid dehalogenase-like hydrolase, putative OS=Trypanosoma cruzi (strain CL Brener) GN=Tc00.1047053506931.10 PE=4 SV=1	1	8	8	4	24	5	4	7	8	5	4	7	8	3	3	3	4	36.7	36.7	21.5	34734	311	311	1	100	0	163.97	By MS/MS	By MS/MS	By MS/MS	By MS/MS	By MS/MS	By MS/MS	26	22.5	22.5	26	31.5	36.7	15098000000	2355800000	2693800000	3230200000	4764300000
tr|Q4E3R2|Q4E3R2_TRYCC	tr|Q4E3R2|Q4E3R2_TRYCC	8	8	1	>tr|Q4E3R2|Q4E3R2_TRYCC 60S ribosomal protein L7a, putative OS=Trypanosoma cruzi (strain CL Brener) GN=Tc00.1047053506401.320 PE=4 SV=1	1	8	8	1	24	4	5	8	7	4	5	8	7	1	1	1	1	19.7	19.7	6.3	34871	319	319	1	101	0	144.72	By MS/MS	By MS/MS	By MS/MS	By MS/MS	By MS/MS	By MS/MS	12.9	15	10	12.9	19.7	19.4	14269000000	1912700000	1925800000	3260200000	5702300000
tr|Q4CUY3|Q4CUY3_TRYCC;tr|Q4D2G4|Q4D2G4_TRYCC;tr|Q4CKY4|Q4CKY4_TRYCC	tr|Q4CUY3|Q4CUY3_TRYCC;tr|Q4D2G4|Q4D2G4_TRYCC;tr|Q4CKY4|Q4CKY4_TRYCC	6;6;3	5;5;2	5;5;2	>tr|Q4CUY3|Q4CUY3_TRYCC Peptidyl-prolyl cis-trans isomerase OS=Trypanosoma cruzi (strain CL Brener) GN=Tc00.1047053510259.50 PE=3 SV=1;>tr|Q4D2G4|Q4D2G4_TRYCC Peptidyl-prolyl cis-trans isomerase OS=Trypanosoma cruzi (strain CL Brener) GN=Tc00.1047053509215	3	6	5	5	24	6	6	6	6	5	5	5	5	5	5	5	5	26	22.4	22.4	21402	196	196;210;129	1	58	0	61419	By MS/MS	By MS/MS	By MS/MS	By MS/MS	By MS/MS	By MS/MS	26	26	26	26	26	26	6842700000	1241500000	1673600000	928600000	1703200000
tr|Q4E2P8|Q4E2P8_TRYCC	tr|Q4E2P8|Q4E2P8_TRYCC	6	6	1	>tr|Q4E2P8|Q4E2P8_TRYCC Succinyl-CoA:3-ketoacid-coenzyme A transferase OS=Trypanosoma cruzi (strain CL Brener) GN=Tc00.1047053504153.360 PE=3 SV=1	1	6	6	1	24	6	6	6	6	6	6	6	6	1	1	1	1	16.9	16.9	2.9	52797	491	491	1	126	0	74984	By MS/MS	By MS/MS	By MS/MS	By MS/MS	By MS/MS	By MS/MS	16.9	16.9	14.7	14.7	16.9	16.9	14632000000	2467400000	2298700000	2854600000	4807100000
tr|Q4CRW7|Q4CRW7_TRYCC;tr|Q4DF40|Q4DF40_TRYCC	tr|Q4CRW7|Q4CRW7_TRYCC;tr|Q4DF40|Q4DF40_TRYCC	7;4	7;4	3;1	>tr|Q4CRW7|Q4CRW7_TRYCC Uncharacterized protein (Fragment) OS=Trypanosoma cruzi (strain CL Brener) GN=Tc00.1047053511691.39 PE=4 SV=1;>tr|Q4DF40|Q4DF40_TRYCC Uncharacterized protein OS=Trypanosoma cruzi (strain CL Brener) GN=Tc00.1047053508177.90 PE=4 SV=1	2	7	7	3	24	6	5	7	6	6	5	7	6	2	1	3	2	26	26	11.2	36849	339	339;398	1	84	0	54283	By MS/MS	By MS/MS	By MS/MS	By MS/MS	By MS/MS	By MS/MS	26	19.5	11.2	19.5	26	26	7680100000	1432300000	1824900000	1273600000	1877300000
tr|Q4CUW6|Q4CUW6_TRYCC	tr|Q4CUW6|Q4CUW6_TRYCC	8	8	8	>tr|Q4CUW6|Q4CUW6_TRYCC Uncharacterized protein OS=Trypanosoma cruzi (strain CL Brener) GN=Tc00.1047053507777.20 PE=4 SV=1	1	8	8	8	24	6	5	6	7	6	5	6	7	6	5	6	7	85.1	85.1	85.1	11.77	101	101	1	138	0	54316	By MS/MS	By MS/MS	By MS/MS	By MS/MS	By MS/MS	By MS/MS	72.3	53.5	56.4	74.3	71.3	74.3	3137300000	447140000	705520000	525420000	559230000
tr|Q4E1M8|Q4E1M8_TRYCC	tr|Q4E1M8|Q4E1M8_TRYCC	7	7	7	>tr|Q4E1M8|Q4E1M8_TRYCC Uncharacterized protein OS=Trypanosoma cruzi (strain CL Brener) GN=Tc00.1047053507093.300 PE=4 SV=1	1	7	7	7	24	5	6	7	6	5	6	7	6	5	6	7	6	30.4	30.4	30.4	30399	273	273	1	92	0	61.01	By MS/MS	By MS/MS	By MS/MS	By MS/MS	By MS/MS	By MS/MS	21.6	21.6	21.6	21.6	30.4	30.4	7012400000	930990000	963830000	1198400000	2614700000
tr|Q4CVJ5|Q4CVJ5_TRYCC	tr|Q4CVJ5|Q4CVJ5_TRYCC	8	8	2	>tr|Q4CVJ5|Q4CVJ5_TRYCC Citrate synthase OS=Trypanosoma cruzi (strain CL Brener) GN=Tc00.1047053509801.30 PE=3 SV=1	1	8	8	2	24	5	6	8	5	5	6	8	5	1	1	2	1	20.6	20.6	4.4	52436	472	472	1	76	0	77961	By MS/MS	By MS/MS	By MS/MS	By MS/MS	By MS/MS	By MS/MS	12.7	15.7	12.7	12.7	20.6	12.1	5723200000	568740000	1164000000	721690000	1156900000
tr|Q4DD17|Q4DD17_TRYCC	tr|Q4DD17|Q4DD17_TRYCC	7	7	2	>tr|Q4DD17|Q4DD17_TRYCC Aminopeptidase, putative OS=Trypanosoma cruzi (strain CL Brener) GN=Tc00.1047053511289.30 PE=4 SV=1	1	7	7	2	24	6	4	7	7	6	4	7	7	2	2	2	2	28.1	28.1	7.6	42501	381	381	1	76	0	15504	By MS/MS	By MS/MS	By MS/MS	By MS/MS	By MS/MS	By MS/MS	23.1	13.4	13.1	14.4	28.1	28.1	4254600000	542630000	682620000	1027300000	1513100000
tr|Q4DEX7|Q4DEX7_TRYCC;tr|Q4D4Y3|Q4D4Y3_TRYCC	tr|Q4DEX7|Q4DEX7_TRYCC;tr|Q4D4Y3|Q4D4Y3_TRYCC	6;6	6;6	6;6	>tr|Q4DEX7|Q4DEX7_TRYCC Uncharacterized protein OS=Trypanosoma cruzi (strain CL Brener) GN=Tc00.1047053510515.30 PE=4 SV=1;>tr|Q4D4Y3|Q4D4Y3_TRYCC Uncharacterized protein OS=Trypanosoma cruzi (strain CL Brener) GN=Tc00.1047053509859.10 PE=4 SV=1	2	6	6	6	24	6	6	6	6	6	6	6	6	6	6	6	6	19	19	19	40384	364	364;364	1	80	0	43064	By MS/MS	By MS/MS	By MS/MS	By MS/MS	By MS/MS	By MS/MS	19	19	14	19	19	19	3381500000	577570000	742880000	431710000	971170000
tr|Q4E268|Q4E268_TRYCC;tr|Q4DCR8|Q4DCR8_TRYCC	tr|Q4E268|Q4E268_TRYCC	7;2	7;2	7;2	>tr|Q4E268|Q4E268_TRYCC Proteasome regulatory non-ATPase subunit 7, putative OS=Trypanosoma cruzi (strain CL Brener) GN=Tc00.1047053508707.90 PE=4 SV=1	2	7	7	7	24	5	6	7	6	5	6	7	6	5	6	7	6	14.7	14.7	14.7	46264	402	402;178	1	87	0	13118	By MS/MS	By MS/MS	By MS/MS	By MS/MS	By MS/MS	By MS/MS	14.7	14.7	14.7	14.7	14.7	14.7	3456400000	564210000	844930000	484610000	905610000
tr|Q4DSL4|Q4DSL4_TRYCC	tr|Q4DSL4|Q4DSL4_TRYCC	8	8	5	>tr|Q4DSL4|Q4DSL4_TRYCC Uncharacterized protein OS=Trypanosoma cruzi (strain CL Brener) GN=Tc00.1047053511303.34 PE=4 SV=1	1	8	8	5	24	6	6	5	7	6	6	5	7	4	4	4	5	44.1	44.1	31	32.41	297	297	1	68	0	85495	By MS/MS	By MS/MS	By MS/MS	By MS/MS	By MS/MS	By MS/MS	33	33	25.3	25.3	30.6	40.4	3144300000	569430000	608160000	491510000	811610000
tr|Q4DMG1|Q4DMG1_TRYCC	tr|Q4DMG1|Q4DMG1_TRYCC	8	8	3	>tr|Q4DMG1|Q4DMG1_TRYCC Short chain 3-hydroxyacyl-coa dehydrogenase, putative OS=Trypanosoma cruzi (strain CL Brener) GN=Tc00.1047053509717.90 PE=4 SV=1	1	8	8	3	24	6	5	7	6	6	5	7	6	2	3	2	3	30.9	30.9	9.1	35532	320	320	1	51	0	64467	By MS/MS	By MS/MS	By MS/MS	By MS/MS	By MS/MS	By MS/MS	20.6	15.6	14.1	14.1	28.4	19.1	3144400000	611820000	527180000	492440000	683220000
tr|Q4CLP9|Q4CLP9_TRYCC	tr|Q4CLP9|Q4CLP9_TRYCC	8	2	2	>tr|Q4CLP9|Q4CLP9_TRYCC Paraxonemal rod protein PAR2, putative (Fragment) OS=Trypanosoma cruzi (strain CL Brener) GN=Tc00.1047053434931.10 PE=4 SV=1	1	8	2	2	24	4	7	7	6	1	2	2	2	1	2	2	2	38.6	4.5	4.5	31355	264	264	1	19	0	25685	By MS/MS	By MS/MS	By MS/MS	By MS/MS	By MS/MS	By MS/MS	22	33	33	26.5	32.2	28.8	1707300000	269240000	503160000	136070000	252060000
tr|Q4DR32|Q4DR32_TRYCC	tr|Q4DR32|Q4DR32_TRYCC	7	7	7	>tr|Q4DR32|Q4DR32_TRYCC Electron transfer flavoprotein, putative OS=Trypanosoma cruzi (strain CL Brener) GN=Tc00.1047053504109.160 PE=4 SV=1	1	7	7	7	24	5	6	6	7	5	6	6	7	5	6	6	7	38.4	38.4	38.4	29758	268	268	1	92	0	118.16	By MS/MS	By MS/MS	By MS/MS	By MS/MS	By MS/MS	By MS/MS	25.4	33.2	33.2	20.1	33.2	38.4	3815400000	391160000	588180000	850160000	1490000000
tr|Q4CMC7|Q4CMC7_TRYCC;tr|Q4DZI9|Q4DZI9_TRYCC;tr|Q4DZI8|Q4DZI8_TRYCC;tr|Q4CMI4|Q4CMI4_TRYCC	tr|Q4CMC7|Q4CMC7_TRYCC	9;3;2;2	9;3;2;2	4;0;0;0	>tr|Q4CMC7|Q4CMC7_TRYCC Uncharacterized protein OS=Trypanosoma cruzi (strain CL Brener) GN=Tc00.1047053506551.10 PE=4 SV=1	4	9	9	4	24	5	7	6	6	5	7	6	6	1	2	1	2	19	19	9.7	68595	617	617;574;221;372	1	97	0	57555	By MS/MS	By MS/MS	By MS/MS	By MS/MS	By MS/MS	By MS/MS	11.8	15.9	14.6	14.9	10.7	12.5	4555800000	599160000	790220000	411550000	560840000
tr|Q4DD68|Q4DD68_TRYCC	tr|Q4DD68|Q4DD68_TRYCC	6	6	6	>tr|Q4DD68|Q4DD68_TRYCC Uncharacterized protein OS=Trypanosoma cruzi (strain CL Brener) GN=Tc00.1047053503975.50 PE=4 SV=1	1	6	6	6	24	6	6	6	6	6	6	6	6	6	6	6	6	10.2	10.2	10.2	71534	654	654	1	94	0	34663	By MS/MS	By MS/MS	By MS/MS	By MS/MS	By MS/MS	By MS/MS	10.2	10.2	10.2	10.2	10.2	10.2	3343800000	611860000	985690000	298370000	564250000
tr|Q4DAW6|Q4DAW6_TRYCC;tr|Q4CKY8|Q4CKY8_TRYCC	tr|Q4DAW6|Q4DAW6_TRYCC;tr|Q4CKY8|Q4CKY8_TRYCC	7;5	7;5	7;5	>tr|Q4DAW6|Q4DAW6_TRYCC Proteasome subunit alpha type OS=Trypanosoma cruzi (strain CL Brener) GN=Tc00.1047053504069.10 PE=3 SV=1;>tr|Q4CKY8|Q4CKY8_TRYCC Proteasome endopeptidase complex (Fragment) OS=Trypanosoma cruzi (strain CL Brener) GN=Tc00.10470534168	2	7	7	7	24	5	5	7	7	5	5	7	7	5	5	7	7	41.1	41.1	41.1	25053	231	231;179	1	70	0	33064	By MS/MS	By MS/MS	By MS/MS	By MS/MS	By MS/MS	By MS/MS	26.8	26.8	18.6	18.6	41.1	41.1	2832700000	243540000	459850000	657000000	1138200000
tr|Q4D734|Q4D734_TRYCC;tr|Q4CXI6|Q4CXI6_TRYCC	tr|Q4D734|Q4D734_TRYCC;tr|Q4CXI6|Q4CXI6_TRYCC	6;5	2;1	2;1	>tr|Q4D734|Q4D734_TRYCC Uncharacterized protein OS=Trypanosoma cruzi (strain CL Brener) GN=Tc00.1047053506163.50 PE=4 SV=1;>tr|Q4CXI6|Q4CXI6_TRYCC Uncharacterized protein OS=Trypanosoma cruzi (strain CL Brener) GN=Tc00.1047053508821.40 PE=4 SV=1	2	6	2	2	24	6	6	6	6	2	2	2	2	2	2	2	2	21.7	9.1	9.1	42676	396	396;396	1	48	0	28314	By MS/MS	By MS/MS	By MS/MS	By MS/MS	By MS/MS	By MS/MS	21.7	21.7	14.6	21.7	21.7	21.7	2872800000	541110000	525300000	397320000	834000000
tr|Q4D6K4|Q4D6K4_TRYCC	tr|Q4D6K4|Q4D6K4_TRYCC	7	7	2	>tr|Q4D6K4|Q4D6K4_TRYCC Uncharacterized protein OS=Trypanosoma cruzi (strain CL Brener) GN=Tc00.1047053505939.80 PE=4 SV=1	1	7	7	2	24	6	6	6	6	6	6	6	6	2	2	2	2	25.2	25.2	12.2	38512	345	345	1	85	0	52748	By MS/MS	By MS/MS	By MS/MS	By MS/MS	By MS/MS	By MS/MS	22.9	25.2	21.7	25.2	25.2	25.2	2774400000	390750000	470660000	416970000	745320000
tr|Q4CUM0|Q4CUM0_TRYCC;tr|Q4CRB3|Q4CRB3_TRYCC;tr|Q4D316|Q4D316_TRYCC	tr|Q4CUM0|Q4CUM0_TRYCC	9;3;1	9;3;1	9;3;1	>tr|Q4CUM0|Q4CUM0_TRYCC Paraflagellar rod component Par4, putative OS=Trypanosoma cruzi (strain CL Brener) GN=Tc00.1047053510353.30 PE=4 SV=1	3	9	9	9	24	5	6	7	6	5	6	7	6	5	6	7	6	17.9	17.9	17.9	68227	580	580;120;57	1	81	0	83975	By MS/MS	By MS/MS	By MS/MS	By MS/MS	By MS/MS	By MS/MS	11.7	11.7	13.4	11.7	15.9	13.4	3695700000	569890000	859310000	512710000	730000000
tr|Q4CZ83|Q4CZ83_TRYCC;tr|Q4CY81|Q4CY81_TRYCC;tr|Q4D2N5|Q4D2N5_TRYCC	tr|Q4CZ83|Q4CZ83_TRYCC;tr|Q4CY81|Q4CY81_TRYCC	9;5;3	9;5;3	9;5;3	>tr|Q4CZ83|Q4CZ83_TRYCC Axoneme central apparatus protein, putative OS=Trypanosoma cruzi (strain CL Brener) GN=Tc00.1047053510955.40 PE=4 SV=1;>tr|Q4CY81|Q4CY81_TRYCC Axoneme central apparatus protein, putative (Fragment) OS=Trypanosoma cruzi (strain CL Br	3	9	9	9	24	4	5	7	8	4	5	7	8	4	5	7	8	24.8	24.8	24.8	56289	513	513;313;150	1	71	0	17.45	By MS/MS	By MS/MS	By MS/MS	By MS/MS	By MS/MS	By MS/MS	9.7	11.3	11.3	11.9	19.7	21.4	2900000000	440790000	477830000	502970000	898840000
tr|Q4D449|Q4D449_TRYCC	tr|Q4D449|Q4D449_TRYCC	7	7	3	>tr|Q4D449|Q4D449_TRYCC Glycyl-tRNA synthetase, putative OS=Trypanosoma cruzi (strain CL Brener) GN=Tc00.1047053511229.110 PE=4 SV=1	1	7	7	3	24	5	6	7	6	5	6	7	6	2	2	3	3	14.8	14.8	7.7	70095	623	623	1	76	0	70753	By MS/MS	By MS/MS	By MS/MS	By MS/MS	By MS/MS	By MS/MS	9.5	11.1	9.5	9.1	14.8	13.3	3404100000	407400000	756460000	584520000	893580000
tr|Q4DKU5|Q4DKU5_TRYCC	tr|Q4DKU5|Q4DKU5_TRYCC	7	7	7	>tr|Q4DKU5|Q4DKU5_TRYCC Uncharacterized protein OS=Trypanosoma cruzi (strain CL Brener) GN=Tc00.1047053509769.80 PE=4 SV=1	1	7	7	7	24	6	5	6	7	6	5	6	7	6	5	6	7	26.6	26.6	26.6	43733	399	399	1	63	0	135.6	By MS/MS	By MS/MS	By MS/MS	By MS/MS	By MS/MS	By MS/MS	23.6	23.3	18	15.5	18.5	26.6	2093300000	306650000	255410000	298610000	820830000
tr|Q4DB82|Q4DB82_TRYCC	tr|Q4DB82|Q4DB82_TRYCC	8	8	8	>tr|Q4DB82|Q4DB82_TRYCC NUP-1 protein, putative (Fragment) OS=Trypanosoma cruzi (strain CL Brener) GN=Tc00.1047053508441.10 PE=4 SV=1	1	8	8	8	24	5	5	6	8	5	5	6	8	5	5	6	8	10	10	10	87592	781	781	1	55	0	15204	By MS/MS	By MS/MS	By MS/MS	By MS/MS	By MS/MS	By MS/MS	5.9	6.3	5	6.4	8.1	10	4011400000	731920000	896330000	403420000	1190300000
tr|Q4E4I1|Q4E4I1_TRYCC	tr|Q4E4I1|Q4E4I1_TRYCC	8	8	2	>tr|Q4E4I1|Q4E4I1_TRYCC Uncharacterized protein OS=Trypanosoma cruzi (strain CL Brener) GN=Tc00.1047053506885.200 PE=4 SV=1	1	8	8	2	24	5	4	8	7	5	4	8	7	1	1	2	1	11.4	11.4	2.9	113.96	1036	1036	1	57	0	55861	By MS/MS	By MS/MS	By MS/MS	By MS/MS	By MS/MS	By MS/MS	6.3	5.2	4.1	5.2	11.4	10	3234700000	632450000	652360000	417170000	926340000
tr|Q4D0Q5|Q4D0Q5_TRYCC;tr|Q4D2A4|Q4D2A4_TRYCC	tr|Q4D0Q5|Q4D0Q5_TRYCC;tr|Q4D2A4|Q4D2A4_TRYCC	8;7	8;7	8;7	>tr|Q4D0Q5|Q4D0Q5_TRYCC Uncharacterized protein OS=Trypanosoma cruzi (strain CL Brener) GN=Tc00.1047053509571.50 PE=4 SV=1;>tr|Q4D2A4|Q4D2A4_TRYCC Uncharacterized protein OS=Trypanosoma cruzi (strain CL Brener) GN=Tc00.1047053511409.50 PE=4 SV=1	2	8	8	8	24	6	7	6	5	6	7	6	5	6	7	6	5	21.5	21.5	21.5	58012	483	483;525	1	65	0	25048	By MS/MS	By MS/MS	By MS/MS	By MS/MS	By MS/MS	By MS/MS	15.3	18.6	13	15.3	15.3	13.7	2186900000	384240000	597210000	207030000	411070000
tr|Q4DU56|Q4DU56_TRYCC	tr|Q4DU56|Q4DU56_TRYCC	9	9	9	>tr|Q4DU56|Q4DU56_TRYCC Pitrilysin-like metalloprotease, putative OS=Trypanosoma cruzi (strain CL Brener) GN=Tc00.1047053511391.200 PE=3 SV=1	1	9	9	9	24	3	6	8	7	3	6	8	7	3	6	8	7	12.5	12.5	12.5	114.24	1024	1024	1	62	0	21969	By MS/MS	By MS/MS	By MS/MS	By MS/MS	By MS/MS	By MS/MS	4.1	7.9	5	6.3	10.9	9.8	3224500000	396580000	844270000	467720000	896300000
tr|Q4DL58|Q4DL58_TRYCC	tr|Q4DL58|Q4DL58_TRYCC	7	7	2	>tr|Q4DL58|Q4DL58_TRYCC Uncharacterized protein OS=Trypanosoma cruzi (strain CL Brener) GN=Tc00.1047053509029.60 PE=4 SV=1	1	7	7	2	24	6	6	6	6	6	6	6	6	2	2	2	2	15.4	15.4	3.5	90633	798	798	1	67	0	130	By MS/MS	By MS/MS	By MS/MS	By MS/MS	By MS/MS	By MS/MS	12.3	12.3	15.4	11	12.3	12.3	2157300000	285820000	471830000	351440000	647800000
tr|Q4DPV8|Q4DPV8_TRYCC	tr|Q4DPV8|Q4DPV8_TRYCC	7	7	7	>tr|Q4DPV8|Q4DPV8_TRYCC Uncharacterized protein OS=Trypanosoma cruzi (strain CL Brener) GN=Tc00.1047053510877.20 PE=4 SV=1	1	7	7	7	24	5	6	6	7	5	6	6	7	5	6	6	7	14.3	14.3	14.3	67514	582	582	1	74	0	21382	By MS/MS	By MS/MS	By MS/MS	By MS/MS	By MS/MS	By MS/MS	11.5	12.5	9.1	11.5	14.3	14.3	1828500000	279340000	296210000	312960000	444130000
tr|Q4D793|Q4D793_TRYCC	tr|Q4D793|Q4D793_TRYCC	7	2	2	>tr|Q4D793|Q4D793_TRYCC Uncharacterized protein OS=Trypanosoma cruzi (strain CL Brener) GN=Tc00.1047053506351.20 PE=4 SV=1	1	7	2	2	24	6	6	6	6	2	2	2	2	2	2	2	2	25.2	12.2	12.2	38472	345	345	1	31	0	13445	By MS/MS	By MS/MS	By MS/MS	By MS/MS	By MS/MS	By MS/MS	22.9	25.2	21.7	25.2	25.2	25.2	848300000	142990000	169180000	116270000	149940000
tr|Q4D7R4|Q4D7R4_TRYCC;tr|Q4D526|Q4D526_TRYCC	tr|Q4D7R4|Q4D7R4_TRYCC;tr|Q4D526|Q4D526_TRYCC	9;6	9;6	9;6	>tr|Q4D7R4|Q4D7R4_TRYCC Glutathione synthetase OS=Trypanosoma cruzi (strain CL Brener) GN=Tc00.1047053508865.10 PE=3 SV=1;>tr|Q4D526|Q4D526_TRYCC Glutathione synthetase OS=Trypanosoma cruzi (strain CL Brener) GN=Tc00.1047053506659.30 PE=3 SV=1	2	9	9	9	24	5	4	7	8	5	4	7	8	5	4	7	8	31.2	31.2	31.2	58624	535	535;535	1	62	0	39968	By MS/MS	By MS/MS	By MS/MS	By MS/MS	By MS/MS	By MS/MS	16.4	12	11.2	11.2	21.7	29.3	1457900000	160850000	184130000	275560000	627420000
tr|Q4DRD8|Q4DRD8_TRYCC	tr|Q4DRD8|Q4DRD8_TRYCC	6	1	1	>tr|Q4DRD8|Q4DRD8_TRYCC Glycosomal malate dehydrogenase, putative OS=Trypanosoma cruzi (strain CL Brener) GN=Tc00.1047053506503.69 PE=3 SV=1	1	6	1	1	24	6	6	6	6	1	1	1	1	1	1	1	1	26.6	8.7	8.7	34068	323	323	1	8	0	40.76	By MS/MS	By MS/MS	By matching	By matching	By MS/MS	By MS/MS	26.6	26.6	11.1	11.1	26.6	26.6	579130000	42230000	47548000	167100000	322250000
tr|Q4DIV2|Q4DIV2_TRYCC	tr|Q4DIV2|Q4DIV2_TRYCC	9	9	2	>tr|Q4DIV2|Q4DIV2_TRYCC Uncharacterized protein OS=Trypanosoma cruzi (strain CL Brener) GN=Tc00.1047053507709.120 PE=4 SV=1	1	9	9	2	24	6	4	7	7	6	4	7	7	1	1	1	2	11.7	11.7	2.8	154.2	1354	1354	1	39	0	17289	By MS/MS	By MS/MS	By matching	By MS/MS	By MS/MS	By MS/MS	8.3	5.5	0.8	2	9.4	8.5	985370000	209310000	164580000	299160000	298260000
tr|Q4D0L3|Q4D0L3_TRYCC	tr|Q4D0L3|Q4D0L3_TRYCC	6	1	1	>tr|Q4D0L3|Q4D0L3_TRYCC Succinyl-CoA:3-ketoacid-coenzyme A transferase OS=Trypanosoma cruzi (strain CL Brener) GN=Tc00.1047053506301.50 PE=3 SV=1	1	6	1	1	24	6	6	6	6	1	1	1	1	1	1	1	1	16.9	2.9	2.9	52738	491	491	1	11	0	20028	By MS/MS	By MS/MS	By MS/MS	By MS/MS	By MS/MS	By MS/MS	16.9	16.9	14.7	14.7	16.9	16.9	396380000	55884000	50241000	91808000	142780000
tr|Q4DLB9|Q4DLB9_TRYCC	tr|Q4DLB9|Q4DLB9_TRYCC	7	4	4	>tr|Q4DLB9|Q4DLB9_TRYCC Retrotransposon hot spot (RHS) protein, putative (Fragment) OS=Trypanosoma cruzi (strain CL Brener) GN=Tc00.1047053506595.149 PE=4 SV=1	1	7	4	4	24	6	5	7	6	3	2	4	4	3	2	4	4	10.5	7.2	7.2	94616	822	822	1	23	0	58123	By matching	By MS/MS	By matching	By matching	By MS/MS	By MS/MS	9.2	6.2	4.3	4.3	10.5	9.2	586950000	52451000	95865000	113680000	282190000
tr|Q4CL52|Q4CL52_TRYCC	tr|Q4CL52|Q4CL52_TRYCC	6	1	1	>tr|Q4CL52|Q4CL52_TRYCC Leucyl-tRNA synthetase, putative (Fragment) OS=Trypanosoma cruzi (strain CL Brener) GN=Tc00.1047053509679.9 PE=4 SV=1	1	6	1	1	24	6	6	6	6	1	1	1	1	1	1	1	1	27.5	7.8	7.8	31003	269	269	1	6	0.00037693	23775	By matching	By matching	By matching	By matching	By MS/MS	By MS/MS	27.5	27.5	19.7	19.7	27.5	27.5	113530000	10271000	14787000	42850000	45627000
tr|Q4CR94|Q4CR94_TRYCC	tr|Q4CR94|Q4CR94_TRYCC	9	5	5	>tr|Q4CR94|Q4CR94_TRYCC Uncharacterized protein (Fragment) OS=Trypanosoma cruzi (strain CL Brener) GN=Tc00.1047053503681.9 PE=4 SV=1	1	9	5	5	24	4	5	7	8	1	2	3	4	1	2	3	4	9.9	5.6	5.6	152.03	1370	1370	1	18	0	13622	By MS/MS	By MS/MS	By MS/MS	By MS/MS	By MS/MS	By MS/MS	4	5.5	3.6	2.1	7.6	9	177770000	0	0	43594000	126170000
tr|Q4DN97|Q4DN97_TRYCC;tr|Q4CSP0|Q4CSP0_TRYCC	tr|Q4DN97|Q4DN97_TRYCC;tr|Q4CSP0|Q4CSP0_TRYCC	8;7	1;1	1;1	>tr|Q4DN97|Q4DN97_TRYCC Casein kinase, putative OS=Trypanosoma cruzi (strain CL Brener) GN=Tc00.1047053508541.220 PE=3 SV=1;>tr|Q4CSP0|Q4CSP0_TRYCC Casein kinase, putative OS=Trypanosoma cruzi (strain CL Brener) GN=Tc00.1047053507541.30 PE=3 SV=1	2	8	1	1	24	4	6	6	8	0	1	0	1	0	1	0	1	28.5	2.6	2.6	35809	312	312;312	1	2	1	-2	By matching	By matching	By matching	By matching	By matching	By MS/MS	14.7	19.9	10.3	7.7	21.8	28.5	0	0	0	0	0
tr|Q4D2I4|Q4D2I4_TRYCC	tr|Q4D2I4|Q4D2I4_TRYCC	7	7	7	>tr|Q4D2I4|Q4D2I4_TRYCC ADP-ribosylation factor 3, putative OS=Trypanosoma cruzi (strain CL Brener) GN=Tc00.1047053504433.10 PE=3 SV=1	1	7	7	7	23	5	6	7	5	5	6	7	5	5	6	7	5	37.6	37.6	37.6	20144	178	178	1	101	0	323.31	By MS/MS	By MS/MS	By MS/MS	By MS/MS	By MS/MS	By MS/MS	24.7	37.6	37.1	37.6	37.6	24.7	14589000000	2427800000	3421400000	2072800000	3155800000
tr|Q4CQW2|Q4CQW2_TRYCC;tr|Q4CQW1|Q4CQW1_TRYCC;tr|Q4CY07|Q4CY07_TRYCC;tr|Q4CMS3|Q4CMS3_TRYCC	tr|Q4CQW2|Q4CQW2_TRYCC;tr|Q4CQW1|Q4CQW1_TRYCC;tr|Q4CY07|Q4CY07_TRYCC	8;6;5;2	8;6;5;2	8;6;5;2	>tr|Q4CQW2|Q4CQW2_TRYCC 60S ribosomal protein L4, putative OS=Trypanosoma cruzi (strain CL Brener) GN=Tc00.1047053504121.30 PE=1 SV=1;>tr|Q4CQW1|Q4CQW1_TRYCC 60S ribosomal protein L14, putative (Fragment) OS=Trypanosoma cruzi (strain CL Brener) GN=Tc00.104	4	8	8	8	23	5	3	7	8	5	3	7	8	5	3	7	8	25.4	25.4	25.4	41313	374	374;199;163;185	1	83	0	64583	By MS/MS	By MS/MS	By MS/MS	By MS/MS	By MS/MS	By MS/MS	13.6	8.8	11	11	21.9	25.4	18901000000	2975800000	3365000000	3786600000	6332900000
tr|Q4CNG6|Q4CNG6_TRYCC;tr|Q4CLA8|Q4CLA8_TRYCC	tr|Q4CNG6|Q4CNG6_TRYCC	8;2	8;2	5;2	>tr|Q4CNG6|Q4CNG6_TRYCC Uncharacterized protein OS=Trypanosoma cruzi (strain CL Brener) GN=Tc00.1047053508067.10 PE=4 SV=1	2	8	8	5	23	5	5	6	7	5	5	6	7	4	4	4	4	10.2	10.2	5.7	119.02	1041	1041;173	1	65	0	56478	By MS/MS	By MS/MS	By MS/MS	By MS/MS	By MS/MS	By MS/MS	6	6.1	6	2.8	7.1	9.1	24240000000	6238600000	8438600000	1029300000	2256600000
tr|Q4CVT7|Q4CVT7_TRYCC	tr|Q4CVT7|Q4CVT7_TRYCC	6	6	5	>tr|Q4CVT7|Q4CVT7_TRYCC Imidazolonepropionase, putative OS=Trypanosoma cruzi (strain CL Brener) GN=Tc00.1047053508741.140 PE=4 SV=1	1	6	6	5	23	5	6	6	6	5	6	6	6	4	5	5	5	18.8	18.8	17.2	46733	430	430	1	93	0	39385	By MS/MS	By MS/MS	By MS/MS	By MS/MS	By MS/MS	By MS/MS	17	18.8	18.8	18.8	18.8	18.8	9055500000	1993500000	1990600000	668900000	2241600000
tr|Q4DPQ8|Q4DPQ8_TRYCC;tr|Q4D5K2|Q4D5K2_TRYCC	tr|Q4DPQ8|Q4DPQ8_TRYCC;tr|Q4D5K2|Q4D5K2_TRYCC	7;7	7;7	7;7	>tr|Q4DPQ8|Q4DPQ8_TRYCC 60S ribosomal protein L2, putative OS=Trypanosoma cruzi (strain CL Brener) GN=Tc00.1047053511181.100 PE=1 SV=1;>tr|Q4D5K2|Q4D5K2_TRYCC 60S ribosomal protein L2, putative OS=Trypanosoma cruzi (strain CL Brener) GN=Tc00.1047053508299.	2	7	7	7	23	5	4	7	7	5	4	7	7	5	4	7	7	38.1	38.1	38.1	28375	260	260;260	1	85	0	113.41	By MS/MS	By MS/MS	By MS/MS	By MS/MS	By MS/MS	By MS/MS	31.2	21.2	12.3	23.8	38.1	38.1	11243000000	881390000	1736300000	2645900000	4977800000
tr|Q4D3P5|Q4D3P5_TRYCC	tr|Q4D3P5|Q4D3P5_TRYCC	7	7	3	>tr|Q4D3P5|Q4D3P5_TRYCC Phosphotransferase OS=Trypanosoma cruzi (strain CL Brener) GN=Tc00.1047053508951.20 PE=3 SV=1	1	7	7	3	23	5	4	7	7	5	4	7	7	2	1	3	3	21	21	8.7	52144	471	471	1	82	0	45029	By MS/MS	By MS/MS	By MS/MS	By MS/MS	By MS/MS	By MS/MS	13.4	11	11.9	13.4	21	21	9098600000	1434400000	2578900000	1196200000	2570800000
tr|Q4CZG5|Q4CZG5_TRYCC	tr|Q4CZG5|Q4CZG5_TRYCC	6	6	6	>tr|Q4CZG5|Q4CZG5_TRYCC Ribonucleoprotein p18, mitochondrial, putative OS=Trypanosoma cruzi (strain CL Brener) GN=Tc00.1047053510821.60 PE=4 SV=1	1	6	6	6	23	6	6	5	6	6	6	5	6	6	6	5	6	24.2	24.2	24.2	27075	236	236	1	84	0	67465	By MS/MS	By MS/MS	By MS/MS	By MS/MS	By MS/MS	By MS/MS	24.2	24.2	18.2	15.3	21.2	24.2	6789600000	903410000	1356500000	1125300000	2452500000
tr|Q4E3A4|Q4E3A4_TRYCC;tr|Q4E3A3|Q4E3A3_TRYCC	tr|Q4E3A4|Q4E3A4_TRYCC;tr|Q4E3A3|Q4E3A3_TRYCC	7;7	7;7	7;7	>tr|Q4E3A4|Q4E3A4_TRYCC 60S acidic ribosomal protein P0 OS=Trypanosoma cruzi (strain CL Brener) GN=Tc00.1047053508355.250 PE=3 SV=1;>tr|Q4E3A3|Q4E3A3_TRYCC 60S acidic ribosomal protein P0 OS=Trypanosoma cruzi (strain CL Brener) GN=Tc00.1047053508355.260 PE	2	7	7	7	23	4	5	7	7	4	5	7	7	4	5	7	7	22	22	22	34958	323	323;323	1	54	0	22845	By MS/MS	By MS/MS	By matching	By MS/MS	By MS/MS	By MS/MS	9.3	12.1	5.6	9.3	22	22	8437200000	913480000	1456300000	1847800000	3404800000
tr|Q4D1R9|Q4D1R9_TRYCC	tr|Q4D1R9|Q4D1R9_TRYCC	7	7	1	>tr|Q4D1R9|Q4D1R9_TRYCC 2-oxoglutarate dehydrogenase, E2 component, dihydrolipoamide succinyltransferase, putative OS=Trypanosoma cruzi (strain CL Brener) GN=Tc00.1047053506025.60 PE=4 SV=1	1	7	7	1	23	5	5	7	6	5	5	7	6	1	1	1	1	17.6	17.6	2.2	44031	404	404	1	68	0	21715	By MS/MS	By MS/MS	By MS/MS	By MS/MS	By MS/MS	By MS/MS	11.4	11.4	11.4	11.4	17.6	17.6	5280800000	909930000	1244800000	701170000	1163000000
tr|Q4E4E4|Q4E4E4_TRYCC	tr|Q4E4E4|Q4E4E4_TRYCC	9	8	8	>tr|Q4E4E4|Q4E4E4_TRYCC Tyrosine aminotransferase, putative OS=Trypanosoma cruzi (strain CL Brener) GN=Tc00.1047053510187.70 PE=4 SV=1	1	9	8	8	23	3	4	8	8	3	4	7	7	3	4	7	7	32.3	28.2	28.2	45662	412	412	1	62	0	22767	By MS/MS	By MS/MS	By MS/MS	By MS/MS	By MS/MS	By MS/MS	10.4	12.4	10.4	14.6	30.3	23.3	5721700000	787880000	1234200000	1061300000	1480200000
tr|Q4DTY0|Q4DTY0_TRYCC;tr|Q4CXC3|Q4CXC3_TRYCC	tr|Q4DTY0|Q4DTY0_TRYCC;tr|Q4CXC3|Q4CXC3_TRYCC	6;6	6;6	6;6	>tr|Q4DTY0|Q4DTY0_TRYCC Cytochrome c oxidase VII, putative OS=Trypanosoma cruzi (strain CL Brener) GN=Tc00.1047053509233.150 PE=4 SV=1;>tr|Q4CXC3|Q4CXC3_TRYCC Cytochrome c oxidase VII, putative OS=Trypanosoma cruzi (strain CL Brener) GN=Tc00.1047053503769.	2	6	6	6	23	5	6	6	6	5	6	6	6	5	6	6	6	41.2	41.2	41.2	19065	165	165;165	1	74	0	28041	By MS/MS	By MS/MS	By MS/MS	By MS/MS	By MS/MS	By MS/MS	37.6	41.2	28.5	32.1	41.2	41.2	3690700000	362940000	645090000	666680000	1361300000
tr|Q4CWQ8|Q4CWQ8_TRYCC;tr|Q4D3I2|Q4D3I2_TRYCC	tr|Q4CWQ8|Q4CWQ8_TRYCC	7;2	7;2	4;1	>tr|Q4CWQ8|Q4CWQ8_TRYCC Uncharacterized protein OS=Trypanosoma cruzi (strain CL Brener) GN=Tc00.1047053503837.10 PE=4 SV=1	2	7	7	4	23	5	6	6	6	5	6	6	6	3	4	4	4	13.2	13.2	7.5	66459	604	604;605	1	69	0	13355	By MS/MS	By MS/MS	By MS/MS	By MS/MS	By MS/MS	By MS/MS	9.6	11.3	9.8	13.2	11.3	11.3	4425900000	669680000	1126400000	535210000	1258200000
tr|Q4DQB5|Q4DQB5_TRYCC	tr|Q4DQB5|Q4DQB5_TRYCC	8	8	2	>tr|Q4DQB5|Q4DQB5_TRYCC CCR4 associated factor, putative OS=Trypanosoma cruzi (strain CL Brener) GN=Tc00.1047053511827.60 PE=4 SV=1	1	8	8	2	23	6	4	7	6	6	4	7	6	1	1	2	1	30.4	30.4	9.2	46389	415	415	1	81	0	69.77	By MS/MS	By MS/MS	By MS/MS	By MS/MS	By MS/MS	By MS/MS	24.3	17.8	16.6	12	26.3	23.4	4466500000	515100000	1016400000	1062500000	1332400000
tr|Q4DKU9|Q4DKU9_TRYCC	tr|Q4DKU9|Q4DKU9_TRYCC	9	9	9	>tr|Q4DKU9|Q4DKU9_TRYCC Uncharacterized protein OS=Trypanosoma cruzi (strain CL Brener) GN=Tc00.1047053509769.60 PE=4 SV=1	1	9	9	9	23	4	5	8	6	4	5	8	6	4	5	8	6	30.5	30.5	30.5	32231	282	282	1	70	0	54571	By MS/MS	By MS/MS	By MS/MS	By MS/MS	By MS/MS	By MS/MS	13.5	18.4	14.5	17	30.5	30.5	4464000000	654150000	905020000	888840000	1287200000
tr|Q4CV48|Q4CV48_TRYCC	tr|Q4CV48|Q4CV48_TRYCC	6	1	1	>tr|Q4CV48|Q4CV48_TRYCC Cytochrome c, putative OS=Trypanosoma cruzi (strain CL Brener) GN=Tc00.1047053508959.4 PE=3 SV=1	1	6	1	1	23	6	6	6	5	1	1	1	1	1	1	1	1	50.9	9.6	9.6	12239	114	114	1	11	0.0034554	18394	By MS/MS	By MS/MS	By matching	By MS/MS	By matching	By MS/MS	50.9	50.9	50.9	42.1	50.9	42.1	1800100000	336750000	325310000	171840000	591680000
tr|Q4CTD5|Q4CTD5_TRYCC;REV__tr|Q4DAP5|Q4DAP5_TRYCC	tr|Q4CTD5|Q4CTD5_TRYCC	7;1	7;1	6;0	>tr|Q4CTD5|Q4CTD5_TRYCC Protein tyrosine phosphatase, putative OS=Trypanosoma cruzi (strain CL Brener) GN=Tc00.1047053511635.40 PE=4 SV=1	2	7	7	6	23	6	6	6	5	6	6	6	5	5	5	5	4	33.3	33.3	30.8	26743	234	234;455	1	73	0	10.55	By MS/MS	By MS/MS	By MS/MS	By MS/MS	By MS/MS	By MS/MS	27.4	27.8	30.8	33.3	28.6	24.8	2960700000	385740000	884230000	307680000	756170000
tr|Q4CTH2|Q4CTH2_TRYCC;tr|Q4E3T4|Q4E3T4_TRYCC	tr|Q4CTH2|Q4CTH2_TRYCC;tr|Q4E3T4|Q4E3T4_TRYCC	8;7	8;7	8;7	>tr|Q4CTH2|Q4CTH2_TRYCC Centrin, putative OS=Trypanosoma cruzi (strain CL Brener) GN=Tc00.1047053503727.10 PE=4 SV=1;>tr|Q4E3T4|Q4E3T4_TRYCC Centrin, putative OS=Trypanosoma cruzi (strain CL Brener) GN=Tc00.1047053506401.90 PE=4 SV=1	2	8	8	8	23	5	6	6	6	5	6	6	6	5	6	6	6	63	63	63	21.16	189	189;189	1	65	0	46357	By MS/MS	By MS/MS	By MS/MS	By MS/MS	By MS/MS	By MS/MS	41.3	46	41.3	48.1	57.7	46	2141300000	370830000	429470000	278010000	587830000
tr|Q4CL46|Q4CL46_TRYCC	tr|Q4CL46|Q4CL46_TRYCC	8	8	3	>tr|Q4CL46|Q4CL46_TRYCC Uncharacterized protein (Fragment) OS=Trypanosoma cruzi (strain CL Brener) GN=Tc00.1047053453917.9 PE=4 SV=1	1	8	8	3	23	5	5	7	6	5	5	7	6	2	1	2	1	39.1	39.1	16.3	38733	361	361	1	70	0	31483	By MS/MS	By MS/MS	By MS/MS	By MS/MS	By MS/MS	By MS/MS	21.6	22.7	19.1	19.1	36.6	28.8	3692500000	561260000	721650000	502670000	1134900000
tr|Q4D905|Q4D905_TRYCC	tr|Q4D905|Q4D905_TRYCC	7	7	4	>tr|Q4D905|Q4D905_TRYCC Uncharacterized protein OS=Trypanosoma cruzi (strain CL Brener) GN=Tc00.1047053505171.60 PE=4 SV=1	1	7	7	4	23	6	5	7	5	6	5	7	5	4	3	4	3	26.4	26.4	17	43757	394	394	1	72	0	122.45	By MS/MS	By MS/MS	By MS/MS	By MS/MS	By MS/MS	By MS/MS	22.6	12.9	9.1	9.1	26.4	22.6	2891700000	549240000	542370000	485620000	623570000
tr|Q4DDY7|Q4DDY7_TRYCC	tr|Q4DDY7|Q4DDY7_TRYCC	7	7	3	>tr|Q4DDY7|Q4DDY7_TRYCC ADP/ATP translocase, putative OS=Trypanosoma cruzi (strain CL Brener) GN=Tc00.1047053511249.20 PE=3 SV=1	1	7	7	3	23	6	5	6	6	6	5	6	6	3	2	3	3	32.9	32.9	15.7	38107	343	343	1	56	0	19829	By MS/MS	By MS/MS	By MS/MS	By MS/MS	By MS/MS	By MS/MS	24.8	20.7	24.8	30.6	30.6	24.8	2123800000	452670000	370130000	247720000	511810000
tr|Q4DRV5|Q4DRV5_TRYCC;tr|Q4CYZ0|Q4CYZ0_TRYCC	tr|Q4DRV5|Q4DRV5_TRYCC;tr|Q4CYZ0|Q4CYZ0_TRYCC	7;7	7;7	7;7	>tr|Q4DRV5|Q4DRV5_TRYCC Uncharacterized protein OS=Trypanosoma cruzi (strain CL Brener) GN=Tc00.1047053507669.160 PE=4 SV=1;>tr|Q4CYZ0|Q4CYZ0_TRYCC Uncharacterized protein OS=Trypanosoma cruzi (strain CL Brener) GN=Tc00.1047053509877.40 PE=4 SV=1	2	7	7	7	23	5	4	7	7	5	4	7	7	5	4	7	7	18.8	18.8	18.8	43696	394	394;394	1	66	0	24507	By MS/MS	By MS/MS	By MS/MS	By MS/MS	By MS/MS	By MS/MS	15.7	13.5	13.2	9.1	18.8	18.8	2657900000	431780000	542750000	511840000	808210000
tr|Q4D7J7|Q4D7J7_TRYCC;tr|Q4D0S6|Q4D0S6_TRYCC	tr|Q4D7J7|Q4D7J7_TRYCC;tr|Q4D0S6|Q4D0S6_TRYCC	6;6	6;6	6;6	>tr|Q4D7J7|Q4D7J7_TRYCC Cytochrome P450, putative OS=Trypanosoma cruzi (strain CL Brener) GN=Tc00.1047053509719.40 PE=4 SV=1;>tr|Q4D0S6|Q4D0S6_TRYCC Cytochrome P450, putative OS=Trypanosoma cruzi (strain CL Brener) GN=Tc00.1047053509231.10 PE=4 SV=1	2	6	6	6	23	6	6	5	6	6	6	5	6	6	6	5	6	14.1	14.1	14.1	65591	573	573;573	1	65	0	75718	By MS/MS	By MS/MS	By MS/MS	By MS/MS	By MS/MS	By MS/MS	14.1	14.1	10.3	8.2	12.2	14.1	2239500000	510770000	809000000	257590000	567270000
tr|Q4DIM2|Q4DIM2_TRYCC	tr|Q4DIM2|Q4DIM2_TRYCC	9	9	9	>tr|Q4DIM2|Q4DIM2_TRYCC Uncharacterized protein OS=Trypanosoma cruzi (strain CL Brener) GN=Tc00.1047053509777.130 PE=4 SV=1	1	9	9	9	23	4	5	8	6	4	5	8	6	4	5	8	6	25.6	25.6	25.6	66889	597	597	1	65	0	52131	By MS/MS	By MS/MS	By MS/MS	By MS/MS	By MS/MS	By MS/MS	10.9	13.2	10.9	18.8	22.8	17.4	1821500000	307480000	418400000	292830000	363200000
tr|Q4CVE4|Q4CVE4_TRYCC	tr|Q4CVE4|Q4CVE4_TRYCC	8	8	2	>tr|Q4CVE4|Q4CVE4_TRYCC Uncharacterized protein OS=Trypanosoma cruzi (strain CL Brener) GN=Tc00.1047053507033.10 PE=4 SV=1	1	8	8	2	23	6	5	7	5	6	5	7	5	1	0	1	1	18.5	18.5	5.4	71008	631	631	1	56	0	56251	By MS/MS	By MS/MS	By MS/MS	By MS/MS	By MS/MS	By MS/MS	12.4	10.5	10.3	10.5	16.6	11.9	1973000000	294020000	541430000	403690000	441380000
tr|Q4DVP6|Q4DVP6_TRYCC;tr|Q4D7B1|Q4D7B1_TRYCC	tr|Q4DVP6|Q4DVP6_TRYCC;tr|Q4D7B1|Q4D7B1_TRYCC	8;8	8;8	8;8	>tr|Q4DVP6|Q4DVP6_TRYCC Chaperone DnaJ protein, putative OS=Trypanosoma cruzi (strain CL Brener) GN=Tc00.1047053510659.210 PE=3 SV=1;>tr|Q4D7B1|Q4D7B1_TRYCC Chaperone DnaJ protein, putative OS=Trypanosoma cruzi (strain CL Brener) GN=Tc00.1047053510743.100	2	8	8	8	23	4	5	8	6	4	5	8	6	4	5	8	6	21.2	21.2	21.2	49.04	448	448;448	1	62	0	40466	By MS/MS	By MS/MS	By MS/MS	By MS/MS	By MS/MS	By MS/MS	9.2	16.1	13.4	12.1	21.2	16.7	1918300000	243580000	381580000	396280000	529210000
tr|Q4DZE3|Q4DZE3_TRYCC	tr|Q4DZE3|Q4DZE3_TRYCC	8	8	5	>tr|Q4DZE3|Q4DZE3_TRYCC Uncharacterized protein OS=Trypanosoma cruzi (strain CL Brener) GN=Tc00.1047053506825.200 PE=4 SV=1	1	8	8	5	23	4	4	8	7	4	4	8	7	2	2	5	4	20.1	20.1	15.5	65812	581	581	1	61	0	78724	By MS/MS	By matching	By matching	By MS/MS	By MS/MS	By MS/MS	9.3	6.5	4.5	4.5	20.1	15.8	2087800000	181320000	264300000	584200000	963400000
tr|Q4DKP5|Q4DKP5_TRYCC	tr|Q4DKP5|Q4DKP5_TRYCC	7	7	7	>tr|Q4DKP5|Q4DKP5_TRYCC Dynein heavy chain, putative (Fragment) OS=Trypanosoma cruzi (strain CL Brener) GN=Tc00.1047053511867.209 PE=4 SV=1	1	7	7	7	23	4	5	7	7	4	5	7	7	4	5	7	7	20.3	20.3	20.3	68184	590	590	1	62	0	21915	By MS/MS	By MS/MS	By MS/MS	By MS/MS	By MS/MS	By MS/MS	9.2	11.7	9.5	6.9	20.3	20.3	1587500000	132530000	388440000	327050000	455550000
tr|Q4CY89|Q4CY89_TRYCC;tr|Q4CX84|Q4CX84_TRYCC	tr|Q4CY89|Q4CY89_TRYCC;tr|Q4CX84|Q4CX84_TRYCC	8;6	8;6	8;6	>tr|Q4CY89|Q4CY89_TRYCC Uncharacterized protein OS=Trypanosoma cruzi (strain CL Brener) GN=Tc00.1047053508649.20 PE=4 SV=1;>tr|Q4CX84|Q4CX84_TRYCC Uncharacterized protein OS=Trypanosoma cruzi (strain CL Brener) GN=Tc00.1047053509499.38 PE=4 SV=1	2	8	8	8	23	7	3	7	6	7	3	7	6	7	3	7	6	20.2	20.2	20.2	48785	435	435;460	1	49	0	10204	By MS/MS	By MS/MS	By MS/MS	By matching	By MS/MS	By MS/MS	16.6	8.3	13.6	6.9	17	14.9	859330000	135110000	170800000	207340000	241360000
tr|Q4E0M2|Q4E0M2_TRYCC	tr|Q4E0M2|Q4E0M2_TRYCC	6	6	6	>tr|Q4E0M2|Q4E0M2_TRYCC Uncharacterized protein OS=Trypanosoma cruzi (strain CL Brener) GN=Tc00.1047053509429.80 PE=4 SV=1	1	6	6	6	23	5	6	6	6	5	6	6	6	5	6	6	6	9.3	9.3	9.3	101.49	902	902	1	57	0	11983	By MS/MS	By MS/MS	By MS/MS	By MS/MS	By MS/MS	By MS/MS	7.5	9.3	9.3	9.3	9.3	9.3	1189400000	234840000	301460000	182900000	243980000
tr|Q4CTS2|Q4CTS2_TRYCC;tr|Q4CT27|Q4CT27_TRYCC;tr|Q4E1F3|Q4E1F3_TRYCC;tr|Q4DAR6|Q4DAR6_TRYCC	tr|Q4CTS2|Q4CTS2_TRYCC;tr|Q4CT27|Q4CT27_TRYCC	8;6;3;3	8;6;3;3	2;1;1;0	>tr|Q4CTS2|Q4CTS2_TRYCC Dispersed gene family protein 1 (DGF-1), putative (Fragment) OS=Trypanosoma cruzi (strain CL Brener) GN=Tc00.1047053506549.9 PE=4 SV=1;>tr|Q4CT27|Q4CT27_TRYCC Dispersed gene family protein 1 (DGF-1), putative (Fragment) OS=Trypanoso	4	8	8	2	23	4	5	8	6	4	5	8	6	1	1	2	1	4.7	4.7	1.5	260.72	2511	2511;2160;3459;3473	1	55	0	17344	By MS/MS	By MS/MS	By MS/MS	By MS/MS	By MS/MS	By MS/MS	2.7	3.1	3.1	0.7	4.7	3.7	1829300000	295790000	395260000	378650000	500240000
tr|Q4DRT5|Q4DRT5_TRYCC;tr|Q4DEI4|Q4DEI4_TRYCC	tr|Q4DRT5|Q4DRT5_TRYCC;tr|Q4DEI4|Q4DEI4_TRYCC	7;7	7;7	7;7	>tr|Q4DRT5|Q4DRT5_TRYCC ABC transporter, putative OS=Trypanosoma cruzi (strain CL Brener) GN=Tc00.1047053510943.80 PE=4 SV=1;>tr|Q4DEI4|Q4DEI4_TRYCC ABC transporter, putative OS=Trypanosoma cruzi (strain CL Brener) GN=Tc00.1047053504867.20 PE=4 SV=1	2	7	7	7	23	5	5	7	6	5	5	7	6	5	5	7	6	12	12	12	82906	723	723;723	1	54	0	30971	By MS/MS	By MS/MS	By MS/MS	By MS/MS	By MS/MS	By MS/MS	7.6	7.6	2.6	5.9	12	10.4	1463500000	154950000	175000000	443880000	613730000
tr|Q4DG00|Q4DG00_TRYCC	tr|Q4DG00|Q4DG00_TRYCC	7	4	2	>tr|Q4DG00|Q4DG00_TRYCC Folate/pteridine transporter, putative OS=Trypanosoma cruzi (strain CL Brener) GN=Tc00.1047053508027.40 PE=4 SV=1	1	7	4	2	23	5	6	6	6	3	3	3	3	1	2	1	2	12.4	7.1	2.4	68433	621	621	1	35	0	79742	By MS/MS	By MS/MS	By MS/MS	By MS/MS	By MS/MS	By MS/MS	10.8	9.7	12.4	12.4	12.4	9.7	611800000	37916000	74313000	74022000	181730000
tr|Q4DMI6|Q4DMI6_TRYCC	tr|Q4DMI6|Q4DMI6_TRYCC	9	9	9	>tr|Q4DMI6|Q4DMI6_TRYCC Dynein heavy chain, putative (Fragment) OS=Trypanosoma cruzi (strain CL Brener) GN=Tc00.1047053508815.179 PE=4 SV=1	1	9	9	9	23	6	6	7	4	6	6	7	4	6	6	7	4	5.9	5.9	5.9	282.36	2459	2459	1	68	0	62.28	By MS/MS	By MS/MS	By MS/MS	By MS/MS	By MS/MS	By MS/MS	3.8	3.9	3.8	3.8	4.4	2.8	1306200000	171980000	306210000	204720000	242720000
tr|Q4DBG8|Q4DBG8_TRYCC	tr|Q4DBG8|Q4DBG8_TRYCC	9	9	2	>tr|Q4DBG8|Q4DBG8_TRYCC Uncharacterized protein OS=Trypanosoma cruzi (strain CL Brener) GN=Tc00.1047053506327.30 PE=4 SV=1	1	9	9	2	23	5	3	6	9	5	3	6	9	1	0	1	2	13.2	13.2	3	128.27	1150	1150	1	50	0	32786	By MS/MS	By MS/MS	By MS/MS	By MS/MS	By MS/MS	By MS/MS	7.3	3.2	3.9	6.3	10	13.2	937690000	119050000	85788000	242840000	464430000
tr|Q4DWW5|Q4DWW5_TRYCC	tr|Q4DWW5|Q4DWW5_TRYCC	7	1	1	>tr|Q4DWW5|Q4DWW5_TRYCC Uncharacterized protein OS=Trypanosoma cruzi (strain CL Brener) GN=Tc00.1047053510729.220 PE=4 SV=1	1	7	1	1	23	5	4	7	7	1	1	1	1	1	1	1	1	10.1	1.5	1.5	113.4	1034	1034	1	12	0	39518	By MS/MS	By MS/MS	By MS/MS	By MS/MS	By MS/MS	By MS/MS	6.3	5.2	4.1	5.2	10.1	10.1	329520000	55702000	56315000	48369000	85523000
tr|Q4D531|Q4D531_TRYCC	tr|Q4D531|Q4D531_TRYCC	8	1	1	>tr|Q4D531|Q4D531_TRYCC 60S ribosomal protein L7a, putative OS=Trypanosoma cruzi (strain CL Brener) GN=Tc00.1047053510835.40 PE=4 SV=1	1	8	1	1	23	4	4	8	7	1	0	1	1	1	0	1	1	22.2	2.5	2.5	34549	315	315	1	5	1	-2	By matching	By matching	By matching	By matching	By MS/MS	By matching	15.2	14.9	9.8	15.2	22.2	21.9	144210000	13482000	0	53023000	66932000
tr|Q4DR79|Q4DR79_TRYCC	tr|Q4DR79|Q4DR79_TRYCC	9	2	2	>tr|Q4DR79|Q4DR79_TRYCC Uncharacterized protein OS=Trypanosoma cruzi (strain CL Brener) GN=Tc00.1047053506577.150 PE=4 SV=1	1	9	2	2	23	5	4	8	6	0	1	2	1	0	1	2	1	12.7	3.8	3.8	154.06	1354	1354	1	6	0	89295	By matching	By MS/MS	By matching	By matching	By MS/MS	By MS/MS	6.7	6.1	0.8	2	11.5	8	122100000	0	51483000	20902000	49715000
tr|Q4E0N9|Q4E0N9_TRYCC	tr|Q4E0N9|Q4E0N9_TRYCC	8	2	2	>tr|Q4E0N9|Q4E0N9_TRYCC Eukaryotic release factor 3, putative OS=Trypanosoma cruzi (strain CL Brener) GN=Tc00.1047053506297.300 PE=4 SV=1	1	8	2	2	23	5	5	6	7	1	1	2	2	1	1	2	2	14	5.7	5.7	74958	680	680	1	10	0	21271	By MS/MS	By MS/MS	By matching	By MS/MS	By MS/MS	By MS/MS	8.2	8.2	2.8	9.1	12.9	12.9	152550000	6830800	9325700	31402000	96461000
tr|Q4DTA6|Q4DTA6_TRYCC	tr|Q4DTA6|Q4DTA6_TRYCC	8	1	1	>tr|Q4DTA6|Q4DTA6_TRYCC Prostaglandin F2alpha synthase (Fragment) OS=Trypanosoma cruzi (strain CL Brener) GN=Tc00.1047053506147.9 PE=4 SV=1	1	8	1	1	23	4	5	7	7	0	0	0	1	0	0	0	1	71.3	14.7	14.7	14657	129	129	1	1	1	-2	By matching	By matching	By matching	By matching	By matching	By MS/MS	38.8	49.6	38.8	38.8	56.6	71.3	29750000	0	0	0	29750000
tr|Q4DEL1|Q4DEL1_TRYCC	tr|Q4DEL1|Q4DEL1_TRYCC	6	6	2	>tr|Q4DEL1|Q4DEL1_TRYCC Histone H4 OS=Trypanosoma cruzi (strain CL Brener) GN=Tc00.1047053507941.150 PE=3 SV=1	1	6	6	2	22	5	5	6	6	5	5	6	6	2	2	2	2	42	42	11	11.17	100	100	1	111	0	48827	By MS/MS	By MS/MS	By MS/MS	By MS/MS	By MS/MS	By MS/MS	41	41	33	33	42	42	112090000000	18434000000	23387000000	18079000000	28286000000
tr|Q4D1B8|Q4D1B8_TRYCC	tr|Q4D1B8|Q4D1B8_TRYCC	6	6	6	>tr|Q4D1B8|Q4D1B8_TRYCC Tryparedoxin, putative OS=Trypanosoma cruzi (strain CL Brener) GN=Tc00.1047053509997.30 PE=4 SV=1	1	6	6	6	22	5	5	6	6	5	5	6	6	5	5	6	6	52.1	52.1	52.1	16037	144	144	1	73	0	39675	By MS/MS	By MS/MS	By MS/MS	By MS/MS	By MS/MS	By MS/MS	34.7	34.7	27.1	34.7	52.1	52.1	18775000000	3425500000	2429000000	4019000000	5858100000
tr|Q4DJ35|Q4DJ35_TRYCC	tr|Q4DJ35|Q4DJ35_TRYCC	7	7	4	>tr|Q4DJ35|Q4DJ35_TRYCC Uncharacterized protein OS=Trypanosoma cruzi (strain CL Brener) GN=Tc00.1047053511239.110 PE=4 SV=1	1	7	7	4	22	4	4	7	7	4	4	7	7	1	1	4	4	36	36	18	22227	200	200	1	88	0	107.04	By MS/MS	By MS/MS	By MS/MS	By MS/MS	By MS/MS	By MS/MS	23.5	23.5	19.5	23.5	36	36	11374000000	1875600000	2565900000	2120700000	3069500000
tr|Q4DW38|Q4DW38_TRYCC	tr|Q4DW38|Q4DW38_TRYCC	7	7	7	>tr|Q4DW38|Q4DW38_TRYCC 40S ribosomal protein S24 OS=Trypanosoma cruzi (strain CL Brener) GN=Tc00.1047053507681.150 PE=3 SV=1	1	7	7	7	22	4	4	7	7	4	4	7	7	4	4	7	7	44.5	44.5	44.5	15667	137	137	1	57	0	61376	By MS/MS	By MS/MS	By MS/MS	By MS/MS	By MS/MS	By MS/MS	29.9	29.9	19	19	44.5	44.5	7562100000	885840000	1132300000	1680100000	2953300000
tr|Q4DEJ5|Q4DEJ5_TRYCC;tr|Q4DJ87|Q4DJ87_TRYCC	tr|Q4DEJ5|Q4DEJ5_TRYCC	7;2	5;2	3;2	>tr|Q4DEJ5|Q4DEJ5_TRYCC Glutathione peroxidase OS=Trypanosoma cruzi (strain CL Brener) GN=Tc00.1047053503899.119 PE=3 SV=1	2	7	5	3	22	4	4	7	7	3	3	5	5	3	3	3	3	52	40.7	19.2	19727	177	177;114	1	77	0	43468	By MS/MS	By MS/MS	By MS/MS	By MS/MS	By MS/MS	By MS/MS	23.7	23.7	23.7	23.7	52	52	10696000000	1601700000	2221800000	1758500000	3315900000
tr|Q4CTR5|Q4CTR5_TRYCC;tr|Q4DQ35|Q4DQ35_TRYCC	tr|Q4CTR5|Q4CTR5_TRYCC;tr|Q4DQ35|Q4DQ35_TRYCC	6;6	6;6	6;6	>tr|Q4CTR5|Q4CTR5_TRYCC 40S ribosomal protein L14, putative OS=Trypanosoma cruzi (strain CL Brener) GN=Tc00.1047053506861.30 PE=4 SV=1;>tr|Q4DQ35|Q4DQ35_TRYCC 40S ribosomal protein L14, putative OS=Trypanosoma cruzi (strain CL Brener) GN=Tc00.1047053511825	2	6	6	6	22	5	5	6	6	5	5	6	6	5	5	6	6	22.2	22.2	22.2	20.73	180	180;288	1	67	0	54149	By MS/MS	By MS/MS	By MS/MS	By MS/MS	By MS/MS	By MS/MS	17.2	17.2	17.2	17.2	22.2	22.2	5662800000	686330000	957990000	1368100000	1821700000
tr|Q4DXR0|Q4DXR0_TRYCC;tr|Q4DQZ1|Q4DQZ1_TRYCC	tr|Q4DXR0|Q4DXR0_TRYCC;tr|Q4DQZ1|Q4DQZ1_TRYCC	6;5	6;5	6;5	>tr|Q4DXR0|Q4DXR0_TRYCC Uncharacterized protein OS=Trypanosoma cruzi (strain CL Brener) GN=Tc00.1047053510421.220 PE=4 SV=1;>tr|Q4DQZ1|Q4DQZ1_TRYCC Uncharacterized protein OS=Trypanosoma cruzi (strain CL Brener) GN=Tc00.1047053510089.210 PE=4 SV=1	2	6	6	6	22	5	5	6	6	5	5	6	6	5	5	6	6	41	41	41	17128	144	144;144	1	73	0	13909	By MS/MS	By MS/MS	By MS/MS	By MS/MS	By MS/MS	By MS/MS	34.7	34.7	34.7	41	41	41	5030600000	891970000	781330000	708410000	932910000
tr|Q4E4R1|Q4E4R1_TRYCC;tr|Q4E4R0|Q4E4R0_TRYCC	tr|Q4E4R1|Q4E4R1_TRYCC;tr|Q4E4R0|Q4E4R0_TRYCC	6;5	6;5	6;5	>tr|Q4E4R1|Q4E4R1_TRYCC 60S ribosomal protein L23, putative OS=Trypanosoma cruzi (strain CL Brener) GN=Tc00.1047053508461.480 PE=3 SV=1;>tr|Q4E4R0|Q4E4R0_TRYCC 60S ribosomal protein L23, putative OS=Trypanosoma cruzi (strain CL Brener) GN=Tc00.104705350846	2	6	6	6	22	5	5	6	6	5	5	6	6	5	5	6	6	55.4	55.4	55.4	14.93	139	139;139	1	152	0	33128	By MS/MS	By MS/MS	By MS/MS	By MS/MS	By MS/MS	By MS/MS	44.6	44.6	18.7	23	55.4	55.4	4544000000	353900000	780060000	1217400000	1723900000
tr|Q4DQE1|Q4DQE1_TRYCC;tr|Q4D0R4|Q4D0R4_TRYCC	tr|Q4DQE1|Q4DQE1_TRYCC;tr|Q4D0R4|Q4D0R4_TRYCC	7;7	7;7	7;7	>tr|Q4DQE1|Q4DQE1_TRYCC Mitochondrial RNA binding protein 1, putative OS=Trypanosoma cruzi (strain CL Brener) GN=Tc00.1047053506629.30 PE=4 SV=1;>tr|Q4D0R4|Q4D0R4_TRYCC Mitochondrial RNA binding protein 1, putative OS=Trypanosoma cruzi (strain CL Brener) G	2	7	7	7	22	5	6	6	5	5	6	6	5	5	6	6	5	37.7	37.7	37.7	23117	207	207;207	1	79	0	14.95	By MS/MS	By MS/MS	By MS/MS	By MS/MS	By MS/MS	By MS/MS	20.8	27.5	20.8	27.5	32.9	22.7	5509300000	1056600000	1242300000	872690000	757220000
tr|Q4CQS1|Q4CQS1_TRYCC;tr|Q4CQA8|Q4CQA8_TRYCC	tr|Q4CQS1|Q4CQS1_TRYCC	6;1	6;1	6;1	>tr|Q4CQS1|Q4CQS1_TRYCC 6-phosphogluconolactonase, putative OS=Trypanosoma cruzi (strain CL Brener) GN=Tc00.1047053503713.30 PE=4 SV=1	2	6	6	6	22	5	6	5	6	5	6	5	6	5	6	5	6	29.7	29.7	29.7	28748	263	263;263	1	81	0	55714	By MS/MS	By MS/MS	By MS/MS	By MS/MS	By MS/MS	By MS/MS	24	29.7	29.7	29.7	29.3	29.7	5211800000	720050000	1100400000	720830000	1517300000
tr|Q4DTF4|Q4DTF4_TRYCC;tr|Q4DHH8|Q4DHH8_TRYCC	tr|Q4DTF4|Q4DTF4_TRYCC;tr|Q4DHH8|Q4DHH8_TRYCC	6;3	6;3	6;3	>tr|Q4DTF4|Q4DTF4_TRYCC Quinone oxidoreductase, putative OS=Trypanosoma cruzi (strain CL Brener) GN=Tc00.1047053510311.90 PE=4 SV=1;>tr|Q4DHH8|Q4DHH8_TRYCC Quinone oxidoreductase, putative OS=Trypanosoma cruzi (strain CL Brener) GN=Tc00.1047053510265.10 PE	2	6	6	6	22	5	5	6	6	5	5	6	6	5	5	6	6	29	29	29	35979	334	334;334	1	88	0	27406	By MS/MS	By MS/MS	By MS/MS	By MS/MS	By MS/MS	By MS/MS	22.5	22.5	22.5	22.5	29	29	5210700000	956990000	1247600000	736230000	1379200000
tr|Q4DE30|Q4DE30_TRYCC;tr|Q4CXT3|Q4CXT3_TRYCC	tr|Q4DE30|Q4DE30_TRYCC;tr|Q4CXT3|Q4CXT3_TRYCC	7;6	7;6	7;6	>tr|Q4DE30|Q4DE30_TRYCC RNA-binding protein, putative OS=Trypanosoma cruzi (strain CL Brener) GN=Tc00.1047053506649.80 PE=4 SV=1;>tr|Q4CXT3|Q4CXT3_TRYCC RNA-binding protein, putative (Fragment) OS=Trypanosoma cruzi (strain CL Brener) GN=Tc00.1047053508349.	2	7	7	7	22	5	5	6	6	5	5	6	6	5	5	6	6	22.8	22.8	22.8	36369	325	325;165	1	57	0	21621	By MS/MS	By MS/MS	By MS/MS	By MS/MS	By MS/MS	By MS/MS	15.1	15.1	15.1	12.9	20.6	19.7	3862600000	677960000	877640000	439030000	1331900000
tr|Q4DG86|Q4DG86_TRYCC	tr|Q4DG86|Q4DG86_TRYCC	9	9	1	>tr|Q4DG86|Q4DG86_TRYCC 25 kDa translation elongation factor 1-beta, putative OS=Trypanosoma cruzi (strain CL Brener) GN=Tc00.1047053506201.39 PE=3 SV=1	1	9	9	1	22	4	3	9	6	4	3	9	6	0	0	1	1	55	55	6.8	24409	222	222	1	77	0	178.87	By MS/MS	By MS/MS	By MS/MS	By MS/MS	By MS/MS	By MS/MS	29.7	25.7	29.7	25.7	55	41.9	6916000000	649210000	845760000	1478900000	3219600000
tr|Q4D4L4|Q4D4L4_TRYCC	tr|Q4D4L4|Q4D4L4_TRYCC	6	6	1	>tr|Q4D4L4|Q4D4L4_TRYCC 40S ribosomal protein S11, putative OS=Trypanosoma cruzi (strain CL Brener) GN=Tc00.1047053507837.50 PE=3 SV=1	1	6	6	1	22	6	6	5	5	6	6	5	5	1	1	1	1	28.4	28.4	6.2	20286	176	176	1	51	0	33022	By MS/MS	By matching	By MS/MS	By MS/MS	By MS/MS	By MS/MS	28.4	28.4	15.3	9.1	28.4	28.4	3751300000	395250000	624660000	864670000	1653500000
tr|Q4CMT2|Q4CMT2_TRYCC;tr|Q4D5A7|Q4D5A7_TRYCC	tr|Q4CMT2|Q4CMT2_TRYCC;tr|Q4D5A7|Q4D5A7_TRYCC	6;6	6;6	6;6	>tr|Q4CMT2|Q4CMT2_TRYCC Microtubule-associated protein, putative (Fragment) OS=Trypanosoma cruzi (strain CL Brener) GN=Tc00.1047053507447.19 PE=4 SV=1;>tr|Q4D5A7|Q4D5A7_TRYCC Microtubule-associated protein, putative (Fragment) OS=Trypanosoma cruzi (strain	2	6	6	6	22	5	5	6	6	5	5	6	6	5	5	6	6	83.7	83.7	83.7	85213	738	738;1091	1	91	0	52613	By MS/MS	By MS/MS	By MS/MS	By MS/MS	By MS/MS	By MS/MS	63.1	63.1	63.1	83.7	83.7	83.7	21354000000	2606300000	3093000000	2529500000	4650400000
tr|Q4D123|Q4D123_TRYCC	tr|Q4D123|Q4D123_TRYCC	7	7	4	>tr|Q4D123|Q4D123_TRYCC Malate dehydrogenase OS=Trypanosoma cruzi (strain CL Brener) GN=Tc00.1047053510437.40 PE=3 SV=1	1	7	7	4	22	4	5	6	7	4	5	6	7	2	3	3	4	28.6	28.6	19	35508	332	332	1	56	0	69083	By MS/MS	By MS/MS	By MS/MS	By MS/MS	By MS/MS	By MS/MS	16	22	9.3	6.3	26.2	28.6	3380600000	496260000	701490000	554990000	1381000000
tr|Q4DIT6|Q4DIT6_TRYCC;tr|Q4CSY6|Q4CSY6_TRYCC	tr|Q4DIT6|Q4DIT6_TRYCC	6;1	6;1	6;1	>tr|Q4DIT6|Q4DIT6_TRYCC Thiolase protein-like protein, putative OS=Trypanosoma cruzi (strain CL Brener) GN=Tc00.1047053511389.150 PE=3 SV=1	2	6	6	6	22	6	6	5	5	6	6	5	5	6	6	5	5	16.6	16.6	16.6	48043	447	447;218	1	77	0	24412	By MS/MS	By MS/MS	By MS/MS	By MS/MS	By MS/MS	By MS/MS	16.6	16.6	12.3	15	16.6	12.3	3590000000	655530000	829000000	567800000	659460000
tr|Q4DDB3|Q4DDB3_TRYCC;tr|Q4D0G6|Q4D0G6_TRYCC	tr|Q4DDB3|Q4DDB3_TRYCC;tr|Q4D0G6|Q4D0G6_TRYCC	7;6	7;6	7;6	>tr|Q4DDB3|Q4DDB3_TRYCC Uncharacterized protein OS=Trypanosoma cruzi (strain CL Brener) GN=Tc00.1047053505193.100 PE=4 SV=1;>tr|Q4D0G6|Q4D0G6_TRYCC Uncharacterized protein OS=Trypanosoma cruzi (strain CL Brener) GN=Tc00.1047053506467.29 PE=4 SV=1	2	7	7	7	22	4	5	7	6	4	5	7	6	4	5	7	6	27.1	27.1	27.1	39755	354	354;354	1	60	0	54641	By MS/MS	By MS/MS	By MS/MS	By MS/MS	By MS/MS	By MS/MS	12.1	18.6	12.1	7.9	27.1	22.9	3417100000	549700000	765960000	605830000	738820000
tr|Q4CV38|Q4CV38_TRYCC;tr|Q4DTS0|Q4DTS0_TRYCC;tr|Q4DT54|Q4DT54_TRYCC	tr|Q4CV38|Q4CV38_TRYCC	6;1;1	5;0;0	5;0;0	>tr|Q4CV38|Q4CV38_TRYCC Rab1 small GTP-binding protein, putative OS=Trypanosoma cruzi (strain CL Brener) GN=Tc00.1047053503689.4 PE=4 SV=1	3	6	5	5	22	5	5	6	6	5	5	5	5	5	5	5	5	35.6	30.6	30.6	24598	219	219;211;211	1	63	0	90.06	By MS/MS	By MS/MS	By MS/MS	By MS/MS	By MS/MS	By MS/MS	30.6	30.6	29.2	29.2	35.6	35.6	2290300000	328460000	451140000	434330000	675430000
tr|Q4DVM5|Q4DVM5_TRYCC	tr|Q4DVM5|Q4DVM5_TRYCC	8	8	1	>tr|Q4DVM5|Q4DVM5_TRYCC 60S ribosomal protein L7, putative OS=Trypanosoma cruzi (strain CL Brener) GN=Tc00.1047053508207.100 PE=4 SV=1	1	8	8	1	22	5	4	6	7	5	4	6	7	1	1	1	1	34.3	34.3	8.7	27.92	242	242	1	73	0	28834	By MS/MS	By MS/MS	By MS/MS	By matching	By MS/MS	By MS/MS	23.6	23.1	26.9	31	27.3	30.6	5485900000	352700000	337430000	953940000	3142400000
tr|Q4E3K7|Q4E3K7_TRYCC	tr|Q4E3K7|Q4E3K7_TRYCC	6	6	6	>tr|Q4E3K7|Q4E3K7_TRYCC Rab GDP dissociation inhibitor OS=Trypanosoma cruzi (strain CL Brener) GN=Tc00.1047053510329.60 PE=3 SV=1	1	6	6	6	22	5	5	6	6	5	5	6	6	5	5	6	6	17.5	17.5	17.5	49626	445	445	1	59	0	21135	By MS/MS	By MS/MS	By MS/MS	By MS/MS	By MS/MS	By MS/MS	14.6	14.6	9.4	12.1	17.5	17.5	3121400000	495440000	578600000	505470000	976780000
tr|Q4DP89|Q4DP89_TRYCC	tr|Q4DP89|Q4DP89_TRYCC	7	7	6	>tr|Q4DP89|Q4DP89_TRYCC Eukaryotic peptide chain release factor subunit 1, putative OS=Trypanosoma cruzi (strain CL Brener) GN=Tc00.1047053506127.110 PE=4 SV=1	1	7	7	6	22	4	4	7	7	4	4	7	7	4	4	6	6	22.6	22.6	19.5	50785	452	452	1	64	0	55567	By MS/MS	By MS/MS	By MS/MS	By MS/MS	By MS/MS	By MS/MS	12.4	12.4	12.4	12.4	22.6	22.6	4172300000	480440000	660770000	940770000	1549000000
tr|Q4D930|Q4D930_TRYCC	tr|Q4D930|Q4D930_TRYCC	7	7	2	>tr|Q4D930|Q4D930_TRYCC Heat shock protein DnaJ, putative (Fragment) OS=Trypanosoma cruzi (strain CL Brener) GN=Tc00.1047053510165.10 PE=4 SV=1	1	7	7	2	22	5	6	4	7	5	6	4	7	2	2	2	2	28.2	28.2	8.9	32564	291	291	1	44	0	22483	By MS/MS	By MS/MS	By MS/MS	By MS/MS	By MS/MS	By MS/MS	20.6	23.4	12.4	12.4	16.5	28.2	1523000000	242810000	425860000	152440000	590800000
tr|Q4DAY6|Q4DAY6_TRYCC;tr|Q4CWA4|Q4CWA4_TRYCC	tr|Q4DAY6|Q4DAY6_TRYCC;tr|Q4CWA4|Q4CWA4_TRYCC	6;4	6;4	6;4	>tr|Q4DAY6|Q4DAY6_TRYCC ABC transporter, putative OS=Trypanosoma cruzi (strain CL Brener) GN=Tc00.1047053506579.10 PE=4 SV=1;>tr|Q4CWA4|Q4CWA4_TRYCC ABC transporter, putative (Fragment) OS=Trypanosoma cruzi (strain CL Brener) GN=Tc00.1047053507241.39 PE=4	2	6	6	6	22	5	6	6	5	5	6	6	5	5	6	6	5	11.9	11.9	11.9	78194	700	700;290	1	50	0	13365	By MS/MS	By MS/MS	By MS/MS	By MS/MS	By MS/MS	By MS/MS	10.1	11.9	6.6	4.4	11.9	9.7	2339200000	381510000	631240000	408870000	330670000
tr|Q4E2T7|Q4E2T7_TRYCC	tr|Q4E2T7|Q4E2T7_TRYCC	7	7	7	>tr|Q4E2T7|Q4E2T7_TRYCC Uncharacterized protein OS=Trypanosoma cruzi (strain CL Brener) GN=Tc00.1047053511283.220 PE=4 SV=1	1	7	7	7	22	6	3	6	7	6	3	6	7	6	3	6	7	16.4	16.4	16.4	61761	561	561	1	59	0	87423	By MS/MS	By MS/MS	By MS/MS	By MS/MS	By MS/MS	By MS/MS	15.2	4.5	5.7	11.4	14.8	16.4	2200600000	386150000	369460000	460640000	557220000
tr|Q4D7T7|Q4D7T7_TRYCC	tr|Q4D7T7|Q4D7T7_TRYCC	7	7	7	>tr|Q4D7T7|Q4D7T7_TRYCC Uncharacterized protein OS=Trypanosoma cruzi (strain CL Brener) GN=Tc00.1047053504047.50 PE=4 SV=1	1	7	7	7	22	5	5	6	6	5	5	6	6	5	5	6	6	6.2	6.2	6.2	158.04	1442	1442	1	59	0	16138	By MS/MS	By MS/MS	By MS/MS	By MS/MS	By MS/MS	By MS/MS	4	4	2.2	3.1	5.3	5.1	5396600000	835140000	1095100000	851190000	1125600000
tr|Q4DVM4|Q4DVM4_TRYCC;tr|Q4DNZ7|Q4DNZ7_TRYCC	tr|Q4DVM4|Q4DVM4_TRYCC;tr|Q4DNZ7|Q4DNZ7_TRYCC	8;8	1;1	1;1	>tr|Q4DVM4|Q4DVM4_TRYCC 60S ribosomal protein L7, putative OS=Trypanosoma cruzi (strain CL Brener) GN=Tc00.1047053508207.110 PE=4 SV=1;>tr|Q4DNZ7|Q4DNZ7_TRYCC 60S ribosomal protein L7, putative OS=Trypanosoma cruzi (strain CL Brener) GN=Tc00.1047053507519.	2	8	1	1	22	5	4	6	7	1	1	1	1	1	1	1	1	34.3	8.7	8.7	27926	242	242;242	1	26	0	15242	By MS/MS	By MS/MS	By MS/MS	By MS/MS	By MS/MS	By MS/MS	23.6	23.1	26.9	31	27.3	30.6	1380500000	147370000	298640000	335470000	497250000
tr|Q4DK58|Q4DK58_TRYCC	tr|Q4DK58|Q4DK58_TRYCC	9	9	2	>tr|Q4DK58|Q4DK58_TRYCC Uncharacterized protein OS=Trypanosoma cruzi (strain CL Brener) GN=Tc00.1047053511871.110 PE=4 SV=1	1	9	9	2	22	3	5	6	8	3	5	6	8	1	1	1	1	37.2	37.2	10	40.55	371	371	1	66	0	97014	By MS/MS	By MS/MS	By MS/MS	By MS/MS	By MS/MS	By MS/MS	14.3	21.3	14.3	19.4	26.7	32.1	3187300000	376280000	357670000	757260000	1313000000
tr|Q4CQY3|Q4CQY3_TRYCC	tr|Q4CQY3|Q4CQY3_TRYCC	6	6	2	>tr|Q4CQY3|Q4CQY3_TRYCC Aminopeptidase P1, putative OS=Trypanosoma cruzi (strain CL Brener) GN=Tc00.1047053503991.20 PE=3 SV=1	1	6	6	2	22	5	5	6	6	5	5	6	6	1	1	2	2	11.2	11.2	5	66379	596	596	1	54	0	21.16	By MS/MS	By MS/MS	By MS/MS	By MS/MS	By MS/MS	By MS/MS	8.4	8.4	7.2	8.4	11.2	11.2	2349500000	401690000	521890000	315940000	606270000
tr|Q4DGZ9|Q4DGZ9_TRYCC	tr|Q4DGZ9|Q4DGZ9_TRYCC	6	6	6	>tr|Q4DGZ9|Q4DGZ9_TRYCC Uncharacterized protein OS=Trypanosoma cruzi (strain CL Brener) GN=Tc00.1047053511809.90 PE=4 SV=1	1	6	6	6	22	5	6	6	5	5	6	6	5	5	6	6	5	30.2	30.2	30.2	121.86	1093	1093	1	73	0	118.14	By MS/MS	By MS/MS	By MS/MS	By MS/MS	By MS/MS	By MS/MS	25.1	30.2	25.1	30.2	30.2	28.2	4775900000	823760000	1217100000	569590000	1025600000
tr|Q4DW33|Q4DW33_TRYCC	tr|Q4DW33|Q4DW33_TRYCC	7	7	7	>tr|Q4DW33|Q4DW33_TRYCC Uncharacterized protein OS=Trypanosoma cruzi (strain CL Brener) GN=Tc00.1047053507681.210 PE=4 SV=1	1	7	7	7	22	5	5	6	6	5	5	6	6	5	5	6	6	8.4	8.4	8.4	136.74	1231	1231	1	64	0	68497	By MS/MS	By MS/MS	By MS/MS	By MS/MS	By MS/MS	By MS/MS	5.7	5.7	5.7	6.5	6.5	7.6	2933300000	518550000	786040000	404890000	673360000
tr|Q4DAW0|Q4DAW0_TRYCC	tr|Q4DAW0|Q4DAW0_TRYCC	9	1	1	>tr|Q4DAW0|Q4DAW0_TRYCC Proteasome subunit alpha type OS=Trypanosoma cruzi (strain CL Brener) GN=Tc00.1047053504069.53 PE=3 SV=1	1	9	1	1	22	5	4	6	7	1	1	1	1	1	1	1	1	38.4	5.7	5.7	27151	245	245	1	9	0	99184	By MS/MS	By MS/MS	By matching	By MS/MS	By MS/MS	By MS/MS	21.6	20.4	19.2	23.7	30.2	31.4	663390000	177020000	168810000	110790000	164360000
tr|Q4DTI7|Q4DTI7_TRYCC	tr|Q4DTI7|Q4DTI7_TRYCC	8	8	8	>tr|Q4DTI7|Q4DTI7_TRYCC Uncharacterized protein OS=Trypanosoma cruzi (strain CL Brener) GN=Tc00.1047053507053.180 PE=4 SV=1	1	8	8	8	22	4	3	7	8	4	3	7	8	4	3	7	8	12.2	12.2	12.2	88109	809	809	1	70	0	29676	By MS/MS	By MS/MS	By MS/MS	By MS/MS	By MS/MS	By MS/MS	6.4	4.9	6.6	6.4	12.1	12.2	2355200000	402710000	279810000	572620000	781200000
tr|Q4DD39|Q4DD39_TRYCC	tr|Q4DD39|Q4DD39_TRYCC	6	2	2	>tr|Q4DD39|Q4DD39_TRYCC Glucosamine-6-phosphate isomerase OS=Trypanosoma cruzi (strain CL Brener) GN=Tc00.1047053511025.50 PE=3 SV=1	1	6	2	2	22	5	5	6	6	1	1	2	2	1	1	2	2	30.5	11.8	11.8	31442	279	279	1	20	0	50819	By MS/MS	By matching	By MS/MS	By MS/MS	By MS/MS	By MS/MS	22.9	22.9	22.9	20.1	30.5	30.5	886000000	106010000	137160000	207250000	261930000
tr|Q4DSR2|Q4DSR2_TRYCC;tr|Q4DA84|Q4DA84_TRYCC	tr|Q4DSR2|Q4DSR2_TRYCC;tr|Q4DA84|Q4DA84_TRYCC	7;5	6;4	6;4	>tr|Q4DSR2|Q4DSR2_TRYCC Multifunctional fusion protein OS=Trypanosoma cruzi (strain CL Brener) GN=Tc00.1047053509937.20 PE=3 SV=1;>tr|Q4DA84|Q4DA84_TRYCC Multifunctional fusion protein OS=Trypanosoma cruzi (strain CL Brener) GN=Tc00.1047053506795.44 PE=3 S	2	7	6	6	22	4	6	5	7	3	6	4	6	3	6	4	6	12.1	10.8	10.8	63994	595	595;591	1	54	0	17219	By MS/MS	By MS/MS	By MS/MS	By MS/MS	By MS/MS	By MS/MS	9.1	10.8	6.2	9.2	10.8	12.1	1745400000	192870000	349250000	329330000	616070000
tr|Q4CLL9|Q4CLL9_TRYCC	tr|Q4CLL9|Q4CLL9_TRYCC	7	7	7	>tr|Q4CLL9|Q4CLL9_TRYCC Uncharacterized protein (Fragment) OS=Trypanosoma cruzi (strain CL Brener) GN=Tc00.1047053504043.10 PE=4 SV=1	1	7	7	7	22	5	5	6	6	5	5	6	6	5	5	6	6	18.4	18.4	18.4	61.8	564	564	1	51	0	34826	By MS/MS	By MS/MS	By matching	By MS/MS	By MS/MS	By MS/MS	12.4	16.5	7.8	18.4	16.5	16.5	1140000000	189330000	211020000	169220000	357710000
tr|Q4DXK7|Q4DXK7_TRYCC	tr|Q4DXK7|Q4DXK7_TRYCC	7	7	1	>tr|Q4DXK7|Q4DXK7_TRYCC Uncharacterized protein OS=Trypanosoma cruzi (strain CL Brener) GN=Tc00.1047053506195.190 PE=4 SV=1	1	7	7	1	22	5	6	5	6	5	6	5	6	0	0	0	0	11.6	11.6	1.8	89147	783	783	1	74	0	81291	By MS/MS	By MS/MS	By MS/MS	By MS/MS	By MS/MS	By MS/MS	9.8	9.8	11.6	9.8	8.7	9.8	1873100000	253950000	503130000	227770000	494480000
tr|Q4DYM0|Q4DYM0_TRYCC	tr|Q4DYM0|Q4DYM0_TRYCC	8	8	3	>tr|Q4DYM0|Q4DYM0_TRYCC Kinesin-like protein OS=Trypanosoma cruzi (strain CL Brener) GN=Tc00.1047053504427.260 PE=3 SV=1	1	8	8	3	22	5	4	6	7	5	4	6	7	3	3	3	2	15.3	15.3	6.9	85427	750	750	1	76	0	28751	By MS/MS	By MS/MS	By MS/MS	By MS/MS	By MS/MS	By MS/MS	10	10	10	10	13.2	12.7	2166300000	230210000	427960000	287920000	801620000
tr|Q4CQA2|Q4CQA2_TRYCC	tr|Q4CQA2|Q4CQA2_TRYCC	9	2	2	>tr|Q4CQA2|Q4CQA2_TRYCC 25 kDa translation elongation factor 1-beta OS=Trypanosoma cruzi (strain CL Brener) GN=Tc00.1047053507671.30 PE=3 SV=1	1	9	2	2	22	4	3	9	6	1	1	2	2	1	1	2	2	55	16.7	16.7	24452	222	222	1	24	0	28399	By MS/MS	By MS/MS	By MS/MS	By MS/MS	By MS/MS	By MS/MS	29.7	25.7	29.7	25.7	55	41.9	2318800000	77688000	91551000	812260000	1293100000
tr|Q4CL22|Q4CL22_TRYCC	tr|Q4CL22|Q4CL22_TRYCC	7	1	1	>tr|Q4CL22|Q4CL22_TRYCC 2-oxoglutarate dehydrogenase subunit, putative (Fragment) OS=Trypanosoma cruzi (strain CL Brener) GN=Tc00.1047053408345.20 PE=4 SV=1	1	7	1	1	22	5	5	6	6	1	1	1	1	1	1	1	1	36.9	10.6	10.6	31649	274	274	1	13	0	11865	By MS/MS	By MS/MS	By MS/MS	By MS/MS	By MS/MS	By MS/MS	30.3	30.3	35.4	28.8	31.8	31.8	463630000	92317000	107040000	54315000	89112000
tr|Q4DQH3|Q4DQH3_TRYCC	tr|Q4DQH3|Q4DQH3_TRYCC	6	2	2	>tr|Q4DQH3|Q4DQH3_TRYCC 2-hydroxy-3-oxopropionate reductase, putative OS=Trypanosoma cruzi (strain CL Brener) GN=Tc00.1047053505807.180 PE=4 SV=1	1	6	2	2	22	5	5	6	6	2	2	2	2	2	2	2	2	31.5	10.3	10.3	31931	302	302	1	19	0	32499	By MS/MS	By MS/MS	By MS/MS	By MS/MS	By MS/MS	By MS/MS	24.8	24.8	21.5	21.5	31.5	31.5	590150000	86614000	105220000	123540000	197880000
tr|Q4DC65|Q4DC65_TRYCC	tr|Q4DC65|Q4DC65_TRYCC	7	7	5	>tr|Q4DC65|Q4DC65_TRYCC Uncharacterized protein OS=Trypanosoma cruzi (strain CL Brener) GN=Tc00.1047053506777.110 PE=4 SV=1	1	7	7	5	22	4	7	5	6	4	7	5	6	3	5	3	4	28.2	28.2	26	157.1	1363	1363	1	57	0	12562	By MS/MS	By MS/MS	By MS/MS	By MS/MS	By MS/MS	By MS/MS	16.2	28.2	17.7	19.4	16.9	25	1941700000	251820000	487750000	218520000	509390000
tr|Q4CR38|Q4CR38_TRYCC	tr|Q4CR38|Q4CR38_TRYCC	8	8	8	>tr|Q4CR38|Q4CR38_TRYCC Membrane associated protein, putative (Fragment) OS=Trypanosoma cruzi (strain CL Brener) GN=Tc00.1047053510649.24 PE=3 SV=1	1	8	8	8	22	5	6	5	6	5	6	5	6	5	6	5	6	6.7	6.7	6.7	240.67	2089	2089	1	57	0	54079	By MS/MS	By MS/MS	By MS/MS	By MS/MS	By MS/MS	By MS/MS	4.4	5.6	2.1	4.4	4.3	4.9	1138700000	201000000	405440000	173560000	136350000
tr|Q4DQ27|Q4DQ27_TRYCC	tr|Q4DQ27|Q4DQ27_TRYCC	7	3	3	>tr|Q4DQ27|Q4DQ27_TRYCC Phosphotransferase OS=Trypanosoma cruzi (strain CL Brener) GN=Tc00.1047053510121.20 PE=3 SV=1	1	7	3	3	22	5	4	6	7	2	1	2	3	2	1	2	3	21	8.7	8.7	52196	471	471	1	20	0	23287	By MS/MS	By matching	By matching	By matching	By MS/MS	By MS/MS	16.1	11	7.6	11	19.3	21	725680000	70654000	68278000	217660000	353770000
tr|Q4DWH5|Q4DWH5_TRYCC	tr|Q4DWH5|Q4DWH5_TRYCC	8	8	8	>tr|Q4DWH5|Q4DWH5_TRYCC Uncharacterized protein OS=Trypanosoma cruzi (strain CL Brener) GN=Tc00.1047053511725.160 PE=4 SV=1	1	8	8	8	22	4	4	7	7	4	4	7	7	4	4	7	7	6.8	6.8	6.8	181.6	1632	1632	1	43	0	18175	By MS/MS	By MS/MS	By MS/MS	By MS/MS	By MS/MS	By MS/MS	2.9	2.9	2	2.9	5.6	6.2	936830000	127250000	219460000	131460000	330170000
tr|Q4DYJ8|Q4DYJ8_TRYCC	tr|Q4DYJ8|Q4DYJ8_TRYCC	7	2	2	>tr|Q4DYJ8|Q4DYJ8_TRYCC Aminopeptidase, putative OS=Trypanosoma cruzi (strain CL Brener) GN=Tc00.1047053506211.200 PE=4 SV=1	1	7	2	2	22	5	3	7	7	1	1	2	2	1	1	2	2	28.3	7.9	7.9	42558	382	382	1	13	0	10483	By matching	By MS/MS	By matching	By matching	By MS/MS	By MS/MS	23.3	13.6	9.9	11.3	28.3	28.3	1209400000	29741000	42454000	468170000	669070000
tr|Q4CS08|Q4CS08_TRYCC	tr|Q4CS08|Q4CS08_TRYCC	8	3	3	>tr|Q4CS08|Q4CS08_TRYCC Uncharacterized protein OS=Trypanosoma cruzi (strain CL Brener) GN=Tc00.1047053503943.14 PE=4 SV=1	1	8	3	3	22	5	6	4	7	1	2	0	2	1	2	0	2	49.5	23.4	23.4	23971	214	214	1	9	0	25003	By MS/MS	By MS/MS	By matching	By MS/MS	By matching	By MS/MS	25.2	33.2	34.1	28	21	44.4	77876000	9807900	23603000	0	11813000
tr|Q4DN34|Q4DN34_TRYCC;tr|Q4CTC7|Q4CTC7_TRYCC	tr|Q4DN34|Q4DN34_TRYCC;tr|Q4CTC7|Q4CTC7_TRYCC	8;7	2;2	2;2	>tr|Q4DN34|Q4DN34_TRYCC Microtubule-associated protein Gb4, putative (Fragment) OS=Trypanosoma cruzi (strain CL Brener) GN=Tc00.1047053507615.19 PE=4 SV=1;>tr|Q4CTC7|Q4CTC7_TRYCC Mitotubule-associated protein Gb4, putative (Fragment) OS=Trypanosoma cruzi (	2	8	2	2	22	7	6	4	5	2	2	1	2	2	2	1	2	18.4	5.7	5.7	189.9	1641	1641;811	1	14	0	10.76	By MS/MS	By MS/MS	By matching	By MS/MS	By MS/MS	By matching	17.6	14.4	12.7	18.4	8	11	330050000	81450000	144020000	15737000	68688000
tr|Q4CVP6|Q4CVP6_TRYCC	tr|Q4CVP6|Q4CVP6_TRYCC	8	1	1	>tr|Q4CVP6|Q4CVP6_TRYCC Uncharacterized protein OS=Trypanosoma cruzi (strain CL Brener) GN=Tc00.1047053511863.20 PE=4 SV=1	1	8	1	1	22	3	5	6	8	1	1	1	1	1	1	1	1	32.1	4.9	4.9	40.61	371	371	1	11	0	17898	By MS/MS	By MS/MS	By matching	By MS/MS	By MS/MS	By MS/MS	14.3	21.3	9.4	14.3	26.7	32.1	524570000	17696000	9107900	143190000	332200000
tr|Q4E2W0|Q4E2W0_TRYCC	tr|Q4E2W0|Q4E2W0_TRYCC	7	1	1	>tr|Q4E2W0|Q4E2W0_TRYCC Glutamine synthetase, putative OS=Trypanosoma cruzi (strain CL Brener) GN=Tc00.1047053508175.370 PE=3 SV=1	1	7	1	1	22	4	5	7	6	0	1	1	1	0	1	1	1	23.7	3.7	3.7	49508	435	435	1	7	0	51409	By matching	By matching	By matching	By matching	By MS/MS	By MS/MS	13.3	17	13.3	11.3	23.7	19.5	113660000	0	8686200	62024000	42946000
tr|Q4E093|Q4E093_TRYCC	tr|Q4E093|Q4E093_TRYCC	7	7	7	>tr|Q4E093|Q4E093_TRYCC 40S ribosomal protein S18, putative OS=Trypanosoma cruzi (strain CL Brener) GN=Tc00.1047053506679.100 PE=3 SV=1	1	7	7	7	21	4	4	6	7	4	4	6	7	4	4	6	7	40.5	40.5	40.5	17547	153	153	1	65	0	35749	By MS/MS	By MS/MS	By MS/MS	By MS/MS	By MS/MS	By MS/MS	19	19	19	19	34	40.5	19908000000	3755300000	4734300000	3398900000	4734700000
sp|Q4DZP2|RL18_TRYCC;tr|Q4DHK0|Q4DHK0_TRYCC;tr|Q4CSL2|Q4CSL2_TRYCC	sp|Q4DZP2|RL18_TRYCC;tr|Q4DHK0|Q4DHK0_TRYCC;tr|Q4CSL2|Q4CSL2_TRYCC	6;5;4	6;5;4	6;5;4	>sp|Q4DZP2|RL18_TRYCC 60S ribosomal protein L18 OS=Trypanosoma cruzi (strain CL Brener) GN=RPL18 PE=1 SV=1;>tr|Q4DHK0|Q4DHK0_TRYCC 60S ribosomal protein L18, putative OS=Trypanosoma cruzi (strain CL Brener) GN=Tc00.1047053506181.50 PE=4 SV=1;>tr|Q4CSL2|Q4C	3	6	6	6	21	5	4	6	6	5	4	6	6	5	4	6	6	33.7	33.7	33.7	21676	193	193;298;323	1	97	0	121.36	By MS/MS	By MS/MS	By MS/MS	By MS/MS	By MS/MS	By MS/MS	22.3	16.6	22.3	22.3	33.7	33.7	21576000000	2475400000	3740600000	5075800000	8545700000
tr|Q4DDA3|Q4DDA3_TRYCC	tr|Q4DDA3|Q4DDA3_TRYCC	6	6	6	>tr|Q4DDA3|Q4DDA3_TRYCC Uncharacterized protein OS=Trypanosoma cruzi (strain CL Brener) GN=Tc00.1047053506517.149 PE=4 SV=1	1	6	6	6	21	5	5	5	6	5	5	5	6	5	5	5	6	70.1	70.1	70.1	10952	97	97	1	76	0	32957	By MS/MS	By MS/MS	By MS/MS	By MS/MS	By MS/MS	By MS/MS	56.7	56.7	56.7	56.7	56.7	70.1	10578000000	2001300000	1825100000	1813800000	2698400000
tr|Q4DXQ0|Q4DXQ0_TRYCC	tr|Q4DXQ0|Q4DXQ0_TRYCC	6	6	1	>tr|Q4DXQ0|Q4DXQ0_TRYCC Pyruvate dehydrogenase E1 component subunit beta OS=Trypanosoma cruzi (strain CL Brener) GN=Tc00.1047053510421.320 PE=4 SV=1	1	6	6	1	21	4	5	6	6	4	5	6	6	1	1	1	1	19.6	19.6	5.5	37849	347	347	1	55	0	66537	By MS/MS	By MS/MS	By MS/MS	By MS/MS	By MS/MS	By MS/MS	14.4	16.4	8.9	12.1	19.6	19.6	13051000000	2111300000	2957800000	2026100000	3269800000
tr|Q4D554|Q4D554_TRYCC;tr|Q4DS55|Q4DS55_TRYCC	tr|Q4D554|Q4D554_TRYCC;tr|Q4DS55|Q4DS55_TRYCC	7;5	7;5	7;5	>tr|Q4D554|Q4D554_TRYCC Prefoldin subunit 2, putative OS=Trypanosoma cruzi (strain CL Brener) GN=Tc00.1047053511483.40 PE=4 SV=1;>tr|Q4DS55|Q4DS55_TRYCC Prefoldin subunit 2, putative OS=Trypanosoma cruzi (strain CL Brener) GN=Tc00.1047053508777.180 PE=4 SV	2	7	7	7	21	4	4	6	7	4	4	6	7	4	4	6	7	60.8	60.8	60.8	16201	148	148;148	1	71	0	172.48	By MS/MS	By MS/MS	By MS/MS	By MS/MS	By MS/MS	By MS/MS	31.1	31.1	31.1	31.1	54.7	60.8	6077300000	1015900000	1370000000	1067600000	1640200000
tr|Q4DR82|Q4DR82_TRYCC;tr|Q4DIV5|Q4DIV5_TRYCC	tr|Q4DR82|Q4DR82_TRYCC;tr|Q4DIV5|Q4DIV5_TRYCC	6;4	6;4	6;4	>tr|Q4DR82|Q4DR82_TRYCC Sterol C-24 reductase, putative OS=Trypanosoma cruzi (strain CL Brener) GN=Tc00.1047053506577.120 PE=4 SV=1;>tr|Q4DIV5|Q4DIV5_TRYCC Sterol C-24 reductase, putative OS=Trypanosoma cruzi (strain CL Brener) GN=Tc00.1047053507709.90 PE=	2	6	6	6	21	5	6	5	5	5	6	5	5	5	6	5	5	14.5	14.5	14.5	57772	488	488;488	1	59	0	70445	By MS/MS	By MS/MS	By MS/MS	By MS/MS	By MS/MS	By MS/MS	10.9	14.5	13.1	11.5	13.1	10.9	6464700000	1094900000	2042800000	637270000	1225300000
tr|Q4CNR6|Q4CNR6_TRYCC	tr|Q4CNR6|Q4CNR6_TRYCC	6	6	6	>tr|Q4CNR6|Q4CNR6_TRYCC ATP synthase, alpha chain, mitochondrial, putative (Fragment) OS=Trypanosoma cruzi (strain CL Brener) GN=Tc00.1047053510395.10 PE=4 SV=1	1	6	6	6	21	5	5	5	6	5	5	5	6	5	5	5	6	27.9	27.9	27.9	25857	247	247	1	62	0	59919	By MS/MS	By MS/MS	By MS/MS	By MS/MS	By MS/MS	By MS/MS	21.1	21.1	21.1	21.1	23.5	27.9	5303200000	774600000	1092500000	724660000	1653800000
tr|Q4CLD0|Q4CLD0_TRYCC;tr|Q4DJT8|Q4DJT8_TRYCC	tr|Q4CLD0|Q4CLD0_TRYCC;tr|Q4DJT8|Q4DJT8_TRYCC	7;6	7;6	7;6	>tr|Q4CLD0|Q4CLD0_TRYCC Mevalonate kinase (Fragment) OS=Trypanosoma cruzi (strain CL Brener) GN=Tc00.1047053436521.9 PE=3 SV=1;>tr|Q4DJT8|Q4DJT8_TRYCC Mevalonate kinase OS=Trypanosoma cruzi (strain CL Brener) GN=Tc00.1047053509237.10 PE=3 SV=1	2	7	7	7	21	4	4	6	7	4	4	6	7	4	4	6	7	21.8	21.8	21.8	39114	362	362;328	1	66	0	15173	By MS/MS	By MS/MS	By MS/MS	By MS/MS	By MS/MS	By MS/MS	11.9	11.9	11.9	11.9	18.2	21.8	4738500000	964060000	790450000	797610000	1339700000
tr|Q4DG06|Q4DG06_TRYCC	tr|Q4DG06|Q4DG06_TRYCC	7	7	1	>tr|Q4DG06|Q4DG06_TRYCC Uncharacterized protein OS=Trypanosoma cruzi (strain CL Brener) GN=Tc00.1047053509053.140 PE=4 SV=1	1	7	7	1	21	4	5	6	6	4	5	6	6	1	1	1	1	33.5	33.5	9.6	28218	239	239	1	59	0	33823	By MS/MS	By MS/MS	By MS/MS	By MS/MS	By MS/MS	By MS/MS	24.3	29.3	27.6	25.5	33.1	33.5	3429200000	456890000	655730000	662110000	1143800000
tr|Q4DYI5|Q4DYI5_TRYCC	tr|Q4DYI5|Q4DYI5_TRYCC	7	7	7	>tr|Q4DYI5|Q4DYI5_TRYCC Dihydrolipoamide acetyltransferase, putative OS=Trypanosoma cruzi (strain CL Brener) GN=Tc00.1047053511367.70 PE=4 SV=1	1	7	7	7	21	5	4	7	5	5	4	7	5	5	4	7	5	33.8	33.8	33.8	28094	269	269	1	67	0	19264	By MS/MS	By MS/MS	By MS/MS	By MS/MS	By MS/MS	By MS/MS	23.8	26	29	26	33.8	23.8	3146600000	520490000	607240000	368350000	799310000
tr|Q4E3B3|Q4E3B3_TRYCC	tr|Q4E3B3|Q4E3B3_TRYCC	6	6	6	>tr|Q4E3B3|Q4E3B3_TRYCC Proteasome regulatory non-ATPase subunit 3, putative OS=Trypanosoma cruzi (strain CL Brener) GN=Tc00.1047053508355.150 PE=4 SV=1	1	6	6	6	21	4	5	6	6	4	5	6	6	4	5	6	6	19.2	19.2	19.2	38031	334	334	1	65	0	20289	By MS/MS	By MS/MS	By MS/MS	By MS/MS	By MS/MS	By MS/MS	14.4	14.7	10.8	10.8	19.2	19.2	3672800000	551770000	907570000	533510000	1030900000
tr|Q4DC97|Q4DC97_TRYCC;tr|Q4CZQ7|Q4CZQ7_TRYCC	tr|Q4DC97|Q4DC97_TRYCC;tr|Q4CZQ7|Q4CZQ7_TRYCC	6;6	6;6	6;6	>tr|Q4DC97|Q4DC97_TRYCC Mitogen activated protein kinase, putative OS=Trypanosoma cruzi (strain CL Brener) GN=Tc00.1047053511837.70 PE=4 SV=1;>tr|Q4CZQ7|Q4CZQ7_TRYCC Mitogen activated protein kinase, putative OS=Trypanosoma cruzi (strain CL Brener) GN=Tc00	2	6	6	6	21	5	5	6	5	5	5	6	5	5	5	6	5	17.5	17.5	17.5	48378	417	417;417	1	63	0	32134	By MS/MS	By MS/MS	By MS/MS	By MS/MS	By MS/MS	By MS/MS	14.1	14.1	14.1	12.2	17.5	14.1	3335600000	522500000	984880000	445690000	730240000
tr|Q4DIB9|Q4DIB9_TRYCC;tr|Q4CP51|Q4CP51_TRYCC	tr|Q4DIB9|Q4DIB9_TRYCC;tr|Q4CP51|Q4CP51_TRYCC	7;6	7;6	7;6	>tr|Q4DIB9|Q4DIB9_TRYCC GTP-binding nuclear protein OS=Trypanosoma cruzi (strain CL Brener) GN=Tc00.1047053509455.80 PE=3 SV=1;>tr|Q4CP51|Q4CP51_TRYCC GTP-binding nuclear protein OS=Trypanosoma cruzi (strain CL Brener) GN=Tc00.1047053503539.30 PE=3 SV=1	2	7	7	7	21	4	3	7	7	4	3	7	7	4	3	7	7	46.1	46.1	46.1	24398	217	217;280	1	46	0	39371	By MS/MS	By MS/MS	By MS/MS	By MS/MS	By MS/MS	By MS/MS	23.5	17.5	17.5	12.4	46.1	46.1	3286400000	316020000	418060000	760420000	1517300000
tr|Q4CY03|Q4CY03_TRYCC;tr|Q4DAR8|Q4DAR8_TRYCC	tr|Q4CY03|Q4CY03_TRYCC;tr|Q4DAR8|Q4DAR8_TRYCC	8;6	8;6	7;5	>tr|Q4CY03|Q4CY03_TRYCC Uncharacterized protein OS=Trypanosoma cruzi (strain CL Brener) GN=Tc00.1047053503643.30 PE=4 SV=1;>tr|Q4DAR8|Q4DAR8_TRYCC Uncharacterized protein OS=Trypanosoma cruzi (strain CL Brener) GN=Tc00.1047053506485.100 PE=4 SV=1	2	8	8	7	21	5	6	6	4	5	6	6	4	5	6	5	4	32.5	32.5	29.4	23285	194	194;194	1	64	0	92849	By MS/MS	By MS/MS	By MS/MS	By MS/MS	By MS/MS	By MS/MS	28.4	29.4	22.7	28.4	25.8	24.2	2003600000	374780000	309640000	260280000	402370000
tr|Q4DW08|Q4DW08_TRYCC;tr|Q4E0K2|Q4E0K2_TRYCC	tr|Q4DW08|Q4DW08_TRYCC;tr|Q4E0K2|Q4E0K2_TRYCC	7;6	7;6	7;6	>tr|Q4DW08|Q4DW08_TRYCC Proteasome regulatory ATPase subunit 3, putative OS=Trypanosoma cruzi (strain CL Brener) GN=Tc00.1047053507603.200 PE=3 SV=1;>tr|Q4E0K2|Q4E0K2_TRYCC Proteasome regulatory ATPase subunit 3, putative OS=Trypanosoma cruzi (strain CL Br	2	7	7	7	21	3	5	6	7	3	5	6	7	3	5	6	7	26.3	26.3	26.3	44755	403	403;403	1	65	0	29.84	By MS/MS	By MS/MS	By MS/MS	By MS/MS	By MS/MS	By MS/MS	14.4	19.6	14.4	16.4	24.1	26.3	3457400000	528720000	707450000	507870000	995200000
tr|Q4E4I9|Q4E4I9_TRYCC	tr|Q4E4I9|Q4E4I9_TRYCC	7	7	7	>tr|Q4E4I9|Q4E4I9_TRYCC Polyadenylate-binding protein OS=Trypanosoma cruzi (strain CL Brener) GN=Tc00.1047053506885.70 PE=3 SV=1	1	7	7	7	21	4	4	6	7	4	4	6	7	4	4	6	7	17	17	17	63852	570	570	1	106	0	28369	By MS/MS	By MS/MS	By MS/MS	By MS/MS	By MS/MS	By MS/MS	11.9	11.9	11.9	10.4	15.6	17	5457800000	890790000	1143300000	882360000	1823900000
tr|Q4E5H0|Q4E5H0_TRYCC	tr|Q4E5H0|Q4E5H0_TRYCC	7	7	7	>tr|Q4E5H0|Q4E5H0_TRYCC V-type proton ATPase subunit C OS=Trypanosoma cruzi (strain CL Brener) GN=Tc00.1047053511277.240 PE=3 SV=1	1	7	7	7	21	5	4	7	5	5	4	7	5	5	4	7	5	24.4	24.4	24.4	43.69	381	381	1	59	0	55739	By MS/MS	By MS/MS	By MS/MS	By MS/MS	By MS/MS	By MS/MS	16.3	14.2	16.3	14.2	24.4	16.3	2582900000	387120000	529590000	457280000	726670000
tr|Q4DZJ8|Q4DZJ8_TRYCC;tr|Q4DQF9|Q4DQF9_TRYCC	tr|Q4DZJ8|Q4DZJ8_TRYCC;tr|Q4DQF9|Q4DQF9_TRYCC	7;7	7;7	7;7	>tr|Q4DZJ8|Q4DZJ8_TRYCC 3-methylcrotonoyl-CoA carboxylase beta subunit, putative OS=Trypanosoma cruzi (strain CL Brener) GN=Tc00.1047053508799.170 PE=4 SV=1;>tr|Q4DQF9|Q4DQF9_TRYCC 3-methylcrotonoyl-CoA carboxylase beta subunit, putative OS=Trypanosoma cru	2	7	7	7	21	6	6	5	4	6	6	5	4	6	6	5	4	14.3	14.3	14.3	67185	616	616;616	1	59	0	56634	By MS/MS	By MS/MS	By MS/MS	By MS/MS	By MS/MS	By matching	12.3	12.3	10.7	12.3	10.2	7.6	2148800000	439310000	650260000	184400000	297320000
tr|Q4CLT8|Q4CLT8_TRYCC	tr|Q4CLT8|Q4CLT8_TRYCC	6	2	2	>tr|Q4CLT8|Q4CLT8_TRYCC Uncharacterized protein (Fragment) OS=Trypanosoma cruzi (strain CL Brener) GN=Tc00.1047053510313.20 PE=4 SV=1	1	6	2	2	21	5	4	6	6	2	2	2	2	2	2	2	2	21.6	7.5	7.5	38486	347	347	1	22	0	78864	By MS/MS	By MS/MS	By MS/MS	By MS/MS	By MS/MS	By MS/MS	17.9	14.4	14.4	13.8	21.6	21.6	1760700000	230300000	411240000	240670000	408990000
tr|Q4CU39|Q4CU39_TRYCC	tr|Q4CU39|Q4CU39_TRYCC	7	7	7	>tr|Q4CU39|Q4CU39_TRYCC L-threonine 3-dehydrogenase, putative OS=Trypanosoma cruzi (strain CL Brener) GN=Tc00.1047053507923.10 PE=4 SV=1	1	7	7	7	21	3	5	6	7	3	5	6	7	3	5	6	7	31.6	31.6	31.6	36904	332	332	1	55	0	30419	By MS/MS	By MS/MS	By MS/MS	By MS/MS	By MS/MS	By MS/MS	17.8	23.2	12.7	8.7	26.2	31.6	3338500000	309530000	394270000	851730000	1518300000
tr|Q4D0A7|Q4D0A7_TRYCC;tr|Q4CKS6|Q4CKS6_TRYCC;tr|Q4D3V0|Q4D3V0_TRYCC	tr|Q4D0A7|Q4D0A7_TRYCC;tr|Q4CKS6|Q4CKS6_TRYCC	6;4;1	6;4;1	6;4;1	>tr|Q4D0A7|Q4D0A7_TRYCC Mitogen-activated protein kinase OS=Trypanosoma cruzi (strain CL Brener) GN=Tc00.1047053509553.60 PE=3 SV=1;>tr|Q4CKS6|Q4CKS6_TRYCC Mitogen-activated protein kinase 3, putative (Fragment) OS=Trypanosoma cruzi (strain CL Brener) GN=T	3	6	6	6	21	5	4	6	6	5	4	6	6	5	4	6	6	25.3	25.3	25.3	42902	372	372;209;61	1	49	0	98324	By MS/MS	By MS/MS	By MS/MS	By MS/MS	By MS/MS	By MS/MS	21	18.8	18.8	16.4	25.3	25.3	2559000000	334480000	426910000	525840000	912650000
tr|Q4CPU7|Q4CPU7_TRYCC	tr|Q4CPU7|Q4CPU7_TRYCC	6	3	3	>tr|Q4CPU7|Q4CPU7_TRYCC Uncharacterized protein OS=Trypanosoma cruzi (strain CL Brener) GN=Tc00.1047053427789.20 PE=4 SV=1	1	6	3	3	21	4	6	5	6	3	3	3	3	3	3	3	3	23.9	15.2	15.2	37913	343	343	1	35	0	14293	By MS/MS	By MS/MS	By MS/MS	By MS/MS	By MS/MS	By MS/MS	17.8	23.9	21	17.8	20.7	23.9	1024200000	148090000	231940000	141300000	209550000
tr|Q4DPL8|Q4DPL8_TRYCC	tr|Q4DPL8|Q4DPL8_TRYCC	6	6	2	>tr|Q4DPL8|Q4DPL8_TRYCC Uncharacterized protein OS=Trypanosoma cruzi (strain CL Brener) GN=Tc00.1047053507801.60 PE=4 SV=1	1	6	6	2	21	4	6	5	6	4	6	5	6	1	2	1	2	16.6	16.6	5.3	54286	513	513	1	53	0	14885	By MS/MS	By MS/MS	By MS/MS	By MS/MS	By MS/MS	By MS/MS	12.1	16.6	14.4	12.9	14.2	16.6	1802800000	267430000	405270000	296570000	529600000
tr|Q4E5D0|Q4E5D0_TRYCC;tr|Q4E1W0|Q4E1W0_TRYCC	tr|Q4E5D0|Q4E5D0_TRYCC;tr|Q4E1W0|Q4E1W0_TRYCC	7;7	7;7	7;7	>tr|Q4E5D0|Q4E5D0_TRYCC Serine/threonine protein phosphatase type 5, putative OS=Trypanosoma cruzi (strain CL Brener) GN=Tc00.1047053511277.630 PE=4 SV=1;>tr|Q4E1W0|Q4E1W0_TRYCC Serine/threonine protein phosphatase type 5, putative OS=Trypanosoma cruzi (st	2	7	7	7	21	5	5	6	5	5	5	6	5	5	5	6	5	19.3	19.3	19.3	53614	472	472;472	1	46	0	68411	By MS/MS	By MS/MS	By MS/MS	By MS/MS	By MS/MS	By MS/MS	13.6	13.8	13.6	8.1	16.9	14.2	1887800000	230930000	387490000	358830000	604270000
tr|Q4DFC2|Q4DFC2_TRYCC;tr|Q4DDJ2|Q4DDJ2_TRYCC;tr|Q4CTJ7|Q4CTJ7_TRYCC	tr|Q4DFC2|Q4DFC2_TRYCC;tr|Q4DDJ2|Q4DDJ2_TRYCC;tr|Q4CTJ7|Q4CTJ7_TRYCC	6;3;3	6;3;3	6;3;3	>tr|Q4DFC2|Q4DFC2_TRYCC Myo-inositol-1-phosphate synthase, putative OS=Trypanosoma cruzi (strain CL Brener) GN=Tc00.1047053507609.60 PE=4 SV=1;>tr|Q4DDJ2|Q4DDJ2_TRYCC Myo-inositol-1-phosphate synthase, putative (Fragment) OS=Trypanosoma cruzi (strain CL Br	3	6	6	6	21	4	5	6	6	4	5	6	6	4	5	6	6	16.4	16.4	16.4	58371	529	529;218;225	1	42	0	23933	By MS/MS	By MS/MS	By MS/MS	By MS/MS	By MS/MS	By MS/MS	11.7	13.4	4	4	16.4	16.4	1335200000	193320000	349750000	236510000	511020000
tr|Q4DCY2|Q4DCY2_TRYCC	tr|Q4DCY2|Q4DCY2_TRYCC	6	6	6	>tr|Q4DCY2|Q4DCY2_TRYCC Uncharacterized protein OS=Trypanosoma cruzi (strain CL Brener) GN=Tc00.1047053509895.20 PE=4 SV=1	1	6	6	6	21	5	5	6	5	5	5	6	5	5	5	6	5	9.3	9.3	9.3	93.81	829	829	1	64	0	22468	By MS/MS	By MS/MS	By MS/MS	By MS/MS	By MS/MS	By MS/MS	7.7	7.7	7.7	7.7	9.3	7.7	2614600000	462130000	615380000	349540000	669590000
tr|Q4CL38|Q4CL38_TRYCC	tr|Q4CL38|Q4CL38_TRYCC	8	4	4	>tr|Q4CL38|Q4CL38_TRYCC Uncharacterized protein OS=Trypanosoma cruzi (strain CL Brener) GN=Tc00.1047053485683.10 PE=4 SV=1	1	8	4	4	21	3	3	8	7	1	3	4	4	1	3	4	4	28	16.2	16.2	45552	414	414	1	58	0	154.47	By MS/MS	By MS/MS	By MS/MS	By MS/MS	By MS/MS	By MS/MS	12.1	12.8	12.8	14.7	28	25.8	2968100000	254900000	239920000	834420000	1395600000
tr|Q4CZG6|Q4CZG6_TRYCC	tr|Q4CZG6|Q4CZG6_TRYCC	8	8	8	>tr|Q4CZG6|Q4CZG6_TRYCC Replication Factor A 28 kDa subunit, putative OS=Trypanosoma cruzi (strain CL Brener) GN=Tc00.1047053510821.50 PE=4 SV=1	1	8	8	8	21	3	4	7	7	3	4	7	7	3	4	7	7	40.2	40.2	40.2	28331	264	264	1	45	0	39984	By MS/MS	By MS/MS	By MS/MS	By MS/MS	By MS/MS	By MS/MS	14	18.2	9.8	8.3	32.2	36	1423000000	111550000	212310000	383760000	640380000
tr|Q4DCD6|Q4DCD6_TRYCC	tr|Q4DCD6|Q4DCD6_TRYCC	6	6	1	>tr|Q4DCD6|Q4DCD6_TRYCC Protein phosphatase 1, regulatory subunit, putative OS=Trypanosoma cruzi (strain CL Brener) GN=Tc00.1047053507867.60 PE=4 SV=1	1	6	6	1	21	4	6	5	6	4	6	5	6	0	1	0	1	16.4	16.4	3.5	45821	402	402	1	48	0	12804	By MS/MS	By MS/MS	By MS/MS	By MS/MS	By MS/MS	By MS/MS	12.7	16.4	12.7	9.5	12.9	16.4	1155600000	153810000	295600000	170630000	244160000
[truncated: 2,567 more rows]
[truncated: 43 more columns]
