# Supplementary material for: Proteome-Wide Analysis of Trypanosoma cruzi Exponential and Stationary Growth Phases Reveals a Subcellular Compartment-Specific Regulation
Source: Genes (Basel). 2018 Aug 15;9(8):413. doi: 10.3390/genes9080413 (PMC6115888; doi:10.3390/genes9080413)
Supplement: Supplementary file 1 [file genes-09-00413-s001.zip › Supplementary Table 2.xlsx]

## Sheet: Foglio1
Supplementary Table 2: regulated proteins
Significant	[-LOG(P-value)]	Difference Log2(Exponential-Stationary)	Protein Ids	Fasta headers	Number of proteins	Sum peptides	Intensity stationary 1	Intensity stationary 2	Intensity exponential 1	Intensity exponential 2	exponential/stationary	Peptides	Razor + unique peptides	Unique peptides	Sequence coverage [%]	Unique + razor sequence coverage [%]	Unique sequence coverage [%]	Mol. weight [kDa]	Q-value	Score	Intensity	MS/MS Count	LFQ intensity stationary 1	LFQ intensity stationary 2	LFQ intensity exponential 1	LFQ intensity exponential 2	Protein ID
+	1.74306	3.39306	Q4E088	>tr|Q4E088|Q4E088_TRYCC 40S ribosomal protein S10, putative OS=Trypanosoma cruzi (strain CL Brener) GN=Tc00.1047053506679.140 PE=4 SV=1	1	17	66577000	64238000	1089800000	1891700000	10.0897	7	7	7	41	41	41	18249	0	15762	3263100000	33	27.151	26.2738	29.9591	30.2519	Q4E088
+	2.95338	2.66336	Q4E078	>tr|Q4E078|Q4E078_TRYCC Ribosomal protein L24, putative OS=Trypanosoma cruzi (strain CL Brener) GN=Tc00.1047053503611.20 PE=1 SV=1	1	7	192290000	240570000	1245700000	1347400000	6.32598	2	2	2	248	248	248	14602	0	29853	3172300000	24	27.4318	27.2652	30.043	29.9807	Q4E078
+	2.13816	2.23425	Q4E3M0	>tr|Q4E3M0|Q4E3M0_TRYCC 40S ribosomal protein S21, putative OS=Trypanosoma cruzi (strain CL Brener) GN=Tc00.1047053510101.420 PE=4 SV=1;>tr|Q4E3L9|Q4E3L9_TRYCC 40S ribosomal protein S21, putative OS=Trypanosoma cruzi (strain CL Brener) GN=Tc00.104705351010	2	19	97292000	187780000	804300000	1961800000	4.68809	6	6	1	229	229	34	2604	0	27816	3177400000	46	27.3171	27.6393	29.6087	29.8162	Q4E3M0
+	1.3487	2.18248	Q4DZ31	>tr|Q4DZ31|Q4DZ31_TRYCC 60S ribosomal protein L18a OS=Trypanosoma cruzi (strain CL Brener) GN=Tc00.1047053511001.120 PE=1 SV=1;>tr|Q4DKZ4|Q4DKZ4_TRYCC 60S ribosomal protein L18a OS=Trypanosoma cruzi (strain CL Brener) GN=Tc00.1047053506957.90 PE=3 SV=1	2	17	241270000	234000000	868950000	2385400000	4.75421	6	6	6	38	38	38	2075	0	39259	3932800000	34	27.7624	28.0179	29.6118	30.5334	Q4DZ31
+	2.05723	2.01596	Q4CYD2	>tr|Q4CYD2|Q4CYD2_TRYCC Nucleolar RNA helicase II, putative OS=Trypanosoma cruzi (strain CL Brener) GN=Tc00.1047053506123.40 PE=4 SV=1;>tr|Q4CUA4|Q4CUA4_TRYCC Nucleolar RNA helicase II, putative OS=Trypanosoma cruzi (strain CL Brener) GN=Tc00.1047053508205	2	30	299090000	268410000	857910000	1804200000	4.0693	12	12	12	21	21	21	69148	0	18306	3287800000	58	28.0027	27.8573	29.7704	30.1215	Q4CYD2
+	1.25004	1.95774	Q4CZ48	>tr|Q4CZ48|Q4CZ48_TRYCC Cytochrome c oxidase subunit 10, putative OS=Trypanosoma cruzi (strain CL Brener) GN=Tc00.1047053510783.49 PE=4 SV=1;>tr|Q4CM35|Q4CM35_TRYCC Cytochrome c oxidase subunit 10, putative OS=Trypanosoma cruzi (strain CL Brener) GN=Tc00.1	3	11	39665000	186440000	397000000	734980000	4.07207	4	4	4	478	478	478	13851	0	15558	1501900000	9	26.5232	26.7886	28.1472	29.08	Q4CZ48
+	2.05555	1.80889	Q4D4L4	>tr|Q4D4L4|Q4D4L4_TRYCC 40S ribosomal protein S11, putative OS=Trypanosoma cruzi (strain CL Brener) GN=Tc00.1047053507837.50 PE=3 SV=1	1	22	395250000	624660000	864670000	1653500000	3.52608	6	6	1	284	284	62	20286	0	33022	3751300000	28	28.2054	28.2782	29.8838	30.2175	Q4D4L4
+	2.94567	1.77598	Q4DGX6	>tr|Q4DGX6|Q4DGX6_TRYCC Peptidase M20/M25/M40, putative OS=Trypanosoma cruzi (strain CL Brener) GN=Tc00.1047053509213.120 PE=4 SV=1	1	60	960940000	1139500000	1653000000	2552900000	3.42177	19	5	5	492	196	196	5128	0	12607	7462000000	77	29.4628	29.3433	31.1762	31.1818	Q4DGX6
+	2.19301	1.64629	Q4DQQ3	>tr|Q4DQQ3|Q4DQQ3_TRYCC Uncharacterized protein OS=Trypanosoma cruzi (strain CL Brener) GN=Tc00.1047053509167.140 PE=4 SV=1	2	29	345910000	413590000	2032300000	3742600000	3.1201	10	10	6	396	396	268	41574	0	21464	6856300000	73	29.2159	28.9664	30.782	30.6929	Q4DQQ3
+	0.913775	1.57825	Q4E1C5	>tr|Q4E1C5|Q4E1C5_TRYCC Uncharacterized protein OS=Trypanosoma cruzi (strain CL Brener) GN=Tc00.1047053511807.200 PE=4 SV=1	1	28	107170000	75395000	465590000	855350000	2.94245	11	11	11	107	107	107	169	0	7538	1510200000	34	27.5616	26.6309	28.2827	29.0663	Q4E1C5
+	2.63693	1.5731	Q4CQY1	>tr|Q4CQY1|Q4CQY1_TRYCC Uncharacterized protein (Fragment) OS=Trypanosoma cruzi (strain CL Brener) GN=Tc00.1047053503991.39 PE=4 SV=1	1	15	484380000	577990000	959290000	1566800000	2.97188	4	1	1	293	136	136	2117	0	10527	4153100000	37	28.6033	28.4571	30.1229	30.0837	Q4CQY1
+	1.61617	1.52948	Q4DEK4	>tr|Q4DEK4|Q4DEK4_TRYCC 40S ribosomal protein S16, putative OS=Trypanosoma cruzi (strain CL Brener) GN=Tc00.1047053503899.20 PE=4 SV=1;>tr|Q4D916|Q4D916_TRYCC 40S ribosomal protein S16, putative OS=Trypanosoma cruzi (strain CL Brener) GN=Tc00.1047053507513	2	14	351620000	697230000	924300000	1995000000	2.87103	5	5	5	349	349	349	16807	0	78315	4352600000	16	28.8118	28.4076	30.0054	30.273	Q4DEK4
+	1.32774	1.51427	Q4D1T6	>tr|Q4D1T6|Q4D1T6_TRYCC Ubiquitin/ribosomal protein S27a, putative OS=Trypanosoma cruzi (strain CL Brener) GN=Tc00.1047053510409.39 PE=4 SV=1;>tr|Q4CXN0|Q4CXN0_TRYCC Ubiquitin/ribosomal protein S27a, putative OS=Trypanosoma cruzi (strain CL Brener) GN=Tc00	3	14	250000000	386670000	1047400000	1958800000	2.91172	5	5	2	273	273	87	16574	0	97699	3772500000	39	28.1839	28.4505	29.5182	30.1448	Q4D1T6
+	1.68961	1.50701	Q4DYK2	>tr|Q4DYK2|Q4DYK2_TRYCC ADP,ATP carrier protein 1, mitochondrial, putative OS=Trypanosoma cruzi (strain CL Brener) GN=Tc00.1047053506211.160 PE=3 SV=1	1	40	332570000	776840000	1405100000	2568900000	2.84391	10	2	2	366	118	118	34955	0	81981	5371800000	42	28.7613	29.0624	30.2601	30.5776	Q4DYK2
+	1.58768	1.48826	Q4CL38	>tr|Q4CL38|Q4CL38_TRYCC Uncharacterized protein OS=Trypanosoma cruzi (strain CL Brener) GN=Tc00.1047053485683.10 PE=4 SV=1	1	21	254900000	239920000	834420000	1395600000	2.77075	8	4	4	28	162	162	45552	0	15447	2968100000	37	28.2672	27.7946	29.5799	29.4583	Q4CL38
+	2.47395	1.475	Q4DJZ6	>tr|Q4DJZ6|Q4DJZ6_TRYCC Ribosomal protein L15 OS=Trypanosoma cruzi (strain CL Brener) GN=Tc00.1047053506945.290 PE=3 SV=1;>tr|Q4CTG9|Q4CTG9_TRYCC Ribosomal protein L15 OS=Trypanosoma cruzi (strain CL Brener) GN=Tc00.1047053510767.10 PE=1 SV=1	2	12	268720000	360690000	860390000	1393400000	2.77841	3	3	3	142	142	142	24223	0	71446	3124600000	24	28.1336	28.2712	29.6264	29.7285	Q4DJZ6
+	1.52927	1.4369	Q4DXX8	>tr|Q4DXX8|Q4DXX8_TRYCC Nucleolar GTP-binding protein 1 OS=Trypanosoma cruzi (strain CL Brener) GN=Tc00.1047053510431.160 PE=3 SV=1	1	26	79526000	185690000	411700000	682810000	2.71884	10	10	10	24	24	24	74646	0	24287	1361500000	25	26.9982	27.3022	28.3852	28.789	Q4DXX8
+	2.62687	1.43304	Q4DEF3	>tr|Q4DEF3|Q4DEF3_TRYCC NADP-dependent alcohol hydrogenase, putative OS=Trypanosoma cruzi (strain CL Brener) GN=Tc00.1047053508677.80 PE=3 SV=1;>tr|Q4CSB2|Q4CSB2_TRYCC NADP-dependent alcohol hydrogenase, putative (Fragment) OS=Trypanosoma cruzi (strain CL	2	34	362630000	564050000	661110000	1390800000	2.70242	11	2	2	416	94	94	37467	0	44265	3278100000	31	28.3356	28.3878	29.73	29.8594	Q4DEF3
+	1.17231	1.28484	Q4DZE3	>tr|Q4DZE3|Q4DZE3_TRYCC Uncharacterized protein OS=Trypanosoma cruzi (strain CL Brener) GN=Tc00.1047053506825.200 PE=4 SV=1	1	23	181320000	264300000	584200000	963400000	2.48827	8	8	5	201	201	155	65812	0	78724	2087800000	31	27.8745	27.6099	28.7017	29.3523	Q4DZE3
+	2.24002	1.28162	Q4DVM4	>tr|Q4DVM4|Q4DVM4_TRYCC 60S ribosomal protein L7, putative OS=Trypanosoma cruzi (strain CL Brener) GN=Tc00.1047053508207.110 PE=4 SV=1;>tr|Q4DNZ7|Q4DNZ7_TRYCC 60S ribosomal protein L7, putative OS=Trypanosoma cruzi (strain CL Brener) GN=Tc00.1047053507519.	2	22	147370000	298640000	335470000	497250000	2.43349	8	1	1	343	87	87	27926	0	15242	1380500000	22	27.1255	27.2302	28.5419	28.3771	Q4DVM4
+	0.984888	1.25037	Q4CYE8	>tr|Q4CYE8|Q4CYE8_TRYCC Uncharacterized protein OS=Trypanosoma cruzi (strain CL Brener) GN=Tc00.1047053507629.20 PE=4 SV=1	1	21	77001000	220800000	478920000	601830000	2.41491	11	11	11	204	204	204	89304	0	38162	1477300000	32	26.9642	27.4696	28.8239	28.1107	Q4CYE8
+	1.60828	1.24904	Q4DF38	>tr|Q4DF38|Q4DF38_TRYCC Cystathionine beta-synthase OS=Trypanosoma cruzi (strain CL Brener) GN=Tc00.1047053508177.110 PE=4 SV=1	1	59	96246000	143610000	304090000	367700000	2.35448	17	1	1	43	44	44	42091	0	23201	965960000	10	26.948	26.5496	27.9826	28.0132	Q4DF38
+	2.74781	1.22646	Q4DYP5	>tr|Q4DYP5|Q4DYP5_TRYCC Chaperonin HSP60, mitochondrial OS=Trypanosoma cruzi (strain CL Brener) GN=Tc00.1047053507641.290 PE=3 SV=1;>tr|Q4DYP6|Q4DYP6_TRYCC Chaperonin HSP60, mitochondrial OS=Trypanosoma cruzi (strain CL Brener) GN=Tc00.1047053507641.280 PE	4	96	18438000000	24281000000	29634000000	56280000000	2.33979	29	29	29	578	578	578	59165	0	32331	143970000000	756	33.8334	33.9099	35.063	35.1332	Q4DYP5
+	1.98943	1.1819	Q4DG45	>tr|Q4DG45|Q4DG45_TRYCC 60S ribosomal protein L26, putative OS=Trypanosoma cruzi (strain CL Brener) GN=Tc00.1047053510761.14 PE=1 SV=1	1	10	772190000	916720000	875190000	2605500000	2.2765	4	4	4	259	259	259	16299	0	10743	5652500000	26	29.2554	29.2299	30.3046	30.5444	Q4DG45
+	2.07722	1.14808	Q4DVM5	>tr|Q4DVM5|Q4DVM5_TRYCC 60S ribosomal protein L7, putative OS=Trypanosoma cruzi (strain CL Brener) GN=Tc00.1047053508207.100 PE=4 SV=1	1	22	352700000	337430000	953940000	3142400000	2.21297	8	8	1	343	343	87	2792	0	28834	5485900000	33	29.377	29.1913	30.4828	30.3818	Q4DVM5
+	1.1966	1.14694	Q4D5P4	>tr|Q4D5P4|Q4D5P4_TRYCC 40S ribosomal protein S4 OS=Trypanosoma cruzi (strain CL Brener) GN=Tc00.1047053509683.117 PE=3 SV=1	1	51	3898000000	4614000000	6268100000	11102000000	2.24903	14	14	14	473	473	473	30875	0	38215	28792000000	100	31.53	31.764	32.5135	33.0745	Q4D5P4
+	2.05114	1.14654	Q4DI49	>tr|Q4DI49|Q4DI49_TRYCC 60S ribosomal protein L23a, putative OS=Trypanosoma cruzi (strain CL Brener) GN=Tc00.1047053509151.140 PE=3 SV=1	1	15	749470000	799720000	1862700000	2815400000	2.22013	6	6	3	274	274	155	25004	0	4679	6690100000	62	29.3778	29.3766	30.4149	30.6325	Q4DI49
+	2.72754	1.08689	Q4DGT6	>tr|Q4DGT6|Q4DGT6_TRYCC Uncharacterized protein OS=Trypanosoma cruzi (strain CL Brener) GN=Tc00.1047053507081.130 PE=4 SV=1	1	36	1716300000	2407500000	3123800000	4911100000	2.12324	10	10	7	486	486	374	29932	0	12138	15331000000	127	30.648	30.7376	31.7652	31.7943	Q4DGT6
+	1.6027	1.07696	Q4E2I6	>tr|Q4E2I6|Q4E2I6_TRYCC Succinate--CoA ligase [ADP-forming] subunit alpha, mitochondrial OS=Trypanosoma cruzi (strain CL Brener) GN=Tc00.1047053508479.340 PE=3 SV=1	1	30	2046400000	4728200000	7671200000	10113000000	2.10268	9	9	9	449	449	449	31797	0	32331	27758000000	141	31.4498	31.7456	32.5841	32.7652	Q4E2I6
+	1.54674	1.04348	Q4CYN3	>tr|Q4CYN3|Q4CYN3_TRYCC Nascent polypeptide-associated complex subunit beta OS=Trypanosoma cruzi (strain CL Brener) GN=Tc00.1047053511231.80 PE=3 SV=1;>tr|Q4D103|Q4D103_TRYCC Nascent polypeptide-associated complex subunit beta OS=Trypanosoma cruzi (strain	2	18	629850000	1162700000	1242900000	3447000000	2.07565	5	5	5	446	446	446	11466	0	96617	7351000000	32	29.6019	29.681	30.5097	30.8602	Q4CYN3
+	1.71532	1.02366	Q4DUB8	>tr|Q4DUB8|Q4DUB8_TRYCC Uncharacterized protein OS=Trypanosoma cruzi (strain CL Brener) GN=Tc00.1047053506625.240 PE=4 SV=1	1	16	476520000	422320000	696500000	1280500000	2.04288	4	4	4	179	179	179	32603	0	43255	3366300000	37	28.4531	28.4149	29.3148	29.6005	Q4DUB8
+	1.27185	0.993836	Q4DTQ1	>tr|Q4DTQ1|Q4DTQ1_TRYCC 40S ribosomal protein S23, putative OS=Trypanosoma cruzi (strain CL Brener) GN=Tc00.1047053504181.20 PE=3 SV=1	1	14	579250000	1604700000	2546600000	2348500000	2.01786	4	4	4	406	406	406	15925	0	75154	8151600000	29	29.8966	29.8283	31.0934	30.6192	Q4DTQ1
+	1.05127	0.9847	Q4D579	>tr|Q4D579|Q4D579_TRYCC Proteasome subunit beta OS=Trypanosoma cruzi (strain CL Brener) GN=Tc00.1047053510689.30 PE=3 SV=1	1	8	139930000	169580000	337570000	624490000	2.01733	2	2	2	147	147	147	24212	0	21717	1377400000	15	27.414	27.2217	28.6024	28.0027	Q4D579
+	1.34401	0.979148	Q4DK88	>tr|Q4DK88|Q4DK88_TRYCC Peptide methionine sulfoxide reductase, putative OS=Trypanosoma cruzi (strain CL Brener) GN=Tc00.1047053509611.180 PE=3 SV=1	1	26	159830000	280510000	382920000	629200000	1.95081	7	3	3	412	215	215	19951	0	38881	1558000000	28	27.2903	27.715	28.4437	28.5199	Q4DK88
+	1.03368	0.968722	Q4D8U6	>tr|Q4D8U6|Q4D8U6_TRYCC Universal minicircle sequence binding protein (UMSBP) OS=Trypanosoma cruzi (strain CL Brener) GN=Tc00.1047053503781.80 PE=4 SV=1	1	27	201340000	642620000	975180000	2189100000	1.92604	8	4	0	813	425	0	14385	0	50524	4655700000	24	28.6695	29.2487	29.7986	30.0571	Q4D8U6
+	1.26922	0.962352	Q4E675	>tr|Q4E675|Q4E675_TRYCC Uncharacterized protein OS=Trypanosoma cruzi (strain CL Brener) GN=Tc00.1047053508153.164 PE=4 SV=1;>tr|Q4CPK6|Q4CPK6_TRYCC Uncharacterized protein OS=Trypanosoma cruzi (strain CL Brener) GN=Tc00.1047053508183.20 PE=4 SV=1	2	8	59797000	51173000	128930000	268680000	1.93431	2	2	2	167	167	167	21278	0	61795	508580000	13	26.2678	25.8563	26.9157	27.1331	Q4E675
+	1.5042	0.949542	Q4DC23	>tr|Q4DC23|Q4DC23_TRYCC 60S ribosomal protein L17, putative OS=Trypanosoma cruzi (strain CL Brener) GN=Tc00.1047053506213.80 PE=1 SV=1;>tr|Q4CRX5|Q4CRX5_TRYCC 60S ribosomal protein L17, putative OS=Trypanosoma cruzi (strain CL Brener) GN=Tc00.1047053503449	2	16	506160000	1343800000	1271900000	2605700000	1.92974	4	4	4	205	205	205	19114	0	12722	6646400000	37	29.3932	29.6497	30.3563	30.5858	Q4DC23
+	2.31328	0.947948	Q4DPQ8	>tr|Q4DPQ8|Q4DPQ8_TRYCC 60S ribosomal protein L2, putative OS=Trypanosoma cruzi (strain CL Brener) GN=Tc00.1047053511181.100 PE=1 SV=1;>tr|Q4D5K2|Q4D5K2_TRYCC 60S ribosomal protein L2, putative OS=Trypanosoma cruzi (strain CL Brener) GN=Tc00.1047053508299.	2	23	881390000	1736300000	2645900000	4977800000	1.93019	7	7	7	381	381	381	28375	0	11341	11243000000	57	30.4334	30.3685	31.291	31.4067	Q4DPQ8
+	1.81169	0.942074	Q4CLU9	>tr|Q4CLU9|Q4CLU9_TRYCC 40S ribosomal protein S8 OS=Trypanosoma cruzi (strain CL Brener) GN=Tc00.1047053511069.20 PE=3 SV=1;>tr|Q4CLV0|Q4CLV0_TRYCC 40S ribosomal protein S8 OS=Trypanosoma cruzi (strain CL Brener) GN=Tc00.1047053511069.10 PE=3 SV=1	2	19	914660000	1180400000	1669400000	3018700000	1.91489	7	7	3	321	321	113	25112	0	53087	7461600000	51	29.9396	29.7033	30.7708	30.7561	Q4CLU9
+	1.01938	0.940425	Q4DMV7	>tr|Q4DMV7|Q4DMV7_TRYCC Arginine N-methyltransferase, putative OS=Trypanosoma cruzi (strain CL Brener) GN=Tc00.1047053508593.110 PE=3 SV=1	1	10	22220000	77547000	169860000	151130000	1.96036	3	3	1	126	126	41	38834	0	93902	453570000	12	25.8094	25.9451	27.1241	26.5113	Q4DMV7
+	1.59275	0.940273	Q4DKP1	>tr|Q4DKP1|Q4DKP1_TRYCC Uncharacterized protein OS=Trypanosoma cruzi (strain CL Brener) GN=Tc00.1047053503897.40 PE=4 SV=1;>tr|Q4D008|Q4D008_TRYCC Uncharacterized protein OS=Trypanosoma cruzi (strain CL Brener) GN=Tc00.1047053509563.30 PE=4 SV=1	2	8	67598000	89992000	165820000	283700000	1.91581	2	2	2	57	57	57	46139	0	52352	663120000	8	26.483	26.2373	27.392	27.2088	Q4DKP1
+	1.89621	0.917722	Q4DTH7	>tr|Q4DTH7|Q4DTH7_TRYCC Fatty acid desaturase, putative OS=Trypanosoma cruzi (strain CL Brener) GN=Tc00.1047053508737.70 PE=4 SV=1;>tr|Q4CNT6|Q4CNT6_TRYCC Fatty acid desaturase, putative OS=Trypanosoma cruzi (strain CL Brener) GN=Tc00.1047053429257.20 PE=4	2	20	357890000	291490000	494600000	1091100000	1.88473	6	6	6	17	17	17	46942	0	13847	2235100000	28	28.3522	28.1491	29.144	29.1928	Q4DTH7
+	1.00384	0.909344	Q4DCQ3	>tr|Q4DCQ3|Q4DCQ3_TRYCC Superoxide dismutase OS=Trypanosoma cruzi (strain CL Brener) GN=Tc00.1047053509775.40 PE=1 SV=1;>tr|Q4D9I5|Q4D9I5_TRYCC Superoxide dismutase OS=Trypanosoma cruzi (strain CL Brener) GN=Tc00.1047053507061.30 PE=3 SV=1	2	14	329990000	578240000	921490000	1157600000	1.90924	4	4	4	193	193	193	2614	0	4043	3258900000	57	28.5007	28.7339	29.8137	29.2396	Q4DCQ3
+	1.51478	0.89366	Q4DT61	>tr|Q4DT61|Q4DT61_TRYCC RNA-binding protein, putative OS=Trypanosoma cruzi (strain CL Brener) GN=Tc00.1047053511621.50 PE=4 SV=1	1	29	1603100000	1872500000	2316600000	3903500000	1.8535	11	11	3	305	305	102	4875	0	1371	11705000000	75	30.5984	30.3322	31.2703	31.4477	Q4DT61
+	1.46559	0.883833	Q4DTM9	>tr|Q4DTM9|Q4DTM9_TRYCC Heat shock protein 70 (HSP70), putative OS=Trypanosoma cruzi (strain CL Brener) GN=Tc00.1047053511211.160 PE=3 SV=1	1	123	4581400000	5587400000	4292900000	7821300000	1.85672	34	3	2	511	34	17	7093	0	18573	28923000000	49	31.912	31.981	32.666	32.9946	Q4DTM9
+	1.45591	0.880177	Q4CTS7	>tr|Q4CTS7|Q4CTS7_TRYCC Tryptophanyl-tRNA synthetase, putative OS=Trypanosoma cruzi (strain CL Brener) GN=Tc00.1047053510647.30 PE=3 SV=1	1	15	135250000	215900000	276540000	494310000	1.82812	5	5	5	165	165	165	44316	0	65648	1278500000	22	27.1822	26.8446	27.8834	27.9038	Q4CTS7
+	1.58874	0.861026	Q4DG86	>tr|Q4DG86|Q4DG86_TRYCC 25 kDa translation elongation factor 1-beta, putative OS=Trypanosoma cruzi (strain CL Brener) GN=Tc00.1047053506201.39 PE=3 SV=1	1	22	649210000	845760000	1478900000	3219600000	1.82484	9	9	1	55	55	68	24409	0	17887	6916000000	47	29.582	29.6095	30.3165	30.5971	Q4DG86
+	1.72342	0.858088	Q4E1B5	>tr|Q4E1B5|Q4E1B5_TRYCC Uncharacterized protein OS=Trypanosoma cruzi (strain CL Brener) GN=Tc00.1047053511807.290 PE=4 SV=1	1	18	199960000	167570000	347950000	535150000	1.8125	6	6	6	336	336	336	3703	0	82387	1525800000	52	27.4287	27.2576	28.285	28.1175	Q4E1B5
+	2.49135	0.856123	Q4CVQ4	>tr|Q4CVQ4|Q4CVQ4_TRYCC 60S acidic ribosomal protein P2 beta (H6.4), putative OS=Trypanosoma cruzi (strain CL Brener) GN=Tc00.1047053509165.40 PE=3 SV=1	1	16	1601400000	1729500000	1937500000	2790500000	1.80943	4	4	1	364	364	103	10572	0	69036	9774300000	25	30.2609	30.1706	31.0536	31.0902	Q4CVQ4
+	1.94877	0.852721	Q4DG22	>tr|Q4DG22|Q4DG22_TRYCC Uncharacterized protein OS=Trypanosoma cruzi (strain CL Brener) GN=Tc00.1047053508241.130 PE=4 SV=1	1	28	186000000	141670000	325290000	516200000	1.80239	9	9	9	115	115	115	12055	0	74407	1214400000	36	27.1755	26.9942	27.9478	27.9273	Q4DG22
+	2.04318	0.851225	Q4CQ63	>tr|Q4CQ63|Q4CQ63_TRYCC 40S ribosomal protein SA OS=Trypanosoma cruzi (strain CL Brener) GN=Tc00.1047053510425.19 PE=3 SV=1	2	38	1597300000	1996800000	3223600000	4866500000	1.80689	11	11	3	469	469	151	27848	0	15016	13149000000	105	30.6663	30.6557	31.5936	31.4308	Q4CQ63
+	1.81413	0.846765	Q4CU39	>tr|Q4CU39|Q4CU39_TRYCC L-threonine 3-dehydrogenase, putative OS=Trypanosoma cruzi (strain CL Brener) GN=Tc00.1047053507923.10 PE=4 SV=1	1	21	309530000	394270000	851730000	1518300000	1.80092	7	7	7	316	316	316	36904	0	30419	3338500000	39	28.561	28.4554	29.263	29.447	Q4CU39
+	2.2398	0.800014	Q4DW38	>tr|Q4DW38|Q4DW38_TRYCC 40S ribosomal protein S24 OS=Trypanosoma cruzi (strain CL Brener) GN=Tc00.1047053507681.150 PE=3 SV=1	1	22	885840000	1132300000	1680100000	2953300000	1.74215	7	7	7	445	445	445	15667	0	61376	7562100000	30	29.7544	29.8042	30.6349	30.5236	Q4DW38
+	1.63708	0.79867	Q4CZG5	>tr|Q4CZG5|Q4CZG5_TRYCC Ribonucleoprotein p18, mitochondrial, putative OS=Trypanosoma cruzi (strain CL Brener) GN=Tc00.1047053510821.60 PE=4 SV=1	1	23	903410000	1356500000	1125300000	2452500000	1.73533	6	6	6	242	242	242	27075	0	67465	6789600000	61	29.5805	29.8052	30.4403	30.5427	Q4CZG5
+	1.19714	0.797424	Q4DHV9	>tr|Q4DHV9|Q4DHV9_TRYCC Nucleolar RNA-binding protein, putative OS=Trypanosoma cruzi (strain CL Brener) GN=Tc00.1047053507649.80 PE=4 SV=1	1	25	821460000	1079500000	1390300000	2483500000	1.75625	9	9	9	608	608	608	40999	0	17814	6524900000	61	29.5995	29.5559	30.1651	30.5851	Q4DHV9
+	1.84571	0.787249	Q4E4R1	>tr|Q4E4R1|Q4E4R1_TRYCC 60S ribosomal protein L23, putative OS=Trypanosoma cruzi (strain CL Brener) GN=Tc00.1047053508461.480 PE=3 SV=1;>tr|Q4E4R0|Q4E4R0_TRYCC 60S ribosomal protein L23, putative OS=Trypanosoma cruzi (strain CL Brener) GN=Tc00.104705350846	2	22	353900000	780060000	1217400000	1723900000	1.72843	6	6	6	554	554	554	1493	0	33128	4544000000	91	28.7393	28.6664	29.5779	29.4023	Q4E4R1
+	1.13274	0.78544	Q4DIX2	>tr|Q4DIX2|Q4DIX2_TRYCC Uncharacterized protein OS=Trypanosoma cruzi (strain CL Brener) GN=Tc00.1047053506287.120 PE=4 SV=1	1	12	92483000	118540000	193340000	391600000	1.7447	4	4	2	108	108	55	67958	0	41075	847710000	15	26.7873	26.8077	27.8086	27.3573	Q4DIX2
+	1.60164	0.784714	Q4DUG8	>tr|Q4DUG8|Q4DUG8_TRYCC Cystathione gamma lyase, putative OS=Trypanosoma cruzi (strain CL Brener) GN=Tc00.1047053510661.250 PE=3 SV=1	1	28	2680900000	3976600000	4025200000	7765400000	1.71888	9	9	4	257	257	12	44489	0	43722	22342000000	86	31.2739	31.4991	32.1135	32.2289	Q4DUG8
+	1.43314	0.78055	Q868H8	>sp|Q868H8|PRCMB_TRYCC Proline racemase B OS=Trypanosoma cruzi (strain CL Brener) GN=PA45-B PE=1 SV=1;>sp|Q4DA80|PRCMA_TRYCC Proline racemase A OS=Trypanosoma cruzi (strain CL Brener) GN=PA45-A PE=1 SV=2	2	12	237160000	333880000	432720000	257620000	1.71702	3	3	3	102	102	102	38465	0	57598	1537800000	10	27.5249	27.7513	28.5233	28.3139	Q868H8
+	1.67401	0.775373	Q4DHW4	>tr|Q4DHW4|Q4DHW4_TRYCC Uncharacterized protein OS=Trypanosoma cruzi (strain CL Brener) GN=Tc00.1047053507649.20 PE=4 SV=1;>tr|Q4DPH9|Q4DPH9_TRYCC Uncharacterized protein (Fragment) OS=Trypanosoma cruzi (strain CL Brener) GN=Tc00.1047053510861.14 PE=4 SV=1	3	16	69659000	95329000	123230000	328450000	1.70672	7	7	7	43	43	43	24832	0	20599	674690000	33	26.4623	26.2381	27.1498	27.1013	Q4DHW4
+	1.59546	0.770755	Q4DIB9	>tr|Q4DIB9|Q4DIB9_TRYCC GTP-binding nuclear protein OS=Trypanosoma cruzi (strain CL Brener) GN=Tc00.1047053509455.80 PE=3 SV=1;>tr|Q4CP51|Q4CP51_TRYCC GTP-binding nuclear protein OS=Trypanosoma cruzi (strain CL Brener) GN=Tc00.1047053503539.30 PE=3 SV=1	2	21	316020000	418060000	760420000	1517300000	1.70099	7	7	7	461	461	461	24398	0	39371	3286400000	34	28.4666	28.7046	29.3952	29.3175	Q4DIB9
+	1.83116	0.744126	Q4E0P0	>tr|Q4E0P0|Q4E0P0_TRYCC Protein transport protein sec31, putative OS=Trypanosoma cruzi (strain CL Brener) GN=Tc00.1047053506297.290 PE=4 SV=1	1	20	188820000	271660000	612090000	831800000	1.6768	9	9	9	144	144	144	13207	0	55661	2096000000	36	27.8966	27.9837	28.7646	28.6039	Q4E0P0
+	1.30972	0.743396	Q4DJY1	>tr|Q4DJY1|Q4DJY1_TRYCC Ribosomal protein S19, putative OS=Trypanosoma cruzi (strain CL Brener) GN=Tc00.1047053510879.20 PE=4 SV=1;>tr|Q4D6N9|Q4D6N9_TRYCC Ribosomal protein S19, putative OS=Trypanosoma cruzi (strain CL Brener) GN=Tc00.1047053504013.100 PE=	2	13	531150000	802430000	903740000	1989500000	1.68431	4	4	4	192	192	192	18818	0	13269	4606700000	30	29.0456	29.1337	29.6679	29.9982	Q4DJY1
+	1.25343	0.73947	Q4DE42	>tr|Q4DE42|Q4DE42_TRYCC Dipeptidyl-peptidase, putative OS=Trypanosoma cruzi (strain CL Brener) GN=Tc00.1047053508699.120 PE=4 SV=1;>tr|Q4DBP7|Q4DBP7_TRYCC Dipeptidyl-peptidase, putative (Fragment) OS=Trypanosoma cruzi (strain CL Brener) GN=Tc00.10470535086	2	52	265260000	642420000	827370000	898290000	1.67671	16	7	6	338	151	137	76892	0	40568	2971000000	56	28.4127	28.5884	29.3999	29.0802	Q4DE42
+	1.94023	0.735893	Q4DKI5	>tr|Q4DKI5|Q4DKI5_TRYCC RNA-binding protein RGGm, putative OS=Trypanosoma cruzi (strain CL Brener) GN=Tc00.1047053509105.90 PE=4 SV=1;>tr|Q4CZ27|Q4CZ27_TRYCC RNA-binding protein RGGm, putative OS=Trypanosoma cruzi (strain CL Brener) GN=Tc00.1047053503419.5	2	13	635570000	800430000	879250000	1454600000	1.66313	4	4	4	227	227	227	33409	0	55949	4455000000	34	29.2039	29.0485	29.879	29.8452	Q4DKI5
+	1.13156	0.727394	Q4E3R2	>tr|Q4E3R2|Q4E3R2_TRYCC 60S ribosomal protein L7a, putative OS=Trypanosoma cruzi (strain CL Brener) GN=Tc00.1047053506401.320 PE=4 SV=1	1	24	1912700000	1925800000	3260200000	5702300000	1.64062	8	8	1	197	197	63	34871	0	14472	14269000000	105	31.0366	30.6318	31.5077	31.6154	Q4E3R2
+	1.12433	0.715117	Q4DJX1	>tr|Q4DJX1|Q4DJX1_TRYCC Ribosomal protein L3, putative OS=Trypanosoma cruzi (strain CL Brener) GN=Tc00.1047053510879.110 PE=3 SV=1	2	41	2169700000	2458900000	3631000000	8031300000	1.65818	12	12	12	273	273	273	48539	0	31977	18186000000	127	31.1432	31.0926	31.6267	32.0394	Q4DJX1
+	1.40404	0.70877	Q4DPB9	>tr|Q4DPB9|Q4DPB9_TRYCC Peptidyl-prolyl cis-trans isomerase OS=Trypanosoma cruzi (strain CL Brener) GN=Tc00.1047053508577.140 PE=1 SV=1;>tr|Q4DNC9|Q4DNC9_TRYCC Peptidyl-prolyl cis-trans isomerase OS=Trypanosoma cruzi (strain CL Brener) GN=Tc00.104705350752	2	13	146950000	318400000	150280000	590790000	1.63149	4	4	4	268	268	268	21102	0	14374	1404200000	26	27.5141	27.2752	28.021	28.1858	Q4DPB9
+	2.10202	0.695824	Q4DZ41	>sp|Q4DZ41|RS3A2_TRYCC 40S ribosomal protein S3a-2 OS=Trypanosoma cruzi (strain CL Brener) GN=Tc00.1047053511001.9 PE=3 SV=1;>sp|Q4D2R9|RS3A1_TRYCC 40S ribosomal protein S3a-1 OS=Trypanosoma cruzi (strain CL Brener) GN=Tc00.1047053503635.59 PE=3 SV=1;>tr|Q	6	47	2145400000	2368000000	3918500000	7432800000	1.62127	15	15	15	59	59	59	29854	0	59998	18512000000	85	31.209	31.1942	31.8356	31.9592	Q4DZ41
+	3.87541	0.69536	Q4DD50	>tr|Q4DD50|Q4DD50_TRYCC 60S ribosomal protein L10, putative OS=Trypanosoma cruzi (strain CL Brener) GN=Tc00.1047053510241.50 PE=4 SV=1	1	18	3562500000	4564800000	5255600000	8805100000	1.61929	5	5	5	239	239	239	2476	0	20883	24824000000	72	31.6911	31.7017	32.3978	32.3858	Q4DD50
+	2.43746	0.694805	Q4DLI2	>tr|Q4DLI2|Q4DLI2_TRYCC Ribonuclease L inhibitor, putative OS=Trypanosoma cruzi (strain CL Brener) GN=Tc00.1047053508637.150 PE=4 SV=1;>tr|Q4CKA0|Q4CKA0_TRYCC Ribonuclease L inhibitor, putative (Fragment) OS=Trypanosoma cruzi (strain CL Brener) GN=Tc00.104	2	15	235880000	302550000	325200000	477900000	1.61905	4	4	4	77	77	77	72873	0	27879	1503900000	17	27.534	27.4941	28.1718	28.246	Q4DLI2
+	1.5105	0.694405	Q4E5A3	>tr|Q4E5A3|Q4E5A3_TRYCC Sarcoplasmic reticulum glycoprotein, putative OS=Trypanosoma cruzi (strain CL Brener) GN=Tc00.1047053506559.270 PE=3 SV=1	1	17	75123000	162920000	212730000	304700000	1.62021	5	5	5	99	99	99	625	0	11957	880920000	23	26.6851	26.8298	27.5537	27.35	Q4E5A3
+	1.44613	0.685701	Q4DTP7	>tr|Q4DTP7|Q4DTP7_TRYCC Carboxypeptidase OS=Trypanosoma cruzi (strain CL Brener) GN=Tc00.1047053509695.210 PE=3 SV=1	1	52	3385700000	4474800000	4608000000	7984100000	1.61532	14	14	6	446	446	165	51582	0	1894	26498000000	177	31.6153	31.6301	32.1753	32.4416	Q4DTP7
+	1.15822	0.679311	Q4CXV2	>tr|Q4CXV2|Q4CXV2_TRYCC Uncharacterized protein OS=Trypanosoma cruzi (strain CL Brener) GN=Tc00.1047053506413.70 PE=4 SV=1	1	16	91506000	132580000	279560000	497460000	1.60919	6	6	3	246	246	123	45486	0	86026	1050100000	22	27.1835	27.008	27.6076	27.9425	Q4CXV2
+	1.21818	0.663989	Q4DIR7	>tr|Q4DIR7|Q4DIR7_TRYCC Uncharacterized protein OS=Trypanosoma cruzi (strain CL Brener) GN=Tc00.1047053511661.60 PE=4 SV=1	1	15	268540000	348060000	337890000	601270000	1.59535	4	4	1	269	269	44	25606	0	29265	1584100000	26	27.735	27.7731	28.2479	28.5882	Q4DIR7
+	1.68729	0.663674	Q4D450	>tr|Q4D450|Q4D450_TRYCC Uncharacterized protein OS=Trypanosoma cruzi (strain CL Brener) GN=Tc00.1047053511229.100 PE=3 SV=1	1	13	103010000	177320000	122960000	308890000	1.58321	5	5	1	37	37	66	25831	0	60637	927690000	11	26.6507	26.8038	27.3319	27.45	Q4D450
+	2.39828	0.663361	Q4DYL1	>tr|Q4DYL1|Q4DYL1_TRYCC RNA-binding protein, putative OS=Trypanosoma cruzi (strain CL Brener) GN=Tc00.1047053506211.70 PE=4 SV=1	1	20	210200000	343780000	568320000	989980000	1.5838	8	8	1	468	468	68	31109	0	79237	2371800000	53	28.3051	28.2471	28.909	28.9699	Q4DYL1
+	1.45594	0.659369	Q4CNR6	>tr|Q4CNR6|Q4CNR6_TRYCC ATP synthase, alpha chain, mitochondrial, putative (Fragment) OS=Trypanosoma cruzi (strain CL Brener) GN=Tc00.1047053510395.10 PE=4 SV=1	1	21	774600000	1092500000	724660000	1653800000	1.57577	6	6	6	279	279	279	25857	0	59919	5303200000	37	29.5494	29.323	30.1526	30.0387	Q4CNR6
+	1.97189	0.656515	Q4DG21	>tr|Q4DG21|Q4DG21_TRYCC Cystathionine beta-synthase, putative OS=Trypanosoma cruzi (strain CL Brener) GN=Tc00.1047053508241.140 PE=4 SV=1;>tr|Q4DF37|Q4DF37_TRYCC Cystathionine beta-synthase OS=Trypanosoma cruzi (strain CL Brener) GN=Tc00.1047053508177.120	8	64	3987500000	5857100000	7248300000	11859000000	1.57685	19	19	1	51	51	49	4205	0	22301	33078000000	183	32.0753	32.1545	32.7157	32.8271	Q4DG21
+	1.81399	0.650405	Q4DTY0	>tr|Q4DTY0|Q4DTY0_TRYCC Cytochrome c oxidase VII, putative OS=Trypanosoma cruzi (strain CL Brener) GN=Tc00.1047053509233.150 PE=4 SV=1;>tr|Q4CXC3|Q4CXC3_TRYCC Cytochrome c oxidase VII, putative OS=Trypanosoma cruzi (strain CL Brener) GN=Tc00.1047053503769.	2	23	362940000	645090000	666680000	1361300000	1.57069	6	6	6	412	412	412	19065	0	28041	3690700000	41	28.8699	28.783	29.4079	29.5458	Q4DTY0
+	2.16505	0.646332	Q4D832	>tr|Q4D832|Q4D832_TRYCC Heat shock protein DnaJ, putative OS=Trypanosoma cruzi (strain CL Brener) GN=Tc00.1047053511627.110 PE=3 SV=1	1	59	1390300000	1603300000	2514400000	4387400000	1.56418	19	19	19	504	504	504	44204	0	23238	11783000000	132	30.5499	30.4444	31.1536	31.1334	Q4D832
+	1.15442	0.645706	Q4DLP7	>tr|Q4DLP7|Q4DLP7_TRYCC NADH-cytochrome b5 reductase OS=Trypanosoma cruzi (strain CL Brener) GN=Tc00.1047053511859.170 PE=3 SV=1;>tr|Q4D0C0|Q4D0C0_TRYCC NADH-cytochrome b5 reductase OS=Trypanosoma cruzi (strain CL Brener) GN=Tc00.1047053511047.40 PE=3 SV=1	2	18	341160000	345970000	884660000	1181600000	1.56345	6	6	6	242	242	242	34632	0	17761	3099500000	37	28.7343	28.4682	29.1249	29.369	Q4DLP7
+	1.89895	0.64065	Q4DAV5	>tr|Q4DAV5|Q4DAV5_TRYCC Centromere/microtubule binding protein cbf5, putative OS=Trypanosoma cruzi (strain CL Brener) GN=Tc00.1047053504069.90 PE=4 SV=1;>tr|Q4D1G9|Q4D1G9_TRYCC Centromere/microtubule binding protein cbf5, putative OS=Trypanosoma cruzi (str	2	20	263040000	374560000	572870000	749000000	1.55936	7	7	7	29	29	29	48605	0	49937	2148000000	34	28.1187	28.025	28.6569	28.768	Q4DAV5
+	1.96314	0.640187	Q4D6H7	>tr|Q4D6H7|Q4D6H7_TRYCC Ribosomal protein S20, putative OS=Trypanosoma cruzi (strain CL Brener) GN=Tc00.1047053508475.10 PE=3 SV=1	1	15	958030000	1113400000	1290200000	2340000000	1.55925	4	4	4	239	239	239	13226	0	56489	6718500000	52	29.8159	29.7438	30.3632	30.4769	Q4D6H7
+	1.20457	0.632227	Q4DNH8	>tr|Q4DNH8|Q4DNH8_TRYCC Uncharacterized protein (Fragment) OS=Trypanosoma cruzi (strain CL Brener) GN=Tc00.1047053509791.189 PE=4 SV=1	1	25	323790000	332460000	338150000	608830000	1.55408	7	1	1	413	141	141	23032	0	10933	2393900000	31	27.5928	27.7739	28.1766	28.4545	Q4DNH8
+	1.56171	0.629084	Q4CM25	>tr|Q4CM25|Q4CM25_TRYCC NADH-cytochrome b5 reductase OS=Trypanosoma cruzi (strain CL Brener) GN=Tc00.1047053503873.10 PE=3 SV=1	1	15	260280000	523690000	377600000	808560000	1.54447	5	5	1	192	192	36	3442	0	27324	2329900000	26	28.0721	28.2567	28.7405	28.8465	Q4CM25
+	2.14873	0.614426	Q4DD17	>tr|Q4DD17|Q4DD17_TRYCC Aminopeptidase, putative OS=Trypanosoma cruzi (strain CL Brener) GN=Tc00.1047053511289.30 PE=4 SV=1	1	24	542630000	682620000	1027300000	1513100000	1.53164	7	7	2	281	281	76	42501	0	15504	4254600000	39	29.1582	29.1177	29.8003	29.7045	Q4DD17
+	1.27983	0.605759	Q4DJ00	>tr|Q4DJ00|Q4DJ00_TRYCC Uncharacterized protein OS=Trypanosoma cruzi (strain CL Brener) GN=Tc00.1047053511287.110 PE=4 SV=1;>tr|Q4CUH2|Q4CUH2_TRYCC Uncharacterized protein OS=Trypanosoma cruzi (strain CL Brener) GN=Tc00.1047053503833.50 PE=4 SV=1	2	18	397970000	406760000	346800000	818400000	1.52544	6	6	6	231	231	231	37656	0	10173	2626700000	37	27.8741	28.0216	28.6779	28.4293	Q4DJ00
+	1.72529	0.605256	Q4D1P4	>tr|Q4D1P4|Q4D1P4_TRYCC Uncharacterized protein OS=Trypanosoma cruzi (strain CL Brener) GN=Tc00.1047053510397.10 PE=4 SV=1	1	17	339770000	370070000	625220000	1056000000	1.52105	5	5	1	302	302	109	22032	0	3112	2578500000	54	28.3626	28.239	28.8488	28.9633	Q4D1P4
+	2.34355	0.602791	Q4D7V3	>tr|Q4D7V3|Q4D7V3_TRYCC Lysine--tRNA ligase OS=Trypanosoma cruzi (strain CL Brener) GN=Tc00.1047053508971.30 PE=3 SV=1	1	40	475880000	689740000	1090700000	1691000000	1.51821	15	15	15	381	381	381	65922	0	58995	4358500000	87	29.1563	29.2321	29.7821	29.8118	Q4D7V3
+	1.16779	0.591288	Q4E0N6	>tr|Q4E0N6|Q4E0N6_TRYCC 40S ribosomal protein S15a, putative OS=Trypanosoma cruzi (strain CL Brener) GN=Tc00.1047053506297.330 PE=3 SV=1	1	19	1455800000	1559000000	1629300000	2151900000	1.50337	5	5	2	40	40	162	1466	0	1273	8454800000	90	30.1672	29.9014	30.532	30.7191	Q4E0N6
+	1.7355	0.588976	Q4CTR5	>tr|Q4CTR5|Q4CTR5_TRYCC 40S ribosomal protein L14, putative OS=Trypanosoma cruzi (strain CL Brener) GN=Tc00.1047053506861.30 PE=4 SV=1;>tr|Q4DQ35|Q4DQ35_TRYCC 40S ribosomal protein L14, putative OS=Trypanosoma cruzi (strain CL Brener) GN=Tc00.1047053511825	2	22	686330000	957990000	1368100000	1821700000	1.50182	6	6	6	222	222	222	2073	0	54149	5662800000	40	29.368	29.5299	30.041	30.0349	Q4CTR5
+	1.84669	0.588378	Q4DDK1	>tr|Q4DDK1|Q4DDK1_TRYCC Uncharacterized protein OS=Trypanosoma cruzi (strain CL Brener) GN=Tc00.1047053509267.40 PE=4 SV=1;>tr|Q4CR84|Q4CR84_TRYCC Uncharacterized protein (Fragment) OS=Trypanosoma cruzi (strain CL Brener) GN=Tc00.1047053507967.30 PE=4 SV=1	2	17	418250000	479180000	612440000	1036000000	1.5026	5	5	5	399	399	399	22439	0	62155	2896700000	28	28.6957	28.5718	29.1875	29.2567	Q4DDK1
+	1.73821	0.575554	Q4DM81	>tr|Q4DM81|Q4DM81_TRYCC Uncharacterized protein OS=Trypanosoma cruzi (strain CL Brener) GN=Tc00.1047053511301.120 PE=3 SV=1;>tr|Q4CZ68|Q4CZ68_TRYCC Uncharacterized protein (Fragment) OS=Trypanosoma cruzi (strain CL Brener) GN=Tc00.1047053507213.10 PE=3 SV=	3	17	79936000	119140000	132710000	289670000	1.48809	6	6	6	116	116	116	63016	0	4277	770440000	23	26.5578	26.7144	27.2018	27.2215	Q4DM81
+	1.69437	0.560376	Q4DGZ5	>tr|Q4DGZ5|Q4DGZ5_TRYCC 40S ribosomal protein S15, putative OS=Trypanosoma cruzi (strain CL Brener) GN=Tc00.1047053511809.130 PE=3 SV=1	1	14	1530500000	2448100000	2623500000	4658100000	1.47365	4	4	4	336	336	336	17517	0	13058	12814000000	44	30.6911	30.8281	31.2769	31.3631	Q4DGZ5
+	1.18098	0.555037	Q4E162	>sp|Q4E162|IF4A_TRYCC Probable eukaryotic initiation factor 4A OS=Trypanosoma cruzi (strain CL Brener) GN=Tc00.1047053511585.190 PE=3 SV=1;>tr|Q4E0F6|Q4E0F6_TRYCC Eukaryotic initiation factor 4a, putative OS=Trypanosoma cruzi (strain CL Brener) GN=Tc00.104	2	41	1674100000	2733700000	2934100000	4629200000	1.46405	14	14	14	433	433	433	45503	0	84394	13194000000	190	30.5107	30.7834	31.2647	31.1395	Q4E162
+	1.2214	0.550479	Q4DV84	>tr|Q4DV84|Q4DV84_TRYCC Mercaptopyruvate sulfurtransferase, putative OS=Trypanosoma cruzi (strain CL Brener) GN=Tc00.1047053508173.40 PE=4 SV=1	1	19	445320000	682670000	841130000	1462100000	1.46235	6	6	6	235	235	235	42424	0	17063	4016000000	27	28.8701	29.0995	29.4527	29.618	Q4DV84
+	1.59701	0.548823	Q4DDC9	>tr|Q4DDC9|Q4DDC9_TRYCC Uncharacterized protein OS=Trypanosoma cruzi (strain CL Brener) GN=Tc00.1047053507485.110 PE=4 SV=1	1	16	52725000	106690000	193900000	225900000	1.46141	6	6	3	15	15	89	60752	0	25794	684180000	27	26.2258	26.3815	26.8094	26.8955	Q4DDC9
+	1.4043	0.530858	Q4D6P0	>tr|Q4D6P0|Q4D6P0_TRYCC Uncharacterized protein OS=Trypanosoma cruzi (strain CL Brener) GN=Tc00.1047053504013.90 PE=4 SV=1	1	17	118460000	165650000	181570000	497020000	1.44101	7	7	2	159	159	4	65796	0	30298	1154500000	31	27.3663	27.1532	27.7694	27.8117	Q4D6P0
+	1.48682	0.530554	Q4DEL1	>tr|Q4DEL1|Q4DEL1_TRYCC Histone H4 OS=Trypanosoma cruzi (strain CL Brener) GN=Tc00.1047053507941.150 PE=3 SV=1	1	22	18434000000	23387000000	18079000000	28286000000	1.44118	6	6	2	42	42	11	1117	0	48827	112090000000	110	33.711	33.9069	34.3324	34.3466	Q4DEL1
+	1.32974	0.524963	Q4CSE1	>tr|Q4CSE1|Q4CSE1_TRYCC Eukaryotic translation initiation factor 5, putative OS=Trypanosoma cruzi (strain CL Brener) GN=Tc00.1047053504119.10 PE=4 SV=1	1	45	728000000	1137000000	1106500000	2018500000	1.43929	15	15	2	48	48	95	42881	0	1993	5751200000	73	29.627	29.4675	29.9856	30.1588	Q4CSE1
+	1.24659	0.522657	Q4DAG5	>tr|Q4DAG5|Q4DAG5_TRYCC Deoxyribose-phosphate aldolase, putative OS=Trypanosoma cruzi (strain CL Brener) GN=Tc00.1047053507559.80 PE=3 SV=1;>tr|Q4DZ14|Q4DZ14_TRYCC Deoxyribose-phosphate aldolase, putative OS=Trypanosoma cruzi (strain CL Brener) GN=Tc00.104	2	39	1023900000	1490700000	1564400000	1883800000	1.44189	10	10	10	562	562	562	29351	0	93511	8196200000	90	29.8466	29.9028	30.5243	30.2704	Q4DAG5
+	2.22548	0.521277	Q4DQB5	>tr|Q4DQB5|Q4DQB5_TRYCC CCR4 associated factor, putative OS=Trypanosoma cruzi (strain CL Brener) GN=Tc00.1047053511827.60 PE=4 SV=1	1	23	515100000	1016400000	1062500000	1332400000	1.4347	8	8	2	304	304	92	46389	0	6977	4466500000	62	29.1936	29.2732	29.7478	29.7615	Q4DQB5
+	1.71047	0.519612	Q4DYW3	>tr|Q4DYW3|Q4DYW3_TRYCC Retrotransposon hot spot (RHS) protein, putative OS=Trypanosoma cruzi (strain CL Brener) GN=Tc00.1047053507167.70 PE=4 SV=1	1	13	156830000	199840000	247780000	433490000	1.43533	4	2	1	48	25	14	10479	0	49993	1145300000	28	27.3896	27.3642	27.824	27.969	Q4DYW3
+	1.40781	0.518656	Q4D1B8	>tr|Q4D1B8|Q4D1B8_TRYCC Tryparedoxin, putative OS=Trypanosoma cruzi (strain CL Brener) GN=Tc00.1047053509997.30 PE=4 SV=1	1	22	3425500000	2429000000	4019000000	5858100000	1.42886	6	6	6	521	521	521	16037	0	39675	18775000000	38	31.4501	31.2397	31.8531	31.874	Q4D1B8
+	1.22932	0.518327	Q4DQY7	>tr|Q4DQY7|Q4DQY7_TRYCC Acetyl-coenzyme A synthetase OS=Trypanosoma cruzi (strain CL Brener) GN=Tc00.1047053509331.30 PE=3 SV=1	1	57	1123200000	1959900000	2524500000	4361500000	1.43305	18	18	1	334	334	43	75191	0	17709	11989000000	115	30.5786	30.7528	31.0851	31.2829	Q4DQY7
+	2.37159	0.513875	Q9GT49	>sp|Q9GT49|TRYS_TRYCC Trypanothione synthetase OS=Trypanosoma cruzi (strain CL Brener) GN=TRS PE=1 SV=1	1	66	1508600000	1969900000	2422300000	4433000000	1.42751	20	20	20	408	408	408	73457	0	13722	11822000000	161	30.6264	30.693	31.1693	31.1778	Q9GT49
+	2.82878	0.51189	Q4DW89	>tr|Q4DW89|Q4DW89_TRYCC Lipophosphoglycan biosynthetic protein, putative OS=Trypanosoma cruzi (strain CL Brener) GN=Tc00.1047053506989.190 PE=3 SV=1	3	56	932980000	1258700000	1911900000	3122800000	1.42605	19	19	19	32	32	32	87021	0	80278	8190500000	100	29.9067	29.9035	30.4367	30.3973	Q4DW89
+	2.29655	0.509088	Q4CNI8	>tr|Q4CNI8|Q4CNI8_TRYCC Uncharacterized protein OS=Trypanosoma cruzi (strain CL Brener) GN=Tc00.1047053509139.10 PE=4 SV=1	1	31	1873300000	2781200000	3275100000	5986600000	1.4236	9	9	2	23	23	38	56356	0	1363	14992000000	95	31.1191	31.1174	31.6636	31.591	Q4CNI8
+	1.69754	0.508374	Q4DDX0	>tr|Q4DDX0|Q4DDX0_TRYCC Uncharacterized protein OS=Trypanosoma cruzi (strain CL Brener) GN=Tc00.1047053509011.60 PE=4 SV=1	1	41	519590000	407800000	1248100000	1753800000	1.42106	13	13	5	348	348	136	65523	0	73725	4675400000	118	29.3202	29.1832	29.7856	29.7346	Q4DDX0
+	1.8386	0.500401	Q4CZR2	>tr|Q4CZR2|Q4CZR2_TRYCC Splicing factor TSR1, putative OS=Trypanosoma cruzi (strain CL Brener) GN=Tc00.1047053503715.10 PE=4 SV=1;>tr|Q4DDU0|Q4DDU0_TRYCC Splicing factor TSR1, putative OS=Trypanosoma cruzi (strain CL Brener) GN=Tc00.1047053509607.30 PE=4 S	2	25	491410000	685230000	782590000	1473600000	1.41371	7	7	7	271	271	271	34666	0	47445	3854900000	64	28.9859	28.8731	29.4068	29.453	Q4CZR2
+	1.79891	0.498055	Q4CSC4	>tr|Q4CSC4|Q4CSC4_TRYCC S-adenosylmethionine synthase OS=Trypanosoma cruzi (strain CL Brener) GN=Tc00.1047053506945.160 PE=3 SV=1	1	35	2113400000	2456100000	2618300000	4078800000	1.41159	9	9	9	241	241	241	43494	0	66356	13370000000	99	30.9686	30.8576	31.3803	31.4421	Q4CSC4
+	1.59357	0.492926	Q4E2S6	>tr|Q4E2S6|Q4E2S6_TRYCC Phosphoglycerate kinase OS=Trypanosoma cruzi (strain CL Brener) GN=Tc00.1047053504153.20 PE=3 SV=1	1	11	123710000	190500000	247680000	329000000	1.40843	3	3	3	45	45	45	99537	0	57102	1117500000	15	27.1621	27.0834	27.5458	27.6856	Q4E2S6
+	1.85644	0.492875	Q4DIZ9	>tr|Q4DIZ9|Q4DIZ9_TRYCC 40S ribosomal protein S2, putative OS=Trypanosoma cruzi (strain CL Brener) GN=Tc00.1047053503833.40 PE=3 SV=1	1	41	3267300000	4317000000	4560600000	7433800000	1.40783	14	14	14	494	494	494	28532	0	16873	23767000000	95	31.6072	31.5486	32.1217	32.0199	Q4DIZ9
+	1.80987	0.490837	Q4DIV9	>tr|Q4DIV9|Q4DIV9_TRYCC 60S ribosomal protein L6, putative OS=Trypanosoma cruzi (strain CL Brener) GN=Tc00.1047053507709.50 PE=1 SV=1	1	19	1235100000	1747300000	1808600000	3177900000	1.40468	7	7	0	228	228	0	21399	0	11993	9282200000	30	30.1568	30.2621	30.7326	30.668	Q4DIV9
+	1.73915	0.469421	Q4CU61	>tr|Q4CU61|Q4CU61_TRYCC 60S ribosomal protein L5, putative OS=Trypanosoma cruzi (strain CL Brener) GN=Tc00.1047053509671.80 PE=1 SV=1;>tr|Q4CU60|Q4CU60_TRYCC 60S ribosomal protein L5, putative OS=Trypanosoma cruzi (strain CL Brener) GN=Tc00.1047053510765.7	2	52	2077600000	2928000000	4964000000	7833200000	1.38576	14	14	14	314	314	314	34852	0	78814	19558000000	85	31.3107	31.3425	31.7338	31.8583	Q4CU61
+	1.51578	0.465591	Q4D7R4	>tr|Q4D7R4|Q4D7R4_TRYCC Glutathione synthetase OS=Trypanosoma cruzi (strain CL Brener) GN=Tc00.1047053508865.10 PE=3 SV=1;>tr|Q4D526|Q4D526_TRYCC Glutathione synthetase OS=Trypanosoma cruzi (strain CL Brener) GN=Tc00.1047053506659.30 PE=3 SV=1	2	24	160850000	184130000	275560000	627420000	1.37968	9	9	9	312	312	312	58624	0	39968	1457900000	41	27.6479	27.5026	28.0815	28.0003	Q4D7R4
+	1.35572	0.456289	Q4E030	>tr|Q4E030|Q4E030_TRYCC Translation initiation factor, putative OS=Trypanosoma cruzi (strain CL Brener) GN=Tc00.1047053507063.20 PE=4 SV=1	1	12	122320000	166740000	187460000	381460000	1.37026	3	3	2	87	87	67	38206	0	55291	962790000	38	26.9507	26.7768	27.2725	27.3676	Q4E030
+	2.02902	0.44903	Q4CX49	>tr|Q4CX49|Q4CX49_TRYCC Uncharacterized protein OS=Trypanosoma cruzi (strain CL Brener) GN=Tc00.1047053504203.40 PE=4 SV=1;>tr|Q4CS80|Q4CS80_TRYCC Uncharacterized protein OS=Trypanosoma cruzi (strain CL Brener) GN=Tc00.1047053503791.30 PE=4 SV=1	2	16	503540000	728130000	780820000	1469800000	1.36457	5	5	5	353	353	353	26012	0	33928	4134300000	62	28.9724	29.0571	29.4747	29.4528	Q4CX49
+	2.14764	0.444374	Q4DJ45	>tr|Q4DJ45|Q4DJ45_TRYCC Uncharacterized protein (Fragment) OS=Trypanosoma cruzi (strain CL Brener) GN=Tc00.1047053511755.119 PE=4 SV=1	1	47	892960000	1196000000	1306700000	2184400000	1.36098	13	13	3	355	355	7	61155	0	23048	6379000000	124	29.7416	29.7775	30.1708	30.2371	Q4DJ45
+	1.70809	0.421428	Q4CVH4	>tr|Q4CVH4|Q4CVH4_TRYCC Glutamate dehydrogenase, putative (Fragment) OS=Trypanosoma cruzi (strain CL Brener) GN=Tc00.1047053505843.10 PE=4 SV=1	1	26	2251800000	1838700000	1562700000	3555300000	1.33864	9	9	9	464	464	464	24121	0	24729	11867000000	31	30.6244	30.7292	31.1273	31.0692	Q4CVH4
+	2.52818	0.418954	Q4E4N4	>tr|Q4E4N4|Q4E4N4_TRYCC Eukaryotic translation initiation factor 5A OS=Trypanosoma cruzi (strain CL Brener) GN=Tc00.1047053506925.120 PE=3 SV=1	1	27	3678200000	4973100000	5005000000	9675300000	1.33698	9	9	9	545	545	545	18015	0	17792	28007000000	100	31.9083	31.8778	32.295	32.3291	Q4E4N4
+	1.41517	0.395914	Q4E4V0	>tr|Q4E4V0|Q4E4V0_TRYCC Polyadenylate-binding protein OS=Trypanosoma cruzi (strain CL Brener) GN=Tc00.1047053508461.140 PE=3 SV=1	1	64	3972000000	5477500000	6109800000	11398000000	1.31543	20	20	20	438	438	438	6141	0	16021	31644000000	168	32.1564	32.0341	32.4396	32.5427	Q4E4V0
+	2.43632	0.394863	Q4CXP6	>tr|Q4CXP6|Q4CXP6_TRYCC Uncharacterized protein OS=Trypanosoma cruzi (strain CL Brener) GN=Tc00.1047053508643.20 PE=4 SV=1	1	14	186410000	298440000	331810000	725060000	1.31491	4	4	2	162	162	68	53279	0	83206	1729200000	50	27.8524	27.8757	28.2798	28.238	Q4CXP6
+	1.53622	0.394399	Q7Z1V1	>sp|Q7Z1V1|CP51_TRYCC Sterol 14-alpha demethylase OS=Trypanosoma cruzi (strain CL Brener) GN=CYP51 PE=1 SV=1	1	45	1342200000	1797500000	2165300000	3879400000	1.3129	13	13	13	353	353	353	54682	0	23681	10113000000	108	30.5047	30.6423	30.9669	30.9689	Q7Z1V1
+	2.25966	0.388322	Q4E2P8	>tr|Q4E2P8|Q4E2P8_TRYCC Succinyl-CoA:3-ketoacid-coenzyme A transferase OS=Trypanosoma cruzi (strain CL Brener) GN=Tc00.1047053504153.360 PE=3 SV=1	1	24	2467400000	2298700000	2854600000	4807100000	1.30885	6	6	1	169	169	29	52797	0	74984	14632000000	73	31.0563	31.0136	31.4428	31.4038	Q4E2P8
+	1.6285	0.388315	Q4DSI2	>tr|Q4DSI2|Q4DSI2_TRYCC Retrotransposon hot spot (RHS) protein, putative OS=Trypanosoma cruzi (strain CL Brener) GN=Tc00.1047053503861.10 PE=4 SV=1	2	45	483130000	622690000	688330000	1128800000	1.3085	14	8	5	205	131	9	10772	0	70936	3290700000	58	28.8436	28.9418	29.2454	29.3165	Q4DSI2
+	1.5098	0.387148	Q4CYG8	>tr|Q4CYG8|Q4CYG8_TRYCC Uncharacterized protein OS=Trypanosoma cruzi (strain CL Brener) GN=Tc00.1047053510817.60 PE=4 SV=1	1	29	424930000	499930000	649000000	1128400000	1.30635	9	9	9	406	406	406	37681	0	38435	3214700000	75	28.6448	28.7826	29.1112	29.0905	Q4CYG8
+	1.49032	0.374962	Q4DXG9	>tr|Q4DXG9|Q4DXG9_TRYCC Heat shock 70 kDa protein, mitochondrial, putative (Fragment) OS=Trypanosoma cruzi (strain CL Brener) GN=Tc00.1047053506941.280 PE=4 SV=1	1	56	498470000	654440000	442400000	874630000	1.29535	15	4	4	643	25	25	18536	0	20702	3207400000	51	28.7826	28.9201	29.2333	29.2193	Q4DXG9
+	2.06959	0.354795	Q4DK90	>tr|Q4DK90|Q4DK90_TRYCC Proteasome regulatory non-ATPase subunit, putative OS=Trypanosoma cruzi (strain CL Brener) GN=Tc00.1047053509611.160 PE=4 SV=1	1	13	218120000	286040000	226370000	554060000	1.27901	5	5	1	251	251	61	37163	0	10272	1698500000	37	27.7782	27.7499	28.0891	28.1486	Q4DK90
+	1.87679	0.315097	Q4D6N0	>tr|Q4D6N0|Q4D6N0_TRYCC T-complex protein 1, beta subunit, putative OS=Trypanosoma cruzi (strain CL Brener) GN=Tc00.1047053508357.90 PE=3 SV=1	2	42	3287200000	5720500000	4697400000	6966500000	1.24438	14	14	14	346	346	346	5809	0	24934	25344000000	167	31.8752	31.9038	32.2384	32.1708	Q4D6N0
+	3.53462	-0.233717	Q4DFA9	>tr|Q4DFA9|Q4DFA9_TRYCC Uncharacterized protein OS=Trypanosoma cruzi (strain CL Brener) GN=Tc00.1047053508209.110 PE=4 SV=1	1	40	1278200000	1753200000	1061200000	1830000000	0.850443	11	11	3	44	44	101	40007	0	17495	7463300000	90	30.2653	30.269	30.037	30.0299	Q4DFA9
+	2.36879	-0.283816	Q4CY99	>tr|Q4CY99|Q4CY99_TRYCC Uncharacterized protein OS=Trypanosoma cruzi (strain CL Brener) GN=Tc00.1047053509627.40 PE=4 SV=1	1	16	372040000	387660000	303570000	568700000	0.821352	4	4	4	281	281	281	15736	0	15668	2053900000	29	28.3675	28.404	28.1055	28.0984	Q4CY99
+	2.07759	-0.325025	Q4DXC0	>tr|Q4DXC0|Q4DXC0_TRYCC Proteasome regulatory non-ATPase subunit 2, putative OS=Trypanosoma cruzi (strain CL Brener) GN=Tc00.1047053510901.150 PE=4 SV=1	1	50	1156500000	1613000000	948710000	1609200000	0.798381	16	16	16	254	254	254	10569	0	18385	7172300000	139	30.1402	30.1683	29.8028	29.8556	Q4DXC0
+	2.31537	-0.325162	Q4E4T1	>tr|Q4E4T1|Q4E4T1_TRYCC Uncharacterized protein OS=Trypanosoma cruzi (strain CL Brener) GN=Tc00.1047053508461.290 PE=4 SV=1	1	7	221910000	311470000	200940000	312440000	0.798239	2	2	2	49	49	49	61081	0	55702	1370300000	21	27.8127	27.8394	27.4825	27.5192	Q4E4T1
+	1.67833	-0.326158	Q4CV35	>tr|Q4CV35|Q4CV35_TRYCC Flagellar protofilament ribbon protein, putative OS=Trypanosoma cruzi (strain CL Brener) GN=Tc00.1047053503689.30 PE=4 SV=1;>tr|Q4CUF2|Q4CUF2_TRYCC Flagellar protofilament ribbon protein, putative OS=Trypanosoma cruzi (strain CL Bre	2	14	168980000	293870000	84621000	193520000	0.797887	4	4	4	138	138	138	46263	0	81253	1029300000	19	27.3553	27.3082	26.9638	27.0474	Q4CV35
+	2.05471	-0.329491	Q4CX87	>tr|Q4CX87|Q4CX87_TRYCC Tryparedoxin peroxidase, putative OS=Trypanosoma cruzi (strain CL Brener) GN=Tc00.1047053509499.14 PE=4 SV=1	1	48	5499700000	7361000000	4772100000	8319200000	0.795654	13	13	11	597	597	513	25506	0	65319	33501000000	151	32.4192	32.3588	32.0671	32.0519	Q4CX87
+	1.56501	-0.353292	Q4DW59	>tr|Q4DW59|Q4DW59_TRYCC Uncharacterized protein OS=Trypanosoma cruzi (strain CL Brener) GN=Tc00.1047053508231.170 PE=4 SV=1	2	40	1201000000	1613700000	802170000	1586800000	0.782313	11	11	2	253	253	59	59879	0	161	6781500000	126	30.2469	30.1364	29.8604	29.8163	Q4DW59
+	2.14394	-0.361174	Q4DPG9	>tr|Q4DPG9|Q4DPG9_TRYCC Serine/threonine protein kinase, putative OS=Trypanosoma cruzi (strain CL Brener) GN=Tc00.1047053510861.140 PE=3 SV=1;>tr|Q4DDT6|Q4DDT6_TRYCC Serine/threonine protein kinase, putative OS=Trypanosoma cruzi (strain CL Brener) GN=Tc00.	2	30	707970000	827440000	793830000	1031600000	0.778387	9	9	9	364	364	364	3389	0	2348	4406000000	37	29.5701	29.5115	29.1703	29.189	Q4DPG9
+	1.61884	-0.364635	Q4DXJ7	>tr|Q4DXJ7|Q4DXJ7_TRYCC Uncharacterized protein OS=Trypanosoma cruzi (strain CL Brener) GN=Tc00.1047053506195.290 PE=4 SV=1	1	30	1281800000	1927300000	1296000000	1498600000	0.776367	9	9	2	243	243	68	48371	0	11608	9708800000	72	30.5044	30.4052	30.1194	30.0608	Q4DXJ7
+	1.59414	-0.378021	Q4DWB5	>tr|Q4DWB5|Q4DWB5_TRYCC Transitional endoplasmic reticulum ATPase, putative OS=Trypanosoma cruzi (strain CL Brener) GN=Tc00.1047053509733.170 PE=4 SV=1	1	128	9439100000	13534000000	9423200000	12988000000	0.769773	38	38	38	527	527	527	86109	0	32331	59058000000	438	33.3268	33.2595	32.9666	32.8637	Q4DWB5
+	1.53078	-0.378821	Q4CVE1	>tr|Q4CVE1|Q4CVE1_TRYCC Uncharacterized protein OS=Trypanosoma cruzi (strain CL Brener) GN=Tc00.1047053507933.10 PE=4 SV=1	1	37	513460000	670260000	458380000	571650000	0.769598	12	12	7	156	156	81	26042	0	52333	2846700000	75	28.9259	28.8704	28.5798	28.4589	Q4CVE1
+	1.46498	-0.378902	Q4D634	>tr|Q4D634|Q4D634_TRYCC Paraflagellar rod protein 3, putative OS=Trypanosoma cruzi (strain CL Brener) GN=Tc00.1047053509617.20 PE=4 SV=1	1	91	4182400000	5937600000	3732700000	4554300000	0.769343	26	26	26	46	46	46	68662	0	27238	25166000000	274	32.0372	31.9541	31.6756	31.5579	Q4D634
+	1.99904	-0.388813	Q4CZF5	>tr|Q4CZF5|Q4CZF5_TRYCC Profilin OS=Trypanosoma cruzi (strain CL Brener) GN=Tc00.1047053510911.10 PE=3 SV=1;>tr|Q4CMM4|Q4CMM4_TRYCC Profilin OS=Trypanosoma cruzi (strain CL Brener) GN=Tc00.1047053458759.10 PE=3 SV=1	2	10	1131400000	1294300000	539190000	1505900000	0.763618	3	3	3	207	207	207	16095	0	29576	5781700000	36	29.8718	29.804	29.4689	29.4294	Q4CZF5
+	1.88626	-0.39327	Q4D4Y8	>tr|Q4D4Y8|Q4D4Y8_TRYCC Uncharacterized protein (Fragment) OS=Trypanosoma cruzi (strain CL Brener) GN=Tc00.1047053508533.10 PE=4 SV=1	1	74	1237600000	1936000000	1226700000	1925000000	0.761774	24	24	13	169	169	7	3159	0	90371	7836400000	148	30.4057	30.4103	29.9695	30.06	Q4D4Y8
+	3.15982	-0.396389	Q4CWA5	>tr|Q4CWA5|Q4CWA5_TRYCC Arginine kinase, putative OS=Trypanosoma cruzi (strain CL Brener) GN=Tc00.1047053507241.30 PE=3 SV=1;>tr|Q4CRC5|Q4CRC5_TRYCC Arginine kinase (Fragment) OS=Trypanosoma cruzi (strain CL Brener) GN=Tc00.1047053482369.29 PE=3 SV=1	2	90	15058000000	21943000000	10621000000	21693000000	0.759765	25	25	25	591	591	591	40197	0	28355	90174000000	252	33.7929	33.7814	33.3994	33.382	Q4CWA5
+	1.60915	-0.398907	Q4DCA9	>tr|Q4DCA9|Q4DCA9_TRYCC Mitochondrial RNA binding protein, putative OS=Trypanosoma cruzi (strain CL Brener) GN=Tc00.1047053506933.60 PE=4 SV=1	1	11	2217800000	2792200000	1622900000	2909100000	0.757806	5	5	5	303	303	303	14919	0	20189	12630000000	26	31.1716	31.0491	30.6938	30.7291	Q4DCA9
+	1.657	-0.399615	Q4CTS2	>tr|Q4CTS2|Q4CTS2_TRYCC Dispersed gene family protein 1 (DGF-1), putative (Fragment) OS=Trypanosoma cruzi (strain CL Brener) GN=Tc00.1047053506549.9 PE=4 SV=1;>tr|Q4CT27|Q4CT27_TRYCC Dispersed gene family protein 1 (DGF-1), putative (Fragment) OS=Trypanoso	4	23	295790000	395260000	378650000	500240000	0.757429	8	8	2	47	47	15	26072	0	17344	1829300000	31	28.491	28.3717	28.0226	28.0408	Q4CTS2
+	1.62924	-0.401337	Q4D609	>tr|Q4D609|Q4D609_TRYCC Cytoskeleton-associated protein CAP5.5, putative OS=Trypanosoma cruzi (strain CL Brener) GN=Tc00.1047053508555.60 PE=3 SV=1	1	131	6856200000	9599900000	4812900000	7821500000	0.757466	37	37	4	61	61	74	89807	0	32331	37691000000	417	32.6492	32.7157	32.3342	32.2281	Q4D609
+	1.85378	-0.420231	Q4E4E9	>tr|Q4E4E9|Q4E4E9_TRYCC Tyrosine aminotransferase, putative OS=Trypanosoma cruzi (strain CL Brener) GN=Tc00.1047053510187.20 PE=4 SV=1	2	35	2367900000	3345300000	1872000000	3344500000	0.747637	11	11	10	355	355	314	46146	0	22462	13771000000	132	31.2114	31.2481	30.8563	30.7627	Q4E4E9
+	1.63617	-0.423429	Q4CW02	>tr|Q4CW02|Q4CW02_TRYCC Calpain-like cysteine peptidase, putative (Fragment) OS=Trypanosoma cruzi (strain CL Brener) GN=Tc00.1047053509013.10 PE=3 SV=1	1	84	777110000	1001400000	494820000	911220000	0.746273	26	12	10	295	142	122	15466	0	15297	3883700000	82	29.4839	29.4435	29.1026	28.978	Q4CW02
+	1.64262	-0.425594	Q4D0V0	>tr|Q4D0V0|Q4D0V0_TRYCC Uncharacterized protein OS=Trypanosoma cruzi (strain CL Brener) GN=Tc00.1047053508319.30 PE=4 SV=1;>tr|Q4CNH6|Q4CNH6_TRYCC Uncharacterized protein (Fragment) OS=Trypanosoma cruzi (strain CL Brener) GN=Tc00.1047053508785.4 PE=4 SV=1	2	54	2191200000	2965100000	1478200000	2795200000	0.744677	16	16	11	375	375	301	47023	0	55416	12724000000	136	31.0528	30.9696	30.636	30.5352	Q4D0V0
+	1.47401	-0.428799	Q4DGZ9	>tr|Q4DGZ9|Q4DGZ9_TRYCC Uncharacterized protein OS=Trypanosoma cruzi (strain CL Brener) GN=Tc00.1047053511809.90 PE=4 SV=1	1	22	823760000	1217100000	569590000	1025600000	0.741766	6	6	6	302	302	302	12186	0	11814	4775900000	67	29.6244	29.7841	29.2866	29.2643	Q4DGZ9
+	2.55968	-0.429708	Q4CLW3	>tr|Q4CLW3|Q4CLW3_TRYCC Trifunctional enzyme alpha subunit, mitochondrial-like protein, putative (Fragment) OS=Trypanosoma cruzi (strain CL Brener) GN=Tc00.1047053509701.10 PE=4 SV=1;>tr|Q4CWB6|Q4CWB6_TRYCC Trifunctional enzyme alpha subunit, mitochondrial	2	40	1224700000	1567500000	650250000	1274600000	0.742419	12	12	12	194	194	194	75686	0	36959	5725800000	72	29.878	29.8472	29.4495	29.4164	Q4CLW3
+	1.68087	-0.430785	Q4DSC7	>tr|Q4DSC7|Q4DSC7_TRYCC V-type proton ATPase subunit a OS=Trypanosoma cruzi (strain CL Brener) GN=Tc00.1047053509767.70 PE=3 SV=1;>tr|Q4DK78|Q4DK78_TRYCC V-type proton ATPase subunit a OS=Trypanosoma cruzi (strain CL Brener) GN=Tc00.1047053509601.70 PE=3 S	2	17	233800000	308570000	180160000	291940000	0.74169	7	7	7	14	14	14	87926	0	31042	1403700000	25	28.0572	27.9579	27.5377	27.6158	Q4DSC7
+	2.96833	-0.437363	Q4DKL8	>tr|Q4DKL8|Q4DKL8_TRYCC Retrotransposon hot spot (RHS) protein, putative OS=Trypanosoma cruzi (strain CL Brener) GN=Tc00.1047053506843.100 PE=4 SV=1	1	11	522660000	141710000	115910000	207330000	0.738519	3	2	2	7	54	54	73041	0	31553	1653200000	22	28.4217	28.4186	27.9971	27.9685	Q4DKL8
+	1.69801	-0.447309	Q4D029	>tr|Q4D029|Q4D029_TRYCC Uncharacterized protein OS=Trypanosoma cruzi (strain CL Brener) GN=Tc00.1047053506239.40 PE=4 SV=1;>tr|Q4DHT9|Q4DHT9_TRYCC Uncharacterized protein OS=Trypanosoma cruzi (strain CL Brener) GN=Tc00.1047053506177.30 PE=4 SV=1	2	20	410540000	676790000	214550000	401680000	0.732798	5	5	5	103	103	103	68782	0	21446	2263800000	55	28.5799	28.7032	28.2124	28.1761	Q4D029
+	2.41225	-0.448879	Q4DV70	>tr|Q4DV70|Q4DV70_TRYCC Uncharacterized protein OS=Trypanosoma cruzi (strain CL Brener) GN=Tc00.1047053508173.160 PE=1 SV=1	1	12	599730000	706700000	519620000	834550000	0.732474	3	3	3	242	242	242	17952	0	2884	3406500000	38	29.1954	29.1394	28.7183	28.7187	Q4DV70
+	2.76701	-0.449086	Q4DMB4	>tr|Q4DMB4|Q4DMB4_TRYCC Mitochondrial carrier protein, putative OS=Trypanosoma cruzi (strain CL Brener) GN=Tc00.1047053504131.190 PE=3 SV=1;>tr|Q4DFR9|Q4DFR9_TRYCC Mitochondrial carrier protein, putative OS=Trypanosoma cruzi (strain CL Brener) GN=Tc00.1047	2	25	826430000	1155300000	558390000	988360000	0.732568	7	7	7	256	256	256	3151	0	27127	4546300000	30	29.5401	29.5409	29.0728	29.11	Q4DMB4
+	1.52671	-0.450221	Q4D976	>tr|Q4D976|Q4D976_TRYCC ATP-dependent DEAD/H RNA helicase, putative (Fragment) OS=Trypanosoma cruzi (strain CL Brener) GN=Tc00.1047053506691.14 PE=4 SV=1	1	35	311490000	420460000	261480000	452150000	0.731048	11	2	2	211	37	37	8907	0	36294	1998000000	27	28.3311	28.1805	27.8309	27.7802	Q4D976
+	1.73155	-0.452009	Q4D7Q2	>tr|Q4D7Q2|Q4D7Q2_TRYCC Uncharacterized protein OS=Trypanosoma cruzi (strain CL Brener) GN=Tc00.1047053510731.20 PE=4 SV=1;>tr|Q4D345|Q4D345_TRYCC Uncharacterized protein OS=Trypanosoma cruzi (strain CL Brener) GN=Tc00.1047053506887.20 PE=4 SV=1	2	11	234540000	216100000	205780000	312770000	0.731328	4	4	4	163	163	163	35134	0	56994	1221900000	18	27.7899	27.724	27.358	27.2519	Q4D7Q2
+	1.8643	-0.452665	Q4CT78	>tr|Q4CT78|Q4CT78_TRYCC Fatty acyl CoA synthetase 2, putative OS=Trypanosoma cruzi (strain CL Brener) GN=Tc00.1047053504177.20 PE=4 SV=1	2	31	106700000	169910000	102370000	189300000	0.730816	10	6	6	18	127	127	78566	0	32447	757850000	24	26.9788	27.0444	26.5167	26.6012	Q4CT78
+	1.37776	-0.458406	Q4DCN7	>tr|Q4DCN7|Q4DCN7_TRYCC Uncharacterized protein OS=Trypanosoma cruzi (strain CL Brener) GN=Tc00.1047053506943.80 PE=4 SV=1	2	8	118570000	208450000	109410000	304460000	0.728943	3	3	3	104	104	104	44398	0	44345	842270000	18	27.379	27.3042	26.7938	26.9726	Q4DCN7
+	1.53745	-0.462629	Q4DZ79	>tr|Q4DZ79|Q4DZ79_TRYCC Uncharacterized protein OS=Trypanosoma cruzi (strain CL Brener) GN=Tc00.1047053507023.70 PE=4 SV=1	1	12	366300000	549060000	226240000	467500000	0.725105	3	3	1	151	151	41	33985	0	24833	1841500000	33	28.4166	28.5557	28.0641	27.9829	Q4DZ79
+	1.73021	-0.463305	Q4E0Q0	>tr|Q4E0Q0|Q4E0Q0_TRYCC Pyruvate, phosphate dikinase OS=Trypanosoma cruzi (strain CL Brener) GN=Tc00.1047053506297.190 PE=3 SV=1	1	144	816060000	1195700000	483040000	997950000	0.725441	42	2	2	54	31	31	10083	0	40757	4005000000	20	29.6159	29.6987	29.145	29.2429	Q4E0Q0
+	1.37153	-0.466408	Q4DJU4	>tr|Q4DJU4|Q4DJU4_TRYCC ATP-dependent zinc metallopeptidase, putative OS=Trypanosoma cruzi (strain CL Brener) GN=Tc00.1047053511717.170 PE=3 SV=1;>tr|Q4DEY4|Q4DEY4_TRYCC ATP-dependent zinc metallopeptidase, putative OS=Trypanosoma cruzi (strain CL Brener)	2	38	746910000	928270000	691270000	981780000	0.722199	13	13	13	213	213	213	7571	0	1877	4326600000	98	29.5789	29.3845	28.9947	29.0359	Q4DJU4
+	1.6767	-0.47242	Q4D7V1	>tr|Q4D7V1|Q4D7V1_TRYCC Ubiquitin-protein ligase-like, putative OS=Trypanosoma cruzi (strain CL Brener) GN=Tc00.1047053508971.50 PE=4 SV=1	1	43	959010000	266970000	246070000	703860000	0.719925	18	18	18	76	76	76	457	0	31852	2735800000	49	28.9016	29.0405	28.4935	28.5037	Q4D7V1
+	1.7667	-0.474407	Q4E617	>tr|Q4E617|Q4E617_TRYCC Uncharacterized protein OS=Trypanosoma cruzi (strain CL Brener) GN=Tc00.1047053508153.760 PE=4 SV=1;>tr|Q4CZR5|Q4CZR5_TRYCC Uncharacterized protein OS=Trypanosoma cruzi (strain CL Brener) GN=Tc00.1047053503903.60 PE=4 SV=1	2	10	521100000	623120000	551500000	687350000	0.719229	3	3	3	26	26	26	12653	0	30614	3349400000	14	29.2455	29.1268	28.7326	28.691	Q4E617
+	2.69417	-0.476439	Q4DRW6	>tr|Q4DRW6|Q4DRW6_TRYCC Dynein intermediate chain, putative OS=Trypanosoma cruzi (strain CL Brener) GN=Tc00.1047053507669.70 PE=4 SV=1;>tr|Q4D4E6|Q4D4E6_TRYCC Dynein intermediate chain, putative OS=Trypanosoma cruzi (strain CL Brener) GN=Tc00.1047053507857	2	27	613180000	1035300000	540430000	823000000	0.71878	8	8	8	147	147	147	74647	0	55594	4127800000	71	29.3984	29.3743	28.8921	28.9276	Q4DRW6
+	3.1327	-0.480293	Q4DE37	>tr|Q4DE37|Q4DE37_TRYCC Plasma membrane ATPase OS=Trypanosoma cruzi (strain CL Brener) GN=Tc00.1047053506649.20 PE=3 SV=1	2	56	1258900000	1743100000	952720000	1491000000	0.716823	16	15	15	264	255	255	99607	0	74791	6809300000	90	30.2248	30.2459	29.7627	29.7474	Q4DE37
+	1.73479	-0.480998	Q4DTK1	>tr|Q4DTK1|Q4DTK1_TRYCC Uncharacterized protein OS=Trypanosoma cruzi (strain CL Brener) GN=Tc00.1047053507053.40 PE=4 SV=1	1	15	986220000	1231800000	519660000	1138600000	0.717159	4	4	4	305	305	305	12484	0	88932	5302600000	40	29.8199	29.8498	29.2894	29.4184	Q4DTK1
+	1.87936	-0.482517	Q4D2C9	>tr|Q4D2C9|Q4D2C9_TRYCC Oligosaccharyl transferase subunit, putative OS=Trypanosoma cruzi (strain CL Brener) GN=Tc00.1047053505163.80 PE=4 SV=1	3	30	1046800000	1405100000	764410000	1440000000	0.71561	8	8	8	142	142	142	90585	0	76101	5906400000	128	30.0174	30.1049	29.6136	29.5436	Q4D2C9
+	1.27781	-0.489127	Q4CTN1	>tr|Q4CTN1|Q4CTN1_TRYCC Uncharacterized protein OS=Trypanosoma cruzi (strain CL Brener) GN=Tc00.1047053508137.20 PE=4 SV=1;>tr|Q4CLZ2|Q4CLZ2_TRYCC Uncharacterized protein OS=Trypanosoma cruzi (strain CL Brener) GN=Tc00.1047053453445.10 PE=4 SV=1	2	14	557440000	682180000	384550000	443510000	0.714758	4	4	4	388	388	388	15942	0	29301	2714600000	35	28.919	28.9412	28.5575	28.3245	Q4CTN1
+	1.5418	-0.492218	Q4DXY8	>tr|Q4DXY8|Q4DXY8_TRYCC CAAX prenyl protease 1, putative OS=Trypanosoma cruzi (strain CL Brener) GN=Tc00.1047053510431.40 PE=3 SV=1	1	20	430090000	534510000	258410000	406620000	0.710871	6	6	2	171	171	51	48546	0	83638	2248800000	55	28.6854	28.5619	28.0726	28.1903	Q4DXY8
+	1.64056	-0.49363	Q4CTC8	>tr|Q4CTC8|Q4CTC8_TRYCC Uncharacterized protein OS=Trypanosoma cruzi (strain CL Brener) GN=Tc00.1047053507569.10 PE=4 SV=1	1	89	559540000	496370000	361700000	557910000	0.710271	29	6	6	405	143	143	93092	0	73041	2597400000	53	28.8636	28.969	28.4773	28.368	Q4CTC8
+	2.36686	-0.494596	Q4E128	>tr|Q4E128|Q4E128_TRYCC Replication factor C, subunit 5, putative OS=Trypanosoma cruzi (strain CL Brener) GN=Tc00.1047053506247.270 PE=4 SV=1	1	10	220940000	287950000	206900000	306480000	0.709632	3	3	3	166	166	166	39168	0	45342	1272300000	28	27.86	27.9202	27.4078	27.3833	Q4E128
+	1.76849	-0.49683	Q4DUG1	>tr|Q4DUG1|Q4DUG1_TRYCC Uncharacterized protein OS=Trypanosoma cruzi (strain CL Brener) GN=Tc00.1047053508837.80 PE=4 SV=1	2	46	1263400000	1408200000	879480000	1387300000	0.709337	15	15	15	77	77	77	43603	0	98368	6960400000	173	30.2448	30.2714	29.8256	29.6969	Q4DUG1
+	1.48992	-0.498392	Q4CL00	>tr|Q4CL00|Q4CL00_TRYCC Calpain-like cysteine peptidase, putative (Fragment) OS=Trypanosoma cruzi (strain CL Brener) GN=Tc00.1047053510957.9 PE=4 SV=1	1	44	1210700000	1916100000	744220000	1196300000	0.708738	12	4	4	433	229	229	40308	0	23234	6962700000	73	30.0675	30.1511	29.5291	29.6928	Q4CL00
+	1.42491	-0.500722	Q4DVF8	>tr|Q4DVF8|Q4DVF8_TRYCC Uncharacterized protein OS=Trypanosoma cruzi (strain CL Brener) GN=Tc00.1047053506859.180 PE=4 SV=1	1	56	95081000	91741000	75850000	56756000	0.705999	16	2	1	466	92	3	42813	0	31729	718340000	27	26.7	26.5301	26.1669	26.0617	Q4DVF8
+	2.42807	-0.502669	Q4CU52	>tr|Q4CU52|Q4CU52_TRYCC D-isomer specific 2-hydroxyacid dehydrogenase-protein, putative (Fragment) OS=Trypanosoma cruzi (strain CL Brener) GN=Tc00.1047053506263.10 PE=4 SV=1	1	58	2047400000	2630900000	1438000000	2677800000	0.705748	16	4	4	553	126	126	28534	0	3877	10157000000	30	31.141	31.091	30.6313	30.5953	Q4CU52
+	1.62132	-0.503959	Q4D1D3	>tr|Q4D1D3|Q4D1D3_TRYCC Myosin heavy chain, putative (Fragment) OS=Trypanosoma cruzi (strain CL Brener) GN=Tc00.1047053506491.20 PE=4 SV=1;>tr|Q4CKU2|Q4CKU2_TRYCC Uncharacterized protein (Fragment) OS=Trypanosoma cruzi (strain CL Brener) GN=Tc00.1047053443	2	50	97184000	75206000	75392000	67722000	0.704139	15	3	3	233	62	62	39891	0	63002	405680000	16	26.138	26.2954	25.7025	25.723	Q4D1D3
+	1.35168	-0.50782	Q4E349	>tr|Q4E349|Q4E349_TRYCC Uncharacterized protein OS=Trypanosoma cruzi (strain CL Brener) GN=Tc00.1047053508741.229 PE=4 SV=1	1	61	622860000	765420000	300570000	553330000	0.705015	17	5	3	743	298	224	29636	0	40518	3203100000	33	29.1234	29.0594	28.6897	28.4775	Q4E349
+	1.47196	-0.508667	Q4DX10	>tr|Q4DX10|Q4DX10_TRYCC Mu-adaptin 1, putative OS=Trypanosoma cruzi (strain CL Brener) GN=Tc00.1047053510533.40 PE=3 SV=1;>tr|Q4DQU4|Q4DQU4_TRYCC Mu-adaptin 1, putative OS=Trypanosoma cruzi (strain CL Brener) GN=Tc00.1047053511821.30 PE=3 SV=1	2	11	271530000	375070000	194310000	317720000	0.701866	4	4	4	109	109	109	49206	0	11464	1471100000	40	27.9561	28.1302	27.5746	27.4943	Q4DX10
+	2.39631	-0.511044	Q4CPQ6	>tr|Q4CPQ6|Q4CPQ6_TRYCC Calpain cysteine peptidase, putative (Fragment) OS=Trypanosoma cruzi (strain CL Brener) GN=Tc00.1047053505985.9 PE=4 SV=1	1	105	10233000000	11336000000	7438100000	12946000000	0.701893	34	29	21	386	34	184	2008	0	25322	55825000000	310	33.2484	33.2466	32.704	32.7689	Q4CPQ6
+	1.76178	-0.514068	Q4DEE1	>tr|Q4DEE1|Q4DEE1_TRYCC Serine-palmitoyl-CoA transferase, putative OS=Trypanosoma cruzi (strain CL Brener) GN=Tc00.1047053506405.50 PE=4 SV=1	3	19	364950000	550390000	284020000	411790000	0.70025	7	7	7	187	187	187	54408	0	54621	2024400000	33	28.465	28.3683	27.854	27.9512	Q4DEE1
+	1.6187	-0.515388	Q4CQP1	>tr|Q4CQP1|Q4CQP1_TRYCC Uncharacterized protein OS=Trypanosoma cruzi (strain CL Brener) GN=Tc00.1047053511065.10 PE=4 SV=1	1	37	825520000	1130900000	958930000	1544700000	0.70047	10	10	1	444	444	41	29817	0	57685	5913300000	108	29.9325	29.8782	29.3132	29.4668	Q4CQP1
+	2.81638	-0.519707	Q4DGG5	>tr|Q4DGG5|Q4DGG5_TRYCC Vacuolar-type proton translocating pyrophosphatase 1, putative OS=Trypanosoma cruzi (strain CL Brener) GN=Tc00.1047053510773.20 PE=3 SV=1	1	67	8643400000	11107000000	5681500000	9580400000	0.697542	19	19	4	305	305	106	85337	0	32331	44608000000	209	32.9997	32.9779	32.4519	32.4862	Q4DGG5
+	3.50734	-0.52564	Q4DDX3	>tr|Q4DDX3|Q4DDX3_TRYCC Calreticulin, putative OS=Trypanosoma cruzi (strain CL Brener) GN=Tc00.1047053509011.40 PE=3 SV=1	1	57	2210700000	3474000000	2040600000	3249500000	0.694664	18	18	6	474	474	97	46211	0	32331	13836000000	194	31.1871	31.1836	30.6506	30.6688	Q4DDX3
+	2.03243	-0.531672	Q4DL45	>tr|Q4DL45|Q4DL45_TRYCC Uncharacterized protein OS=Trypanosoma cruzi (strain CL Brener) GN=Tc00.1047053503893.30 PE=4 SV=1	1	15	487200000	564850000	307310000	532350000	0.691755	5	5	1	29	29	59	20232	0	43993	2775800000	32	28.9651	28.8923	28.4336	28.3604	Q4DL45
+	1.26493	-0.535009	Q4DQB0	>tr|Q4DQB0|Q4DQB0_TRYCC Cysteine peptidase C (CPC), putative OS=Trypanosoma cruzi (strain CL Brener) GN=Tc00.1047053511827.100 PE=3 SV=1	1	34	3089700000	4034200000	2179000000	3478900000	0.691864	9	9	3	324	324	9	3671	0	10915	17170000000	68	31.6201	31.5052	31.1443	30.9109	Q4DQB0
+	1.49449	-0.537591	Q4CV42	>tr|Q4CV42|Q4CV42_TRYCC Calpain-like cysteine peptidase, putative OS=Trypanosoma cruzi (strain CL Brener) GN=Tc00.1047053509001.40 PE=4 SV=1	1	19	977330000	1070300000	570210000	688040000	0.687356	6	6	6	32	32	32	16678	0	23145	4353000000	20	29.5302	29.7261	29.0795	29.1016	Q4CV42
+	1.38946	-0.5381	Q4CRN7	>tr|Q4CRN7|Q4CRN7_TRYCC R27-2 protein, putative OS=Trypanosoma cruzi (strain CL Brener) GN=Tc00.1047053510247.10 PE=4 SV=1	1	56	2947400000	3188800000	1426500000	2352800000	0.690665	16	16	4	367	367	67	18122	0	49384	14169000000	82	31.3084	31.2748	30.6426	30.8644	Q4CRN7
+	1.55599	-0.54123	Q4CVY4	>tr|Q4CVY4|Q4CVY4_TRYCC Carbonic anhydrase-like protein, putative OS=Trypanosoma cruzi (strain CL Brener) GN=Tc00.1047053509597.20 PE=4 SV=1	1	17	380880000	387200000	268460000	541000000	0.688268	5	5	3	132	132	71	71129	0	12373	1883000000	33	28.3671	28.4292	27.7701	27.9437	Q4CVY4
+	1.56386	-0.545764	Q4DFM4	>tr|Q4DFM4|Q4DFM4_TRYCC Heterogeneous nuclear ribonucleoprotein H/F, putative OS=Trypanosoma cruzi (strain CL Brener) GN=Tc00.1047053511109.130 PE=4 SV=1;>tr|Q4DGN8|Q4DGN8_TRYCC Heterogeneous nuclear ribonucleoprotein H/F, putative OS=Trypanosoma cruzi (st	2	43	1240300000	1630100000	897580000	1789200000	0.683678	12	12	12	333	333	333	49954	0	64986	7295400000	79	30.3093	30.1266	29.6609	29.6835	Q4DFM4
+	1.25534	-0.54735	Q4DCD5	>tr|Q4DCD5|Q4DCD5_TRYCC Prefoldin subunit, putative OS=Trypanosoma cruzi (strain CL Brener) GN=Tc00.1047053507867.70 PE=4 SV=1;>tr|Q4E3W6|Q4E3W6_TRYCC Prefoldin subunit, putative OS=Trypanosoma cruzi (strain CL Brener) GN=Tc00.1047053510629.430 PE=4 SV=1	2	4	146000000	167800000	68870000	117680000	0.681404	1	1	1	87	87	87	15945	0	13629	679350000	18	27.0867	26.8196	26.4231	26.3884	Q4DCD5
+	1.85837	-0.549514	Q4E4E4	>tr|Q4E4E4|Q4E4E4_TRYCC Tyrosine aminotransferase, putative OS=Trypanosoma cruzi (strain CL Brener) GN=Tc00.1047053510187.70 PE=4 SV=1	1	23	787880000	1234200000	1061300000	1480200000	0.683807	9	8	8	323	282	282	45662	0	22767	5721700000	47	30.0282	29.9862	29.3957	29.5195	Q4E4E4
+	2.03336	-0.551422	Q4E589	>tr|Q4E589|Q4E589_TRYCC Uncharacterized protein OS=Trypanosoma cruzi (strain CL Brener) GN=Tc00.1047053506559.410 PE=4 SV=1	1	70	3304500000	3907700000	2588000000	4898600000	0.682746	21	21	21	646	646	646	42107	0	18217	17921000000	154	31.746	31.7751	31.1577	31.2605	Q4E589
+	1.48624	-0.551905	Q4E631	>tr|Q4E631|Q4E631_TRYCC Uncharacterized protein OS=Trypanosoma cruzi (strain CL Brener) GN=Tc00.1047053508153.610 PE=4 SV=1	2	20	387950000	466830000	218850000	277000000	0.683829	7	7	3	159	159	64	65311	0	35204	1714400000	29	28.3776	28.3717	27.925	27.7206	Q4E631
+	1.60169	-0.553029	Q4E5H5	>tr|Q4E5H5|Q4E5H5_TRYCC Uncharacterized protein OS=Trypanosoma cruzi (strain CL Brener) GN=Tc00.1047053511277.180 PE=4 SV=1	1	13	111860000	100160000	48674000	100950000	0.680432	5	5	5	138	138	138	59497	0	8584	561150000	20	26.7405	26.5672	26.0798	26.1217	Q4E5H5
+	2.13247	-0.553488	Q4DPX9	>tr|Q4DPX9|Q4DPX9_TRYCC ABC transporter, putative OS=Trypanosoma cruzi (strain CL Brener) GN=Tc00.1047053507049.50 PE=4 SV=1;>tr|Q4DBU3|Q4DBU3_TRYCC ABC transporter, putative OS=Trypanosoma cruzi (strain CL Brener) GN=Tc00.1047053506567.60 PE=4 SV=1	2	13	186470000	159040000	140530000	165660000	0.681615	4	4	4	65	65	65	7236	0	11693	839220000	26	27.4137	27.4535	26.8366	26.9235	Q4DPX9
+	2.42223	-0.554018	Q4DDB3	>tr|Q4DDB3|Q4DDB3_TRYCC Uncharacterized protein OS=Trypanosoma cruzi (strain CL Brener) GN=Tc00.1047053505193.100 PE=4 SV=1;>tr|Q4D0G6|Q4D0G6_TRYCC Uncharacterized protein OS=Trypanosoma cruzi (strain CL Brener) GN=Tc00.1047053506467.29 PE=4 SV=1	2	22	549700000	765960000	605830000	738820000	0.681139	7	7	7	271	271	271	39755	0	54641	3417100000	41	29.1331	29.179	28.6273	28.5768	Q4DDB3
+	1.40037	-0.556314	Q4DRV2	>tr|Q4DRV2|Q4DRV2_TRYCC Uncharacterized protein OS=Trypanosoma cruzi (strain CL Brener) GN=Tc00.1047053507669.190 PE=4 SV=1;>tr|Q4CYZ3|Q4CYZ3_TRYCC Uncharacterized protein (Fragment) OS=Trypanosoma cruzi (strain CL Brener) GN=Tc00.1047053509877.10 PE=4 SV=	2	11	187880000	333480000	125290000	217230000	0.678106	3	3	3	164	164	164	30361	0	12099	1101000000	34	27.4671	27.6904	27.0473	26.9976	Q4DRV2
+	1.41863	-0.560632	Q4DRT8	>tr|Q4DRT8|Q4DRT8_TRYCC Delta-1-pyrroline-5-carboxylate dehydrogenase, putative OS=Trypanosoma cruzi (strain CL Brener) GN=Tc00.1047053510943.50 PE=3 SV=1	1	38	2066200000	2879200000	1474900000	2088600000	0.679093	11	11	7	285	285	201	62476	0	81448	10156000000	131	31.0145	30.9047	30.4974	30.3005	Q4DRT8
+	1.36506	-0.56333	Q4DGT4	>tr|Q4DGT4|Q4DGT4_TRYCC Retrotransposon hot spot (RHS) protein, putative OS=Trypanosoma cruzi (strain CL Brener) GN=Tc00.1047053509265.10 PE=4 SV=1	1	45	1094300000	1464800000	956580000	1364400000	0.674368	14	10	7	291	223	184	67054	0	40391	6058900000	65	29.9489	30.1908	29.5081	29.505	Q4DGT4
+	1.75797	-0.564712	Q4D905	>tr|Q4D905|Q4D905_TRYCC Uncharacterized protein OS=Trypanosoma cruzi (strain CL Brener) GN=Tc00.1047053505171.60 PE=4 SV=1	1	23	549240000	542370000	485620000	623570000	0.675164	7	7	4	264	264	17	43757	0	12245	2891700000	62	29.0624	28.9112	28.4208	28.4235	Q4D905
+	1.47406	-0.566075	Q4DID6	>tr|Q4DID6|Q4DID6_TRYCC Serine palmitoyltransferase, putative OS=Trypanosoma cruzi (strain CL Brener) GN=Tc00.1047053506959.70 PE=3 SV=1	1	18	259850000	413480000	70420000	193760000	0.676582	6	6	1	121	121	23	62653	0	35598	1148200000	42	27.7261	27.8195	27.1111	27.3023	Q4DID6
+	2.22945	-0.568236	Q4CPG2	>tr|Q4CPG2|Q4CPG2_TRYCC Dynein heavy chain, putative (Fragment) OS=Trypanosoma cruzi (strain CL Brener) GN=Tc00.1047053509583.19 PE=4 SV=1	1	32	562840000	948170000	391230000	823130000	0.67413	11	11	11	172	172	172	90231	0	64137	3515900000	53	29.198	29.2857	28.6728	28.6744	Q4CPG2
+	1.5074	-0.569761	Q4D833	>tr|Q4D833|Q4D833_TRYCC TPR-repeat protein, putative OS=Trypanosoma cruzi (strain CL Brener) GN=Tc00.1047053511627.100 PE=4 SV=1;>tr|Q4DPL2|Q4DPL2_TRYCC TPR-repeat protein, putative OS=Trypanosoma cruzi (strain CL Brener) GN=Tc00.1047053507801.140 PE=4 SV=	2	16	178110000	288910000	201380000	227050000	0.672376	5	5	5	128	128	128	54417	0	21349	1057400000	30	27.5821	27.7768	27.143	27.0764	Q4D833
+	2.0393	-0.57206	Q4DJ07	>sp|Q4DJ07|PGFS_TRYCC Prostaglandin F synthase OS=Trypanosoma cruzi (strain CL Brener) GN=Tc00.1047053511287.49 PE=1 SV=2	1	68	12171000000	16835000000	8468800000	12322000000	0.673142	18	18	18	678	678	678	32571	0	18576	65584000000	216	33.5079	33.5148	32.9942	32.8843	Q4DJ07
+	1.39233	-0.572261	Q4DLY0	>tr|Q4DLY0|Q4DLY0_TRYCC Cytochrome b5-like, putative OS=Trypanosoma cruzi (strain CL Brener) GN=Tc00.1047053506753.110 PE=3 SV=1	1	20	1221800000	1234700000	756610000	1350900000	0.670528	5	5	1	595	595	86	12662	0	70225	5484200000	65	30.1592	29.9279	29.4987	29.4439	Q4DLY0
+	2.38451	-0.57513	Q4DRX1	>tr|Q4DRX1|Q4DRX1_TRYCC Fumarate hydratase, putative OS=Trypanosoma cruzi (strain CL Brener) GN=Tc00.1047053507669.10 PE=4 SV=1	1	43	736110000	1025900000	520500000	962510000	0.671207	12	12	1	308	308	29	60832	0	51778	5484000000	74	29.771	29.7162	29.1935	29.1435	Q4DRX1
+	1.80785	-0.577016	Q4CUP1	>tr|Q4CUP1|Q4CUP1_TRYCC Fructose-1,6-bisphosphatase, cytosolic, putative OS=Trypanosoma cruzi (strain CL Brener) GN=Tc00.1047053508351.10 PE=3 SV=1	1	11	182900000	285940000	91307000	204030000	0.669851	3	3	2	67	67	38	37899	0	44214	1051600000	12	27.4273	27.557	26.8819	26.9484	Q4CUP1
+	1.25895	-0.583235	Q4DFZ4	>tr|Q4DFZ4|Q4DFZ4_TRYCC Uncharacterized protein OS=Trypanosoma cruzi (strain CL Brener) GN=Tc00.1047053506635.44 PE=4 SV=1	1	4	150780000	186210000	93812000	116210000	0.670448	1	1	1	189	189	189	11248	0	62437	783650000	25	27.1826	27.1223	26.7089	26.4296	Q4DFZ4
+	1.41364	-0.584806	Q4E0H1	>tr|Q4E0H1|Q4E0H1_TRYCC Uncharacterized protein OS=Trypanosoma cruzi (strain CL Brener) GN=Tc00.1047053510155.50 PE=4 SV=1;>tr|Q4E177|Q4E177_TRYCC Uncharacterized protein OS=Trypanosoma cruzi (strain CL Brener) GN=Tc00.1047053511585.50 PE=4 SV=1	2	9	203630000	237150000	130630000	168530000	0.668972	4	4	4	131	131	131	48851	0	22649	1201200000	33	27.6869	27.698	27.2258	26.9895	Q4E0H1
+	1.46172	-0.595055	Q4DS02	>tr|Q4DS02|Q4DS02_TRYCC Uncharacterized protein OS=Trypanosoma cruzi (strain CL Brener) GN=Tc00.1047053507949.250 PE=4 SV=1	1	12	484500000	701500000	261200000	630650000	0.66225	4	4	4	13	13	13	39238	0	1851	3363700000	40	28.8153	28.9666	28.2112	28.3805	Q4DS02
+	1.59655	-0.599474	Q4E132	>tr|Q4E132|Q4E132_TRYCC Prolyl oligopeptidase, putative OS=Trypanosoma cruzi (strain CL Brener) GN=Tc00.1047053506247.230 PE=4 SV=1	1	35	767420000	1015500000	634880000	1248600000	0.658841	10	10	10	178	178	178	78306	0	62256	4792700000	103	29.5578	29.7408	29.017	29.0828	Q4E132
+	1.36471	-0.605706	Q4D2D7	>tr|Q4D2D7|Q4D2D7_TRYCC Mitochondrial structure specific endonuclease I (SSE-1), putative (Fragment) OS=Trypanosoma cruzi (strain CL Brener) GN=Tc00.1047053506869.70 PE=4 SV=1;>tr|Q4DEB3|Q4DEB3_TRYCC Mitochondrial structure specific endonuclease I (SSE-1),	2	12	184490000	250270000	285880000	477530000	0.65602	4	4	4	221	221	221	29754	0	71585	1408800000	32	27.7634	27.9829	27.1976	27.3373	Q4D2D7
+	1.236	-0.605857	Q4DNU7	>tr|Q4DNU7|Q4DNU7_TRYCC Uncharacterized protein OS=Trypanosoma cruzi (strain CL Brener) GN=Tc00.1047053511003.30 PE=4 SV=1	1	28	172500000	269970000	140030000	277840000	0.660143	8	8	8	59	59	59	24421	0	67695	1046000000	21	27.4197	27.5084	27.0043	26.712	Q4DNU7
+	2.33765	-0.607052	Q4DUI1	>tr|Q4DUI1|Q4DUI1_TRYCC Uncharacterized protein OS=Trypanosoma cruzi (strain CL Brener) GN=Tc00.1047053510661.110 PE=4 SV=1;>tr|Q4DRL1|Q4DRL1_TRYCC Uncharacterized protein OS=Trypanosoma cruzi (strain CL Brener) GN=Tc00.1047053510741.150 PE=4 SV=1	2	17	192200000	306390000	100310000	311360000	0.65651	6	6	6	144	144	144	58144	0	20532	1063200000	23	27.6131	27.5519	26.9477	27.0031	Q4DUI1
+	2.90419	-0.60795	Q4D6J0	>tr|Q4D6J0|Q4D6J0_TRYCC Calpain-like cysteine peptidase, putative OS=Trypanosoma cruzi (strain CL Brener) GN=Tc00.1047053506721.30 PE=3 SV=1	2	271	8025500000	10636000000	5184200000	8880000000	0.656128	81	81	26	276	276	9	51934	0	32331	41052000000	632	32.9286	32.8979	32.2902	32.3203	Q4D6J0
+	2.75551	-0.613925	Q4CZB7	>tr|Q4CZB7|Q4CZB7_TRYCC Uncharacterized protein OS=Trypanosoma cruzi (strain CL Brener) GN=Tc00.1047053511559.20 PE=4 SV=1	1	17	229560000	263620000	233720000	229690000	0.653407	6	3	3	261	168	168	43785	0	16023	1246900000	24	27.7367	27.7747	27.1244	27.1591	Q4CZB7
+	2.56269	-0.6206	Q4CSZ2	>tr|Q4CSZ2|Q4CSZ2_TRYCC Calmodulin OS=Trypanosoma cruzi (strain CL Brener) GN=Tc00.1047053506391.10 PE=4 SV=1;>tr|Q4D137|Q4D137_TRYCC Calmodulin OS=Trypanosoma cruzi (strain CL Brener) GN=Tc00.1047053507483.50 PE=4 SV=1;>tr|Q4D139|Q4D139_TRYCC Calmodulin,	4	66	13832000000	18412000000	8836200000	13206000000	0.650235	17	17	17	96	96	96	16824	0	32331	72572000000	300	33.7058	33.7708	33.1156	33.1198	Q4CSZ2
+	2.32621	-0.620833	Q4DWC2	>tr|Q4DWC2|Q4DWC2_TRYCC Uncharacterized protein OS=Trypanosoma cruzi (strain CL Brener) GN=Tc00.1047053509733.110 PE=4 SV=1	1	35	818520000	1085200000	432070000	831100000	0.65001	12	12	12	387	387	387	5904	0	12514	4305100000	98	29.7015	29.6159	29.039	29.0366	Q4DWC2
+	1.2664	-0.627733	Q4DSE5	>tr|Q4DSE5|Q4DSE5_TRYCC Uncharacterized protein OS=Trypanosoma cruzi (strain CL Brener) GN=Tc00.1047053504057.97 PE=4 SV=1	1	31	486920000	637550000	343260000	439320000	0.649893	9	9	9	33	33	33	40157	0	57182	2700800000	87	28.9933	28.8852	28.4539	28.1691	Q4DSE5
+	1.43791	-0.629905	Q4D1P9	>tr|Q4D1P9|Q4D1P9_TRYCC Uncharacterized protein OS=Trypanosoma cruzi (strain CL Brener) GN=Tc00.1047053509819.20 PE=4 SV=1;>tr|Q4CQH6|Q4CQH6_TRYCC Uncharacterized protein OS=Trypanosoma cruzi (strain CL Brener) GN=Tc00.1047053503663.20 PE=4 SV=1	2	20	508820000	471100000	291120000	592640000	0.645214	6	6	6	108	108	108	92702	0	18269	2283100000	47	28.8309	28.6221	28.0302	28.163	Q4D1P9
+	1.249	-0.643006	Q4DE64	>tr|Q4DE64|Q4DE64_TRYCC DNA topoisomerase IA, putative OS=Trypanosoma cruzi (strain CL Brener) GN=Tc00.1047053506493.80 PE=4 SV=1;>tr|Q4DQ13|Q4DQ13_TRYCC DNA topoisomerase IA, putative OS=Trypanosoma cruzi (strain CL Brener) GN=Tc00.1047053510121.160 PE=4	2	31	381260000	531660000	403190000	479550000	0.639603	10	10	10	209	209	209	91882	0	14344	2231400000	65	28.5133	28.7601	28.0947	27.8927	Q4DE64
+	1.92151	-0.643556	Q4CKF1	>tr|Q4CKF1|Q4CKF1_TRYCC Dynein heavy chain, putative (Fragment) OS=Trypanosoma cruzi (strain CL Brener) GN=Tc00.1047053479379.9 PE=4 SV=1	1	8	165310000	205660000	84667000	170650000	0.640215	2	2	2	72	72	72	4582	0	65131	821980000	24	27.293	27.1979	26.549	26.6547	Q4CKF1
+	1.90232	-0.652059	Q4DF93	>tr|Q4DF93|Q4DF93_TRYCC Uncharacterized protein OS=Trypanosoma cruzi (strain CL Brener) GN=Tc00.1047053506009.10 PE=4 SV=1;>tr|Q4CZ08|Q4CZ08_TRYCC Uncharacterized protein (Fragment) OS=Trypanosoma cruzi (strain CL Brener) GN=Tc00.1047053510295.59 PE=4 SV=1	3	8	232090000	351110000	140060000	200410000	0.636919	3	3	3	93	93	93	5037	0	7546	1455500000	32	28.2349	28.1741	27.4853	27.6195	Q4DF93
+	2.52701	-0.65655	Q4D418	>tr|Q4D418|Q4D418_TRYCC Glycosomal membrane protein, putative OS=Trypanosoma cruzi (strain CL Brener) GN=Tc00.1047053511017.50 PE=4 SV=1	1	47	2840700000	7119600000	4110200000	2879300000	0.634558	14	14	2	674	674	133	23939	0	15261	21717000000	109	31.9943	32.0143	31.3822	31.3133	Q4D418
+	1.44579	-0.659189	Q4DZP1	>tr|Q4DZP1|Q4DZP1_TRYCC Uncharacterized protein OS=Trypanosoma cruzi (strain CL Brener) GN=Tc00.1047053504147.30 PE=4 SV=1	1	10	89807000	114520000	76836000	171860000	0.635609	3	3	3	181	181	181	29872	0	46864	549410000	16	26.5958	26.6367	25.8304	26.0836	Q4DZP1
+	1.36745	-0.663813	Q4DSE6	>tr|Q4DSE6|Q4DSE6_TRYCC Uncharacterized protein OS=Trypanosoma cruzi (strain CL Brener) GN=Tc00.1047053504057.90 PE=4 SV=1	1	9	179830000	260370000	109510000	135160000	0.632209	3	3	3	159	159	159	28678	0	17124	949440000	25	27.368	27.5329	26.9024	26.6709	Q4DSE6
+	1.33883	-0.668709	Q4CMC7	>tr|Q4CMC7|Q4CMC7_TRYCC Uncharacterized protein OS=Trypanosoma cruzi (strain CL Brener) GN=Tc00.1047053506551.10 PE=4 SV=1	4	24	599160000	790220000	411550000	560840000	0.632118	9	9	4	19	19	97	68595	0	57555	4555800000	68	29.1569	29.2175	28.6637	28.3733	Q4CMC7
+	1.5999	-0.66916	Q4DFH6	>tr|Q4DFH6|Q4DFH6_TRYCC Galactokinase, putative OS=Trypanosoma cruzi (strain CL Brener) GN=Tc00.1047053510667.120 PE=4 SV=1	1	16	302530000	393250000	302820000	511890000	0.629732	5	5	1	158	158	28	51335	0	812	1807300000	37	28.3334	28.443	27.8122	27.6258	Q4DFH6
+	2.21603	-0.670228	Q4CVL1	>tr|Q4CVL1|Q4CVL1_TRYCC Amastin, putative OS=Trypanosoma cruzi (strain CL Brener) GN=Tc00.1047053509051.20 PE=4 SV=1	1	14	361290000	497190000	219580000	362400000	0.628822	4	4	2	36	36	129	19588	0	52497	2057300000	24	28.3087	28.3039	27.5836	27.6885	Q4CVL1
+	1.72645	-0.673699	Q4DV43	>tr|Q4DV43|Q4DV43_TRYCC Triosephosphate isomerase OS=Trypanosoma cruzi (strain CL Brener) GN=Tc00.1047053508647.200 PE=3 SV=1	1	39	5999600000	7174000000	3518300000	5560800000	0.627365	10	10	10	502	502	502	27305	0	15578	29309000000	184	32.4476	32.3412	31.7978	31.6436	Q4DV43
+	1.93756	-0.674586	Q4D8H6	>tr|Q4D8H6|Q4D8H6_TRYCC Uncharacterized protein OS=Trypanosoma cruzi (strain CL Brener) GN=Tc00.1047053511309.70 PE=4 SV=1;>tr|Q4CX17|Q4CX17_TRYCC Uncharacterized protein OS=Trypanosoma cruzi (strain CL Brener) GN=Tc00.1047053511759.30 PE=4 SV=1	2	19	332590000	315600000	289440000	430490000	0.625889	6	6	6	135	135	135	5514	0	23555	1686200000	22	28.4563	28.3186	27.6883	27.7374	Q4D8H6
+	1.33401	-0.684088	Q4DB82	>tr|Q4DB82|Q4DB82_TRYCC NUP-1 protein, putative (Fragment) OS=Trypanosoma cruzi (strain CL Brener) GN=Tc00.1047053508441.10 PE=4 SV=1	1	24	731920000	896330000	403420000	1190300000	0.625444	8	8	8	10	10	10	87592	0	15204	4011400000	35	29.3963	29.473	28.6028	28.8983	Q4DB82
+	2.23228	-0.684718	Q4DHG0	>tr|Q4DHG0|Q4DHG0_TRYCC Nucleobase transporter, putative OS=Trypanosoma cruzi (strain CL Brener) GN=Tc00.1047053506445.110 PE=4 SV=1	1	12	176120000	349570000	168390000	43898000	0.62177	4	4	4	107	107	107	47563	0	76823	1238100000	22	27.6814	27.7831	27.0613	27.0338	Q4DHG0
+	1.77298	-0.697335	Q4CMR4	>tr|Q4CMR4|Q4CMR4_TRYCC 2-oxoglutarate dehydrogenase subunit, putative (Fragment) OS=Trypanosoma cruzi (strain CL Brener) GN=Tc00.1047053503793.10 PE=4 SV=1	1	12	154670000	194250000	91201000	155430000	0.617937	3	1	1	151	56	56	38021	0	17885	810000000	19	27.2323	27.2158	26.6181	26.4354	Q4CMR4
+	1.20757	-0.70844	Q4D511	>tr|Q4D511|Q4D511_TRYCC Eukaryotic translation initiation factor eIF-4E, putative OS=Trypanosoma cruzi (strain CL Brener) GN=Tc00.1047053503593.10 PE=3 SV=1	1	16	82547000	128210000	110720000	133410000	0.607038	5	5	2	238	238	10	28948	0	10133	539180000	16	26.8917	26.5226	26.0132	25.9842	Q4D511
+	1.2519	-0.710405	Q4CV63	>tr|Q4CV63|Q4CV63_TRYCC Uncharacterized protein (Fragment) OS=Trypanosoma cruzi (strain CL Brener) GN=Tc00.1047053506693.50 PE=4 SV=1	1	8	102360000	134300000	27258000	26556000	0.615014	2	2	2	81	81	81	51121	0	74103	441790000	26	26.2821	26.1872	25.6933	25.3553	Q4CV63
+	2.07095	-0.724421	Q4DQS9	>tr|Q4DQS9|Q4DQS9_TRYCC Uncharacterized protein (Fragment) OS=Trypanosoma cruzi (strain CL Brener) GN=Tc00.1047053511821.179 PE=4 SV=1	3	57	5994100000	8519700000	4062100000	7293900000	0.605515	19	19	7	532	532	267	14383	0	32331	36495000000	143	32.5991	32.5267	31.895	31.7818	Q4DQS9
+	1.39538	-0.72827	Q4DZX3	>tr|Q4DZX3|Q4DZX3_TRYCC Uncharacterized protein OS=Trypanosoma cruzi (strain CL Brener) GN=Tc00.1047053506789.160 PE=4 SV=1;>tr|Q4DQ85|Q4DQ85_TRYCC Uncharacterized protein OS=Trypanosoma cruzi (strain CL Brener) GN=Tc00.1047053508387.140 PE=4 SV=1	2	16	195860000	276040000	52877000	196120000	0.605085	6	6	6	11	11	11	67579	0	20313	1012100000	19	27.7234	27.5644	26.7877	27.0436	Q4DZX3
+	1.45367	-0.729903	Q4CVT7	>tr|Q4CVT7|Q4CVT7_TRYCC Imidazolonepropionase, putative OS=Trypanosoma cruzi (strain CL Brener) GN=Tc00.1047053508741.140 PE=4 SV=1	1	23	1993500000	1990600000	668900000	2241600000	0.603218	6	6	5	188	188	172	46733	0	39385	9055500000	86	30.7011	30.8903	29.9617	30.1699	Q4CVT7
+	1.33397	-0.737288	Q4CMR1	>tr|Q4CMR1|Q4CMR1_TRYCC Uncharacterized protein (Fragment) OS=Trypanosoma cruzi (strain CL Brener) GN=Tc00.1047053509577.9 PE=4 SV=1;>tr|Q4D6C5|Q4D6C5_TRYCC Uncharacterized protein (Fragment) OS=Trypanosoma cruzi (strain CL Brener) GN=Tc00.1047053506673.69	3	18	492410000	802180000	381750000	786420000	0.599349	5	5	1	171	171	36	12661	0	13318	2961300000	55	29.154	28.9064	28.1846	28.4013	Q4CMR1
+	1.43579	-0.745232	Q4DI29	>tr|Q4DI29|Q4DI29_TRYCC Superoxide dismutase OS=Trypanosoma cruzi (strain CL Brener) GN=Tc00.1047053511019.90 PE=1 SV=1;>tr|Q4D4J5|Q4D4J5_TRYCC Superoxide dismutase OS=Trypanosoma cruzi (strain CL Brener) GN=Tc00.1047053508445.20 PE=3 SV=1	2	16	1827300000	2595200000	933650000	1679000000	0.594371	5	5	1	323	323	72	21905	0	15638	10838000000	83	30.8745	30.6027	30.0487	29.938	Q4DI29
+	1.12757	-0.753461	Q4D6B1	>tr|Q4D6B1|Q4D6B1_TRYCC Uncharacterized protein OS=Trypanosoma cruzi (strain CL Brener) GN=Tc00.1047053508269.40 PE=4 SV=1	1	29	181400000	203360000	77583000	148970000	0.597468	8	1	1	231	34	34	4309	37112	1694	878380000	10	27.4745	27.2876	26.8247	26.4305	Q4D6B1
+	1.42613	-0.754515	Q4CS05	>tr|Q4CS05|Q4CS05_TRYCC Flagellar calcium-binding protein, putative OS=Trypanosoma cruzi (strain CL Brener) GN=Tc00.1047053506749.20 PE=4 SV=1;>tr|Q4CTX2|Q4CTX2_TRYCC Flagellar calcium-binding protein, putative OS=Trypanosoma cruzi (strain CL Brener) GN=Tc	3	33	15806000000	17657000000	9394400000	12651000000	0.593145	9	9	2	431	431	66	23819	0	14015	80417000000	239	33.9097	33.7108	33.1685	32.943	Q4CS05
+	1.66118	-0.757789	Q4E657	>sp|Q4E657|PFKA_TRYCC ATP-dependent 6-phosphofructokinase OS=Trypanosoma cruzi (strain CL Brener) GN=pfk PE=1 SV=1	1	25	1208900000	1294900000	1009700000	1171700000	0.592575	7	7	7	20	20	20	53565	0	69414	5737200000	68	30.1974	30.1005	29.2882	29.4941	Q4E657
+	1.20434	-0.766807	Q4CKG3	>tr|Q4CKG3|Q4CKG3_TRYCC Microtubule-associated protein Gb4, putative (Fragment) OS=Trypanosoma cruzi (strain CL Brener) GN=Tc00.1047053441241.10 PE=4 SV=1	1	8	507060000	558120000	249970000	444010000	0.584403	2	2	2	119	119	119	46224	0	1237	2854100000	31	29.0445	28.6865	28.0068	28.1905	Q4CKG3
+	1.21709	-0.767025	Q4DC80	>tr|Q4DC80|Q4DC80_TRYCC Glycerol-3-phosphate dehydrogenase OS=Trypanosoma cruzi (strain CL Brener) GN=Tc00.1047053511151.90 PE=3 SV=1	1	31	952020000	1720400000	591930000	1447900000	0.582377	10	10	9	194	194	177	67126	0	12314	6084500000	93	29.8406	30.2323	29.2399	29.2989	Q4DC80
+	2.71866	-0.771486	Q4E3S1	>tr|Q4E3S1|Q4E3S1_TRYCC Electron transfer flavoprotein-ubiquinone oxidoreductase, putative OS=Trypanosoma cruzi (strain CL Brener) GN=Tc00.1047053506401.220 PE=4 SV=1;>tr|Q4DSI7|Q4DSI7_TRYCC Electron transfer flavoprotein-ubiquinone oxidoreductase, putativ	2	20	341170000	473170000	179530000	380220000	0.585657	6	6	6	129	129	129	62379	0	18896	1795700000	39	28.3068	28.374	27.5726	27.5652	Q4E3S1
+	1.27916	-0.771681	Q4CPZ0	>tr|Q4CPZ0|Q4CPZ0_TRYCC Calreticulin, putative OS=Trypanosoma cruzi (strain CL Brener) GN=Tc00.1047053510685.10 PE=1 SV=1	4	61	866720000	1073600000	495380000	717640000	0.584261	17	5	5	469	92	92	46234	0	55713	4441200000	43	29.7618	29.4636	28.7327	28.9493	Q4CPZ0
+	1.09441	-0.776659	Q4D0Q5	>tr|Q4D0Q5|Q4D0Q5_TRYCC Uncharacterized protein OS=Trypanosoma cruzi (strain CL Brener) GN=Tc00.1047053509571.50 PE=4 SV=1;>tr|Q4D2A4|Q4D2A4_TRYCC Uncharacterized protein OS=Trypanosoma cruzi (strain CL Brener) GN=Tc00.1047053511409.50 PE=4 SV=1	2	24	384240000	597210000	207030000	411070000	0.591245	8	8	8	215	215	215	58012	0	25048	2186900000	34	28.5877	28.6429	27.6056	28.0717	Q4D0Q5
+	1.6464	-0.781165	Q4D7J7	>tr|Q4D7J7|Q4D7J7_TRYCC Cytochrome P450, putative OS=Trypanosoma cruzi (strain CL Brener) GN=Tc00.1047053509719.40 PE=4 SV=1;>tr|Q4D0S6|Q4D0S6_TRYCC Cytochrome P450, putative OS=Trypanosoma cruzi (strain CL Brener) GN=Tc00.1047053509231.10 PE=4 SV=1	2	23	510770000	809000000	257590000	567270000	0.58355	6	6	6	141	141	141	65591	0	75718	2239500000	44	28.9163	28.986	28.0558	28.2842	Q4D7J7
+	1.64357	-0.785517	Q4E410	>tr|Q4E410|Q4E410_TRYCC Uncharacterized protein OS=Trypanosoma cruzi (strain CL Brener) GN=Tc00.1047053511127.90 PE=4 SV=1;>tr|Q4DRN7|Q4DRN7_TRYCC Uncharacterized protein OS=Trypanosoma cruzi (strain CL Brener) GN=Tc00.1047053509023.90 PE=4 SV=1	2	10	440250000	530940000	130490000	230780000	0.5794	3	3	3	144	144	144	3328	0	40653	1871900000	23	28.4758	28.2764	27.5229	27.6583	Q4E410
+	2.11105	-0.786989	Q4E5I9	>tr|Q4E5I9|Q4E5I9_TRYCC Alcohol dehydrogenase, putative OS=Trypanosoma cruzi (strain CL Brener) GN=Tc00.1047053511277.60 PE=4 SV=1	1	58	7372000000	9907900000	4151300000	6299600000	0.579423	16	16	1	426	426	36	41759	0	25748	42414000000	181	32.8897	32.7821	32.0932	32.0046	Q4E5I9
+	3.823	-0.792017	Q4CUG0	>tr|Q4CUG0|Q4CUG0_TRYCC Uncharacterized protein OS=Trypanosoma cruzi (strain CL Brener) GN=Tc00.1047053509713.10 PE=4 SV=1	1	14	638240000	803750000	343030000	585790000	0.577528	4	2	2	98	62	62	59301	0	14638	4586900000	56	29.2794	29.2617	28.4746	28.4826	Q4CUG0
+	1.99013	-0.792515	Q4E3Y5	>tr|Q4E3Y5|Q4E3Y5_TRYCC Uncharacterized protein OS=Trypanosoma cruzi (strain CL Brener) GN=Tc00.1047053511127.380 PE=4 SV=1;>tr|Q4E3Y6|Q4E3Y6_TRYCC Uncharacterized protein OS=Trypanosoma cruzi (strain CL Brener) GN=Tc00.1047053511127.369 PE=4 SV=1	2	11	272340000	392280000	170960000	269770000	0.57786	3	3	2	59	59	42	98916	0	24281	1398100000	38	27.9807	27.9064	27.2228	27.0793	Q4E3Y5
+	1.95379	-0.793434	Q4DUK7	>tr|Q4DUK7|Q4DUK7_TRYCC Elongation of fatty acids protein OS=Trypanosoma cruzi (strain CL Brener) GN=Tc00.1047053511245.130 PE=3 SV=1;>tr|Q4DHY1|Q4DHY1_TRYCC Elongation of fatty acids protein OS=Trypanosoma cruzi (strain CL Brener) GN=Tc00.1047053506661.30	2	25	2140500000	2942300000	1094500000	2243000000	0.576393	8	8	8	426	426	426	32611	0	6538	10524000000	45	31.1733	31.0231	30.3433	30.2663	Q4DUK7
+	1.42637	-0.794457	Q4CVJ1	>tr|Q4CVJ1|Q4CVJ1_TRYCC Uncharacterized protein OS=Trypanosoma cruzi (strain CL Brener) GN=Tc00.1047053504199.20 PE=4 SV=1	1	20	1105200000	1119200000	602100000	866770000	0.575684	6	2	2	349	118	118	1636	0	43453	5752600000	54	30.0185	29.7679	29.1955	29.0021	Q4CVJ1
+	1.98819	-0.794853	Q4E124	>tr|Q4E124|Q4E124_TRYCC Uncharacterized protein OS=Trypanosoma cruzi (strain CL Brener) GN=Tc00.1047053506247.310 PE=3 SV=1	1	19	565030000	664780000	298510000	530590000	0.577046	5	5	5	465	465	465	12802	0	85535	2927900000	44	29.1303	29.068	28.2293	28.3793	Q4E124
+	1.48524	-0.824389	Q4DAZ9	>tr|Q4DAZ9|Q4DAZ9_TRYCC Uncharacterized protein OS=Trypanosoma cruzi (strain CL Brener) GN=Tc00.1047053510087.90 PE=4 SV=1	1	15	1087500000	1593700000	618040000	912510000	0.565437	5	5	5	294	294	294	30452	0	68315	6117600000	59	30.0129	30.2032	29.1639	29.4033	Q4DAZ9
+	1.13043	-0.837161	Q4DND9	>tr|Q4DND9|Q4DND9_TRYCC Uncharacterized protein OS=Trypanosoma cruzi (strain CL Brener) GN=Tc00.1047053504827.150 PE=4 SV=1;>tr|Q4DIS9|Q4DIS9_TRYCC Uncharacterized protein OS=Trypanosoma cruzi (strain CL Brener) GN=Tc00.1047053510285.80 PE=4 SV=1	2	28	6413500000	3381800000	3344900000	4263000000	0.559126	11	11	11	159	159	159	98623	0	32258	27080000000	53	32.5057	32.151	31.3273	31.655	Q4DND9
+	1.92924	-0.837898	Q4DIP8	>tr|Q4DIP8|Q4DIP8_TRYCC Uncharacterized protein OS=Trypanosoma cruzi (strain CL Brener) GN=Tc00.1047053506635.130 PE=4 SV=1	1	20	2831200000	3846500000	1578800000	2233100000	0.560466	6	6	2	349	349	118	16335	0	45324	16157000000	78	31.4175	31.3748	30.6474	30.4691	Q4DIP8
+	1.84915	-0.843216	Q4DF18	>tr|Q4DF18|Q4DF18_TRYCC Galactokinase-like protein, putative OS=Trypanosoma cruzi (strain CL Brener) GN=Tc00.1047053507001.110 PE=4 SV=1	1	40	444310000	646990000	84743000	263130000	0.557327	12	3	3	321	94	94	51903	0	33655	2011000000	32	28.6145	28.7616	27.7751	27.9146	Q4DF18
+	1.57594	-0.848286	Q4DWQ7	>tr|Q4DWQ7|Q4DWQ7_TRYCC Uncharacterized protein OS=Trypanosoma cruzi (strain CL Brener) GN=Tc00.1047053511421.50 PE=4 SV=1	1	13	395620000	368740000	181940000	350690000	0.556991	4	4	4	191	191	191	30335	0	7078	1606900000	16	28.2813	28.1524	27.2431	27.494	Q4DWQ7
+	2.60125	-0.849417	Q4DHQ7	>tr|Q4DHQ7|Q4DHQ7_TRYCC ABC transporter, putative OS=Trypanosoma cruzi (strain CL Brener) GN=Tc00.1047053510149.80 PE=4 SV=1	1	57	2019400000	3163500000	948810000	1684100000	0.555203	18	18	5	147	147	48	20656	0	57124	8956100000	127	30.911	30.8841	30.0077	30.0885	Q4DHQ7
+	1.91553	-0.849871	Q4D9V7	>tr|Q4D9V7|Q4D9V7_TRYCC Uncharacterized protein OS=Trypanosoma cruzi (strain CL Brener) GN=Tc00.1047053506681.40 PE=4 SV=1	1	30	90124000	116360000	53944000	90256000	0.555079	9	3	3	219	99	99	58229	0	33	483290000	27	26.4401	26.5593	25.5765	25.7232	Q4D9V7
+	1.32405	-0.855213	Q4CKH9	>tr|Q4CKH9|Q4CKH9_TRYCC Calpain-like cysteine peptidase, putative (Fragment) OS=Trypanosoma cruzi (strain CL Brener) GN=Tc00.1047053445281.9 PE=4 SV=1	1	17	464260000	554740000	168740000	346530000	0.55721	6	2	2	27	109	109	4862	0	1913	1969900000	37	28.6458	28.7354	28.0233	27.6475	Q4CKH9
+	2.51804	-0.856375	Q4E4Q2	>tr|Q4E4Q2|Q4E4Q2_TRYCC Gim5A protein, putative OS=Trypanosoma cruzi (strain CL Brener) GN=Tc00.1047053508461.570 PE=4 SV=1;>tr|Q4CR48|Q4CR48_TRYCC Gim5A protein, putative OS=Trypanosoma cruzi (strain CL Brener) GN=Tc00.1047053510669.20 PE=4 SV=1	2	59	31261000000	44978000000	17407000000	23891000000	0.552053	15	15	1	623	623	57	26605	0	22942	146200000000	236	34.8122	34.906	34.0088	33.9967	Q4E4Q2
+	1.01614	-0.866406	Q4DFK0	>tr|Q4DFK0|Q4DFK0_TRYCC Uncharacterized protein OS=Trypanosoma cruzi (strain CL Brener) GN=Tc00.1047053508723.70 PE=4 SV=1;>tr|Q4CZS0|Q4CZS0_TRYCC Uncharacterized protein (Fragment) OS=Trypanosoma cruzi (strain CL Brener) GN=Tc00.1047053509789.59 PE=4 SV=1	2	15	258050000	255780000	68539000	197030000	0.553873	6	6	6	46	46	46	24873	0	2903	1126700000	37	27.6854	27.9805	26.7165	27.2166	Q4DFK0
+	1.91265	-0.886854	Q4DAV2	>tr|Q4DAV2|Q4DAV2_TRYCC Amino acid transporter, putative OS=Trypanosoma cruzi (strain CL Brener) GN=Tc00.1047053504069.120 PE=4 SV=1;>tr|Q4DCW3|Q4DCW3_TRYCC Amino acid transporter, putative OS=Trypanosoma cruzi (strain CL Brener) GN=Tc00.1047053504229.110	2	12	245100000	340480000	115210000	177950000	0.54004	3	3	3	9	9	9	52776	0	23422	1109000000	23	27.7283	27.9048	26.9744	26.8849	Q4DAV2
+	1.63691	-0.891534	Q4DD65	>tr|Q4DD65|Q4DD65_TRYCC Uncharacterized protein OS=Trypanosoma cruzi (strain CL Brener) GN=Tc00.1047053503975.100 PE=4 SV=1	2	41	853430000	768800000	430180000	747210000	0.536705	14	14	6	101	101	39	20105	0	15708	4263600000	98	29.7594	29.487	28.7105	28.7528	Q4DD65
+	1.50955	-0.918584	Q4CWN9	>tr|Q4CWN9|Q4CWN9_TRYCC Kinesin-like protein, putative (Fragment) OS=Trypanosoma cruzi (strain CL Brener) GN=Tc00.1047053511253.31 PE=3 SV=1;>tr|Q4CNB2|Q4CNB2_TRYCC Myosin heavy chain, putative (Fragment) OS=Trypanosoma cruzi (strain CL Brener) GN=Tc00.104	5	17	2497500000	3821700000	1469500000	3077700000	0.531033	5	5	5	223	223	223	15904	0	12109	11793000000	31	31.3586	31.5108	30.3692	30.663	Q4CWN9
+	1.22458	-0.924534	Q4CVA9	>tr|Q4CVA9|Q4CVA9_TRYCC Histone H1, putative OS=Trypanosoma cruzi (strain CL Brener) GN=Tc00.1047053509837.40 PE=4 SV=1	1	8	1025100000	1294900000	964100000	1296200000	0.53394	2	2	2	5	5	5	21152	11157	22859	6601100000	38	30.3478	30.3404	29.656	29.1832	Q4CVA9
+	1.38243	-0.992824	Q4CQJ6	>tr|Q4CQJ6|Q4CQJ6_TRYCC Transmembrane 9 superfamily member OS=Trypanosoma cruzi (strain CL Brener) GN=Tc00.1047053507251.30 PE=3 SV=1;>tr|Q4DED3|Q4DED3_TRYCC Transmembrane 9 superfamily member OS=Trypanosoma cruzi (strain CL Brener) GN=Tc00.1047053506405.1	2	4	164620000	270160000	94196000	111270000	0.497996	1	1	1	36	36	36	39813	0	27992	816740000	15	27.1927	27.5955	26.456	26.3465	Q4CQJ6
+	1.48715	-1.00011	Q4E2I4	>tr|Q4E2I4|Q4E2I4_TRYCC Uncharacterized protein OS=Trypanosoma cruzi (strain CL Brener) GN=Tc00.1047053508479.360 PE=4 SV=1	1	8	275410000	316410000	121070000	182460000	0.501774	2	2	2	34	34	34	69131	0	68151	1308900000	38	28.0912	27.8956	27.1503	26.8362	Q4E2I4
+	1.9641	-1.00893	Q4DZF8	>tr|Q4DZF8|Q4DZF8_TRYCC Uncharacterized protein OS=Trypanosoma cruzi (strain CL Brener) GN=Tc00.1047053506825.40 PE=4 SV=1	1	29	574000000	726980000	211880000	441150000	0.498179	9	9	3	219	219	99	58156	0	50944	2868100000	59	28.9929	29.0286	27.8973	28.1063	Q4DZF8
+	1.27374	-1.03631	Q4DX81	>tr|Q4DX81|Q4DX81_TRYCC Cytochrome p450-like protein, putative OS=Trypanosoma cruzi (strain CL Brener) GN=Tc00.1047053506945.190 PE=3 SV=1	1	18	366700000	441330000	332320000	333650000	0.488454	6	6	6	19	19	19	57271	0	17554	1551000000	38	28.716	28.3857	27.7011	27.3279	Q4DX81
+	1.63725	-1.04501	Q4CNM1	>tr|Q4CNM1|Q4CNM1_TRYCC Uncharacterized protein OS=Trypanosoma cruzi (strain CL Brener) GN=Tc00.1047053458015.4 PE=4 SV=1	2	15	310840000	375490000	202270000	106610000	0.48565	5	5	5	246	246	246	30411	0	53851	1194000000	31	28.0396	28.2261	27.2197	26.956	Q4CNM1
+	1.13126	-1.04989	Q4CXD0	>tr|Q4CXD0|Q4CXD0_TRYCC Uncharacterized protein OS=Trypanosoma cruzi (strain CL Brener) GN=Tc00.1047053506695.40 PE=4 SV=1;>tr|Q4E636|Q4E636_TRYCC Uncharacterized protein OS=Trypanosoma cruzi (strain CL Brener) GN=Tc00.1047053508153.560 PE=4 SV=1	2	9	109400000	133760000	52277000	87675000	0.479992	3	3	3	133	133	133	28432	0	17402	673030000	26	26.7566	27.2418	26.13	25.7687	Q4CXD0
+	2.09534	-1.06187	Q4DA08	>tr|Q4DA08|Q4DA08_TRYCC Lysophospholipase, putative OS=Trypanosoma cruzi (strain CL Brener) GN=Tc00.1047053506797.70 PE=4 SV=1;>tr|Q4DY82|Q4DY82_TRYCC Lysophospholipase, putative OS=Trypanosoma cruzi (strain CL Brener) GN=Tc00.1047053511907.50 PE=4 SV=1	2	15	323590000	402010000	120090000	331400000	0.478411	4	4	4	139	139	139	30289	0	39608	1600000000	17	28.4074	28.2379	27.2163	27.3052	Q4DA08
+	2.86074	-1.09274	Q4CT11	>tr|Q4CT11|Q4CT11_TRYCC Uncharacterized protein (Fragment) OS=Trypanosoma cruzi (strain CL Brener) GN=Tc00.1047053509913.30 PE=4 SV=1	1	13	145830000	135550000	26863000	62192000	0.469024	4	4	3	65	65	5	11455	0	52484	546420000	33	26.8606	26.8847	25.8187	25.7412	Q4CT11
+	2.03251	-1.19467	Q4DSW8	>tr|Q4DSW8|Q4DSW8_TRYCC Mitotubule-associated protein Gb4, putative (Fragment) OS=Trypanosoma cruzi (strain CL Brener) GN=Tc00.1047053508347.159 PE=4 SV=1	1	27	537050000	600090000	175160000	249860000	0.438084	9	9	0	181	181	0	13741	0	19845	2350100000	52	28.9761	28.9123	27.8609	27.6381	Q4DSW8
+	1.9616	-1.20247	Q4DZJ3	>tr|Q4DZJ3|Q4DZJ3_TRYCC Aminopeptidase, putative OS=Trypanosoma cruzi (strain CL Brener) GN=Tc00.1047053508799.240 PE=4 SV=1	1	39	1569900000	2581900000	808060000	1463600000	0.434416	12	12	12	308	308	308	55891	0	24316	8559700000	83	30.652	30.8373	29.6286	29.4557	Q4DZJ3
+	2.75708	-1.25653	Q4DSA0	>tr|Q4DSA0|Q4DSA0_TRYCC Arginase, putative OS=Trypanosoma cruzi (strain CL Brener) GN=Tc00.1047053507031.90 PE=1 SV=1	1	54	2692700000	3825600000	958490000	1270100000	0.418538	15	15	4	643	643	224	33556	0	14604	13175000000	181	31.2502	31.3263	29.9954	30.068	Q4DSA0
+	1.22128	-1.51373	Q4DAR1	>tr|Q4DAR1|Q4DAR1_TRYCC Uncharacterized protein OS=Trypanosoma cruzi (strain CL Brener) GN=Tc00.1047053503925.6 PE=4 SV=1	1	12	1529100000	2483900000	701470000	1262800000	0.362958	3	3	2	302	302	151	99073	0	11711	8149500000	139	30.0393	30.0092	28.899	28.122	Q4DAR1
+	1.50548	-1.64628	Q4E256	>tr|Q4E256|Q4E256_TRYCC Nucleoside diphosphate kinase OS=Trypanosoma cruzi (strain CL Brener) GN=Tc00.1047053508707.200 PE=1 SV=1	1	15	492040000	679890000	92229000	137080000	0.326171	5	5	5	412	412	412	16878	0	32331	1872600000	37	28.77	28.8274	27.449	26.8559	Q4E256
+	1.29419	-1.95445	Q4CVA1	>tr|Q4CVA1|Q4CVA1_TRYCC Proline dehydrogenase OS=Trypanosoma cruzi (strain CL Brener) GN=Tc00.1047053506411.30 PE=3 SV=1	1	9	348440000	324900000	32402000	214930000	0.266234	3	3	3	71	71	71	64796	0	16497	1686800000	28	28.3681	27.9751	25.8034	26.631	Q4CVA1
