# Supplementary material for: Proteome-Wide Analysis of Trypanosoma cruzi Exponential and Stationary Growth Phases Reveals a Subcellular Compartment-Specific Regulation
Source: Genes (Basel). 2018 Aug 15;9(8):413. doi: 10.3390/genes9080413 (PMC6115888; doi:10.3390/genes9080413)
Supplement: Supplementary file 1 [file genes-09-00413-s001.zip › Supplementary Table 3.xlsx]

## Sheet: Foglio1
Type	Protein Ids	Majority protein IDs	Peptide counts (all)	Peptide counts (razor+unique)	Peptide counts (unique)	Fasta headers	Number of proteins	Peptides	Razor + unique peptides	Unique peptides	Sum peptides	Peptides stationary 1	Peptides stationary 2	Peptides exponential 1	Peptides exponential 2	Razor + unique peptides stationary 1	Razor + unique peptides stationary 2	Razor + unique peptides exponential 1	Razor + unique peptides exponential 2	Unique peptides stationary 1	Unique peptides stationary 2	Unique peptides exponential 1	Unique peptides exponential 2	Sequence coverage [%]	Unique + razor sequence coverage [%]	Unique sequence coverage [%]	Mol. weight [kDa]	Sequence length	Sequence lengths	Fraction average	Fraction 1	Q-value	Score	Sequence coverage stationary 1 [%]	Sequence coverage stationary 2 [%]	Sequence coverage sample44 [%]	Sequence coverage sample45 [%]	Sequence coverage exponential 1 [%]	Sequence coverage exponential 2 [%]	Intensity	Intensity stationary 1	Intensity stationary 2	Intensity exponential 1	Intensity exponential 2	iBAQ	iBAQ stationary 1	iBAQ stationary 2	iBAQ42	iBAQ43
Stationary	tr|Q4CR45|Q4CR45_TRYCC	tr|Q4CR45|Q4CR45_TRYCC	13	2	2	>tr|Q4CR45|Q4CR45_TRYCC Gim5A protein, putative (Fragment) OS=Trypanosoma cruzi (strain CL Brener) GN=Tc00.1047053510669.49 PE=4 SV=1	1	13	2	2	49	13	12	12	12	2	2	1	1	2	2	1	1	68.9	11.2	11.2	17631	161	161	1	15	0	25801	68.9	68.9	63.4	68.9	63.4	63.4	558330000	155050000	196050000	20369000	38725000	42949000	11927000	15080000	0.00995293	0.00962464
Stationary	tr|Q4DSS0|Q4DSS0_TRYCC;tr|Q4D9W2|Q4D9W2_TRYCC;tr|Q4CLE7|Q4CLE7_TRYCC	tr|Q4DSS0|Q4DSS0_TRYCC	9;2;1	9;2;1	6;2;1	>tr|Q4DSS0|Q4DSS0_TRYCC Uncharacterized protein OS=Trypanosoma cruzi (strain CL Brener) GN=Tc00.1047053507809.110 PE=4 SV=1	3	9	9	6	16	3	2	4	7	3	2	4	7	2	1	3	4	8.9	8.9	6	145.46	1349	1349;161;236	1	31	0	11333	2.8	1.9	1.9	1.9	4	7.2	668170000	77940000	124730000	121550000	251470000	11136000	1299000	2078800	0.001084	0.00132677
Stationary	tr|Q4CQG0|Q4CQG0_TRYCC	tr|Q4CQG0|Q4CQG0_TRYCC	5	1	1	>tr|Q4CQG0|Q4CQG0_TRYCC 40S ribosomal protein S12 OS=Trypanosoma cruzi (strain CL Brener) GN=Tc00.1047053508551.20 PE=3 SV=1	1	5	1	1	16	3	3	5	5	1	1	1	1	1	1	1	1	51.4	13.4	13.4	15897	142	142	1	25	0	18252	27.5	27.5	27.5	19.7	51.4	51.4	2636000000	566990000	532000000	377440000	624560000	263600000	56699000	53200000	0.0473146	0.0339543
Stationary	tr|Q4D5P2|Q4D5P2_TRYCC	tr|Q4D5P2|Q4D5P2_TRYCC	5	5	3	>tr|Q4D5P2|Q4D5P2_TRYCC Uncharacterized protein OS=Trypanosoma cruzi (strain CL Brener) GN=Tc00.1047053511051.59 PE=4 SV=1	1	5	5	3	11	3	2	3	3	3	2	3	3	2	2	3	2	21.9	21.9	18	51031	456	456	1	20	0	86273	8.6	8.6	3.1	3.1	18	16.4	420700000	59027000	50493000	144710000	125970000	14507000	2035400	1741200	0.00169852	0.0011113
Stationary	tr|Q4DNZ4|Q4DNZ4_TRYCC	tr|Q4DNZ4|Q4DNZ4_TRYCC	3	3	2	>tr|Q4DNZ4|Q4DNZ4_TRYCC Adenine phosphoribosyltransferase, putative OS=Trypanosoma cruzi (strain CL Brener) GN=Tc00.1047053507519.140 PE=4 SV=1	1	3	3	2	9	2	2	2	3	2	2	2	3	2	2	1	2	20	20	13.6	25883	235	235	1	21	0	20.64	13.6	13.6	5.5	13.6	11.9	20	993680000	245470000	163610000	137500000	312200000	90335000	22315000	14874000	0.0186216	0.00949316
Stationary	tr|Q4D4N1|Q4D4N1_TRYCC;tr|Q4D0U0|Q4D0U0_TRYCC;tr|Q4CPN8|Q4CPN8_TRYCC;tr|Q4CTY1|Q4CTY1_TRYCC;tr|Q4CNJ4|Q4CNJ4_TRYCC;tr|Q4CL60|Q4CL60_TRYCC;tr|Q4CTQ2|Q4CTQ2_TRYCC;tr|Q4CRI2|Q4CRI2_TRYCC;tr|Q4D2H9|Q4D2H9_TRYCC;tr|Q4D5D1|Q4D5D1_TRYCC;tr|Q4D3C9|Q4D3C9_TRYCC;tr|Q4D2I0|Q4D2I0_TRYCC;tr|Q4CU29|Q4CU29_TRYCC;tr|Q4CNM7|Q4CNM7_TRYCC	tr|Q4D4N1|Q4D4N1_TRYCC;tr|Q4D0U0|Q4D0U0_TRYCC;tr|Q4CPN8|Q4CPN8_TRYCC;tr|Q4CTY1|Q4CTY1_TRYCC;tr|Q4CNJ4|Q4CNJ4_TRYCC	3;3;2;2;2;1;1;1;1;1;1;1;1;1	2;2;1;1;1;0;0;0;0;0;0;0;0;0	0;0;0;0;0;0;0;0;0;0;0;0;0;0	>tr|Q4D4N1|Q4D4N1_TRYCC Hexosyltransferase OS=Trypanosoma cruzi (strain CL Brener) GN=Tc00.1047053504557.10 PE=3 SV=1;>tr|Q4D0U0|Q4D0U0_TRYCC Hexosyltransferase OS=Trypanosoma cruzi (strain CL Brener) GN=Tc00.1047053508193.60 PE=3 SV=1;>tr|Q4CPN8|Q4CPN8_TR	14	3	2	0	9	2	3	2	2	2	2	1	1	0	0	0	0	9.7	6.3	0	43028	381	381;394;290;377;377;164;193;193;314;377;377;377;377;377	1	18	0	11875	6.3	9.7	9.7	9.7	7.1	7.1	761220000	155230000	194280000	83932000	116270000	33096000	6749200	8447000	0.00563212	0.0053912
Stationary	tr|Q4CV29|Q4CV29_TRYCC;tr|Q4CNF3|Q4CNF3_TRYCC;tr|Q4CKW2|Q4CKW2_TRYCC	tr|Q4CV29|Q4CV29_TRYCC;tr|Q4CNF3|Q4CNF3_TRYCC;tr|Q4CKW2|Q4CKW2_TRYCC	3;3;3	3;3;3	3;3;3	>tr|Q4CV29|Q4CV29_TRYCC ADP-ribosylation factor, putative OS=Trypanosoma cruzi (strain CL Brener) GN=Tc00.1047053509297.30 PE=3 SV=1;>tr|Q4CNF3|Q4CNF3_TRYCC ADP-ribosylation factor, putative OS=Trypanosoma cruzi (strain CL Brener) GN=Tc00.1047053508197.20	3	3	3	3	8	1	1	3	3	1	1	3	3	1	1	3	3	21.7	21.7	21.7	21235	189	189;189;192	1	27	0	59986	6.9	6.9	6.9	6.9	21.7	21.7	1666300000	252890000	435670000	170800000	343990000	151480000	22990000	39607000	0.0191849	0.0252787
Stationary	tr|Q4DA10|Q4DA10_TRYCC;tr|Q4DY84|Q4DY84_TRYCC	tr|Q4DA10|Q4DA10_TRYCC;tr|Q4DY84|Q4DY84_TRYCC	3;2	3;2	3;2	>tr|Q4DA10|Q4DA10_TRYCC Uncharacterized protein OS=Trypanosoma cruzi (strain CL Brener) GN=Tc00.1047053506797.50 PE=4 SV=1;>tr|Q4DY84|Q4DY84_TRYCC Uncharacterized protein OS=Trypanosoma cruzi (strain CL Brener) GN=Tc00.1047053511907.30 PE=4 SV=1	2	3	3	3	7	2	2	2	1	2	2	2	1	2	2	2	1	7.4	7.4	7.4	46908	419	419;419	1	14	0.0021755	21367	4.8	4.8	4.8	4.8	5	2.6	244590000	31135000	72928000	50514000	21631000	9058900	1153200	2701000	0.000962331	0.00172388
Stationary	tr|Q4DJ37|Q4DJ37_TRYCC;tr|Q4DUX2|Q4DUX2_TRYCC	tr|Q4DJ37|Q4DJ37_TRYCC;tr|Q4DUX2|Q4DUX2_TRYCC	3;3	3;3	3;3	>tr|Q4DJ37|Q4DJ37_TRYCC Uncharacterized protein OS=Trypanosoma cruzi (strain CL Brener) GN=Tc00.1047053511239.80 PE=4 SV=1;>tr|Q4DUX2|Q4DUX2_TRYCC Uncharacterized protein OS=Trypanosoma cruzi (strain CL Brener) GN=Tc00.1047053506605.90 PE=4 SV=1	2	3	3	3	6	2	2	1	1	2	2	1	1	2	2	1	1	8.7	8.7	8.7	47891	415	415;416	1	17	0	98769	6.5	6.5	6.5	8.7	2.7	2.7	303370000	67363000	92167000	21375000	27174000	10835000	2405800	3291700	0.00200761	0.00210089
Stationary	tr|Q4D5L4|Q4D5L4_TRYCC	tr|Q4D5L4|Q4D5L4_TRYCC	3	3	3	>tr|Q4D5L4|Q4D5L4_TRYCC Uncharacterized protein OS=Trypanosoma cruzi (strain CL Brener) GN=Tc00.1047053508839.20 PE=4 SV=1	1	3	3	3	6	2	3	1	0	2	3	1	0	2	3	1	0	8.5	8.5	8.5	48489	425	425	1	14	0	54556	8.5	8.5	8.5	8.5	3.8	0	288390000	68548000	55831000	21341000	0	9612900	2284900	1861000	0.00190672	0.00118776
Stationary	tr|Q4DS49|Q4DS49_TRYCC	tr|Q4DS49|Q4DS49_TRYCC	3	3	3	>tr|Q4DS49|Q4DS49_TRYCC Phosphatidylinositol 3-kinase, putative (Fragment) OS=Trypanosoma cruzi (strain CL Brener) GN=Tc00.1047053506475.14 PE=4 SV=1	1	3	3	3	3	1	1	0	1	1	1	0	1	1	1	0	1	2.4	2.4	2.4	210.8	1898	1898	1	15	0.0039669	15708	0.9	0.9	1.5	0.9	0	0.9	680320000	61997000	103340000	0	0	5967700	543830	906490	0.000453819	0.000578557
Stationary	tr|Q4CYH9|Q4CYH9_TRYCC;tr|Q4DYB1|Q4DYB1_TRYCC;tr|Q4DYB0|Q4DYB0_TRYCC;tr|Q4DYA8|Q4DYA8_TRYCC;tr|Q4CYH8|Q4CYH8_TRYCC	tr|Q4CYH9|Q4CYH9_TRYCC;tr|Q4DYB1|Q4DYB1_TRYCC;tr|Q4DYB0|Q4DYB0_TRYCC;tr|Q4DYA8|Q4DYA8_TRYCC;tr|Q4CYH8|Q4CYH8_TRYCC	2;2;2;2;2	1;1;1;1;1	1;1;1;1;1	>tr|Q4CYH9|Q4CYH9_TRYCC Histone H2A (Fragment) OS=Trypanosoma cruzi (strain CL Brener) GN=Tc00.1047053508321.11 PE=3 SV=1;>tr|Q4DYB1|Q4DYB1_TRYCC Histone H2A OS=Trypanosoma cruzi (strain CL Brener) GN=Tc00.1047053511817.151 PE=3 SV=1;>tr|Q4DYB0|Q4DYB0_TRYC	5	2	1	1	8	2	2	2	2	1	1	1	1	1	1	1	1	17.8	9.3	9.3	11463	107	107;135;135;135;135	1	30	0	32909	17.8	17.8	17.8	17.8	17.8	17.8	38798000000	4683900000	10900000000	6147900000	9261500000	6466300000	780660000	1816600000	0.651451	1.15942
Stationary	tr|Q4D487|Q4D487_TRYCC	tr|Q4D487|Q4D487_TRYCC	2	2	1	>tr|Q4D487|Q4D487_TRYCC Uncharacterized protein OS=Trypanosoma cruzi (strain CL Brener) GN=Tc00.1047053509317.80 PE=4 SV=1	1	2	2	1	6	2	2	1	1	2	2	1	1	1	1	0	0	14	14	4.9	16198	143	143	1	16	0	13865	14	14	9.1	14	9.1	9.1	754390000	145720000	196700000	83543000	104690000	125730000	24286000	32784000	0.0202664	0.020924
Stationary	tr|Q4DLW6|Q4DLW6_TRYCC;tr|Q4DBV0|Q4DBV0_TRYCC	tr|Q4DLW6|Q4DLW6_TRYCC;tr|Q4DBV0|Q4DBV0_TRYCC	2;2	2;2	2;2	>tr|Q4DLW6|Q4DLW6_TRYCC Uncharacterized protein OS=Trypanosoma cruzi (strain CL Brener) GN=Tc00.1047053506753.240 PE=4 SV=1;>tr|Q4DBV0|Q4DBV0_TRYCC Uncharacterized protein OS=Trypanosoma cruzi (strain CL Brener) GN=Tc00.1047053510357.140 PE=4 SV=1	2	2	2	2	6	2	2	1	1	2	2	1	1	2	2	1	1	13	13	13	21737	192	192;208	1	14	0	47143	13	13	8.3	8.3	8.3	8.3	660460000	205600000	356120000	13684000	40260000	66046000	20560000	35612000	0.0171571	0.022729
Stationary	tr|Q4DGB1|Q4DGB1_TRYCC	tr|Q4DGB1|Q4DGB1_TRYCC	2	2	2	>tr|Q4DGB1|Q4DGB1_TRYCC Glutaredoxin, putative OS=Trypanosoma cruzi (strain CL Brener) GN=Tc00.1047053506475.116 PE=4 SV=1	1	2	2	2	6	2	2	1	1	2	2	1	1	2	2	1	1	20.6	20.6	20.6	12.33	107	107	1	14	0	33394	20.6	20.6	20.6	20.6	8.4	8.4	292080000	67834000	72448000	29817000	44601000	32453000	7537100	8049800	0.00628962	0.0051377
Stationary	tr|Q4E0W6|Q4E0W6_TRYCC;tr|Q4CKK5|Q4CKK5_TRYCC	tr|Q4E0W6|Q4E0W6_TRYCC;tr|Q4CKK5|Q4CKK5_TRYCC	2;1	2;1	2;1	>tr|Q4E0W6|Q4E0W6_TRYCC Uncharacterized protein OS=Trypanosoma cruzi (strain CL Brener) GN=Tc00.1047053508277.320 PE=4 SV=1;>tr|Q4CKK5|Q4CKK5_TRYCC Uncharacterized protein (Fragment) OS=Trypanosoma cruzi (strain CL Brener) GN=Tc00.1047053404073.10 PE=4 SV=	2	2	2	2	6	2	2	1	1	2	2	1	1	2	2	1	1	9.1	9.1	9.1	33879	296	296;122	1	10	0.0052339	15042	9.1	9.1	4.4	4.4	4.4	4.4	324690000	95499000	60813000	54291000	53360000	15461000	4547600	2895900	0.00379492	0.00184828
Stationary	tr|Q4D4I8|Q4D4I8_TRYCC	tr|Q4D4I8|Q4D4I8_TRYCC	2	2	2	>tr|Q4D4I8|Q4D4I8_TRYCC Uncharacterized protein OS=Trypanosoma cruzi (strain CL Brener) GN=Tc00.1047053508445.90 PE=4 SV=1	1	2	2	2	6	2	2	1	1	2	2	1	1	2	2	1	1	4.3	4.3	4.3	69662	608	608	1	19	0	79334	4.3	4.3	4.3	4.3	2.6	2.6	220880000	36422000	53047000	26777000	0	6693400	1103700	1607500	0.000921024	0.00102597
Stationary	tr|Q4CT56|Q4CT56_TRYCC	tr|Q4CT56|Q4CT56_TRYCC	2	2	2	>tr|Q4CT56|Q4CT56_TRYCC Uncharacterized protein (Fragment) OS=Trypanosoma cruzi (strain CL Brener) GN=Tc00.1047053504019.3 PE=4 SV=1	1	2	2	2	6	2	2	1	1	2	2	1	1	2	2	1	1	34.7	34.7	34.7	205.66	1814	1814	1	16	0	21375	34.7	34.7	34.7	25.5	25.5	25.5	333950000	91741000	114430000	9837600	51824000	2650400	728110	908150	0.000607599	0.000579617
Stationary	tr|Q4DW34|Q4DW34_TRYCC	tr|Q4DW34|Q4DW34_TRYCC	2	2	2	>tr|Q4DW34|Q4DW34_TRYCC Serine carboxypeptidase S28, putative OS=Trypanosoma cruzi (strain CL Brener) GN=Tc00.1047053507681.200 PE=4 SV=1	1	2	2	2	6	2	2	1	1	2	2	1	1	2	2	1	1	4.3	4.3	4.3	53808	483	483	1	11	0.008312	13713	4.3	4.3	4.3	4.3	2.1	2.3	116130000	14879000	21318000	1000900	31717000	5278600	676310	968990	0.000564372	0.000618447
Stationary	tr|Q4CP37|Q4CP37_TRYCC	tr|Q4CP37|Q4CP37_TRYCC	2	2	2	>tr|Q4CP37|Q4CP37_TRYCC RNA-binding protein 4, putative OS=Trypanosoma cruzi (strain CL Brener) GN=Tc00.1047053508901.20 PE=4 SV=1	1	2	2	2	5	2	2	1	0	2	2	1	0	2	2	1	0	3.5	3.5	3.5	52273	489	489	1	13	0	35713	3.5	3.5	3.5	3.5	3.3	0	558130000	156580000	250170000	34791000	0	37209000	10439000	16678000	0.00871122	0.0106445
Stationary	tr|Q4DEL9|Q4DEL9_TRYCC;tr|Q4CZT2|Q4CZT2_TRYCC	tr|Q4DEL9|Q4DEL9_TRYCC;tr|Q4CZT2|Q4CZT2_TRYCC	2;1	2;1	2;1	>tr|Q4DEL9|Q4DEL9_TRYCC Uncharacterized protein OS=Trypanosoma cruzi (strain CL Brener) GN=Tc00.1047053507941.60 PE=4 SV=1;>tr|Q4CZT2|Q4CZT2_TRYCC Uncharacterized protein OS=Trypanosoma cruzi (strain CL Brener) GN=Tc00.1047053509985.20 PE=4 SV=1	2	2	2	2	5	2	2	0	1	2	2	0	1	2	2	0	1	7.7	7.7	7.7	48065	444	444;445	1	12	0	70959	7.7	7.7	4.1	7.7	0	3.6	946510000	340470000	140380000	0	38726000	47325000	17023000	7019100	0.0142055	0.00447986
Stationary	tr|Q4DYR0|Q4DYR0_TRYCC	tr|Q4DYR0|Q4DYR0_TRYCC	2	2	2	>tr|Q4DYR0|Q4DYR0_TRYCC Uncharacterized protein OS=Trypanosoma cruzi (strain CL Brener) GN=Tc00.1047053507641.150 PE=4 SV=1	1	2	2	2	5	2	2	1	0	2	2	1	0	2	2	1	0	5.5	5.5	5.5	49742	434	434	1	14	0	34992	5.5	5.5	3	3	3	0	313700000	84792000	146520000	33339000	0	9226500	2493900	4309300	0.00208113	0.00275036
Stationary	tr|Q4DSL3|Q4DSL3_TRYCC;tr|Q4CMS9|Q4CMS9_TRYCC	tr|Q4DSL3|Q4DSL3_TRYCC;tr|Q4CMS9|Q4CMS9_TRYCC	2;1	2;1	2;1	>tr|Q4DSL3|Q4DSL3_TRYCC Carnitine O-acetyltransferase, putative OS=Trypanosoma cruzi (strain CL Brener) GN=Tc00.1047053511303.40 PE=4 SV=1;>tr|Q4CMS9|Q4CMS9_TRYCC Uncharacterized protein (Fragment) OS=Trypanosoma cruzi (strain CL Brener) GN=Tc00.1047053511	2	2	2	2	4	1	1	1	1	1	1	1	1	1	1	1	1	4.3	4.3	4.3	82316	729	729;445	1	20	0	43195	2.1	2.1	2.1	4.3	2.1	2.1	187380000	26449000	51861000	0	9292900	3824100	539780	1058400	0.00045044	0.000675512
Stationary	tr|Q4DV78|Q4DV78_TRYCC	tr|Q4DV78|Q4DV78_TRYCC	1	1	1	>tr|Q4DV78|Q4DV78_TRYCC Uncharacterized protein OS=Trypanosoma cruzi (strain CL Brener) GN=Tc00.1047053508173.84 PE=4 SV=1	1	1	1	1	4	1	1	1	1	1	1	1	1	1	1	1	1	7.3	7.3	7.3	26536	232	232	1	18	0	3573	7.3	7.3	7.3	7.3	7.3	7.3	396870000	100140000	89212000	34177000	42785000	49608000	12517000	11152000	0.0104453	0.00711764
Stationary	tr|Q4DRY8|Q4DRY8_TRYCC	tr|Q4DRY8|Q4DRY8_TRYCC	1	1	1	>tr|Q4DRY8|Q4DRY8_TRYCC Uncharacterized protein OS=Trypanosoma cruzi (strain CL Brener) GN=Tc00.1047053508307.70 PE=4 SV=1	1	1	1	1	3	1	1	1	0	1	1	1	0	1	1	1	0	7.7	7.7	7.7	36948	324	324	1	11	0	39104	7.7	7.7	7.7	7.7	7.7	0	225260000	33884000	114620000	21999000	0	13251000	1993200	6742200	0.0016633	0.00430313
Exponential	tr|Q4CLT3|Q4CLT3_TRYCC	tr|Q4CLT3|Q4CLT3_TRYCC	17	1	1	>tr|Q4CLT3|Q4CLT3_TRYCC Uncharacterized protein OS=Trypanosoma cruzi (strain CL Brener) GN=Tc00.1047053509129.10 PE=4 SV=1	1	17	1	1	66	17	16	16	17	1	1	1	1	1	1	1	1	64.7	8.1	8.1	29628	272	272	1	14	0	60659	64.7	62.1	64.7	61.8	62.1	64.7	491170000	94077000	39689000	125880000	102420000	25851000	4951400	2088900	0.00413188	0.00133322
Exponential	tr|Q4E501|Q4E501_TRYCC	tr|Q4E501|Q4E501_TRYCC	17	3	3	>tr|Q4E501|Q4E501_TRYCC Uncharacterized protein OS=Trypanosoma cruzi (strain CL Brener) GN=Tc00.1047053508873.420 PE=4 SV=1	1	17	3	3	56	13	11	16	16	1	1	3	3	1	1	3	3	41.2	10.5	10.5	65021	590	590	1	18	0	38491	31.4	27.3	26.6	23.4	38.8	38.8	760450000	69732000	67588000	220090000	376720000	19011000	1743300	1689700	0.00145476	0.00107843
Exponential	tr|Q4D6P2|Q4D6P2_TRYCC	tr|Q4D6P2|Q4D6P2_TRYCC	16	1	1	>tr|Q4D6P2|Q4D6P2_TRYCC Regulatory subunit of protein kinase a-like protein, putative OS=Trypanosoma cruzi (strain CL Brener) GN=Tc00.1047053504013.60 PE=4 SV=1	1	16	1	1	47	10	9	13	15	0	0	1	1	0	0	1	1	31.4	2.3	2.3	62.8	558	558	1	6	0	29755	19.9	18.6	16.1	15.6	25.4	28.3	384520000	0	0	144860000	239670000	10986000	0	0
Exponential	tr|Q4DI33|Q4DI33_TRYCC;tr|Q4DEK7|Q4DEK7_TRYCC	tr|Q4DI33|Q4DI33_TRYCC	15;4	1;0	1;0	>tr|Q4DI33|Q4DI33_TRYCC Retrotransposon hot spot (RHS) protein, putative (Fragment) OS=Trypanosoma cruzi (strain CL Brener) GN=Tc00.1047053511019.13 PE=4 SV=1	2	15	1	1	48	11	12	12	13	1	1	1	1	1	1	1	1	29.8	2.5	2.5	58581	516	516;916	1	14	0	79233	23.4	26	22.5	19.6	26.4	26.7	495710000	20405000	96423000	155490000	177570000	13770000	566790	2678400	0.000472979	0.00170946
Exponential	tr|Q4CKM6|Q4CKM6_TRYCC	tr|Q4CKM6|Q4CKM6_TRYCC	14	3	3	>tr|Q4CKM6|Q4CKM6_TRYCC ATP-dependent DEAD/H RNA helicase, putative (Fragment) OS=Trypanosoma cruzi (strain CL Brener) GN=Tc00.1047053468941.9 PE=4 SV=1	1	14	3	3	45	9	10	13	13	0	0	3	3	0	0	3	3	42.7	7.7	7.7	51559	452	452	1	14	0	21923	28.8	31.4	27.9	27	42.7	39.2	114810000	0	0	44615000	70196000	4783800	0	0
Exponential	tr|Q4CUP4|Q4CUP4_TRYCC	tr|Q4CUP4|Q4CUP4_TRYCC	13	5	3	>tr|Q4CUP4|Q4CUP4_TRYCC Retrotransposon hot spot (RHS) protein, putative OS=Trypanosoma cruzi (strain CL Brener) GN=Tc00.1047053506047.20 PE=4 SV=1	1	13	5	3	36	7	7	12	10	1	1	5	3	1	1	3	2	27.6	13.1	6.5	69825	604	604	1	24	0	11341	12.1	12.7	12.6	8.6	26.3	20.7	726840000	47024000	34546000	286850000	358420000	17728000	1146900	842580	0.000957074	0.000537767
Exponential	tr|Q4DZZ4|Q4DZZ4_TRYCC	tr|Q4DZZ4|Q4DZZ4_TRYCC	13	3	3	>tr|Q4DZZ4|Q4DZZ4_TRYCC Prolyl-tRNA synthetase, putative OS=Trypanosoma cruzi (strain CL Brener) GN=Tc00.1047053509805.130 PE=3 SV=1	1	13	3	3	35	7	6	10	12	2	2	3	3	2	2	3	3	22.1	6	6	91266	810	810	1	21	0	49672	11.7	9.9	11.7	10.2	17.5	21.1	388510000	78432000	44606000	54820000	160120000	7194600	1452400	826040	0.00121201	0.000527211
Exponential	tr|Q4CQW5|Q4CQW5_TRYCC	tr|Q4CQW5|Q4CQW5_TRYCC	12	1	1	>tr|Q4CQW5|Q4CQW5_TRYCC Fumarate hydratase, putative OS=Trypanosoma cruzi (strain CL Brener) GN=Tc00.1047053509879.40 PE=4 SV=1	1	12	1	1	42	10	10	11	11	1	0	1	1	1	0	1	1	30.8	2.9	2.9	60.85	555	555	1	13	0.0011095	22469	25.4	25	25.4	27.9	27.7	27.7	329580000	32711000	0	33174000	70276000	8450800	838740	0	0.000699918
Exponential	tr|Q4DTV5|Q4DTV5_TRYCC	tr|Q4DTV5|Q4DTV5_TRYCC	12	1	1	>tr|Q4DTV5|Q4DTV5_TRYCC RuvB-like helicase OS=Trypanosoma cruzi (strain CL Brener) GN=Tc00.1047053508693.80 PE=3 SV=1	1	12	1	1	36	8	8	11	9	0	0	1	1	0	0	1	1	39.9	4.8	4.8	50.08	459	459	1	7	0.0034341	1799	25.5	25.9	18.7	22.4	39.4	33.8	273680000	0	0	84027000	189650000	10526000	0	0
Exponential	tr|Q4D1U0|Q4D1U0_TRYCC	tr|Q4D1U0|Q4D1U0_TRYCC	12	3	3	>tr|Q4D1U0|Q4D1U0_TRYCC Uncharacterized protein OS=Trypanosoma cruzi (strain CL Brener) GN=Tc00.1047053509589.40 PE=4 SV=1	1	12	3	3	33	7	6	11	9	1	0	3	2	1	0	3	2	12.3	3.1	3.1	152.29	1384	1384	1	14	0	39566	7	5.9	5.2	7.9	11.6	9.5	156480000	7137600	0	27715000	65179000	1738700	79307	0	6.61807e-05
Exponential	tr|Q4E5E4|Q4E5E4_TRYCC	tr|Q4E5E4|Q4E5E4_TRYCC	10	3	3	>tr|Q4E5E4|Q4E5E4_TRYCC Uncharacterized protein OS=Trypanosoma cruzi (strain CL Brener) GN=Tc00.1047053511277.490 PE=4 SV=1	1	10	3	3	33	7	7	9	10	0	1	2	3	0	1	2	3	23.7	8.9	8.9	50084	460	460	1	15	0	20824	14.8	14.8	14.8	14.8	21.5	23.7	403470000	0	0	153400000	250070000	13449000	0	0
Exponential	tr|Q4DK33|Q4DK33_TRYCC;tr|Q4DTP4|Q4DTP4_TRYCC	tr|Q4DK33|Q4DK33_TRYCC;tr|Q4DTP4|Q4DTP4_TRYCC	9;7	9;7	9;7	>tr|Q4DK33|Q4DK33_TRYCC Coatomer gamma subunit, putative (Fragment) OS=Trypanosoma cruzi (strain CL Brener) GN=Tc00.1047053508827.139 PE=4 SV=1;>tr|Q4DTP4|Q4DTP4_TRYCC Coatomer subunit gamma OS=Trypanosoma cruzi (strain CL Brener) GN=Tc00.1047053511211.20	2	9	9	9	19	1	6	6	6	1	6	6	6	1	6	6	6	18.4	18.4	18.4	83687	745	745;865	1	37	0	62099	1.5	9.7	6.6	4.6	12.8	13.3	830450000	48731000	91498000	228580000	409210000	17669000	1036800	1946800	0.000865197	0.00124252
Exponential	tr|Q4DV37|Q4DV37_TRYCC	tr|Q4DV37|Q4DV37_TRYCC	9	1	1	>tr|Q4DV37|Q4DV37_TRYCC Malic enzyme OS=Trypanosoma cruzi (strain CL Brener) GN=Tc00.1047053508647.270 PE=3 SV=1	1	9	1	1	32	8	8	8	8	1	1	1	1	1	1	1	1	22.2	3.8	3.8	63626	573	573	1	18	0	26612	19.7	19.7	19.7	20.1	19.7	19.7	441440000	64993000	37424000	52814000	166990000	15766000	2321200	1336600	0.00193701	0.00085307
Exponential	tr|Q4CR94|Q4CR94_TRYCC	tr|Q4CR94|Q4CR94_TRYCC	9	5	5	>tr|Q4CR94|Q4CR94_TRYCC Uncharacterized protein (Fragment) OS=Trypanosoma cruzi (strain CL Brener) GN=Tc00.1047053503681.9 PE=4 SV=1	1	9	5	5	24	4	5	7	8	1	2	3	4	1	2	3	4	9.9	5.6	5.6	152.03	1370	1370	1	18	0	13622	4	5.5	3.6	2.1	7.6	9	177770000	0	0	43594000	126170000	2279100	0	0
Exponential	tr|Q4E0N9|Q4E0N9_TRYCC	tr|Q4E0N9|Q4E0N9_TRYCC	8	2	2	>tr|Q4E0N9|Q4E0N9_TRYCC Eukaryotic release factor 3, putative OS=Trypanosoma cruzi (strain CL Brener) GN=Tc00.1047053506297.300 PE=4 SV=1	1	8	2	2	23	5	5	6	7	1	1	2	2	1	1	2	2	14	5.7	5.7	74958	680	680	1	10	0	21271	8.2	8.2	2.8	9.1	12.9	12.9	152550000	6830800	9325700	31402000	96461000	3720700	166600	227460	0.000139026	0.000145174
Exponential	tr|Q4CVP6|Q4CVP6_TRYCC	tr|Q4CVP6|Q4CVP6_TRYCC	8	1	1	>tr|Q4CVP6|Q4CVP6_TRYCC Uncharacterized protein OS=Trypanosoma cruzi (strain CL Brener) GN=Tc00.1047053511863.20 PE=4 SV=1	1	8	1	1	22	3	5	6	8	1	1	1	1	1	1	1	1	32.1	4.9	4.9	40.61	371	371	1	11	0	17898	14.3	21.3	9.4	14.3	26.7	32.1	524570000	17696000	9107900	143190000	332200000	20176000	680610	350300	0.000567961	0.000223575
Exponential	tr|Q4DEP5|Q4DEP5_TRYCC;tr|Q4DRS1|Q4DRS1_TRYCC	tr|Q4DEP5|Q4DEP5_TRYCC;tr|Q4DRS1|Q4DRS1_TRYCC	7;6	7;6	7;6	>tr|Q4DEP5|Q4DEP5_TRYCC Uncharacterized protein OS=Trypanosoma cruzi (strain CL Brener) GN=Tc00.1047053510819.10 PE=4 SV=1;>tr|Q4DRS1|Q4DRS1_TRYCC Uncharacterized protein OS=Trypanosoma cruzi (strain CL Brener) GN=Tc00.1047053506739.10 PE=4 SV=1	2	7	7	7	14	1	1	7	5	1	1	7	5	1	1	7	5	8.7	8.7	8.7	120.34	1086	1086;1086	1	28	0	21022	1.3	1.3	1.3	3.5	8.7	6.5	1215000000	133890000	195450000	254120000	481630000	19918000	2194900	3204000	0.00183162	0.00204492
Exponential	tr|Q4DYJ8|Q4DYJ8_TRYCC	tr|Q4DYJ8|Q4DYJ8_TRYCC	7	2	2	>tr|Q4DYJ8|Q4DYJ8_TRYCC Aminopeptidase, putative OS=Trypanosoma cruzi (strain CL Brener) GN=Tc00.1047053506211.200 PE=4 SV=1	1	7	2	2	22	5	3	7	7	1	1	2	2	1	1	2	2	28.3	7.9	7.9	42558	382	382	1	13	0	10483	23.3	13.6	9.9	11.3	28.3	28.3	1209400000	29741000	42454000	468170000	669070000	71143000	1749400	2497300	0.00145985	0.00159387
Exponential	tr|Q4E2W0|Q4E2W0_TRYCC	tr|Q4E2W0|Q4E2W0_TRYCC	7	1	1	>tr|Q4E2W0|Q4E2W0_TRYCC Glutamine synthetase, putative OS=Trypanosoma cruzi (strain CL Brener) GN=Tc00.1047053508175.370 PE=3 SV=1	1	7	1	1	22	4	5	7	6	0	1	1	1	0	1	1	1	23.7	3.7	3.7	49508	435	435	1	7	0	51409	13.3	17	13.3	11.3	23.7	19.5	113660000	0	8686200	62024000	42946000	4941600	0	377660		0.000241037
Exponential	tr|Q4CQP8|Q4CQP8_TRYCC	tr|Q4CQP8|Q4CQP8_TRYCC	7	3	3	>tr|Q4CQP8|Q4CQP8_TRYCC Retrotransposon hot spot (RHS) protein, putative (Fragment) OS=Trypanosoma cruzi (strain CL Brener) GN=Tc00.1047053503445.9 PE=4 SV=1	1	7	3	3	21	4	4	7	6	1	1	3	3	1	1	3	3	25.1	14.5	14.5	39771	351	351	1	18	0	16091	13.7	12	10.5	15.7	25.1	23.4	621670000	8304500	114150000	115070000	369700000	27029000	361060	4963200	0.0003013	0.00316771
Exponential	tr|Q4DIK0|Q4DIK0_TRYCC;tr|Q4DHL5|Q4DHL5_TRYCC	tr|Q4DIK0|Q4DIK0_TRYCC;tr|Q4DHL5|Q4DHL5_TRYCC	6;6	6;6	6;6	>tr|Q4DIK0|Q4DIK0_TRYCC AP complex subunit beta OS=Trypanosoma cruzi (strain CL Brener) GN=Tc00.1047053509799.10 PE=3 SV=1;>tr|Q4DHL5|Q4DHL5_TRYCC AP complex subunit beta OS=Trypanosoma cruzi (strain CL Brener) GN=Tc00.1047053504137.60 PE=3 SV=1	2	6	6	6	11	3	2	3	3	3	2	3	3	3	2	3	3	10.6	10.6	10.6	88.31	774	774;774	1	20	0	75448	4.7	3.1	0	1.4	5.6	5.7	153870000	17073000	9844200	48273000	78677000	3344900	371150	214000	0.00030972	0.000136583
Exponential	tr|Q4DUJ9|Q4DUJ9_TRYCC;tr|Q4D5J2|Q4D5J2_TRYCC	tr|Q4DUJ9|Q4DUJ9_TRYCC;tr|Q4D5J2|Q4D5J2_TRYCC	6;4	6;4	6;4	>tr|Q4DUJ9|Q4DUJ9_TRYCC Uncharacterized protein OS=Trypanosoma cruzi (strain CL Brener) GN=Tc00.1047053511245.210 PE=4 SV=1;>tr|Q4D5J2|Q4D5J2_TRYCC Uncharacterized protein OS=Trypanosoma cruzi (strain CL Brener) GN=Tc00.1047053510989.60 PE=4 SV=1	2	6	6	6	10	0	0	5	5	0	0	5	5	0	0	5	5	17.5	17.5	17.5	52664	513	513;620	1	25	0	22.13	0	0	0	0	17.5	13.1	1064200000	0	0	351600000	712640000	33257000	0	0
Exponential	tr|Q4DFY2|Q4DFY2_TRYCC;tr|Q4CSP3|Q4CSP3_TRYCC;tr|Q4CW07|Q4CW07_TRYCC	tr|Q4DFY2|Q4DFY2_TRYCC;tr|Q4CSP3|Q4CSP3_TRYCC	6;3;2	6;3;2	6;3;2	>tr|Q4DFY2|Q4DFY2_TRYCC Uncharacterized protein OS=Trypanosoma cruzi (strain CL Brener) GN=Tc00.1047053510655.90 PE=4 SV=1;>tr|Q4CSP3|Q4CSP3_TRYCC Uncharacterized protein (Fragment) OS=Trypanosoma cruzi (strain CL Brener) GN=Tc00.1047053510751.40 PE=4 SV=1	3	6	6	6	10	0	1	4	5	0	1	4	5	0	1	4	5	11	11	11	100.12	907	907;562;253	1	18	0	38712	0	1.8	0	1.8	7.2	8.9	403420000	0	36080000	112700000	250180000	8770000	0	784350		0.000500603
Exponential	tr|Q4DDP3|Q4DDP3_TRYCC;tr|Q4CLN6|Q4CLN6_TRYCC	tr|Q4DDP3|Q4DDP3_TRYCC;tr|Q4CLN6|Q4CLN6_TRYCC	6;3	6;3	6;3	>tr|Q4DDP3|Q4DDP3_TRYCC AP-3 complex subunit delta OS=Trypanosoma cruzi (strain CL Brener) GN=Tc00.1047053507811.20 PE=3 SV=1;>tr|Q4CLN6|Q4CLN6_TRYCC Delta-adaptin, putative (Fragment) OS=Trypanosoma cruzi (strain CL Brener) GN=Tc00.1047053511651.19 PE=4 S	2	6	6	6	11	2	2	4	3	2	2	4	3	2	2	4	3	5.7	5.7	5.7	126.98	1136	1136;220	1	25	0	13238	2.3	2.3	2.1	3.5	4.6	3.3	455100000	66032000	94080000	78462000	135970000	7001600	1015900	1447400	0.000847756	0.000923787
Exponential	tr|Q4CWB3|Q4CWB3_TRYCC;tr|Q4CL50|Q4CL50_TRYCC;tr|Q4CXF5|Q4CXF5_TRYCC	tr|Q4CWB3|Q4CWB3_TRYCC	6;2;1	6;2;1	6;2;1	>tr|Q4CWB3|Q4CWB3_TRYCC Acetyl-CoA carboxylase, putative (Fragment) OS=Trypanosoma cruzi (strain CL Brener) GN=Tc00.1047053508369.50 PE=4 SV=1	3	6	6	6	11	1	1	5	4	1	1	5	4	1	1	5	4	11.9	11.9	11.9	96538	871	871;563;320	1	22	0	10.24	1.8	1.8	5.2	1.8	11.9	10.1	641810000	94047000	108230000	136010000	198200000	13371000	1959300	2254800	0.00163501	0.0014391
Exponential	tr|Q4DSA8|Q4DSA8_TRYCC;tr|Q4D5X7|Q4D5X7_TRYCC	tr|Q4DSA8|Q4DSA8_TRYCC	6;2	6;2	6;2	>tr|Q4DSA8|Q4DSA8_TRYCC Uncharacterized protein OS=Trypanosoma cruzi (strain CL Brener) GN=Tc00.1047053507031.20 PE=4 SV=1	2	6	6	6	11	2	1	3	5	2	1	3	5	2	1	3	5	12.3	12.3	12.3	83676	746	746;393	1	21	0	11496	3.5	2.1	2.1	3.8	6.6	11	424840000	39364000	52283000	96506000	208220000	10621000	984100	1307100	0.000821219	0.000834242
Exponential	tr|Q4DD39|Q4DD39_TRYCC	tr|Q4DD39|Q4DD39_TRYCC	6	2	2	>tr|Q4DD39|Q4DD39_TRYCC Glucosamine-6-phosphate isomerase OS=Trypanosoma cruzi (strain CL Brener) GN=Tc00.1047053511025.50 PE=3 SV=1	1	6	2	2	22	5	5	6	6	1	1	2	2	1	1	2	2	30.5	11.8	11.8	31442	279	279	1	20	0	50819	22.9	22.9	22.9	20.1	30.5	30.5	886000000	106010000	137160000	207250000	261930000	59067000	7067400	9144200	0.00589766	0.00583618
Exponential	tr|Q4E1W3|Q4E1W3_TRYCC	tr|Q4E1W3|Q4E1W3_TRYCC	6	1	1	>tr|Q4E1W3|Q4E1W3_TRYCC Uncharacterized protein OS=Trypanosoma cruzi (strain CL Brener) GN=Tc00.1047053507993.150 PE=4 SV=1	1	6	1	1	18	3	5	6	4	1	1	1	1	1	1	1	1	23.2	4.5	4.5	37401	332	332	1	10	0	67611	8.1	14.8	6.6	7.2	23.2	11.1	171920000	8985900	11435000	60567000	90934000	7163400	374410	476480	0.000312441	0.000304108
Exponential	tr|Q4CVP1|Q4CVP1_TRYCC	tr|Q4CVP1|Q4CVP1_TRYCC	6	3	3	>tr|Q4CVP1|Q4CVP1_TRYCC Uncharacterized protein OS=Trypanosoma cruzi (strain CL Brener) GN=Tc00.1047053509289.30 PE=4 SV=1	1	6	3	3	16	2	3	5	6	1	1	2	3	1	1	2	3	15.2	9	9	60795	553	553	1	11	0	30899	5.1	7.6	5.4	2.2	13.4	15.2	223070000	0	33479000	52787000	115810000	6759600	0	1014500		0.000647493
Exponential	tr|Q4CNK1|Q4CNK1_TRYCC	tr|Q4CNK1|Q4CNK1_TRYCC	6	2	1	>tr|Q4CNK1|Q4CNK1_TRYCC Nucleolar protein, putative (Fragment) OS=Trypanosoma cruzi (strain CL Brener) GN=Tc00.1047053506189.10 PE=4 SV=1	1	6	2	1	15	1	3	5	6	0	1	2	2	0	1	1	1	33.2	12.4	7.1	31771	283	283	1	12	0	56645	7.8	18	18	18	26.9	33.2	290530000	0	0	117280000	155010000	16141000	0	0
Exponential	tr|Q4CY83|Q4CY83_TRYCC	tr|Q4CY83|Q4CY83_TRYCC	6	1	1	>tr|Q4CY83|Q4CY83_TRYCC Uncharacterized protein (Fragment) OS=Trypanosoma cruzi (strain CL Brener) GN=Tc00.1047053510001.59 PE=4 SV=1	1	6	1	1	13	2	1	6	4	0	0	1	1	0	0	1	1	20.3	3.8	3.8	37811	344	344	1	8	0.0046007	15269	7	2.9	2.9	2.9	20.3	17.2	156860000	0	0	59207000	97655000	12066000	0	0
Exponential	tr|Q4DSX1|Q4DSX1_TRYCC;tr|Q4DN31|Q4DN31_TRYCC	tr|Q4DSX1|Q4DSX1_TRYCC;tr|Q4DN31|Q4DN31_TRYCC	5;5	5;5	5;5	>tr|Q4DSX1|Q4DSX1_TRYCC Deoxyhypusine hydroxylase OS=Trypanosoma cruzi (strain CL Brener) GN=Tc00.1047053508347.130 PE=3 SV=1;>tr|Q4DN31|Q4DN31_TRYCC Deoxyhypusine hydroxylase OS=Trypanosoma cruzi (strain CL Brener) GN=Tc00.1047053507615.70 PE=3 SV=1	2	5	5	5	11	2	1	3	5	2	1	3	5	2	1	3	5	19.8	19.8	19.8	35442	318	318;318	1	24	0	72587	7.5	4.1	3.5	8.2	11.9	19.8	526700000	51659000	0	140560000	296270000	29261000	2869900	0	0.0023949
Exponential	tr|Q4DGZ6|Q4DGZ6_TRYCC;tr|Q4CRN8|Q4CRN8_TRYCC	tr|Q4DGZ6|Q4DGZ6_TRYCC;tr|Q4CRN8|Q4CRN8_TRYCC	5;4	5;4	5;4	>tr|Q4DGZ6|Q4DGZ6_TRYCC Uncharacterized protein OS=Trypanosoma cruzi (strain CL Brener) GN=Tc00.1047053511809.120 PE=4 SV=1;>tr|Q4CRN8|Q4CRN8_TRYCC Uncharacterized protein (Fragment) OS=Trypanosoma cruzi (strain CL Brener) GN=Tc00.1047053511811.30 PE=4 SV=	2	5	5	5	10	0	1	4	5	0	1	4	5	0	1	4	5	30.3	30.3	30.3	33852	300	300;254	1	22	0	14526	0	6.7	0	0	26.7	30.3	785690000	0	32826000	200590000	552270000	52379000	0	2188400		0.00139672
Exponential	tr|Q4DD92|Q4DD92_TRYCC;tr|Q4CMH9|Q4CMH9_TRYCC	tr|Q4DD92|Q4DD92_TRYCC;tr|Q4CMH9|Q4CMH9_TRYCC	5;3	5;3	5;3	>tr|Q4DD92|Q4DD92_TRYCC Fatty acyl CoA syntetase 1, putative OS=Trypanosoma cruzi (strain CL Brener) GN=Tc00.1047053506829.100 PE=4 SV=1;>tr|Q4CMH9|Q4CMH9_TRYCC Fatty acyl CoA syntetase 1, putative (Fragment) OS=Trypanosoma cruzi (strain CL Brener) GN=Tc00	2	5	5	5	11	2	2	3	4	2	2	3	4	2	2	3	4	9	9	9	77545	699	699;267	1	20	0	24134	4	3.3	2.4	4.7	5.2	7.4	236130000	23951000	23980000	49442000	128270000	5366700	544350	545000	0.000454253	0.00034784
Exponential	tr|Q4E1W2|Q4E1W2_TRYCC;tr|Q4E5D4|Q4E5D4_TRYCC	tr|Q4E1W2|Q4E1W2_TRYCC;tr|Q4E5D4|Q4E5D4_TRYCC	5;3	5;3	5;3	>tr|Q4E1W2|Q4E1W2_TRYCC Uncharacterized protein OS=Trypanosoma cruzi (strain CL Brener) GN=Tc00.1047053507993.160 PE=1 SV=1;>tr|Q4E5D4|Q4E5D4_TRYCC Uncharacterized protein OS=Trypanosoma cruzi (strain CL Brener) GN=Tc00.1047053511277.600 PE=4 SV=1	2	5	5	5	8	0	0	3	5	0	0	3	5	0	0	3	5	13.5	13.5	13.5	54812	480	480;480	1	16	0	9435	0	0	0	1.5	8.1	13.5	192820000	0	0	67257000	107350000	6886300	0	0
Exponential	tr|Q4DER7|Q4DER7_TRYCC;tr|Q4D3B6|Q4D3B6_TRYCC;tr|Q4D9Q7|Q4D9Q7_TRYCC	tr|Q4DER7|Q4DER7_TRYCC	5;2;1	5;2;1	5;2;1	>tr|Q4DER7|Q4DER7_TRYCC Uncharacterized protein OS=Trypanosoma cruzi (strain CL Brener) GN=Tc00.1047053505071.110 PE=4 SV=1	3	5	5	5	13	2	1	5	5	2	1	5	5	2	1	5	5	13.1	13.1	13.1	55388	519	519;280;217	1	25	0	81228	5.8	3.3	5.2	5.2	13.1	13.1	547460000	22290000	0	136520000	336880000	18878000	768610	0	0.000641396
Exponential	tr|Q4CNT1|Q4CNT1_TRYCC;tr|Q4D5M6|Q4D5M6_TRYCC	tr|Q4CNT1|Q4CNT1_TRYCC	5;2	5;2	5;2	>tr|Q4CNT1|Q4CNT1_TRYCC Uncharacterized protein (Fragment) OS=Trypanosoma cruzi (strain CL Brener) GN=Tc00.1047053510969.40 PE=4 SV=1	2	5	5	5	10	1	1	5	3	1	1	5	3	1	1	5	3	30.7	30.7	30.7	24299	228	228;118	1	18	0	22124	3.9	6.6	0	3.9	30.7	21.5	432240000	30552000	67160000	117300000	179470000	36020000	2546000	5596700	0.00212461	0.00357203
Exponential	tr|Q4DSI4|Q4DSI4_TRYCC;tr|Q4E3R8|Q4E3R8_TRYCC	tr|Q4DSI4|Q4DSI4_TRYCC	5;2	5;2	5;2	>tr|Q4DSI4|Q4DSI4_TRYCC Uncharacterized protein OS=Trypanosoma cruzi (strain CL Brener) GN=Tc00.1047053508543.170 PE=4 SV=1	2	5	5	5	10	0	1	5	4	0	1	5	4	0	1	5	4	16.9	16.9	16.9	54004	480	480;480	1	19	0	87226	0	2.7	0	0	16.9	14.2	420470000	0	9121200	140120000	271220000	13564000	0	294230		0.000187789
Exponential	tr|Q4D3C2|Q4D3C2_TRYCC;tr|Q4CN11|Q4CN11_TRYCC	tr|Q4D3C2|Q4D3C2_TRYCC	5;1	5;1	5;1	>tr|Q4D3C2|Q4D3C2_TRYCC Formin C OS=Trypanosoma cruzi (strain CL Brener) GN=Tc00.1047053511393.30 PE=4 SV=1	2	5	5	5	11	1	2	3	5	1	2	3	5	1	2	3	5	7.6	7.6	7.6	104.61	937	937;228	1	24	0	80937	1.3	2.9	1.3	1.8	4.7	7.6	390590000	23621000	36731000	94873000	218220000	7101600	429470	667830	0.000358387	0.000426235
Exponential	tr|Q4DP83|Q4DP83_TRYCC	tr|Q4DP83|Q4DP83_TRYCC	5	2	2	>tr|Q4DP83|Q4DP83_TRYCC Eukaryotic translation initiation factor eIF-4E, putative OS=Trypanosoma cruzi (strain CL Brener) GN=Tc00.1047053506127.170 PE=3 SV=1	1	5	2	2	16	3	3	5	5	1	1	2	2	1	1	2	2	23.8	10	10	28962	261	261	1	15	0	42841	11.9	11.9	11.9	11.9	23.8	23.8	263630000	39826000	61301000	36500000	72225000	14646000	2212600	3405600	0.00184639	0.00217359
Exponential	tr|Q4CTR7|Q4CTR7_TRYCC	tr|Q4CTR7|Q4CTR7_TRYCC	5	2	2	>tr|Q4CTR7|Q4CTR7_TRYCC Malate dehydrogenase OS=Trypanosoma cruzi (strain CL Brener) GN=Tc00.1047053506937.10 PE=3 SV=1	1	5	2	2	15	2	3	5	5	0	1	2	2	0	1	2	2	22.3	12.7	12.7	35589	332	332	1	15	0	30081	6.9	13.6	6.9	3.9	22.3	22.3	522280000	0	31340000	154660000	336280000	27488000	0	1649500		0.00105278
Exponential	tr|Q4D991|Q4D991_TRYCC	tr|Q4D991|Q4D991_TRYCC	5	3	3	>tr|Q4D991|Q4D991_TRYCC 60S acidic ribosomal protein, putative OS=Trypanosoma cruzi (strain CL Brener) GN=Tc00.1047053510823.70 PE=3 SV=1	1	5	3	3	14	3	2	4	5	1	1	3	3	1	1	3	3	63.3	48.6	48.6	10754	109	109	1	20	0	38258	23.9	23.9	23.9	23.9	63.3	63.3	4397400000	314780000	777280000	1194000000	1679000000	732900000	52463000	129550000	0.0437797	0.0826838
Exponential	tr|Q4DMJ7|Q4DMJ7_TRYCC	tr|Q4DMJ7|Q4DMJ7_TRYCC	5	5	5	>tr|Q4DMJ7|Q4DMJ7_TRYCC Uncharacterized protein OS=Trypanosoma cruzi (strain CL Brener) GN=Tc00.1047053508815.70 PE=4 SV=1	1	5	5	5	11	0	1	5	5	0	1	5	5	0	1	5	5	16.4	16.4	16.4	59946	524	524	1	27	0	44597	0	2.7	0	2.9	16.4	16.4	657730000	0	51324000	280960000	319640000	21924000	0	1710800		0.0010919
Exponential	tr|Q4DTK4|Q4DTK4_TRYCC	tr|Q4DTK4|Q4DTK4_TRYCC	5	5	5	>tr|Q4DTK4|Q4DTK4_TRYCC 50S ribosomal protein L7Ae, putative OS=Trypanosoma cruzi (strain CL Brener) GN=Tc00.1047053507053.10 PE=4 SV=1	1	5	5	5	10	3	1	3	3	3	1	3	3	3	1	3	3	34.5	34.5	34.5	16852	148	148	1	22	0	17593	23	6.1	14.9	25.7	17.6	20.3	464770000	102640000	70880000	89901000	104110000	51642000	11404000	7875500	0.0095165	0.00502645
Exponential	tr|Q4DPM2|Q4DPM2_TRYCC	tr|Q4DPM2|Q4DPM2_TRYCC	5	5	5	>tr|Q4DPM2|Q4DPM2_TRYCC Uncharacterized protein (Fragment) OS=Trypanosoma cruzi (strain CL Brener) GN=Tc00.1047053507083.109 PE=4 SV=1	1	5	5	5	9	1	1	3	4	1	1	3	4	1	1	3	4	2	2	2	530	4848	4848	1	22	0	23781	0.3	0.3	0.8	0.3	1.3	1.2	610680000	74414000	135600000	99786000	157710000	2385500	290680	529670	0.000242569	0.000338056
Exponential	tr|Q4CY39|Q4CY39_TRYCC	tr|Q4CY39|Q4CY39_TRYCC	5	5	5	>tr|Q4CY39|Q4CY39_TRYCC Uncharacterized protein OS=Trypanosoma cruzi (strain CL Brener) GN=Tc00.1047053503971.10 PE=4 SV=1	1	5	5	5	9	0	0	4	5	0	0	4	5	0	0	4	5	14.1	14.1	14.1	71717	638	638	1	22	0	10913	0	0	3.1	0	11.8	14.1	500540000	0	0	176600000	318520000	14722000	0	0
Exponential	tr|Q4DIG9|Q4DIG9_TRYCC;tr|Q4DI16|Q4DI16_TRYCC;REV__tr|Q4DIG9|Q4DIG9_TRYCC;REV__tr|Q4DI16|Q4DI16_TRYCC	tr|Q4DIG9|Q4DIG9_TRYCC;tr|Q4DI16|Q4DI16_TRYCC	4;4;1;1	4;4;1;1	4;4;1;1	>tr|Q4DIG9|Q4DIG9_TRYCC Uncharacterized protein OS=Trypanosoma cruzi (strain CL Brener) GN=Tc00.1047053506733.130 PE=4 SV=1;>tr|Q4DI16|Q4DI16_TRYCC Uncharacterized protein OS=Trypanosoma cruzi (strain CL Brener) GN=Tc00.1047053509229.110 PE=4 SV=1	4	4	4	4	7	1	1	2	3	1	1	2	3	1	1	2	3	9.5	9.5	9.5	77416	682	682;683;682;683	1	12	0	10539	2.3	2.2	2.2	0	6.2	7.2	144180000	0	0	57300000	82858000	3696800	0	0
Exponential	tr|Q4CWR2|Q4CWR2_TRYCC;tr|Q4CPK1|Q4CPK1_TRYCC	tr|Q4CWR2|Q4CWR2_TRYCC;tr|Q4CPK1|Q4CPK1_TRYCC	4;4	4;4	4;4	>tr|Q4CWR2|Q4CWR2_TRYCC Uncharacterized protein OS=Trypanosoma cruzi (strain CL Brener) GN=Tc00.1047053506583.50 PE=4 SV=1;>tr|Q4CPK1|Q4CPK1_TRYCC Uncharacterized protein OS=Trypanosoma cruzi (strain CL Brener) GN=Tc00.1047053506677.30 PE=4 SV=1	2	4	4	4	10	2	3	3	2	2	3	3	2	2	3	3	2	25.5	25.5	25.5	28674	251	251;251	1	25	0	70651	11.6	17.9	20.7	20.7	21.5	12.4	441920000	24948000	93370000	100840000	150790000	27620000	1559200	5835700	0.00130113	0.00372457
Exponential	tr|Q4E3S5|Q4E3S5_TRYCC;tr|Q4DSJ1|Q4DSJ1_TRYCC	tr|Q4E3S5|Q4E3S5_TRYCC;tr|Q4DSJ1|Q4DSJ1_TRYCC	4;4	4;4	4;4	>tr|Q4E3S5|Q4E3S5_TRYCC Uncharacterized protein OS=Trypanosoma cruzi (strain CL Brener) GN=Tc00.1047053506401.180 PE=4 SV=1;>tr|Q4DSJ1|Q4DSJ1_TRYCC Uncharacterized protein OS=Trypanosoma cruzi (strain CL Brener) GN=Tc00.1047053508543.100 PE=4 SV=1	2	4	4	4	10	1	1	4	4	1	1	4	4	1	1	4	4	16.8	16.8	16.8	38441	334	334;334	1	31	0	14743	3.9	3.9	3.9	3.9	16.8	16.8	523660000	92497000	34593000	115750000	202080000	26183000	4624800	1729600	0.00385934	0.0011039
Exponential	tr|Q4CVB9|Q4CVB9_TRYCC;tr|Q4DBM0|Q4DBM0_TRYCC	tr|Q4CVB9|Q4CVB9_TRYCC;tr|Q4DBM0|Q4DBM0_TRYCC	4;4	4;4	4;4	>tr|Q4CVB9|Q4CVB9_TRYCC Mitochondrial RNA binding protein, putative (Fragment) OS=Trypanosoma cruzi (strain CL Brener) GN=Tc00.1047053510509.50 PE=4 SV=1;>tr|Q4DBM0|Q4DBM0_TRYCC Mitochondrial RNA binding protein, putative OS=Trypanosoma cruzi (strain CL Br	2	4	4	4	9	2	1	3	3	2	1	3	3	2	1	3	3	22	22	22	28021	246	246;338	1	22	0	19358	11	3.3	11	11	18.7	18.7	1101500000	81603000	99573000	282880000	486300000	73437000	5440200	6638200	0.00453978	0.00423676
Exponential	tr|Q4DVG8|Q4DVG8_TRYCC;tr|Q4DJA1|Q4DJA1_TRYCC	tr|Q4DVG8|Q4DVG8_TRYCC;tr|Q4DJA1|Q4DJA1_TRYCC	4;4	4;4	4;4	>tr|Q4DVG8|Q4DVG8_TRYCC Uncharacterized protein OS=Trypanosoma cruzi (strain CL Brener) GN=Tc00.1047053506859.70 PE=4 SV=1;>tr|Q4DJA1|Q4DJA1_TRYCC Uncharacterized protein OS=Trypanosoma cruzi (strain CL Brener) GN=Tc00.1047053511815.40 PE=4 SV=1	2	4	4	4	9	1	1	4	3	1	1	4	3	1	1	4	3	12.3	12.3	12.3	52575	471	471;471	1	27	0	70765	1.9	1.9	1.9	4	12.3	10.4	1028800000	56601000	37037000	392560000	464850000	42866000	2358400	1543200	0.00196806	0.00098493
Exponential	tr|Q4DPD9|Q4DPD9_TRYCC;tr|Q4DHS7|Q4DHS7_TRYCC	tr|Q4DPD9|Q4DPD9_TRYCC;tr|Q4DHS7|Q4DHS7_TRYCC	4;4	4;4	4;4	>tr|Q4DPD9|Q4DPD9_TRYCC Uncharacterized protein OS=Trypanosoma cruzi (strain CL Brener) GN=Tc00.1047053507625.170 PE=4 SV=1;>tr|Q4DHS7|Q4DHS7_TRYCC Uncharacterized protein OS=Trypanosoma cruzi (strain CL Brener) GN=Tc00.1047053507787.20 PE=4 SV=1	2	4	4	4	9	1	1	3	4	1	1	3	4	1	1	3	4	8.2	8.2	8.2	73576	647	647;647	1	17	0	45159	2.2	2.2	2.2	2.2	6.3	8.2	430530000	43253000	66590000	71356000	231900000	13888000	1395300	2148000	0.00116436	0.00137094
Exponential	tr|Q4DME2|Q4DME2_TRYCC;tr|Q4DHB2|Q4DHB2_TRYCC	tr|Q4DME2|Q4DME2_TRYCC;tr|Q4DHB2|Q4DHB2_TRYCC	4;4	4;4	4;4	>tr|Q4DME2|Q4DME2_TRYCC Pantothenate kinase subunit, putative OS=Trypanosoma cruzi (strain CL Brener) GN=Tc00.1047053506779.80 PE=4 SV=1;>tr|Q4DHB2|Q4DHB2_TRYCC Pantothenate kinase subunit, putative OS=Trypanosoma cruzi (strain CL Brener) GN=Tc00.104705351	2	4	4	4	9	1	1	4	3	1	1	4	3	1	1	4	3	4.9	4.9	4.9	164.2	1480	1480;1480	1	19	0	54729	1.5	1.5	1.5	1.5	4.9	3.9	454830000	21516000	65304000	120010000	175820000	5110400	241750	733750	0.000201737	0.000468308
Exponential	tr|Q4DDV3|Q4DDV3_TRYCC;tr|Q4DKN8|Q4DKN8_TRYCC	tr|Q4DDV3|Q4DDV3_TRYCC;tr|Q4DKN8|Q4DKN8_TRYCC	4;4	4;4	4;4	>tr|Q4DDV3|Q4DDV3_TRYCC Uncharacterized protein OS=Trypanosoma cruzi (strain CL Brener) GN=Tc00.1047053509561.130 PE=4 SV=1;>tr|Q4DKN8|Q4DKN8_TRYCC Uncharacterized protein OS=Trypanosoma cruzi (strain CL Brener) GN=Tc00.1047053503897.70 PE=4 SV=1	2	4	4	4	8	1	1	3	3	1	1	3	3	1	1	3	3	22.7	22.7	22.7	18973	172	172;173	1	18	0	25065	8.7	8.7	8.7	8.7	17.4	14.5	558110000	36320000	69705000	98025000	213640000	46509000	3026600	5808700	0.00252566	0.00370734
Exponential	tr|Q4DZP7|Q4DZP7_TRYCC;tr|Q4DBN2|Q4DBN2_TRYCC	tr|Q4DZP7|Q4DZP7_TRYCC;tr|Q4DBN2|Q4DBN2_TRYCC	4;4	4;4	4;4	>tr|Q4DZP7|Q4DZP7_TRYCC DNA mismatch repair protein MSH2, putative OS=Trypanosoma cruzi (strain CL Brener) GN=Tc00.1047053507711.320 PE=4 SV=1;>tr|Q4DBN2|Q4DBN2_TRYCC DNA mismatch repair protein MSH2, putative OS=Trypanosoma cruzi (strain CL Brener) GN=Tc0	2	4	4	4	8	2	0	3	3	2	0	3	3	2	0	3	3	4.6	4.6	4.6	106.48	960	960;989	1	11	0	87329	2.4	0	0	1.1	3.3	3.4	89385000	4585300	0	40133000	44667000	1396600	71645	0	5.97869e-05
Exponential	tr|Q4DI02|Q4DI02_TRYCC;tr|Q4CT37|Q4CT37_TRYCC	tr|Q4DI02|Q4DI02_TRYCC;tr|Q4CT37|Q4CT37_TRYCC	4;4	4;4	4;4	>tr|Q4DI02|Q4DI02_TRYCC 2-amino-3-ketobutyrate coenzyme A ligase, putative OS=Trypanosoma cruzi (strain CL Brener) GN=Tc00.1047053511071.140 PE=3 SV=1;>tr|Q4CT37|Q4CT37_TRYCC 2-amino-3-ketobutyrate coenzyme A ligase, putative OS=Trypanosoma cruzi (strain C	2	4	4	4	8	1	0	3	4	1	0	3	4	1	0	3	4	13.6	13.6	13.6	43672	404	404;404	1	15	0	19237	4.7	0	2.5	0	11.1	13.6	279180000	0	0	87206000	180260000	12138000	0	0
Exponential	tr|Q4DPJ1|Q4DPJ1_TRYCC;tr|Q4DL77|Q4DL77_TRYCC	tr|Q4DPJ1|Q4DPJ1_TRYCC;tr|Q4DL77|Q4DL77_TRYCC	4;4	4;4	4;4	>tr|Q4DPJ1|Q4DPJ1_TRYCC ADP-ribosylation factor, putative OS=Trypanosoma cruzi (strain CL Brener) GN=Tc00.1047053506513.60 PE=3 SV=1;>tr|Q4DL77|Q4DL77_TRYCC ADP-ribosylation factor, putative OS=Trypanosoma cruzi (strain CL Brener) GN=Tc00.1047053508919.60	2	4	4	4	7	1	1	2	3	1	1	2	3	1	1	2	3	32.1	32.1	32.1	21127	190	190;291	1	20	0	11623	7.9	7.9	7.9	14.7	13.2	25.3	400460000	59475000	74520000	74218000	116320000	30805000	4575000	5732300	0.00381778	0.00365858
Exponential	tr|Q4CSR6|Q4CSR6_TRYCC;tr|Q4D1K2|Q4D1K2_TRYCC	tr|Q4CSR6|Q4CSR6_TRYCC;tr|Q4D1K2|Q4D1K2_TRYCC	4;3	4;3	4;3	>tr|Q4CSR6|Q4CSR6_TRYCC Uncharacterized protein OS=Trypanosoma cruzi (strain CL Brener) GN=Tc00.1047053507665.10 PE=4 SV=1;>tr|Q4D1K2|Q4D1K2_TRYCC Uncharacterized protein OS=Trypanosoma cruzi (strain CL Brener) GN=Tc00.1047053506179.20 PE=4 SV=1	2	4	4	4	9	1	2	3	3	1	2	3	3	1	2	3	3	12.8	12.8	12.8	57581	515	515;515	1	21	0	57279	3.3	6	8.3	3.3	8.3	10.5	344400000	23495000	11072000	89799000	115050000	11480000	783180	369070	0.000653554	0.000235555
Exponential	tr|Q4DZX6|Q4DZX6_TRYCC;tr|Q4DQ82|Q4DQ82_TRYCC	tr|Q4DZX6|Q4DZX6_TRYCC;tr|Q4DQ82|Q4DQ82_TRYCC	4;3	4;3	4;3	>tr|Q4DZX6|Q4DZX6_TRYCC Double-strand-break repair protein rad21 homolog, putative OS=Trypanosoma cruzi (strain CL Brener) GN=Tc00.1047053506789.130 PE=4 SV=1;>tr|Q4DQ82|Q4DQ82_TRYCC Double-strand-break repair protein rad21 homolog, putative OS=Trypanosoma	2	4	4	4	9	1	1	4	3	1	1	4	3	1	1	4	3	9.8	9.8	9.8	64198	590	590;585	1	17	0	32.91	1.9	1.9	0	2	9.8	6.6	217850000	1684700	1305200	67870000	137350000	7780400	60167	46614	5.02086e-05	2.97509e-05
Exponential	tr|Q4D8Z3|Q4D8Z3_TRYCC;tr|Q4DDM1|Q4DDM1_TRYCC	tr|Q4D8Z3|Q4D8Z3_TRYCC;tr|Q4DDM1|Q4DDM1_TRYCC	4;3	4;3	4;3	>tr|Q4D8Z3|Q4D8Z3_TRYCC Uncharacterized protein OS=Trypanosoma cruzi (strain CL Brener) GN=Tc00.1047053510351.70 PE=4 SV=1;>tr|Q4DDM1|Q4DDM1_TRYCC Uncharacterized protein OS=Trypanosoma cruzi (strain CL Brener) GN=Tc00.1047053507601.90 PE=4 SV=1	2	4	4	4	7	0	0	4	3	0	0	4	3	0	0	4	3	7	7	7	87318	775	775;775	1	13	0	5.29	0	0	0	0	7	5.5	289910000	0	0	106620000	183300000	6168400	0	0
Exponential	tr|Q4E0P7|Q4E0P7_TRYCC	tr|Q4E0P7|Q4E0P7_TRYCC	4	4	2	>tr|Q4E0P7|Q4E0P7_TRYCC Uncharacterized protein OS=Trypanosoma cruzi (strain CL Brener) GN=Tc00.1047053506297.220 PE=4 SV=1	1	4	4	2	12	2	2	4	4	2	2	4	4	2	2	2	2	22.8	22.8	15.7	27654	268	268	1	24	0	67377	15.7	15.7	6.7	3.7	22.8	22.8	2333900000	306520000	382280000	369750000	534520000	155600000	20435000	25486000	0.0170528	0.0162662
Exponential	tr|Q4DP18|Q4DP18_TRYCC	tr|Q4DP18|Q4DP18_TRYCC	4	4	4	>tr|Q4DP18|Q4DP18_TRYCC Uncharacterized protein OS=Trypanosoma cruzi (strain CL Brener) GN=Tc00.1047053509669.50 PE=4 SV=1	1	4	4	4	11	2	2	4	3	2	2	4	3	2	2	4	3	3.6	3.6	3.6	189.97	1732	1732	1	21	0	52659	1.7	1.7	2.4	0	3.6	2.9	2540100000	400160000	248510000	753380000	782070000	25920000	4083300	2535800	0.00340746	0.00161845
Exponential	tr|Q4DAS0|Q4DAS0_TRYCC	tr|Q4DAS0|Q4DAS0_TRYCC	4	4	4	>tr|Q4DAS0|Q4DAS0_TRYCC Oxidoreductase, putative OS=Trypanosoma cruzi (strain CL Brener) GN=Tc00.1047053506485.80 PE=4 SV=1	1	4	4	4	11	2	2	4	3	2	2	4	3	2	2	4	3	12.5	12.5	12.5	36529	337	337	1	21	0	54861	4.2	4.2	4.2	4.2	12.5	7.7	450150000	43253000	112160000	49222000	131830000	20462000	1966100	5098300	0.00164069	0.00325393
Exponential	tr|Q4E679|Q4E679_TRYCC	tr|Q4E679|Q4E679_TRYCC	4	4	2	>tr|Q4E679|Q4E679_TRYCC Enoyl-CoA hydratase, mitochondrial, putative OS=Trypanosoma cruzi (strain CL Brener) GN=Tc00.1047053508153.130 PE=3 SV=1	1	4	4	2	9	1	2	2	4	1	2	2	4	1	1	1	2	18.7	18.7	8.6	28789	267	267	1	19	0	32621	3.4	7.9	3.4	7.9	7.9	18.7	786540000	116970000	184510000	99175000	199640000	46267000	6880500	10853000	0.00574169	0.00692681
Exponential	tr|Q4D0L5|Q4D0L5_TRYCC	tr|Q4D0L5|Q4D0L5_TRYCC	4	3	3	>tr|Q4D0L5|Q4D0L5_TRYCC Uncharacterized protein OS=Trypanosoma cruzi (strain CL Brener) GN=Tc00.1047053506301.30 PE=4 SV=1	1	4	3	3	9	1	1	3	4	1	1	3	3	1	1	3	3	13.5	10.3	10.3	56676	504	504	1	20	0	37652	2.6	2.6	2.6	2.6	10.3	13.5	689030000	180890000	76376000	110050000	169400000	29958000	7864900	3320700	0.00656316	0.0021194
Exponential	tr|Q4E0L9|Q4E0L9_TRYCC	tr|Q4E0L9|Q4E0L9_TRYCC	4	4	1	>tr|Q4E0L9|Q4E0L9_TRYCC Proteasome subunit beta type OS=Trypanosoma cruzi (strain CL Brener) GN=Tc00.1047053509429.110 PE=3 SV=1	1	4	4	1	9	1	1	3	4	1	1	3	4	0	0	1	1	28.2	28.2	13.7	30819	284	284	1	16	0	18167	6.3	3.2	0	0	25	28.2	593920000	21484000	66298000	136200000	369940000	37120000	1342700	4143600	0.00112047	0.00264461
Exponential	tr|Q4D622|Q4D622_TRYCC	tr|Q4D622|Q4D622_TRYCC	4	4	4	>tr|Q4D622|Q4D622_TRYCC Uncharacterized protein OS=Trypanosoma cruzi (strain CL Brener) GN=Tc00.1047053507907.50 PE=4 SV=1	1	4	4	4	9	2	1	3	3	2	1	3	3	2	1	3	3	6	6	6	109.99	962	962	1	19	0	91807	2.9	1.9	1.9	1.9	5	5	574050000	96385000	119310000	86534000	141340000	8969600	1506000	1864200	0.00125674	0.0011898
Exponential	tr|Q4E4C2|Q4E4C2_TRYCC	tr|Q4E4C2|Q4E4C2_TRYCC	4	4	4	>tr|Q4E4C2|Q4E4C2_TRYCC ATP-dependent DEAD/H RNA helicase, putative OS=Trypanosoma cruzi (strain CL Brener) GN=Tc00.1047053510187.290 PE=3 SV=1	1	4	4	4	9	1	0	4	4	1	0	4	4	1	0	4	4	10.6	10.6	10.6	66909	595	595	1	16	0	18.2	1.8	0	0	1.8	10.6	10.6	444060000	15946000	0	175700000	244880000	10327000	370840	0	0.000309461
Exponential	tr|Q4E2R4|Q4E2R4_TRYCC	tr|Q4E2R4|Q4E2R4_TRYCC	4	4	4	>tr|Q4E2R4|Q4E2R4_TRYCC Uncharacterized protein OS=Trypanosoma cruzi (strain CL Brener) GN=Tc00.1047053504153.190 PE=4 SV=1	1	4	4	4	9	1	1	4	3	1	1	4	3	1	1	4	3	9.7	9.7	9.7	81301	714	714	1	15	0	57399	1.5	1.5	4.1	4.1	9.7	7.1	237930000	7147200	17030000	66208000	101150000	5172400	155370	370220	0.000129654	0.000236289
Exponential	tr|Q4DG63|Q4DG63_TRYCC	tr|Q4DG63|Q4DG63_TRYCC	4	4	4	>tr|Q4DG63|Q4DG63_TRYCC Protein transport protein Sec23, putative OS=Trypanosoma cruzi (strain CL Brener) GN=Tc00.1047053511575.100 PE=4 SV=1	1	4	4	4	8	1	0	3	4	1	0	3	4	1	0	3	4	6.2	6.2	6.2	111.03	998	998	1	16	0	82272	1.4	0	2.7	0	4.9	6.2	325790000	4979600	0	104990000	198020000	7576500	115800	0	9.66337e-05
Exponential	tr|Q4DN72|Q4DN72_TRYCC;tr|Q4DL18|Q4DL18_TRYCC;tr|Q4DB26|Q4DB26_TRYCC	tr|Q4DN72|Q4DN72_TRYCC;tr|Q4DL18|Q4DL18_TRYCC;tr|Q4DB26|Q4DB26_TRYCC	3;3;3	3;3;3	3;3;3	>tr|Q4DN72|Q4DN72_TRYCC 60S ribosomal protein L34, putative OS=Trypanosoma cruzi (strain CL Brener) GN=Tc00.1047053511233.20 PE=4 SV=1;>tr|Q4DL18|Q4DL18_TRYCC 60S ribosomal protein L34, putative OS=Trypanosoma cruzi (strain CL Brener) GN=Tc00.1047053511261	3	3	3	3	7	1	1	2	3	1	1	2	3	1	1	2	3	14.1	14.1	14.1	19.48	170	170;171;171	1	18	0	5205	4.7	4.7	4.7	4.7	9.4	14.1	2124400000	414890000	276020000	213110000	1022900000	424880000	82979000	55204000	0.0692449	0.0352333
Exponential	tr|Q4D313|Q4D313_TRYCC;tr|Q4CYB0|Q4CYB0_TRYCC;tr|Q4CL15|Q4CL15_TRYCC	tr|Q4D313|Q4D313_TRYCC;tr|Q4CYB0|Q4CYB0_TRYCC;tr|Q4CL15|Q4CL15_TRYCC	3;3;2	3;3;2	3;3;2	>tr|Q4D313|Q4D313_TRYCC Ubiquitin hydrolase, putative OS=Trypanosoma cruzi (strain CL Brener) GN=Tc00.1047053506569.10 PE=3 SV=1;>tr|Q4CYB0|Q4CYB0_TRYCC Ubiquitin hydrolase, putative OS=Trypanosoma cruzi (strain CL Brener) GN=Tc00.1047053504443.10 PE=3 SV=	3	3	3	3	6	1	0	3	2	1	0	3	2	1	0	3	2	11	11	11	51766	464	464;464;207	1	9	0	72339	3	0	0	0	11	6	294000000	32186000	0	101280000	160530000	14700000	1609300	0	0.00134294
Exponential	tr|Q4DPX8|Q4DPX8_TRYCC;tr|Q4DBU2|Q4DBU2_TRYCC	tr|Q4DPX8|Q4DPX8_TRYCC;tr|Q4DBU2|Q4DBU2_TRYCC	3;3	3;3	3;3	>tr|Q4DPX8|Q4DPX8_TRYCC NAD(P)-dependent oxidoreductase, putative OS=Trypanosoma cruzi (strain CL Brener) GN=Tc00.1047053507049.60 PE=3 SV=1;>tr|Q4DBU2|Q4DBU2_TRYCC NAD(P)-dependent oxidoreductase, putative OS=Trypanosoma cruzi (strain CL Brener) GN=Tc00.1	2	3	3	3	10	2	2	3	3	2	2	3	3	2	2	3	3	7.5	7.5	7.5	28132	266	266;266	1	24	0.0031293	18779	4.5	7.1	4.5	7.5	7.5	7.5	576390000	65866000	111910000	100920000	198950000	36025000	4116600	6994500	0.00343525	0.00446416
Exponential	tr|Q4D551|Q4D551_TRYCC;tr|Q4DNL4|Q4DNL4_TRYCC	tr|Q4D551|Q4D551_TRYCC;tr|Q4DNL4|Q4DNL4_TRYCC	3;3	3;3	3;3	>tr|Q4D551|Q4D551_TRYCC Uncharacterized protein OS=Trypanosoma cruzi (strain CL Brener) GN=Tc00.1047053508525.10 PE=4 SV=1;>tr|Q4DNL4|Q4DNL4_TRYCC Uncharacterized protein OS=Trypanosoma cruzi (strain CL Brener) GN=Tc00.1047053507035.120 PE=4 SV=1	2	3	3	3	9	1	2	3	3	1	2	3	3	1	2	3	3	25.3	25.3	25.3	21988	186	186;239	1	23	0	11353	9.7	18.3	8.6	8.6	25.3	25.3	589260000	61619000	43853000	111840000	303070000	36829000	3851200	2740800	0.00321378	0.00174929
Exponential	tr|Q4DJ66|Q4DJ66_TRYCC;tr|Q4CZL3|Q4CZL3_TRYCC	tr|Q4DJ66|Q4DJ66_TRYCC;tr|Q4CZL3|Q4CZL3_TRYCC	3;3	3;3	3;3	>tr|Q4DJ66|Q4DJ66_TRYCC Uncharacterized protein OS=Trypanosoma cruzi (strain CL Brener) GN=Tc00.1047053505183.50 PE=4 SV=1;>tr|Q4CZL3|Q4CZL3_TRYCC Uncharacterized protein OS=Trypanosoma cruzi (strain CL Brener) GN=Tc00.1047053503789.70 PE=4 SV=1	2	3	3	3	9	2	2	3	2	2	2	3	2	2	2	3	2	15.3	15.3	15.3	37184	327	327;370	1	23	0	22519	9.2	10.4	4.3	4.3	15.3	10.4	264940000	25551000	61957000	46334000	95859000	13247000	1277600	3097800	0.00106614	0.00197714
Exponential	tr|Q4DZK8|Q4DZK8_TRYCC;tr|Q4DQE9|Q4DQE9_TRYCC	tr|Q4DZK8|Q4DZK8_TRYCC;tr|Q4DQE9|Q4DQE9_TRYCC	3;3	3;3	3;3	>tr|Q4DZK8|Q4DZK8_TRYCC Pumilio-repeat, RNA-binding protein, putative OS=Trypanosoma cruzi (strain CL Brener) GN=Tc00.1047053508799.70 PE=4 SV=1;>tr|Q4DQE9|Q4DQE9_TRYCC Pumilio-repeat, RNA-binding protein, putative OS=Trypanosoma cruzi (strain CL Brener) G	2	3	3	3	9	1	2	3	3	1	2	3	3	1	2	3	3	4.8	4.8	4.8	77566	694	694;694	1	17	0	49284	1.2	3	0	1.2	4.8	4.8	474350000	0	38475000	158240000	270090000	15302000	0	1241100		0.000792118
Exponential	tr|Q4DC71|Q4DC71_TRYCC;tr|Q4CW43|Q4CW43_TRYCC	tr|Q4DC71|Q4DC71_TRYCC;tr|Q4CW43|Q4CW43_TRYCC	3;3	3;3	3;3	>tr|Q4DC71|Q4DC71_TRYCC NGG1 interacting factor 3, putative OS=Trypanosoma cruzi (strain CL Brener) GN=Tc00.1047053506777.60 PE=4 SV=1;>tr|Q4CW43|Q4CW43_TRYCC NGG1 interacting factor 3, putative OS=Trypanosoma cruzi (strain CL Brener) GN=Tc00.1047053511163	2	3	3	3	9	2	1	3	3	2	1	3	3	2	1	3	3	20.3	20.3	20.3	31.02	286	286;286	1	20	0	51964	10.5	4.9	15.4	0	20.3	20.3	518700000	10245000	16312000	163550000	323120000	32419000	640340	1019500	0.000534356	0.000650685
Exponential	tr|Q4E0S3|Q4E0S3_TRYCC;tr|Q4CVL0|Q4CVL0_TRYCC	tr|Q4E0S3|Q4E0S3_TRYCC;tr|Q4CVL0|Q4CVL0_TRYCC	3;3	3;3	3;3	>tr|Q4E0S3|Q4E0S3_TRYCC dTDP-glucose 4,6-dehydratase, putative OS=Trypanosoma cruzi (strain CL Brener) GN=Tc00.1047053509965.380 PE=4 SV=1;>tr|Q4CVL0|Q4CVL0_TRYCC dTDP-glucose 4,6-dehydratase, putative OS=Trypanosoma cruzi (strain CL Brener) GN=Tc00.104705	2	3	3	3	8	1	2	3	2	1	2	3	2	1	2	3	2	20.9	20.9	20.9	36727	325	325;325	1	19	0	17115	2.8	9.8	9.8	9.8	20.9	9.8	623920000	84491000	139790000	57868000	219780000	34662000	4693900	7765900	0.003917	0.0049565
Exponential	tr|Q4D4U6|Q4D4U6_TRYCC;tr|Q4D6R4|Q4D6R4_TRYCC	tr|Q4D4U6|Q4D4U6_TRYCC;tr|Q4D6R4|Q4D6R4_TRYCC	3;3	3;3	3;3	>tr|Q4D4U6|Q4D4U6_TRYCC Aldehyde dehydrogenase, putative (Fragment) OS=Trypanosoma cruzi (strain CL Brener) GN=Tc00.1047053511523.100 PE=4 SV=1;>tr|Q4D6R4|Q4D6R4_TRYCC Aldehyde dehydrogenase, putative (Fragment) OS=Trypanosoma cruzi (strain CL Brener) GN=T	2	3	3	3	8	1	1	3	3	1	1	3	3	1	1	3	3	21.1	21.1	21.1	20902	194	194;219	1	16	0	4126	6.2	6.2	5.7	5.7	21.1	21.1	374850000	0	47522000	96577000	216060000	37485000	0	4752200		0.00303304
Exponential	tr|Q4DQ12|Q4DQ12_TRYCC;tr|Q4DE63|Q4DE63_TRYCC	tr|Q4DQ12|Q4DQ12_TRYCC;tr|Q4DE63|Q4DE63_TRYCC	3;3	3;3	3;3	>tr|Q4DQ12|Q4DQ12_TRYCC Calpain cysteine peptidase, putative OS=Trypanosoma cruzi (strain CL Brener) GN=Tc00.1047053510121.170 PE=3 SV=1;>tr|Q4DE63|Q4DE63_TRYCC Calpain cysteine peptidase, putative OS=Trypanosoma cruzi (strain CL Brener) GN=Tc00.1047053506	2	3	3	3	8	1	1	3	3	1	1	3	3	1	1	3	3	2.4	2.4	2.4	179.69	1592	1592;1592	1	13	0	51718	0.6	0.6	0.6	1.1	2.4	2.4	159990000	7756000	15428000	45122000	84633000	1927600	93446	185890	7.79795e-05	0.000118642
Exponential	tr|Q4E610|Q4E610_TRYCC;tr|Q4DR96|Q4DR96_TRYCC	tr|Q4E610|Q4E610_TRYCC;tr|Q4DR96|Q4DR96_TRYCC	3;3	3;3	3;3	>tr|Q4E610|Q4E610_TRYCC Peter pan protein, putative OS=Trypanosoma cruzi (strain CL Brener) GN=Tc00.1047053508153.830 PE=4 SV=1;>tr|Q4DR96|Q4DR96_TRYCC Peter pan protein, putative OS=Trypanosoma cruzi (strain CL Brener) GN=Tc00.1047053508181.130 PE=4 SV=1	2	3	3	3	7	2	1	2	2	2	1	2	2	2	1	2	2	8.5	8.5	8.5	41624	364	364;364	1	11	0	68618	4.9	1.9	1.9	1.9	6.6	6.6	260590000	35977000	22808000	56435000	106930000	10858000	1499100	950330	0.00125098	0.000606538
Exponential	tr|Q4DRV7|Q4DRV7_TRYCC;tr|Q4CYY8|Q4CYY8_TRYCC	tr|Q4DRV7|Q4DRV7_TRYCC;tr|Q4CYY8|Q4CYY8_TRYCC	3;3	3;3	3;3	>tr|Q4DRV7|Q4DRV7_TRYCC Uncharacterized protein OS=Trypanosoma cruzi (strain CL Brener) GN=Tc00.1047053507669.139 PE=4 SV=1;>tr|Q4CYY8|Q4CYY8_TRYCC Uncharacterized protein OS=Trypanosoma cruzi (strain CL Brener) GN=Tc00.1047053509877.60 PE=4 SV=1	2	3	3	3	7	1	1	3	2	1	1	3	2	1	1	3	2	10.4	10.4	10.4	30325	269	269;269	1	15	0	15085	4.5	4.5	4.5	4.5	10.4	10.4	103770000	2656300	38356000	14961000	13952000	6917700	177090	2557100	0.000147779	0.00163204
Exponential	tr|Q4DCC3|Q4DCC3_TRYCC;tr|Q4DYL5|Q4DYL5_TRYCC	tr|Q4DCC3|Q4DCC3_TRYCC;tr|Q4DYL5|Q4DYL5_TRYCC	3;3	3;3	3;3	>tr|Q4DCC3|Q4DCC3_TRYCC Uncharacterized protein (Fragment) OS=Trypanosoma cruzi (strain CL Brener) GN=Tc00.1047053508895.89 PE=4 SV=1;>tr|Q4DYL5|Q4DYL5_TRYCC Uncharacterized protein OS=Trypanosoma cruzi (strain CL Brener) GN=Tc00.1047053506211.30 PE=4 SV=1	2	3	3	3	7	0	1	3	3	0	1	3	3	0	1	3	3	8.6	8.6	8.6	54385	502	502;781	1	11	0	35.57	0	3.4	3.4	0	8.6	8.6	164920000	0	17272000	65489000	76164000	5890100	0	616860		0.000393704
Exponential	tr|Q4DWC8|Q4DWC8_TRYCC;tr|Q4DP70|Q4DP70_TRYCC	tr|Q4DWC8|Q4DWC8_TRYCC;tr|Q4DP70|Q4DP70_TRYCC	3;3	3;3	3;3	>tr|Q4DWC8|Q4DWC8_TRYCC Uncharacterized protein OS=Trypanosoma cruzi (strain CL Brener) GN=Tc00.1047053509733.60 PE=4 SV=1;>tr|Q4DP70|Q4DP70_TRYCC Uncharacterized protein OS=Trypanosoma cruzi (strain CL Brener) GN=Tc00.1047053509599.60 PE=4 SV=1	2	3	3	3	7	1	0	3	3	1	0	3	3	1	0	3	3	6.4	6.4	6.4	64813	592	592;593	1	18	0	63171	1.4	0	1.4	3.5	6.4	6.4	332710000	14912000	0	116500000	116910000	8755400	392430	0	0.000327478
Exponential	tr|Q4DLS6|Q4DLS6_TRYCC;tr|Q4DCR3|Q4DCR3_TRYCC	tr|Q4DLS6|Q4DLS6_TRYCC;tr|Q4DCR3|Q4DCR3_TRYCC	3;3	3;3	3;3	>tr|Q4DLS6|Q4DLS6_TRYCC Uncharacterized protein OS=Trypanosoma cruzi (strain CL Brener) GN=Tc00.1047053509153.40 PE=4 SV=1;>tr|Q4DCR3|Q4DCR3_TRYCC Uncharacterized protein OS=Trypanosoma cruzi (strain CL Brener) GN=Tc00.1047053510305.50 PE=4 SV=1	2	3	3	3	7	2	1	2	2	2	1	2	2	2	1	2	2	2.6	2.6	2.6	213.33	1924	1924;1925	1	23	0	16249	2	1.4	2	2.6	2	1.2	198250000	19502000	29197000	59250000	19338000	1962800	193090	289080	0.000161131	0.000184502
Exponential	tr|Q4DUF6|Q4DUF6_TRYCC;tr|Q4D8I8|Q4D8I8_TRYCC	tr|Q4DUF6|Q4DUF6_TRYCC;tr|Q4D8I8|Q4D8I8_TRYCC	3;3	3;3	3;3	>tr|Q4DUF6|Q4DUF6_TRYCC Uncharacterized protein OS=Trypanosoma cruzi (strain CL Brener) GN=Tc00.1047053508837.130 PE=4 SV=1;>tr|Q4D8I8|Q4D8I8_TRYCC Uncharacterized protein OS=Trypanosoma cruzi (strain CL Brener) GN=Tc00.1047053511383.40 PE=4 SV=1	2	3	3	3	7	0	1	3	3	0	1	3	3	0	1	3	3	8.6	8.6	8.6	69368	614	614;614	1	12	0	51205	0	2.8	0	0	8.6	8.6	146590000	0	8812300	33892000	103880000	3664600	0	220310		0.00014061
Exponential	tr|Q4DGD6|Q4DGD6_TRYCC;tr|Q4D438|Q4D438_TRYCC	tr|Q4DGD6|Q4DGD6_TRYCC;tr|Q4D438|Q4D438_TRYCC	3;3	3;3	3;3	>tr|Q4DGD6|Q4DGD6_TRYCC Serine/threonine-protein phosphatase OS=Trypanosoma cruzi (strain CL Brener) GN=Tc00.1047053503999.60 PE=3 SV=1;>tr|Q4D438|Q4D438_TRYCC Serine/threonine-protein phosphatase OS=Trypanosoma cruzi (strain CL Brener) GN=Tc00.10470535095	2	3	3	3	6	0	1	2	3	0	1	2	3	0	1	2	3	10.1	10.1	10.1	48214	434	434;434	1	11	0	87353	0	2.5	2.5	2.5	6.7	10.1	103970000	0	10046000	28374000	58752000	3585300	0	346410		0.000221092
Exponential	tr|Q4CXN1|Q4CXN1_TRYCC;tr|Q4CX05|Q4CX05_TRYCC	tr|Q4CXN1|Q4CXN1_TRYCC;tr|Q4CX05|Q4CX05_TRYCC	3;3	3;3	3;3	>tr|Q4CXN1|Q4CXN1_TRYCC Uncharacterized protein OS=Trypanosoma cruzi (strain CL Brener) GN=Tc00.1047053510293.30 PE=3 SV=1;>tr|Q4CX05|Q4CX05_TRYCC Uncharacterized protein OS=Trypanosoma cruzi (strain CL Brener) GN=Tc00.1047053508661.10 PE=3 SV=1	2	3	3	3	5	0	0	3	2	0	0	3	2	0	0	3	2	18	18	18	22568	200	200;200	1	7	0	28505	0	0	0	0	18	10.5	148360000	0	0	20101000	128250000	9890400	0	0
Exponential	tr|Q4E5Y7|Q4E5Y7_TRYCC;tr|Q4DTE6|Q4DTE6_TRYCC	tr|Q4E5Y7|Q4E5Y7_TRYCC;tr|Q4DTE6|Q4DTE6_TRYCC	3;3	3;3	3;3	>tr|Q4E5Y7|Q4E5Y7_TRYCC Uncharacterized protein OS=Trypanosoma cruzi (strain CL Brener) GN=Tc00.1047053508153.1080 PE=4 SV=1;>tr|Q4DTE6|Q4DTE6_TRYCC Uncharacterized protein OS=Trypanosoma cruzi (strain CL Brener) GN=Tc00.1047053510311.170 PE=4 SV=1	2	3	3	3	5	0	0	3	2	0	0	3	2	0	0	3	2	6.2	6.2	6.2	61924	549	549;550	1	7	0.0028139	19424	0	0	2.2	0	6.2	4.9	139430000	0	0	28895000	105790000	3575100	0	0
Exponential	tr|Q4DIM8|Q4DIM8_TRYCC;tr|Q4CSH0|Q4CSH0_TRYCC	tr|Q4DIM8|Q4DIM8_TRYCC;tr|Q4CSH0|Q4CSH0_TRYCC	3;3	3;3	3;3	>tr|Q4DIM8|Q4DIM8_TRYCC ADG1-like protein, putative OS=Trypanosoma cruzi (strain CL Brener) GN=Tc00.1047053509777.64 PE=4 SV=1;>tr|Q4CSH0|Q4CSH0_TRYCC ADG1, putative OS=Trypanosoma cruzi (strain CL Brener) GN=Tc00.1047053503563.14 PE=4 SV=1	2	3	3	3	4	0	0	2	2	0	0	2	2	0	0	2	2	24	24	24	13759	121	121;121	1	11	0	11498	0	0	14.9	8.3	24	24	198020000	0	0	59690000	124660000	28289000	0	0
Exponential	tr|Q4CP89|Q4CP89_TRYCC;tr|Q4D1Y9|Q4D1Y9_TRYCC;tr|Q4CYI0|Q4CYI0_TRYCC	tr|Q4CP89|Q4CP89_TRYCC;tr|Q4D1Y9|Q4D1Y9_TRYCC	3;2;1	3;2;1	3;2;1	>tr|Q4CP89|Q4CP89_TRYCC Uncharacterized protein OS=Trypanosoma cruzi (strain CL Brener) GN=Tc00.1047053506927.20 PE=4 SV=1;>tr|Q4D1Y9|Q4D1Y9_TRYCC Uncharacterized protein (Fragment) OS=Trypanosoma cruzi (strain CL Brener) GN=Tc00.1047053508505.4 PE=4 SV=1	3	3	3	3	7	1	1	3	2	1	1	3	2	1	1	3	2	4.7	4.7	4.7	95492	878	878;232;606	1	17	0	42467	1.8	1.8	1.8	1.8	4.7	3.3	615990000	80885000	182380000	123530000	154140000	12833000	1685100	3799600	0.0014062	0.00242505
Exponential	tr|Q4DHU1|Q4DHU1_TRYCC;tr|Q4D031|Q4D031_TRYCC	tr|Q4DHU1|Q4DHU1_TRYCC;tr|Q4D031|Q4D031_TRYCC	3;2	3;2	3;2	>tr|Q4DHU1|Q4DHU1_TRYCC Uncharacterized protein OS=Trypanosoma cruzi (strain CL Brener) GN=Tc00.1047053506177.10 PE=4 SV=1;>tr|Q4D031|Q4D031_TRYCC Uncharacterized protein OS=Trypanosoma cruzi (strain CL Brener) GN=Tc00.1047053506239.20 PE=4 SV=1	2	3	3	3	10	2	2	3	3	2	2	3	3	2	2	3	3	8.1	8.1	8.1	57131	518	518;518	1	21	0	19653	4.2	4.2	2.1	4.2	8.1	8.1	496140000	123310000	71322000	111600000	128880000	16005000	3977800	2300700	0.00331942	0.0014684
Exponential	tr|Q4D7L6|Q4D7L6_TRYCC;tr|Q4CTY6|Q4CTY6_TRYCC	tr|Q4D7L6|Q4D7L6_TRYCC;tr|Q4CTY6|Q4CTY6_TRYCC	3;2	3;2	3;2	>tr|Q4D7L6|Q4D7L6_TRYCC Serine/threonine-protein phosphatase OS=Trypanosoma cruzi (strain CL Brener) GN=Tc00.1047053509453.50 PE=3 SV=1;>tr|Q4CTY6|Q4CTY6_TRYCC Serine/threonine-protein phosphatase OS=Trypanosoma cruzi (strain CL Brener) GN=Tc00.10470535118	2	3	3	3	9	2	1	3	3	2	1	3	3	2	1	3	3	14.1	14.1	14.1	37894	340	340;340	1	20	0	82215	9.4	6.2	9.4	9.4	14.1	14.1	1156600000	122990000	76402000	77780000	246070000	64254000	6832900	4244600	0.00570197	0.00270907
Exponential	tr|Q4D9M1|Q4D9M1_TRYCC;tr|Q4DD45|Q4DD45_TRYCC	tr|Q4D9M1|Q4D9M1_TRYCC;tr|Q4DD45|Q4DD45_TRYCC	3;2	3;2	3;2	>tr|Q4D9M1|Q4D9M1_TRYCC Pescadillo homolog OS=Trypanosoma cruzi (strain CL Brener) GN=Tc00.1047053510579.30 PE=3 SV=1;>tr|Q4DD45|Q4DD45_TRYCC Pescadillo homolog OS=Trypanosoma cruzi (strain CL Brener) GN=Tc00.1047053510241.110 PE=3 SV=1	2	3	3	3	9	1	2	3	3	1	2	3	3	1	2	3	3	6.8	6.8	6.8	76706	662	662;662	1	17	0	16353	1.4	3.6	0	0	6.8	6.8	406800000	14513000	44968000	65602000	281720000	11623000	414640	1284800	0.000346012	0.000820009
Exponential	tr|Q4D814|Q4D814_TRYCC;tr|Q4DLV5|Q4DLV5_TRYCC	tr|Q4D814|Q4D814_TRYCC;tr|Q4DLV5|Q4DLV5_TRYCC	3;2	3;2	3;2	>tr|Q4D814|Q4D814_TRYCC Uncharacterized protein OS=Trypanosoma cruzi (strain CL Brener) GN=Tc00.1047053510243.80 PE=4 SV=1;>tr|Q4DLV5|Q4DLV5_TRYCC Uncharacterized protein OS=Trypanosoma cruzi (strain CL Brener) GN=Tc00.1047053510575.140 PE=4 SV=1	2	3	3	3	8	1	1	3	3	1	1	3	3	1	1	3	3	15.2	15.2	15.2	30385	263	263;266	1	15	0	25963	4.2	4.2	4.2	4.2	15.2	15.2	263430000	38175000	21153000	39346000	113800000	23948000	3470400	1923000	0.00289601	0.00122733
Exponential	tr|Q4D057|Q4D057_TRYCC;tr|Q4DAQ9|Q4DAQ9_TRYCC	tr|Q4D057|Q4D057_TRYCC;tr|Q4DAQ9|Q4DAQ9_TRYCC	3;2	3;2	3;2	>tr|Q4D057|Q4D057_TRYCC Uncharacterized protein OS=Trypanosoma cruzi (strain CL Brener) GN=Tc00.1047053510347.50 PE=4 SV=1;>tr|Q4DAQ9|Q4DAQ9_TRYCC Uncharacterized protein OS=Trypanosoma cruzi (strain CL Brener) GN=Tc00.1047053503925.20 PE=4 SV=1	2	3	3	3	8	1	1	3	3	1	1	3	3	1	1	3	3	9.9	9.9	9.9	51361	454	454;444	1	22	0	66136	3.7	3.7	3.7	3.7	9.9	9.9	463010000	64115000	50907000	105290000	164300000	22048000	3053100	2424100	0.00254777	0.00154715
Exponential	tr|Q4DRE0|Q4DRE0_TRYCC;tr|Q4DDK6|Q4DDK6_TRYCC	tr|Q4DRE0|Q4DRE0_TRYCC;tr|Q4DDK6|Q4DDK6_TRYCC	3;2	3;2	3;2	>tr|Q4DRE0|Q4DRE0_TRYCC Uncharacterized protein OS=Trypanosoma cruzi (strain CL Brener) GN=Tc00.1047053506503.56 PE=4 SV=1;>tr|Q4DDK6|Q4DDK6_TRYCC Uncharacterized protein OS=Trypanosoma cruzi (strain CL Brener) GN=Tc00.1047053511293.90 PE=4 SV=1	2	3	3	3	8	1	1	3	3	1	1	3	3	1	1	3	3	7.1	7.1	7.1	59025	539	539;539	1	13	0	69409	2	2.6	2.6	0	7.1	7.1	171620000	4692100	24186000	56621000	76772000	6356300	173780	895770	0.000145017	0.000571715
Exponential	tr|Q4DNI1|Q4DNI1_TRYCC;tr|Q4CMM7|Q4CMM7_TRYCC	tr|Q4DNI1|Q4DNI1_TRYCC;tr|Q4CMM7|Q4CMM7_TRYCC	3;2	3;2	3;2	>tr|Q4DNI1|Q4DNI1_TRYCC Uncharacterized protein OS=Trypanosoma cruzi (strain CL Brener) GN=Tc00.1047053509791.160 PE=4 SV=1;>tr|Q4CMM7|Q4CMM7_TRYCC Uncharacterized protein (Fragment) OS=Trypanosoma cruzi (strain CL Brener) GN=Tc00.1047053508721.20 PE=4 SV=	2	3	3	3	8	1	1	3	3	1	1	3	3	1	1	3	3	4.2	4.2	4.2	179.97	1627	1627;240	1	15	0	40192	1.2	0.9	2	0.9	4.2	4.2	311850000	18523000	34031000	81976000	140330000	3803100	225890	415010	0.000188502	0.000264876
Exponential	tr|Q4D4H3|Q4D4H3_TRYCC;tr|Q4D4W9|Q4D4W9_TRYCC	tr|Q4D4H3|Q4D4H3_TRYCC;tr|Q4D4W9|Q4D4W9_TRYCC	3;2	3;2	3;2	>tr|Q4D4H3|Q4D4H3_TRYCC Uncharacterized protein OS=Trypanosoma cruzi (strain CL Brener) GN=Tc00.1047053506399.70 PE=4 SV=1;>tr|Q4D4W9|Q4D4W9_TRYCC Uncharacterized protein OS=Trypanosoma cruzi (strain CL Brener) GN=Tc00.1047053511909.60 PE=4 SV=1	2	3	3	3	7	1	1	3	2	1	1	3	2	1	1	3	2	15.6	15.6	15.6	36997	321	321;320	1	20	0	63088	3.1	3.1	8.7	8.7	15.6	8.7	777460000	102390000	141770000	105800000	144170000	40919000	5389100	7461800	0.00449714	0.00476241
Exponential	tr|Q4DX03|Q4DX03_TRYCC;tr|Q4DQT7|Q4DQT7_TRYCC	tr|Q4DX03|Q4DX03_TRYCC;tr|Q4DQT7|Q4DQT7_TRYCC	3;2	3;2	3;2	>tr|Q4DX03|Q4DX03_TRYCC Uncharacterized protein OS=Trypanosoma cruzi (strain CL Brener) GN=Tc00.1047053510533.110 PE=4 SV=1;>tr|Q4DQT7|Q4DQT7_TRYCC Uncharacterized protein OS=Trypanosoma cruzi (strain CL Brener) GN=Tc00.1047053511821.100 PE=4 SV=1	2	3	3	3	7	1	2	2	2	1	2	2	2	1	2	2	2	4.6	4.6	4.6	89.6	798	798;802	1	18	0	25645	1.3	2.4	2.4	2.4	3.5	3.5	517280000	31369000	131240000	48220000	161370000	8918600	540840	2262700	0.000451324	0.00144414
Exponential	tr|Q4CY71|Q4CY71_TRYCC;tr|Q4DPI2|Q4DPI2_TRYCC	tr|Q4CY71|Q4CY71_TRYCC;tr|Q4DPI2|Q4DPI2_TRYCC	3;2	3;2	3;2	>tr|Q4CY71|Q4CY71_TRYCC Uncharacterized protein OS=Trypanosoma cruzi (strain CL Brener) GN=Tc00.1047053511323.60 PE=4 SV=1;>tr|Q4DPI2|Q4DPI2_TRYCC Uncharacterized protein OS=Trypanosoma cruzi (strain CL Brener) GN=Tc00.1047053506513.180 PE=4 SV=1	2	3	3	3	7	0	2	3	2	0	2	3	2	0	2	3	2	8.5	8.5	8.5	62653	578	578;578	1	11	0	25319	0	4.5	2.1	2.1	8.5	6.4	182700000	0	36725000	53178000	52622000	5075100	0	1020100		0.000651067
Exponential	tr|Q4DWW6|Q4DWW6_TRYCC;tr|Q4E4I0|Q4E4I0_TRYCC	tr|Q4DWW6|Q4DWW6_TRYCC;tr|Q4E4I0|Q4E4I0_TRYCC	3;2	3;2	3;2	>tr|Q4DWW6|Q4DWW6_TRYCC Uncharacterized protein OS=Trypanosoma cruzi (strain CL Brener) GN=Tc00.1047053510729.210 PE=4 SV=1;>tr|Q4E4I0|Q4E4I0_TRYCC Uncharacterized protein OS=Trypanosoma cruzi (strain CL Brener) GN=Tc00.1047053506885.204 PE=4 SV=1	2	3	3	3	7	0	1	3	3	0	1	3	3	0	1	3	3	16.2	16.2	16.2	35036	315	315;315	1	19	0	89667	0	6.7	0	0	16.2	16.2	682730000	0	0	250510000	432210000	31033000	0	0
Exponential	tr|Q4D6L8|Q4D6L8_TRYCC;tr|Q4CXN4|Q4CXN4_TRYCC	tr|Q4D6L8|Q4D6L8_TRYCC;tr|Q4CXN4|Q4CXN4_TRYCC	3;2	3;2	3;2	>tr|Q4D6L8|Q4D6L8_TRYCC Protein kinase, putative OS=Trypanosoma cruzi (strain CL Brener) GN=Tc00.1047053504883.10 PE=4 SV=1;>tr|Q4CXN4|Q4CXN4_TRYCC Protein kinase, putative OS=Trypanosoma cruzi (strain CL Brener) GN=Tc00.1047053510045.30 PE=4 SV=1	2	3	3	3	6	0	1	2	3	0	1	2	3	0	1	2	3	9.5	9.5	9.5	75934	683	683;683	1	11	0	13113	0	2	0	2	5	9.5	252410000	0	15173000	70144000	158770000	8142100	0	489460		0.000312392
Exponential	tr|Q4D4P8|Q4D4P8_TRYCC;tr|Q4CUR5|Q4CUR5_TRYCC	tr|Q4D4P8|Q4D4P8_TRYCC;tr|Q4CUR5|Q4CUR5_TRYCC	3;2	3;2	3;2	>tr|Q4D4P8|Q4D4P8_TRYCC Uncharacterized protein OS=Trypanosoma cruzi (strain CL Brener) GN=Tc00.1047053506229.64 PE=4 SV=1;>tr|Q4CUR5|Q4CUR5_TRYCC Uncharacterized protein OS=Trypanosoma cruzi (strain CL Brener) GN=Tc00.1047053511571.20 PE=4 SV=1	2	3	3	3	5	0	0	2	3	0	0	2	3	0	0	2	3	15.8	15.8	15.8	31512	297	297;297	1	7	0.00037665	23718	0	0	0	0	10.1	15.8	298870000	0	0	117520000	181350000	27170000	0	0
Exponential	tr|Q4D7L3|Q4D7L3_TRYCC;tr|Q4DEF8|Q4DEF8_TRYCC	tr|Q4D7L3|Q4D7L3_TRYCC;tr|Q4DEF8|Q4DEF8_TRYCC	3;2	3;2	3;2	>tr|Q4D7L3|Q4D7L3_TRYCC Uncharacterized protein OS=Trypanosoma cruzi (strain CL Brener) GN=Tc00.1047053509453.79 PE=4 SV=1;>tr|Q4DEF8|Q4DEF8_TRYCC Uncharacterized protein OS=Trypanosoma cruzi (strain CL Brener) GN=Tc00.1047053503879.110 PE=4 SV=1	2	3	3	3	5	0	0	3	2	0	0	3	2	0	0	3	2	6.4	6.4	6.4	83246	766	766;767	1	11	0	17224	0	0	2.3	0	6.4	4.6	220810000	0	0	36846000	179260000	6308900	0	0
Exponential	tr|Q4D4W4|Q4D4W4_TRYCC;tr|Q4DRJ2|Q4DRJ2_TRYCC	tr|Q4D4W4|Q4D4W4_TRYCC	3;1	3;1	3;1	>tr|Q4D4W4|Q4D4W4_TRYCC Ubiquitin-fold modifier 1 OS=Trypanosoma cruzi (strain CL Brener) GN=Tc00.1047053507275.24 PE=3 SV=1	2	3	3	3	7	1	2	2	2	1	2	2	2	1	2	2	2	33.7	33.7	33.7	10.36	98	98;98	1	17	0	13946	14.3	18.4	14.3	14.3	29.6	29.6	608720000	40911000	77895000	140450000	196950000	101450000	6818500	12982000	0.00568995	0.00828562
Exponential	sp|Q4D6B2|MTNA2_TRYCC;sp|Q4CY36|MTNA1_TRYCC	sp|Q4D6B2|MTNA2_TRYCC	3;1	3;1	3;1	>sp|Q4D6B2|MTNA2_TRYCC Methylthioribose-1-phosphate isomerase 2 OS=Trypanosoma cruzi (strain CL Brener) GN=Tc00.1047053508269.30 PE=3 SV=1	2	3	3	3	7	1	1	3	2	1	1	3	2	1	1	3	2	12.4	12.4	12.4	39794	372	372;372	1	13	0	32065	4.3	4.3	0	8.6	12.4	8.1	256000000	43190000	27108000	51284000	123030000	11636000	1963200	1232200	0.00163827	0.000786438
Exponential	tr|Q4DSI9|Q4DSI9_TRYCC;tr|Q4E3S3|Q4E3S3_TRYCC	tr|Q4DSI9|Q4DSI9_TRYCC	3;1	3;1	3;1	>tr|Q4DSI9|Q4DSI9_TRYCC Uncharacterized protein OS=Trypanosoma cruzi (strain CL Brener) GN=Tc00.1047053508543.120 PE=4 SV=1	2	3	3	3	6	1	0	2	3	1	0	2	3	1	0	2	3	17.5	17.5	17.5	24141	228	228;228	1	12	0	20838	6.6	0	6.6	7	13.6	17.5	182540000	11199000	0	55479000	104350000	10738000	658790	0	0.000549752
Exponential	tr|Q4DSZ0|Q4DSZ0_TRYCC;tr|Q4CKB9|Q4CKB9_TRYCC	tr|Q4DSZ0|Q4DSZ0_TRYCC	3;1	3;1	1;1	>tr|Q4DSZ0|Q4DSZ0_TRYCC Uncharacterized protein OS=Trypanosoma cruzi (strain CL Brener) GN=Tc00.1047053504769.80 PE=4 SV=1	2	3	3	1	6	0	1	2	3	0	1	2	3	0	0	0	1	5.3	5.3	1.7	93451	808	808;244	1	10	0	55682	0	1.7	0	0	3.6	5.3	145590000	0	11005000	32006000	102570000	2310900	0	174690		0.000111494
Exponential	tr|Q4CXN2|Q4CXN2_TRYCC;tr|Q4CWR0|Q4CWR0_TRYCC	tr|Q4CXN2|Q4CXN2_TRYCC	3;1	3;1	3;1	>tr|Q4CXN2|Q4CXN2_TRYCC Cytosolic factor SEC14, putative OS=Trypanosoma cruzi (strain CL Brener) GN=Tc00.1047053510293.20 PE=4 SV=1	2	3	3	3	6	0	0	3	3	0	0	3	3	0	0	3	3	9.9	9.9	9.9	44847	395	395;395	1	11	0	31151	0	0	0	2.8	9.9	9.9	303380000	0	0	130000000	166150000	11668000	0	0
Exponential	tr|Q4E2U5|Q4E2U5_TRYCC;tr|Q4DK19|Q4DK19_TRYCC	tr|Q4E2U5|Q4E2U5_TRYCC	3;1	3;1	3;1	>tr|Q4E2U5|Q4E2U5_TRYCC Uncharacterized protein OS=Trypanosoma cruzi (strain CL Brener) GN=Tc00.1047053511283.160 PE=4 SV=1	2	3	3	3	6	0	0	3	3	0	0	3	3	0	0	3	3	4.5	4.5	4.5	117.52	1086	1086;100	1	10	0	36561	0	0	0	0	4.5	4.5	115730000	0	0	48906000	66828000	1702000	0	0
Exponential	tr|Q4DZK3|Q4DZK3_TRYCC	tr|Q4DZK3|Q4DZK3_TRYCC	3	2	2	>tr|Q4DZK3|Q4DZK3_TRYCC Amino acid permease/transporter, putative OS=Trypanosoma cruzi (strain CL Brener) GN=Tc00.1047053508799.120 PE=4 SV=1	1	3	2	2	10	2	2	3	3	1	1	2	2	1	1	2	2	8	6.2	6.2	55733	502	502	1	13	0	16744	7.8	7.8	1.8	7.8	8	8	514520000	76860000	78803000	148430000	210430000	39578000	5912300	6061800	0.00493374	0.00386888
Exponential	tr|Q4E2S5|Q4E2S5_TRYCC	tr|Q4E2S5|Q4E2S5_TRYCC	3	1	1	>tr|Q4E2S5|Q4E2S5_TRYCC Uncharacterized protein OS=Trypanosoma cruzi (strain CL Brener) GN=Tc00.1047053504153.30 PE=4 SV=1	1	3	1	1	10	2	2	3	3	0	0	1	1	0	0	1	1	18.6	5.9	5.9	30538	269	269	1	10	0	20784	12.6	12.6	18.6	18.6	18.6	18.6	173420000	0	0	56842000	67742000	10839000	0	0
Exponential	tr|Q4CPJ0|Q4CPJ0_TRYCC	tr|Q4CPJ0|Q4CPJ0_TRYCC	3	2	2	>tr|Q4CPJ0|Q4CPJ0_TRYCC Thioredoxin, putative (Fragment) OS=Trypanosoma cruzi (strain CL Brener) GN=Tc00.1047053510949.20 PE=4 SV=1	1	3	2	2	9	2	2	3	2	1	1	2	2	1	1	2	2	43.2	32.8	32.8	13988	125	125	1	16	0	24287	24	24	24	24	43.2	32.8	417680000	50516000	71568000	98177000	131050000	52210000	6314500	8946000	0.00526937	0.00570968
Exponential	tr|Q4DI62|Q4DI62_TRYCC	tr|Q4DI62|Q4DI62_TRYCC	3	3	2	>tr|Q4DI62|Q4DI62_TRYCC Pumilio/PUF RNA binding protein 2, putative OS=Trypanosoma cruzi (strain CL Brener) GN=Tc00.1047053507831.110 PE=4 SV=1	1	3	3	2	9	2	2	3	2	2	2	3	2	1	1	2	1	4.3	4.3	3.4	98937	885	885	1	19	0	40783	2.3	2.3	1.4	1.4	4.3	2.9	401310000	51173000	82936000	70702000	136040000	8189900	1044400	1692600	0.000871539	0.00108028
Exponential	tr|Q4CXN7|Q4CXN7_TRYCC	tr|Q4CXN7|Q4CXN7_TRYCC	3	3	1	>tr|Q4CXN7|Q4CXN7_TRYCC Transcription elongation factor S-II, putative OS=Trypanosoma cruzi (strain CL Brener) GN=Tc00.1047053511115.40 PE=4 SV=1	1	3	3	1	8	2	1	2	3	2	1	2	3	1	0	1	1	11.9	11.9	5.9	52861	477	477	1	17	0	29374	8.8	2.9	2.9	6.1	9	11.9	569410000	100760000	109260000	66008000	223580000	16269000	2878900	3121600	0.00240241	0.00199233
Exponential	tr|Q4DPB1|Q4DPB1_TRYCC	tr|Q4DPB1|Q4DPB1_TRYCC	3	3	3	>tr|Q4DPB1|Q4DPB1_TRYCC Guanylate kinase, putative OS=Trypanosoma cruzi (strain CL Brener) GN=Tc00.1047053509647.70 PE=4 SV=1	1	3	3	3	8	1	1	3	3	1	1	3	3	1	1	3	3	18.4	18.4	18.4	23367	206	206	1	18	0	7369	5.3	5.3	5.3	5.3	18.4	18.4	344860000	12748000	50090000	99927000	171550000	22991000	849890	3339300	0.000709223	0.00213127
Exponential	tr|Q4DJ59|Q4DJ59_TRYCC	tr|Q4DJ59|Q4DJ59_TRYCC	3	3	3	>tr|Q4DJ59|Q4DJ59_TRYCC Aldo/keto reductase, putative OS=Trypanosoma cruzi (strain CL Brener) GN=Tc00.1047053505183.120 PE=4 SV=1	1	3	3	3	8	2	1	2	3	2	1	2	3	2	1	2	3	12.7	12.7	12.7	35922	322	322	1	13	0	33181	7.8	4	0	0	7.8	12.7	237880000	17256000	26814000	91423000	102380000	13215000	958690	1489700	0.000800015	0.000950784
Exponential	tr|Q4DKZ2|Q4DKZ2_TRYCC	tr|Q4DKZ2|Q4DKZ2_TRYCC	3	3	3	>tr|Q4DKZ2|Q4DKZ2_TRYCC SNF-7-like protein, putative OS=Trypanosoma cruzi (strain CL Brener) GN=Tc00.1047053506957.110 PE=3 SV=1	1	3	3	3	8	1	1	3	3	1	1	3	3	1	1	3	3	22.2	22.2	22.2	25514	221	221	1	22	0	73703	6.8	5.4	12.2	16.7	22.2	22.2	504260000	9933400	19527000	156180000	239310000	38789000	764110	1502100	0.00063764	0.000958699
Exponential	tr|Q4E4C5|Q4E4C5_TRYCC	tr|Q4E4C5|Q4E4C5_TRYCC	3	3	3	>tr|Q4E4C5|Q4E4C5_TRYCC Uncharacterized protein OS=Trypanosoma cruzi (strain CL Brener) GN=Tc00.1047053510187.260 PE=4 SV=1	1	3	3	3	8	1	1	3	3	1	1	3	3	1	1	3	3	13.9	13.9	13.9	26419	238	238	1	16	0	22064	7.1	6.3	0	6.3	13.9	13.9	221190000	10232000	22480000	82473000	95546000	14746000	682120	1498700	0.000569221	0.000956529
Exponential	tr|Q4DMS9|Q4DMS9_TRYCC	tr|Q4DMS9|Q4DMS9_TRYCC	3	3	1	>tr|Q4DMS9|Q4DMS9_TRYCC Ribosomal protein L27, putative OS=Trypanosoma cruzi (strain CL Brener) GN=Tc00.1047053511545.20 PE=4 SV=1	1	3	3	1	8	1	1	3	3	1	1	3	3	0	0	1	1	15.9	15.9	5.3	17783	151	151	1	12	0	26241	6.6	6.6	4	5.3	15.9	15.9	994520000	3068600	6456400	404780000	489160000	99452000	306860	645640	0.000256071	0.000412073
Exponential	tr|Q4CSL1|Q4CSL1_TRYCC	tr|Q4CSL1|Q4CSL1_TRYCC	3	3	3	>tr|Q4CSL1|Q4CSL1_TRYCC 40S ribosomal protein S12 OS=Trypanosoma cruzi (strain CL Brener) GN=Tc00.1047053503395.50 PE=3 SV=1	1	3	3	3	7	1	1	3	2	1	1	3	2	1	1	3	2	26.2	26.2	26.2	15.77	141	141	1	16	0	12256	8.5	8.5	8.5	8.5	26.2	17.7	855760000	104490000	123440000	228680000	200700000	95085000	11610000	13716000	0.0096884	0.00875408
Exponential	tr|Q4DXD7|Q4DXD7_TRYCC	tr|Q4DXD7|Q4DXD7_TRYCC	3	3	1	>tr|Q4DXD7|Q4DXD7_TRYCC Uncharacterized protein OS=Trypanosoma cruzi (strain CL Brener) GN=Tc00.1047053508879.210 PE=4 SV=1	1	3	3	1	7	1	1	2	3	1	1	2	3	0	0	1	1	6.9	6.9	3	63261	565	565	1	16	0	54538	1.9	1.9	1.9	5	5	6.9	430690000	65106000	76813000	55111000	153270000	16565000	2504100	2954300	0.00208964	0.00188555
Exponential	tr|Q4DC98|Q4DC98_TRYCC	tr|Q4DC98|Q4DC98_TRYCC	3	3	3	>tr|Q4DC98|Q4DC98_TRYCC Uncharacterized protein OS=Trypanosoma cruzi (strain CL Brener) GN=Tc00.1047053511837.60 PE=4 SV=1	1	3	3	3	7	1	1	3	2	1	1	3	2	1	1	3	2	11.8	11.8	11.8	32982	305	305	1	15	0	38933	5.6	5.6	5.6	5.6	11.8	11.5	183870000	32277000	36965000	38017000	40238000	12258000	2151800	2464300	0.00179565	0.00157281
Exponential	tr|Q4DYS2|Q4DYS2_TRYCC	tr|Q4DYS2|Q4DYS2_TRYCC	3	3	3	>tr|Q4DYS2|Q4DYS2_TRYCC Uncharacterized protein OS=Trypanosoma cruzi (strain CL Brener) GN=Tc00.1047053507641.50 PE=4 SV=1	1	3	3	3	7	0	1	3	3	0	1	3	3	0	1	3	3	10.9	10.9	10.9	55112	497	497	1	9	0	36526	0	3.4	3.4	0	10.9	10.9	216880000	0	23459000	34524000	152010000	14459000	0	1563900		0.000998142
Exponential	tr|Q4DU65|Q4DU65_TRYCC	tr|Q4DU65|Q4DU65_TRYCC	3	3	3	>tr|Q4DU65|Q4DU65_TRYCC Transmembrane 9 superfamily member OS=Trypanosoma cruzi (strain CL Brener) GN=Tc00.1047053511391.90 PE=3 SV=1	1	3	3	3	7	1	1	2	3	1	1	2	3	1	1	2	3	4.8	4.8	4.8	72336	629	629	1	14	0	49956	2.2	2.2	2.2	2.2	4.8	4.8	212920000	18045000	43793000	67066000	61263000	8516900	721810	1751700	0.000602342	0.001118
Exponential	tr|Q4D4T8|Q4D4T8_TRYCC	tr|Q4D4T8|Q4D4T8_TRYCC	3	3	3	>tr|Q4D4T8|Q4D4T8_TRYCC Uncharacterized protein (Fragment) OS=Trypanosoma cruzi (strain CL Brener) GN=Tc00.1047053504253.10 PE=4 SV=1	1	3	3	3	7	1	1	3	2	1	1	3	2	1	1	3	2	4.2	4.2	4.2	142.19	1297	1297	1	17	0	63696	0.9	0.9	0.9	0.9	4.2	3.1	424620000	41728000	66141000	111780000	164350000	7321100	719450	1140400	0.000600372	0.000727848
Exponential	tr|Q4E2L2|Q4E2L2_TRYCC	tr|Q4E2L2|Q4E2L2_TRYCC	3	3	3	>tr|Q4E2L2|Q4E2L2_TRYCC Pumilio/PUF RNA binding protein 8, putative OS=Trypanosoma cruzi (strain CL Brener) GN=Tc00.1047053508479.120 PE=4 SV=1	1	3	3	3	7	0	1	3	3	0	1	3	3	0	1	3	3	7.2	7.2	7.2	65807	583	583	1	12	0	11273	0	2.2	0	0	7.2	7.2	420930000	0	30806000	167720000	222400000	12380000	0	906070		0.000578289
Exponential	tr|Q4DUR0|Q4DUR0_TRYCC	tr|Q4DUR0|Q4DUR0_TRYCC	3	3	3	>tr|Q4DUR0|Q4DUR0_TRYCC TatD related deoxyribonuclease, putative OS=Trypanosoma cruzi (strain CL Brener) GN=Tc00.1047053504149.40 PE=4 SV=1	1	3	3	3	7	1	1	3	2	1	1	3	2	1	1	3	2	10.2	10.2	10.2	37532	333	333	1	13	0.0018362	22085	3	3	3	3	10.2	7.2	182220000	8588400	21306000	87601000	55960000	6748800	318090	789110	0.000265442	0.000503641
Exponential	tr|Q4E135|Q4E135_TRYCC	tr|Q4E135|Q4E135_TRYCC	3	3	3	>tr|Q4E135|Q4E135_TRYCC Beta-adaptin, putative OS=Trypanosoma cruzi (strain CL Brener) GN=Tc00.1047053506247.200 PE=4 SV=1	1	3	3	3	6	0	0	3	3	0	0	3	3	0	0	3	3	4.9	4.9	4.9	106.18	965	965	1	10	0	46732	0	0	0	1.1	4.9	4.9	164760000	0	0	59694000	102120000	3108700	0	0
Exponential	tr|Q4DEN7|Q4DEN7_TRYCC	tr|Q4DEN7|Q4DEN7_TRYCC	3	3	2	>tr|Q4DEN7|Q4DEN7_TRYCC ATP-dependent RNA helicase, putative OS=Trypanosoma cruzi (strain CL Brener) GN=Tc00.1047053510819.110 PE=4 SV=1	1	3	3	2	5	0	1	2	2	0	1	2	2	0	1	2	2	4.9	4.9	3.9	85281	761	761	1	11	0	51311	0	1.6	0.9	2.4	3.9	3.9	202720000	0	11592000	37196000	149360000	5334600	0	305060		0.000194701
Exponential	tr|Q4CSV8|Q4CSV8_TRYCC;tr|Q4CRZ4|Q4CRZ4_TRYCC;tr|Q4DBC4|Q4DBC4_TRYCC	tr|Q4CSV8|Q4CSV8_TRYCC;tr|Q4CRZ4|Q4CRZ4_TRYCC;tr|Q4DBC4|Q4DBC4_TRYCC	2;2;1	2;2;1	2;2;1	>tr|Q4CSV8|Q4CSV8_TRYCC Dihydroorotase, putative OS=Trypanosoma cruzi (strain CL Brener) GN=Tc00.1047053508373.20 PE=4 SV=1;>tr|Q4CRZ4|Q4CRZ4_TRYCC Dihydroorotase, putative OS=Trypanosoma cruzi (strain CL Brener) GN=Tc00.1047053506747.20 PE=4 SV=1;>tr|Q4DB	3	2	2	2	5	0	1	2	2	0	1	2	2	0	1	2	2	7.6	7.6	7.6	42077	383	383;383;388	1	8	0	59185	0	3.7	0	3.9	7.6	7.6	141120000	0	29890000	52811000	56083000	7055800	0	1494500		0.000953848
Exponential	tr|Q4DQD4|Q4DQD4_TRYCC;tr|Q4DFW0|Q4DFW0_TRYCC	tr|Q4DQD4|Q4DQD4_TRYCC;tr|Q4DFW0|Q4DFW0_TRYCC	2;2	2;2	2;2	>tr|Q4DQD4|Q4DQD4_TRYCC Uncharacterized protein OS=Trypanosoma cruzi (strain CL Brener) GN=Tc00.1047053506629.100 PE=4 SV=1;>tr|Q4DFW0|Q4DFW0_TRYCC Uncharacterized protein OS=Trypanosoma cruzi (strain CL Brener) GN=Tc00.1047053506367.170 PE=4 SV=1	2	2	2	2	8	2	2	2	2	2	2	2	2	2	2	2	2	4.8	4.8	4.8	52914	457	457;457	1	14	0	3837	4.8	4.8	2.8	4.8	4.8	4.8	128720000	17840000	1596500	30006000	19299000	4152300	575500	51501	0.000480248	3.28699e-05
Exponential	tr|Q4DQM2|Q4DQM2_TRYCC;tr|Q4DM00|Q4DM00_TRYCC	tr|Q4DQM2|Q4DQM2_TRYCC;tr|Q4DM00|Q4DM00_TRYCC	2;2	2;2	2;2	>tr|Q4DQM2|Q4DQM2_TRYCC Uncharacterized protein OS=Trypanosoma cruzi (strain CL Brener) GN=Tc00.1047053509109.140 PE=4 SV=1;>tr|Q4DM00|Q4DM00_TRYCC Uncharacterized protein OS=Trypanosoma cruzi (strain CL Brener) GN=Tc00.1047053510603.40 PE=4 SV=1	2	2	2	2	7	1	2	2	2	1	2	2	2	1	2	2	2	4.4	4.4	4.4	54143	473	473;473	1	22	0	3254	2.7	4.4	4.4	4.4	4.4	4.4	900060000	25217000	170870000	148140000	267460000	32145000	900600	6102600	0.00075154	0.00389492
Exponential	tr|Q4CXJ2|Q4CXJ2_TRYCC;tr|Q4D087|Q4D087_TRYCC	tr|Q4CXJ2|Q4CXJ2_TRYCC;tr|Q4D087|Q4D087_TRYCC	2;2	2;2	2;2	>tr|Q4CXJ2|Q4CXJ2_TRYCC Ribosomal protein L3 mitochondrial, putative (Fragment) OS=Trypanosoma cruzi (strain CL Brener) GN=Tc00.1047053510645.49 PE=4 SV=1;>tr|Q4D087|Q4D087_TRYCC Mitochondrial ribosomal protein L3, putative OS=Trypanosoma cruzi (strain CL	2	2	2	2	6	1	1	2	2	1	1	2	2	1	1	2	2	22.6	22.6	22.6	19.16	164	164;473	1	16	0	40852	11	11	11	11	22.6	22.6	576850000	98987000	124960000	73283000	172890000	72106000	12373000	15619000	0.0103251	0.00996865
Exponential	tr|Q4DS65|Q4DS65_TRYCC;tr|Q4DL53|Q4DL53_TRYCC	tr|Q4DS65|Q4DS65_TRYCC;tr|Q4DL53|Q4DL53_TRYCC	2;2	2;2	2;2	>tr|Q4DS65|Q4DS65_TRYCC Derlin OS=Trypanosoma cruzi (strain CL Brener) GN=Tc00.1047053508777.80 PE=3 SV=1;>tr|Q4DL53|Q4DL53_TRYCC Derlin OS=Trypanosoma cruzi (strain CL Brener) GN=Tc00.1047053509029.110 PE=3 SV=1	2	2	2	2	6	1	1	2	2	1	1	2	2	1	1	2	2	12.3	12.3	12.3	28443	252	252;252	1	14	0	41899	2.8	9.5	2.8	12.3	12.3	12.3	468570000	59881000	86499000	105630000	179240000	78094000	9980200	14416000	0.00832835	0.00920085
Exponential	tr|Q4DFA1|Q4DFA1_TRYCC;tr|Q4DDZ3|Q4DDZ3_TRYCC	tr|Q4DFA1|Q4DFA1_TRYCC;tr|Q4DDZ3|Q4DDZ3_TRYCC	2;2	2;2	2;2	>tr|Q4DFA1|Q4DFA1_TRYCC Thioredoxin-like protein, putative OS=Trypanosoma cruzi (strain CL Brener) GN=Tc00.1047053511179.100 PE=4 SV=1;>tr|Q4DDZ3|Q4DDZ3_TRYCC Thioredoxin-like protein, putative OS=Trypanosoma cruzi (strain CL Brener) GN=Tc00.1047053508303.	2	2	2	2	6	1	1	2	2	1	1	2	2	1	1	2	2	11.7	11.7	11.7	29348	257	257;257	1	19	0	29061	4.3	4.3	4.3	4.3	11.7	11.7	767620000	136160000	169400000	147150000	198240000	47976000	8510000	10587000	0.00710149	0.00675703
Exponential	tr|Q4DBJ5|Q4DBJ5_TRYCC;tr|Q4DAJ4|Q4DAJ4_TRYCC	tr|Q4DBJ5|Q4DBJ5_TRYCC;tr|Q4DAJ4|Q4DAJ4_TRYCC	2;2	2;2	2;2	>tr|Q4DBJ5|Q4DBJ5_TRYCC Uncharacterized protein OS=Trypanosoma cruzi (strain CL Brener) GN=Tc00.1047053507041.50 PE=4 SV=1;>tr|Q4DAJ4|Q4DAJ4_TRYCC Uncharacterized protein OS=Trypanosoma cruzi (strain CL Brener) GN=Tc00.1047053508273.70 PE=4 SV=1	2	2	2	2	6	1	1	2	2	1	1	2	2	1	1	2	2	36	36	36	14059	125	125;125	1	16	0	71401	8	8	8	8	36	36	728140000	103470000	56803000	132530000	329020000	80905000	11496000	6311400	0.00959327	0.00402818
Exponential	tr|Q4E5L5|Q4E5L5_TRYCC;tr|Q4E2L7|Q4E2L7_TRYCC	tr|Q4E5L5|Q4E5L5_TRYCC;tr|Q4E2L7|Q4E2L7_TRYCC	2;2	2;2	2;2	>tr|Q4E5L5|Q4E5L5_TRYCC Uncharacterized protein OS=Trypanosoma cruzi (strain CL Brener) GN=Tc00.1047053506529.669 PE=4 SV=1;>tr|Q4E2L7|Q4E2L7_TRYCC Uncharacterized protein OS=Trypanosoma cruzi (strain CL Brener) GN=Tc00.1047053510889.340 PE=4 SV=1	2	2	2	2	6	1	1	2	2	1	1	2	2	1	1	2	2	17.9	17.9	17.9	17857	162	162;162	1	15	0	36537	9.3	9.3	0	9.3	17.9	17.9	310590000	51464000	61553000	54865000	142710000	44370000	7351900	8793300	0.00613507	0.00561223
Exponential	tr|Q4DQD9|Q4DQD9_TRYCC;tr|Q4D0R6|Q4D0R6_TRYCC	tr|Q4DQD9|Q4DQD9_TRYCC;tr|Q4D0R6|Q4D0R6_TRYCC	2;2	2;2	2;2	>tr|Q4DQD9|Q4DQD9_TRYCC Uncharacterized protein OS=Trypanosoma cruzi (strain CL Brener) GN=Tc00.1047053506629.50 PE=4 SV=1;>tr|Q4D0R6|Q4D0R6_TRYCC Uncharacterized protein OS=Trypanosoma cruzi (strain CL Brener) GN=Tc00.1047053509831.30 PE=4 SV=1	2	2	2	2	6	1	1	2	2	1	1	2	2	1	1	2	2	10.1	10.1	10.1	19.56	179	179;179	1	14	0.0031283	1877	4.5	5.6	4.5	10.1	10.1	10.1	549100000	37662000	77839000	138340000	185850000	68637000	4707800	9729900	0.0039286	0.00621
Exponential	tr|Q4DHC1|Q4DHC1_TRYCC;tr|Q4DMD3|Q4DMD3_TRYCC	tr|Q4DHC1|Q4DHC1_TRYCC;tr|Q4DMD3|Q4DMD3_TRYCC	2;2	2;2	2;2	>tr|Q4DHC1|Q4DHC1_TRYCC Haloacid dehalogenase hydrolase, putative OS=Trypanosoma cruzi (strain CL Brener) GN=Tc00.1047053511153.50 PE=4 SV=1;>tr|Q4DMD3|Q4DMD3_TRYCC Haloacid dehalogenase hydrolase, putative OS=Trypanosoma cruzi (strain CL Brener) GN=Tc00.1	2	2	2	2	6	1	1	2	2	1	1	2	2	1	1	2	2	6.8	6.8	6.8	36542	325	325;326	1	16	0	38454	3.4	3.4	3.4	3.4	6.8	6.8	442750000	62458000	112720000	57633000	156940000	20125000	2839000	5123400	0.00236911	0.00326995
Exponential	tr|Q4D3C6|Q4D3C6_TRYCC;tr|Q4D5D5|Q4D5D5_TRYCC	tr|Q4D3C6|Q4D3C6_TRYCC;tr|Q4D5D5|Q4D5D5_TRYCC	2;2	2;2	2;2	>tr|Q4D3C6|Q4D3C6_TRYCC Short chain dehydrogenase, putative OS=Trypanosoma cruzi (strain CL Brener) GN=Tc00.1047053508297.50 PE=3 SV=1;>tr|Q4D5D5|Q4D5D5_TRYCC Short chain dehydrogenase, putative OS=Trypanosoma cruzi (strain CL Brener) GN=Tc00.1047053508805	2	2	2	2	6	1	1	2	2	1	1	2	2	1	1	2	2	11.6	11.6	11.6	27641	250	250;298	1	17	0	12686	3.6	3.6	3.6	3.6	11.6	11.6	597160000	45680000	43096000	183350000	209490000	49763000	3806600	3591300	0.00317656	0.00229211
Exponential	tr|Q4E0C4|Q4E0C4_TRYCC;tr|Q4CRX2|Q4CRX2_TRYCC	tr|Q4E0C4|Q4E0C4_TRYCC;tr|Q4CRX2|Q4CRX2_TRYCC	2;2	2;2	2;2	>tr|Q4E0C4|Q4E0C4_TRYCC Clathrin coat assembly protein, putative OS=Trypanosoma cruzi (strain CL Brener) GN=Tc00.1047053509875.190 PE=4 SV=1;>tr|Q4CRX2|Q4CRX2_TRYCC Clathrin coat assembly protein, putative OS=Trypanosoma cruzi (strain CL Brener) GN=Tc00.10	2	2	2	2	6	1	1	2	2	1	1	2	2	1	1	2	2	7.4	7.4	7.4	55.49	500	500;500	1	15	0	41311	2.4	2.4	2.4	2.4	7.4	7.4	478330000	78552000	87032000	68225000	117230000	15430000	2533900	2807500	0.00211451	0.00179186
Exponential	tr|Q4DY78|Q4DY78_TRYCC;tr|Q4DA04|Q4DA04_TRYCC	tr|Q4DY78|Q4DY78_TRYCC;tr|Q4DA04|Q4DA04_TRYCC	2;2	2;2	2;2	>tr|Q4DY78|Q4DY78_TRYCC Uncharacterized protein OS=Trypanosoma cruzi (strain CL Brener) GN=Tc00.1047053511907.89 PE=1 SV=1;>tr|Q4DA04|Q4DA04_TRYCC Uncharacterized protein OS=Trypanosoma cruzi (strain CL Brener) GN=Tc00.1047053506797.110 PE=4 SV=1	2	2	2	2	6	1	1	2	2	1	1	2	2	1	1	2	2	46.2	46.2	46.2	11969	106	106;146	1	17	0	14147	23.6	22.6	22.6	22.6	46.2	46.2	784170000	7720200	30908000	282440000	445340000	112020000	1102900	4415400	0.000920356	0.00281808
Exponential	tr|Q4DXV8|Q4DXV8_TRYCC;tr|Q4DKY7|Q4DKY7_TRYCC	tr|Q4DXV8|Q4DXV8_TRYCC;tr|Q4DKY7|Q4DKY7_TRYCC	2;2	2;2	2;2	>tr|Q4DXV8|Q4DXV8_TRYCC Vacuolar protein sorting-associated protein-like, putative OS=Trypanosoma cruzi (strain CL Brener) GN=Tc00.1047053510719.10 PE=4 SV=1;>tr|Q4DKY7|Q4DKY7_TRYCC Vacuolar protein sorting-associated protein-like, putative OS=Trypanosoma	2	2	2	2	6	1	1	2	2	1	1	2	2	1	1	2	2	10.5	10.5	10.5	39.68	342	342;342	1	15	0	62019	5	5	5	5	10.5	10.5	336650000	43787000	57509000	53401000	139170000	14637000	1903800	2500400	0.0015887	0.00159585
Exponential	tr|Q4D7N5|Q4D7N5_TRYCC;tr|Q4CLW6|Q4CLW6_TRYCC	tr|Q4D7N5|Q4D7N5_TRYCC;tr|Q4CLW6|Q4CLW6_TRYCC	2;2	2;2	2;2	>tr|Q4D7N5|Q4D7N5_TRYCC Zinc finger protein 2, putative OS=Trypanosoma cruzi (strain CL Brener) GN=Tc00.1047053503989.10 PE=4 SV=1;>tr|Q4CLW6|Q4CLW6_TRYCC Zinc finger protein 2, putative OS=Trypanosoma cruzi (strain CL Brener) GN=Tc00.1047053401469.10 PE=4	2	2	2	2	6	1	1	2	2	1	1	2	2	1	1	2	2	20	20	20	20103	180	180;180	1	16	0	42827	7.2	7.2	0	0	20	20	904150000	19454000	10750000	232140000	641810000	113020000	2431800	1343800	0.00202931	0.000857665
Exponential	tr|Q4DHG8|Q4DHG8_TRYCC;tr|Q4E0W5|Q4E0W5_TRYCC	tr|Q4DHG8|Q4DHG8_TRYCC;tr|Q4E0W5|Q4E0W5_TRYCC	2;2	2;2	2;2	>tr|Q4DHG8|Q4DHG8_TRYCC Actin-like protein, putative (Fragment) OS=Trypanosoma cruzi (strain CL Brener) GN=Tc00.1047053506445.10 PE=3 SV=1;>tr|Q4E0W5|Q4E0W5_TRYCC ALP5 OS=Trypanosoma cruzi (strain CL Brener) GN=ALP5 PE=3 SV=1	2	2	2	2	6	1	1	2	2	1	1	2	2	1	1	2	2	14	14	14	34838	314	314;422	1	10	0	26934	9.6	9.6	9.6	9.6	14	14	287520000	24359000	31985000	97393000	99592000	17970000	1522400	1999000	0.00127042	0.00127584
Exponential	tr|Q4E413|Q4E413_TRYCC;tr|Q4DRP0|Q4DRP0_TRYCC	tr|Q4E413|Q4E413_TRYCC;tr|Q4DRP0|Q4DRP0_TRYCC	2;2	2;2	2;2	>tr|Q4E413|Q4E413_TRYCC Uncharacterized protein OS=Trypanosoma cruzi (strain CL Brener) GN=Tc00.1047053511127.70 PE=4 SV=1;>tr|Q4DRP0|Q4DRP0_TRYCC Uncharacterized protein OS=Trypanosoma cruzi (strain CL Brener) GN=Tc00.1047053509023.60 PE=4 SV=1	2	2	2	2	6	1	1	2	2	1	1	2	2	1	1	2	2	4.5	4.5	4.5	59806	535	535;535	1	13	0	38466	2.6	2.6	2.6	2.6	4.5	4.5	274820000	26795000	64365000	41746000	83191000	7427700	724180	1739600	0.000604319	0.00111028
Exponential	tr|Q4DXS9|Q4DXS9_TRYCC;tr|Q4D726|Q4D726_TRYCC	tr|Q4DXS9|Q4DXS9_TRYCC;tr|Q4D726|Q4D726_TRYCC	2;2	2;2	2;2	>tr|Q4DXS9|Q4DXS9_TRYCC Golgi SNARE protein-like, putative OS=Trypanosoma cruzi (strain CL Brener) GN=Tc00.1047053510719.290 PE=4 SV=1;>tr|Q4D726|Q4D726_TRYCC Golgi SNARE protein-like, putative OS=Trypanosoma cruzi (strain CL Brener) GN=Tc00.1047053506275.	2	2	2	2	6	1	1	2	2	1	1	2	2	1	1	2	2	12.2	12.2	12.2	27331	238	238;238	1	8	0	74959	5	5	0	0	12.2	12.2	214540000	7404500	10739000	76440000	119960000	13409000	462780	671180	0.000386184	0.000428373
Exponential	tr|Q4DIQ5|Q4DIQ5_TRYCC;tr|Q4DFZ1|Q4DFZ1_TRYCC	tr|Q4DIQ5|Q4DIQ5_TRYCC;tr|Q4DFZ1|Q4DFZ1_TRYCC	2;2	2;2	2;2	>tr|Q4DIQ5|Q4DIQ5_TRYCC Uncharacterized protein OS=Trypanosoma cruzi (strain CL Brener) GN=Tc00.1047053506635.70 PE=4 SV=1;>tr|Q4DFZ1|Q4DFZ1_TRYCC Uncharacterized protein OS=Trypanosoma cruzi (strain CL Brener) GN=Tc00.1047053508027.120 PE=4 SV=1	2	2	2	2	6	1	1	2	2	1	1	2	2	1	1	2	2	2	2	2	79892	705	705;705	1	16	0	4955	1.8	1.8	1.8	1.8	2	2	133380000	0	17113000	44093000	50235000	3031300	0	388940		0.000248237
Exponential	tr|Q4DX02|Q4DX02_TRYCC;tr|Q4DQT6|Q4DQT6_TRYCC	tr|Q4DX02|Q4DX02_TRYCC;tr|Q4DQT6|Q4DQT6_TRYCC	2;2	2;2	2;2	>tr|Q4DX02|Q4DX02_TRYCC Translation initiation factor IF-2, putative OS=Trypanosoma cruzi (strain CL Brener) GN=Tc00.1047053510533.120 PE=4 SV=1;>tr|Q4DQT6|Q4DQT6_TRYCC Translation initiation factor IF-2, putative OS=Trypanosoma cruzi (strain CL Brener) GN	2	2	2	2	6	1	1	2	2	1	1	2	2	1	1	2	2	3.5	3.5	3.5	85854	778	778;778	1	9	0	99061	1.5	1.9	0	0	3.5	3.5	103070000	0	19652000	53986000	29429000	1944700	0	370780		0.000236646
Exponential	tr|Q4CYA3|Q4CYA3_TRYCC;sp|Q4DHA1|SEY1_TRYCC	tr|Q4CYA3|Q4CYA3_TRYCC;sp|Q4DHA1|SEY1_TRYCC	2;2	2;2	2;2	>tr|Q4CYA3|Q4CYA3_TRYCC Uncharacterized protein (Fragment) OS=Trypanosoma cruzi (strain CL Brener) GN=Tc00.1047053509649.59 PE=3 SV=1;>sp|Q4DHA1|SEY1_TRYCC Protein SEY1 homolog OS=Trypanosoma cruzi (strain CL Brener) GN=Tc00.1047053511285.50 PE=3 SV=1	2	2	2	2	5	1	0	2	2	1	0	2	2	1	0	2	2	5.6	5.6	5.6	46901	410	410;877	1	12	0.0021482	20835	2.7	0	2.7	5.6	5.6	5.6	203860000	23487000	0	21104000	83835000	8154400	939470	0	0.000783976
Exponential	tr|Q4DA89|Q4DA89_TRYCC;tr|Q4D0K5|Q4D0K5_TRYCC	tr|Q4DA89|Q4DA89_TRYCC;tr|Q4D0K5|Q4D0K5_TRYCC	2;2	2;2	2;2	>tr|Q4DA89|Q4DA89_TRYCC Transcription elongation factor 1 homolog OS=Trypanosoma cruzi (strain CL Brener) GN=Tc00.1047053509991.110 PE=3 SV=1;>tr|Q4D0K5|Q4D0K5_TRYCC Transcription elongation factor 1 homolog OS=Trypanosoma cruzi (strain CL Brener) GN=Tc00.	2	2	2	2	4	0	0	2	2	0	0	2	2	0	0	2	2	14.6	14.6	14.6	18.91	171	171;171	1	4	0.0097454	12887	0	0	0	0	14.6	14.6	117700000	0	0	44859000	72839000	11770000	0	0
Exponential	tr|Q4CMK2|Q4CMK2_TRYCC;tr|Q4D8X3|Q4D8X3_TRYCC	tr|Q4CMK2|Q4CMK2_TRYCC;tr|Q4D8X3|Q4D8X3_TRYCC	2;2	2;2	2;2	>tr|Q4CMK2|Q4CMK2_TRYCC ATP-dependent DEAD/H RNA helicase, putative (Fragment) OS=Trypanosoma cruzi (strain CL Brener) GN=Tc00.1047053511199.9 PE=4 SV=1;>tr|Q4D8X3|Q4D8X3_TRYCC ATP-dependent DEAD/H RNA helicase, putative OS=Trypanosoma cruzi (strain CL Bre	2	2	2	2	4	0	0	2	2	0	0	2	2	0	0	2	2	23.3	23.3	23.3	19534	176	176;395	1	6	0	31703	0	0	0	0	23.3	23.3	127390000	0	0	60640000	66745000	9798800	0	0
Exponential	tr|Q4DE25|Q4DE25_TRYCC;tr|Q4CZ23|Q4CZ23_TRYCC	tr|Q4DE25|Q4DE25_TRYCC;tr|Q4CZ23|Q4CZ23_TRYCC	2;2	2;2	2;2	>tr|Q4DE25|Q4DE25_TRYCC Sedoheptulose-1,6-bisphosphatase, putative OS=Trypanosoma cruzi (strain CL Brener) GN=Tc00.1047053506619.10 PE=4 SV=1;>tr|Q4CZ23|Q4CZ23_TRYCC Sedoheptulose-1,7-bisphosphatase, putative OS=Trypanosoma cruzi (strain CL Brener) GN=Tc00	2	2	2	2	4	0	0	2	2	0	0	2	2	0	0	2	2	10.9	10.9	10.9	34903	320	320;320	1	7	0	38734	0	0	0	0	10.9	10.9	79220000	0	0	37409000	41810000	3772400	0	0
Exponential	tr|Q4DQV2|Q4DQV2_TRYCC;tr|Q4DLJ1|Q4DLJ1_TRYCC	tr|Q4DQV2|Q4DQV2_TRYCC;tr|Q4DLJ1|Q4DLJ1_TRYCC	2;2	2;2	2;2	>tr|Q4DQV2|Q4DQV2_TRYCC RNA helicase, putative OS=Trypanosoma cruzi (strain CL Brener) GN=Tc00.1047053511911.110 PE=4 SV=1;>tr|Q4DLJ1|Q4DLJ1_TRYCC RNA helicase, putative OS=Trypanosoma cruzi (strain CL Brener) GN=Tc00.1047053508637.70 PE=4 SV=1	2	2	2	2	3	0	0	2	1	0	0	2	1	0	0	2	1	4.8	4.8	4.8	69231	620	620;620	1	6	0	4747	0	0	0	0	4.8	2.6	121330000	0	0	55948000	65379000	3370200	0	0
Exponential	tr|Q4DI71|Q4DI71_TRYCC;tr|Q4CY11|Q4CY11_TRYCC;tr|Q4D669|Q4D669_TRYCC;tr|Q4DI70|Q4DI70_TRYCC	tr|Q4DI71|Q4DI71_TRYCC;tr|Q4CY11|Q4CY11_TRYCC;tr|Q4D669|Q4D669_TRYCC;tr|Q4DI70|Q4DI70_TRYCC	2;1;1;1	2;1;1;1	2;1;1;1	>tr|Q4DI71|Q4DI71_TRYCC Uncharacterized protein OS=Trypanosoma cruzi (strain CL Brener) GN=Tc00.1047053507831.20 PE=4 SV=1;>tr|Q4CY11|Q4CY11_TRYCC Uncharacterized protein OS=Trypanosoma cruzi (strain CL Brener) GN=Tc00.1047053511267.20 PE=4 SV=1;>tr|Q4D669	4	2	2	2	6	1	1	2	2	1	1	2	2	1	1	2	2	9.6	9.6	9.6	40422	364	364;251;390;488	1	15	0	17.86	4.1	4.1	0	5.5	9.6	9.6	304350000	20178000	5779700	88762000	175740000	19022000	1261100	361230	0.00105237	0.000230551
Exponential	tr|Q4DBR0|Q4DBR0_TRYCC;tr|Q4CL83|Q4CL83_TRYCC;tr|Q4CML9|Q4CML9_TRYCC	tr|Q4DBR0|Q4DBR0_TRYCC;tr|Q4CL83|Q4CL83_TRYCC;tr|Q4CML9|Q4CML9_TRYCC	2;1;1	2;1;1	2;1;1	>tr|Q4DBR0|Q4DBR0_TRYCC Pumilio/PUF RNA binding protein 1, putative OS=Trypanosoma cruzi (strain CL Brener) GN=Tc00.1047053508625.160 PE=4 SV=1;>tr|Q4CL83|Q4CL83_TRYCC Pumilio/PUF RNA binding protein 1, putative (Fragment) OS=Trypanosoma cruzi (strain CL B	3	2	2	2	6	1	1	2	2	1	1	2	2	1	1	2	2	5.8	5.8	5.8	54163	483	483;212;391	1	14	0	27395	3.1	3.1	3.1	3.1	5.8	5.8	386510000	76382000	95126000	31894000	98798000	13804000	2727900	3397300	0.0022764	0.00216829
Exponential	tr|Q4CR19|Q4CR19_TRYCC;tr|Q4CKD3|Q4CKD3_TRYCC;tr|Q4CK90|Q4CK90_TRYCC	tr|Q4CR19|Q4CR19_TRYCC;tr|Q4CKD3|Q4CKD3_TRYCC;tr|Q4CK90|Q4CK90_TRYCC	2;1;1	2;1;1	2;1;1	>tr|Q4CR19|Q4CR19_TRYCC Farnesyl synthetase, putative OS=Trypanosoma cruzi (strain CL Brener) GN=Tc00.1047053509445.30 PE=3 SV=1;>tr|Q4CKD3|Q4CKD3_TRYCC Uncharacterized protein (Fragment) OS=Trypanosoma cruzi (strain CL Brener) GN=Tc00.1047053422031.10 PE=	3	2	2	2	6	1	1	2	2	1	1	2	2	1	1	2	2	11.3	11.3	11.3	39373	363	363;173;292	1	10	0	40442	4.4	4.4	0	0	11.3	11.3	372200000	34254000	28849000	36138000	272960000	20678000	1903000	1602700	0.00158803	0.00102291
Exponential	tr|Q4D5L3|Q4D5L3_TRYCC;tr|Q4CKB3|Q4CKB3_TRYCC;tr|Q4D0P0|Q4D0P0_TRYCC	tr|Q4D5L3|Q4D5L3_TRYCC;tr|Q4CKB3|Q4CKB3_TRYCC;tr|Q4D0P0|Q4D0P0_TRYCC	2;1;1	2;1;1	2;1;1	>tr|Q4D5L3|Q4D5L3_TRYCC Trafficking protein particle complex subunit OS=Trypanosoma cruzi (strain CL Brener) GN=Tc00.1047053508839.30 PE=3 SV=1;>tr|Q4CKB3|Q4CKB3_TRYCC Trafficking protein particle complex subunit 3, putative (Fragment) OS=Trypanosoma cruzi	3	2	2	2	6	1	1	2	2	1	1	2	2	1	1	2	2	15.5	15.5	15.5	21.18	193	193;59;193	1	8	0	45486	9.3	6.2	0	6.2	15.5	15.5	125580000	14669000	9354600	23234000	75976000	11416000	1333500	850410	0.00111279	0.000542765
Exponential	tr|Q4E1R4|Q4E1R4_TRYCC;tr|Q4DA61|Q4DA61_TRYCC	tr|Q4E1R4|Q4E1R4_TRYCC;tr|Q4DA61|Q4DA61_TRYCC	2;1	2;1	2;1	>tr|Q4E1R4|Q4E1R4_TRYCC Uncharacterized protein OS=Trypanosoma cruzi (strain CL Brener) GN=Tc00.1047053506855.320 PE=4 SV=1;>tr|Q4DA61|Q4DA61_TRYCC Uncharacterized protein OS=Trypanosoma cruzi (strain CL Brener) GN=Tc00.1047053511131.70 PE=4 SV=1	2	2	2	2	7	1	2	2	2	1	2	2	2	1	2	2	2	16	16	16	25918	238	238;240	1	17	0	88259	6.7	16	16	16	16	16	318270000	26097000	34819000	83485000	126920000	26522000	2174700	2901600	0.00181476	0.00185191
Exponential	tr|Q4DS16|Q4DS16_TRYCC;tr|Q4DGH6|Q4DGH6_TRYCC	tr|Q4DS16|Q4DS16_TRYCC;tr|Q4DGH6|Q4DGH6_TRYCC	2;1	2;1	2;1	>tr|Q4DS16|Q4DS16_TRYCC Uncharacterized protein OS=Trypanosoma cruzi (strain CL Brener) GN=Tc00.1047053507949.20 PE=4 SV=1;>tr|Q4DGH6|Q4DGH6_TRYCC Uncharacterized protein OS=Trypanosoma cruzi (strain CL Brener) GN=Tc00.1047053511423.160 PE=4 SV=1	2	2	2	2	6	0	2	2	2	0	2	2	2	0	2	2	2	14.6	14.6	14.6	25969	233	233;233	1	13	0	80123	0	14.6	6.4	6.4	14.6	14.6	298000000	0	52913000	53489000	127260000	29800000	0	5291300		0.00337711
Exponential	tr|Q4E4W2|Q4E4W2_TRYCC;tr|Q4DTA1|Q4DTA1_TRYCC	tr|Q4E4W2|Q4E4W2_TRYCC;tr|Q4DTA1|Q4DTA1_TRYCC	2;1	2;1	2;1	>tr|Q4E4W2|Q4E4W2_TRYCC Ubiquinone biosynthesis O-methyltransferase, mitochondrial OS=Trypanosoma cruzi (strain CL Brener) GN=Tc00.1047053508461.30 PE=3 SV=1;>tr|Q4DTA1|Q4DTA1_TRYCC Ubiquinone biosynthesis O-methyltransferase, mitochondrial OS=Trypanosoma	2	2	2	2	6	1	1	2	2	1	1	2	2	1	1	2	2	14.3	14.3	14.3	30134	272	272;272	1	13	0	22278	6.2	6.2	6.2	6.2	14.3	14.3	631320000	67249000	90627000	164960000	247220000	35073000	3736000	5034800	0.00311765	0.00321341
Exponential	tr|Q4D3W8|Q4D3W8_TRYCC;tr|Q4DT96|Q4DT96_TRYCC	tr|Q4D3W8|Q4D3W8_TRYCC;tr|Q4DT96|Q4DT96_TRYCC	2;1	2;1	2;1	>tr|Q4D3W8|Q4D3W8_TRYCC Uncharacterized protein OS=Trypanosoma cruzi (strain CL Brener) GN=Tc00.1047053510735.70 PE=4 SV=1;>tr|Q4DT96|Q4DT96_TRYCC Uncharacterized protein OS=Trypanosoma cruzi (strain CL Brener) GN=Tc00.1047053506147.120 PE=4 SV=1	2	2	2	2	6	1	1	2	2	1	1	2	2	1	1	2	2	8.9	8.9	8.9	28441	247	247;251	1	15	0	61932	4	4	4	4	8.9	8.9	325780000	38346000	66722000	35990000	127490000	23270000	2739000	4765900	0.00228566	0.00304178
Exponential	tr|Q4DLS0|Q4DLS0_TRYCC;tr|Q4DYZ1|Q4DYZ1_TRYCC	tr|Q4DLS0|Q4DLS0_TRYCC;tr|Q4DYZ1|Q4DYZ1_TRYCC	2;1	2;1	2;1	>tr|Q4DLS0|Q4DLS0_TRYCC Uncharacterized protein OS=Trypanosoma cruzi (strain CL Brener) GN=Tc00.1047053509153.100 PE=3 SV=1;>tr|Q4DYZ1|Q4DYZ1_TRYCC Uncharacterized protein OS=Trypanosoma cruzi (strain CL Brener) GN=Tc00.1047053510303.310 PE=3 SV=1	2	2	2	2	6	1	1	2	2	1	1	2	2	1	1	2	2	9.5	9.5	9.5	46279	419	419;419	1	14	0	60201	4.5	4.5	4.5	0	9.5	9.5	580440000	64667000	26133000	120460000	331300000	26384000	2939400	1187900	0.00245289	0.000758164
Exponential	tr|Q4CXB2|Q4CXB2_TRYCC;tr|Q4CZK6|Q4CZK6_TRYCC	tr|Q4CXB2|Q4CXB2_TRYCC;tr|Q4CZK6|Q4CZK6_TRYCC	2;1	2;1	2;1	>tr|Q4CXB2|Q4CXB2_TRYCC Uncharacterized protein OS=Trypanosoma cruzi (strain CL Brener) GN=Tc00.1047053503527.10 PE=4 SV=1;>tr|Q4CZK6|Q4CZK6_TRYCC Uncharacterized protein OS=Trypanosoma cruzi (strain CL Brener) GN=Tc00.1047053510299.20 PE=4 SV=1	2	2	2	2	6	1	1	2	2	1	1	2	2	1	1	2	2	8.6	8.6	8.6	58.41	514	514;514	1	11	0.003739	17352	3.1	3.1	0	3.1	8.6	8.6	323620000	33087000	54473000	68453000	163710000	15410000	1575600	2593900	0.00131482	0.00165553
Exponential	tr|Q4DKB2|Q4DKB2_TRYCC;tr|Q4E0Z6|Q4E0Z6_TRYCC	tr|Q4DKB2|Q4DKB2_TRYCC;tr|Q4E0Z6|Q4E0Z6_TRYCC	2;1	2;1	2;1	>tr|Q4DKB2|Q4DKB2_TRYCC Condensin subunit 1, putative OS=Trypanosoma cruzi (strain CL Brener) GN=Tc00.1047053509941.110 PE=4 SV=1;>tr|Q4E0Z6|Q4E0Z6_TRYCC Condensin subunit 1, putative (Fragment) OS=Trypanosoma cruzi (strain CL Brener) GN=Tc00.1047053508277	2	2	2	2	6	1	1	2	2	1	1	2	2	1	1	2	2	1.8	1.8	1.8	141.93	1247	1247;949	1	12	0	32558	1	1	1	1	1.8	1.8	177780000	27637000	25837000	32995000	79417000	2222200	345460	322970	0.000288282	0.000206132
Exponential	tr|Q4CN30|Q4CN30_TRYCC;tr|Q4CL28|Q4CL28_TRYCC	tr|Q4CN30|Q4CN30_TRYCC;tr|Q4CL28|Q4CL28_TRYCC	2;1	2;1	2;1	>tr|Q4CN30|Q4CN30_TRYCC FtsJ cell division protein, putative (Fragment) OS=Trypanosoma cruzi (strain CL Brener) GN=Tc00.1047053507207.19 PE=3 SV=1;>tr|Q4CL28|Q4CL28_TRYCC FtsJ cell division protein, putative (Fragment) OS=Trypanosoma cruzi (strain CL Brene	2	2	2	2	6	1	1	2	2	1	1	2	2	1	1	2	2	3.8	3.8	3.8	72.71	651	651;211	1	10	0	2975	1.8	1.8	0	0	3.8	3.8	298590000	7804200	10493000	92493000	187800000	8531000	222980	299810	0.000186074	0.00019135
Exponential	tr|Q4DS38|Q4DS38_TRYCC;tr|Q4DGB2|Q4DGB2_TRYCC	tr|Q4DS38|Q4DS38_TRYCC;tr|Q4DGB2|Q4DGB2_TRYCC	2;1	2;1	2;1	>tr|Q4DS38|Q4DS38_TRYCC Uncharacterized protein OS=Trypanosoma cruzi (strain CL Brener) GN=Tc00.1047053506475.120 PE=4 SV=1;>tr|Q4DGB2|Q4DGB2_TRYCC Uncharacterized protein OS=Trypanosoma cruzi (strain CL Brener) GN=Tc00.1047053511431.30 PE=4 SV=1	2	2	2	2	5	1	0	2	2	1	0	2	2	1	0	2	2	8.9	8.9	8.9	54805	504	504;504	1	16	0	52495	4	0	4	4	8.9	8.9	184290000	0	0	81180000	90721000	8376800	0	0
Exponential	tr|Q4E1Q3|Q4E1Q3_TRYCC;tr|Q4D078|Q4D078_TRYCC	tr|Q4E1Q3|Q4E1Q3_TRYCC;tr|Q4D078|Q4D078_TRYCC	2;1	2;1	2;1	>tr|Q4E1Q3|Q4E1Q3_TRYCC Uncharacterized protein OS=Trypanosoma cruzi (strain CL Brener) GN=Tc00.1047053507093.63 PE=4 SV=1;>tr|Q4D078|Q4D078_TRYCC Uncharacterized protein OS=Trypanosoma cruzi (strain CL Brener) GN=Tc00.1047053503917.7 PE=4 SV=1	2	2	2	2	4	0	0	2	2	0	0	2	2	0	0	2	2	6.7	6.7	6.7	50331	460	460;460	1	8	0	89077	0	0	0	0	6.7	6.7	194480000	0	0	71362000	123120000	7480100	0	0
Exponential	tr|Q4E4C6|Q4E4C6_TRYCC	tr|Q4E4C6|Q4E4C6_TRYCC	2	2	2	>tr|Q4E4C6|Q4E4C6_TRYCC Uncharacterized protein OS=Trypanosoma cruzi (strain CL Brener) GN=Tc00.1047053510187.250 PE=4 SV=1	1	2	2	2	7	2	2	2	1	2	2	2	1	2	2	2	1	22.6	22.6	22.6	13942	124	124	1	19	0	62441	22.6	22.6	14.5	22.6	22.6	8.1	215450000	7393600	43775000	68238000	96048000	30779000	1056200	6253500	0.000881386	0.00399123
Exponential	tr|Q4DQY2|Q4DQY2_TRYCC	tr|Q4DQY2|Q4DQY2_TRYCC	2	2	2	>tr|Q4DQY2|Q4DQY2_TRYCC Uncharacterized protein OS=Trypanosoma cruzi (strain CL Brener) GN=Tc00.1047053509331.74 PE=4 SV=1	1	2	2	2	6	1	1	2	2	1	1	2	2	1	1	2	2	27.8	27.8	27.8	10554	90	90	1	20	0	23461	12.2	12.2	12.2	12.2	27.8	27.8	1988600000	212190000	269440000	444430000	660470000	284090000	30313000	38492000	0.0252958	0.0245671
Exponential	tr|Q4CW73|Q4CW73_TRYCC	tr|Q4CW73|Q4CW73_TRYCC	2	2	2	>tr|Q4CW73|Q4CW73_TRYCC Uncharacterized protein OS=Trypanosoma cruzi (strain CL Brener) GN=Tc00.1047053507077.50 PE=4 SV=1	1	2	2	2	6	1	1	2	2	1	1	2	2	1	1	2	2	22.1	22.1	22.1	13031	113	113	1	17	0	20.21	9.7	9.7	22.1	22.1	22.1	22.1	1148500000	174250000	224260000	200900000	288430000	143560000	21782000	28033000	0.0181768	0.0178918
Exponential	tr|Q4DV52|Q4DV52_TRYCC	tr|Q4DV52|Q4DV52_TRYCC	2	2	2	>tr|Q4DV52|Q4DV52_TRYCC Uncharacterized protein OS=Trypanosoma cruzi (strain CL Brener) GN=Tc00.1047053508647.110 PE=4 SV=1	1	2	2	2	6	1	1	2	2	1	1	2	2	1	1	2	2	19	19	19	14003	121	121	1	12	0	35144	5.8	5.8	0	5.8	19	19	532130000	95101000	127840000	128470000	152170000	59125000	10567000	14205000	0.00881803	0.00906618
Exponential	tr|Q4CYA0|Q4CYA0_TRYCC	tr|Q4CYA0|Q4CYA0_TRYCC	2	2	1	>tr|Q4CYA0|Q4CYA0_TRYCC Proteasome regulatory non-ATPase subunit 11, putative OS=Trypanosoma cruzi (strain CL Brener) GN=Tc00.1047053509627.30 PE=4 SV=1	1	2	2	1	6	1	1	2	2	1	1	2	2	1	1	1	1	12.7	12.7	4.4	40775	363	363	1	15	0	42261	4.4	4.4	4.4	4.4	12.7	12.7	1100600000	145190000	210990000	188630000	326170000	50026000	6599400	9590500	0.00550712	0.00612103
Exponential	tr|Q4CSE9|Q4CSE9_TRYCC	tr|Q4CSE9|Q4CSE9_TRYCC	2	2	1	>tr|Q4CSE9|Q4CSE9_TRYCC Uncharacterized protein OS=Trypanosoma cruzi (strain CL Brener) GN=Tc00.1047053504129.40 PE=4 SV=1	1	2	2	1	6	1	1	2	2	1	1	2	2	0	0	1	1	9.9	9.9	6	30578	282	282	1	12	0	48907	3.9	3.9	0	6	9.9	9.9	390240000	97638000	106290000	65556000	113120000	22955000	5743400	6252500	0.0047928	0.00399059
Exponential	tr|Q4DK45|Q4DK45_TRYCC	tr|Q4DK45|Q4DK45_TRYCC	2	2	2	>tr|Q4DK45|Q4DK45_TRYCC Eukaryotic translation initiation factor, putative OS=Trypanosoma cruzi (strain CL Brener) GN=Tc00.1047053508827.30 PE=3 SV=1	1	2	2	2	6	1	1	2	2	1	1	2	2	1	1	2	2	6.6	6.6	6.6	49714	457	457	1	14	0	89153	3.3	3.3	3.3	3.3	6.6	6.6	677020000	86912000	104860000	137010000	229120000	32239000	4138600	4993100	0.00345361	0.00318679
Exponential	tr|Q4D3C4|Q4D3C4_TRYCC	tr|Q4D3C4|Q4D3C4_TRYCC	2	2	2	>tr|Q4D3C4|Q4D3C4_TRYCC Nonspecific lipid-transfer protein, putative (Fragment) OS=Trypanosoma cruzi (strain CL Brener) GN=Tc00.1047053511393.10 PE=4 SV=1	1	2	2	2	6	1	1	2	2	1	1	2	2	1	1	2	2	8.7	8.7	8.7	29041	264	264	1	13	0	27496	4.2	4.2	4.2	4.2	8.7	8.7	359590000	38928000	79939000	76297000	92221000	27661000	2994500	6149200	0.00249887	0.00392466
Exponential	tr|Q4DT99|Q4DT99_TRYCC	tr|Q4DT99|Q4DT99_TRYCC	2	2	2	>tr|Q4DT99|Q4DT99_TRYCC Uncharacterized protein OS=Trypanosoma cruzi (strain CL Brener) GN=Tc00.1047053506147.80 PE=4 SV=1	1	2	2	2	6	1	1	2	2	1	1	2	2	1	1	2	2	19	19	19	19012	168	168	1	16	0	13368	6.5	6.5	6.5	6.5	19	19	280630000	16682000	53339000	82478000	79463000	28063000	1668200	5333900	0.00139209	0.0034043
Exponential	tr|Q4CYR4|Q4CYR4_TRYCC	tr|Q4CYR4|Q4CYR4_TRYCC	2	2	1	>tr|Q4CYR4|Q4CYR4_TRYCC Glycosylphosphatidylinositol (GPI) anchor, putative (Fragment) OS=Trypanosoma cruzi (strain CL Brener) GN=Tc00.1047053503923.50 PE=4 SV=1	1	2	2	1	6	1	1	2	2	1	1	2	2	1	1	1	1	5.8	5.8	2.3	53979	483	483	1	17	0	23149	2.3	2.3	2.3	2.3	5.8	5.8	356530000	66607000	92196000	38485000	76662000	14261000	2664300	3687800	0.00222333	0.0023537
Exponential	tr|Q4DTW2|Q4DTW2_TRYCC	tr|Q4DTW2|Q4DTW2_TRYCC	2	2	2	>tr|Q4DTW2|Q4DTW2_TRYCC Cleavage and polyadenylation specificity factor, putative (Fragment) OS=Trypanosoma cruzi (strain CL Brener) GN=Tc00.1047053508693.10 PE=4 SV=1	1	2	2	2	6	1	1	2	2	1	1	2	2	1	1	2	2	3.8	3.8	3.8	69992	625	625	1	13	0	52174	1.6	1.6	1.6	1.6	3.8	3.8	345590000	50958000	72728000	78307000	94933000	12343000	1819900	2597400	0.00151868	0.00165776
Exponential	tr|Q4D4A1|Q4D4A1_TRYCC	tr|Q4D4A1|Q4D4A1_TRYCC	2	2	2	>tr|Q4D4A1|Q4D4A1_TRYCC Malate dehydrogenase OS=Trypanosoma cruzi (strain CL Brener) GN=Tc00.1047053507883.100 PE=3 SV=1	1	2	2	2	6	1	1	2	2	1	1	2	2	1	1	2	2	10.2	10.2	10.2	40348	374	374	1	13	0	54643	4.3	4.3	4.3	4.3	10.2	10.2	279630000	30275000	41292000	61231000	102150000	15535000	1681900	2294000	0.00140352	0.00146412
Exponential	tr|Q4DYZ9|Q4DYZ9_TRYCC	tr|Q4DYZ9|Q4DYZ9_TRYCC	2	2	2	>tr|Q4DYZ9|Q4DYZ9_TRYCC Uncharacterized protein OS=Trypanosoma cruzi (strain CL Brener) GN=Tc00.1047053510303.220 PE=4 SV=1	1	2	2	2	6	1	1	2	2	1	1	2	2	1	1	2	2	5.3	5.3	5.3	42174	374	374	1	8	0.0021763	21411	2.4	2.4	0	0	5.3	5.3	182650000	20360000	42100000	34870000	85319000	10147000	1131100	2338900	0.000943889	0.00149278
Exponential	tr|Q4E1B6|Q4E1B6_TRYCC	tr|Q4E1B6|Q4E1B6_TRYCC	2	2	2	>tr|Q4E1B6|Q4E1B6_TRYCC Carnitine O-palmitoyltransferase II, putative OS=Trypanosoma cruzi (strain CL Brener) GN=Tc00.1047053511807.284 PE=3 SV=1	1	2	2	2	6	1	1	2	2	1	1	2	2	1	1	2	2	4.3	4.3	4.3	77058	678	678	1	14	0	31683	2.2	2.2	2.2	2.2	4.3	4.3	314140000	47511000	60460000	53490000	96960000	6829200	1032800	1314400	0.000861859	0.000838901
Exponential	tr|Q4CYW7|Q4CYW7_TRYCC	tr|Q4CYW7|Q4CYW7_TRYCC	2	1	1	>tr|Q4CYW7|Q4CYW7_TRYCC Tyrosine aminotransferase OS=Trypanosoma cruzi (strain CL Brener) GN=Tc00.1047053508535.50 PE=4 SV=1	1	2	1	1	6	1	1	2	2	0	0	1	1	0	0	1	1	22.9	16.8	16.8	14778	131	131	1	8	0	28704	6.1	6.1	6.1	6.1	22.9	22.9	397220000	0	0	135290000	261920000	79443000	0	0
Exponential	tr|Q4DHS5|Q4DHS5_TRYCC	tr|Q4DHS5|Q4DHS5_TRYCC	2	1	1	>tr|Q4DHS5|Q4DHS5_TRYCC Uncharacterized protein OS=Trypanosoma cruzi (strain CL Brener) GN=Tc00.1047053507787.40 PE=4 SV=1	1	2	1	1	5	1	1	1	2	1	1	1	1	1	1	1	1	17.7	9.7	9.7	24608	226	226	1	12	0	25428	9.7	9.7	9.7	9.7	9.7	17.7	442060000	112590000	85096000	47348000	115660000	31576000	8042100	6078300	0.00671103	0.00387941
Exponential	tr|Q4DX40|Q4DX40_TRYCC	tr|Q4DX40|Q4DX40_TRYCC	2	2	2	>tr|Q4DX40|Q4DX40_TRYCC Uncharacterized protein OS=Trypanosoma cruzi (strain CL Brener) GN=Tc00.1047053508257.180 PE=4 SV=1	1	2	2	2	5	1	0	2	2	1	0	2	2	1	0	2	2	9.4	9.4	9.4	33808	299	299	1	8	0.0037466	17457	6.4	0	0	6.4	9.4	9.4	127660000	31341000	0	31589000	64728000	7509300	1843600	0	0.00153846
Exponential	tr|Q4E587|Q4E587_TRYCC	tr|Q4E587|Q4E587_TRYCC	2	2	2	>tr|Q4E587|Q4E587_TRYCC TPR-repeat protein, putative OS=Trypanosoma cruzi (strain CL Brener) GN=Tc00.1047053506559.430 PE=4 SV=1	1	2	2	2	5	0	1	2	2	0	1	2	2	0	1	2	2	6.6	6.6	6.6	79.47	700	700	1	8	0.00037722	2382	0	3	0	0	6.6	6.6	164020000	0	46901000	30317000	86800000	3814400	0	1090700		0.000696127
Exponential	tr|Q4CND5|Q4CND5_TRYCC	tr|Q4CND5|Q4CND5_TRYCC	2	2	2	>tr|Q4CND5|Q4CND5_TRYCC 26S proteasome regulatory non-ATPase subunit, putative (Fragment) OS=Trypanosoma cruzi (strain CL Brener) GN=Tc00.1047053504221.20 PE=4 SV=1	1	2	2	2	5	0	1	2	2	0	1	2	2	0	1	2	2	10	10	10	28541	271	271	1	8	0.0046053	15436	0	5.5	0	5.5	10	10	256850000	0	13222000	82683000	155440000	15109000	0	777790		0.000496416
Exponential	tr|Q4CRU4|Q4CRU4_TRYCC	tr|Q4CRU4|Q4CRU4_TRYCC	2	2	1	>tr|Q4CRU4|Q4CRU4_TRYCC Uncharacterized protein OS=Trypanosoma cruzi (strain CL Brener) GN=Tc00.1047053510953.40 PE=4 SV=1	1	2	2	1	4	0	0	2	2	0	0	2	2	0	0	1	1	20.4	20.4	11	19952	181	181	1	11	0	31353	0	0	0	0	20.4	20.4	821120000	0	0	280900000	540220000	102640000	0	0
Exponential	tr|Q4CQS3|Q4CQS3_TRYCC	tr|Q4CQS3|Q4CQS3_TRYCC	2	2	2	>tr|Q4CQS3|Q4CQS3_TRYCC Uncharacterized protein OS=Trypanosoma cruzi (strain CL Brener) GN=Tc00.1047053503713.10 PE=4 SV=1	1	2	2	2	4	0	0	2	2	0	0	2	2	0	0	2	2	17.9	17.9	17.9	22219	201	201	1	13	0	5625	0	0	0	17.9	17.9	17.9	331480000	0	0	108370000	191420000	30135000	0	0
Exponential	tr|Q4DX78|Q4DX78_TRYCC	tr|Q4DX78|Q4DX78_TRYCC	2	2	2	>tr|Q4DX78|Q4DX78_TRYCC Serine/arginine-rich protein specific kinase SRPK, putative OS=Trypanosoma cruzi (strain CL Brener) GN=Tc00.1047053506945.220 PE=4 SV=1	1	2	2	2	4	0	0	2	2	0	0	2	2	0	0	2	2	4.3	4.3	4.3	82178	716	716	1	15	0	37739	0	0	0	0	4.3	4.3	287730000	0	0	99459000	188270000	8719200	0	0
Exponential	tr|Q4CNU0|Q4CNU0_TRYCC	tr|Q4CNU0|Q4CNU0_TRYCC	2	2	2	>tr|Q4CNU0|Q4CNU0_TRYCC Phospholipase B-like OS=Trypanosoma cruzi (strain CL Brener) GN=Tc00.1047053510825.30 PE=3 SV=1	1	2	2	2	3	1	0	1	1	1	0	1	1	1	0	1	1	3.6	3.6	3.6	72756	644	644	1	10	0.001105	22264	2	0	1.6	1.6	1.6	1.6	183950000	0	0	39252000	125640000	6343100	0	0
Exponential	tr|Q4DMY6|Q4DMY6_TRYCC;tr|Q4CN28|Q4CN28_TRYCC	tr|Q4DMY6|Q4DMY6_TRYCC;tr|Q4CN28|Q4CN28_TRYCC	1;1	1;1	1;1	>tr|Q4DMY6|Q4DMY6_TRYCC Enolase, putative OS=Trypanosoma cruzi (strain CL Brener) GN=Tc00.1047053511529.90 PE=4 SV=1;>tr|Q4CN28|Q4CN28_TRYCC Enolase, putative OS=Trypanosoma cruzi (strain CL Brener) GN=Tc00.1047053511029.10 PE=4 SV=1	2	1	1	1	4	1	1	1	1	1	1	1	1	1	1	1	1	4.8	4.8	4.8	57235	520	520;520	1	20	0	32397	4.8	4.8	4.8	4.8	4.8	4.8	338910000	59503000	85031000	34583000	66696000	13035000	2288600	3270400	0.00190981	0.0020873
Exponential	tr|Q4DWN5|Q4DWN5_TRYCC;tr|Q4D355|Q4D355_TRYCC	tr|Q4DWN5|Q4DWN5_TRYCC;tr|Q4D355|Q4D355_TRYCC	1;1	1;1	1;1	>tr|Q4DWN5|Q4DWN5_TRYCC Exosome-associated protein 2, putative OS=Trypanosoma cruzi (strain CL Brener) GN=Tc00.1047053507089.80 PE=4 SV=1;>tr|Q4D355|Q4D355_TRYCC Exosome-associated protein 2, putative OS=Trypanosoma cruzi (strain CL Brener) GN=Tc00.1047053	2	1	1	1	2	0	0	1	1	0	0	1	1	0	0	1	1	8.3	8.3	8.3	29937	278	278;278	1	8	0	13569	0	0	0	0	8.3	8.3	187040000	0	0	63287000	123750000	15587000	0	0
Exponential	tr|Q4D258|Q4D258_TRYCC	tr|Q4D258|Q4D258_TRYCC	1	1	1	>tr|Q4D258|Q4D258_TRYCC Uncharacterized protein OS=Trypanosoma cruzi (strain CL Brener) GN=Tc00.1047053504111.10 PE=4 SV=1	1	1	1	1	4	1	1	1	1	1	1	1	1	1	1	1	1	2	2	2	87328	791	791	1	13	0.0031315	18835	2	2	2	2	2	2	841760000	50368000	84761000	334990000	356920000	23382000	1399100	2354500	0.00116753	0.00150273
Exponential	tr|Q4DZF2|Q4DZF2_TRYCC	tr|Q4DZF2|Q4DZF2_TRYCC	1	1	1	>tr|Q4DZF2|Q4DZF2_TRYCC Uncharacterized protein OS=Trypanosoma cruzi (strain CL Brener) GN=Tc00.1047053506825.100 PE=4 SV=1	1	1	1	1	2	0	0	1	1	0	0	1	1	0	0	1	1	1.5	1.5	1.5	102.06	926	926	1	6	0	26424	0	0	0	0	1.5	1.5	97559000	0	0	18864000	78695000	2120800	0	0
[truncated: 42 more columns]
