# Supplementary material for: Proteome-Wide Analysis of Trypanosoma cruzi Exponential and Stationary Growth Phases Reveals a Subcellular Compartment-Specific Regulation
Source: Genes (Basel). 2018 Aug 15;9(8):413. doi: 10.3390/genes9080413 (PMC6115888; doi:10.3390/genes9080413)
Supplement: Supplementary file 1 [file genes-09-00413-s001.zip › Supplementary Table 4.xlsx]

## Sheet: Supplementary Table 4
Supplementary table 4. Regulated uncharacterized proteins between the T.cruzi exponential and stationary phase
Exponential Phase Upregulated Uncharacterized Proteins
qseqid	sseqid	pident	length	mismatch	gapopen	qstart	qend	sstart	send	evalue	bitscore	Subject Title	Domain
gi|122014436|sp|Q4CNI8|Q4CNI8_TRYCR	gnl|CDD|308290	27,29	491	192	21	13	501	1	328	2e-64	215	pfam02595	Gly_kinase
gi|122015117|sp|Q4CQS3|Q4CQS3_TRYCR	gnl|CDD|309739	31,25	160	90	7	3	149	2	154	1e-45	150	pfam04729	ASF1_hist_chap
gi|122015169|sp|Q4CQY1|Q4CQY1_TRYCR	gnl|CDD|308765	31,09	193	102	3	18	198	1	174	6e-56	179	pfam03328	HpcH_HpaI
gi|122017013|sp|Q4CXB2|Q4CXB2_TRYCR	gnl|CDD|307607	16,73	263	164	9	154	412	4	215	0,0001	43,8	pfam01544	CorA
gi|122017111|sp|Q4CXN1|Q4CXN1_TRYCR	gnl|CDD|307672	22	150	93	7	8	154	2	130	0,0000008	46,7	pfam01652	IF4E
gi|122017163|sp|Q4CXV2|Q4CXV2_TRYCR	gnl|CDD|309535	34,53	223	99	8	79	301	1	176	1e-37	136	pfam04427	Brix
gi|122017285|sp|Q4CYA3|Q4CYA3_TRYCR	gnl|CDD|310458	37,2	336	184	7	58	391	1	311	1e-91	292	pfam05879	RHD3
gi|122017327|sp|Q4CYE8|Q4CYE8_TRYCR	gnl|CDD|318682	29,85	67	45	1	203	267	229	295	0,0002	44,4	pfam16529	Ge1_WD40
gi|122017346|sp|Q4CYG8|Q4CYG8_TRYCR	gnl|CDD|281621	28,89	135	85	6	188	317	1	129	1e-20	86,5	pfam03641	Lysine_decarbox
gi|122017842|sp|Q4D057|Q4D057_TRYCR	gnl|CDD|306689	34,04	47	30	1	38	84	15	60	0,0004	39,4	pfam00226	DnaJ
gi|122018983|sp|Q4D450|Q4D450_TRYCR	gnl|CDD|308778	34,13	167	108	2	33	198	5	170	2e-16	74,6	pfam03357	Snf7
gi|122019720|sp|Q4D6P0|Q4D6P0_TRYCR	gnl|CDD|319040	25,93	594	327	19	18	539	1	553	3e-54	195	pfam16969	SRP68
gi|122020369|sp|Q4D8Z3|Q4D8Z3_TRYCR	gnl|CDD|307856	34,04	94	49	5	406	490	2	91	1e-16	78,4	pfam01926	MMR_HSR1
gi|122020369|sp|Q4D8Z3|Q4D8Z3_TRYCR	gnl|CDD|309611	37,5	64	35	4	408	468	5	66	0,0003	42,6	pfam04548	AIG1
gi|122020369|sp|Q4D8Z3|Q4D8Z3_TRYCR	gnl|CDD|315327	34,62	78	38	3	171	248	168	232	0,0007	42,4	pfam12631	MnmE_helical
gi|122021353|sp|Q4DCC3|Q4DCC3_TRYCR	gnl|CDD|306830	33,33	39	26	0	101	139	1	39	0,0003	39,6	pfam00400	WD40
gi|122021702|sp|Q4DDK1|Q4DDK1_TRYCR	gnl|CDD|313324	18	100	76	2	52	148	17	113	0,00000004	50	pfam10075	CSN8_PSD8_EIF3K
gi|122021994|sp|Q4DEL9|Q4DEL9_TRYCR	gnl|CDD|306830	47,37	38	20	0	138	175	2	39	0,00006	41,6	pfam00400	WD40
gi|122021994|sp|Q4DEL9|Q4DEL9_TRYCR	gnl|CDD|306830	41,03	39	23	0	221	259	1	39	0,00008	41,2	pfam00400	WD40
gi|122022018|sp|Q4DEP5|Q4DEP5_TRYCR	gnl|CDD|280935	23,21	237	140	7	196	426	3	203	3e-14	73,9	pfam02854	MIF4G
gi|122022621|sp|Q4DGT6|Q4DGT6_TRYCR	gnl|CDD|308765	28,98	245	136	5	18	249	1	220	1e-68	215	pfam03328	HpcH_HpaI
gi|122022666|sp|Q4DGZ6|Q4DGZ6_TRYCR	gnl|CDD|306954	29,09	110	71	2	151	256	10	116	2e-10	57,9	pfam00583	Acetyltransf_1
gi|122022666|sp|Q4DGZ6|Q4DGZ6_TRYCR	gnl|CDD|316066	22,5	80	53	2	179	258	12	82	0,0003	39,4	pfam13508	Acetyltransf_7
gi|122022929|sp|Q4DHW4|Q4DHW4_TRYCR	gnl|CDD|314745	35,96	89	53	3	2118	2206	1	85	7e-24	100	pfam11919	DUF3437
gi|122023099|sp|Q4DIG9|Q4DIG9_TRYCR	gnl|CDD|308049	25	116	50	4	124	231	1	87	0,000000005	55,3	pfam02214	BTB_2
gi|122023099|sp|Q4DIG9|Q4DIG9_TRYCR	gnl|CDD|315978	31,37	51	31	2	366	415	1	48	0,00001	44,2	pfam13415	Kelch_3
gi|122023099|sp|Q4DIG9|Q4DIG9_TRYCR	gnl|CDD|315981	31,82	44	29	1	355	397	1	44	0,0005	39,9	pfam13418	Kelch_4
gi|122023296|sp|Q4DJ66|Q4DJ66_TRYCR	gnl|CDD|316375	31,5	127	77	4	198	324	77	193	0,000001	48	pfam13851	GAS
gi|122023296|sp|Q4DJ66|Q4DJ66_TRYCR	gnl|CDD|307627	26,77	127	74	2	211	320	461	585	0,001	40,5	pfam01576	Myosin_tail_1
gi|122024025|sp|Q4DLS0|Q4DLS0_TRYCR	gnl|CDD|283886	31,36	118	66	5	97	212	153	257	0,00000002	55	pfam06325	PrmA
gi|122024025|sp|Q4DLS0|Q4DLS0_TRYCR	gnl|CDD|316196	30,48	105	56	5	109	207	1	94	0,00000005	51,4	pfam13649	Methyltransf_25
gi|122024025|sp|Q4DLS0|Q4DLS0_TRYCR	gnl|CDD|310055	31,91	141	67	11	100	225	184	310	0,00001	46,9	pfam05185	PRMT5
gi|122024025|sp|Q4DLS0|Q4DLS0_TRYCR	gnl|CDD|311935	25	112	48	5	110	207	1	90	0,00001	44,2	pfam08241	Methyltransf_11
gi|122024025|sp|Q4DLS0|Q4DLS0_TRYCR	gnl|CDD|280612	31,03	87	59	1	90	175	84	170	0,0002	42	pfam02475	Met_10
gi|122024025|sp|Q4DLS0|Q4DLS0_TRYCR	gnl|CDD|311936	23,81	105	62	5	110	207	1	94	0,0005	39,3	pfam08242	Methyltransf_12
gi|122024160|sp|Q4DM81|Q4DM81_TRYCR	gnl|CDD|306510	54,48	134	54	3	143	275	2	129	3e-46	160	pfam00004	AAA
gi|122024160|sp|Q4DM81|Q4DM81_TRYCR	gnl|CDD|307544	37,44	203	121	3	344	540	8	210	7e-42	151	pfam01434	Peptidase_M41
gi|122024160|sp|Q4DM81|Q4DM81_TRYCR	gnl|CDD|311595	26,06	142	80	9	143	268	3	135	0,0001	42,3	pfam07728	AAA_5
gi|122024250|sp|Q4DMJ7|Q4DMJ7_TRYCR	gnl|CDD|309214	40,24	82	44	1	158	239	1	77	3e-18	80,7	pfam04000	Sas10_Utp3
gi|122024250|sp|Q4DMJ7|Q4DMJ7_TRYCR	gnl|CDD|312764	37,33	75	45	2	451	524	1	74	5e-16	74,5	pfam09368	Sas10
gi|122042554|sp|Q4DPD9|Q4DPD9_TRYCR	gnl|CDD|309001	33,44	299	195	3	302	600	1	295	8e-109	334	pfam03715	Noc2
gi|122042554|sp|Q4DPD9|Q4DPD9_TRYCR	gnl|CDD|313095	34,88	86	50	3	24	103	33	118	0,0007	39,9	pfam09805	Nop25
gi|122042619|sp|Q4DPM2|Q4DPM2_TRYCR	gnl|CDD|318996	21,84	206	141	6	235	433	6	198	2e-22	101	pfam16908	VPS13
gi|122042619|sp|Q4DPM2|Q4DPM2_TRYCR	gnl|CDD|315323	24,41	127	57	1	3	129	1	88	1e-17	84,6	pfam12624	Chorein_N
gi|122042619|sp|Q4DPM2|Q4DPM2_TRYCR	gnl|CDD|318997	30,19	106	69	2	4392	4497	66	166	7e-15	77,6	pfam16909	VPS13_C
gi|122042619|sp|Q4DPM2|Q4DPM2_TRYCR	gnl|CDD|318998	26,75	157	92	7	703	849	4	147	0,00000007	56,3	pfam16910	VPS13_mid_rpt
gi|122042619|sp|Q4DPM2|Q4DPM2_TRYCR	gnl|CDD|310922	22,79	136	92	4	3723	3854	8	134	0,0002	46,5	pfam06650	SHR-BD
gi|122042619|sp|Q4DPM2|Q4DPM2_TRYCR	gnl|CDD|312735	31,75	63	42	1	4506	4567	21	83	0,0008	42,5	pfam09333	ATG_C
gi|122042838|sp|Q4DQD4|Q4DQD4_TRYCR	gnl|CDD|308206	16,04	187	146	3	165	351	166	341	0,001	41,5	pfam02463	SMC_N
gi|122042841|sp|Q4DQD9|Q4DQD9_TRYCR	gnl|CDD|310099	25,77	163	96	9	9	161	29	176	0,000000002	53,3	pfam05241	EBP
gi|122043292|sp|Q4DS16|Q4DS16_TRYCR	gnl|CDD|310403	25	112	74	4	5	108	1	110	0,000000002	53,5	pfam05773	RWD
gi|122043292|sp|Q4DS16|Q4DS16_TRYCR	gnl|CDD|318694	34,92	63	34	3	147	207	20	77	0,0004	38,3	pfam16543	DFRP_C
gi|122043312|sp|Q4DS38|Q4DS38_TRYCR	gnl|CDD|313469	19,62	209	151	5	156	356	120	319	0,0001	44,5	pfam10243	MIP-T3
gi|122043561|sp|Q4DSZ0|Q4DSZ0_TRYCR	gnl|CDD|318193	21,91	607	406	17	92	645	279	870	0,000000008	59,4	pfam15921	CCDC158
gi|122043561|sp|Q4DSZ0|Q4DSZ0_TRYCR	gnl|CDD|318193	20,29	483	320	13	71	514	345	801	0,000004	50,5	pfam15921	CCDC158
gi|122043561|sp|Q4DSZ0|Q4DSZ0_TRYCR	gnl|CDD|318193	20,12	343	251	9	261	598	78	402	0,0008	42,8	pfam15921	CCDC158
gi|122043561|sp|Q4DSZ0|Q4DSZ0_TRYCR	gnl|CDD|314924	16,42	475	340	13	89	541	454	893	0,000000008	59,3	pfam12128	DUF3584
gi|122043561|sp|Q4DSZ0|Q4DSZ0_TRYCR	gnl|CDD|314924	18,13	535	362	19	70	558	257	761	0,0001	45,5	pfam12128	DUF3584
gi|122043561|sp|Q4DSZ0|Q4DSZ0_TRYCR	gnl|CDD|307627	22,32	439	294	9	90	498	84	505	0,0000004	53,6	pfam01576	Myosin_tail_1
gi|122043561|sp|Q4DSZ0|Q4DSZ0_TRYCR	gnl|CDD|311715	20,78	332	233	8	90	415	156	463	0,00001	48,3	pfam07888	CALCOCO1
gi|122043561|sp|Q4DSZ0|Q4DSZ0_TRYCR	gnl|CDD|311715	18,91	386	253	13	198	557	137	488	0,00008	46	pfam07888	CALCOCO1
gi|122043561|sp|Q4DSZ0|Q4DSZ0_TRYCR	gnl|CDD|318177	21,07	242	165	5	88	316	103	331	0,00007	45,6	pfam15905	HMMR_N
gi|122043561|sp|Q4DSZ0|Q4DSZ0_TRYCR	gnl|CDD|309295	21,74	138	98	4	136	271	8	137	0,0001	44,9	pfam04111	APG6
gi|122043561|sp|Q4DSZ0|Q4DSZ0_TRYCR	gnl|CDD|308892	21,07	299	181	9	81	329	32	325	0,0004	43,6	pfam03528	Rabaptin
gi|122043561|sp|Q4DSZ0|Q4DSZ0_TRYCR	gnl|CDD|310310	19,81	313	212	7	88	382	364	655	0,0004	43,5	pfam05622	HOOK
gi|122044001|sp|Q4DUF6|Q4DUF6_TRYCR	gnl|CDD|280935	24,89	229	141	6	61	285	1	202	3e-25	104	pfam02854	MIF4G
gi|122045972|sp|Q4E1B5|Q4E1B5_TRYCR	gnl|CDD|311829	28	75	51	1	152	223	1	75	8e-18	77,5	pfam08059	SEP
gi|122046138|sp|Q4E1W2|Q4E1W2_TRYCR	gnl|CDD|307636	17,78	495	298	20	17	466	2	432	3e-18	87,2	pfam01593	Amino_oxidase
gi|122046138|sp|Q4E1W2|Q4E1W2_TRYCR	gnl|CDD|316012	31,82	66	43	2	11	76	1	64	0,0000001	50,2	pfam13450	NAD_binding_8
gi|122046139|sp|Q4E1W3|Q4E1W3_TRYCR	gnl|CDD|312661	33,33	126	78	3	29	149	1	125	7e-36	128	pfam09229	Aha1_N
gi|122046139|sp|Q4E1W3|Q4E1W3_TRYCR	gnl|CDD|311986	31,2	125	75	5	211	326	3	125	1e-11	61,6	pfam08327	AHSA1
gi|122046855|sp|Q4E4C5|Q4E4C5_TRYCR	gnl|CDD|307328	27,75	209	85	5	2	208	1	145	8e-53	170	pfam01125	G10
gi|122046856|sp|Q4E4C6|Q4E4C6_TRYCR	gnl|CDD|307399	31,76	85	55	1	25	109	2	83	6e-20	79,5	pfam01221	Dynein_light
gi|122047203|sp|Q4E5L5|Q4E5L5_TRYCR	gnl|CDD|310470	38,97	136	73	6	8	134	3	137	7e-40	134	pfam05907	DUF866
gi|122080542|sp|Q4CY83|Q4CY83_TRYCR	gnl|CDD|315466	32,56	86	56	2	150	235	1	84	0,000000001	55,1	pfam12796	Ank_2
gi|122080542|sp|Q4CY83|Q4CY83_TRYCR	gnl|CDD|315466	28,3	53	37	1	185	236	1	53	0,00003	42,8	pfam12796	Ank_2
gi|122080542|sp|Q4CY83|Q4CY83_TRYCR	gnl|CDD|316185	30,19	53	36	1	181	232	1	53	0,0000002	48,8	pfam13637	Ank_4
gi|122080739|sp|Q4D4H3|Q4D4H3_TRYCR	gnl|CDD|319190	43,53	85	46	2	86	169	1	84	2e-24	96,5	pfam17172	GST_N_4
gi|122080739|sp|Q4D4H3|Q4D4H3_TRYCR	gnl|CDD|313732	28,24	85	56	3	76	156	2	85	3e-14	69,1	pfam10568	Tom37
gi|122080739|sp|Q4D4H3|Q4D4H3_TRYCR	gnl|CDD|319189	28,33	60	40	3	237	294	6	64	0,000001	46,3	pfam17171	GST_C_6
gi|122080739|sp|Q4D4H3|Q4D4H3_TRYCR	gnl|CDD|315980	23,08	65	42	2	86	143	8	71	0,0002	39,5	pfam13417	GST_N_3
gi|122081233|sp|Q4DQM2|Q4DQM2_TRYCR	gnl|CDD|315466	42,47	73	38	2	4	76	1	69	0,000000002	55,5	pfam12796	Ank_2
gi|122081233|sp|Q4DQM2|Q4DQM2_TRYCR	gnl|CDD|315466	35,59	59	36	1	4	62	34	90	0,0002	41,2	pfam12796	Ank_2
gi|122081233|sp|Q4DQM2|Q4DQM2_TRYCR	gnl|CDD|314939	20,99	243	136	14	244	449	7	230	0,000000005	56,4	pfam12146	Hydrolase_4
gi|122081233|sp|Q4DQM2|Q4DQM2_TRYCR	gnl|CDD|306935	18,29	246	159	8	244	453	3	242	0,00000002	54,4	pfam00561	Abhydrolase_1
gi|122081233|sp|Q4DQM2|Q4DQM2_TRYCR	gnl|CDD|315385	21,78	225	159	8	244	463	1	213	0,00000003	54	pfam12697	Abhydrolase_6
gi|122081233|sp|Q4DQM2|Q4DQM2_TRYCR	gnl|CDD|278741	36,92	65	36	2	411	471	146	209	0,000008	46,8	pfam00326	Peptidase_S9
gi|122081233|sp|Q4DQM2|Q4DQM2_TRYCR	gnl|CDD|316185	44,44	54	29	1	1	54	2	54	0,00002	43,4	pfam13637	Ank_4
gi|122081233|sp|Q4DQM2|Q4DQM2_TRYCR	gnl|CDD|316380	32,14	56	36	1	21	76	3	56	0,00004	42,4	pfam13857	Ank_5
gi|122113402|sp|Q4DKP1|Q4DKP1_TRYCR	gnl|CDD|306830	43,59	39	22	0	170	208	1	39	0,0000003	48,1	pfam00400	WD40
gi|122113402|sp|Q4DKP1|Q4DKP1_TRYCR	gnl|CDD|306830	42,5	40	22	1	127	166	1	39	0,000002	46,2	pfam00400	WD40
gi|122113402|sp|Q4DKP1|Q4DKP1_TRYCR	gnl|CDD|306830	33,33	39	26	0	296	334	1	39	0,000003	45,4	pfam00400	WD40
gi|122113402|sp|Q4DKP1|Q4DKP1_TRYCR	gnl|CDD|306830	38,46	39	24	0	254	292	1	39	0,00001	43,5	pfam00400	WD40
gi|122113402|sp|Q4DKP1|Q4DKP1_TRYCR	gnl|CDD|306830	46,15	39	21	0	212	250	1	39	0,00002	42,7	pfam00400	WD40
gi|122113402|sp|Q4DKP1|Q4DKP1_TRYCR	gnl|CDD|306830	36,84	38	24	0	380	417	1	38	0,00003	42,7	pfam00400	WD40
gi|122113402|sp|Q4DKP1|Q4DKP1_TRYCR	gnl|CDD|306830	26,32	38	28	0	339	376	2	39	0,00003	42,3	pfam00400	WD40
gi|122113402|sp|Q4DKP1|Q4DKP1_TRYCR	gnl|CDD|306830	42,86	35	20	0	89	123	5	39	0,0001	40,8	pfam00400	WD40
gi|122113402|sp|Q4DKP1|Q4DKP1_TRYCR	gnl|CDD|315554	29,23	65	39	1	205	269	28	85	0,00007	41,9	pfam12894	ANAPC4_WD40
gi|122113619|sp|Q4E2U5|Q4E2U5_TRYCR	gnl|CDD|278915	48,78	41	21	0	549	589	1	41	0,0000006	49	pfam00514	Arm
gi|122113633|sp|Q4E413|Q4E413_TRYCR	gnl|CDD|306897	36,36	66	37	4	91	155	3	64	0,000000008	53,7	pfam00498	FHA
gi|122113633|sp|Q4E413|Q4E413_TRYCR	gnl|CDD|306580	35	40	26	0	193	232	1	40	0,000001	47	pfam00097	zf-C3HC4
gi|122125003|sp|Q4D622|Q4D622_TRYCR	gnl|CDD|308206	17,83	286	226	5	395	680	733	1009	0,00000006	56,5	pfam02463	SMC_N
gi|122125003|sp|Q4D622|Q4D622_TRYCR	gnl|CDD|308206	17,13	327	260	7	365	683	711	1034	0,0000005	53,8	pfam02463	SMC_N
gi|122125003|sp|Q4D622|Q4D622_TRYCR	gnl|CDD|308206	15,92	289	220	6	428	703	146	424	0,000006	50	pfam02463	SMC_N
gi|122125003|sp|Q4D622|Q4D622_TRYCR	gnl|CDD|308206	17,19	221	168	5	392	602	288	503	0,001	43	pfam02463	SMC_N
gi|122125003|sp|Q4D622|Q4D622_TRYCR	gnl|CDD|316391	16,15	291	216	6	400	684	82	350	0,0000004	53	pfam13868	TPH
gi|122125003|sp|Q4D622|Q4D622_TRYCR	gnl|CDD|308892	24,86	173	123	5	401	570	45	213	0,0000004	53,2	pfam03528	Rabaptin
gi|122125003|sp|Q4D622|Q4D622_TRYCR	gnl|CDD|308892	26,97	178	86	9	402	542	163	333	0,00003	47,8	pfam03528	Rabaptin
gi|122125003|sp|Q4D622|Q4D622_TRYCR	gnl|CDD|307627	24,41	295	162	13	401	665	3	266	0,000005	50,2	pfam01576	Myosin_tail_1
gi|122125003|sp|Q4D622|Q4D622_TRYCR	gnl|CDD|311715	23,03	317	189	10	403	685	154	449	0,000009	49,1	pfam07888	CALCOCO1
gi|122125003|sp|Q4D622|Q4D622_TRYCR	gnl|CDD|318010	28,92	166	94	8	404	548	342	504	0,00002	47,7	pfam15709	DUF4670
gi|122125003|sp|Q4D622|Q4D622_TRYCR	gnl|CDD|318010	27,8	205	124	8	410	601	321	514	0,00003	47,7	pfam15709	DUF4670
gi|122125003|sp|Q4D622|Q4D622_TRYCR	gnl|CDD|313022	25,23	214	108	9	365	527	395	607	0,00007	46,4	pfam09726	Macoilin
gi|122125003|sp|Q4D622|Q4D622_TRYCR	gnl|CDD|313022	22,35	255	142	11	478	724	397	603	0,00009	46	pfam09726	Macoilin
gi|122125003|sp|Q4D622|Q4D622_TRYCR	gnl|CDD|314924	17,48	309	206	9	394	671	635	925	0,0001	45,8	pfam12128	DUF3584
gi|122125003|sp|Q4D622|Q4D622_TRYCR	gnl|CDD|282014	24,65	215	146	6	399	613	461	659	0,0002	45,6	pfam04094	DUF390
gi|122125003|sp|Q4D622|Q4D622_TRYCR	gnl|CDD|318177	23,87	243	147	11	392	613	93	318	0,0002	44,8	pfam15905	HMMR_N
gi|122125003|sp|Q4D622|Q4D622_TRYCR	gnl|CDD|310310	25,52	145	88	6	417	547	453	591	0,0003	44,3	pfam05622	HOOK
gi|122125003|sp|Q4D622|Q4D622_TRYCR	gnl|CDD|310345	26,95	141	87	3	402	542	14	138	0,0004	42	pfam05672	MAP7
gi|122125003|sp|Q4D622|Q4D622_TRYCR	gnl|CDD|313461	26,32	133	77	4	401	527	140	257	0,0004	43,3	pfam10234	Cluap1
gi|122125003|sp|Q4D622|Q4D622_TRYCR	gnl|CDD|307125	30,34	89	52	1	411	489	46	134	0,0004	41,1	pfam00836	Stathmin
gi|122125003|sp|Q4D622|Q4D622_TRYCR	gnl|CDD|318623	25,68	74	44	3	700	766	4	73	0,0006	40,7	pfam16457	PH_12
gi|122125003|sp|Q4D622|Q4D622_TRYCR	gnl|CDD|309164	14,81	108	82	4	430	531	32	135	0,0006	41	pfam03938	OmpH
gi|122125003|sp|Q4D622|Q4D622_TRYCR	gnl|CDD|309164	35,44	79	50	1	460	537	41	119	0,0006	41	pfam03938	OmpH
gi|122125003|sp|Q4D622|Q4D622_TRYCR	gnl|CDD|310273	15,79	190	139	3	401	585	35	208	0,0007	43,2	pfam05557	MAD
gi|122125003|sp|Q4D622|Q4D622_TRYCR	gnl|CDD|310341	23,81	126	83	7	402	521	350	468	0,0008	43,1	pfam05667	DUF812
gi|122125003|sp|Q4D622|Q4D622_TRYCR	gnl|CDD|307079	20,48	83	63	1	467	546	7	89	0,001	41,8	pfam00769	ERM
gi|122125179|sp|Q4DHU1|Q4DHU1_TRYCR	gnl|CDD|306933	23,35	167	97	5	118	282	2	139	2e-11	63,4	pfam00557	Peptidase_M24
gi|122125194|sp|Q4DIQ5|Q4DIQ5_TRYCR	gnl|CDD|310778	22,22	216	113	11	453	652	7	183	7e-13	68,5	pfam06414	Zeta_toxin
gi|122125473|sp|Q4E1Q3|Q4E1Q3_TRYCR	gnl|CDD|309322	23,08	143	68	10	230	344	3	131	0,00009	42,1	pfam04146	YTH
gi|122125473|sp|Q4E1Q3|Q4E1Q3_TRYCR	gnl|CDD|278504	28	50	36	0	90	139	1	50	0,0001	41	pfam00076	RRM_1
gi|122129270|sp|Q4CW73|Q4CW73_TRYCR	gnl|CDD|307898	38,38	99	60	1	8	106	8	105	1e-18	76,4	pfam01984	dsDNA_bind
Stationary Phase Upregulated Uncharacterized Proteins
qseqid	sseqid	pident	length	mismatch	gapopen	qstart	qend	sstart	send	evalue	bitscore	Subject Title	Domain
gi|122015760|sp|Q4CT11|Q4CT11_TRYCR	gnl|CDD|313022	24,63	203	113	7	440	638	407	573	0,0006	43,7	pfam09726	Macoilin
gi|122015760|sp|Q4CT11|Q4CT11_TRYCR	gnl|CDD|316850	22,3	139	91	3	430	553	103	239	0,0007	42,6	pfam14362	DUF4407
gi|122014077|sp|Q4CMC7|Q4CMC7_TRYCR	gnl|CDD|284279	19,32	207	129	5	98	289	63	246	0,00000002	55,4	pfam06813	Nodulin-like
gi|122014077|sp|Q4CMC7|Q4CMC7_TRYCR	gnl|CDD|311564	17,84	269	204	6	28	291	1	257	0,0000002	53,6	pfam07690	MFS_1
gi|122015797|sp|Q4CT56|Q4CT56_TRYCR	gnl|CDD|308206	12,5	856	723	6	672	1520	183	1019	4e-10	65	pfam02463	SMC_N
gi|122015797|sp|Q4CT56|Q4CT56_TRYCR	gnl|CDD|308206	12,44	852	719	6	579	1422	187	1019	7e-10	64,2	pfam02463	SMC_N
gi|122015797|sp|Q4CT56|Q4CT56_TRYCR	gnl|CDD|308206	12,19	837	725	4	970	1800	187	1019	0,000000006	61,1	pfam02463	SMC_N
gi|122015797|sp|Q4CT56|Q4CT56_TRYCR	gnl|CDD|308206	12,23	842	719	4	746	1576	187	1019	0,000000007	60,8	pfam02463	SMC_N
gi|122015797|sp|Q4CT56|Q4CT56_TRYCR	gnl|CDD|308206	11,84	828	716	4	480	1299	187	1008	0,0000001	56,5	pfam02463	SMC_N
gi|122015797|sp|Q4CT56|Q4CT56_TRYCR	gnl|CDD|308206	11,15	852	739	5	316	1156	175	1019	0,0000002	56,1	pfam02463	SMC_N
gi|122015797|sp|Q4CT56|Q4CT56_TRYCR	gnl|CDD|308206	13,38	792	659	6	113	890	222	1000	0,000006	51,1	pfam02463	SMC_N
gi|122015797|sp|Q4CT56|Q4CT56_TRYCR	gnl|CDD|308206	12,1	843	715	6	154	974	181	1019	0,00005	48,4	pfam02463	SMC_N
gi|122015797|sp|Q4CT56|Q4CT56_TRYCR	gnl|CDD|314924	17,86	683	503	16	343	989	244	904	0,00000005	58,2	pfam12128	DUF3584
gi|122015797|sp|Q4CT56|Q4CT56_TRYCR	gnl|CDD|314924	18,31	710	524	18	989	1670	215	896	0,0000005	54,7	pfam12128	DUF3584
gi|122015797|sp|Q4CT56|Q4CT56_TRYCR	gnl|CDD|314924	17,55	507	381	13	590	1079	281	767	0,000004	52	pfam12128	DUF3584
gi|122015797|sp|Q4CT56|Q4CT56_TRYCR	gnl|CDD|314924	17,31	543	409	13	1262	1779	240	767	0,00001	50,1	pfam12128	DUF3584
gi|122015797|sp|Q4CT56|Q4CT56_TRYCR	gnl|CDD|314924	16,43	718	551	17	940	1637	240	928	0,001	43,9	pfam12128	DUF3584
gi|122015797|sp|Q4CT56|Q4CT56_TRYCR	gnl|CDD|307627	20,83	845	627	10	589	1425	91	901	0,00001	50,2	pfam01576	Myosin_tail_1
gi|122015797|sp|Q4CT56|Q4CT56_TRYCR	gnl|CDD|307627	21,42	831	625	7	925	1747	91	901	0,00003	48,6	pfam01576	Myosin_tail_1
gi|122015797|sp|Q4CT56|Q4CT56_TRYCR	gnl|CDD|307627	20,43	1013	764	12	729	1729	91	1073	0,0003	45,6	pfam01576	Myosin_tail_1
gi|122015797|sp|Q4CT56|Q4CT56_TRYCR	gnl|CDD|316850	23,57	140	100	4	1055	1192	105	239	0,00003	48	pfam14362	DUF4407
gi|122015797|sp|Q4CT56|Q4CT56_TRYCR	gnl|CDD|316850	24,65	142	94	5	1615	1751	105	238	0,00008	46,5	pfam14362	DUF4407
gi|122015797|sp|Q4CT56|Q4CT56_TRYCR	gnl|CDD|316850	25,88	170	113	6	677	844	105	263	0,0001	45,7	pfam14362	DUF4407
gi|122015797|sp|Q4CT56|Q4CT56_TRYCR	gnl|CDD|316850	24,53	159	108	5	1557	1714	103	250	0,0003	44,9	pfam14362	DUF4407
gi|122015797|sp|Q4CT56|Q4CT56_TRYCR	gnl|CDD|316850	20,57	141	100	4	554	688	105	239	0,0004	44,5	pfam14362	DUF4407
gi|122015797|sp|Q4CT56|Q4CT56_TRYCR	gnl|CDD|316850	19,59	148	113	3	1650	1794	95	239	0,0005	44,1	pfam14362	DUF4407
gi|122015797|sp|Q4CT56|Q4CT56_TRYCR	gnl|CDD|316850	23,94	142	101	4	1333	1472	103	239	0,0005	43,8	pfam14362	DUF4407
gi|122015797|sp|Q4CT56|Q4CT56_TRYCR	gnl|CDD|316850	22,39	134	81	5	1037	1150	109	239	0,0007	43,4	pfam14362	DUF4407
gi|122015797|sp|Q4CT56|Q4CT56_TRYCR	gnl|CDD|316850	23,57	140	100	4	1363	1500	105	239	0,0008	43,4	pfam14362	DUF4407
gi|122015797|sp|Q4CT56|Q4CT56_TRYCR	gnl|CDD|316850	25	144	95	5	1445	1583	103	238	0,0009	43,4	pfam14362	DUF4407
gi|122015797|sp|Q4CT56|Q4CT56_TRYCR	gnl|CDD|311715	23,78	307	216	6	717	1008	140	443	0,0001	47,2	pfam07888	CALCOCO1
gi|122015797|sp|Q4CT56|Q4CT56_TRYCR	gnl|CDD|311715	21,81	353	254	8	523	870	149	484	0,0004	44,8	pfam07888	CALCOCO1
gi|122015797|sp|Q4CT56|Q4CT56_TRYCR	gnl|CDD|311715	22,5	320	224	7	830	1138	141	447	0,0006	44,5	pfam07888	CALCOCO1
gi|122015797|sp|Q4CT56|Q4CT56_TRYCR	gnl|CDD|311715	24,21	347	219	10	648	994	141	443	0,0008	44,1	pfam07888	CALCOCO1
gi|122015797|sp|Q4CT56|Q4CT56_TRYCR	gnl|CDD|311715	23,24	370	243	10	410	768	141	480	0,0008	44,1	pfam07888	CALCOCO1
gi|122015797|sp|Q4CT56|Q4CT56_TRYCR	gnl|CDD|311715	24,05	316	224	5	1432	1740	141	447	0,001	43,7	pfam07888	CALCOCO1
gi|122016182|sp|Q4CUG0|Q4CUG0_TRYCR	gnl|CDD|284279	19,12	204	128	4	33	221	63	244	0,00000001	55,4	pfam06813	Nodulin-like
gi|122016503|sp|Q4CVJ1|Q4CVJ1_TRYCR	gnl|CDD|310253	40,25	159	76	6	4	148	1	154	3e-39	132	pfam05517	p25-alpha
gi|122017599|sp|Q4CZB7|Q4CZB7_TRYCR	gnl|CDD|308983	48,07	362	137	8	32	390	1	314	5e-169	479	pfam03690	UPF0160
gi|122017818|sp|Q4D029|Q4D029_TRYCR	gnl|CDD|252675	22,73	66	50	1	540	604	2	67	0,00008	42,3	pfam04564	U-box
gi|122018005|sp|Q4D0Q5|Q4D0Q5_TRYCR	gnl|CDD|316391	39,88	341	205	0	119	459	1	341	2e-47	169	pfam13868	TPH
gi|122019436|sp|Q4D5P2|Q4D5P2_TRYCR	gnl|CDD|309410	21,88	64	39	2	343	405	10	63	0,00005	42,4	pfam04265	TPK_B1_binding
gi|122019436|sp|Q4D5P2|Q4D5P2_TRYCR	gnl|CDD|309408	52,17	23	11	0	288	310	81	103	0,0001	41,7	pfam04263	TPK_catalytic
gi|122019615|sp|Q4D6B1|Q4D6B1_TRYCR	gnl|CDD|316391	24,85	169	125	1	176	342	82	250	0,00008	43,7	pfam13868	TPH
gi|122020224|sp|Q4D8H6|Q4D8H6_TRYCR	gnl|CDD|314359	46,23	385	168	7	78	457	1	351	0	520	pfam11397	GlcNAc
gi|122020376|sp|Q4D905|Q4D905_TRYCR	gnl|CDD|308983	48,07	362	137	8	32	390	1	314	2e-177	500	pfam03690	UPF0160
gi|122021451|sp|Q4DCN7|Q4DCN7_TRYCR	gnl|CDD|314036	36,96	349	198	9	47	382	1	340	8e-134	390	pfam10994	DUF2817
gi|122021596|sp|Q4DD65|Q4DD65_TRYCR	gnl|CDD|313027	18,5	200	151	6	1053	1249	46	236	0,00000001	60,1	pfam09731	Mitofilin
gi|122021596|sp|Q4DD65|Q4DD65_TRYCR	gnl|CDD|114603	28	100	66	2	1146	1244	38	132	0,00000001	56,9	pfam05887	Trypan_PARP
gi|122021596|sp|Q4DD65|Q4DD65_TRYCR	gnl|CDD|114603	31,4	86	56	2	1133	1216	43	127	0,0000002	52,7	pfam05887	Trypan_PARP
gi|122021596|sp|Q4DD65|Q4DD65_TRYCR	gnl|CDD|114603	25	88	66	0	1076	1163	43	130	0,0000003	52,3	pfam05887	Trypan_PARP
gi|122021596|sp|Q4DD65|Q4DD65_TRYCR	gnl|CDD|114603	32,41	108	64	3	1082	1188	27	126	0,0000004	51,9	pfam05887	Trypan_PARP
gi|122021596|sp|Q4DD65|Q4DD65_TRYCR	gnl|CDD|114603	28,16	103	65	2	1085	1187	47	140	0,0000005	51,5	pfam05887	Trypan_PARP
gi|122021596|sp|Q4DD65|Q4DD65_TRYCR	gnl|CDD|114603	26,67	105	66	3	1114	1218	41	134	0,000002	50	pfam05887	Trypan_PARP
gi|122021596|sp|Q4DD65|Q4DD65_TRYCR	gnl|CDD|114603	28,42	95	67	1	1094	1187	41	135	0,000002	50	pfam05887	Trypan_PARP
gi|122021596|sp|Q4DD65|Q4DD65_TRYCR	gnl|CDD|318258	24,6	252	148	8	1025	1240	54	299	0,00000001	59,2	pfam16001	DUF4775
gi|122021596|sp|Q4DD65|Q4DD65_TRYCR	gnl|CDD|313469	20,3	202	145	4	1075	1262	90	289	0,00000003	58,3	pfam10243	MIP-T3
gi|122021596|sp|Q4DD65|Q4DD65_TRYCR	gnl|CDD|313469	18,46	130	102	1	1081	1210	66	191	0,00002	49,5	pfam10243	MIP-T3
gi|122021596|sp|Q4DD65|Q4DD65_TRYCR	gnl|CDD|313469	20,62	194	143	5	1063	1256	118	300	0,00009	47,2	pfam10243	MIP-T3
gi|122021596|sp|Q4DD65|Q4DD65_TRYCR	gnl|CDD|191249	20,67	179	120	4	1079	1255	68	226	0,00000006	55,7	pfam05279	Asp-B-Hydro_N
gi|122021596|sp|Q4DD65|Q4DD65_TRYCR	gnl|CDD|310221	26,6	203	110	8	1086	1250	16	217	0,00000007	55,4	pfam05466	BASP1
gi|122021596|sp|Q4DD65|Q4DD65_TRYCR	gnl|CDD|310221	27,33	172	107	6	1087	1254	7	164	0,0000006	52,7	pfam05466	BASP1
gi|122021596|sp|Q4DD65|Q4DD65_TRYCR	gnl|CDD|310221	26,9	171	108	5	1078	1237	71	235	0,00004	46,9	pfam05466	BASP1
gi|122021596|sp|Q4DD65|Q4DD65_TRYCR	gnl|CDD|310221	28,08	146	85	6	1077	1202	80	225	0,0002	45	pfam05466	BASP1
gi|122021596|sp|Q4DD65|Q4DD65_TRYCR	gnl|CDD|310221	29,19	161	87	8	1057	1209	81	222	0,0002	45	pfam05466	BASP1
gi|122021596|sp|Q4DD65|Q4DD65_TRYCR	gnl|CDD|312868	20,25	163	110	3	1086	1248	142	284	0,000002	52,5	pfam09507	CDC27
gi|122021596|sp|Q4DD65|Q4DD65_TRYCR	gnl|CDD|312868	15,9	195	152	4	1063	1256	155	338	0,0003	45,6	pfam09507	CDC27
gi|122021596|sp|Q4DD65|Q4DD65_TRYCR	gnl|CDD|310411	20,97	186	135	5	1072	1251	285	464	0,000002	52,6	pfam05793	TFIIF_alpha
gi|122021596|sp|Q4DD65|Q4DD65_TRYCR	gnl|CDD|307950	27,54	138	93	4	1079	1210	140	276	0,000009	49,7	pfam02063	MARCKS
gi|122021596|sp|Q4DD65|Q4DD65_TRYCR	gnl|CDD|307950	30,56	108	66	4	1090	1196	186	285	0,0002	45,1	pfam02063	MARCKS
gi|122021596|sp|Q4DD65|Q4DD65_TRYCR	gnl|CDD|114011	25,73	171	112	6	1086	1252	205	364	0,00001	50	pfam05262	Borrelia_P83
gi|122021596|sp|Q4DD65|Q4DD65_TRYCR	gnl|CDD|311769	17,65	153	111	3	1088	1227	472	622	0,00001	50,2	pfam07964	Red1
gi|122021596|sp|Q4DD65|Q4DD65_TRYCR	gnl|CDD|315836	18,42	190	134	5	1063	1238	162	344	0,00004	47,9	pfam13254	DUF4045
gi|122021596|sp|Q4DD65|Q4DD65_TRYCR	gnl|CDD|315836	21,24	193	138	8	1061	1247	196	380	0,00007	47,1	pfam13254	DUF4045
gi|122021596|sp|Q4DD65|Q4DD65_TRYCR	gnl|CDD|311221	21,35	178	109	6	1129	1289	11	174	0,0002	45,9	pfam07139	DUF1387
gi|122021596|sp|Q4DD65|Q4DD65_TRYCR	gnl|CDD|314409	22,97	209	129	13	1055	1244	394	589	0,0005	45	pfam11489	Aim21
gi|122021596|sp|Q4DD65|Q4DD65_TRYCR	gnl|CDD|313524	18,89	180	112	7	1092	1262	3	157	0,0007	44,2	pfam10310	Mtc1
gi|122021596|sp|Q4DD65|Q4DD65_TRYCR	gnl|CDD|314556	31,67	60	41	0	1150	1209	189	248	0,0007	44,1	pfam11711	Tim54
gi|122021596|sp|Q4DD65|Q4DD65_TRYCR	gnl|CDD|309995	27,48	131	83	5	1129	1250	32	159	0,0009	41,9	pfam05104	Rib_recp_KP_reg
gi|122021596|sp|Q4DD65|Q4DD65_TRYCR	gnl|CDD|311369	27,33	150	103	1	1094	1243	7	150	0,001	42,1	pfam07382	HC2
gi|122021636|sp|Q4DDB3|Q4DDB3_TRYCR	gnl|CDD|316372	22,45	196	92	6	129	318	5	146	0,0000003	49,3	pfam13847	Methyltransf_31
gi|122021636|sp|Q4DDB3|Q4DDB3_TRYCR	gnl|CDD|311935	22,88	153	61	3	132	284	1	96	0,0000005	48,1	pfam08241	Methyltransf_11
gi|122021636|sp|Q4DDB3|Q4DDB3_TRYCR	gnl|CDD|311936	20,92	153	64	2	132	282	1	98	0,000001	47	pfam08242	Methyltransf_12
gi|122021636|sp|Q4DDB3|Q4DDB3_TRYCR	gnl|CDD|316196	32,79	61	33	3	132	191	2	55	0,000002	46,4	pfam13649	Methyltransf_25
gi|122022668|sp|Q4DGZ9|Q4DGZ9_TRYCR	gnl|CDD|116521	68,48	514	145	3	14	510	1	514	0	687	pfam07909	DUF1663
gi|122022668|sp|Q4DGZ9|Q4DGZ9_TRYCR	gnl|CDD|116521	45,5	444	90	14	739	1030	2	445	3e-65	230	pfam07909	DUF1663
gi|122022668|sp|Q4DGZ9|Q4DGZ9_TRYCR	gnl|CDD|116521	41,51	489	157	15	543	910	1	481	2e-63	225	pfam07909	DUF1663
gi|122022668|sp|Q4DGZ9|Q4DGZ9_TRYCR	gnl|CDD|116521	46,98	381	85	12	804	1067	2	382	2e-56	205	pfam07909	DUF1663
gi|122022668|sp|Q4DGZ9|Q4DGZ9_TRYCR	gnl|CDD|116521	42,69	417	167	12	526	878	106	514	2e-52	194	pfam07909	DUF1663
gi|122022668|sp|Q4DGZ9|Q4DGZ9_TRYCR	gnl|CDD|116521	34,04	141	23	5	998	1068	1	141	0,0006	43,6	pfam07909	DUF1663
gi|122023168|sp|Q4DIP8|Q4DIP8_TRYCR	gnl|CDD|310253	40,25	159	76	7	4	148	1	154	2e-37	128	pfam05517	p25-alpha
gi|122023270|sp|Q4DJ37|Q4DJ37_TRYCR	gnl|CDD|316393	36,84	171	108	0	209	379	1	171	2e-28	110	pfam13870	DUF4201
gi|122023270|sp|Q4DJ37|Q4DJ37_TRYCR	gnl|CDD|310473	26,43	140	81	6	193	319	37	167	0,0003	42,7	pfam05911	FPP
gi|122024499|sp|Q4DND9|Q4DND9_TRYCR	gnl|CDD|308206	14,77	745	594	9	19	726	172	912	0,00000002	58,1	pfam02463	SMC_N
gi|122024499|sp|Q4DND9|Q4DND9_TRYCR	gnl|CDD|308206	14,93	737	597	7	4	737	322	1031	0,0003	44,6	pfam02463	SMC_N
gi|122024499|sp|Q4DND9|Q4DND9_TRYCR	gnl|CDD|314924	19,11	560	406	16	20	549	342	884	0,00000002	57,8	pfam12128	DUF3584
gi|122024499|sp|Q4DND9|Q4DND9_TRYCR	gnl|CDD|318193	20,3	665	410	21	79	701	91	677	0,000009	49,3	pfam15921	CCDC158
gi|122024499|sp|Q4DND9|Q4DND9_TRYCR	gnl|CDD|311715	22,34	197	140	3	243	430	118	310	0,0005	43,3	pfam07888	CALCOCO1
gi|122024499|sp|Q4DND9|Q4DND9_TRYCR	gnl|CDD|114219	19,13	643	430	17	16	648	201	763	0,0008	42,8	pfam05483	SCP-1
gi|122042400|sp|Q4DNU7|Q4DNU7_TRYCR	gnl|CDD|309519	30,1	103	57	2	1790	1877	1	103	2e-14	73,4	pfam04408	HA2
gi|122042400|sp|Q4DNU7|Q4DNU7_TRYCR	gnl|CDD|306726	20,16	124	68	2	1602	1725	16	108	2e-11	64,5	pfam00271	Helicase_C
gi|122042400|sp|Q4DNU7|Q4DNU7_TRYCR	gnl|CDD|306725	25	160	105	8	1337	1487	5	158	3e-10	62,3	pfam00270	DEAD
gi|122042400|sp|Q4DNU7|Q4DNU7_TRYCR	gnl|CDD|311586	20	130	80	5	1919	2044	1	110	0,000002	49,6	pfam07717	OB_NTP_bind
gi|122042400|sp|Q4DNU7|Q4DNU7_TRYCR	gnl|CDD|306532	28,99	69	46	2	1018	1086	1	66	0,000003	48,8	pfam00035	dsrm
gi|122042950|sp|Q4DQS9|Q4DQS9_TRYCR	gnl|CDD|318193	22,76	769	507	22	14	741	78	800	9e-20	95,6	pfam15921	CCDC158
gi|122042950|sp|Q4DQS9|Q4DQS9_TRYCR	gnl|CDD|318193	23,7	675	424	21	115	734	74	712	3e-16	84,4	pfam15921	CCDC158
gi|122042950|sp|Q4DQS9|Q4DQS9_TRYCR	gnl|CDD|318193	22,22	594	378	14	3	534	270	841	2e-13	75,2	pfam15921	CCDC158
gi|122042950|sp|Q4DQS9|Q4DQS9_TRYCR	gnl|CDD|318193	22,01	527	358	14	2	507	355	849	6e-12	70,1	pfam15921	CCDC158
gi|122042950|sp|Q4DQS9|Q4DQS9_TRYCR	gnl|CDD|318193	24,01	354	232	9	395	739	74	399	0,00000008	56,7	pfam15921	CCDC158
gi|122042950|sp|Q4DQS9|Q4DQS9_TRYCR	gnl|CDD|314924	20,27	745	490	17	56	732	254	962	1e-17	89,4	pfam12128	DUF3584
gi|122042950|sp|Q4DQS9|Q4DQS9_TRYCR	gnl|CDD|314924	19,79	748	494	19	11	675	237	961	9e-15	79,4	pfam12128	DUF3584
gi|122042950|sp|Q4DQS9|Q4DQS9_TRYCR	gnl|CDD|314924	21,08	669	462	14	3	640	328	961	8e-13	73,2	pfam12128	DUF3584
gi|122042950|sp|Q4DQS9|Q4DQS9_TRYCR	gnl|CDD|314924	20,62	485	352	8	263	739	216	675	0,00000002	58,9	pfam12128	DUF3584
gi|122042950|sp|Q4DQS9|Q4DQS9_TRYCR	gnl|CDD|314924	20,94	339	248	7	374	698	199	531	0,00000003	58,6	pfam12128	DUF3584
gi|122042950|sp|Q4DQS9|Q4DQS9_TRYCR	gnl|CDD|314924	21,09	512	374	12	234	732	199	693	0,00000003	58,2	pfam12128	DUF3584
gi|122042950|sp|Q4DQS9|Q4DQS9_TRYCR	gnl|CDD|314924	21,76	363	264	7	2	354	603	955	0,00000009	56,6	pfam12128	DUF3584
gi|122042950|sp|Q4DQS9|Q4DQS9_TRYCR	gnl|CDD|314924	20,99	424	302	8	336	751	254	652	0,0000001	55,9	pfam12128	DUF3584
gi|122042950|sp|Q4DQS9|Q4DQS9_TRYCR	gnl|CDD|307627	25,21	710	498	7	28	708	2	707	3e-17	87,5	pfam01576	Myosin_tail_1
gi|122042950|sp|Q4DQS9|Q4DQS9_TRYCR	gnl|CDD|307627	25,24	717	481	11	63	739	2	703	7e-17	86,4	pfam01576	Myosin_tail_1
gi|122042950|sp|Q4DQS9|Q4DQS9_TRYCR	gnl|CDD|307627	25,39	760	523	10	12	734	10	762	9e-17	86	pfam01576	Myosin_tail_1
gi|122042950|sp|Q4DQS9|Q4DQS9_TRYCR	gnl|CDD|307627	24,46	744	514	11	5	730	213	926	2e-13	75,2	pfam01576	Myosin_tail_1
gi|122042950|sp|Q4DQS9|Q4DQS9_TRYCR	gnl|CDD|307627	25,25	606	415	8	168	745	2	597	3e-13	74,4	pfam01576	Myosin_tail_1
gi|122042950|sp|Q4DQS9|Q4DQS9_TRYCR	gnl|CDD|307627	23,33	750	536	8	4	734	349	1078	3e-13	74,4	pfam01576	Myosin_tail_1
gi|122042950|sp|Q4DQS9|Q4DQS9_TRYCR	gnl|CDD|307627	25,59	465	328	4	308	754	2	466	0,0000001	56,3	pfam01576	Myosin_tail_1
gi|122042950|sp|Q4DQS9|Q4DQS9_TRYCR	gnl|CDD|310310	24,66	515	348	11	55	547	157	653	6e-16	82,8	pfam05622	HOOK
gi|122042950|sp|Q4DQS9|Q4DQS9_TRYCR	gnl|CDD|310310	24,04	495	338	12	4	477	176	653	2e-14	77,8	pfam05622	HOOK
gi|122042950|sp|Q4DQS9|Q4DQS9_TRYCR	gnl|CDD|310310	24,74	473	280	14	265	700	157	590	2e-13	74,7	pfam05622	HOOK
gi|122042950|sp|Q4DQS9|Q4DQS9_TRYCR	gnl|CDD|310310	24,14	464	294	10	300	735	157	590	1e-11	69,3	pfam05622	HOOK
gi|122042950|sp|Q4DQS9|Q4DQS9_TRYCR	gnl|CDD|310310	25	412	267	8	335	740	157	532	0,000000005	60,5	pfam05622	HOOK
gi|122042950|sp|Q4DQS9|Q4DQS9_TRYCR	gnl|CDD|114219	21,06	698	513	10	3	683	109	785	1e-15	82,1	pfam05483	SCP-1
gi|122042950|sp|Q4DQS9|Q4DQS9_TRYCR	gnl|CDD|114219	22,03	681	503	11	61	736	97	754	1e-14	78,6	pfam05483	SCP-1
gi|122042950|sp|Q4DQS9|Q4DQS9_TRYCR	gnl|CDD|114219	22,97	579	420	9	166	739	97	654	3e-12	70,9	pfam05483	SCP-1
gi|122042950|sp|Q4DQS9|Q4DQS9_TRYCR	gnl|CDD|114219	22,48	476	353	6	271	741	97	561	8e-10	63,2	pfam05483	SCP-1
gi|122042950|sp|Q4DQS9|Q4DQS9_TRYCR	gnl|CDD|114219	20,8	524	381	8	1	508	280	785	0,00000004	57,8	pfam05483	SCP-1
gi|122042950|sp|Q4DQS9|Q4DQS9_TRYCR	gnl|CDD|114219	21,18	510	385	6	236	743	97	591	0,00000009	56,3	pfam05483	SCP-1
gi|122042950|sp|Q4DQS9|Q4DQS9_TRYCR	gnl|CDD|114219	22,68	410	301	6	341	745	97	495	0,000005	50,9	pfam05483	SCP-1
gi|122042950|sp|Q4DQS9|Q4DQS9_TRYCR	gnl|CDD|310273	20,55	579	404	9	86	614	4	576	2e-15	81,3	pfam05557	MAD
gi|122042950|sp|Q4DQS9|Q4DQS9_TRYCR	gnl|CDD|310273	21,08	574	398	13	191	732	4	554	1e-13	75,6	pfam05557	MAD
gi|122042950|sp|Q4DQS9|Q4DQS9_TRYCR	gnl|CDD|310273	21,24	579	400	11	16	544	4	576	1e-13	75,6	pfam05557	MAD
gi|122042950|sp|Q4DQS9|Q4DQS9_TRYCR	gnl|CDD|310273	19,29	337	235	5	436	739	4	336	0,0000006	53,6	pfam05557	MAD
gi|122042950|sp|Q4DQS9|Q4DQS9_TRYCR	gnl|CDD|311715	25,07	355	240	5	4	346	119	459	4e-13	73,3	pfam07888	CALCOCO1
gi|122042950|sp|Q4DQS9|Q4DQS9_TRYCR	gnl|CDD|311715	26,22	370	237	7	343	696	110	459	5e-13	73	pfam07888	CALCOCO1
gi|122042950|sp|Q4DQS9|Q4DQS9_TRYCR	gnl|CDD|311715	25,14	366	246	6	273	626	110	459	1e-12	72,2	pfam07888	CALCOCO1
gi|122042950|sp|Q4DQS9|Q4DQS9_TRYCR	gnl|CDD|311715	24,24	363	250	4	98	460	110	447	3e-12	70,6	pfam07888	CALCOCO1
gi|122042950|sp|Q4DQS9|Q4DQS9_TRYCR	gnl|CDD|311715	25,8	314	203	4	442	739	137	436	8e-12	69,1	pfam07888	CALCOCO1
gi|122042950|sp|Q4DQS9|Q4DQS9_TRYCR	gnl|CDD|311715	25,41	362	245	5	378	739	110	446	7e-11	66	pfam07888	CALCOCO1
gi|122042950|sp|Q4DQS9|Q4DQS9_TRYCR	gnl|CDD|311715	24,72	352	242	3	214	565	119	447	9e-11	65,6	pfam07888	CALCOCO1
gi|122042950|sp|Q4DQS9|Q4DQS9_TRYCR	gnl|CDD|311715	24,5	249	178	2	494	742	119	357	0,00000001	59,1	pfam07888	CALCOCO1
gi|122042950|sp|Q4DQS9|Q4DQS9_TRYCR	gnl|CDD|311715	23,73	295	202	4	1	276	169	459	0,00000009	56	pfam07888	CALCOCO1
gi|122042950|sp|Q4DQS9|Q4DQS9_TRYCR	gnl|CDD|311715	24,84	318	215	7	3	311	157	459	0,00000009	56	pfam07888	CALCOCO1
gi|122042950|sp|Q4DQS9|Q4DQS9_TRYCR	gnl|CDD|308206	16,78	739	595	5	3	739	174	894	2e-11	68,8	pfam02463	SMC_N
gi|122042950|sp|Q4DQS9|Q4DQS9_TRYCR	gnl|CDD|308206	15,77	672	561	2	66	736	167	834	9e-11	66,5	pfam02463	SMC_N
gi|122042950|sp|Q4DQS9|Q4DQS9_TRYCR	gnl|CDD|308206	16,35	636	512	2	124	739	148	783	0,00000004	57,7	pfam02463	SMC_N
gi|122042950|sp|Q4DQS9|Q4DQS9_TRYCR	gnl|CDD|310534	19,47	226	175	2	16	236	14	237	0,000000002	59,7	pfam06008	Laminin_I
gi|122042950|sp|Q4DQS9|Q4DQS9_TRYCR	gnl|CDD|310534	21,05	228	169	3	331	551	14	237	0,000000005	58,6	pfam06008	Laminin_I
gi|122042950|sp|Q4DQS9|Q4DQS9_TRYCR	gnl|CDD|310534	21,68	226	170	3	156	376	14	237	0,00000001	57,4	pfam06008	Laminin_I
gi|122042950|sp|Q4DQS9|Q4DQS9_TRYCR	gnl|CDD|310534	19,47	226	175	2	51	271	14	237	0,00000002	56,7	pfam06008	Laminin_I
gi|122042950|sp|Q4DQS9|Q4DQS9_TRYCR	gnl|CDD|310534	20,8	226	172	3	436	656	14	237	0,00000003	56,3	pfam06008	Laminin_I
gi|122042950|sp|Q4DQS9|Q4DQS9_TRYCR	gnl|CDD|310534	20,35	226	173	2	296	516	14	237	0,0000004	52,8	pfam06008	Laminin_I
gi|122042950|sp|Q4DQS9|Q4DQS9_TRYCR	gnl|CDD|310534	19,8	197	151	2	10	201	43	237	0,0000009	51,6	pfam06008	Laminin_I
gi|122042950|sp|Q4DQS9|Q4DQS9_TRYCR	gnl|CDD|310534	20,8	226	172	3	506	726	14	237	0,000007	48,9	pfam06008	Laminin_I
gi|122042950|sp|Q4DQS9|Q4DQS9_TRYCR	gnl|CDD|293683	21,3	230	161	4	24	250	6	218	0,0000003	52,8	pfam17078	SHE3
gi|122042950|sp|Q4DQS9|Q4DQS9_TRYCR	gnl|CDD|293683	21,43	238	167	4	164	398	6	226	0,000003	49,7	pfam17078	SHE3
gi|122042950|sp|Q4DQS9|Q4DQS9_TRYCR	gnl|CDD|293683	23,24	185	126	2	339	523	6	174	0,000003	49,7	pfam17078	SHE3
gi|122042950|sp|Q4DQS9|Q4DQS9_TRYCR	gnl|CDD|293683	20,35	226	160	4	1	223	18	226	0,0002	44,3	pfam17078	SHE3
gi|122042950|sp|Q4DQS9|Q4DQS9_TRYCR	gnl|CDD|293683	21,52	237	168	6	304	538	6	226	0,0002	44,3	pfam17078	SHE3
gi|122042950|sp|Q4DQS9|Q4DQS9_TRYCR	gnl|CDD|293683	23,87	155	108	1	479	633	6	150	0,0002	44	pfam17078	SHE3
gi|122042950|sp|Q4DQS9|Q4DQS9_TRYCR	gnl|CDD|293683	23,23	155	109	1	584	738	6	150	0,0003	43,6	pfam17078	SHE3
gi|122042950|sp|Q4DQS9|Q4DQS9_TRYCR	gnl|CDD|293683	20,68	237	170	4	129	363	6	226	0,0004	43,2	pfam17078	SHE3
gi|122042950|sp|Q4DQS9|Q4DQS9_TRYCR	gnl|CDD|284517	22,65	627	445	12	14	605	56	677	0,0000004	54,4	pfam07111	HCR
gi|122042950|sp|Q4DQS9|Q4DQS9_TRYCR	gnl|CDD|284517	23,34	617	439	12	84	684	56	654	0,00005	47,4	pfam07111	HCR
gi|122042950|sp|Q4DQS9|Q4DQS9_TRYCR	gnl|CDD|311978	27,97	143	100	1	409	551	143	282	0,0000006	52,6	pfam08317	Spc7
gi|122042950|sp|Q4DQS9|Q4DQS9_TRYCR	gnl|CDD|311978	28,67	143	99	2	129	271	143	282	0,000002	51,1	pfam08317	Spc7
gi|122042950|sp|Q4DQS9|Q4DQS9_TRYCR	gnl|CDD|311978	27,27	143	101	1	59	201	143	282	0,000008	49,2	pfam08317	Spc7
gi|122042950|sp|Q4DQS9|Q4DQS9_TRYCR	gnl|CDD|311978	27,27	143	101	1	234	376	143	282	0,00002	48	pfam08317	Spc7
gi|122042950|sp|Q4DQS9|Q4DQS9_TRYCR	gnl|CDD|311978	32,59	135	74	1	339	473	143	260	0,0002	44,5	pfam08317	Spc7
gi|122042950|sp|Q4DQS9|Q4DQS9_TRYCR	gnl|CDD|311978	35,29	136	69	3	304	438	143	260	0,0003	44,5	pfam08317	Spc7
gi|122042950|sp|Q4DQS9|Q4DQS9_TRYCR	gnl|CDD|311978	26,57	143	102	1	514	656	143	282	0,0003	44,1	pfam08317	Spc7
gi|122042950|sp|Q4DQS9|Q4DQS9_TRYCR	gnl|CDD|311978	34,56	136	70	3	584	718	143	260	0,0003	44,1	pfam08317	Spc7
gi|122042950|sp|Q4DQS9|Q4DQS9_TRYCR	gnl|CDD|311978	38,1	126	69	3	143	263	139	260	0,0004	43,8	pfam08317	Spc7
gi|122042950|sp|Q4DQS9|Q4DQS9_TRYCR	gnl|CDD|311978	38,89	108	61	2	17	123	157	260	0,0005	43,4	pfam08317	Spc7
gi|122042950|sp|Q4DQS9|Q4DQS9_TRYCR	gnl|CDD|311978	34,56	136	70	3	444	578	143	260	0,0005	43,4	pfam08317	Spc7
gi|122042950|sp|Q4DQS9|Q4DQS9_TRYCR	gnl|CDD|311978	28,45	116	80	2	16	131	170	282	0,001	42,6	pfam08317	Spc7
gi|122042950|sp|Q4DQS9|Q4DQS9_TRYCR	gnl|CDD|313412	20,97	725	528	11	27	736	1	695	0,0000007	53,4	pfam10174	Cast
gi|122042950|sp|Q4DQS9|Q4DQS9_TRYCR	gnl|CDD|310341	25,52	286	177	10	2	277	218	477	0,000002	51,6	pfam05667	DUF812
gi|122042950|sp|Q4DQS9|Q4DQS9_TRYCR	gnl|CDD|310341	26,96	293	164	11	352	627	218	477	0,000003	51,6	pfam05667	DUF812
gi|122042950|sp|Q4DQS9|Q4DQS9_TRYCR	gnl|CDD|310341	25,85	294	181	11	100	382	210	477	0,000007	50	pfam05667	DUF812
gi|122042950|sp|Q4DQS9|Q4DQS9_TRYCR	gnl|CDD|310341	25,17	290	188	9	450	732	210	477	0,00002	48,5	pfam05667	DUF812
gi|122042950|sp|Q4DQS9|Q4DQS9_TRYCR	gnl|CDD|310341	24,14	319	199	9	170	484	210	489	0,00002	48,5	pfam05667	DUF812
gi|122042950|sp|Q4DQS9|Q4DQS9_TRYCR	gnl|CDD|316391	24,86	358	242	7	236	592	1	332	0,000004	50,3	pfam13868	TPH
gi|122042950|sp|Q4DQS9|Q4DQS9_TRYCR	gnl|CDD|316391	23,26	331	229	4	411	741	1	306	0,00004	47,2	pfam13868	TPH
gi|122042950|sp|Q4DQS9|Q4DQS9_TRYCR	gnl|CDD|316391	21,31	352	257	6	306	652	1	337	0,0002	45,3	pfam13868	TPH
gi|122042950|sp|Q4DQS9|Q4DQS9_TRYCR	gnl|CDD|316391	21,7	364	251	4	376	739	1	330	0,0004	44,1	pfam13868	TPH
gi|122042950|sp|Q4DQS9|Q4DQS9_TRYCR	gnl|CDD|316391	22,91	371	240	8	26	385	1	336	0,0004	44,1	pfam13868	TPH
gi|122042950|sp|Q4DQS9|Q4DQS9_TRYCR	gnl|CDD|316391	25,17	286	192	5	1	277	60	332	0,001	42,6	pfam13868	TPH
gi|122042950|sp|Q4DQS9|Q4DQS9_TRYCR	gnl|CDD|317725	25,82	368	251	8	224	583	137	490	0,00002	48,9	pfam15358	TSKS
gi|122042950|sp|Q4DQS9|Q4DQS9_TRYCR	gnl|CDD|317725	24,26	338	244	5	399	733	137	465	0,00008	46,5	pfam15358	TSKS
gi|122042950|sp|Q4DQS9|Q4DQS9_TRYCR	gnl|CDD|317725	25,12	414	285	9	49	456	137	531	0,0001	46,2	pfam15358	TSKS
gi|122042950|sp|Q4DQS9|Q4DQS9_TRYCR	gnl|CDD|310624	21,73	451	270	16	73	489	48	449	0,00003	47,9	pfam06160	EzrA
gi|122042950|sp|Q4DQS9|Q4DQS9_TRYCR	gnl|CDD|310624	21,48	405	266	11	237	629	85	449	0,00003	47,9	pfam06160	EzrA
gi|122042950|sp|Q4DQS9|Q4DQS9_TRYCR	gnl|CDD|310624	20,58	413	262	12	4	383	97	476	0,00008	46,7	pfam06160	EzrA
gi|122042950|sp|Q4DQS9|Q4DQS9_TRYCR	gnl|CDD|310624	20,74	434	271	13	307	735	85	450	0,0003	44,8	pfam06160	EzrA
gi|122042950|sp|Q4DQS9|Q4DQS9_TRYCR	gnl|CDD|306535	26,74	273	173	7	376	638	23	278	0,00004	46,8	pfam00038	Filament
gi|122042950|sp|Q4DQS9|Q4DQS9_TRYCR	gnl|CDD|306535	27,08	277	175	7	417	683	29	288	0,00006	46,4	pfam00038	Filament
gi|122042950|sp|Q4DQS9|Q4DQS9_TRYCR	gnl|CDD|306535	25,7	284	184	6	166	439	23	289	0,0006	43,4	pfam00038	Filament
gi|122042950|sp|Q4DQS9|Q4DQS9_TRYCR	gnl|CDD|313026	21,86	462	329	10	51	501	22	462	0,00005	47,1	pfam09730	BicD
gi|122042950|sp|Q4DQS9|Q4DQS9_TRYCR	gnl|CDD|318177	24,14	261	173	5	238	498	96	331	0,0001	45,6	pfam15905	HMMR_N
gi|122042950|sp|Q4DQS9|Q4DQS9_TRYCR	gnl|CDD|318177	23,42	269	181	4	471	739	84	327	0,0001	45,2	pfam15905	HMMR_N
gi|122042950|sp|Q4DQS9|Q4DQS9_TRYCR	gnl|CDD|318177	23,75	261	174	5	343	603	96	331	0,0002	44,8	pfam15905	HMMR_N
gi|122042950|sp|Q4DQS9|Q4DQS9_TRYCR	gnl|CDD|318177	25,27	273	175	6	16	288	88	331	0,0004	44,1	pfam15905	HMMR_N
gi|122042950|sp|Q4DQS9|Q4DQS9_TRYCR	gnl|CDD|309330	29,27	123	85	1	411	531	62	184	0,0001	44	pfam04156	IncA
gi|122042950|sp|Q4DQS9|Q4DQS9_TRYCR	gnl|CDD|317107	27,32	194	130	3	232	425	2	184	0,0003	43,2	pfam14662	KASH_CCD
gi|122042950|sp|Q4DQS9|Q4DQS9_TRYCR	gnl|CDD|317107	28,93	197	122	4	302	498	2	180	0,0003	43,2	pfam14662	KASH_CCD
gi|122042950|sp|Q4DQS9|Q4DQS9_TRYCR	gnl|CDD|317107	32,18	174	101	4	297	460	18	184	0,0003	43,2	pfam14662	KASH_CCD
gi|122042950|sp|Q4DQS9|Q4DQS9_TRYCR	gnl|CDD|317485	25,13	386	237	8	86	451	38	391	0,0003	44,6	pfam15070	GOLGA2L5
gi|122042950|sp|Q4DQS9|Q4DQS9_TRYCR	gnl|CDD|313024	23,21	280	174	7	127	391	40	293	0,0004	43,8	pfam09728	Taxilin
gi|122042950|sp|Q4DQS9|Q4DQS9_TRYCR	gnl|CDD|309185	32,61	92	56	3	436	526	63	149	0,001	41,4	pfam03962	Mnd1
gi|122043239|sp|Q4DRV2|Q4DRV2_TRYCR	gnl|CDD|316387	38,14	97	59	1	168	264	1	96	2e-24	95,3	pfam13864	Enkurin
gi|122043269|sp|Q4DRY8|Q4DRY8_TRYCR	gnl|CDD|254864	23,17	246	156	11	6	228	12	247	3e-12	65,9	pfam08538	DUF1749
gi|122043281|sp|Q4DS02|Q4DS02_TRYCR	gnl|CDD|317352	29,87	77	36	5	191	261	10	74	0,0004	39,6	pfam14927	Neurensin
gi|122043503|sp|Q4DSS0|Q4DSS0_TRYCR	gnl|CDD|315554	21,84	87	62	3	419	502	8	91	0,00005	44,2	pfam12894	ANAPC4_WD40
gi|122043503|sp|Q4DSS0|Q4DSS0_TRYCR	gnl|CDD|306830	41,67	36	20	1	621	656	5	39	0,00006	43,5	pfam00400	WD40
gi|122044497|sp|Q4DW59|Q4DW59_TRYCR	gnl|CDD|306939	27,06	170	113	4	263	421	12	181	2e-14	72,7	pfam00566	RabGAP-TBC
gi|122044895|sp|Q4DXJ7|Q4DXJ7_TRYCR	gnl|CDD|311351	47,12	416	193	8	14	415	1	403	0	573	pfam07350	DUF1479
gi|122045239|sp|Q4DYR0|Q4DYR0_TRYCR	gnl|CDD|309003	32,86	70	39	3	221	287	6	70	0,00000002	51,9	pfam03719	Ribosomal_S5_C
gi|122045383|sp|Q4DZ79|Q4DZ79_TRYCR	gnl|CDD|306996	35,17	145	87	3	144	281	8	152	6e-25	98,9	pfam00650	CRAL_TRIO
gi|122045509|sp|Q4DZP1|Q4DZP1_TRYCR	gnl|CDD|314096	56,7	97	42	0	164	260	1	97	1e-50	164	pfam11069	DUF2870
gi|122045579|sp|Q4DZX3|Q4DZX3_TRYCR	gnl|CDD|281392	24,76	105	58	4	68	170	3	88	0,000005	47,8	pfam03388	Lectin_leg-like
gi|122045902|sp|Q4E124|Q4E124_TRYCR	gnl|CDD|306642	25	60	42	2	9	67	4	61	0,000000004	49,9	pfam00173	Cyt-b5
gi|122046332|sp|Q4E2I4|Q4E2I4_TRYCR	gnl|CDD|315070	29,34	351	220	4	261	583	2	352	8e-54	189	pfam12309	KBP_C
gi|122046762|sp|Q4E410|Q4E410_TRYCR	gnl|CDD|317622	26,8	291	178	10	2	276	7	278	5e-24	99,4	pfam15239	DUF4586
gi|122047106|sp|Q4E589|Q4E589_TRYCR	gnl|CDD|307281	25	244	158	9	65	306	2	222	3e-26	105	pfam01063	Aminotran_4
gi|122047174|sp|Q4E5H5|Q4E5H5_TRYCR	gnl|CDD|307495	45,16	62	31	1	490	548	3	64	8e-20	85,1	pfam01363	FYVE
gi|122080503|sp|Q4CXD0|Q4CXD0_TRYCR	gnl|CDD|315812	24,63	134	97	3	106	237	1	132	2e-14	69,4	pfam13229	Beta_helix
gi|122080503|sp|Q4CXD0|Q4CXD0_TRYCR	gnl|CDD|315812	23,87	155	111	6	65	214	5	157	9e-11	59	pfam13229	Beta_helix
gi|122080503|sp|Q4CXD0|Q4CXD0_TRYCR	gnl|CDD|315812	26,97	89	63	2	154	240	1	89	0,0001	41,2	pfam13229	Beta_helix
gi|122080503|sp|Q4CXD0|Q4CXD0_TRYCR	gnl|CDD|309961	24,32	111	65	4	131	236	34	130	0,0005	40,4	pfam05048	NosD
gi|122080503|sp|Q4CXD0|Q4CXD0_TRYCR	gnl|CDD|309961	22,58	93	67	3	130	218	7	98	0,001	39,3	pfam05048	NosD
gi|122080848|sp|Q4D7Q2|Q4D7Q2_TRYCR	gnl|CDD|255872	59,46	185	71	3	134	316	1	183	3e-105	309	pfam10274	ParcG
gi|122113510|sp|Q4DUG1|Q4DUG1_TRYCR	gnl|CDD|315818	25,71	210	114	11	95	264	1	208	2e-16	83	pfam13236	CLU
gi|122113510|sp|Q4DUG1|Q4DUG1_TRYCR	gnl|CDD|308206	14,12	673	495	14	3064	3670	335	990	0,000008	51,9	pfam02463	SMC_N
gi|122113510|sp|Q4DUG1|Q4DUG1_TRYCR	gnl|CDD|308892	24,08	299	153	13	3429	3670	30	311	0,0003	46,7	pfam03528	Rabaptin
gi|122113521|sp|Q4DV70|Q4DV70_TRYCR	gnl|CDD|278513	30,61	98	61	3	43	140	2	92	4e-12	59,9	pfam00085	Thioredoxin
gi|122124876|sp|Q4CVE1|Q4CVE1_TRYCR	gnl|CDD|318193	21,3	859	553	24	660	1430	90	913	5e-15	81,7	pfam15921	CCDC158
gi|122124876|sp|Q4CVE1|Q4CVE1_TRYCR	gnl|CDD|318193	20,69	749	455	21	1253	1916	123	817	0,000000003	62,4	pfam15921	CCDC158
gi|122124876|sp|Q4CVE1|Q4CVE1_TRYCR	gnl|CDD|318193	20,1	413	277	8	1623	1987	291	698	0,00006	48,2	pfam15921	CCDC158
gi|122124876|sp|Q4CVE1|Q4CVE1_TRYCR	gnl|CDD|318193	22,29	507	352	13	568	1041	341	838	0,00009	47,8	pfam15921	CCDC158
gi|122124876|sp|Q4CVE1|Q4CVE1_TRYCR	gnl|CDD|308206	13,91	719	572	13	765	1466	198	886	3e-10	66,1	pfam02463	SMC_N
gi|122124876|sp|Q4CVE1|Q4CVE1_TRYCR	gnl|CDD|308206	14,2	838	644	11	823	1622	170	970	0,0000005	55	pfam02463	SMC_N
gi|122124876|sp|Q4CVE1|Q4CVE1_TRYCR	gnl|CDD|314924	17,87	733	475	21	1249	1979	240	847	0,000000002	63,2	pfam12128	DUF3584
gi|122124876|sp|Q4CVE1|Q4CVE1_TRYCR	gnl|CDD|314924	16,78	757	529	16	998	1743	221	887	0,0000002	56,3	pfam12128	DUF3584
gi|122124876|sp|Q4CVE1|Q4CVE1_TRYCR	gnl|CDD|314924	19,63	749	500	22	748	1457	252	937	0,000005	51,6	pfam12128	DUF3584
gi|122124876|sp|Q4CVE1|Q4CVE1_TRYCR	gnl|CDD|318177	23,05	321	209	9	1638	1941	30	329	0,000002	52,2	pfam15905	HMMR_N
gi|122124876|sp|Q4CVE1|Q4CVE1_TRYCR	gnl|CDD|311715	22,22	306	211	6	1673	1976	150	430	0,00002	49,8	pfam07888	CALCOCO1
gi|122124876|sp|Q4CVE1|Q4CVE1_TRYCR	gnl|CDD|311715	25,24	210	143	5	1778	1980	137	339	0,00005	48,3	pfam07888	CALCOCO1
gi|122124876|sp|Q4CVE1|Q4CVE1_TRYCR	gnl|CDD|311715	25,81	217	127	6	766	950	174	388	0,0006	44,8	pfam07888	CALCOCO1
gi|122124876|sp|Q4CVE1|Q4CVE1_TRYCR	gnl|CDD|311715	21,94	237	174	3	1490	1719	168	400	0,0008	44,5	pfam07888	CALCOCO1
gi|122124876|sp|Q4CVE1|Q4CVE1_TRYCR	gnl|CDD|114219	20,27	375	257	8	768	1138	295	631	0,00002	49,7	pfam05483	SCP-1
gi|122124876|sp|Q4CVE1|Q4CVE1_TRYCR	gnl|CDD|114219	20,86	441	282	13	1528	1927	359	773	0,00008	47,8	pfam05483	SCP-1
gi|122124876|sp|Q4CVE1|Q4CVE1_TRYCR	gnl|CDD|114219	18,58	619	452	15	762	1362	196	780	0,0001	47,4	pfam05483	SCP-1
gi|122124876|sp|Q4CVE1|Q4CVE1_TRYCR	gnl|CDD|310310	23,28	408	226	18	1627	1988	158	524	0,00004	48,9	pfam05622	HOOK
gi|122124876|sp|Q4CVE1|Q4CVE1_TRYCR	gnl|CDD|307627	21,23	1206	756	29	748	1890	7	1081	0,00005	48,6	pfam01576	Myosin_tail_1
gi|122124876|sp|Q4CVE1|Q4CVE1_TRYCR	gnl|CDD|307627	23,22	857	513	29	1203	1997	214	987	0,0002	46,7	pfam01576	Myosin_tail_1
gi|122124876|sp|Q4CVE1|Q4CVE1_TRYCR	gnl|CDD|307627	21,88	850	535	20	1197	1985	81	862	0,001	44,4	pfam01576	Myosin_tail_1
gi|122124876|sp|Q4CVE1|Q4CVE1_TRYCR	gnl|CDD|282014	22,62	389	235	10	1583	1950	426	769	0,0004	45,6	pfam04094	DUF390
gi|122015797|sp|Q4CT56|Q4CT56_TRYCR	gnl|CDD|309295	24,35	115	81	1	741	849	16	130	0,0000007	53	pfam04111	APG6
gi|122015797|sp|Q4CT56|Q4CT56_TRYCR	gnl|CDD|309295	23,81	126	83	2	1595	1714	16	134	0,000002	51,8	pfam04111	APG6
gi|122015797|sp|Q4CT56|Q4CT56_TRYCR	gnl|CDD|309295	27,64	123	81	2	685	807	16	130	0,000003	51	pfam04111	APG6
gi|122015797|sp|Q4CT56|Q4CT56_TRYCR	gnl|CDD|309295	25,22	115	80	1	1427	1535	16	130	0,000006	50,3	pfam04111	APG6
gi|122015797|sp|Q4CT56|Q4CT56_TRYCR	gnl|CDD|309295	23,48	115	82	1	559	667	16	130	0,00001	49,1	pfam04111	APG6
gi|122015797|sp|Q4CT56|Q4CT56_TRYCR	gnl|CDD|309295	27,83	115	77	1	881	989	16	130	0,00002	48,7	pfam04111	APG6
gi|122015797|sp|Q4CT56|Q4CT56_TRYCR	gnl|CDD|309295	25,2	123	84	2	755	877	16	130	0,00002	48,3	pfam04111	APG6
gi|122015797|sp|Q4CT56|Q4CT56_TRYCR	gnl|CDD|309295	26,09	115	79	1	1315	1423	16	130	0,00003	47,9	pfam04111	APG6
gi|122015797|sp|Q4CT56|Q4CT56_TRYCR	gnl|CDD|309295	28,46	123	80	1	601	723	16	130	0,00004	47,6	pfam04111	APG6
gi|122015797|sp|Q4CT56|Q4CT56_TRYCR	gnl|CDD|309295	26,09	115	79	1	587	695	16	130	0,00005	47,2	pfam04111	APG6
gi|122015797|sp|Q4CT56|Q4CT56_TRYCR	gnl|CDD|309295	27,27	110	74	1	1012	1115	21	130	0,00006	47,2	pfam04111	APG6
gi|122015797|sp|Q4CT56|Q4CT56_TRYCR	gnl|CDD|309295	25,4	126	81	2	1539	1658	16	134	0,00008	46,4	pfam04111	APG6
gi|122015797|sp|Q4CT56|Q4CT56_TRYCR	gnl|CDD|309295	26,96	115	78	1	783	891	16	130	0,00009	46,4	pfam04111	APG6
gi|122015797|sp|Q4CT56|Q4CT56_TRYCR	gnl|CDD|309295	27,35	117	78	2	355	471	21	130	0,0001	46	pfam04111	APG6
gi|122015797|sp|Q4CT56|Q4CT56_TRYCR	gnl|CDD|309295	26,09	115	79	1	909	1017	16	130	0,0001	46	pfam04111	APG6
gi|122015797|sp|Q4CT56|Q4CT56_TRYCR	gnl|CDD|309295	25,74	101	69	1	1707	1801	16	116	0,0001	45,6	pfam04111	APG6
gi|122015797|sp|Q4CT56|Q4CT56_TRYCR	gnl|CDD|309295	26,09	115	79	1	797	905	16	130	0,0002	45,6	pfam04111	APG6
gi|122015797|sp|Q4CT56|Q4CT56_TRYCR	gnl|CDD|309295	26,83	123	82	2	1343	1465	16	130	0,0003	44,9	pfam04111	APG6
gi|122015797|sp|Q4CT56|Q4CT56_TRYCR	gnl|CDD|309295	22,95	122	88	1	857	972	13	134	0,0003	44,9	pfam04111	APG6
gi|122015797|sp|Q4CT56|Q4CT56_TRYCR	gnl|CDD|309295	27,83	115	77	1	1469	1577	16	130	0,0004	44,5	pfam04111	APG6
gi|122015797|sp|Q4CT56|Q4CT56_TRYCR	gnl|CDD|309295	22,48	129	80	3	1105	1227	16	130	0,0005	44,1	pfam04111	APG6
gi|122015797|sp|Q4CT56|Q4CT56_TRYCR	gnl|CDD|309295	23,29	146	90	4	967	1112	11	134	0,0007	43,7	pfam04111	APG6
gi|122015797|sp|Q4CT56|Q4CT56_TRYCR	gnl|CDD|309295	27,72	101	67	1	1203	1297	16	116	0,0007	43,7	pfam04111	APG6
gi|122042950|sp|Q4DQS9|Q4DQS9_TRYCR	gnl|CDD|309295	30,89	123	84	1	129	251	12	133	0,00000006	56	pfam04111	APG6
gi|122042950|sp|Q4DQS9|Q4DQS9_TRYCR	gnl|CDD|309295	31,17	154	77	5	374	527	12	136	0,0000002	54,1	pfam04111	APG6
gi|122042950|sp|Q4DQS9|Q4DQS9_TRYCR	gnl|CDD|309295	30,89	123	84	1	94	216	12	133	0,0000003	53,3	pfam04111	APG6
gi|122042950|sp|Q4DQS9|Q4DQS9_TRYCR	gnl|CDD|309295	30,89	123	84	1	24	146	12	133	0,0000006	52,6	pfam04111	APG6
gi|122042950|sp|Q4DQS9|Q4DQS9_TRYCR	gnl|CDD|309295	32,52	123	75	2	164	279	12	133	0,0000008	52,2	pfam04111	APG6
gi|122042950|sp|Q4DQS9|Q4DQS9_TRYCR	gnl|CDD|309295	29,14	151	78	3	584	734	12	133	0,000003	50,3	pfam04111	APG6
gi|122042950|sp|Q4DQS9|Q4DQS9_TRYCR	gnl|CDD|309295	29,87	154	79	3	304	457	12	136	0,000004	50,3	pfam04111	APG6
gi|122042950|sp|Q4DQS9|Q4DQS9_TRYCR	gnl|CDD|309295	30,52	154	78	5	514	667	12	136	0,000007	49,5	pfam04111	APG6
gi|122042950|sp|Q4DQS9|Q4DQS9_TRYCR	gnl|CDD|309295	29,87	154	79	5	339	492	12	136	0,000009	48,7	pfam04111	APG6
gi|122042950|sp|Q4DQS9|Q4DQS9_TRYCR	gnl|CDD|309295	29,87	154	79	5	479	632	12	136	0,00002	47,9	pfam04111	APG6
gi|122042950|sp|Q4DQS9|Q4DQS9_TRYCR	gnl|CDD|309295	28,57	154	81	3	234	387	12	136	0,00003	47,6	pfam04111	APG6
gi|122042950|sp|Q4DQS9|Q4DQS9_TRYCR	gnl|CDD|309295	30,52	154	78	5	444	597	12	136	0,00004	46,8	pfam04111	APG6
gi|122042950|sp|Q4DQS9|Q4DQS9_TRYCR	gnl|CDD|309295	29,87	154	79	5	549	702	12	136	0,00006	46,4	pfam04111	APG6
gi|122042950|sp|Q4DQS9|Q4DQS9_TRYCR	gnl|CDD|309295	30,77	104	72	0	8	111	30	133	0,0001	45,2	pfam04111	APG6
gi|122124876|sp|Q4CVE1|Q4CVE1_TRYCR	gnl|CDD|309295	24,11	141	95	3	1783	1923	9	137	0,00000008	56,4	pfam04111	APG6
gi|122015760|sp|Q4CT11|Q4CT11_TRYCR	gnl|CDD|309295	19,23	130	90	5	489	616	11	127	0,0006	42,9	pfam04111	APG6
