# Supplementary material for: Proteome-Wide Analysis of Trypanosoma cruzi Exponential and Stationary Growth Phases Reveals a Subcellular Compartment-Specific Regulation
Source: Genes (Basel). 2018 Aug 15;9(8):413. doi: 10.3390/genes9080413 (PMC6115888; doi:10.3390/genes9080413)
Supplement: Supplementary file 1 [file genes-09-00413-s001.zip › Supplementary Table 5.xlsx]

## Sheet: TableS3
Supplementary Table 5: N-terminal acetylated peptides
Sequence	First_residue	Modifications	Protein Groups	Proteins	Acetyl (Protein N-term)	Deamidation (NQ)	Oxidation (M)	Missed cleavages	Identification type stationary 1	Identification type stationary 2	Identification type exponential 1	Identification type exponential 2	Matching	Fraction Average	Fraction Std. Dev.	Fraction 1	Experiment stationary 1	Experiment stationary 2	Experiment sample44	Experiment sample45	Experiment exponential 1	Experiment exponential 2	Retention time	Calibrated retention time	Charges	PEP	MS/MS scan number	Raw file	Score	Delta score	Intensity	Intensity stationary 1	Intensity stationary 2	Intensity exponential 1	Intensity exponential 2	Reverse	Potential contaminant	id	Protein group IDs	Peptide ID	Evidence IDs	MS/MS IDs	Best MS/MS	Deamidation (NQ) site IDs	Oxidation (M) site IDs	MS/MS Count	Proteins	Name	LFQ intensity stationary 1
ATTLEEFSAK	A	Acetyl (Protein N-term)	1551	tr|Q4D7Y4|Q4D7Y4_TRYCC;tr|Q4D3A7|Q4D3A7_TRYCC;tr|Q4D3A5|Q4D3A5_TRYCC	1	0	0	0	By MS/MS	By MS/MS	By MS/MS	By MS/MS	1	1	0	31	6	5	6	5	4	5	69005	69385	1;2	0.0137	64719	sample46_2	143.4	102.28	39654000000	8111800000	8810400000	4433800000	8615500000			1471	1551	1405	14901;14902;14903;14904;14905;14906;14907;14908;14909;14910;14911;14912;14913;14914;14915;14916;14917;14918;14919;14920;14921;14922;14923;14924;14925;14926;14927;14928;14929;14930;14931	11805;11806;11807;11808;11809;11810;11811;11812;11813;11814;11815;11816;11817;11818;11819;11820;11821;11822;11823;11824;11825;11826;11827;11828;11829;11830;11831	11825			27	Q4D7Y4	>tr|Q4D7Y4|Q4D7Y4_TRYCC Kinetoplastid membrane protein KMP-11, putative OS=Trypanosoma cruzi (strain CL Brener) GN=Tc00.1047053510755.89 PE=4 SV=1;>tr|Q4D3A7|Q4D3A7_TRYCC Kinetoplastid membrane protein KMP-11 OS=Trypanosoma cruzi (strain CL Brener) GN=Tc00	17053000000
ATAAVERPTTAEER	A	Acetyl (Protein N-term)	1235;2524	tr|Q4D3F7|Q4D3F7_TRYCC;tr|Q4DNH8|Q4DNH8_TRYCC	1	0	0	1	By MS/MS	By matching	By MS/MS	By MS/MS	1	1	0	12	2	2	2	2	2	2	31969	32319	2	0.0005681	20854	sample42_1	83823	54356	30186000000	5677900000	3209100000	4697900000	7200500000			1375	1235;2524	1314	13884;13885;13886;13887;13888;13889;13890;13891;13892;13893;13894;13895	10976;10977;10978;10979;10980	10976			5	Q4D3F7	>tr|Q4D3F7|Q4D3F7_TRYCC Uncharacterized protein OS=Trypanosoma cruzi (strain CL Brener) GN=Tc00.1047053508719.70 PE=4 SV=1	6821800000
SYKPHHATVPTNPK	S	Acetyl (Protein N-term)	3488	tr|Q4E4L9|Q4E4L9_TRYCC	1	0	0	1	By MS/MS	By MS/MS	By MS/MS	By MS/MS	1	1	0	50	10	10	8	8	5	9	15724	15958	2;3;4	1.4e-32	7044	sample42_2	166.64	124.82	26470000000	4760200000	4346800000	2757000000	6859500000			13257	3488	12732	124937;124938;124939;124940;124941;124942;124943;124944;124945;124946;124947;124948;124949;124950;124951;124952;124953;124954;124955;124956;124957;124958;124959;124960;124961;124962;124963;124964;124965;124966;124967;124968;124969;124970;124971;124972;124973;124974;124975;124976;124977;124978;124979;124980;124981;124982;124983;124984;124985;124986	95070;95071;95072;95073;95074;95075;95076;95077;95078;95079;95080;95081;95082;95083;95084;95085;95086;95087;95088;95089;95090;95091;95092;95093;95094;95095;95096;95097;95098;95099;95100;95101;95102;95103;95104;95105;95106;95107;95108;95109;95110;95111;95112	95076			42	Q4E4L9	>tr|Q4E4L9|Q4E4L9_TRYCC Peptidyl-prolyl cis-trans isomerase OS=Trypanosoma cruzi (strain CL Brener) GN=Tc00.1047053506925.300 PE=3 SV=1	11451000000
ADQLSNEQISEFK	A	Acetyl (Protein N-term)	549	tr|Q4CSZ2|Q4CSZ2_TRYCC;tr|Q4D137|Q4D137_TRYCC;tr|Q4D2S5|Q4D2S5_TRYCC	1	0	0	0	By MS/MS	By MS/MS	By MS/MS	By MS/MS	1	1	0	14	3	2	3	2	2	2	74364	74682	2	3.49e-15	58673	sample46_1	175.6	155.48	7389000000	1645100000	1487500000	926450000	1334900000			284	549	272	3103;3104;3105;3106;3107;3108;3109;3110;3111;3112;3113;3114;3115;3116	2423;2424;2425;2426;2427;2428;2429;2430;2431;2432;2433;2434;2435;2436;2437;2438	2435			16	Q4CSZ2	>tr|Q4CSZ2|Q4CSZ2_TRYCC Calmodulin OS=Trypanosoma cruzi (strain CL Brener) GN=Tc00.1047053506391.10 PE=4 SV=1;>tr|Q4D137|Q4D137_TRYCC Calmodulin OS=Trypanosoma cruzi (strain CL Brener) GN=Tc00.1047053507483.50 PE=4 SV=1;>tr|Q4D139|Q4D139_TRYCC Calmodulin,	14011000000
MEIIDRPLSELIK	M	Acetyl (Protein N-term)	2805	tr|Q4E318|Q4E318_TRYCC;tr|Q4DT12|Q4DT12_TRYCC	1	0	0	1	By MS/MS	By MS/MS	By MS/MS	By MS/MS	1	1	0	12	2	2	2	2	2	2	104.75	104.76	2	5.8e-23	91008	sample44_2	166.62	132.18	9584900000	1295300000	2439400000	1027500000	2847600000			9862	2805	9482	94687;94688;94689;94690;94691;94692;94693;94694;94695;94696;94697;94698	72873;72874;72875;72876;72877;72878;72879;72880;72881;72882;72883;72884	72878			12	Q4E318	>tr|Q4E318|Q4E318_TRYCC Uncharacterized protein OS=Trypanosoma cruzi (strain CL Brener) GN=Tc00.1047053506435.150 PE=4 SV=1;>tr|Q4DT12|Q4DT12_TRYCC Uncharacterized protein OS=Trypanosoma cruzi (strain CL Brener) GN=Tc00.1047053506265.130 PE=4 SV=1	1392600000
METHAVSEK	M	Acetyl (Protein N-term)	270	tr|Q4CNF4|Q4CNF4_TRYCC	1	0	0	0	By MS/MS	By MS/MS	By MS/MS	By MS/MS	1	1	0	12	2	2	2	2	2	2	21891	22083	2	0.0928	13621	sample46_2	151.83	91895	8107700000	1253000000	1960000000	1100500000	3044300000			9895	270	9512	94965;94966;94967;94968;94969;94970;94971;94972;94973;94974;94975;94976	73078;73079;73080;73081;73082;73083;73084;73085;73086;73087;73088;73089;73090	73088			13	Q4CNF4	>tr|Q4CNF4|Q4CNF4_TRYCC 60S ribosomal protein L11, putative OS=Trypanosoma cruzi (strain CL Brener) GN=Tc00.1047053508197.10 PE=1 SV=1	1793400000
AALTDEQIR	A	Acetyl (Protein N-term)	2616	tr|Q4DQ49|Q4DQ49_TRYCC	1	0	0	0	By MS/MS	By MS/MS	By MS/MS	By MS/MS	1	1	0	24	4	4	4	4	4	4	58194	58637	1;2	0.0012784	44976	sample42_2	113.66	45288	6335500000	1192600000	1418800000	760930000	1485400000			105	2616	104	1179;1180;1181;1182;1183;1184;1185;1186;1187;1188;1189;1190;1191;1192;1193;1194;1195;1196;1197;1198;1199;1200;1201;1202	971;972;973;974;975;976;977;978;979;980;981	971			11	Q4DQ49	>tr|Q4DQ49|Q4DQ49_TRYCC Centrin, putative OS=Trypanosoma cruzi (strain CL Brener) GN=Tc00.1047053508323.60 PE=4 SV=1	5072500000
ASKPQPIAAANWK	A	Acetyl (Protein N-term)	2922	tr|Q4DV43|Q4DV43_TRYCC	1	0	0	1	By MS/MS	By matching	By MS/MS	By MS/MS	1	1	0	12	2	2	2	2	2	2	44392	44826	2	5.55e-14	34533	sample46_2	146.67	127.18	6167300000	1179000000	1379200000	659530000	1488700000			1334	2922	1273	13547;13548;13549;13550;13551;13552;13553;13554;13555;13556;13557;13558	10747;10748;10749;10750;10751;10752;10753;10754;10755;10756;10757;10758;10759;10760;10761;10762;10763;10764;10765;10766;10767	10764			21	Q4DV43	>tr|Q4DV43|Q4DV43_TRYCC Triosephosphate isomerase OS=Trypanosoma cruzi (strain CL Brener) GN=Tc00.1047053508647.200 PE=3 SV=1	5857200000
SAENAERPK	S	Acetyl (Protein N-term)	751	tr|Q4DE55|Q4DE55_TRYCC;tr|Q4CW23|Q4CW23_TRYCC	1	0	0	1	By MS/MS	By MS/MS	By MS/MS	By MS/MS	1	1	0	12	2	2	2	2	2	2	10674	11007	2	0.000475	4956	sample45_1	183.72	125.48	6643300000	1095200000	1292400000	920590000	1052400000			12018	751	11532	113312;113313;113314;113315;113316;113317;113318;113319;113320;113321;113322;113323	86249;86250;86251;86252;86253;86254;86255;86256;86257;86258;86259;86260;86261	86256			12	Q4DE55	>tr|Q4DE55|Q4DE55_TRYCC Uncharacterized protein OS=Trypanosoma cruzi (strain CL Brener) GN=Tc00.1047053504089.60 PE=4 SV=1;>tr|Q4CW23|Q4CW23_TRYCC Uncharacterized protein OS=Trypanosoma cruzi (strain CL Brener) GN=Tc00.1047053504001.10 PE=4 SV=1	3095300000
SDAAVPPK	S	Acetyl (Protein N-term)	699	tr|Q4CVA9|Q4CVA9_TRYCC	1	0	0	0	By MS/MS	By matching	By matching	By MS/MS	1	1	0	27	6	5	3	4	4	5	28877	29174	1;2	0.014493	18803	sample47_2	87696	53524	5868500000	951920000	1092000000	861370000	1107500000			12133	699	11642	114313;114314;114315;114316;114317;114318;114319;114320;114321;114322;114323;114324;114325;114326;114327;114328;114329;114330;114331;114332;114333;114334;114335;114336;114337;114338;114339	86967;86968;86969	86969			2	Q4CVA9	>tr|Q4CVA9|Q4CVA9_TRYCC Histone H1, putative OS=Trypanosoma cruzi (strain CL Brener) GN=Tc00.1047053509837.40 PE=4 SV=1	1366500000
SAENQWEELEDLPHR	S	Acetyl (Protein N-term)	138	tr|Q4CL00|Q4CL00_TRYCC	1	0	0	0	By MS/MS	By MS/MS	By MS/MS	By MS/MS	1	1	0	21	4	6	3	3	3	2	79075	79363	2;3	1.75e-18	63112	sample47_1	130.47	115.91	4667000000	888260000	1450600000	506890000	776450000			12021	138	11534	113332;113333;113334;113335;113336;113337;113338;113339;113340;113341;113342;113343;113344;113345;113346;113347;113348;113349;113350;113351;113352	86265;86266;86267;86268;86269;86270;86271;86272;86273;86274;86275;86276;86277;86278;86279	86278			15	Q4CL00	>tr|Q4CL00|Q4CL00_TRYCC Calpain-like cysteine peptidase, putative (Fragment) OS=Trypanosoma cruzi (strain CL Brener) GN=Tc00.1047053510957.9 PE=4 SV=1	1125200000
SSFTVPEKR	S	Acetyl (Protein N-term)	2702;2159	tr|Q4DRH6|Q4DRH6_TRYCC;tr|Q4DHC9|Q4DHC9_TRYCC	1	0	0	1	By MS/MS	By MS/MS	By MS/MS	By MS/MS	1	1	0	20	4	4	3	3	2	4	32.18	32494	2	0.0016204	26491	sample46_2	111.06	57309	5021100000	828570000	1032900000	702520000	1111800000			12976	2702;2159	12458	122403;122404;122405;122406;122407;122408;122409;122410;122411;122412;122413;122414;122415;122416;122417;122418;122419;122420;122421;122422	93146;93147;93148;93149;93150;93151;93152;93153;93154;93155;93156;93157;93158;93159	93156			14	Q4DRH6	>tr|Q4DRH6|Q4DRH6_TRYCC 14-3-3 protein, putative OS=Trypanosoma cruzi (strain CL Brener) GN=Tc00.1047053506775.80 PE=3 SV=1	6461300000
SACAHTYLSDTWNR	S	Acetyl (Protein N-term)	437	tr|Q4E4Q2|Q4E4Q2_TRYCC;tr|Q4CR48|Q4CR48_TRYCC	1	0	0	0	By MS/MS	By MS/MS	By MS/MS	By MS/MS	1	1	0	21	4	5	3	2	3	4	59617	60052	2	1.42e-22	44744	sample45_2	150.9	129.65	3015000000	730360000	779250000	324140000	578660000			11999	437	11513	113111;113112;113113;113114;113115;113116;113117;113118;113119;113120;113121;113122;113123;113124;113125;113126;113127;113128;113129;113130;113131	86069;86070;86071;86072;86073;86074;86075;86076;86077;86078;86079;86080;86081;86082;86083;86084;86085;86086;86087;86088	86081			20	Q4E4Q2	>tr|Q4E4Q2|Q4E4Q2_TRYCC Gim5A protein, putative OS=Trypanosoma cruzi (strain CL Brener) GN=Tc00.1047053508461.570 PE=4 SV=1;>tr|Q4CR48|Q4CR48_TRYCC Gim5A protein, putative OS=Trypanosoma cruzi (strain CL Brener) GN=Tc00.1047053510669.20 PE=4 SV=1	30167000000
MEFVQNWDGYAVR	M	Acetyl (Protein N-term)	2904	tr|Q4DUK7|Q4DUK7_TRYCC;tr|Q4DHY1|Q4DHY1_TRYCC	1	0	0	0	By MS/MS	By MS/MS	By MS/MS	By MS/MS	1	1	0	12	2	2	2	2	2	2	107.72	107.69	2	3.27e-20	89081	sample47_1	183.96	149.91	2863200000	587960000	845440000	400850000	594970000			9854	2904	9475	94630;94631;94632;94633;94634;94635;94636;94637;94638;94639;94640;94641	72816;72817;72818;72819;72820;72821;72822;72823;72824;72825;72826;72827;72828;72829;72830	72829			15	Q4DUK7	>tr|Q4DUK7|Q4DUK7_TRYCC Elongation of fatty acids protein OS=Trypanosoma cruzi (strain CL Brener) GN=Tc00.1047053511245.130 PE=3 SV=1;>tr|Q4DHY1|Q4DHY1_TRYCC Elongation of fatty acids protein OS=Trypanosoma cruzi (strain CL Brener) GN=Tc00.1047053506661.30	2421600000
MQEFHAFEVQPGK	M	Acetyl (Protein N-term)	2198	tr|Q4DHV9|Q4DHV9_TRYCC	1	0	0	0	By MS/MS	By MS/MS	By MS/MS	By MS/MS	1	1	0	12	2	2	2	2	2	2	74605	74964	2	9.04e-19	60357	sample44_2	155.39	133.06	3267000000	516860000	693270000	555200000	1069300000			10115	2198	9721	96708;96709;96710;96711;96712;96713;96714;96715;96716;96717;96718;96719	74356;74357;74358;74359;74360;74361;74362;74363;74364;74365;74366;74367;74368;74369;74370;74371;74372;74373	74364			18	Q4DHV9	>tr|Q4DHV9|Q4DHV9_TRYCC Nucleolar RNA-binding protein, putative OS=Trypanosoma cruzi (strain CL Brener) GN=Tc00.1047053507649.80 PE=4 SV=1	813440000
SGRPEEGHYGNEESQSPTVPR	S	Acetyl (Protein N-term)	3435	tr|Q4E3H4|Q4E3H4_TRYCC	1	0	0	1	By MS/MS	By MS/MS	By MS/MS	By MS/MS	1	1	0	23	4	4	4	3	4	4	30188	30508	2;3	8.06e-74	19795	sample44_2	172.55	125.44	3739400000	510240000	545150000	568400000	1055400000			12392	3435	11896	116861;116862;116863;116864;116865;116866;116867;116868;116869;116870;116871;116872;116873;116874;116875;116876;116877;116878;116879;116880;116881;116882;116883	88818;88819;88820;88821;88822;88823;88824;88825;88826;88827;88828;88829;88830;88831;88832;88833;88834;88835;88836;88837;88838;88839;88840	88827			23	Q4E3H4	>tr|Q4E3H4|Q4E3H4_TRYCC Retrotransposon hot spot (RHS) protein, putative OS=Trypanosoma cruzi (strain CL Brener) GN=Tc00.1047053507611.10 PE=4 SV=1	3304700000
STPQVQNPPVEDDEVPTLEAAEVPQVAK	S	Acetyl (Protein N-term)	1901;1655	tr|Q4DD49|Q4DD49_TRYCC;tr|Q4D9L7|Q4D9L7_TRYCC	1	0	0	0	By MS/MS	By MS/MS	By matching	By matching	1	1	0	8	2	2	2	1		1	95059	95.26	3	0.656	74494	sample42_1	59561	42.85	1542500000	475920000	175900000	0	448380000			13098	1901;1655	12575	123559;123560;123561;123562;123563;123564;123565;123566	94051;94052;94053;94054;94055;94056	94051			6	Q4DD49	>tr|Q4DD49|Q4DD49_TRYCC Nascent polypeptide associated complex subunit, putative OS=Trypanosoma cruzi (strain CL Brener) GN=Tc00.1047053510241.60 PE=4 SV=1	0
SIFGEPLPHEDDTATSLIR	S	Acetyl (Protein N-term)	520;1501	tr|Q4CSI2|Q4CSI2_TRYCC;tr|Q4D770|Q4D770_TRYCC	1	0	0	0	By MS/MS	By MS/MS	By MS/MS	By MS/MS	1	1	0	23	4	4	4	4	4	3	95.44	95.64	2;3	1.35e-36	77815	sample47_1	151.63	133.31	3894400000	444500000	443110000	775480000	1631800000			12487	520;1501	11985	117926;117927;117928;117929;117930;117931;117932;117933;117934;117935;117936;117937;117938;117939;117940;117941;117942;117943;117944;117945;117946;117947;117948	89741;89742;89743;89744;89745;89746;89747;89748;89749;89750;89751;89752;89753;89754;89755;89756;89757;89758;89759	89757			19	Q4CSI2	>tr|Q4CSI2|Q4CSI2_TRYCC Uncharacterized protein OS=Trypanosoma cruzi (strain CL Brener) GN=Tc00.1047053506441.20 PE=4 SV=1	7281700000
GFETLAGR	G	Acetyl (Protein N-term)	134	tr|Q4CKT7|Q4CKT7_TRYCC;tr|Q4E0S1|Q4E0S1_TRYCC	1	0	0	0	By matching	By MS/MS	By MS/MS	By matching	2	1	0	9	2	1	1	2	2	1	30501	30812	2	0.014452	19540	sample45_2	87754	23187	2437400000	361550000	440770000	419210000	462820000			5552	134	5329	54267;54268;54269;54270;54271;54272;54273;54274;54275	42118;42119;42120	42119			3	Q4CKT7	>tr|Q4CKT7|Q4CKT7_TRYCC Amastin, putative (Fragment) OS=Trypanosoma cruzi (strain CL Brener) GN=Tc00.1047053511497.19 PE=4 SV=1	484110000
SAEYDHLFK	S	Acetyl (Protein N-term)	991	tr|Q4CZR0|Q4CZR0_TRYCC	1	0	0	0	By MS/MS	By MS/MS	By MS/MS	By MS/MS	1	1	0	14	3	2	3	2	2	2	58.74	59.13	2	0.00035386	44938	sample44_2	143.03	79.34	2158000000	357970000	502000000	234680000	590760000			12027	991	11539	113390;113391;113392;113393;113394;113395;113396;113397;113398;113399;113400;113401;113402;113403	86293;86294;86295;86296;86297;86298;86299;86300;86301;86302;86303;86304	86298			11	Q4CZR0	>tr|Q4CZR0|Q4CZR0_TRYCC Small GTP-binding protein Rab1, putative OS=Trypanosoma cruzi (strain CL Brener) GN=Tc00.1047053503715.30 PE=4 SV=1	1448600000
ASAEVVSK	A	Acetyl (Protein N-term)	767	tr|Q4CWA5|Q4CWA5_TRYCC;tr|Q4CRC5|Q4CRC5_TRYCC	1	0	0	0	By matching	By MS/MS	By matching	By MS/MS	2	1	0	8	1	1	2	1	2	1	30074	30481	2	0.0093819	19139	sample44_1	99688	42.64	2303900000	345030000	310320000	414020000	213950000			1281	767	1220	13034;13035;13036;13037;13038;13039;13040;13041	10404;10405;10406	10405			2	Q4CWA5	>tr|Q4CWA5|Q4CWA5_TRYCC Arginine kinase, putative OS=Trypanosoma cruzi (strain CL Brener) GN=Tc00.1047053507241.30 PE=3 SV=1;>tr|Q4CRC5|Q4CRC5_TRYCC Arginine kinase (Fragment) OS=Trypanosoma cruzi (strain CL Brener) GN=Tc00.1047053482369.29 PE=3 SV=1	14882000000
AMSGVVVSDECIK	A	Acetyl (Protein N-term)	1579;711	tr|Q4D8D3|Q4D8D3_TRYCC;tr|Q4CVE9|Q4CVE9_TRYCC	1	0	0	0	By MS/MS	By MS/MS	By MS/MS	By MS/MS	1	1	0	25	4	5	6	2	4	4	73713	74.07	2	6.4e-12	64095	sample47_2	140.01	90726	1804500000	342970000	540850000	241190000	260490000			1040	1579;711	993	10769;10770;10771;10772;10773;10774;10775;10776;10777;10778;10779;10780;10781;10782;10783;10784;10785;10786;10787;10788;10789;10790;10791;10792;10793	8622;8623;8624;8625;8626;8627;8628;8629;8630;8631;8632;8633;8634;8635;8636;8637;8638;8639;8640;8641;8642;8643;8644	8643			22	Q4D8D3	>tr|Q4D8D3|Q4D8D3_TRYCC Cofilin/actin depolymerizing factor, putative OS=Trypanosoma cruzi (strain CL Brener) GN=Tc00.1047053508411.10 PE=3 SV=1	1012600000
SAGGAEFK	S	Acetyl (Protein N-term)	2127;418	tr|Q4DGT6|Q4DGT6_TRYCC;tr|Q4CQY1|Q4CQY1_TRYCC	1	0	0	0	By matching	By MS/MS	By matching	By matching	2	1	0	10	2	2	2	2	1	1	30.66	31006	1;2	0.028119	19411	sample43_1	90601	33148	2308900000	341880000	475190000	244000000	46419000			12034	2127;418	11546	113441;113442;113443;113444;113445;113446;113447;113448;113449;113450	86320;86321	86320			1	Q4DGT6	>tr|Q4DGT6|Q4DGT6_TRYCC Uncharacterized protein OS=Trypanosoma cruzi (strain CL Brener) GN=Tc00.1047053507081.130 PE=4 SV=1	1682600000
SGTEHDQSTDIFSADGR	S	Acetyl (Protein N-term)	609	tr|Q4DKR1|Q4DKR1_TRYCC;tr|Q4CTU6|Q4CTU6_TRYCC	1	0	0	0	By MS/MS	By MS/MS	By MS/MS	By MS/MS	1	1	0	12	2	2	2	2	2	2	52871	53338	2	2.54E-32	39126	sample45_2	149.42	133.06	2161100000	341290000	493560000	255710000	547420000			12408	609	11911	116977;116978;116979;116980;116981;116982;116983;116984;116985;116986;116987;116988	88914;88915;88916;88917;88918;88919;88920;88921;88922;88923;88924;88925;88926	88921			13	Q4DKR1	>tr|Q4DKR1|Q4DKR1_TRYCC Proteasome endopeptidase complex OS=Trypanosoma cruzi (strain CL Brener) GN=Tc00.1047053511867.50 PE=3 SV=1;>tr|Q4CTU6|Q4CTU6_TRYCC Proteasome endopeptidase complex OS=Trypanosoma cruzi (strain CL Brener) GN=Tc00.1047053507775.50 PE	607220000
SNFPAASPSIWVGGLDPNLNEQK	S	Acetyl (Protein N-term)	3515	tr|Q4E4V0|Q4E4V0_TRYCC	1	0	0	0	By MS/MS	By MS/MS	By MS/MS	By MS/MS	1	1	0	26	4	4	3	3	4	8	107.37	107.35	2;3	1.58e-62	89262	sample47_1	160.15	140.02	2292900000	334470000	285440000	553830000	930400000			12767	3515	12256	120669;120670;120671;120672;120673;120674;120675;120676;120677;120678;120679;120680;120681;120682;120683;120684;120685;120686;120687;120688;120689;120690;120691;120692;120693;120694	91829;91830;91831;91832;91833;91834;91835;91836;91837;91838;91839;91840;91841;91842;91843;91844;91845;91846;91847;91848;91849;91850;91851;91852;91853;91854;91855;91856;91857;91858;91859	91851			30	Q4E4V0	>tr|Q4E4V0|Q4E4V0_TRYCC Polyadenylate-binding protein OS=Trypanosoma cruzi (strain CL Brener) GN=Tc00.1047053508461.140 PE=3 SV=1	4786700000
SCDAEEPSGPIQVR	S	Acetyl (Protein N-term)	750	tr|Q4CW22|Q4CW22_TRYCC	1	0	0	0	By MS/MS	By MS/MS	By MS/MS	By MS/MS	1	1	0	16	3	4	2	2	2	3	53.6	54035	2	6.93e-15	41902	sample43_1	130.19	112.46	1788900000	330430000	315950000	221410000	420870000			12112	750	11624	114089;114090;114091;114092;114093;114094;114095;114096;114097;114098;114099;114100;114101;114102;114103;114104	86801;86802;86803;86804;86805;86806;86807;86808;86809;86810;86811;86812;86813;86814	86805			14	Q4CW22	>tr|Q4CW22|Q4CW22_TRYCC Uncharacterized protein OS=Trypanosoma cruzi (strain CL Brener) GN=Tc00.1047053504001.20 PE=4 SV=1	3535700000
ATFPELLR	A	Acetyl (Protein N-term)	3517;283	tr|Q4E4V7|Q4E4V7_TRYCC;tr|Q4CNI1|Q4CNI1_TRYCC	1	0	0	0	By MS/MS	By MS/MS	By MS/MS	By MS/MS	1	1	0	9	2	1	2	2	1	1	94822	95017	2	0.012031	79018	sample43_2	93429	50559	991320000	316300000	196750000	62811000	127710000			1413	3517;283	1352	14263;14264;14265;14266;14267;14268;14269;14270;14271	11298;11299;11300;11301;11302;11303	11299			6	Q4E4V7	>tr|Q4E4V7|Q4E4V7_TRYCC Prostaglandin F2alpha synthase OS=Trypanosoma cruzi (strain CL Brener) GN=Tc00.1047053508461.80 PE=4 SV=1	25445000000
TDAIDVTTYADDR	T	Acetyl (Protein N-term)	2283	tr|Q4DJ35|Q4DJ35_TRYCC	1	0	0	0	By MS/MS	By MS/MS	By MS/MS	By MS/MS	1	1	0	28	4	5	6	5	2	6	74409	74723	2	9.75e-06	64061	sample47_1	122.1	107.32	1354500000	297540000	292470000	120780000	240000000			13409	2283	12871	126297;126298;126299;126300;126301;126302;126303;126304;126305;126306;126307;126308;126309;126310;126311;126312;126313;126314;126315;126316;126317;126318;126319;126320;126321;126322;126323;126324	96182;96183;96184;96185;96186;96187;96188;96189;96190;96191;96192;96193;96194;96195;96196;96197;96198;96199;96200;96201;96202;96203;96204;96205;96206;96207;96208;96209;96210;96211;96212;96213;96214;96215;96216;96217	96214			34	Q4DJ35	>tr|Q4DJ35|Q4DJ35_TRYCC Uncharacterized protein OS=Trypanosoma cruzi (strain CL Brener) GN=Tc00.1047053511239.110 PE=4 SV=1	1783100000
AVVYEGQLK	A	Acetyl (Protein N-term)	2843	tr|Q4DTN2|Q4DTN2_TRYCC	1	0	0	0	By MS/MS	By MS/MS	By MS/MS	By MS/MS	1	1	0	19	4	3	3	1	4	4	63627	63.97	1;2	0.0055079	49187	sample46_1	96665	72.2	2969100000	295490000	205850000	866640000	1559300000			1639	2843	1565	16634;16635;16636;16637;16638;16639;16640;16641;16642;16643;16644;16645;16646;16647;16648;16649;16650;16651;16652	13301;13302;13303;13304;13305;13306;13307	13304			6	Q4DTN2	>tr|Q4DTN2|Q4DTN2_TRYCC Activated protein kinase C receptor, putative OS=Trypanosoma cruzi (strain CL Brener) GN=Tc00.1047053511211.120 PE=4 SV=1	5525000000
ADSNAVTVQEDLCDLQTQLEQR	A	Acetyl (Protein N-term)	634	tr|Q4CU92|Q4CU92_TRYCC;tr|Q4CMT5|Q4CMT5_TRYCC	1	0	0	0	By MS/MS	By MS/MS	By MS/MS	By MS/MS	1	1	0	23	4	3	4	4	4	4	107.39	107.37	2;3	4.84e-71	88834	sample47_1	175.02	157.88	1531400000	288620000	178070000	318930000	399690000			291	634	278	3195;3196;3197;3198;3199;3200;3201;3202;3203;3204;3205;3206;3207;3208;3209;3210;3211;3212;3213;3214;3215;3216;3217	2495;2496;2497;2498;2499;2500;2501;2502;2503;2504;2505;2506;2507;2508;2509;2510;2511;2512;2513;2514;2515;2516;2517;2518;2519;2520;2521	2518			27	Q4CU92	>tr|Q4CU92|Q4CU92_TRYCC Uncharacterized protein OS=Trypanosoma cruzi (strain CL Brener) GN=Tc00.1047053510947.30 PE=4 SV=1;>tr|Q4CMT5|Q4CMT5_TRYCC Uncharacterized protein OS=Trypanosoma cruzi (strain CL Brener) GN=Tc00.1047053509497.20 PE=4 SV=1	1271500000
AQNPSAVNNKK	A	Acetyl (Protein N-term)	2081;2006;2080	tr|Q4DG21|Q4DG21_TRYCC;tr|Q4DF37|Q4DF37_TRYCC;tr|Q4CXR9|Q4CXR9_TRYCC;tr|Q4DG20|Q4DG20_TRYCC;tr|Q4DF38|Q4DF38_TRYCC	1	0	0	1	By MS/MS	By MS/MS	By MS/MS	By MS/MS	1	1	0	12	2	2	2	2	2	2	11412	11746	2	5.22e-20	5144	sample46_1	192.44	132.51	2025400000	274230000	383340000	403650000	459400000			1230	2081;2080;2006	1172	12532;12533;12534;12535;12536;12537;12538;12539;12540;12541;12542;12543	10003;10004;10005;10006;10007;10008;10009;10010;10011;10012	10010			10	Q4DG21	>tr|Q4DG21|Q4DG21_TRYCC Cystathionine beta-synthase, putative OS=Trypanosoma cruzi (strain CL Brener) GN=Tc00.1047053508241.140 PE=4 SV=1;>tr|Q4DF37|Q4DF37_TRYCC Cystathionine beta-synthase OS=Trypanosoma cruzi (strain CL Brener) GN=Tc00.1047053508177.120	4525100000
AATGGGDIEELVK	A	Acetyl (Protein N-term)	1172;1197	tr|Q4D299|Q4D299_TRYCC;tr|Q4D2U6|Q4D2U6_TRYCC	1	0	0	0	By matching	By MS/MS	By matching	By MS/MS	2	1	0	10	2	2	1	2	1	2	77165	77434	2	0.00077567	62606	sample44_2	92151	40792	752280000	274140000	119350000	13503000	91193000			164	1172;1197	158	1794;1795;1796;1797;1798;1799;1800;1801;1802;1803	1437;1438;1439;1440;1441;1442	1438			6	Q4D299	>tr|Q4D299|Q4D299_TRYCC Dynein light chain roadblock OS=Trypanosoma cruzi (strain CL Brener) GN=Tc00.1047053503521.30 PE=3 SV=1	0
AIAECSPNHLVLK	A	Acetyl (Protein N-term)	2954	tr|Q4DVM9|Q4DVM9_TRYCC;tr|Q4DNZ3|Q4DNZ3_TRYCC	1	0	0	0	By matching	By MS/MS	By matching	By MS/MS	2	1	0	11	2	2	1	2	2	2	57.84	58277	2	0.00455	42682	sample43_2	125.03	73898	1391300000	254430000	303710000	208610000	398770000			674	2954	644	6939;6940;6941;6942;6943;6944;6945;6946;6947;6948;6949	5470;5471;5472;5473;5474	5471			5	Q4DVM9	>tr|Q4DVM9|Q4DVM9_TRYCC Adenine phosphoribosyltransferase, putative OS=Trypanosoma cruzi (strain CL Brener) GN=Tc00.1047053508207.70 PE=4 SV=1	297920000
SAANATQQVIPK	S	Acetyl (Protein N-term)	1502	tr|Q4D773|Q4D773_TRYCC	1	0	0	0	By MS/MS	By matching	By MS/MS	By matching	1	1	0	11	2	2	2	2	2	1	51234	51666	2	0.00282	41205	sample46_2	130.69	86071	1299900000	251330000	336680000	180070000	150400000			11995	1502	11509	113062;113063;113064;113065;113066;113067;113068;113069;113070;113071;113072	86040;86041;86042;86043;86044	86044			5	Q4D773	>tr|Q4D773|Q4D773_TRYCC Mitochondrial pyruvate carrier OS=Trypanosoma cruzi (strain CL Brener) GN=Tc00.1047053508265.44 PE=3 SV=1;>tr|Q4DMF5|Q4DMF5_TRYCC Mitochondrial pyruvate carrier OS=Trypanosoma cruzi (strain CL Brener) GN=Tc00.1047053506443.40 PE=3 S	523090000
SFEFAFHDVSNDAIK	S	Acetyl (Protein N-term)	673	tr|Q4CUW6|Q4CUW6_TRYCC	1	0	0	0	By MS/MS	By MS/MS	By MS/MS	By MS/MS	1	1	0	86	11	17	14	13	14	17	90.4	90662	2	3.11e-39	80182	sample46_2	176.25	128.54	1450500000	227300000	467430000	218230000	226050000			12286	673	11792	115812;115813;115814;115815;115816;115817;115818;115819;115820;115821;115822;115823;115824;115825;115826;115827;115828;115829;115830;115831;115832;115833;115834;115835;115836;115837;115838;115839;115840;115841;115842;115843;115844;115845;115846;115847;115848;115849;115850;115851;115852;115853;115854;115855;115856;115857;115858;115859;115860;115861;115862;115863;115864;115865;115866;115867;115868;…	88009;88010;88011;88012;88013;88014;88015;88016;88017;88018;88019;88020;88021;88022;88023;88024;88025;88026;88027;88028;88029;88030;88031;88032;88033;88034;88035;88036;88037;88038;88039;88040;88041;88042;88043;88044;88045;88046;88047;88048;88049;88050;88051;88052;88053;88054;88055;88056;88057;88058;88059;88060;88061;88062;88063;88064;88065;88066;88067;88068;88069;88070;88071;88072;88073	88059			59	Q4CUW6	>tr|Q4CUW6|Q4CUW6_TRYCC Uncharacterized protein OS=Trypanosoma cruzi (strain CL Brener) GN=Tc00.1047053507777.20 PE=4 SV=1	422410000
MDDNLAAEIAR	M	Acetyl (Protein N-term)	1677	tr|Q4DA03|Q4DA03_TRYCC	1	0	0	0	By MS/MS	By MS/MS	By MS/MS	By MS/MS	1	1	0	25	4	6	4	5	2	4	68322	68568	1;2	0.00076471	72172	sample42_2	95417	67936	1597600000	222780000	562780000	43648000	482600000			9788	1677	9417	94151;94152;94153;94154;94155;94156;94157;94158;94159;94160;94161;94162;94163;94164;94165;94166;94167;94168;94169;94170;94171;94172;94173;94174;94175	72420;72421;72422;72423;72424;72425;72426;72427;72428;72429;72430;72431;72432	72422			10	Q4DA03	>tr|Q4DA03|Q4DA03_TRYCC Uncharacterized protein OS=Trypanosoma cruzi (strain CL Brener) GN=Tc00.1047053506797.120 PE=4 SV=1	221490000
TDIDGSNVPAPTNAALIVSPEK	T	Acetyl (Protein N-term)	357	tr|Q4CPV9|Q4CPV9_TRYCC	1	0	0	0	By MS/MS	By MS/MS	By MS/MS	By MS/MS	1	1	0	31	5	5	6	4	4	7	89298	89556	2;3	2.19e-07	74935	sample46_1	101.75	67573	1468600000	214630000	265000000	189360000	393300000			13430	357	12891	126490;126491;126492;126493;126494;126495;126496;126497;126498;126499;126500;126501;126502;126503;126504;126505;126506;126507;126508;126509;126510;126511;126512;126513;126514;126515;126516;126517;126518;126519;126520	96346;96347;96348;96349;96350;96351;96352;96353;96354;96355;96356;96357;96358;96359;96360;96361;96362;96363;96364;96365;96366;96367;96368;96369;96370;96371;96372;96373;96374;96375;96376;96377;96378;96379	96368			32	Q4CPV9	>tr|Q4CPV9|Q4CPV9_TRYCC Uncharacterized protein OS=Trypanosoma cruzi (strain CL Brener) GN=Tc00.1047053503819.10 PE=4 SV=1	1368400000
MQTVIQQIHQANLK	M	Acetyl (Protein N-term)	1703	tr|Q4DAD0|Q4DAD0_TRYCC;tr|Q4CM10|Q4CM10_TRYCC	1	0	0	0	By MS/MS	By MS/MS	By MS/MS	By MS/MS	1	1	0	12	2	2	2	2	2	2	78.12	78412	2	1.72e-109	69019	sample46_2	215.09	169.47	1123500000	187220000	288830000	149690000	250050000			10138	1703	9742	96866;96867;96868;96869;96870;96871;96872;96873;96874;96875;96876;96877	74465;74466;74467;74468;74469;74470;74471;74472;74473;74474;74475	74474			11	Q4DAD0	>tr|Q4DAD0|Q4DAD0_TRYCC Uncharacterized protein OS=Trypanosoma cruzi (strain CL Brener) GN=Tc00.1047053508989.110 PE=4 SV=1;>tr|Q4CM10|Q4CM10_TRYCC Uncharacterized protein (Fragment) OS=Trypanosoma cruzi (strain CL Brener) GN=Tc00.1047053466593.19 PE=4 SV=	150120000
SLEDDWKK	S	Acetyl (Protein N-term)	2241	tr|Q4DIE1|Q4DIE1_TRYCC	1	0	0	1	By MS/MS	By MS/MS	By MS/MS	By MS/MS	1	1	0	11	2	2	2	1	2	2	43504	43932	2	0.0022646	32973	sample47_2	135.83	46476	1180000000	179920000	249340000	180910000	316650000			12589	2241	12082	119013;119014;119015;119016;119017;119018;119019;119020;119021;119022;119023	90549;90550;90551;90552;90553;90554	90554			6	Q4DIE1	>tr|Q4DIE1|Q4DIE1_TRYCC ATP-dependent DEAD/H RNA helicase, putative OS=Trypanosoma cruzi (strain CL Brener) GN=Tc00.1047053506959.30 PE=3 SV=1	1925100000
ATVPVPVER	A	Acetyl (Protein N-term)	722	tr|Q4CVK6|Q4CVK6_TRYCC	1	0	0	0	By MS/MS	By matching	By matching	By matching	1	1	0	12	2	2	2	2	2	2	62894	63253	1	0.033217	47083	sample42_1	65252	51673	934220000	173200000	219370000	87507000	291350000			1486	722	1419	15049;15050;15051;15052;15053;15054;15055;15056;15057;15058;15059;15060	11926	11926			0	Q4CVK6	>tr|Q4CVK6|Q4CVK6_TRYCC Pyrroline-5-carboxylate synthetase-like protein, putative (Fragment) OS=Trypanosoma cruzi (strain CL Brener) GN=Tc00.1047053503749.5 PE=4 SV=1	0
SVPMIPIDPDKR	S	Acetyl (Protein N-term)	515;3185	tr|Q4DZB0|Q4DZB0_TRYCC;tr|Q4CSE1|Q4CSE1_TRYCC	1	0	0	1	By MS/MS	By MS/MS	By MS/MS	By MS/MS	1	1	0	14	3	2	2	2	3	2	76136	76443	2	0.00011828	66968	sample46_2	118.9	95437	953200000	171210000	207460000	152160000	240400000			13198	3185;515	12673	124391;124392;124393;124394;124395;124396;124397;124398;124399;124400;124401;124402;124403;124404	94629;94630;94631;94632;94633;94634;94635;94636;94637;94638;94639;94640;94641;94642;94643	94640			15	Q4DZB0	>tr|Q4DZB0|Q4DZB0_TRYCC Eukaryotic translation initiation factor 5, putative OS=Trypanosoma cruzi (strain CL Brener) GN=Tc00.1047053504105.20 PE=4 SV=1	0
SDFDKFVK	S	Acetyl (Protein N-term)	1267;1599	tr|Q4D8L7|Q4D8L7_TRYCC;tr|Q4D418|Q4D418_TRYCC	1	0	0	1	By MS/MS	By MS/MS	By matching	By MS/MS	1	1	0	12	2	2	2	2	2	2	56304	56771	2	0.0064465	43274	sample42_2	115.71	74288	918920000	164440000	198300000	100080000	224150000			12158	1599;1267	11666	114546;114547;114548;114549;114550;114551;114552;114553;114554;114555;114556;114557	87156;87157;87158;87159;87160	87156			5	Q4D8L7	>tr|Q4D8L7|Q4D8L7_TRYCC Glycosomal membrane protein, putative OS=Trypanosoma cruzi (strain CL Brener) GN=Tc00.1047053509203.40 PE=4 SV=1	0
SLEEVEPNFFILSPDSPLR	S	Acetyl (Protein N-term)	2547	tr|Q4DNZ4|Q4DNZ4_TRYCC	1	0	0	0	By MS/MS	By matching	By matching	By MS/MS	1	1	0	5	2	1		1		1	112.11	112.1	2	5.73e-09	100484	sample42_2	123.63	94211	297700000	161130000	73251000	0	0			12599	2547	12092	119140;119141;119142;119143;119144	90663;90664;90665	90664			3	Q4DNZ4	>tr|Q4DNZ4|Q4DNZ4_TRYCC Adenine phosphoribosyltransferase, putative OS=Trypanosoma cruzi (strain CL Brener) GN=Tc00.1047053507519.140 PE=4 SV=1	212790000
MNRPPATDSGASEFVR	M	Acetyl (Protein N-term)	3198	tr|Q4DZJ3|Q4DZJ3_TRYCC	1	0	0	1	By MS/MS	By MS/MS	By MS/MS	By MS/MS	1	1	0	12	2	2	2	2	2	2	52.63	53097	2	5.64e-26	37722	sample45_1	139.12	102.52	953570000	156020000	274020000	83402000	164280000			10083	3198	9689	96434;96435;96436;96437;96438;96439;96440;96441;96442;96443;96444;96445	74182;74183;74184;74185;74186;74187;74188;74189;74190;74191	74187			10	Q4DZJ3	>tr|Q4DZJ3|Q4DZJ3_TRYCC Aminopeptidase, putative OS=Trypanosoma cruzi (strain CL Brener) GN=Tc00.1047053508799.240 PE=4 SV=1	1687200000
AAATATNNNSDGLTDGVWPEFSQELCEELNEK	A	Acetyl (Protein N-term)	2395	tr|Q4DKU5|Q4DKU5_TRYCC	1	0	0	0	By MS/MS	By MS/MS	By matching	By MS/MS	1	1	0	10	2	2	2	2		2	109.98	109.96	3	1.64e-43	104262	sample47_2	129.8	111.45	607670000	150900000	115780000	0	148900000			36	2395	36	494;495;496;497;498;499;500;501;502;503	392;393;394;395;396;397;398;399;400;401;402;403;404;405;406	406			15	Q4DKU5	>tr|Q4DKU5|Q4DKU5_TRYCC Uncharacterized protein OS=Trypanosoma cruzi (strain CL Brener) GN=Tc00.1047053509769.80 PE=4 SV=1	379670000
MIYSGEIENGQMHGR	M	Acetyl (Protein N-term)	738	tr|Q4CVX7|Q4CVX7_TRYCC;tr|Q4CYX2|Q4CYX2_TRYCC	1	0	0	0	By MS/MS	By MS/MS	By MS/MS	By MS/MS	1	1	0	13	2	2	3	2	2	2	61365	61724	2	2.01e-22	45931	sample43_2	146.84	122.14	1106800000	140650000	280870000	136320000	314480000			9982	738	9592	95710;95711;95712;95713;95714;95715;95716;95717;95718;95719;95720;95721;95722	73651;73652;73653;73654;73655;73656;73657;73658;73659;73660;73661;73662;73663;73664;73665;73666	73654			16	Q4CVX7	>tr|Q4CVX7|Q4CVX7_TRYCC Uncharacterized protein OS=Trypanosoma cruzi (strain CL Brener) GN=Tc00.1047053511729.60 PE=4 SV=1;>tr|Q4CYX2|Q4CYX2_TRYCC Uncharacterized protein (Fragment) OS=Trypanosoma cruzi (strain CL Brener) GN=Tc00.1047053506833.79 PE=4 SV=1	1321400000
SAEEATGLEAAR	S	Acetyl (Protein N-term)	1431	tr|Q4D634|Q4D634_TRYCC	1	0	0	0	By MS/MS	By MS/MS	By MS/MS	By MS/MS	1	1	0	13	2	3	2	2	2	2	50665	51129	2	0.00021585	38166	sample42_2	115.92	49	524590000	137880000	109320000	88402000	56096000			12013	1431	11527	113266;113267;113268;113269;113270;113271;113272;113273;113274;113275;113276;113277;113278	86199;86200;86201;86202;86203;86204;86205;86206;86207;86208;86209;86210;86211	86200			10	Q4D634	>tr|Q4D634|Q4D634_TRYCC Paraflagellar rod protein 3, putative OS=Trypanosoma cruzi (strain CL Brener) GN=Tc00.1047053509617.20 PE=4 SV=1	4407100000
SDEEQSAIVCDNGSGMVK	S	Acetyl (Protein N-term)	932	tr|Q4CYQ8|Q4CYQ8_TRYCC;tr|Q4D7A6|Q4D7A6_TRYCC;tr|Q4CYQ7|Q4CYQ7_TRYCC	1	0	0	0	By MS/MS	By MS/MS	By MS/MS	By MS/MS	1	1	0	14	2	3	2	3	2	2	62334	62692	2	3.39e-47	49026	sample42_2	158.98	125.62	705530000	130220000	144870000	99841000	152610000			12154	932	11663	114508;114509;114510;114511;114512;114513;114514;114515;114516;114517;114518;114519;114520;114521	87124;87125;87126;87127;87128;87129;87130;87131;87132;87133;87134;87135;87136;87137;87138;87139;87140	87126			16	Q4CYQ8	>tr|Q4CYQ8|Q4CYQ8_TRYCC Actin, putative OS=Trypanosoma cruzi (strain CL Brener) GN=Tc00.1047053510571.30 PE=3 SV=1;>tr|Q4D7A6|Q4D7A6_TRYCC Actin, putative (Fragment) OS=Trypanosoma cruzi (strain CL Brener) GN=Tc00.1047053510127.79 PE=3 SV=1;>tr|Q4CYQ7|Q4CY	3669200000
MFMVDTDGSAISYHIPVSPFVPLQHDK	M	Acetyl (Protein N-term)	2019;1009	tr|Q4D001|Q4D001_TRYCC;tr|Q4DFA9|Q4DFA9_TRYCC	1	0	0	0	By MS/MS	By MS/MS	By MS/MS	By MS/MS	1	1	0	11	2	2	2	2	1	2	105.95	105.94	3	0.00743	86842	sample46_1	81.48	67141	1071500000	127970000	300680000	115040000	357080000			9911	1009;2019	9526	95076;95077;95078;95079;95080;95081;95082;95083;95084;95085;95086	73143;73144;73145;73146;73147;73148;73149;73150;73151;73152	73150			10	Q4D001	>tr|Q4D001|Q4D001_TRYCC Uncharacterized protein OS=Trypanosoma cruzi (strain CL Brener) GN=Tc00.1047053509505.40 PE=4 SV=1	0
SSEATVVEHQPAYRPDDPEFYLQDQGQR	S	Acetyl (Protein N-term)	1954	tr|Q4DDY7|Q4DDY7_TRYCC	1	0	0	1	By MS/MS	By MS/MS	By MS/MS	By MS/MS	1	1	0	9	2	1		2	2	2	70324	70702	3	2.7e-07	54802	sample43_2	99078	81864	570230000	127070000	91921000	101770000	178880000			12965	1954	12448	122321;122322;122323;122324;122325;122326;122327;122328;122329	93095;93096;93097;93098;93099;93100;93101;93102;93103;93104;93105;93106;93107;93108;93109;93110	93097			16	Q4DDY7	>tr|Q4DDY7|Q4DDY7_TRYCC ADP/ATP translocase, putative OS=Trypanosoma cruzi (strain CL Brener) GN=Tc00.1047053511249.20 PE=3 SV=1	407570000
AEDKHNDELMEVEEVAVSDGGVAR	A	Acetyl (Protein N-term)	2757	tr|Q4DSH6|Q4DSH6_TRYCC	1	0	0	1	By MS/MS	By MS/MS	By MS/MS	By MS/MS	1	1	0	14	3	2	1	2	3	3	76794	77094	2;3	3.84e-25	62499	sample45_2	127.96	99523	687670000	108800000	101940000	191570000	207050000			322	2757	308	3499;3500;3501;3502;3503;3504;3505;3506;3507;3508;3509;3510;3511;3512	2746;2747;2748;2749;2750;2751;2752;2753;2754;2755;2756;2757;2758;2759;2760	2753			15	Q4DSH6	>tr|Q4DSH6|Q4DSH6_TRYCC Ran-binding protein 1, putative OS=Trypanosoma cruzi (strain CL Brener) GN=Tc00.1047053507099.30 PE=4 SV=1	646410000
TAFLDNK	T	Acetyl (Protein N-term)	3333	tr|Q4E1S6|Q4E1S6_TRYCC;tr|Q4D6Z4|Q4D6Z4_TRYCC	1	0	0	0	By matching	By matching	By matching	By MS/MS	4	1	0	11	2	2	1	3	1	2	65335	65695	1;2	0.027027	55247	sample47_2	146.21	106.1	451010000	107400000	129460000	25966000	130460000			13328	3333	12795	125624;125625;125626;125627;125628;125629;125630;125631;125632;125633;125634	95653;95654	95654			2	Q4E1S6	>tr|Q4E1S6|Q4E1S6_TRYCC Adenylate kinase, putative OS=Trypanosoma cruzi (strain CL Brener) GN=Tc00.1047053506855.180 PE=3 SV=1;>tr|Q4D6Z4|Q4D6Z4_TRYCC Adenylate kinase, putative OS=Trypanosoma cruzi (strain CL Brener) GN=Tc00.1047053503479.30 PE=3 SV=1	580340000
ADDAIKEQLENAR	A	Acetyl (Protein N-term)	778	tr|Q4CWI3|Q4CWI3_TRYCC	1	0	0	1	By MS/MS	By MS/MS	By MS/MS	By MS/MS	1	1	0	12	2	2	2	2	2	2	59.7	60101	2	0.00087854	43597	sample45_1	96707	64793	711040000	106600000	169230000	87613000	233060000			225	778	215	2553;2554;2555;2556;2557;2558;2559;2560;2561;2562;2563;2564	2035;2036;2037;2038;2039;2040;2041;2042;2043;2044;2045;2046;2047;2048;2049;2050	2041			16	Q4CWI3	>tr|Q4CWI3|Q4CWI3_TRYCC Uncharacterized protein (Fragment) OS=Trypanosoma cruzi (strain CL Brener) GN=Tc00.1047053508727.9 PE=4 SV=1	0
MQVPSTSDCVATFK	M	Acetyl (Protein N-term)	2237	tr|Q4DIB9|Q4DIB9_TRYCC	1	0	0	0	By MS/MS	By MS/MS	By MS/MS	By MS/MS	1	1	0	12	2	2	2	2	2	2	78339	78631	2	0.925	59625	sample45_1	88706	68864	818920000	101830000	154460000	163510000	284550000			10141	2237	9745	96890;96891;96892;96893;96894;96895;96896;96897;96898;96899;96900;96901	74486;74487;74488;74489;74490;74491;74492	74490			7	Q4DIB9	>tr|Q4DIB9|Q4DIB9_TRYCC GTP-binding nuclear protein OS=Trypanosoma cruzi (strain CL Brener) GN=Tc00.1047053509455.80 PE=3 SV=1;>tr|Q4CP51|Q4CP51_TRYCC GTP-binding nuclear protein OS=Trypanosoma cruzi (strain CL Brener) GN=Tc00.1047053503539.30 PE=3 SV=1	370930000
METNVETQR	M	Acetyl (Protein N-term)	2948;2947	tr|Q4DVF8|Q4DVF8_TRYCC;tr|Q4DVF9|Q4DVF9_TRYCC	1	0	0	0	By MS/MS	By matching	By MS/MS	By MS/MS	1	1	0	13	2	2	2	2	2	3	41175	41626	2	0.00553	31290	sample46_2	94465	55715	844250000	101740000	156200000	138940000	247980000			9898	2947;2948	9514	95003;95004;95005;95006;95007;95008;95009;95010;95011;95012;95013;95014;95015	73101;73102;73103;73104	73102			3	Q4DVF8	>tr|Q4DVF8|Q4DVF8_TRYCC Uncharacterized protein OS=Trypanosoma cruzi (strain CL Brener) GN=Tc00.1047053506859.180 PE=4 SV=1	109020000
SGNQASAVPQGDDQRR	S	Acetyl (Protein N-term)	2471;2994	tr|Q4DME9|Q4DME9_TRYCC;tr|Q4DWB1|Q4DWB1_TRYCC	1	0	0	1	By MS/MS	By MS/MS	By MS/MS	By MS/MS	1	1	0	11	2	2	2	1	2	2	21629	21.77	2	0.21	12782	sample42_1	97223	75281	563910000	98794000	101630000	82681000	157060000			12385	2471;2994	11889	116778;116779;116780;116781;116782;116783;116784;116785;116786;116787;116788	88742;88743;88744;88745;88746;88747;88748;88749;88750;88751;88752	88742			11	Q4DME9	>tr|Q4DME9|Q4DME9_TRYCC Retrotransposon hot spot (RHS) protein, putative OS=Trypanosoma cruzi (strain CL Brener) GN=Tc00.1047053506443.150 PE=4 SV=1	2026800000
ADQLSNEQISEFKEAFSLFDKDGDGTITTK	A	Acetyl (Protein N-term)	549	tr|Q4CSZ2|Q4CSZ2_TRYCC;tr|Q4D137|Q4D137_TRYCC;tr|Q4D2S5|Q4D2S5_TRYCC	1	0	0	2	By MS/MS	By MS/MS	By MS/MS	By matching	1	1	0	10	2	2	2	2	1	1	105.25	105.23	3	2.75e-05	91662	sample45_2	90907	77.5	432640000	98641000	97926000	25623000	22539000			286	549	273	3142;3143;3144;3145;3146;3147;3148;3149;3150;3151	2455;2456;2457;2458;2459;2460;2461;2462	2461			8	Q4CSZ2	>tr|Q4CSZ2|Q4CSZ2_TRYCC Calmodulin OS=Trypanosoma cruzi (strain CL Brener) GN=Tc00.1047053506391.10 PE=4 SV=1;>tr|Q4D137|Q4D137_TRYCC Calmodulin OS=Trypanosoma cruzi (strain CL Brener) GN=Tc00.1047053507483.50 PE=4 SV=1;>tr|Q4D139|Q4D139_TRYCC Calmodulin,	14011000000
AQNPSAVNNK	A	Acetyl (Protein N-term)	2081;2006;2080	tr|Q4DG21|Q4DG21_TRYCC;tr|Q4DF37|Q4DF37_TRYCC;tr|Q4CXR9|Q4CXR9_TRYCC;tr|Q4DG20|Q4DG20_TRYCC;tr|Q4DF38|Q4DF38_TRYCC	1	0	0	0	By MS/MS	By MS/MS	By MS/MS	By MS/MS	1	1	0	17	3	2	3	3	4	2	19708	19938	1;2	0.288	11929	sample46_2	123.96	93159	890150000	98425000	91416000	302360000	117380000			1229	2081;2080;2006	1171	12515;12516;12517;12518;12519;12520;12521;12522;12523;12524;12525;12526;12527;12528;12529;12530;12531	9992;9993;9994;9995;9996;9997;9998;9999;10000;10001;10002	9999			11	Q4DG21	>tr|Q4DG21|Q4DG21_TRYCC Cystathionine beta-synthase, putative OS=Trypanosoma cruzi (strain CL Brener) GN=Tc00.1047053508241.140 PE=4 SV=1;>tr|Q4DF37|Q4DF37_TRYCC Cystathionine beta-synthase OS=Trypanosoma cruzi (strain CL Brener) GN=Tc00.1047053508177.120	4525100000
SVRPLVEDVEEMFGR	S	Acetyl (Protein N-term)	1963	tr|Q4DE57|Q4DE57_TRYCC;tr|Q4CW25|Q4CW25_TRYCC	1	0	0	1	By MS/MS	By MS/MS	By MS/MS	By MS/MS	1	1	0	12	2	2	2	2	2	2	107.33	107.31	2	0.00014298	84778	sample43_1	88319	61494	892110000	98202000	257770000	104970000	252840000			13206	1963	12681	124470;124471;124472;124473;124474;124475;124476;124477;124478;124479;124480;124481	94673;94674;94675;94676;94677;94678	94674			6	Q4DE57	>tr|Q4DE57|Q4DE57_TRYCC Flagellar radial spoke component, putative OS=Trypanosoma cruzi (strain CL Brener) GN=Tc00.1047053504089.50 PE=4 SV=1;>tr|Q4CW25|Q4CW25_TRYCC Flagellar radial spoke component, putative (Fragment) OS=Trypanosoma cruzi (strain CL Bren	395150000
EGALPTGITNK	E	Acetyl (Protein N-term)	1527	tr|Q4D7L6|Q4D7L6_TRYCC	1	0	0	0	By matching	By matching	By MS/MS	By matching	3	1	0	8	1		2	2	1	2	49783	50222	2	0.015021	39566	sample46_2	66.56	13981	853440000	97497000	0	35877000	121690000			3483	1527	3338	34108;34109;34110;34111;34112;34113;34114;34115	26645	26645			1	Q4D7L6	>tr|Q4D7L6|Q4D7L6_TRYCC Serine/threonine-protein phosphatase OS=Trypanosoma cruzi (strain CL Brener) GN=Tc00.1047053509453.50 PE=3 SV=1;>tr|Q4CTY6|Q4CTY6_TRYCC Serine/threonine-protein phosphatase OS=Trypanosoma cruzi (strain CL Brener) GN=Tc00.10470535118	0
TAQKPTEMTTEER	T	Acetyl (Protein N-term)	2774	tr|Q4DSP6|Q4DSP6_TRYCC	1	0	0	1	By MS/MS	By matching	By MS/MS	By MS/MS	1	1	0	12	2	2	2	2	2	2	26494	26753	2	0.0002267	17092	sample47_2	116.58	92.62	591030000	96837000	110000000	101170000	134130000			13360	2774	12826	125835;125836;125837;125838;125839;125840;125841;125842;125843;125844;125845;125846	95785;95786;95787;95788;95789;95790	95790			6	Q4DSP6	>tr|Q4DSP6|Q4DSP6_TRYCC Tyrosyl-tRNA synthetase, putative OS=Trypanosoma cruzi (strain CL Brener) GN=Tc00.1047053509937.180 PE=4 SV=1	281360000
SNLYDVLGIHHEAEDDAIAK	S	Acetyl (Protein N-term)	2816;1304	tr|Q4D4G9|Q4D4G9_TRYCC;tr|Q4DTD8|Q4DTD8_TRYCC	1	0	0	0	By MS/MS	By MS/MS	By MS/MS	By MS/MS	1	1	0	19	3	4	2	2	4	4	79111	79422	2;3	1.25e-31	69922	sample47_2	144.5	120.14	1688500000	93189000	439420000	420830000	501970000			12788	1304;2816	12274	120874;120875;120876;120877;120878;120879;120880;120881;120882;120883;120884;120885;120886;120887;120888;120889;120890;120891;120892	92023;92024;92025;92026;92027;92028;92029;92030;92031;92032;92033;92034;92035;92036;92037;92038;92039;92040;92041;92042;92043;92044;92045;92046;92047;92048	92048			26	Q4D4G9	>tr|Q4D4G9|Q4D4G9_TRYCC Heat shock protein-like protein, putative OS=Trypanosoma cruzi (strain CL Brener) GN=Tc00.1047053508443.20 PE=4 SV=1	0
AALVEAER	A	Acetyl (Protein N-term)	570	tr|Q4E0R9|Q4E0R9_TRYCC;tr|Q4CTB4|Q4CTB4_TRYCC	1	0	0	0	By MS/MS	By matching	By MS/MS	By MS/MS	1	1	0	12	2	2	2	2	2	2	59779	60179	2	0.011248	49156	sample47_2	95909	40379	445780000	91562000	92223000	67461000	109850000			108	570	106	1213;1214;1215;1216;1217;1218;1219;1220;1221;1222;1223;1224	987;988;989;990	989			4	Q4E0R9	>tr|Q4E0R9|Q4E0R9_TRYCC Uncharacterized protein OS=Trypanosoma cruzi (strain CL Brener) GN=Tc00.1047053509965.420 PE=4 SV=1;>tr|Q4CTB4|Q4CTB4_TRYCC Uncharacterized protein OS=Trypanosoma cruzi (strain CL Brener) GN=Tc00.1047053509049.40 PE=4 SV=1	296430000
SLDVDAIIDK	S	Acetyl (Protein N-term)	2483	tr|Q4DMJ3|Q4DMJ3_TRYCC	1	0	0	0	By MS/MS	By matching	By MS/MS	By matching	1	1	0	18	5	1	4	4	3	1	95518	95668	1;2	0.00018793	74998	sample42_1	118.23	67442	235500000	91356000	10027000	32697000	8936300			12583	2483	12076	118945;118946;118947;118948;118949;118950;118951;118952;118953;118954;118955;118956;118957;118958;118959;118960;118961;118962	90473;90474;90475;90476;90477;90478;90479;90480;90481;90482;90483;90484;90485;90486;90487;90488;90489;90490;90491;90492;90493	90474			21	Q4DMJ3	>tr|Q4DMJ3|Q4DMJ3_TRYCC Serine/threonine-protein phosphatase OS=Trypanosoma cruzi (strain CL Brener) GN=Tc00.1047053508815.110 PE=3 SV=1	491910000
SVFIIPHSGK	S	Acetyl (Protein N-term)	2007	tr|Q4DF41|Q4DF41_TRYCC	1	0	0	0	By MS/MS	By MS/MS	By MS/MS	By MS/MS	1	1	0	7	2	1			2	2	64814	65172	2	0.0041088	50272	sample47_1	85963	59.9	334480000	91306000	52014000	72564000	118590000			13154	2007	12630	123991;123992;123993;123994;123995;123996;123997	94331;94332;94333;94334;94335	94334			2	Q4DF41	>tr|Q4DF41|Q4DF41_TRYCC Uncharacterized protein OS=Trypanosoma cruzi (strain CL Brener) GN=Tc00.1047053508177.70 PE=4 SV=1;>tr|Q4DG59|Q4DG59_TRYCC Uncharacterized protein OS=Trypanosoma cruzi (strain CL Brener) GN=Tc00.1047053511693.10 PE=4 SV=1	351600000
SAQTSSQPHPLK	S	Acetyl (Protein N-term)	2951;2550	tr|Q4DVL6|Q4DVL6_TRYCC;tr|Q4DP05|Q4DP05_TRYCC	1	0	0	0	By MS/MS	By MS/MS	By MS/MS	By MS/MS	1	1	0	11	2	2	2	2	2	1	20356	20543	2	0.00027855	11779	sample44_2	113.95	82224	359710000	84277000	77507000	58465000	60483000			12075	2951;2550	11587	113764;113765;113766;113767;113768;113769;113770;113771;113772;113773;113774	86559;86560;86561;86562;86563;86564;86565;86566;86567;86568;86569	86565			11	Q4DVL6	>tr|Q4DVL6|Q4DVL6_TRYCC Uncharacterized protein OS=Trypanosoma cruzi (strain CL Brener) GN=Tc00.1047053508207.180 PE=4 SV=1	184830000
MMSDTAEAHSTTSQPLTEEHR	M	Acetyl (Protein N-term)	1420;175	tr|Q4D5Z5|Q4D5Z5_TRYCC;tr|Q4CLR4|Q4CLR4_TRYCC	1	0	0	0	By matching	By MS/MS	By MS/MS	By matching	2	1	0	9	2	2		2	2	1	42749	43143	3	0.562	30248	sample45_2	80733	59263	392770000	83814000	130630000	74391000	79479000			10056	1420;175	9663	96236;96237;96238;96239;96240;96241;96242;96243;96244	74012;74013;74014;74015;74016;74017;74018;74019;74020	74016			8	Q4D5Z5	>tr|Q4D5Z5|Q4D5Z5_TRYCC Uncharacterized protein OS=Trypanosoma cruzi (strain CL Brener) GN=Tc00.1047053511737.10 PE=4 SV=1	212050000
ADLLTMQQITELK	A	Acetyl (Protein N-term)	1764	tr|Q4DN66|Q4DN66_TRYCC;tr|Q4DB21|Q4DB21_TRYCC	1	0	0	0	By matching	By matching	By MS/MS	By MS/MS	3	1	0	12	2	2	2	2	2	2	107.49	107.46	2	1.19e-08	100584	sample47_2	138.02	105.54	400430000	82035000	114220000	28806000	46888000			265	1764	254	2933;2934;2935;2936;2937;2938;2939;2940;2941;2942;2943;2944	2274;2275;2276;2277;2278;2279;2280	2280			7	Q4DN66	>tr|Q4DN66|Q4DN66_TRYCC Calmodulin, putative OS=Trypanosoma cruzi (strain CL Brener) GN=Tc00.1047053511233.80 PE=4 SV=1;>tr|Q4DB21|Q4DB21_TRYCC Calmodulin, putative OS=Trypanosoma cruzi (strain CL Brener) GN=Tc00.1047053506963.90 PE=4 SV=1	93638000
AALEEVEAALNAR	A	Acetyl (Protein N-term)	159	tr|Q4CLF8|Q4CLF8_TRYCC	1	0	0	0	By MS/MS	By matching	By matching	By matching	1	1	0	6	1	2		2		1	54807	55333	2	0.012309	41271	sample45_2	63473	34.11	751870000	79617000	149130000	0	78589000			100	159	99	1139;1140;1141;1142;1143;1144	944;945	945			2	Q4CLF8	>tr|Q4CLF8|Q4CLF8_TRYCC Calpain-like cysteine peptidase, putative (Fragment) OS=Trypanosoma cruzi (strain CL Brener) GN=Tc00.1047053484311.10 PE=4 SV=1	731380000
SEQNGAHSLQAELER	S	Acetyl (Protein N-term)	3499	tr|Q4E4Q4|Q4E4Q4_TRYCC	1	0	0	0	By MS/MS	By MS/MS	By MS/MS	By MS/MS	1	1	0	12	2	3	2	1	2	2	47264	47724	2	6.33e-16	32998	sample43_2	142.4	109.21	698110000	76973000	113310000	175650000	296130000			12263	3499	11770	115565;115566;115567;115568;115569;115570;115571;115572;115573;115574;115575;115576	87858;87859;87860;87861;87862;87863;87864;87865;87866;87867;87868;87869;87870	87862			13	Q4E4Q4	>tr|Q4E4Q4|Q4E4Q4_TRYCC Uncharacterized protein OS=Trypanosoma cruzi (strain CL Brener) GN=Tc00.1047053508461.550 PE=4 SV=1	2265200000
MQVEVPSYGPADVLR	M	Acetyl (Protein N-term)	2822	tr|Q4DTF4|Q4DTF4_TRYCC;tr|Q4DHH8|Q4DHH8_TRYCC	1	0	0	0	By MS/MS	By MS/MS	By MS/MS	By MS/MS	1	1	0	11	2	2	2	2	1	2	102.27	102.39	2	0.636	83935	sample47_1	90561	64071	396040000	75897000	110810000	21121000	94641000			10139	2822	9743	96878;96879;96880;96881;96882;96883;96884;96885;96886;96887;96888	74476;74477;74478;74479;74480;74481;74482;74483;74484	74484			9	Q4DTF4	>tr|Q4DTF4|Q4DTF4_TRYCC Quinone oxidoreductase, putative OS=Trypanosoma cruzi (strain CL Brener) GN=Tc00.1047053510311.90 PE=4 SV=1;>tr|Q4DHH8|Q4DHH8_TRYCC Quinone oxidoreductase, putative OS=Trypanosoma cruzi (strain CL Brener) GN=Tc00.1047053510265.10 PE	938560000
ASEAGPYPNSPR	A	Acetyl (Protein N-term)	875	tr|Q4CY03|Q4CY03_TRYCC;tr|Q4DAR8|Q4DAR8_TRYCC	1	0	0	0	By MS/MS	By matching	By MS/MS	By matching	1	1	0	12	2	2	2	2	2	2	41782	42216	2	0.0048111	32074	sample46_2	63091	42884	372210000	73266000	75715000	53952000	72709000			1299	875	1238	13156;13157;13158;13159;13160;13161;13162;13163;13164;13165;13166;13167	10489;10490;10491;10492;10493;10494	10494			6	Q4CY03	>tr|Q4CY03|Q4CY03_TRYCC Uncharacterized protein OS=Trypanosoma cruzi (strain CL Brener) GN=Tc00.1047053503643.30 PE=4 SV=1;>tr|Q4DAR8|Q4DAR8_TRYCC Uncharacterized protein OS=Trypanosoma cruzi (strain CL Brener) GN=Tc00.1047053506485.100 PE=4 SV=1	392750000
SDAAVPPKK	S	Acetyl (Protein N-term)	699	tr|Q4CVA9|Q4CVA9_TRYCC	1	0	0	1	By MS/MS	By MS/MS	By MS/MS	By MS/MS	1	1	0	22	2	3	2	5	5	5	16439	16518	2	0.002545	8859	sample45_2	104.2	72.44	732590000	73189000	202900000	102730000	188690000			12134	699	11643	114340;114341;114342;114343;114344;114345;114346;114347;114348;114349;114350;114351;114352;114353;114354;114355;114356;114357;114358;114359;114360;114361	86970;86971;86972;86973;86974;86975;86976;86977;86978;86979;86980;86981;86982;86983;86984;86985;86986;86987;86988;86989;86990;86991;86992;86993;86994;86995;86996;86997;86998;86999;87000;87001;87002;87003;87004;87005	86996			36	Q4CVA9	>tr|Q4CVA9|Q4CVA9_TRYCC Histone H1, putative OS=Trypanosoma cruzi (strain CL Brener) GN=Tc00.1047053509837.40 PE=4 SV=1	1366500000
ASGGSVIGVK	A	Acetyl (Protein N-term)	1364	tr|Q4D579|Q4D579_TRYCC	1	0	0	0	By matching	By MS/MS	By MS/MS	By matching	2	1	0	12	2	2	2	2	2	2	46637	47088	1	0.011141	32530	sample43_2	101.54	49755	519080000	72318000	106820000	71858000	167160000			1320	1364	1259	13430;13431;13432;13433;13434;13435;13436;13437;13438;13439;13440;13441	10676;10677;10678;10679	10677			1	Q4D579	>tr|Q4D579|Q4D579_TRYCC Proteasome subunit beta OS=Trypanosoma cruzi (strain CL Brener) GN=Tc00.1047053510689.30 PE=3 SV=1	178830000
AEGTAAAAGALSELFIDEDKVHR	A	Acetyl (Protein N-term)	1600	tr|Q4D8M9|Q4D8M9_TRYCC	1	0	0	1	By MS/MS	By MS/MS	By MS/MS	By MS/MS	1	1	0	13	2	2	2	2	2	3	95518	95718	3	2.15e-21	87478	sample47_2	122.53	84321	425550000	72284000	96291000	80837000	92727000			365	1600	347	4030;4031;4032;4033;4034;4035;4036;4037;4038;4039;4040;4041;4042	3223;3224;3225;3226;3227;3228;3229;3230;3231;3232;3233;3234;3235;3236;3237;3238	3238			16	Q4D8M9	>tr|Q4D8M9|Q4D8M9_TRYCC Uncharacterized protein OS=Trypanosoma cruzi (strain CL Brener) GN=Tc00.1047053506221.70 PE=4 SV=1	220850000
ATFPELLRPLK	A	Acetyl (Protein N-term)	3517;283	tr|Q4E4V7|Q4E4V7_TRYCC;tr|Q4CNI1|Q4CNI1_TRYCC	1	0	0	1	By MS/MS	By MS/MS	By MS/MS	By MS/MS	1	1	0	11	2	2	2	1	2	2	86914	87.16	2	0.32	78091	sample46_2	126.19	93.94	4275000000	71715000	85303000	1531200000	2561100000			1414	3517;283	1353	14272;14273;14274;14275;14276;14277;14278;14279;14280;14281;14282	11304;11305;11306;11307;11308;11309;11310;11311;11312	11310			9	Q4E4V7	>tr|Q4E4V7|Q4E4V7_TRYCC Prostaglandin F2alpha synthase OS=Trypanosoma cruzi (strain CL Brener) GN=Tc00.1047053508461.80 PE=4 SV=1	25445000000
AEDKDAVSICALSEDPK	A	Acetyl (Protein N-term)	3028	tr|Q4DWU3|Q4DWU3_TRYCC	1	0	0	1	By MS/MS	By MS/MS	By MS/MS	By MS/MS	1	1	0	12	2	2	2	2	2	2	62035	62372	2	0.00176	46929	sample43_2	107.98	74.43	357920000	70590000	37530000	48860000	107910000			320	3028	306	3476;3477;3478;3479;3480;3481;3482;3483;3484;3485;3486;3487	2728;2729;2730;2731;2732;2733;2734;2735	2730			5	Q4DWU3	>tr|Q4DWU3|Q4DWU3_TRYCC 26S proteasome regulatory non-ATPase subunit, putative (Fragment) OS=Trypanosoma cruzi (strain CL Brener) GN=Tc00.1047053508409.9 PE=4 SV=1	127450000
TDIKYENGQPTFEGPTVVK	T	Acetyl (Protein N-term)	1022	tr|Q4D066|Q4D066_TRYCC	1	0	0	1	By MS/MS	By matching	By MS/MS	By MS/MS	1	1	0	15	4	1	3	2	2	3	66602	66943	2	5.14e-18	56543	sample47_2	137.89	113.09	346300000	70517000	34238000	68937000	110160000			13434	1022	12895	126545;126546;126547;126548;126549;126550;126551;126552;126553;126554;126555;126556;126557;126558;126559	96402;96403;96404;96405;96406;96407;96408;96409;96410;96411;96412;96413;96414;96415;96416;96417;96418	96418			17	Q4D066	>tr|Q4D066|Q4D066_TRYCC Calpain-like cysteine peptidase, putative OS=Trypanosoma cruzi (strain CL Brener) GN=Tc00.1047053508675.29 PE=4 SV=1	0
ATAQELQQQLEDLR	A	Acetyl (Protein N-term)	2977	tr|Q4DW35|Q4DW35_TRYCC	1	0	0	0	By MS/MS	By MS/MS	By MS/MS	By MS/MS	1	1	0	12	2	2	2	2	2	2	97629	97837	2	8.65e-27	83608	sample45_2	154.65	121.06	337210000	69637000	76817000	41098000	82792000			1386	2977	1325	14007;14008;14009;14010;14011;14012;14013;14014;14015;14016;14017;14018	11086;11087;11088;11089;11090;11091;11092;11093;11094;11095;11096;11097;11098;11099	11093			14	Q4DW35	>tr|Q4DW35|Q4DW35_TRYCC Uncharacterized protein OS=Trypanosoma cruzi (strain CL Brener) GN=Tc00.1047053507681.189 PE=4 SV=1	0
MHDSNQELCEPTIVGDFK	M	Acetyl (Protein N-term)	1025	tr|Q4D0A7|Q4D0A7_TRYCC;tr|Q4D3V0|Q4D3V0_TRYCC	1	0	0	0	By MS/MS	By MS/MS	By MS/MS	By MS/MS	1	1	0	12	2	2	2	2	2	2	75199	75558	2	2.65e-59	59860	sample43_2	171.04	137.72	565460000	66494000	108900000	76871000	222470000			9948	1025	9561	95390;95391;95392;95393;95394;95395;95396;95397;95398;95399;95400;95401	73392;73393;73394;73395;73396;73397;73398;73399;73400;73401;73402;73403;73404;73405;73406;73407;73408;73409;73410;73411;73412;73413;73414;73415;73416;73417;73418;73419	73400			28	Q4D0A7	>tr|Q4D0A7|Q4D0A7_TRYCC Mitogen-activated protein kinase OS=Trypanosoma cruzi (strain CL Brener) GN=Tc00.1047053509553.60 PE=3 SV=1;>tr|Q4CKS6|Q4CKS6_TRYCC Mitogen-activated protein kinase 3, putative (Fragment) OS=Trypanosoma cruzi (strain CL Brener) GN=T	357570000
SVSFSTLVQR	S	Acetyl (Protein N-term)	2594	tr|Q4DPR3|Q4DPR3_TRYCC;tr|Q4CWV6|Q4CWV6_TRYCC	1	0	0	0	By MS/MS	By MS/MS	By MS/MS	By MS/MS	1	1	0	14	2	3	3	3	1	2	83697	83984	2	0.146	64644	sample45_1	125.74	69478	386670000	65957000	67265000	36962000	75925000			13212	2594	12687	124531;124532;124533;124534;124535;124536;124537;124538;124539;124540;124541;124542;124543;124544	94713;94714;94715;94716;94717;94718;94719;94720;94721;94722;94723;94724	94721			12	Q4DPR3	>tr|Q4DPR3|Q4DPR3_TRYCC Mitochondrial processing peptidase, beta subunit, putative OS=Trypanosoma cruzi (strain CL Brener) GN=Tc00.1047053511181.50 PE=4 SV=1	6495500000
GETVFEFK	G	Acetyl (Protein N-term)	2737	tr|Q4DS34|Q4DS34_TRYCC;tr|Q4D6U6|Q4D6U6_TRYCC	1	0	0	0	By MS/MS	By MS/MS	By MS/MS	By matching	1	1	0	16	4	2	3	3	2	2	81722	82007	1;2	0.0028902	72825	sample46_2	113.26	67.92	342120000	64677000	87996000	28144000	87242000			5521	2737	5300	53913;53914;53915;53916;53917;53918;53919;53920;53921;53922;53923;53924;53925;53926;53927;53928	41876;41877;41878;41879;41880;41881	41881			5	Q4DS34	>tr|Q4DS34|Q4DS34_TRYCC Phosphoinositide-binding protein, putative OS=Trypanosoma cruzi (strain CL Brener) GN=Tc00.1047053510657.30 PE=4 SV=1;>tr|Q4D6U6|Q4D6U6_TRYCC Phosphoinositide-binding protein, putative OS=Trypanosoma cruzi (strain CL Brener) GN=Tc00	250080000
GDHELSDSEK	G	Acetyl (Protein N-term)	1350	tr|Q4D505|Q4D505_TRYCC	1	0	0	0	By MS/MS	By matching	By MS/MS	By MS/MS	1	1	0	12	2	2	2	2	2	2	17542	17675	2	0.0129	10072	sample47_2	143.5	97112	407460000	64547000	86411000	59544000	108340000			5397	1350	5181	52682;52683;52684;52685;52686;52687;52688;52689;52690;52691;52692;52693	40957;40958;40959;40960;40961;40962;40963;40964;40965	40965			8	Q4D505	>tr|Q4D505|Q4D505_TRYCC Eukaryotic peptide chain release factor subunit 1, putative (Fragment) OS=Trypanosoma cruzi (strain CL Brener) GN=Tc00.1047053503593.70 PE=4 SV=1	0
MEGFYGVEVASGQQVKPK	M	Acetyl (Protein N-term)	1161	tr|Q4D244|Q4D244_TRYCC;tr|Q4D245|Q4D245_TRYCC	1	0	0	1	By MS/MS	By MS/MS	By MS/MS	By MS/MS	1	1	0	10	2	2			4	2	74564	74939	2	7.09e-10	59160	sample47_1	115.2	104.08	495680000	61364000	54185000	164020000	216110000			9855	1161	9476	94642;94643;94644;94645;94646;94647;94648;94649;94650;94651	72831;72832;72833;72834;72835;72836;72837;72838;72839;72840;72841;72842;72843	72841			13	Q4D244	>tr|Q4D244|Q4D244_TRYCC Nucleolar RNA-binding protein, putative OS=Trypanosoma cruzi (strain CL Brener) GN=Tc00.1047053510859.17 PE=4 SV=1;>tr|Q4D245|Q4D245_TRYCC Nucleolar RNA-binding protein, putative OS=Trypanosoma cruzi (strain CL Brener) GN=Tc00.10470	621390000
MDVNCTLIECK	M	Acetyl (Protein N-term)	2590;2455;2648	tr|Q4DPP4|Q4DPP4_TRYCC;tr|Q4DLZ8|Q4DLZ8_TRYCC;tr|Q4DQM4|Q4DQM4_TRYCC	1	0	0	0	By matching	By MS/MS	By MS/MS	By MS/MS	2	1	0	12	2	2	2	2	2	2	79353	79645	2	0.00092723	70282	sample47_2	94122	69054	271030000	59278000	56531000	45778000	48714000			9817	2590;2455;2648	9446	94343;94344;94345;94346;94347;94348;94349;94350;94351;94352;94353;94354	72576;72577;72578;72579;72580;72581;72582;72583	72583			8	Q4DPP4	>tr|Q4DPP4|Q4DPP4_TRYCC Protein tyrosine phosphatase, putative OS=Trypanosoma cruzi (strain CL Brener) GN=Tc00.1047053506743.110 PE=4 SV=1	230240000
SGESVFNLIEPEVEVPPPPPR	S	Acetyl (Protein N-term)	2723	tr|Q4DRV2|Q4DRV2_TRYCC	1	0	0	0	By MS/MS	By MS/MS	By MS/MS	By MS/MS	1	1	0	17	4	2	3	3	2	3	109.34	109.31	2;3	3.23e-06	87220	sample42_1	96143	63012	242460000	56334000	31885000	34024000	46384000			12348	2723	11854	116462;116463;116464;116465;116466;116467;116468;116469;116470;116471;116472;116473;116474;116475;116476;116477;116478	88499;88500;88501;88502;88503;88504;88505;88506;88507;88508;88509;88510;88511;88512;88513;88514;88515;88516;88517;88518	88499			20	Q4DRV2	>tr|Q4DRV2|Q4DRV2_TRYCC Uncharacterized protein OS=Trypanosoma cruzi (strain CL Brener) GN=Tc00.1047053507669.190 PE=4 SV=1;>tr|Q4CYZ3|Q4CYZ3_TRYCC Uncharacterized protein (Fragment) OS=Trypanosoma cruzi (strain CL Brener) GN=Tc00.1047053509877.10 PE=4 SV=	185530000
MMSDTAEAHSTTSQPLTEEHRK	M	Acetyl (Protein N-term)	1420;175	tr|Q4D5Z5|Q4D5Z5_TRYCC;tr|Q4CLR4|Q4CLR4_TRYCC	1	0	0	1	By MS/MS	By MS/MS	By MS/MS	By MS/MS	1	1	0	11	3	2		2	2	2	32555	32.94	3	9.47e-19	20208	sample43_2	122.94	109	368600000	55120000	86268000	43596000	135690000			10057	1420;175	9664	96245;96246;96247;96248;96249;96250;96251;96252;96253;96254;96255	74021;74022;74023;74024;74025;74026;74027;74028;74029;74030;74031;74032;74033;74034;74035;74036;74037;74038;74039;74040	74028			20	Q4D5Z5	>tr|Q4D5Z5|Q4D5Z5_TRYCC Uncharacterized protein OS=Trypanosoma cruzi (strain CL Brener) GN=Tc00.1047053511737.10 PE=4 SV=1	212050000
MDFVLNTIQWLR	M	Acetyl (Protein N-term)	1384	tr|Q4DUK4|Q4DUK4_TRYCC;tr|Q4D5J7|Q4D5J7_TRYCC	1	0	0	0	By matching	By MS/MS	By MS/MS	By matching	2	1	0	7	2	2	1		2		112.45	112.43	2	0.00041394	98773	sample43_2	104.24	70194	336080000	54854000	97818000	176230000	0			9795	1384	9424	94216;94217;94218;94219;94220;94221;94222	72476;72477;72478;72479	72477			4	Q4DUK4	>tr|Q4DUK4|Q4DUK4_TRYCC Elongation of fatty acids protein OS=Trypanosoma cruzi (strain CL Brener) GN=Tc00.1047053511245.160 PE=3 SV=1;>tr|Q4D5J7|Q4D5J7_TRYCC Elongation of fatty acids protein OS=Trypanosoma cruzi (strain CL Brener) GN=Tc00.1047053510989.10	0
SFQEIGVAFVR	S	Acetyl (Protein N-term)	999	tr|Q4CZU2|Q4CZU2_TRYCC	1	0	0	0	By MS/MS	By MS/MS	By MS/MS	By MS/MS	1	1	0	18	4	4	2	1	4	3	103.12	103.22	1;2	2.26e-05	95475	sample46_2	136.96	136.96	235170000	54350000	71044000	47272000	33544000			12320	999	11826	116147;116148;116149;116150;116151;116152;116153;116154;116155;116156;116157;116158;116159;116160;116161;116162;116163;116164	88294;88295;88296;88297;88298;88299;88300;88301;88302;88303;88304;88305;88306;88307;88308;88309	88306			15	Q4CZU2	>tr|Q4CZU2|Q4CZU2_TRYCC Nuclear transport factor 2, putative OS=Trypanosoma cruzi (strain CL Brener) GN=Tc00.1047053509567.40 PE=4 SV=1	271910000
AYSFGDLR	A	Acetyl (Protein N-term)	3471	tr|Q4E4E9|Q4E4E9_TRYCC	1	0	0	0	By MS/MS	By MS/MS	By MS/MS	By MS/MS	1	1	0	9	2	1	1	2	2	1	77881	78156	2	0.0075648	64639	sample42_2	104.44	49826	165530000	53189000	29941000	16261000	24339000			1687	3471	1611	17173;17174;17175;17176;17177;17178;17179;17180;17181	13724;13725;13726;13727;13728;13729;13730	13724			7	Q4E4E9	>tr|Q4E4E9|Q4E4E9_TRYCC Tyrosine aminotransferase, putative OS=Trypanosoma cruzi (strain CL Brener) GN=Tc00.1047053510187.20 PE=4 SV=1	2486400000
GDHELSESEK	G	Acetyl (Protein N-term)	2564	tr|Q4DP89|Q4DP89_TRYCC	1	0	0	0	By MS/MS	By MS/MS	By MS/MS	By MS/MS	1	1	0	12	2	2	2	2	2	2	18041	18158	2	0.0368	9124	sample43_2	133.75	103.36	321390000	52106000	64624000	44344000	71239000			5398	2564	5182	52694;52695;52696;52697;52698;52699;52700;52701;52702;52703;52704;52705	40966;40967;40968;40969;40970;40971;40972;40973;40974;40975;40976	40969			11	Q4DP89	>tr|Q4DP89|Q4DP89_TRYCC Eukaryotic peptide chain release factor subunit 1, putative OS=Trypanosoma cruzi (strain CL Brener) GN=Tc00.1047053506127.110 PE=4 SV=1	675640000
AEDKDAVSICALSEDPKEK	A	Acetyl (Protein N-term)	3028	tr|Q4DWU3|Q4DWU3_TRYCC	1	0	0	2	By MS/MS	By matching	By MS/MS	By MS/MS	1	1	0	11	2	1	2	2	2	2	50928	51356	3	0.0014171	40897	sample46_2	72801	47899	371330000	48496000	34967000	66804000	120690000			321	3028	307	3488;3489;3490;3491;3492;3493;3494;3495;3496;3497;3498	2736;2737;2738;2739;2740;2741;2742;2743;2744;2745	2742			10	Q4DWU3	>tr|Q4DWU3|Q4DWU3_TRYCC 26S proteasome regulatory non-ATPase subunit, putative (Fragment) OS=Trypanosoma cruzi (strain CL Brener) GN=Tc00.1047053508409.9 PE=4 SV=1	127450000
MELVAELPGR	M	Acetyl (Protein N-term)	234	tr|Q4DPP7|Q4DPP7_TRYCC;tr|Q4CMT7|Q4CMT7_TRYCC	1	0	0	0	By MS/MS	By MS/MS	By MS/MS	By MS/MS	1	1	0	15	3	2	2	3	2	3	102.89	102.99	2	0.0044007	81374	sample42_1	84687	74379	238730000	44789000	59059000	23948000	51775000			9880	234	9497	94873;94874;94875;94876;94877;94878;94879;94880;94881;94882;94883;94884;94885;94886;94887	73024;73025;73026;73027;73028;73029;73030;73031;73032;73033;73034;73035	73024			12	Q4DPP7	>tr|Q4DPP7|Q4DPP7_TRYCC Uncharacterized protein OS=Trypanosoma cruzi (strain CL Brener) GN=Tc00.1047053506743.80 PE=4 SV=1;>tr|Q4CMT7|Q4CMT7_TRYCC Uncharacterized protein OS=Trypanosoma cruzi (strain CL Brener) GN=Tc00.1047053511927.30 PE=4 SV=1;>tr|Q4DLZ5	177700000
SSSSTPSVVSSVEAHAK	S	Acetyl (Protein N-term)	2695	tr|Q4DRE9|Q4DRE9_TRYCC	1	0	0	0	By MS/MS	By MS/MS	By MS/MS	By MS/MS	1	1	0	9	1	1	2	1	2	2	49926	50421	2	1.94E-05	37315	sample46_1	85362	54274	684430000	44110000	57486000	163180000	360300000			13018	2695	12497	122821;122822;122823;122824;122825;122826;122827;122828;122829	93525;93526;93527;93528;93529;93530;93531;93532;93533	93530			7	Q4DRE9	>tr|Q4DRE9|Q4DRE9_TRYCC Uncharacterized protein OS=Trypanosoma cruzi (strain CL Brener) GN=Tc00.1047053508547.180 PE=4 SV=1	287290000
AIIYPTLEDQEK	A	Acetyl (Protein N-term)	1057	tr|Q4DRI8|Q4DRI8_TRYCC;tr|Q4D0M5|Q4D0M5_TRYCC	1	0	0	0	By MS/MS	By matching	By matching	By matching	1	1	0	9	2	2	2	1	1	1	90454	90.71	2	0.0085947	70717	sample42_1	64.64	35096	160200000	43261000	43803000	13229000	28041000			737	1057	702	7688;7689;7690;7691;7692;7693;7694;7695;7696	6082;6083;6084;6085	6083			3	Q4DRI8	>tr|Q4DRI8|Q4DRI8_TRYCC Uncharacterized protein OS=Trypanosoma cruzi (strain CL Brener) GN=Tc00.1047053507491.119 PE=4 SV=1;>tr|Q4D0M5|Q4D0M5_TRYCC Uncharacterized protein OS=Trypanosoma cruzi (strain CL Brener) GN=Tc00.1047053509393.30 PE=4 SV=1	56133000
MENCGDGSSLEQSLLK	M	Acetyl (Protein N-term)	1741	tr|Q4DAU9|Q4DAU9_TRYCC	1	0	0	0	By MS/MS	By MS/MS	By MS/MS	By MS/MS	1	1	0	13	3	2	2	2	2	2	87352	87611	2	0.561	78758	sample47_2	97214	73579	221480000	43149000	46172000	37622000	55103000			9884	1741	9501	94902;94903;94904;94905;94906;94907;94908;94909;94910;94911;94912;94913;94914	73043;73044;73045;73046;73047;73048;73049;73050	73050			8	Q4DAU9	>tr|Q4DAU9|Q4DAU9_TRYCC Uracil phosphoribosyltransferase, putative OS=Trypanosoma cruzi (strain CL Brener) GN=Tc00.1047053507739.40 PE=4 SV=1	197820000
STPQTHPATLVDAR	S	Acetyl (Protein N-term)	786	tr|Q4CWL4|Q4CWL4_TRYCC	1	0	0	0	By MS/MS	By matching	By MS/MS	By MS/MS	1	1	0	12	2	2	2	2	2	2	39685	40111	2	0.0001712	28597	sample46_1	85.28	54375	300560000	42104000	52112000	46220000	93797000			13097	786	12574	123547;123548;123549;123550;123551;123552;123553;123554;123555;123556;123557;123558	94048;94049;94050	94049			3	Q4CWL4	>tr|Q4CWL4|Q4CWL4_TRYCC Uncharacterized protein OS=Trypanosoma cruzi (strain CL Brener) GN=Tc00.1047053506979.20 PE=3 SV=1	0
AFCIISESR	A	Acetyl (Protein N-term)	2498	tr|Q4DMU8|Q4DMU8_TRYCC	1	0	0	0	By MS/MS	By MS/MS	By MS/MS	By MS/MS	1	1	0	12	2	2	2	2	2	2	86297	86564	2	0.00068419	66297	sample45_1	123.86	92574	237620000	42064000	47623000	36205000	55584000			438	2498	418	4688;4689;4690;4691;4692;4693;4694;4695;4696;4697;4698;4699	3688;3689;3690;3691;3692;3693;3694;3695;3696;3697;3698;3699	3694			12	Q4DMU8	>tr|Q4DMU8|Q4DMU8_TRYCC Reticulon-like protein OS=Trypanosoma cruzi (strain CL Brener) GN=Tc00.1047053511517.37 PE=4 SV=1	1412000000
SQGEQTAPAASGGK	S	Acetyl (Protein N-term)	1342	tr|Q4D4W4|Q4D4W4_TRYCC	1	0	0	0	By MS/MS	By MS/MS	By MS/MS	By MS/MS	1	1	0	12	2	2	2	2	2	2	19082	19177	2	9.49e-09	10689	sample45_2	132.65	76233	384510000	40911000	77895000	64794000	48405000			12894	1342	12379	121723;121724;121725;121726;121727;121728;121729;121730;121731;121732;121733;121734	92631;92632;92633;92634;92635;92636;92637;92638;92639;92640;92641;92642;92643	92639			13	Q4D4W4	>tr|Q4D4W4|Q4D4W4_TRYCC Ubiquitin-fold modifier 1 OS=Trypanosoma cruzi (strain CL Brener) GN=Tc00.1047053507275.24 PE=3 SV=1	0
ACDLDETWVECMGEFK	A	Acetyl (Protein N-term)	2288	tr|Q4DJ45|Q4DJ45_TRYCC	1	0	0	0	By MS/MS	By MS/MS	By MS/MS	By MS/MS	1	1	0	12	2	2	2	2	2	2	107.98	107.95	2	5.93e-29	89372	sample47_1	169.92	166.98	255040000	40866000	51175000	51171000	54230000			189	2288	183	2075;2076;2077;2078;2079;2080;2081;2082;2083;2084;2085;2086	1643;1644;1645;1646;1647;1648;1649;1650;1651;1652;1653;1654;1655	1654			13	Q4DJ45	>tr|Q4DJ45|Q4DJ45_TRYCC Uncharacterized protein (Fragment) OS=Trypanosoma cruzi (strain CL Brener) GN=Tc00.1047053511755.119 PE=4 SV=1	897650000
ADEVPMTKR	A	Acetyl (Protein N-term)	1465	tr|Q4D6T8|Q4D6T8_TRYCC	1	0	0	1	By MS/MS	By matching	By matching	By matching	1	1	0	7	2	2	1	2			84.48	84745	2	0.042979	65484	sample42_1	56434	24216	104500000	38865000	35475000	0	0			239	1465	229	2667;2668;2669;2670;2671;2672;2673	2113	2113			1	Q4D6T8	>tr|Q4D6T8|Q4D6T8_TRYCC Universal minicircle sequence binding protein (UMSBP), putative OS=Trypanosoma cruzi (strain CL Brener) GN=Tc00.1047053507639.20 PE=4 SV=1	4459500000
AASTTDEKDAK	A	Acetyl (Protein N-term)	1555	tr|Q4D814|Q4D814_TRYCC;tr|Q4DLV5|Q4DLV5_TRYCC	1	0	0	1	By matching	By MS/MS	By MS/MS	By MS/MS	2	1	0	9	2	1	2	1	1	2	99768	10166	2	3.83e-11	5362	sample47_2	156.01	103.29	184530000	38175000	21153000	21790000	52462000			159	1555	154	1717;1718;1719;1720;1721;1722;1723;1724;1725	1373;1374;1375;1376;1377;1378	1378			6	Q4D814	>tr|Q4D814|Q4D814_TRYCC Uncharacterized protein OS=Trypanosoma cruzi (strain CL Brener) GN=Tc00.1047053510243.80 PE=4 SV=1;>tr|Q4DLV5|Q4DLV5_TRYCC Uncharacterized protein OS=Trypanosoma cruzi (strain CL Brener) GN=Tc00.1047053510575.140 PE=4 SV=1	0
SLAFDEYGRPFLLVK	S	Acetyl (Protein N-term)	3000	tr|Q4DWG6|Q4DWG6_TRYCC	1	0	0	1	By matching	By matching	By MS/MS	By MS/MS	3	1	0	8	2	2			2	2	102.52	102.63	2	1.26e-29	95007	sample47_2	160.78	119.28	832590000	36966000	54256000	232230000	509140000			12576	3000	12069	118890;118891;118892;118893;118894;118895;118896;118897	90434;90435;90436;90437;90438;90439;90440;90441	90441			8	Q4DWG6	>tr|Q4DWG6|Q4DWG6_TRYCC Chaperonin containing T-complex protein, putative OS=Trypanosoma cruzi (strain CL Brener) GN=Tc00.1047053511725.250 PE=3 SV=1	1951200000
MEENHANDNNNNNGETGEKPAVK	M	Acetyl (Protein N-term)	2783	tr|Q4DSS5|Q4DSS5_TRYCC	1	0	0	1	By matching	By MS/MS	By matching	By MS/MS	2	1	0	11	1	2	1	2	2	3	20885	21.05	3	1.17e-21	12628	sample47_2	119.72	85.55	282670000	36191000	92143000	39031000	60166000			9837	2783	9462	94517;94518;94519;94520;94521;94522;94523;94524;94525;94526;94527	72736;72737;72738	72738			3	Q4DSS5	>tr|Q4DSS5|Q4DSS5_TRYCC Small ubiquitin protein, putative OS=Trypanosoma cruzi (strain CL Brener) GN=Tc00.1047053507809.70 PE=4 SV=1	177430000
MQNIISFAEAAK	M	Acetyl (Protein N-term)	3073;2451	tr|Q4DXF7|Q4DXF7_TRYCC;tr|Q4DLY0|Q4DLY0_TRYCC	1	0	0	0	By matching	By MS/MS	By MS/MS	By MS/MS	2	1	0	10	2	2	1	1	2	2	107.22	107.19	2	4.82e-06	88614	sample47_1	130.19	103.48	224030000	34934000	41820000	49953000	87037000			10128	3073;2451	9732	96797;96798;96799;96800;96801;96802;96803;96804;96805;96806	74420;74421;74422;74423;74424;74425;74426	74425			7	Q4DXF7	>tr|Q4DXF7|Q4DXF7_TRYCC Cytochrome b5, putative (Fragment) OS=Trypanosoma cruzi (strain CL Brener) GN=Tc00.1047053510355.269 PE=4 SV=1	0
AVKSLEDR	A	Acetyl (Protein N-term)	1125	tr|Q4D1I9|Q4D1I9_TRYCC	1	0	0	1	By MS/MS	By matching	By matching	By matching	1	1	0	10	1	2	1	2	2	2	10731	11086	2	0.039539	5646	sample42_2	87696	12653	380320000	34548000	106470000	52891000	70466000			1578	1125	1508	16005;16006;16007;16008;16009;16010;16011;16012;16013;16014	12777	12777			1	Q4D1I9	>tr|Q4D1I9|Q4D1I9_TRYCC Peptidase T, putative (Fragment) OS=Trypanosoma cruzi (strain CL Brener) GN=Tc00.1047053508917.49 PE=4 SV=1	0
MFPYVEDYDGYAVK	M	Acetyl (Protein N-term)	2903	tr|Q4DUK6|Q4DUK6_TRYCC;tr|Q4DHY2|Q4DHY2_TRYCC	1	0	0	0	By matching	By matching	By MS/MS	By matching	3	1	0	11	2	2	1	2	2	2	107.14	107.11	2	0.0029956	100605	sample46_2	72891	58127	173970000	33941000	40041000	28230000	41842000			9914	2903	9528	95101;95102;95103;95104;95105;95106;95107;95108;95109;95110;95111	73171	73171			1	Q4DUK6	>tr|Q4DUK6|Q4DUK6_TRYCC Elongation of fatty acids protein OS=Trypanosoma cruzi (strain CL Brener) GN=Tc00.1047053511245.140 PE=3 SV=1;>tr|Q4DHY2|Q4DHY2_TRYCC Elongation of fatty acids protein OS=Trypanosoma cruzi (strain CL Brener) GN=Tc00.1047053506661.20	1808300000
MELLGDAEQLVAK	M	Acetyl (Protein N-term)	1534	tr|Q4D7R4|Q4D7R4_TRYCC;tr|Q4D526|Q4D526_TRYCC	1	0	0	0	By MS/MS	By MS/MS	By MS/MS	By MS/MS	1	1	0	12	2	2	2	2	2	2	111.03	111	2	2.36e-14	105490	sample47_2	145.81	98829	238520000	32851000	42720000	44484000	85502000			9873	1534	9491	94797;94798;94799;94800;94801;94802;94803;94804;94805;94806;94807;94808	72965;72966;72967;72968;72969;72970;72971;72972;72973;72974;72975;72976	72976			12	Q4D7R4	>tr|Q4D7R4|Q4D7R4_TRYCC Glutathione synthetase OS=Trypanosoma cruzi (strain CL Brener) GN=Tc00.1047053508865.10 PE=3 SV=1;>tr|Q4D526|Q4D526_TRYCC Glutathione synthetase OS=Trypanosoma cruzi (strain CL Brener) GN=Tc00.1047053506659.30 PE=3 SV=1	210310000
GVHEAEEVR	G	Acetyl (Protein N-term)	858	tr|Q4CXR7|Q4CXR7_TRYCC	1	0	0	0	By matching	By matching	By MS/MS	By MS/MS	3	1	0	8	2		2	1	2	1	23005	23334	2	0.032816	14100	sample47_1	68371	30095	97743000	32652000	0	21949000	0			6258	858	6009	61320;61321;61322;61323;61324;61325;61326;61327	47630;47631	47631			2	Q4CXR7	>tr|Q4CXR7|Q4CXR7_TRYCC Vacuolar ATP synthase subunit B, putative OS=Trypanosoma cruzi (strain CL Brener) GN=Tc00.1047053511209.10 PE=3 SV=1	0
GDSLIAQLEQDFR	G	Acetyl (Protein N-term)	3290	tr|Q4E121|Q4E121_TRYCC	1	0	0	0	By MS/MS	By MS/MS	By MS/MS	By MS/MS	1	1	0	12	2	2	2	2	2	2	111.73	111.7	2	0.0213	89117	sample45_1	112.42	82419	164140000	31269000	34651000	24322000	43348000			5422	3290	5202	52962;52963;52964;52965;52966;52967;52968;52969;52970;52971;52972;52973	41175;41176;41177;41178;41179;41180;41181;41182;41183;41184;41185;41186;41187;41188;41189	41184			15	Q4E121	>tr|Q4E121|Q4E121_TRYCC Uncharacterized protein OS=Trypanosoma cruzi (strain CL Brener) GN=Tc00.1047053506247.340 PE=4 SV=1	52233000
AEEGPGDQEMQQPSIHTYK	A	Acetyl (Protein N-term)	925	tr|Q4D102|Q4D102_TRYCC;tr|Q4CYN4|Q4CYN4_TRYCC	1	0	0	0	By MS/MS	By MS/MS	By MS/MS	By MS/MS	1	1	0	10	1	2	1	1	2	3	49432	50.01	2	1.22e-17	39585	sample46_2	136.61	108.63	266080000	30698000	92052000	43389000	62368000			332	925	318	3612;3613;3614;3615;3616;3617;3618;3619;3620;3621	2833;2834;2835;2836;2837;2838;2839;2840;2841;2842;2843;2844;2845;2846;2847;2848	2845			16	Q4D102	>tr|Q4D102|Q4D102_TRYCC Uncharacterized protein OS=Trypanosoma cruzi (strain CL Brener) GN=Tc00.1047053504017.20 PE=4 SV=1;>tr|Q4CYN4|Q4CYN4_TRYCC Uncharacterized protein OS=Trypanosoma cruzi (strain CL Brener) GN=Tc00.1047053511231.69 PE=4 SV=1	73399000
SSWDVSMSNHAGLVFNPIR	S	Acetyl (Protein N-term)	3470;717	tr|Q4E4E7|Q4E4E7_TRYCC;tr|Q4DPG7|Q4DPG7_TRYCC;tr|Q4CLF2|Q4CLF2_TRYCC;tr|Q4CVI0|Q4CVI0_TRYCC	1	0	0	0	By matching	By matching	By MS/MS	By MS/MS	3	1	0	24	2	1		1	3	17	108.16	108.13	2	0.00040242	88556	sample47_1	72793	45267	305200000	30372000	11731000	47258000	209910000			13036	3470;717	12515	123011;123012;123013;123014;123015;123016;123017;123018;123019;123020;123021;123022;123023;123024;123025;123026;123027;123028;123029;123030;123031;123032;123033;123034	93647;93648;93649;93650;93651;93652;93653;93654;93655;93656;93657;93658;93659;93660;93661;93662;93663	93649			16	Q4E4E7	>tr|Q4E4E7|Q4E4E7_TRYCC Tyrosine aminotransferase OS=Trypanosoma cruzi (strain CL Brener) GN=Tc00.1047053510187.30 PE=4 SV=1;>tr|Q4DPG7|Q4DPG7_TRYCC Tyrosine aminotransferase, putative (Fragment) OS=Trypanosoma cruzi (strain CL Brener) GN=Tc00.104705351056	10330000000
MESPINPAVWK	M	Acetyl (Protein N-term)	1477	tr|Q4D6Y1|Q4D6Y1_TRYCC	1	0	0	0	By MS/MS	By matching	By matching	By MS/MS	1	1	0	13	2	2	2	3	2	2	93342	93592	2	0.023991	75939	sample47_1	58172	26694	175900000	29011000	44719000	20155000	48858000			9892	1477	9509	94945;94946;94947;94948;94949;94950;94951;94952;94953;94954;94955;94956;94957	73069;73070;73071;73072;73073	73073			5	Q4D6Y1	>tr|Q4D6Y1|Q4D6Y1_TRYCC Uncharacterized protein OS=Trypanosoma cruzi (strain CL Brener) GN=Tc00.1047053508813.60 PE=4 SV=1	1105200000
MDFLDEAVIYPVTAFIR	M	Acetyl (Protein N-term)	1263	tr|Q4D3Z9|Q4D3Z9_TRYCC	1	0	0	0	By matching	By MS/MS	By MS/MS	By MS/MS	2	1	0	7	2	1		1	1	2	112.5	112.47	2	2.18e-07	107371	sample47_2	124.29	99368	166880000	28659000	18131000	33259000	83374000			9792	1263	9421	94204;94205;94206;94207;94208;94209;94210	72465;72466;72467;72468;72469	72469			5	Q4D3Z9	>tr|Q4D3Z9|Q4D3Z9_TRYCC Protein transport protein Sec61 gamma subunit, putative OS=Trypanosoma cruzi (strain CL Brener) GN=Tc00.1047053511865.54 PE=3 SV=1	0
SAEDPQDIKLELEK	S	Acetyl (Protein N-term)	557	tr|Q4CT35|Q4CT35_TRYCC	1	0	0	1	By matching	By MS/MS	By matching	By MS/MS	2	1	0	7	1	2	1		1	2	65436	65823	2	0.00016865	55396	sample47_2	115.68	79109	223640000	28085000	86988000	31856000	61293000			12012	557	11526	113259;113260;113261;113262;113263;113264;113265	86195;86196;86197;86198	86198			4	Q4CT35	>tr|Q4CT35|Q4CT35_TRYCC Ubiquinol-cytochrome-C-reductase, putative OS=Trypanosoma cruzi (strain CL Brener) GN=Tc00.1047053504575.15 PE=4 SV=1	53938000
STILDPQPPIDPAQK	S	Acetyl (Protein N-term)	3012	tr|Q4E545|Q4E545_TRYCC;tr|Q4DWJ1|Q4DWJ1_TRYCC	1	0	0	0	By MS/MS	By matching	By matching	By matching	1	1	0	6	2		1	2	1		86077	86252	2	0.0049205	66329	sample45_1	62055	36728	58142000	25906000	0	13322000	0			13080	3012	12557	123392;123393;123394;123395;123396;123397	93936;93937;93938	93938			3	Q4E545	>tr|Q4E545|Q4E545_TRYCC Mitochondrial import inner membrane translocase subunit Tim17, putative OS=Trypanosoma cruzi (strain CL Brener) GN=Tc00.1047053510359.260 PE=4 SV=1;>tr|Q4DWJ1|Q4DWJ1_TRYCC Mitochondrial import inner membrane translocase subunit Tim1	0
AAVINDFLR	A	Acetyl (Protein N-term)	2282	tr|Q4DM24|Q4DM24_TRYCC;tr|Q4DJ30|Q4DJ30_TRYCC	1	0	0	0	By MS/MS	By MS/MS	By MS/MS	By MS/MS	1	1	0	12	2	2	2	2	2	2	107	106.98	2	0.00054583	94404	sample42_2	126.07	91375	119200000	25674000	24541000	24863000	31492000			176	2282	170	1916;1917;1918;1919;1920;1921;1922;1923;1924;1925;1926;1927	1520;1521;1522;1523;1524;1525;1526;1527;1528;1529;1530;1531	1521			11	Q4DM24	>tr|Q4DM24|Q4DM24_TRYCC Acidocalcisomal exopolyphosphatase, putative OS=Trypanosoma cruzi (strain CL Brener) GN=Tc00.1047053511577.110 PE=4 SV=1;>tr|Q4DJ30|Q4DJ30_TRYCC Acidocalcisomal exopolyphosphatase, putative OS=Trypanosoma cruzi (strain CL Brener) GN	0
MEFLVADAER	M	Acetyl (Protein N-term)	2832	tr|Q4DTI9|Q4DTI9_TRYCC	1	0	0	0	By MS/MS	By MS/MS	By MS/MS	By MS/MS	1	1	0	11	2	1	2	2	2	2	106.46	106.42	2	0.314	87952	sample47_1	122.7	87158	76630000	24580000	0	16381000	24440000			9851	2832	9473	94599;94600;94601;94602;94603;94604;94605;94606;94607;94608;94609	72797;72798;72799;72800;72801;72802;72803;72804;72805;72806;72807	72806			11	Q4DTI9	>tr|Q4DTI9|Q4DTI9_TRYCC Uncharacterized protein OS=Trypanosoma cruzi (strain CL Brener) GN=Tc00.1047053507053.160 PE=4 SV=1	0
ASTLVAGTLSVLLPVGGVMGYR	A	Acetyl (Protein N-term)	1242	tr|Q4D3L3|Q4D3L3_TRYCC	1	0	0	0	By matching	By MS/MS	By matching	By MS/MS	2	1	0	9	2	1	2		3	1	112.36	112.34	2;3	4.04e-49	100236	sample44_2	147.25	119.73	206560000	24075000	56348000	72228000	33054000			1362	1242	1301	13774;13775;13776;13777;13778;13779;13780;13781;13782	10906;10907;10908	10907			2	Q4D3L3	>tr|Q4D3L3|Q4D3L3_TRYCC Uncharacterized protein OS=Trypanosoma cruzi (strain CL Brener) GN=Tc00.1047053510725.40 PE=4 SV=1	0
SALESVLQR	S	Acetyl (Protein N-term)	3441;2059	tr|Q4E3M4|Q4E3M4_TRYCC;tr|Q4DFU1|Q4DFU1_TRYCC	1	0	0	0	By matching	By MS/MS	By MS/MS	By MS/MS	2	1	0	8	1	1	2	1	2	1	82591	82841	2	0.0017434	73759	sample46_2	111.46	39842	134290000	22622000	0	45503000	0			12049	3441;2059	11561	113570;113571;113572;113573;113574;113575;113576;113577	86422;86423;86424;86425;86426;86427	86426			5	Q4E3M4	>tr|Q4E3M4|Q4E3M4_TRYCC Uncharacterized protein OS=Trypanosoma cruzi (strain CL Brener) GN=Tc00.1047053510101.380 PE=4 SV=1	480100000
ATHPENAQNSPVGGHAR	A	Acetyl (Protein N-term)	429	tr|Q4CR23|Q4CR23_TRYCC	1	0	0	0	By matching	By matching	By MS/MS	By MS/MS	3	1	0	12	2		1	3	2	4	17188	17207	2;3	7.43e-09	10031	sample47_2	128.82	89192	174310000	21466000	0	33204000	75971000			1425	429	1363	14352;14353;14354;14355;14356;14357;14358;14359;14360;14361;14362;14363	11371;11372;11373;11374;11375;11376;11377;11378;11379;11380;11381;11382;11383	11382			12	Q4CR23	>tr|Q4CR23|Q4CR23_TRYCC Uncharacterized protein OS=Trypanosoma cruzi (strain CL Brener) GN=Tc00.1047053504421.19 PE=4 SV=1	344980000
SVATKPFEGTVR	S	Acetyl (Protein N-term)	1315	tr|Q4D4L3|Q4D4L3_TRYCC;tr|Q4D5H3|Q4D5H3_TRYCC	1	0	0	1	By matching	By matching	By MS/MS	By MS/MS	3	1	0	9	1	2	1	1	2	2	44707	45191	2	0.001361	34129	sample47_2	99.5	51216	556590000	21401000	78970000	154700000	287280000			13128	1315	12604	123755;123756;123757;123758;123759;123760;123761;123762;123763	94153;94154;94155	94155			3	Q4D4L3	>tr|Q4D4L3|Q4D4L3_TRYCC Phosphatase-like protein, putative OS=Trypanosoma cruzi (strain CL Brener) GN=Tc00.1047053507837.60 PE=4 SV=1;>tr|Q4D5H3|Q4D5H3_TRYCC Phosphatase-like protein, putative OS=Trypanosoma cruzi (strain CL Brener) GN=Tc00.1047053508405.3	113460000
SDNHQLEYK	S	Acetyl (Protein N-term)	3554	tr|Q4E5H7|Q4E5H7_TRYCC	1	0	0	0	By matching	By MS/MS	By MS/MS	By matching	2	1	0	5	1	1		1	2		23867	24106	2	0.0097614	15534	sample46_2	82831	56767	137320000	21335000	39411000	45050000	0			12182	3554	11690	114787;114788;114789;114790;114791	87312;87313;87314;87315	87315			4	Q4E5H7	>tr|Q4E5H7|Q4E5H7_TRYCC ATP-dependent zinc metallopeptidase, putative OS=Trypanosoma cruzi (strain CL Brener) GN=Tc00.1047053511277.170 PE=3 SV=1	287420000
MEENHANDSNNNNGEAGEKPAVK	M	Acetyl (Protein N-term)	2255	tr|Q4DIR8|Q4DIR8_TRYCC	1	0	0	1	By matching	By MS/MS	By MS/MS	By matching	2	1	0	7	1	2		1	2	1	21.08	21281	3	5.92e-07	12851	sample46_1	101.05	82659	170170000	20558000	48750000	41169000	36464000			9840	2255	9463	94530;94531;94532;94533;94534;94535;94536	72741;72742	72742			2	Q4DIR8	>tr|Q4DIR8|Q4DIR8_TRYCC Small ubiquitin protein, putative OS=Trypanosoma cruzi (strain CL Brener) GN=Tc00.1047053511661.50 PE=4 SV=1	0
MEFDLSHFLK	M	Acetyl (Protein N-term)	2326	tr|Q4DJY0|Q4DJY0_TRYCC	1	0	0	0	By MS/MS	By MS/MS	By MS/MS	By MS/MS	1	1	0	10	2	3		1	2	2	95913	95797	2;3	0.000428	98052	sample47_2	150.1	115.41	219980000	20470000	83452000	29620000	72258000			9849	2326	9471	94581;94582;94583;94584;94585;94586;94587;94588;94589;94590	72781;72782;72783;72784;72785;72786;72787;72788;72789;72790;72791;72792	72792			11	Q4DJY0	>tr|Q4DJY0|Q4DJY0_TRYCC Uncharacterized protein OS=Trypanosoma cruzi (strain CL Brener) GN=Tc00.1047053510879.30 PE=4 SV=1	0
STSAPAAHYTIDTLR	S	Acetyl (Protein N-term)	3123	tr|Q4DYA2|Q4DYA2_TRYCC	1	0	0	0	By MS/MS	By MS/MS	By MS/MS	By matching	1	1	0	7	1	2	1	1	2		56155	56684	2	0.00017667	42789	sample46_1	81526	37765	161140000	20361000	70223000	38133000	0			13101	3123	12577	123569;123570;123571;123572;123573;123574;123575	94059;94060;94061;94062;94063	94063			5	Q4DYA2	>tr|Q4DYA2|Q4DYA2_TRYCC Uncharacterized protein OS=Trypanosoma cruzi (strain CL Brener) GN=Tc00.1047053511817.240 PE=4 SV=1	0
AAELAHIVR	A	Acetyl (Protein N-term)	1479	tr|Q4E1S3|Q4E1S3_TRYCC;tr|Q4D6Z2|Q4D6Z2_TRYCC	1	0	0	0	By matching	By MS/MS	By MS/MS	By MS/MS	2	1	0	8	1	2	1		2	2	61649	61986	2	0.0028794	50984	sample47_2	104.2	70112	67215000	19706000	16795000	30714000	0			56	1479	56	655;656;657;658;659;660;661;662	528;529;530;531;532;533	533			6	Q4E1S3	>tr|Q4E1S3|Q4E1S3_TRYCC U6 snRNA-associated Sm-like protein LSm7p OS=Trypanosoma cruzi (strain CL Brener) GN=Tc00.1047053506855.209 PE=4 SV=1;>tr|Q4D6Z2|Q4D6Z2_TRYCC U6 snRNA-associated Sm-like protein LSm7p OS=Trypanosoma cruzi (strain CL Brener) GN=Tc00.	0
STYPQHVVDAVANCNEK	S	Acetyl (Protein N-term)	3579	tr|Q4E675|Q4E675_TRYCC;tr|Q4CPK6|Q4CPK6_TRYCC	1	0	0	0	By MS/MS	By matching	By MS/MS	By MS/MS	1	1	0	6	1	1			2	2	58534	59018	2	6.32e-28	48436	sample46_2	145.52	123.72	286390000	18883000	15651000	74853000	177000000			13120	3579	12596	123707;123708;123709;123710;123711;123712	94128;94129;94130;94131;94132;94133	94131			6	Q4E675	>tr|Q4E675|Q4E675_TRYCC Uncharacterized protein OS=Trypanosoma cruzi (strain CL Brener) GN=Tc00.1047053508153.164 PE=4 SV=1;>tr|Q4CPK6|Q4CPK6_TRYCC Uncharacterized protein OS=Trypanosoma cruzi (strain CL Brener) GN=Tc00.1047053508183.20 PE=4 SV=1	80798000
MEFILDAFDSSASTLK	M	Acetyl (Protein N-term)	3158	tr|Q4DYQ2|Q4DYQ2_TRYCC	1	0	0	0	By MS/MS	By matching	By MS/MS	By MS/MS	1	1	0	8	1	2		1	2	2	112.42	112.38	2	4.95e-27	93593	sample47_1	135.23	88345	195400000	16442000	60096000	57120000	54493000			9850	3158	9472	94591;94592;94593;94594;94595;94596;94597;94598	72793;72794;72795;72796	72795			4	Q4DYQ2	>tr|Q4DYQ2|Q4DYQ2_TRYCC Uncharacterized protein OS=Trypanosoma cruzi (strain CL Brener) GN=Tc00.1047053507641.230 PE=4 SV=1	0
SGNQASAVPQGDDQR	S	Acetyl (Protein N-term)	2471;2994	tr|Q4DME9|Q4DME9_TRYCC;tr|Q4DWB1|Q4DWB1_TRYCC	1	0	0	0	By MS/MS	By matching	By matching	By MS/MS	1	1	0	10	1	1	2	2	2	2	30877	31183	2	0.00034569	19973	sample45_2	88768	71074	175310000	15288000	16974000	37954000	49423000			12384	2471;2994	11888	116768;116769;116770;116771;116772;116773;116774;116775;116776;116777	88736;88737;88738;88739;88740;88741	88739			6	Q4DME9	>tr|Q4DME9|Q4DME9_TRYCC Retrotransposon hot spot (RHS) protein, putative OS=Trypanosoma cruzi (strain CL Brener) GN=Tc00.1047053506443.150 PE=4 SV=1	2026800000
SFNLDDLFDTGSR	S	Acetyl (Protein N-term)	3553	tr|Q4E5H5|Q4E5H5_TRYCC	1	0	0	0	By MS/MS	By matching	By matching	By MS/MS	1	1	0	7	2		2	1		2	111.37	111.33	2	0.00028067	88785	sample45_1	89624	26533	80364000	13769000	0	0	33064000			12312	3553	11818	116094;116095;116096;116097;116098;116099;116100	88259;88260;88261;88262;88263;88264;88265;88266	88264			8	Q4E5H5	>tr|Q4E5H5|Q4E5H5_TRYCC Uncharacterized protein OS=Trypanosoma cruzi (strain CL Brener) GN=Tc00.1047053511277.180 PE=4 SV=1	112120000
SHEITENK	S	Acetyl (Protein N-term)	2236	tr|Q4DIB5|Q4DIB5_TRYCC	1	0	0	0	By matching	By matching	By MS/MS	By matching	3	1	0	8	1	1	1	2	2	1	12956	13618	2	0.0028865	6950	sample44_2	148.99	108.72	113540000	13465000	19121000	17896000	18270000			12445	2236	11948	117378;117379;117380;117381;117382;117383;117384;117385	89236;89237	89236			2	Q4DIB5	>tr|Q4DIB5|Q4DIB5_TRYCC Uncharacterized protein OS=Trypanosoma cruzi (strain CL Brener) GN=Tc00.1047053509455.114 PE=4 SV=1	113370000
MVIEYLNSADTQR	M	Acetyl (Protein N-term)	891	tr|Q4CY89|Q4CY89_TRYCC;tr|Q4CX84|Q4CX84_TRYCC	1	0	0	0	By matching	By matching	By matching	By MS/MS	4	1	0	5	1				2	2	105.26	105.22	2	0.0003276	98250	sample47_2	106.55	60828	104670000	12721000	0	33330000	58614000			10232	891	9833	97477;97478;97479;97480;97481	74864	74864			1	Q4CY89	>tr|Q4CY89|Q4CY89_TRYCC Uncharacterized protein OS=Trypanosoma cruzi (strain CL Brener) GN=Tc00.1047053508649.20 PE=4 SV=1;>tr|Q4CX84|Q4CX84_TRYCC Uncharacterized protein OS=Trypanosoma cruzi (strain CL Brener) GN=Tc00.1047053509499.38 PE=4 SV=1	124170000
MLTSQEVACQFIPAFFER	M	Acetyl (Protein N-term)	2657	tr|Q4DQQ3|Q4DQQ3_TRYCC;tr|Q4CWQ2|Q4CWQ2_TRYCC	1	0	0	0	By matching	By matching	By matching	By MS/MS	4	1	0	5	1	1			1	2	112.15	112.1	2	0.000737	93255	sample47_1	98.76	83519	677770000	10010000	10539000	94681000	562540000			10039	2657	9647	96107;96108;96109;96110;96111	73944;73945	73944			2	Q4DQQ3	>tr|Q4DQQ3|Q4DQQ3_TRYCC Uncharacterized protein OS=Trypanosoma cruzi (strain CL Brener) GN=Tc00.1047053509167.140 PE=4 SV=1	623530000
GEEENKNEEPNR	G	Acetyl (Protein N-term)	344	tr|Q4CPP1|Q4CPP1_TRYCC;tr|Q4CNG2|Q4CNG2_TRYCC	1	0	0	1	By MS/MS	By MS/MS	By MS/MS	By matching	1	1	0	7	1	1	1	1	2	1	11335	11368	2	1.11e-06	5110	sample46_1	143.55	115.99	59279000	9060900	9480500	23831000	6323700			5466	344	5245	53396;53397;53398;53399;53400;53401;53402	41511;41512;41513;41514;41515;41516	41515			6	Q4CPP1	>tr|Q4CPP1|Q4CPP1_TRYCC Kinesin, putative (Fragment) OS=Trypanosoma cruzi (strain CL Brener) GN=Tc00.1047053507929.10 PE=3 SV=1;>tr|Q4CNG2|Q4CNG2_TRYCC Kinesin, putative (Fragment) OS=Trypanosoma cruzi (strain CL Brener) GN=Tc00.1047053509045.29 PE=3 SV=1	75632000
SDDLGELELR	S	Acetyl (Protein N-term)	3042	tr|Q4DX16|Q4DX16_TRYCC	1	0	0	0	By MS/MS	By matching	By matching	By matching	1	1	0	2	1		1				84149	84324	2	0.039292	70750	sample42_2	58274	10.38	15699000	8995200	0	0	0			12148	3042	11657	114466;114467	87093	87093			1	Q4DX16	>tr|Q4DX16|Q4DX16_TRYCC Acetyltransferase, putative OS=Trypanosoma cruzi (strain CL Brener) GN=Tc00.1047053508831.120 PE=4 SV=1	168910000
ASHGPVKDIER	A	Acetyl (Protein N-term)	3570	tr|Q4E620|Q4E620_TRYCC;tr|Q4CV69|Q4CV69_TRYCC	1	0	0	1	By matching	By MS/MS	By MS/MS	By matching	2	1	0	10	1	2		3	2	2	19782	20007	2	0.027444	10684	sample43_2	65695	24005	110380000	7476700	22405000	22511000	40937000			1326	3570	1265	13497;13498;13499;13500;13501;13502;13503;13504;13505;13506	10715;10716;10717	10715			3	Q4E620	>tr|Q4E620|Q4E620_TRYCC Elongation initiation factor 2 alpha subunit, putative OS=Trypanosoma cruzi (strain CL Brener) GN=Tc00.1047053508153.730 PE=4 SV=1;>tr|Q4CV69|Q4CV69_TRYCC Elongation initiation factor 2 alpha subunit, putative (Fragment) OS=Trypanos	705620000
SSSEFFTDIFEEEAR	S	Acetyl (Protein N-term)	1488	tr|Q4DXT0|Q4DXT0_TRYCC;tr|Q4D727|Q4D727_TRYCC	1	0	0	0	By MS/MS	By matching	By MS/MS	By matching	1	1	0	6	2		2	1	1		109.89	109.87	2	0.476	87831	sample42_1	95.57	69747	37245000	6783900	0	11908000	0			13016	1488	12495	122806;122807;122808;122809;122810;122811	93518;93519;93520;93521;93522	93518			5	Q4DXT0	>tr|Q4DXT0|Q4DXT0_TRYCC Uncharacterized protein OS=Trypanosoma cruzi (strain CL Brener) GN=Tc00.1047053510719.280 PE=4 SV=1;>tr|Q4D727|Q4D727_TRYCC Uncharacterized protein OS=Trypanosoma cruzi (strain CL Brener) GN=Tc00.1047053506275.40 PE=4 SV=1	0
AIAWMDSYTR	A	Acetyl (Protein N-term)	2902	tr|Q4DUK5|Q4DUK5_TRYCC;tr|Q4DHY3|Q4DHY3_TRYCC	1	0	0	0	By MS/MS	By MS/MS	By matching	By matching	1	1	0	6	1	1			2	2	101.51	101.61	2	0.028233	85907	sample43_2	65719	44882	45866000	6397200	0	11764000	27705000			682	2902	652	7057;7058;7059;7060;7061;7062	5558;5559	5559			2	Q4DUK5	>tr|Q4DUK5|Q4DUK5_TRYCC Elongation of fatty acids protein OS=Trypanosoma cruzi (strain CL Brener) GN=Tc00.1047053511245.150 PE=3 SV=1;>tr|Q4DHY3|Q4DHY3_TRYCC Elongation of fatty acids protein OS=Trypanosoma cruzi (strain CL Brener) GN=Tc00.1047053506661.10	121500000
ASGVPATFAAGCFWGTER	A	Acetyl (Protein N-term)	546	tr|Q4CSX7|Q4CSX7_TRYCC	1	0	0	0	By matching	By matching	By matching	By MS/MS	4	1	0	5	1		1		2	1	104.51	104.55	2	0.005679	86084	sample47_1	53453	22364	52154000	4437600	0	26218000	18736000			1325	546	1264	13492;13493;13494;13495;13496	10714	10714			1	Q4CSX7	>tr|Q4CSX7|Q4CSX7_TRYCC Peptide methionine sulfoxide reductase, putative OS=Trypanosoma cruzi (strain CL Brener) GN=Tc00.1047053510855.10 PE=3 SV=1	1349900000
AALVHLPDPFVTLPFR	A	Acetyl (Protein N-term)	1351	tr|Q4D509|Q4D509_TRYCC	1	0	0	0	By matching	By matching	By MS/MS	By MS/MS	3	1	0	3					1	2	108.64	108.58	2	0.000533	102263	sample46_2	121.24	97338	53741000	0	0	9136700	44605000			109	1351	107	1225;1226;1227	991;992;993;994	992			4	Q4D509	>tr|Q4D509|Q4D509_TRYCC Uncharacterized protein OS=Trypanosoma cruzi (strain CL Brener) GN=Tc00.1047053503593.30 PE=4 SV=1	253870000
AALVHLPDQFVTLPFR	A	Acetyl (Protein N-term)	2563	tr|Q4DP85|Q4DP85_TRYCC	1	0	0	0	By matching	By matching	By matching	By MS/MS	4	1	0	4					2	2	107.1	107.05	2	0.011291	88512	sample47_1	58885	45372	66819000	0	0	26477000	40341000			110	2563	108	1228;1229;1230;1231	995	995			0	Q4DP85	>tr|Q4DP85|Q4DP85_TRYCC Uncharacterized protein OS=Trypanosoma cruzi (strain CL Brener) GN=Tc00.1047053506127.150 PE=4 SV=1	0
ADGVIAHEEVLR	A	Acetyl (Protein N-term)	1441	tr|Q4DIY6|Q4DIY6_TRYCC;tr|Q4D6F4|Q4D6F4_TRYCC	1	0	0	0	By matching	By MS/MS	By MS/MS	By MS/MS	2	1	0	6		2	1		1	2	58941	59472	2	0.00045449	48401	sample47_2	101.56	65903	124210000	0	32593000	20235000	60155000			248	1441	238	2738;2739;2740;2741;2742;2743	2148;2149;2150;2151;2152;2153	2153			4	Q4DIY6	>tr|Q4DIY6|Q4DIY6_TRYCC Uncharacterized protein OS=Trypanosoma cruzi (strain CL Brener) GN=Tc00.1047053511445.80 PE=4 SV=1;>tr|Q4D6F4|Q4D6F4_TRYCC Uncharacterized protein OS=Trypanosoma cruzi (strain CL Brener) GN=Tc00.1047053510799.18 PE=4 SV=1	0
ADNAMTR	A	Acetyl (Protein N-term)	1607	tr|Q4D8U6|Q4D8U6_TRYCC	1	0	0	0	By matching	By matching	By MS/MS	By matching	3	1	0	1					1		24632	25183	2	0.03199	16406	sample46_2	82241	21837	31762000	0	0	31762000	0			273	1607	262	3012	2321	2321			1	Q4D8U6	>tr|Q4D8U6|Q4D8U6_TRYCC Universal minicircle sequence binding protein (UMSBP) OS=Trypanosoma cruzi (strain CL Brener) GN=Tc00.1047053503781.80 PE=4 SV=1	426960000
AEHLLEQLR	A	Acetyl (Protein N-term)	1321	tr|Q4D4P8|Q4D4P8_TRYCC;tr|Q4CUR5|Q4CUR5_TRYCC	1	0	0	0	By matching	By matching	By matching	By MS/MS	4	1	0	4					2	2	71913	72388	2	0.0060281	56857	sample47_1	95483	55425	254220000	0	0	94318000	159900000			370	1321	352	4055;4056;4057;4058	3245;3246	3245			2	Q4D4P8	>tr|Q4D4P8|Q4D4P8_TRYCC Uncharacterized protein OS=Trypanosoma cruzi (strain CL Brener) GN=Tc00.1047053506229.64 PE=4 SV=1;>tr|Q4CUR5|Q4CUR5_TRYCC Uncharacterized protein OS=Trypanosoma cruzi (strain CL Brener) GN=Tc00.1047053511571.20 PE=4 SV=1	0
AELLTPK	A	Acetyl (Protein N-term)	3341	tr|Q4E1W2|Q4E1W2_TRYCC	1	0	0	0	By matching	By matching	By MS/MS	By MS/MS	3	1	0	5				2	2	1	53538	54059	2	0.023725	39864	sample45_2	92.47	19681	45846000	0	0	14982000	12654000			379	3341	361	4117;4118;4119;4120;4121	3282;3283;3284	3282			2	Q4E1W2	>tr|Q4E1W2|Q4E1W2_TRYCC Uncharacterized protein OS=Trypanosoma cruzi (strain CL Brener) GN=Tc00.1047053507993.160 PE=1 SV=1;>tr|Q4E5D4|Q4E5D4_TRYCC Uncharacterized protein OS=Trypanosoma cruzi (strain CL Brener) GN=Tc00.1047053511277.600 PE=4 SV=1	0
AFAENSHDVIVSCLSK	A	Acetyl (Protein N-term)	1084	tr|Q4D0V8|Q4D0V8_TRYCC	1	0	0	0	By matching	By matching	By MS/MS	By MS/MS	3	1	0	4		1			2	1	71923	72448	2	0.00507	62446	sample47_2	116.61	77353	126770000	0	23210000	63392000	40168000			434	1084	415	4620;4621;4622;4623	3623;3624;3625;3626;3627	3627			5	Q4D0V8	>tr|Q4D0V8|Q4D0V8_TRYCC Uncharacterized protein (Fragment) OS=Trypanosoma cruzi (strain CL Brener) GN=Tc00.1047053511041.4 PE=4 SV=1	0
AIISSFVAFQR	A	Acetyl (Protein N-term)	1562	tr|Q4DPK8|Q4DPK8_TRYCC;tr|Q4D837|Q4D837_TRYCC	1	0	0	0	By matching	By matching	By matching	By MS/MS	4	1	0	1						1	109	108.95	2	0.0249	103078	sample47_2	62694	31346	0	0	0	0	0			734	1562	699	7669	6073	6073			1	Q4DPK8	>tr|Q4DPK8|Q4DPK8_TRYCC Vesicle-associated membrane protein, putative OS=Trypanosoma cruzi (strain CL Brener) GN=Tc00.1047053507801.179 PE=3 SV=1;>tr|Q4D837|Q4D837_TRYCC Vesicle-associated membrane protein (VAMP), putative OS=Trypanosoma cruzi (strain CL B	123940000
AILPHGFIEAIHASPLR	A	Acetyl (Protein N-term)	2734	tr|Q4DS12|Q4DS12_TRYCC	1	0	0	0	By MS/MS	By matching	By MS/MS	By MS/MS	1	1	0	4	1				2	1	87417	87716	3	0.00016876	70340	sample46_1	74133	56891	79894000	0	0	52933000	26962000			745	2734	710	7779;7780;7781;7782	6165;6166;6167;6168;6169	6166			5	Q4DS12	>tr|Q4DS12|Q4DS12_TRYCC Uncharacterized protein OS=Trypanosoma cruzi (strain CL Brener) GN=Tc00.1047053507949.60 PE=4 SV=1	0
ASAFDEITR	A	Acetyl (Protein N-term)	278	tr|Q4CNH0|Q4CNH0_TRYCC;tr|Q4DCA6|Q4DCA6_TRYCC	1	0	0	0	By matching	By matching	By matching	By MS/MS	4	1	0	2				1		1	74721	75196	2	0.00045784	56620	sample45_1	108.43	53.45	0	0	0	0	0			1282	278	1221	13042;13043	10407;10408	10407			2	Q4CNH0	>tr|Q4CNH0|Q4CNH0_TRYCC Calmodulin, putative (Fragment) OS=Trypanosoma cruzi (strain CL Brener) GN=Tc00.1047053504075.3 PE=4 SV=1;>tr|Q4DCA6|Q4DCA6_TRYCC Calmodulin, putative OS=Trypanosoma cruzi (strain CL Brener) GN=Tc00.1047053506933.89 PE=4 SV=1	0
ASALDTLAEDVQETLKR	A	Acetyl (Protein N-term)	1356	tr|Q4E3R3|Q4E3R3_TRYCC;tr|Q4D532|Q4D532_TRYCC	1	0	0	1	By matching	By MS/MS	By matching	By MS/MS	2	1	0	4		1		1		2	107.45	107.4	2	0.00153	88923	sample47_1	103.67	62975	29018000	0	0	0	24535000			1286	1356	1225	13061;13062;13063;13064	10423;10424;10425	10424			3	Q4E3R3	>tr|Q4E3R3|Q4E3R3_TRYCC Uncharacterized protein OS=Trypanosoma cruzi (strain CL Brener) GN=Tc00.1047053506401.310 PE=4 SV=1;>tr|Q4D532|Q4D532_TRYCC Uncharacterized protein OS=Trypanosoma cruzi (strain CL Brener) GN=Tc00.1047053510835.30 PE=4 SV=1	0
ASVFYILDSK	A	Acetyl (Protein N-term)	2664	tr|Q4DX10|Q4DX10_TRYCC;tr|Q4DQU4|Q4DQU4_TRYCC	1	0	0	0	By matching	By matching	By MS/MS	By MS/MS	3	1	0	4					2	2	108.06	108.01	2	0.0784	89440	sample47_1	133.42	115.52	29162000	0	0	17318000	11844000			1368	2664	1307	13826;13827;13828;13829	10930;10931;10932;10933	10932			4	Q4DX10	>tr|Q4DX10|Q4DX10_TRYCC Mu-adaptin 1, putative OS=Trypanosoma cruzi (strain CL Brener) GN=Tc00.1047053510533.40 PE=3 SV=1;>tr|Q4DQU4|Q4DQU4_TRYCC Mu-adaptin 1, putative OS=Trypanosoma cruzi (strain CL Brener) GN=Tc00.1047053511821.30 PE=3 SV=1	260390000
ATAAVALAPTADAAGSVLEPLLDK	A	Acetyl (Protein N-term)	3415	tr|Q4E342|Q4E342_TRYCC	1	0	0	0	By matching	By matching	By MS/MS	By MS/MS	3	1	0	6					2	4	110.8	110.74	2;3	0.0029864	91987	sample47_1	54.12	42712	112370000	0	0	21447000	90923000			1374	3415	1313	13878;13879;13880;13881;13882;13883	10971;10972;10973;10974;10975	10972			3	Q4E342	>tr|Q4E342|Q4E342_TRYCC Proteasome regulatory non-ATPase subunit 6, putative OS=Trypanosoma cruzi (strain CL Brener) GN=Tc00.1047053508741.300 PE=4 SV=1	344540000
ATHPENAQNSPMGGHAR	A	Acetyl (Protein N-term)	489	tr|Q4CS08|Q4CS08_TRYCC	1	0	0	0	By matching	By MS/MS	By matching	By matching	2	1	0	5		1	1	2		1	17781	18032	3	0.0021366	9899	sample45_2	63546	44872	55473000	0	17544000	0	11813000			1424	489	1362	14347;14348;14349;14350;14351	11368;11369;11370	11370			3	Q4CS08	>tr|Q4CS08|Q4CS08_TRYCC Uncharacterized protein OS=Trypanosoma cruzi (strain CL Brener) GN=Tc00.1047053503943.14 PE=4 SV=1	0
AVVQTHCFNWMDHDGTR	A	Acetyl (Protein N-term)	2493	tr|Q4DMP7|Q4DMP7_TRYCC;tr|Q4CP72|Q4CP72_TRYCC	1	0	0	0	By matching	By matching	By MS/MS	By MS/MS	3	1	0	7					3	4	62702	63177	2;3	0.0581	48553	sample47_1	97713	75.94	680510000	0	0	178940000	501570000			1633	2493	1560	16599;16600;16601;16602;16603;16604;16605	13276;13277;13278;13279;13280;13281;13282	13279			7	Q4DMP7	>tr|Q4DMP7|Q4DMP7_TRYCC Uncharacterized protein OS=Trypanosoma cruzi (strain CL Brener) GN=Tc00.1047053508899.54 PE=4 SV=1;>tr|Q4CP72|Q4CP72_TRYCC Uncharacterized protein (Fragment) OS=Trypanosoma cruzi (strain CL Brener) GN=Tc00.1047053511363.4 PE=4 SV=1	1204800000
AYNTPAWNEEFGVLK	A	Acetyl (Protein N-term)	2291	tr|Q4DJ63|Q4DJ63_TRYCC	1	0	0	0	By matching	By matching	By matching	By MS/MS	4	1	0	4			1		1	2	101.56	101.65	2	0.0018544	93899	sample47_2	72321	30326	62551000	0	0	12497000	43934000			1680	2291	1604	17110;17111;17112;17113	13652	13652			1	Q4DJ63	>tr|Q4DJ63|Q4DJ63_TRYCC Uncharacterized protein OS=Trypanosoma cruzi (strain CL Brener) GN=Tc00.1047053505183.84 PE=4 SV=1	0
GDVEQIVEKEETDIQANVLAIPTFEAMGLK	G	Acetyl (Protein N-term)	218	tr|Q4CMK2|Q4CMK2_TRYCC;tr|Q4D8X3|Q4D8X3_TRYCC	1	0	0	1	By matching	By matching	By matching	By MS/MS	4	1	0	2					1	1	111.92	111.89	3	0.00060625	106566	sample47_2	71295	48.6	26513000	0	0	12351000	14162000			5432	218	5212	53042;53043	41236	41236			1	Q4CMK2	>tr|Q4CMK2|Q4CMK2_TRYCC ATP-dependent DEAD/H RNA helicase, putative (Fragment) OS=Trypanosoma cruzi (strain CL Brener) GN=Tc00.1047053511199.9 PE=4 SV=1;>tr|Q4D8X3|Q4D8X3_TRYCC ATP-dependent DEAD/H RNA helicase, putative OS=Trypanosoma cruzi (strain CL Bre	0
GVDLTGVQK	G	Acetyl (Protein N-term)	106	sp|Q4DZP2|RL18_TRYCC	1	0	0	0	By matching	By MS/MS	By matching	By matching	2	1	0	2		1			1		21658	21832	2	0.012082	11924	sample43_2	80455	75754	611950000	0	351910000	260040000	0			6233	106	5984	61137;61138	47528	47528			1	Q4DZP2	>sp|Q4DZP2|RL18_TRYCC 60S ribosomal protein L18 OS=Trypanosoma cruzi (strain CL Brener) GN=RPL18 PE=1 SV=1;>tr|Q4DHK0|Q4DHK0_TRYCC 60S ribosomal protein L18, putative OS=Trypanosoma cruzi (strain CL Brener) GN=Tc00.1047053506181.50 PE=4 SV=1;>tr|Q4CSL2|Q4C	2457600000
MAEEVSKR	M	Acetyl (Protein N-term)	2836	tr|Q4DTJ8|Q4DTJ8_TRYCC	1	0	0	1	By matching	By matching	By matching	By MS/MS	4	1	0	1						1	19288	19437	2	0.020768	11138	sample47_2	77741	93582	220910000	0	0	0	220910000			9752	2836	9384	93925	72258	72258			1	Q4DTJ8	>tr|Q4DTJ8|Q4DTJ8_TRYCC Geranylgeranyl transferase type II beta subunit, putative OS=Trypanosoma cruzi (strain CL Brener) GN=Tc00.1047053507053.70 PE=4 SV=1	0
MAKEYPILVVPCK	M	Acetyl (Protein N-term)	1935	tr|Q4DL08|Q4DL08_TRYCC;tr|Q4DDN3|Q4DDN3_TRYCC	1	0	0	1	By matching	By matching	By MS/MS	By matching	3	1	0	1					1		88.76	89159	3	0.044176	71587	sample46_1	43501	11838	0	0	0	0	0			9757	1935	9389	93964	72288	72288			1	Q4DL08	>tr|Q4DL08|Q4DL08_TRYCC Queuine tRNA-ribosyltransferase accessory subunit 2 OS=Trypanosoma cruzi (strain CL Brener) GN=Tc00.1047053511649.90 PE=3 SV=1;>tr|Q4DDN3|Q4DDN3_TRYCC Queuine tRNA-ribosyltransferase accessory subunit 2 OS=Trypanosoma cruzi (strain	0
MDAFNPISEAQR	M	Acetyl (Protein N-term)	714	tr|Q4CVG3|Q4CVG3_TRYCC	1	0	0	0	By matching	By matching	By MS/MS	By matching	3	1	0	4		1		1	2		90968	91306	2	0.011864	73668	sample46_1	61532	25758	48212000	0	25348000	16801000	0			9783	714	9412	94119;94120;94121;94122	72399	72399			1	Q4CVG3	>tr|Q4CVG3|Q4CVG3_TRYCC 1,2-dihydroxy-3-keto-5-methylthiopentene dioxygenase homolog OS=Trypanosoma cruzi (strain CL Brener) GN=Tc00.1047053507873.60 PE=3 SV=1	184940000
MDFLHHVQGIVVLNELGGR	M	Acetyl (Protein N-term)	1855	tr|Q4DEQ7|Q4DEQ7_TRYCC;tr|Q4DCI9|Q4DCI9_TRYCC	1	0	0	0	By matching	By matching	By MS/MS	By MS/MS	3	1	0	4					2	2	104.18	104.25	3	1.93e-06	85786	sample47_1	103.87	78679	103570000	0	0	41312000	62254000			9793	1855	9422	94211;94212;94213;94214	72470;72471;72472;72473;72474	72472			5	Q4DEQ7	>tr|Q4DEQ7|Q4DEQ7_TRYCC Coatomer zeta subunit, putative OS=Trypanosoma cruzi (strain CL Brener) GN=Tc00.1047053506295.90 PE=4 SV=1;>tr|Q4DCI9|Q4DCI9_TRYCC Coatomer zeta subunit, putative OS=Trypanosoma cruzi (strain CL Brener) GN=Tc00.1047053511469.30 PE=4	0
MDFVEVAPEAICSTSHSR	M	Acetyl (Protein N-term)	2306	tr|Q4E3I1|Q4E3I1_TRYCC;tr|Q4DJG6|Q4DJG6_TRYCC	1	0	0	0	By matching	By matching	By matching	By MS/MS	4	1	0	1						1	90098	90348	2	0.498	81886	sample47_2	90872	55784	29597000	0	0	0	29597000			9794	2306	9423	94215	72475	72475			1	Q4E3I1	>tr|Q4E3I1|Q4E3I1_TRYCC Uncharacterized protein OS=Trypanosoma cruzi (strain CL Brener) GN=Tc00.1047053510329.320 PE=4 SV=1;>tr|Q4DJG6|Q4DJG6_TRYCC Uncharacterized protein OS=Trypanosoma cruzi (strain CL Brener) GN=Tc00.1047053507257.110 PE=4 SV=1	0
MDLDAFLNK	M	Acetyl (Protein N-term)	2901	tr|Q4DUJ9|Q4DUJ9_TRYCC;tr|Q4D5J2|Q4D5J2_TRYCC	1	0	0	0	By matching	By matching	By matching	By MS/MS	4	1	0	2						2	107.1	107	2	0.0010404	88538	sample47_1	119.68	96361	6798600	0	0	0	6798600			9800	2901	9429	94258;94259	72506;72507	72506			2	Q4DUJ9	>tr|Q4DUJ9|Q4DUJ9_TRYCC Uncharacterized protein OS=Trypanosoma cruzi (strain CL Brener) GN=Tc00.1047053511245.210 PE=4 SV=1;>tr|Q4D5J2|Q4D5J2_TRYCC Uncharacterized protein OS=Trypanosoma cruzi (strain CL Brener) GN=Tc00.1047053510989.60 PE=4 SV=1	0
MDLDAFLNKK	M	Acetyl (Protein N-term)	2901	tr|Q4DUJ9|Q4DUJ9_TRYCC;tr|Q4D5J2|Q4D5J2_TRYCC	1	0	0	1	By matching	By matching	By MS/MS	By matching	3	1	0	3					1	2	86546	86813	2	0.017511	78118	sample46_2	82029	46487	147000000	0	0	29039000	117960000			9801	2901	9430	94260;94261;94262	72508	72508			0	Q4DUJ9	>tr|Q4DUJ9|Q4DUJ9_TRYCC Uncharacterized protein OS=Trypanosoma cruzi (strain CL Brener) GN=Tc00.1047053511245.210 PE=4 SV=1;>tr|Q4D5J2|Q4D5J2_TRYCC Uncharacterized protein OS=Trypanosoma cruzi (strain CL Brener) GN=Tc00.1047053510989.60 PE=4 SV=1	0
MDSAGVNATQATCGAQSK	M	Acetyl (Protein N-term)	1758	tr|Q4DB00|Q4DB00_TRYCC	1	0	0	0	By matching	By matching	By MS/MS	By matching	3	1	0	1					1		50539	51.09	2	0.0058216	40498	sample46_2	65265	35275	0	0	0	0	0			9813	1758	9442	94330	72563	72563			1	Q4DB00	>tr|Q4DB00|Q4DB00_TRYCC Uncharacterized protein OS=Trypanosoma cruzi (strain CL Brener) GN=Tc00.1047053510087.80 PE=4 SV=1	0
MDSIDQFLETVSK	M	Acetyl (Protein N-term)	1329	tr|Q4D4S7|Q4D4S7_TRYCC;tr|Q4E243|Q4E243_TRYCC	1	0	0	0	By matching	By matching	By matching	By MS/MS	4	1	0	1						1	112.26	112.16	2	0.00034187	93368	sample47_1	94717	62278	51350000	0	0	0	51350000			9814	1329	9443	94331	72564	72564			1	Q4D4S7	>tr|Q4D4S7|Q4D4S7_TRYCC Serine/threonine-protein phosphatase OS=Trypanosoma cruzi (strain CL Brener) GN=Tc00.1047053511021.10 PE=3 SV=1;>tr|Q4E243|Q4E243_TRYCC Serine/threonine-protein phosphatase (Fragment) OS=Trypanosoma cruzi (strain CL Brener) GN=Tc00.	248590000
MDVAFDLYTAVIPVDR	M	Acetyl (Protein N-term)	125	tr|Q4CPV2|Q4CPV2_TRYCC;tr|Q4CKJ7|Q4CKJ7_TRYCC	1	0	0	0	By MS/MS	By MS/MS	By matching	By matching	1	1	0	2	1	1					112.34	112.31	2	3.38e-06	98656	sample43_2	114.01	72318	0	0	0	0	0			9816	125	9445	94341;94342	72574;72575	72575			2	Q4CPV2	>tr|Q4CPV2|Q4CPV2_TRYCC Lathosterol oxidase, putative OS=Trypanosoma cruzi (strain CL Brener) GN=Tc00.1047053507853.10 PE=3 SV=1;>tr|Q4CKJ7|Q4CKJ7_TRYCC Lathosterol oxidase, putative OS=Trypanosoma cruzi (strain CL Brener) GN=Tc00.1047053473111.10 PE=3 SV=	0
MEEAGGGRPTGPSATK	M	Acetyl (Protein N-term)	1712	tr|Q4DAG7|Q4DAG7_TRYCC	1	0	0	1	By MS/MS	By MS/MS	By matching	By MS/MS	1	1	0	7	1	3			1	2	28931	29241	2	0.00023423	18864	sample47_1	82755	23639	131560000	0	64732000	18003000	48824000			9833	1712	9459	94489;94490;94491;94492;94493;94494;94495	72698;72699;72700	72700			3	Q4DAG7	>tr|Q4DAG7|Q4DAG7_TRYCC Uncharacterized protein OS=Trypanosoma cruzi (strain CL Brener) GN=Tc00.1047053507559.60 PE=4 SV=1;>tr|Q4DZ12|Q4DZ12_TRYCC Uncharacterized protein OS=Trypanosoma cruzi (strain CL Brener) GN=Tc00.1047053510303.70 PE=4 SV=1	0
MEESEPQKEPVNYIDVK	M	Acetyl (Protein N-term)	3142	tr|Q4DYI7|Q4DYI7_TRYCC	1	0	0	1	By matching	By MS/MS	By matching	By MS/MS	2	1	0	6		1	1	2		2	63356	63839	2	0.0016371	46739	sample45_1	76051	48525	96291000	0	0	0	73432000			9846	3142	9468	94566;94567;94568;94569;94570;94571	72768;72769;72770;72771;72772;72773;72774	72770			7	Q4DYI7	>tr|Q4DYI7|Q4DYI7_TRYCC Uncharacterized protein OS=Trypanosoma cruzi (strain CL Brener) GN=Tc00.1047053511367.50 PE=4 SV=1	0
MEFDLLHFLK	M	Acetyl (Protein N-term)	1457	tr|Q4D6P0|Q4D6P0_TRYCC	1	0	0	0	By matching	By MS/MS	By MS/MS	By MS/MS	2	1	0	6		2			2	2	108.69	108.65	2	9.88e-13	102636	sample47_2	175.93	83883	145010000	0	27502000	38205000	79305000			9848	1457	9470	94575;94576;94577;94578;94579;94580	72776;72777;72778;72779;72780	72780			5	Q4D6P0	>tr|Q4D6P0|Q4D6P0_TRYCC Uncharacterized protein OS=Trypanosoma cruzi (strain CL Brener) GN=Tc00.1047053504013.90 PE=4 SV=1	173010000
MENLAENALLR	M	Acetyl (Protein N-term)	569	tr|Q4CT88|Q4CT88_TRYCC	1	0	0	0	By matching	By matching	By MS/MS	By MS/MS	3	1	0	3				1	1	1	98.33	98429	2	0.016643	90442	sample47_2	67519	29994	12102000	0	0	7993800	0			9887	569	9504	94920;94921;94922	73053;73054	73054			2	Q4CT88	>tr|Q4CT88|Q4CT88_TRYCC ATP binding protein-like protein, putative OS=Trypanosoma cruzi (strain CL Brener) GN=Tc00.1047053509069.20 PE=4 SV=1;>tr|Q4E252|Q4E252_TRYCC ATP binding protein-like protein, putative OS=Trypanosoma cruzi (strain CL Brener) GN=Tc00	90844000
MENLTVEEAR	M	Acetyl (Protein N-term)	2670;3154	tr|Q4DQY7|Q4DQY7_TRYCC;tr|Q4DYN2|Q4DYN2_TRYCC	1	0	0	0	By matching	By matching	By MS/MS	By matching	3	1	0	4					2	2	69216	69692	1	0.030178	59458	sample46_2	82287	37205	213010000	0	0	49782000	163230000			9888	2670;3154	9505	94923;94924;94925;94926	73055	73055			1	Q4DQY7	>tr|Q4DQY7|Q4DQY7_TRYCC Acetyl-coenzyme A synthetase OS=Trypanosoma cruzi (strain CL Brener) GN=Tc00.1047053509331.30 PE=3 SV=1	1603500000
MESHADTGK	M	Acetyl (Protein N-term)	3288	tr|Q4E0Z3|Q4E0Z3_TRYCC	1	0	0	0	By matching	By matching	By MS/MS	By matching	3	1	0	1					1		12479	13981	2	0.00446	6565	sample46_1	90827	67808	0	0	0	0	0			9891	3288	9508	94944	73068	73068			1	Q4E0Z3	>tr|Q4E0Z3|Q4E0Z3_TRYCC Uncharacterized protein OS=Trypanosoma cruzi (strain CL Brener) GN=Tc00.1047053508277.40 PE=4 SV=1;>tr|Q4CMV4|Q4CMV4_TRYCC Uncharacterized protein (Fragment) OS=Trypanosoma cruzi (strain CL Brener) GN=Tc00.1047053503543.20 PE=4 SV=1	102490000
METAPHNIQTER	M	Acetyl (Protein N-term)	2746	tr|Q4DS85|Q4DS85_TRYCC;tr|Q4DP31|Q4DP31_TRYCC	1	0	0	0	By matching	By matching	By matching	By MS/MS	4	1	0	2					1	1	36417	36893	2	0.0036219	25074	sample47_1	73.36	42502	32866000	0	0	7927000	24939000			9894	2746	9511	94963;94964	73077	73077			1	Q4DS85	>tr|Q4DS85|Q4DS85_TRYCC Uncharacterized protein OS=Trypanosoma cruzi (strain CL Brener) GN=Tc00.1047053510759.100 PE=4 SV=1;>tr|Q4DP31|Q4DP31_TRYCC Uncharacterized protein OS=Trypanosoma cruzi (strain CL Brener) GN=Tc00.1047053506999.120 PE=4 SV=1	0
MEVYLDATECYLK	M	Acetyl (Protein N-term)	1208	tr|Q4D321|Q4D321_TRYCC	1	0	0	0	By MS/MS	By matching	By MS/MS	By matching	1	1	0	9	1	1	1	2	3	1	109.01	109	2	0.0022987	86934	sample42_1	79614	51647	60166000	0	3909300	8512300	19358000			9901	1208	9517	95031;95032;95033;95034;95035;95036;95037;95038;95039	73117;73118;73119;73120;73121	73117			5	Q4D321	>tr|Q4D321|Q4D321_TRYCC Elongation of fatty acids protein OS=Trypanosoma cruzi (strain CL Brener) GN=Tc00.1047053509539.30 PE=3 SV=1	0
MFDALSALVETASAK	M	Acetyl (Protein N-term)	1337	tr|Q4D4V0|Q4D4V0_TRYCC;tr|Q4D6R0|Q4D6R0_TRYCC	1	0	0	0	By matching	By matching	By MS/MS	By MS/MS	3	1	0	3					2	1	112.39	112.36	2	4.72e-34	107178	sample47_2	171.08	149.83	80321000	0	0	22554000	57767000			9903	1337	9519	95049;95050;95051	73128;73129	73129			2	Q4D4V0	>tr|Q4D4V0|Q4D4V0_TRYCC Uncharacterized protein OS=Trypanosoma cruzi (strain CL Brener) GN=Tc00.1047053511523.60 PE=4 SV=1;>tr|Q4D6R0|Q4D6R0_TRYCC Uncharacterized protein OS=Trypanosoma cruzi (strain CL Brener) GN=Tc00.1047053511733.50 PE=4 SV=1	0
MFFEGACAK	M	Acetyl (Protein N-term)	1097;604	tr|Q4CTR7|Q4CTR7_TRYCC;tr|Q4D123|Q4D123_TRYCC	1	0	0	0	By matching	By matching	By MS/MS	By MS/MS	3	1	0	3					1	2	85.95	86333	2	0.0074051	69298	sample46_1	89047	77789	52818000	0	0	10537000	42282000			9907	604;1097	9523	95060;95061;95062	73133;73134	73133			2	Q4CTR7	>tr|Q4CTR7|Q4CTR7_TRYCC Malate dehydrogenase OS=Trypanosoma cruzi (strain CL Brener) GN=Tc00.1047053506937.10 PE=3 SV=1	0
MFHGFPDVQIAPR	M	Acetyl (Protein N-term)	2764	tr|Q4E3S5|Q4E3S5_TRYCC;tr|Q4DSJ1|Q4DSJ1_TRYCC	1	0	0	0	By matching	By matching	By matching	By MS/MS	4	1	0	4					2	2	88725	89025	2	0.019258	71870	sample47_1	55176	30302	118480000	0	0	33292000	85188000			9908	2764	9524	95063;95064;95065;95066	73135	73135			1	Q4E3S5	>tr|Q4E3S5|Q4E3S5_TRYCC Uncharacterized protein OS=Trypanosoma cruzi (strain CL Brener) GN=Tc00.1047053506401.180 PE=4 SV=1;>tr|Q4DSJ1|Q4DSJ1_TRYCC Uncharacterized protein OS=Trypanosoma cruzi (strain CL Brener) GN=Tc00.1047053508543.100 PE=4 SV=1	0
MFSLGVAER	M	Acetyl (Protein N-term)	1075	tr|Q4D0T3|Q4D0T3_TRYCC	1	0	0	0	By matching	By matching	By matching	By MS/MS	4	1	0	1						1	93911	94.16	2	0.031163	85951	sample47_2	68626	43067	0	0	0	0	0			9916	1075	9530	95113	73173	73173			1	Q4D0T3	>tr|Q4D0T3|Q4D0T3_TRYCC Pumilio/PUF RNA binding protein 6, putative OS=Trypanosoma cruzi (strain CL Brener) GN=Tc00.1047053510125.10 PE=4 SV=1	648150000
MFTDSAAHTSLAFEDALPDEPHATVK	M	Acetyl (Protein N-term)	474	tr|Q4DFS9|Q4DFS9_TRYCC;tr|Q4CRV4|Q4CRV4_TRYCC	1	0	0	0	By matching	By matching	By MS/MS	By matching	3	1	0	1					1		85359	85758	3	0.002674	68623	sample46_1	43035	20635	10864000	0	0	10864000	0			9917	474	9531	95114	73174	73174			1	Q4DFS9	>tr|Q4DFS9|Q4DFS9_TRYCC Cleavage and polyadenylation specificity factor 30 kDa subunit, putative OS=Trypanosoma cruzi (strain CL Brener) GN=Tc00.1047053511555.40 PE=4 SV=1;>tr|Q4CRV4|Q4CRV4_TRYCC Cleavage and polyadenylation specificity factor 30 kDa subun	0
MHADNSSVIPPCGSK	M	Acetyl (Protein N-term)	2348	tr|Q4DK73|Q4DK73_TRYCC;tr|Q4DSC2|Q4DSC2_TRYCC	1	0	0	0	By matching	By MS/MS	By MS/MS	By MS/MS	2	1	0	8		3		1	2	2	43227	43.69	2	0.006459	30715	sample45_2	71354	50697	60372000	0	39163000	7055100	14154000			9945	2348	9558	95357;95358;95359;95360;95361;95362;95363;95364	73362;73363;73364;73365;73366	73363			5	Q4DK73	>tr|Q4DK73|Q4DK73_TRYCC Uncharacterized protein OS=Trypanosoma cruzi (strain CL Brener) GN=Tc00.1047053509601.120 PE=4 SV=1;>tr|Q4DSC2|Q4DSC2_TRYCC Uncharacterized protein OS=Trypanosoma cruzi (strain CL Brener) GN=Tc00.1047053509767.120 PE=4 SV=1	644390000
MIADFESVLR	M	Acetyl (Protein N-term)	1464	tr|Q4D8U7|Q4D8U7_TRYCC;tr|Q4D6T6|Q4D6T6_TRYCC	1	0	0	0	By matching	By matching	By matching	By MS/MS	4	1	0	1						1	110.05	109.95	2	0.249	91300	sample47_1	112.83	70498	0	0	0	0	0			9953	1464	9566	95454	73458	73458			1	Q4D8U7	>tr|Q4D8U7|Q4D8U7_TRYCC Proteasome subunit beta type OS=Trypanosoma cruzi (strain CL Brener) GN=Tc00.1047053503781.70 PE=3 SV=1;>tr|Q4D6T6|Q4D6T6_TRYCC Proteasome subunit beta type OS=Trypanosoma cruzi (strain CL Brener) GN=Tc00.1047053507639.40 PE=3 SV=1	259310000
MIASATPHAGCETATAK	M	Acetyl (Protein N-term)	3228	tr|Q4E002|Q4E002_TRYCC;tr|Q4D504|Q4D504_TRYCC	1	0	0	0	By matching	By matching	By matching	By MS/MS	4	1	0	4						4	42829	43.23	2	2.21e-18	30727	sample47_1	123.76	98793	33338000	0	0	0	33338000			9954	3228	9567	95455;95456;95457;95458	73459;73460;73461;73462	73459			4	Q4E002	>tr|Q4E002|Q4E002_TRYCC Ras-related protein rab-5, putative OS=Trypanosoma cruzi (strain CL Brener) GN=Tc00.1047053509805.60 PE=4 SV=1;>tr|Q4D504|Q4D504_TRYCC Ras-related protein rab-5, putative (Fragment) OS=Trypanosoma cruzi (strain CL Brener) GN=Tc00.10	0
MIIEDAIVDEVPTVR	M	Acetyl (Protein N-term)	2295	tr|Q4DJ83|Q4DJ83_TRYCC	1	0	0	0	By matching	By MS/MS	By MS/MS	By matching	2	1	0	3		2			1		110.95	110.91	2	0.00018556	96966	sample43_2	95067	68476	280520000	0	216050000	64465000	0			9962	2295	9575	95533;95534;95535	73526;73527;73528	73527			2	Q4DJ83	>tr|Q4DJ83|Q4DJ83_TRYCC Uncharacterized protein OS=Trypanosoma cruzi (strain CL Brener) GN=Tc00.1047053507515.40 PE=4 SV=1	143510000
MISSQQAMVHVVSR	M	Acetyl (Protein N-term)	2099	tr|Q4DRC3|Q4DRC3_TRYCC;tr|Q4DGA2|Q4DGA2_TRYCC	1	0	0	0	By matching	By matching	By matching	By MS/MS	4	1	0	1						1	63743	64393	2	0.127	53726	sample47_2	106.76	78474	0	0	0	0	0			9976	2099	9586	95666	73629	73629			1	Q4DRC3	>tr|Q4DRC3|Q4DRC3_TRYCC Hypoxanthine-guanine phosphoribosyltransferase, putative OS=Trypanosoma cruzi (strain CL Brener) GN=Tc00.1047053509693.80 PE=4 SV=1;>tr|Q4DGA2|Q4DGA2_TRYCC Hypoxanthine-guanine phosphoribosyltransferase, putative OS=Trypanosoma cruz	981920000
MIVLNGISEEQKK	M	Acetyl (Protein N-term)	1919	tr|Q4DDB3|Q4DDB3_TRYCC;tr|Q4D0G6|Q4D0G6_TRYCC	1	0	0	1	By matching	By matching	By MS/MS	By MS/MS	3	1	0	4					2	2	75.95	76363	2	0.0047063	60525	sample47_1	66004	30927	64837000	0	0	36251000	28587000			9980	1919	9590	95688;95689;95690;95691	73634;73635;73636	73636			3	Q4DDB3	>tr|Q4DDB3|Q4DDB3_TRYCC Uncharacterized protein OS=Trypanosoma cruzi (strain CL Brener) GN=Tc00.1047053505193.100 PE=4 SV=1;>tr|Q4D0G6|Q4D0G6_TRYCC Uncharacterized protein OS=Trypanosoma cruzi (strain CL Brener) GN=Tc00.1047053506467.29 PE=4 SV=1	588760000
MLEEAVLDGK	M	Acetyl (Protein N-term)	2569	tr|Q4DPA1|Q4DPA1_TRYCC	1	0	0	0	By MS/MS	By matching	By matching	By MS/MS	1	1	0	3	1					2	92811	93111	2	0.0018091	84579	sample47_2	113.44	58361	13394000	0	0	0	13394000			10002	2569	9611	95883;95884;95885	73770;73771;73772	73772			3	Q4DPA1	>tr|Q4DPA1|Q4DPA1_TRYCC Uncharacterized protein OS=Trypanosoma cruzi (strain CL Brener) GN=Tc00.1047053509647.170 PE=4 SV=1	0
MLELPPVASLK	M	Acetyl (Protein N-term)	1256	tr|Q4D3W3|Q4D3W3_TRYCC;tr|Q4DGV1|Q4DGV1_TRYCC	1	0	0	0	By matching	By matching	By MS/MS	By MS/MS	3	1	0	4					2	2	107.03	106.98	2	0.0029895	100530	sample47_2	85813	85813	45855000	0	0	10469000	35387000			10005	1256	9613	95900;95901;95902;95903	73784;73785;73786;73787	73787			4	Q4D3W3	>tr|Q4D3W3|Q4D3W3_TRYCC Aspartate carbamoyltransferase, putative OS=Trypanosoma cruzi (strain CL Brener) GN=Tc00.1047053508375.30 PE=1 SV=1;>tr|Q4DGV1|Q4DGV1_TRYCC Aspartate carbamoyltransferase, putative OS=Trypanosoma cruzi (strain CL Brener) GN=Tc00.104	1177800000
MLHEIPLHDASASAAER	M	Acetyl (Protein N-term)	827	tr|Q4CX95|Q4CX95_TRYCC	1	0	0	0	By matching	By matching	By matching	By MS/MS	4	1	0	4					2	2	57376	57927	3	0.00015006	46761	sample47_2	85493	53879	148070000	0	0	46646000	101420000			10013	827	9621	95957;95958;95959;95960	73813;73814;73815	73815			3	Q4CX95	>tr|Q4CX95|Q4CX95_TRYCC Uncharacterized protein OS=Trypanosoma cruzi (strain CL Brener) GN=Tc00.1047053507583.40 PE=4 SV=1	0
MLMEWLR	M	Acetyl (Protein N-term)	3037	tr|Q4E4G9|Q4E4G9_TRYCC;tr|Q4DWX7|Q4DWX7_TRYCC	1	0	0	0	By matching	By matching	By matching	By MS/MS	4	1	0	2						2	111.53	111.46	2	0.014578	106066	sample47_2	128.86	72.14	15837000	0	0	0	15837000			10022	3037	9630	96031;96032	73879;73880	73879			2	Q4E4G9	>tr|Q4E4G9|Q4E4G9_TRYCC Uncharacterized protein OS=Trypanosoma cruzi (strain CL Brener) GN=Tc00.1047053506885.340 PE=4 SV=1;>tr|Q4DWX7|Q4DWX7_TRYCC Uncharacterized protein OS=Trypanosoma cruzi (strain CL Brener) GN=Tc00.1047053510729.80 PE=4 SV=1	700430000
MLNNELANLVDQQK	M	Acetyl (Protein N-term)	2462	tr|Q4DM75|Q4DM75_TRYCC	1	0	0	0	By matching	By matching	By MS/MS	By MS/MS	3	1	0	4					2	2	105.14	105.09	2	6.14e-18	86062	sample46_1	132.65	89.35	241500000	0	0	68043000	173460000			10028	2462	9636	96072;96073;96074;96075	73913;73914;73915;73916;73917	73913			5	Q4DM75	>tr|Q4DM75|Q4DM75_TRYCC Protein translation factor SUI1 homolog, putative OS=Trypanosoma cruzi (strain CL Brener) GN=Tc00.1047053508515.20 PE=4 SV=1	0
MLVELTPEK	M	Acetyl (Protein N-term)	2300	tr|Q4DJA3|Q4DJA3_TRYCC;tr|Q4DVH0|Q4DVH0_TRYCC	1	0	0	0	By matching	By matching	By MS/MS	By MS/MS	3	1	0	3		1			1	1	92.77	93.12	2	0.0048951	84673	sample47_2	99013	99013	10442000	0	3377100	0	7065200			10044	2300	9651	96169;96170;96171	73982;73983	73983			2	Q4DJA3	>tr|Q4DJA3|Q4DJA3_TRYCC Uncharacterized protein OS=Trypanosoma cruzi (strain CL Brener) GN=Tc00.1047053511815.10 PE=4 SV=1;>tr|Q4DVH0|Q4DVH0_TRYCC Uncharacterized protein OS=Trypanosoma cruzi (strain CL Brener) GN=Tc00.1047053506859.30 PE=4 SV=1	0
MLVINVAADIFNSK	M	Acetyl (Protein N-term)	2714;3454	tr|Q4E418|Q4E418_TRYCC;tr|Q4DRP5|Q4DRP5_TRYCC	1	0	0	0	By matching	By matching	By MS/MS	By MS/MS	3	1	0	6		1	1	2	1	1	112.42	112.38	2	0.0117	89770	sample45_1	109.79	89557	106800000	0	16699000	40196000	24868000			10045	3454;2714	9652	96172;96173;96174;96175;96176;96177	73984;73985;73986;73987	73984			3	Q4E418	>tr|Q4E418|Q4E418_TRYCC Uncharacterized protein OS=Trypanosoma cruzi (strain CL Brener) GN=Tc00.1047053511127.20 PE=4 SV=1	67896000
MMEGFYGVEVASGQQVKPK	M	Acetyl (Protein N-term)	1161	tr|Q4D244|Q4D244_TRYCC;tr|Q4D245|Q4D245_TRYCC	1	0	0	1	By matching	By matching	By MS/MS	By MS/MS	3	1	0	10					5	5	83468	83874	2	0.0587	74073	sample47_2	90872	69918	259040000	0	0	91368000	167670000			10050	1161	9657	96193;96194;96195;96196;96197;96198;96199;96200;96201;96202	73992;73993;73994;73995;73996;73997;73998;73999;74000;74001;74002;74003;74004	74003			11	Q4D244	>tr|Q4D244|Q4D244_TRYCC Nucleolar RNA-binding protein, putative OS=Trypanosoma cruzi (strain CL Brener) GN=Tc00.1047053510859.17 PE=4 SV=1;>tr|Q4D245|Q4D245_TRYCC Nucleolar RNA-binding protein, putative OS=Trypanosoma cruzi (strain CL Brener) GN=Tc00.10470	621390000
MMLDSGAAMR	M	Acetyl (Protein N-term)	2393;1398	tr|Q4DKT3|Q4DKT3_TRYCC;tr|Q4D5Q2|Q4D5Q2_TRYCC	1	0	0	0	By matching	By matching	By matching	By MS/MS	4	1	0	1						1	78832	79133	2	0.547	63077	sample47_1	108.47	67476	0	0	0	0	0			10052	2393;1398	9659	96208	74006	74006			1	Q4DKT3	>tr|Q4DKT3|Q4DKT3_TRYCC Uncharacterized protein OS=Trypanosoma cruzi (strain CL Brener) GN=Tc00.1047053509569.44 PE=4 SV=1	212920000
MMVHAETVEEAPAK	M	Acetyl (Protein N-term)	1640	tr|Q4D9H2|Q4D9H2_TRYCC	1	0	0	0	By matching	By MS/MS	By MS/MS	By matching	2	1	0	6		1	2	2	1		52027	52568	2	0.0014528	37346	sample43_2	83243	21586	144330000	0	53895000	0	0			10060	1640	9667	96267;96268;96269;96270;96271;96272	74049;74050;74051	74050			3	Q4D9H2	>tr|Q4D9H2|Q4D9H2_TRYCC Uncharacterized protein OS=Trypanosoma cruzi (strain CL Brener) GN=Tc00.1047053508299.20 PE=4 SV=1	130560000
MMVHAETVEK	M	Acetyl (Protein N-term)	2592	tr|Q4DPQ4|Q4DPQ4_TRYCC	1	0	0	0	By matching	By matching	By MS/MS	By MS/MS	3	1	0	5		1			2	2	42438	42908	2	0.0041759	30402	sample47_1	103.26	76549	118820000	0	5938000	31317000	81563000			10061	2592	9668	96273;96274;96275;96276;96277	74052;74053;74054;74055	74053			4	Q4DPQ4	>tr|Q4DPQ4|Q4DPQ4_TRYCC Uncharacterized protein OS=Trypanosoma cruzi (strain CL Brener) GN=Tc00.1047053511181.150 PE=4 SV=1	0
MNGQAAESGGGGSINITQLPLEQLEELRK	M	Acetyl (Protein N-term)	2298	tr|Q4DVG6|Q4DVG6_TRYCC;tr|Q4DJ99|Q4DJ99_TRYCC	1	0	0	1	By matching	By matching	By matching	By MS/MS	4	1	0	1						1	103.65	103.7	3	1.43e-08	96376	sample47_2	101.86	79208	61731000	0	0	0	61731000			10073	2298	9679	96338	74109;74110	74110			2	Q4DVG6	>tr|Q4DVG6|Q4DVG6_TRYCC Prefoldin, putative OS=Trypanosoma cruzi (strain CL Brener) GN=Tc00.1047053506859.90 PE=4 SV=1;>tr|Q4DJ99|Q4DJ99_TRYCC Prefoldin, putative OS=Trypanosoma cruzi (strain CL Brener) GN=Tc00.1047053511815.60 PE=4 SV=1	0
MNVFDCTLCVATTISQFLVDEVMK	M	Acetyl (Protein N-term)	622	tr|Q4CU50|Q4CU50_TRYCC	1	0	0	0	By matching	By matching	By MS/MS	By matching	3	1	0	1					1		113.23	113.23	3	0.0056413	93551	sample46_1	40402	22501	9216500	0	0	9216500	0			10086	622	9692	96456	74194	74194			1	Q4CU50	>tr|Q4CU50|Q4CU50_TRYCC D-isomer specific 2-hydroxyacid dehydrogenase-protein, putative OS=Trypanosoma cruzi (strain CL Brener) GN=Tc00.1047053506263.30 PE=4 SV=1	0
MQNDLAQILK	M	Acetyl (Protein N-term)	3572	tr|Q4E638|Q4E638_TRYCC;tr|Q4D398|Q4D398_TRYCC	1	0	0	0	By matching	By matching	By MS/MS	By MS/MS	3	1	0	3					1	2	97558	97807	2	0.0025496	89708	sample47_2	94692	57365	5739600	0	0	0	5739600			10127	3572	9731	96794;96795;96796	74417;74418;74419	74419			3	Q4E638	>tr|Q4E638|Q4E638_TRYCC Uncharacterized protein OS=Trypanosoma cruzi (strain CL Brener) GN=Tc00.1047053508153.540 PE=4 SV=1;>tr|Q4D398|Q4D398_TRYCC Uncharacterized protein OS=Trypanosoma cruzi (strain CL Brener) GN=Tc00.1047053506697.10 PE=4 SV=1	64751000
MSLKGQASPLWRGNR	M	Acetyl (Protein N-term)	3248	tr|Q4E0H1|Q4E0H1_TRYCC	1	0	0	2	By matching	By matching	By MS/MS	By matching	3	1	0	1					1		74107	74507	3	0.035646	58600	sample46_1	48608	76668	0	0	0	0	0			10177	3248	9781	97124	74617	74617			1	Q4E0H1	>tr|Q4E0H1|Q4E0H1_TRYCC Uncharacterized protein OS=Trypanosoma cruzi (strain CL Brener) GN=Tc00.1047053510155.50 PE=4 SV=1;>tr|Q4E177|Q4E177_TRYCC Uncharacterized protein OS=Trypanosoma cruzi (strain CL Brener) GN=Tc00.1047053511585.50 PE=4 SV=1	216060000
MWLENITR	M	Acetyl (Protein N-term)	590	tr|Q4CTM1|Q4CTM1_TRYCC;tr|Q4CX34|Q4CX34_TRYCC	1	0	0	0	By matching	By matching	By matching	By MS/MS	4	1	0	1						1	104.97	104.87	2	0.016853	86499	sample47_1	89029	44415	0	0	0	0	0			10247	590	9848	97611	74976	74976			1	Q4CTM1	>tr|Q4CTM1|Q4CTM1_TRYCC Uncharacterized protein OS=Trypanosoma cruzi (strain CL Brener) GN=Tc00.1047053503813.10 PE=4 SV=1;>tr|Q4CX34|Q4CX34_TRYCC Uncharacterized protein OS=Trypanosoma cruzi (strain CL Brener) GN=Tc00.1047053506709.10 PE=4 SV=1	0
NGEVSVERK	N	Acetyl (Protein N-term)	1060	tr|Q4D0N8|Q4D0N8_TRYCC;tr|Q4CLP8|Q4CLP8_TRYCC	1	0	0	1	By matching	By MS/MS	By matching	By matching	2	1	0	6		1	1	1	1	2	10319	10511	2	0.018565	4646	sample43_2	72607	18264	152100000	0	50067000	13147000	54634000			10542	1060	10125	100185;100186;100187;100188;100189;100190	76919	76919			1	Q4D0N8	>tr|Q4D0N8|Q4D0N8_TRYCC Uncharacterized protein OS=Trypanosoma cruzi (strain CL Brener) GN=Tc00.1047053508961.70 PE=4 SV=1;>tr|Q4CLP8|Q4CLP8_TRYCC Uncharacterized protein (Fragment) OS=Trypanosoma cruzi (strain CL Brener) GN=Tc00.1047053434931.20 PE=4 SV=1	87929000
SAENAERPKNAVR	S	Acetyl (Protein N-term)	751	tr|Q4DE55|Q4DE55_TRYCC;tr|Q4CW23|Q4CW23_TRYCC	1	0	0	2	By MS/MS	By matching	By matching	By matching	1	1	0	2	1		1				79737	79891	3	0.0036124	60160	sample44_1	75819	29115	5965200	0	0	0	0			12020	751	11533	113330;113331	86263;86264	86264			2	Q4DE55	>tr|Q4DE55|Q4DE55_TRYCC Uncharacterized protein OS=Trypanosoma cruzi (strain CL Brener) GN=Tc00.1047053504089.60 PE=4 SV=1;>tr|Q4CW23|Q4CW23_TRYCC Uncharacterized protein OS=Trypanosoma cruzi (strain CL Brener) GN=Tc00.1047053504001.10 PE=4 SV=1	3095300000
SAESLPSDESEAHQQPQPQK	S	Acetyl (Protein N-term)	1034	tr|Q4DDJ4|Q4DDJ4_TRYCC;tr|Q4D0E0|Q4D0E0_TRYCC	1	0	0	0	By matching	By matching	By MS/MS	By matching	3	1	0	1					1		36691	37242	2	0.0046791	27090	sample46_2	62792	33909	0	0	0	0	0			12023	1034	11535	113357	86282	86282			1	Q4DDJ4	>tr|Q4DDJ4|Q4DDJ4_TRYCC Uncharacterized protein OS=Trypanosoma cruzi (strain CL Brener) GN=Tc00.1047053509267.110 PE=4 SV=1;>tr|Q4D0E0|Q4D0E0_TRYCC Uncharacterized protein OS=Trypanosoma cruzi (strain CL Brener) GN=Tc00.1047053510031.70 PE=4 SV=1	0
SAESLPSDESEAHQQPQPQKK	S	Acetyl (Protein N-term)	1034	tr|Q4DDJ4|Q4DDJ4_TRYCC;tr|Q4D0E0|Q4D0E0_TRYCC	1	0	0	1	By MS/MS	By matching	By matching	By matching	1	1	0	1	1						27832	28083	3	0.0015312	17993	sample42_2	68.41	32538	0	0	0	0	0			12024	1034	11536	113358	86283	86283			1	Q4DDJ4	>tr|Q4DDJ4|Q4DDJ4_TRYCC Uncharacterized protein OS=Trypanosoma cruzi (strain CL Brener) GN=Tc00.1047053509267.110 PE=4 SV=1;>tr|Q4D0E0|Q4D0E0_TRYCC Uncharacterized protein OS=Trypanosoma cruzi (strain CL Brener) GN=Tc00.1047053510031.70 PE=4 SV=1	0
SAFNPDAPAFIPTFLR	S	Acetyl (Protein N-term)	2529	tr|Q4DNJ8|Q4DNJ8_TRYCC;tr|Q4D3H7|Q4D3H7_TRYCC	1	0	0	0	By matching	By matching	By MS/MS	By MS/MS	3	1	0	4					2	2	110.85	110.8	2	0.974	92050	sample47_1	81713	58117	91358000	0	0	27850000	63509000			12030	2529	11542	113418;113419;113420;113421	86312;86313	86313			2	Q4DNJ8	>tr|Q4DNJ8|Q4DNJ8_TRYCC RNA guanylyltransferase, putative OS=Trypanosoma cruzi (strain CL Brener) GN=Tc00.1047053506871.160 PE=4 SV=1;>tr|Q4D3H7|Q4D3H7_TRYCC RNA guanylyltransferase, putative OS=Trypanosoma cruzi (strain CL Brener) GN=Tc00.1047053507511.30	0
SALTESLLDLHK	S	Acetyl (Protein N-term)	3428	tr|Q4E3B2|Q4E3B2_TRYCC	1	0	0	0	By matching	By matching	By MS/MS	By MS/MS	3	1	0	4					2	2	86034	86.41	2	0.00030099	77353	sample46_2	113.24	89284	102910000	0	0	37361000	65552000			12057	3428	11569	113631;113632;113633;113634	86466;86467;86468;86469	86467			4	Q4E3B2	>tr|Q4E3B2|Q4E3B2_TRYCC Uncharacterized protein OS=Trypanosoma cruzi (strain CL Brener) GN=Tc00.1047053508355.160 PE=4 SV=1	142920000
SAQTSSQPHPLKDR	S	Acetyl (Protein N-term)	2951;2550	tr|Q4DVL6|Q4DVL6_TRYCC;tr|Q4DP05|Q4DP05_TRYCC	1	0	0	1	By matching	By matching	By matching	By MS/MS	4	1	0	1						1	17427	17727	2	0.010921	9452	sample47_1	66059	38961	0	0	0	0	0			12076	2951;2550	11588	113775	86570	86570			1	Q4DVL6	>tr|Q4DVL6|Q4DVL6_TRYCC Uncharacterized protein OS=Trypanosoma cruzi (strain CL Brener) GN=Tc00.1047053508207.180 PE=4 SV=1	184830000
SDELGELELR	S	Acetyl (Protein N-term)	2116	tr|Q4DGL9|Q4DGL9_TRYCC	1	0	0	0	By matching	By MS/MS	By matching	By matching	2	1	0	2		1		1			17.08	17406	2	0.038481	9295	sample43_1	60398	15551	15728000	0	8108200	0	0			12156	2116	11664	114537;114538	87151	87151			0	Q4DGL9	>tr|Q4DGL9|Q4DGL9_TRYCC Acetyltransferase, putative OS=Trypanosoma cruzi (strain CL Brener) GN=Tc00.1047053511671.70 PE=4 SV=1	0
SDPDKSNTAASQEDASGNVASK	S	Acetyl (Protein N-term)	264	tr|Q4CNC1|Q4CNC1_TRYCC	1	0	0	1	By MS/MS	By matching	By MS/MS	By MS/MS	1	1	0	6	1			1	2	2	25081	25301	2	1.91e-17	15809	sample47_2	119.25	84041	126470000	0	0	39742000	78195000			12185	264	11693	114806;114807;114808;114809;114810;114811	87325;87326;87327;87328;87329;87330	87329			6	Q4CNC1	>tr|Q4CNC1|Q4CNC1_TRYCC Aspartyl-tRNA synthetase, putative OS=Trypanosoma cruzi (strain CL Brener) GN=Tc00.1047053510777.20 PE=3 SV=1;>tr|Q4CWW7|Q4CWW7_TRYCC Aspartyl-tRNA synthetase, putative (Fragment) OS=Trypanosoma cruzi (strain CL Brener) GN=Tc00.1047	711240000
SDSTEQSVIKPETSK	S	Acetyl (Protein N-term)	970	tr|Q4CZF4|Q4CZF4_TRYCC	1	0	0	1	By MS/MS	By matching	By matching	By matching	1	1	0	1	1						35497	35497	2	0.031706	23510	sample42_1	55755	19462	0	0	0	0	0			12193	970	11701	114902	87385	87385			1	Q4CZF4	>tr|Q4CZF4|Q4CZF4_TRYCC Uncharacterized protein OS=Trypanosoma cruzi (strain CL Brener) GN=Tc00.1047053510911.14 PE=4 SV=1	0
SDSTEQSVSKPETSK	S	Acetyl (Protein N-term)	220	tr|Q4CMM3|Q4CMM3_TRYCC	1	0	0	1	By MS/MS	By matching	By MS/MS	By MS/MS	1	1	0	6	1		1		2	2	19837	20116	2	7.91e-110	12089	sample46_2	218.12	166.87	62476000	0	0	25782000	31449000			12194	220	11702	114903;114904;114905;114906;114907;114908	87386;87387;87388;87389;87390	87389			5	Q4CMM3	>tr|Q4CMM3|Q4CMM3_TRYCC Uncharacterized protein OS=Trypanosoma cruzi (strain CL Brener) GN=Tc00.1047053458759.14 PE=4 SV=1	0
SFQEIGVAFAR	S	Acetyl (Protein N-term)	1547	tr|Q4D7W2|Q4D7W2_TRYCC	1	0	0	0	By matching	By matching	By MS/MS	By MS/MS	3	1	0	5				1	2	2	98.28	98514	2	0.00098217	79802	sample46_1	77185	49271	19675000	0	0	0	18645000			12319	1547	11825	116142;116143;116144;116145;116146	88290;88291;88292;88293	88290			4	Q4D7W2	>tr|Q4D7W2|Q4D7W2_TRYCC Nuclear transport factor 2, putative OS=Trypanosoma cruzi (strain CL Brener) GN=Tc00.1047053511407.10 PE=4 SV=1	0
SGRPEEGLYDNEEIQAPTVPQGDR	S	Acetyl (Protein N-term)	1000;2577	tr|Q4CZV4|Q4CZV4_TRYCC;tr|Q4DPF1|Q4DPF1_TRYCC	1	0	0	1	By matching	By matching	By MS/MS	By MS/MS	3	1	0	6		2			2	2	66864	67356	2	0.0047644	52119	sample46_1	50803	35257	307760000	0	71655000	89255000	146850000			12394	1000;2577	11897	116888;116889;116890;116891;116892;116893	88844;88845;88846	88844			2	Q4CZV4	>tr|Q4CZV4|Q4CZV4_TRYCC Retrotransposon hot spot (RHS) protein, putative (Fragment) OS=Trypanosoma cruzi (strain CL Brener) GN=Tc00.1047053509903.5 PE=4 SV=1	509670000
SGRPESVQGGNVESQSSNVSQGGR	S	Acetyl (Protein N-term)	3258	tr|Q4E0M5|Q4E0M5_TRYCC	1	0	0	1	By matching	By matching	By MS/MS	By MS/MS	3	1	0	7					5	2	30.23	30.62	2;3	6.29e-13	19871	sample47_1	107.95	83.74	101440000	0	0	48508000	52935000			12395	3258	11898	116894;116895;116896;116897;116898;116899;116900	88847;88848;88849;88850;88851;88852	88851			6	Q4E0M5	>tr|Q4E0M5|Q4E0M5_TRYCC Retrotransposon hot spot (RHS) protein, putative (Fragment) OS=Trypanosoma cruzi (strain CL Brener) GN=Tc00.1047053509429.4 PE=4 SV=1	0
SHAGNVTNVYDEK	S	Acetyl (Protein N-term)	3069	tr|Q4DXE3|Q4DXE3_TRYCC	1	0	0	0	By matching	By matching	By MS/MS	By matching	3	1	0	4					2	2	30463	30864	2	1.88e-20	21328	sample46_2	161.21	109.23	61476000	0	0	12905000	48571000			12429	3069	11932	117216;117217;117218;117219	89093;89094	89094			2	Q4DXE3	>tr|Q4DXE3|Q4DXE3_TRYCC Uncharacterized protein OS=Trypanosoma cruzi (strain CL Brener) GN=Tc00.1047053508879.150 PE=4 SV=1	0
SHTAEHGMEEADMK	S	Acetyl (Protein N-term)	1850	tr|Q4DCD6|Q4DCD6_TRYCC	1	0	0	0	By matching	By MS/MS	By matching	By MS/MS	2	1	0	2		1				1	22009	21884	2	0.00090596	12785	sample43_1	103.13	87973	0	0	0	0	0			12462	1850	11965	117489;117490	89314;89315	89314			2	Q4DCD6	>tr|Q4DCD6|Q4DCD6_TRYCC Protein phosphatase 1, regulatory subunit, putative OS=Trypanosoma cruzi (strain CL Brener) GN=Tc00.1047053507867.60 PE=4 SV=1	168970000
SLEEVEPNFFTLSPDSPLR	S	Acetyl (Protein N-term)	2953	tr|Q4DVM8|Q4DVM8_TRYCC	1	0	0	0	By matching	By matching	By MS/MS	By MS/MS	3	1	0	4					2	2	110.81	110.74	2	0.00011634	104887	sample46_2	84436	59026	96766000	0	0	23214000	73552000			12600	2953	12093	119145;119146;119147;119148	90666;90667;90668;90669	90667			4	Q4DVM8	>tr|Q4DVM8|Q4DVM8_TRYCC Adenine phosphoribosyltransferase, putative OS=Trypanosoma cruzi (strain CL Brener) GN=Tc00.1047053508207.74 PE=4 SV=1	0
SLTLQSEQFQHIVR	S	Acetyl (Protein N-term)	3237	tr|Q4E093|Q4E093_TRYCC	1	0	0	0	By matching	By matching	By MS/MS	By MS/MS	3	1	0	5					2	3	73203	73703	2	7.04e-09	63797	sample46_2	134.06	83252	121920000	0	0	73655000	48268000			12700	3237	12192	120029;120030;120031;120032;120033	91367;91368;91369;91370;91371;91372	91369			6	Q4E093	>tr|Q4E093|Q4E093_TRYCC 40S ribosomal protein S18, putative OS=Trypanosoma cruzi (strain CL Brener) GN=Tc00.1047053506679.100 PE=3 SV=1	3418700000
SQSVENNALLAEIAQLK	S	Acetyl (Protein N-term)	1690	tr|Q4DA54|Q4DA54_TRYCC	1	0	0	0	By matching	By matching	By matching	By MS/MS	4	1	0	1						1	106.81	106.76	2	0.011717	100319	sample47_2	55322	31.96	14909000	0	0	0	14909000			12918	1690	12403	121922	92790;92791	92790			2	Q4DA54	>tr|Q4DA54|Q4DA54_TRYCC Histidyl-tRNA synthetase, putative OS=Trypanosoma cruzi (strain CL Brener) GN=Tc00.1047053507019.40 PE=1 SV=1	256010000
SSDIIEHSFFFTPLER	S	Acetyl (Protein N-term)	876	tr|Q4DZY5|Q4DZY5_TRYCC;tr|Q4CY09|Q4CY09_TRYCC	1	0	0	0	By matching	By matching	By MS/MS	By MS/MS	3	1	0	4					2	2	105.46	105.41	2	2.14e-07	98582	sample47_2	112.34	47818	50078000	0	0	31804000	18274000			12958	876	12441	122266;122267;122268;122269	93048;93049;93050	93050			3	Q4DZY5	>tr|Q4DZY5|Q4DZY5_TRYCC Cholinephosphate cytidylyltransferase A, putative OS=Trypanosoma cruzi (strain CL Brener) GN=Tc00.1047053509805.220 PE=4 SV=1;>tr|Q4CY09|Q4CY09_TRYCC Cholinephosphate cytidylyltransferase A, putative OS=Trypanosoma cruzi (strain CL	0
STVEDFVLQALASTDAVESDK	S	Acetyl (Protein N-term)	3114	tr|Q4DY45|Q4DY45_TRYCC	1	0	0	0	By matching	By matching	By matching	By MS/MS	4	1	0	4					2	2	112.4	112.34	2	3.83e-13	107197	sample47_2	117.38	84634	116400000	0	0	36036000	80360000			13112	3114	12588	123652;123653;123654;123655	94102;94103;94104	94104			3	Q4DY45	>tr|Q4DY45|Q4DY45_TRYCC Phenylalanyl-tRNA synthetase alpha chain, putative OS=Trypanosoma cruzi (strain CL Brener) GN=Tc00.1047053511727.140 PE=4 SV=1	315560000
SVAEGFLSHGEPCTR	S	Acetyl (Protein N-term)	2917	tr|Q4DV00|Q4DV00_TRYCC;tr|Q4DN45|Q4DN45_TRYCC	1	0	0	0	By matching	By matching	By MS/MS	By MS/MS	3	1	0	5					3	2	63943	64393	2	0.00019377	53714	sample47_2	94532	67434	163010000	0	0	55071000	107930000			13122	2917	12598	123716;123717;123718;123719;123720	94135;94136;94137;94138	94137			4	Q4DV00	>tr|Q4DV00|Q4DV00_TRYCC Uncharacterized protein OS=Trypanosoma cruzi (strain CL Brener) GN=Tc00.1047053506811.170 PE=4 SV=1	0
SVESGLSAGDGGEEKPDSGR	S	Acetyl (Protein N-term)	2717	tr|Q4DRQ6|Q4DRQ6_TRYCC	1	0	0	1	By MS/MS	By MS/MS	By matching	By matching	1	1	0	8	2	1	1	1	1	2	41632	42157	2	0.00033184	29596	sample44_2	90453	62422	158140000	0	25115000	24527000	78671000			13147	2717	12623	123944;123945;123946;123947;123948;123949;123950;123951	94306;94307;94308;94309;94310;94311	94310			5	Q4DRQ6	>tr|Q4DRQ6|Q4DRQ6_TRYCC Uncharacterized protein OS=Trypanosoma cruzi (strain CL Brener) GN=Tc00.1047053506739.160 PE=4 SV=1	0
SVFGVDFGNLNSTVAITR	S	Acetyl (Protein N-term)	2223;1436	tr|Q4D673|Q4D673_TRYCC;tr|Q4DI67|Q4DI67_TRYCC	1	0	0	0	By matching	By matching	By MS/MS	By MS/MS	3	1	0	4					2	2	109.88	109.83	2	1.2e-05	104129	sample47_2	115.26	81079	82979000	0	0	38106000	44874000			13152	1436;2223	12628	123977;123978;123979;123980	94325;94326;94327;94328;94329	94329			5	Q4D673	>tr|Q4D673|Q4D673_TRYCC Heat shock protein, putative (Fragment) OS=Trypanosoma cruzi (strain CL Brener) GN=Tc00.1047053511263.9 PE=3 SV=1	59048000
SVQEFDPR	S	Acetyl (Protein N-term)	506	tr|Q4CST7|Q4CST7_TRYCC;tr|Q4CS97|Q4CS97_TRYCC	1	0	0	0	By MS/MS	By matching	By matching	By matching	1	1	0	1	1						60598	60598	2	0.028462	44638	sample42_1	81525	30332	0	0	0	0	0			13205	506	12680	124469	94672	94672			1	Q4CST7	>tr|Q4CST7|Q4CST7_TRYCC Cysteine synthase, putative OS=Trypanosoma cruzi (strain CL Brener) GN=Tc00.1047053507165.50 PE=4 SV=1;>tr|Q4CS97|Q4CS97_TRYCC Cysteine synthase, putative OS=Trypanosoma cruzi (strain CL Brener) GN=Tc00.1047053507793.20 PE=4 SV=1	0
SYLTEEEEKER	S	Acetyl (Protein N-term)	650	tr|Q4DM83|Q4DM83_TRYCC;tr|Q4CUG7|Q4CUG7_TRYCC;tr|Q4CQ92|Q4CQ92_TRYCC	1	0	0	1	By MS/MS	By MS/MS	By MS/MS	By MS/MS	1	1	0	8	1	1			4	2	40844	41494	2	0.00095602	30560	sample47_2	118.77	99567	125070000	0	44142000	0	80931000			13264	650	12737	125041;125042;125043;125044;125045;125046;125047;125048	95156;95157;95158;95159;95160;95161;95162;95163	95163			8	Q4DM83	>tr|Q4DM83|Q4DM83_TRYCC Uncharacterized protein OS=Trypanosoma cruzi (strain CL Brener) GN=Tc00.1047053511301.100 PE=4 SV=1;>tr|Q4CUG7|Q4CUG7_TRYCC Uncharacterized protein OS=Trypanosoma cruzi (strain CL Brener) GN=Tc00.1047053507211.30 PE=4 SV=1;>tr|Q4CQ9	73847000
SYTIQVR	S	Acetyl (Protein N-term)	2807;1289	tr|Q4DT61|Q4DT61_TRYCC;tr|Q4D488|Q4D488_TRYCC	1	0	0	0	By matching	By matching	By MS/MS	By matching	3	1	0	1					1		55721	56121	2	0.00084728	42276	sample46_1	106.04	44.08	0	0	0	0	0			13268	2807;1289	12741	125084	95176	95176			1	Q4DT61	>tr|Q4DT61|Q4DT61_TRYCC RNA-binding protein, putative OS=Trypanosoma cruzi (strain CL Brener) GN=Tc00.1047053511621.50 PE=4 SV=1	1625700000
TAFLDNKLEYLQK	T	Acetyl (Protein N-term)	3333	tr|Q4E1S6|Q4E1S6_TRYCC;tr|Q4D6Z4|Q4D6Z4_TRYCC	1	0	0	1	By matching	By matching	By matching	By MS/MS	4	1	0	4					2	2	82956	83331	2	0.00055419	66878	sample47_1	101.72	72356	95488000	0	0	30154000	65335000			13329	3333	12796	125635;125636;125637;125638	95655;95656	95655			2	Q4E1S6	>tr|Q4E1S6|Q4E1S6_TRYCC Adenylate kinase, putative OS=Trypanosoma cruzi (strain CL Brener) GN=Tc00.1047053506855.180 PE=3 SV=1;>tr|Q4D6Z4|Q4D6Z4_TRYCC Adenylate kinase, putative OS=Trypanosoma cruzi (strain CL Brener) GN=Tc00.1047053503479.30 PE=3 SV=1	580340000
TAPSTTAASTAVPFLEVK	T	Acetyl (Protein N-term)	370	tr|Q4CQ45|Q4CQ45_TRYCC	1	0	0	0	By matching	By matching	By MS/MS	By MS/MS	3	1	0	4			1		1	2	96154	96342	2	0.0037412	78480	sample47_1	56906	29139	108230000	0	0	23516000	76791000			13357	370	12823	125816;125817;125818;125819	95766;95767;95768	95767			3	Q4CQ45	>tr|Q4CQ45|Q4CQ45_TRYCC Glutaminyl-tRNA synthetase, putative (Fragment) OS=Trypanosoma cruzi (strain CL Brener) GN=Tc00.1047053507913.39 PE=3 SV=1	0
TDKKEEQQNTEEYDYDR	T	Acetyl (Protein N-term)	2838	tr|Q4DTK4|Q4DTK4_TRYCC	1	0	0	2	By matching	By matching	By MS/MS	By MS/MS	3	1	0	6				1	2	3	25274	25494	2;3	0.0018321	15745	sample47_1	74993	61839	104890000	0	0	40633000	53198000			13436	2838	12896	126582;126583;126584;126585;126586;126587	96432;96433	96433			2	Q4DTK4	>tr|Q4DTK4|Q4DTK4_TRYCC 50S ribosomal protein L7Ae, putative OS=Trypanosoma cruzi (strain CL Brener) GN=Tc00.1047053507053.10 PE=4 SV=1	0
[truncated: 3 more columns]
