# Supplementary material for: Proteome-Wide Analysis of Trypanosoma cruzi Exponential and Stationary Growth Phases Reveals a Subcellular Compartment-Specific Regulation
Source: Genes (Basel). 2018 Aug 15;9(8):413. doi: 10.3390/genes9080413 (PMC6115888; doi:10.3390/genes9080413)
Supplement: Supplementary file 1 [file genes-09-00413-s001.zip › Supplementary Table 6.xlsx]

## Sheet: NAT CL_Brener Accession numbers
Uniprot	Detected	Fasta headers	Number of proteins	Peptides	Razor + unique peptides	Unique peptides	Sum peptides	LFQ_stationary	LFQ_stationary_DEVST	LFQ_stationary_SEM%	LFQ Stationary COUNT	LFQ_exponential	LFQ_exponential_STDEV	LFQ_exponential_SEM%	LFQ Exponential COUNT	Exponential/Stationary
Q4D4R3	x	>tr|Q4D0P4|Q4D0P4_TRYCC N-acetyltransferase subunit Nat1, putative OS=Trypanosoma cruzi (strain CL Brener) GN=Tc00.1047053510301.80 PE=4 SV=1;>tr|Q4D4R3|Q4D4R3_TRYCC N-acetyltransferase subunit Nat1, putative OS=Trypanosoma cruzi (strain CL Brener) GN=Tc00	2	10	10	10	29	197145000	4.91369e+07	24.9242	2	220620000	2.22739e+07	10.096	2	1.11907
Q4DEI2	x	>tr|Q4DEI2|Q4DEI2_TRYCC Acetyltransferase, putative OS=Trypanosoma cruzi (strain CL Brener) GN=Tc00.1047053504867.40 PE=4 SV=1	1	2	2	2	5	67153000		0	1	116530000	1.81161e+07	15.5463	2	1.73529
Q4D0P4	x	>tr|Q4D0P4|Q4D0P4_TRYCC N-acetyltransferase subunit Nat1, putative OS=Trypanosoma cruzi (strain CL Brener) GN=Tc00.1047053510301.80 PE=4 SV=1;>tr|Q4D4R3|Q4D4R3_TRYCC N-acetyltransferase subunit Nat1, putative OS=Trypanosoma cruzi (strain CL Brener) GN=Tc00	2	10	10	10	29	197145000	4.91369e+07	24.9242	2	220620000	2.22739e+07	10.096	2	1.11907
Q4CXU1	x	>tr|Q4DSK7|Q4DSK7_TRYCC RNA cytidine acetyltransferase OS=Trypanosoma cruzi (strain CL Brener) GN=Tc00.1047053511303.90 PE=3 SV=1;>tr|Q4CXU1|Q4CXU1_TRYCC RNA cytidine acetyltransferase OS=Trypanosoma cruzi (strain CL Brener) GN=Tc00.1047053509177.30 PE=3 S	2	1	1	1	3				0	53189000		0	1
Q4D750	x	>tr|Q4D750|Q4D750_TRYCC Uncharacterized protein OS=Trypanosoma cruzi (strain CL Brener) GN=Tc00.1047053504071.100 PE=4 SV=1	1	3	3	3	4				0	8917700		0	1
Q4DLD9	x	>tr|Q4DLD9|Q4DLD9_TRYCC Uncharacterized protein (Fragment) OS=Trypanosoma cruzi (strain CL Brener) GN=Tc00.1047053511311.80 PE=4 SV=1	1	12	2	2	42	146650000		0	1	212485000	7.1142e+07	33.481	2	1.44893
Q4DSK7	x	>tr|Q4DSK7|Q4DSK7_TRYCC RNA cytidine acetyltransferase OS=Trypanosoma cruzi (strain CL Brener) GN=Tc00.1047053511303.90 PE=3 SV=1;>tr|Q4CXU1|Q4CXU1_TRYCC RNA cytidine acetyltransferase OS=Trypanosoma cruzi (strain CL Brener) GN=Tc00.1047053509177.30 PE=3 S	2	1	1	1	3				0	53189000		0	1
Q4DGL9	x	>tr|Q4DGL9|Q4DGL9_TRYCC Acetyltransferase, putative OS=Trypanosoma cruzi (strain CL Brener) GN=Tc00.1047053511671.70 PE=4 SV=1	1	3	2	2	9				0				0
Q4DX16	x	>tr|Q4DX16|Q4DX16_TRYCC Acetyltransferase, putative OS=Trypanosoma cruzi (strain CL Brener) GN=Tc00.1047053508831.120 PE=4 SV=1	1	3	3	2	9	180440000	1.63059e+07	9.03673	2	139780000	3.3234e+06	2.37759	2	0.774662
Q4D2R1	ND	>tr|Q4D2R1|N-acetyltransferase complex ARD1 subunit, putative (EC 2.3.1.-)Tc00.1047053506713.40
Q4DSU6	ND	>tr|Q4DSU6|N-acetyltransferase complex ARD1 subunit, putativeTc00.1047053506227.230
Q4D7K3	ND	>tr|Q4D7K3|N-acetyltransferase complex ARD1 subunit, putative (Fragment)Tc00.1047053509719.9
Q4CQJ5	ND	>tr|Q4CQJ5|Alpha-tubulin N-acetyltransferase 1 (Alpha-TAT 1) (TAT 1) (EC 2.3.1.108) (Acetyltransferase mec-17 homolog 1)Tc00.1047053467287.10
Q4DJ26	ND	>tr|Q4DJ26|N-acetyltransferase, putativeTc00.1047053504797.34
Q4DM28	ND	>tr|Q4DM28|N-acetyltransferase, putativeTc00.1047053511577.86
Q4DTX9	ND	>tr|Q4DTX9|Alpha-tubulin N-acetyltransferase 2 (Alpha-TAT 2) (TAT 2) (EC 2.3.1.108) (Acetyltransferase mec-17 homolog 2)Tc00.1047053509233.160
Q4DVH3	ND	>tr|Q4DVH3|N-acetyltransferase, putative (Fragment)Tc00.1047053506859.4
Q4DJX5	ND	>tr|Q4DJX5|Serine acetyltransferase, putativeTc00.1047053510879.80
