# Supplementary material for: Proteome-Wide Analysis of Trypanosoma cruzi Exponential and Stationary Growth Phases Reveals a Subcellular Compartment-Specific Regulation
Source: Genes (Basel). 2018 Aug 15;9(8):413. doi: 10.3390/genes9080413 (PMC6115888; doi:10.3390/genes9080413)
Supplement: Supplementary file 1 [file genes-09-00413-s001.zip › Supplementary Table 7.xlsx]

## Sheet: oxidized_peptides_atleast2value
Supplementary Table 7: Methionine oxidized peptides
Log 2 Intensity stationary 1	Log2 Intensity stationary 2	COUNT_stationary	Log2 Intensity exponential 1	Log2 Intensity exponential 2	COUNT_exponential	Intensity stationary 1	Intensity stationary 2	average stationary	Intensity exponential 1	Intensity exponential 2	average exponential	exp/stationary	log2(exp/stationary)	C: Amino acid	C: Charge	N: Localization prob	N: Position	T: Proteins	T: Positions within proteins	T: Protein	T: Fasta headers	T: Number of Oxidation (M)	T: Oxidation (M) Probabilities
		0	23.693	24.3861	2				1.35614e+07	2.19254e+07	1.77434e+07			M	2	1	59	tr|Q4CX49|Q4CX49_TRYCC;tr|Q4CS80|Q4CS80_TRYCC	59;59	tr|Q4CX49|Q4CX49_TRYCC	>tr|Q4CX49|Q4CX49_TRYCC Uncharacterized protein OS=Trypanosoma cruzi (strain CL Brener) GN=Tc00.1047053504203.40 PE=4 SV=1;>tr|Q4CS80|Q4CS80_TRYCC Uncharacterized protein OS=Trypanosoma cruzi (strain CL Brener) GN=Tc00.1047053503791.30 PE=4 SV=1	1	LM(1)DQSLPVYDDVVTGSGR
		0	25.3659	24.7836	2				4.32411e+07	2.88807e+07	3.60609e+07			M	2	1	552	tr|Q4D5X0|Q4D5X0_TRYCC;tr|Q4D3T1|Q4D3T1_TRYCC	552;552	tr|Q4D5X0|Q4D5X0_TRYCC	>tr|Q4D5X0|Q4D5X0_TRYCC Elongation factor 2, putative OS=Trypanosoma cruzi (strain CL Brener) GN=Tc00.1047053508169.20 PE=4 SV=1;>tr|Q4D3T1|Q4D3T1_TRYCC Elongation factor 2, putative OS=Trypanosoma cruzi (strain CL Brener) GN=Tc00.1047053510963.90 PE=4 SV=	1	DLQEDFM(1)NGAPLK
		0	25.0304	24.5463	2				3.4269e+07	2.45004e+07	2.93847e+07			M	3	1	147	tr|Q4DQP2|Q4DQP2_TRYCC	147	tr|Q4DQP2|Q4DQP2_TRYCC	>tr|Q4DQP2|Q4DQP2_TRYCC Tubulin beta chain OS=Trypanosoma cruzi (strain CL Brener) GN=Tc00.1047053506563.40 PE=3 SV=1	1	EAESCDCLQGFQICHSLGGGTGSGM(1)GTLLISK
		0	27.1519	27.9942	2				1.4912e+08	2.67358e+08	2.08239e+08			M	2	1	99	tr|Q4CYH9|Q4CYH9_TRYCC;tr|Q4DYB1|Q4DYB1_TRYCC;tr|Q4DYB0|Q4DYB0_TRYCC;tr|Q4DYA8|Q4DYA8_TRYCC;tr|Q4CYH8|Q4CYH8_TRYCC	99;99;99;99;99	tr|Q4CYH9|Q4CYH9_TRYCC	>tr|Q4CYH9|Q4CYH9_TRYCC Histone H2A (Fragment) OS=Trypanosoma cruzi (strain CL Brener) GN=Tc00.1047053508321.11 PE=3 SV=1;>tr|Q4DYB1|Q4DYB1_TRYCC Histone H2A OS=Trypanosoma cruzi (strain CL Brener) GN=Tc00.1047053511817.151 PE=3 SV=1;>tr|Q4DYB0|Q4DYB0_TRYC	1	HDDDLGM(1)LLK
		0	25.4992	26.2312	2				4.74268e+07	7.87731e+07	63099971			M	2	1	449	tr|Q4D5X0|Q4D5X0_TRYCC;tr|Q4D3T1|Q4D3T1_TRYCC	449;449	tr|Q4D5X0|Q4D5X0_TRYCC	>tr|Q4D5X0|Q4D5X0_TRYCC Elongation factor 2, putative OS=Trypanosoma cruzi (strain CL Brener) GN=Tc00.1047053508169.20 PE=4 SV=1;>tr|Q4D3T1|Q4D3T1_TRYCC Elongation factor 2, putative OS=Trypanosoma cruzi (strain CL Brener) GN=Tc00.1047053510963.90 PE=4 SV=	1	YQEAVEDM(1)PCGNVVGLVGVDK
		0	26.0188	26.8174	2				6.79891e+07	1.18261e+08	9.31251e+07			M	3	1	21	tr|Q4CM56|Q4CM56_TRYCC;tr|Q4CVR5|Q4CVR5_TRYCC;tr|Q4D301|Q4D301_TRYCC;tr|Q4D2Z9|Q4D2Z9_TRYCC	21;21;21;21	tr|Q4CM56|Q4CM56_TRYCC	>tr|Q4CM56|Q4CM56_TRYCC Tryparedoxin peroxidase, putative OS=Trypanosoma cruzi (strain CL Brener) GN=Tc00.1047053507259.10 PE=4 SV=1;>tr|Q4CVR5|Q4CVR5_TRYCC Tryparedoxin peroxidase, putative OS=Trypanosoma cruzi (strain CL Brener) GN=Tc00.1047053487507.10	1	LNHPAPDFNETALM(1)PNGTFK
		0	25.6423	26.1822	2				5.23723e+07	7.61426e+07	6.42574e+07			M	2	1	87	tr|Q4DTM8|Q4DTM8_TRYCC;tr|Q4DTM9|Q4DTM9_TRYCC	87;87	tr|Q4DTM8|Q4DTM8_TRYCC	>tr|Q4DTM8|Q4DTM8_TRYCC Heat shock protein 70 (HSP70), putative OS=Trypanosoma cruzi (strain CL Brener) GN=Tc00.1047053511211.170 PE=3 SV=1;>tr|Q4DTM9|Q4DTM9_TRYCC Heat shock protein 70 (HSP70), putative OS=Trypanosoma cruzi (strain CL Brener) GN=Tc00.1047	1	FSDPVVQSDM(1)K
		0	25.6512	26.1592	2				5.26964e+07	7.49383e+07	6.38173e+07			M	2	1	296	tr|Q4DJX1|Q4DJX1_TRYCC	296	tr|Q4DJX1|Q4DJX1_TRYCC	>tr|Q4DJX1|Q4DJX1_TRYCC Ribosomal protein L3, putative OS=Trypanosoma cruzi (strain CL Brener) GN=Tc00.1047053510879.110 PE=3 SV=1	1	AVSM(1)EPNQATTTYDLTAK
		0	25.2504	26.2096	2				3.99142e+07	7.76025e+07	5.87584e+07			M	2	1	61	tr|Q4DAZ6|Q4DAZ6_TRYCC;tr|Q4CWF4|Q4CWF4_TRYCC;tr|Q4DTM8|Q4DTM8_TRYCC;tr|Q4DTM9|Q4DTM9_TRYCC	59;59;61;61	tr|Q4DTM8|Q4DTM8_TRYCC	>tr|Q4DAZ6|Q4DAZ6_TRYCC Heat shock 70 kDa protein, putative (Fragment) OS=Trypanosoma cruzi (strain CL Brener) GN=Tc00.1047053506135.9 PE=3 SV=1;>tr|Q4CWF4|Q4CWF4_TRYCC Heat shock 70 kDa protein, putative (Fragment) OS=Trypanosoma cruzi (strain CL Brener)	1	NQVAM(1)NPTNTVFDAK
		0	27.6585	28.2668	2				2.11855e+08	322964421	2.6741e+08			M	2	1	724	tr|Q4CPW4|Q4CPW4_TRYCC	724	tr|Q4CPW4|Q4CPW4_TRYCC	>tr|Q4CPW4|Q4CPW4_TRYCC Retrotransposon hot spot (RHS) protein, putative (Fragment) OS=Trypanosoma cruzi (strain CL Brener) GN=Tc00.1047053504605.10 PE=4 SV=1	1	M(1)ATAREHHTNTSTVR
		0	25.3751	24.4499	2				4.35177e+07	2.29168e+07	3.32172e+07			M	2	1	220	tr|Q4D4T4|Q4D4T4_TRYCC	220	tr|Q4D4T4|Q4D4T4_TRYCC	>tr|Q4D4T4|Q4D4T4_TRYCC Uncharacterized protein OS=Trypanosoma cruzi (strain CL Brener) GN=Tc00.1047053504253.50 PE=4 SV=1	1	RNLQALM(1)NTEEK
		0	26.6129	25.809	2				102631617	5.87873e+07	8.07094e+07			M	3	1	6	tr|Q4D2J1|Q4D2J1_TRYCC	6	tr|Q4D2J1|Q4D2J1_TRYCC	>tr|Q4D2J1|Q4D2J1_TRYCC Surface protease GP63, putative OS=Trypanosoma cruzi (strain CL Brener) GN=Tc00.1047053506971.20 PE=4 SV=1	2	ATVM(1)DAQSTTDRRFFPLM(1)ELVR
		0	24.2253	24.0752	2				1.96129e+07	1.76749e+07	1.86439e+07			M	2	1	41	tr|Q4DFL9|Q4DFL9_TRYCC	41	tr|Q4DFL9|Q4DFL9_TRYCC	>tr|Q4DFL9|Q4DFL9_TRYCC Uncharacterized protein OS=Trypanosoma cruzi (strain CL Brener) GN=Tc00.1047053508323.50 PE=4 SV=1	2	QSLEM(1)QREAGLAFDM(1)R
	26.5793	1	25.0655	25.6139	2		1.00269e+08	1.00269e+08	3.5113e+07	5.13514e+07	4.32322e+07	0.431162	-1.2137	M	2	1	1395	tr|Q4CPQ6|Q4CPQ6_TRYCC;tr|Q4CS87|Q4CS87_TRYCC	1395;62	tr|Q4CPQ6|Q4CPQ6_TRYCC	>tr|Q4CPQ6|Q4CPQ6_TRYCC Calpain cysteine peptidase, putative (Fragment) OS=Trypanosoma cruzi (strain CL Brener) GN=Tc00.1047053505985.9 PE=4 SV=1;>tr|Q4CS87|Q4CS87_TRYCC Calpain cysteine peptidase, putative (Fragment) OS=Trypanosoma cruzi (strain CL Brener	1	ELPLDDDSDFVAM(1)EQER
25.3408		1	26.0385	26.3501	2	4.24953e+07		4.24953e+07	6.89239e+07	8.55402e+07	7.7232e+07	1.81743	0.861896	M	3	1	609	tr|Q4DBM7|Q4DBM7_TRYCC;tr|Q4CQS6|Q4CQS6_TRYCC;tr|Q4DKH8|Q4DKH8_TRYCC	609;609;455	tr|Q4DBM7|Q4DBM7_TRYCC	>tr|Q4DBM7|Q4DBM7_TRYCC Heat shock protein 85, putative OS=Trypanosoma cruzi (strain CL Brener) GN=Tc00.1047053509105.140 PE=3 SV=1;>tr|Q4CQS6|Q4CQS6_TRYCC Heat shock protein 85, putative OS=Trypanosoma cruzi (strain CL Brener) GN=Tc00.1047053507713.30 PE=	1	TM(1)EINPAHPIVK
	26.2313	1	23.7569	26.599	2		7.87786e+07	7.87786e+07	1.41755e+07	1.01648e+08	5.79115e+07	0.735118	-0.443953	M	3	1	151	tr|Q4DF36|Q4DF36_TRYCC;tr|Q4DF38|Q4DF38_TRYCC;tr|Q4DG21|Q4DG21_TRYCC;tr|Q4DF37|Q4DF37_TRYCC;tr|Q4CXR9|Q4CXR9_TRYCC;tr|Q4CRX0|Q4CRX0_TRYCC;tr|Q4CRW9|Q4CRW9_TRYCC;tr|Q4E2W1|Q4E2W1_TRYCC;tr|Q4CYV4|Q4CYV4_TRYCC;tr|Q4D172|Q4D172_TRYCC	42;151;151;151;151;163;194;168;194;70	tr|Q4DG21|Q4DG21_TRYCC	>tr|Q4DF36|Q4DF36_TRYCC Cystathionine beta-synthase, putative OS=Trypanosoma cruzi (strain CL Brener) GN=Tc00.1047053508177.129 PE=4 SV=1;>tr|Q4DF38|Q4DF38_TRYCC Cystathionine beta-synthase OS=Trypanosoma cruzi (strain CL Brener) GN=Tc00.1047053508177.110	1	TETALPWDHPDSLIGM(1)AR
	24.3928	1	23.006	24.0206	2		2.20275e+07	2.20275e+07	8.42357e+06	1.70185e+07	1.2721e+07	0.577508	-0.792088	M	2	1	223	tr|Q4DHC9|Q4DHC9_TRYCC;tr|Q4DRH6|Q4DRH6_TRYCC	223;223	tr|Q4DRH6|Q4DRH6_TRYCC	>tr|Q4DHC9|Q4DHC9_TRYCC 14-3-3 protein, putative OS=Trypanosoma cruzi (strain CL Brener) GN=Tc00.1047053511167.90 PE=3 SV=1;>tr|Q4DRH6|Q4DRH6_TRYCC 14-3-3 protein, putative OS=Trypanosoma cruzi (strain CL Brener) GN=Tc00.1047053506775.80 PE=3 SV=1	1	EAALIM(1)QLLR
	23.4561	1	25.7589	26.6356	2		1.15077e+07	1.15077e+07	5.67808e+07	1.04259e+08	8.052e+07	6.99704	2.80674	M	2	1	351	tr|Q4DYP5|Q4DYP5_TRYCC;tr|Q4DYP6|Q4DYP6_TRYCC;tr|Q4DYP4|Q4DYP4_TRYCC	351;349;50	tr|Q4DYP5|Q4DYP5_TRYCC	>tr|Q4DYP5|Q4DYP5_TRYCC Chaperonin HSP60, mitochondrial OS=Trypanosoma cruzi (strain CL Brener) GN=Tc00.1047053507641.290 PE=3 SV=1;>tr|Q4DYP6|Q4DYP6_TRYCC Chaperonin HSP60, mitochondrial OS=Trypanosoma cruzi (strain CL Brener) GN=Tc00.1047053507641.280 PE	1	DDTVLLNGGGESSM(1)VK
	24.8791	1	24.4437	24.4315	2		3.08571e+07	3.08571e+07	2.28185e+07	2.26263e+07	2.27224e+07	0.736375	-0.441487	M	2	1	191	tr|Q4DTX7|Q4DTX7_TRYCC	191	tr|Q4DTX7|Q4DTX7_TRYCC	>tr|Q4DTX7|Q4DTX7_TRYCC ATP synthase subunit beta OS=Trypanosoma cruzi (strain CL Brener) GN=Tc00.1047053509233.180 PE=3 SV=1	1	TVIIM(1)ELINNVAK
	25.9383	1	24.7222	26.5112	2		6.42993e+07	6.42993e+07	2.76773e+07	9.56459e+07	6.16616e+07	0.958978	-0.0604308	M	2	1	610	tr|Q4DTM8|Q4DTM8_TRYCC;tr|Q4DTM9|Q4DTM9_TRYCC	610;611	tr|Q4DTM8|Q4DTM8_TRYCC	>tr|Q4DTM8|Q4DTM8_TRYCC Heat shock protein 70 (HSP70), putative OS=Trypanosoma cruzi (strain CL Brener) GN=Tc00.1047053511211.170 PE=3 SV=1;>tr|Q4DTM9|Q4DTM9_TRYCC Heat shock protein 70 (HSP70), putative OS=Trypanosoma cruzi (strain CL Brener) GN=Tc00.1047	1	ELENLCTPIM(1)TK
	26.0487	1	25.6741	26.319	2		6.94129e+07	6.94129e+07	5.35395e+07	8.3716e+07	6.86277e+07	0.988689	-0.0164114	M	2	1	129	tr|Q4CX87|Q4CX87_TRYCC	129	tr|Q4CX87|Q4CX87_TRYCC	>tr|Q4CX87|Q4CX87_TRYCC Tryparedoxin peroxidase, putative OS=Trypanosoma cruzi (strain CL Brener) GN=Tc00.1047053509499.14 PE=4 SV=1	1	GGLGEM(1)SIPVLSDLTK
	25.4461	1	24.5976	25.8294	2		4.5713e+07	4.5713e+07	2.53872e+07	5.96244e+07	4.25058e+07	0.929842	-0.104943	M	3	1	265	tr|Q4DCS7|Q4DCS7_TRYCC;tr|Q4E259|Q4E259_TRYCC	265;265	tr|Q4DCS7|Q4DCS7_TRYCC	>tr|Q4DCS7|Q4DCS7_TRYCC Ubiquitin hydrolase, putative OS=Trypanosoma cruzi (strain CL Brener) GN=Tc00.1047053509073.30 PE=3 SV=1;>tr|Q4E259|Q4E259_TRYCC Ubiquitin hydrolase, putative OS=Trypanosoma cruzi (strain CL Brener) GN=Tc00.1047053508707.180 PE=3 SV	1	PM(1)QLIWGENNSLK
	25.25	1	23.4711	25.4134	2		3.99032e+07	3.99032e+07	1.1628e+07	4.46885e+07	2.81582e+07	0.705664	-0.502946	M	3	0.996567	168	tr|Q4E5N1|Q4E5N1_TRYCC	168	tr|Q4E5N1|Q4E5N1_TRYCC	>tr|Q4E5N1|Q4E5N1_TRYCC Glucose-6-phosphate isomerase OS=Trypanosoma cruzi (strain CL Brener) GN=Tc00.1047053506529.508 PE=1 SV=1	1	SNRPIFVNGHDVM(0.997)PLVNKVLEQM(0.003)K
	24.6579	1	23.2419	23.8178	2		2.64708e+07	2.64708e+07	9.91994e+06	1.47867e+07	1.23533e+07	0.466677	-1.0995	M	2	1	662	tr|Q4CTH1|Q4CTH1_TRYCC	662	tr|Q4CTH1|Q4CTH1_TRYCC	>tr|Q4CTH1|Q4CTH1_TRYCC Uncharacterized protein OS=Trypanosoma cruzi (strain CL Brener) GN=Tc00.1047053503727.20 PE=4 SV=1	1	QQQQQKQM(1)KK
	26.3543	1	25.4643	25.774	2		8.57896e+07	8.57896e+07	4.62933e+07	5.73782e+07	5.18358e+07	0.604219	-0.726856	M	3	1	93	tr|Q4CWL3|Q4CWL3_TRYCC	93	tr|Q4CWL3|Q4CWL3_TRYCC	>tr|Q4CWL3|Q4CWL3_TRYCC Uncharacterized protein OS=Trypanosoma cruzi (strain CL Brener) GN=Tc00.1047053506979.30 PE=4 SV=1	1	RGEYNNNNINNNNKGEVM(1)LVVR
	21.8149	1	20.5973	21.5933	2		3.68926e+06	3.68926e+06	1.58637e+06	3.16396e+06	2.37517e+06	0.643806	-0.635303	M	2	1	104	tr|Q4CVH4|Q4CVH4_TRYCC	104	tr|Q4CVH4|Q4CVH4_TRYCC	>tr|Q4CVH4|Q4CVH4_TRYCC Glutamate dehydrogenase, putative (Fragment) OS=Trypanosoma cruzi (strain CL Brener) GN=Tc00.1047053505843.10 PE=4 SV=1	1	DHESHPGM(1)SK
	29.7912	1	23.9158	31.4139	2		9.29062e+08	9.29062e+08	1.58261e+07	2861054830	1438440452	1.54827	0.630658	M	2	1	1	tr|Q4DJG1|Q4DJG1_TRYCC	1	tr|Q4DJG1|Q4DJG1_TRYCC	>tr|Q4DJG1|Q4DJG1_TRYCC Uncharacterized protein OS=Trypanosoma cruzi (strain CL Brener) GN=Tc00.1047053507257.160 PE=4 SV=1	1	M(1)DTGGGFCFQDISGLAELLEKNDGFK
23.301		1	24.8337	26.0293	2	1.03347e+07		1.03347e+07	29901199	6.84857e+07	4.91935e+07	4.76001	2.25096	M	2	1	224	tr|Q4DWH0|Q4DWH0_TRYCC	224	tr|Q4DWH0|Q4DWH0_TRYCC	>tr|Q4DWH0|Q4DWH0_TRYCC Uncharacterized protein OS=Trypanosoma cruzi (strain CL Brener) GN=Tc00.1047053511725.200 PE=4 SV=1	2	QSEAM(1)SEM(1)ELQRR
24.8316		1	25.2056	24.4294	2	2.98577e+07		2.98577e+07	3.86938e+07	2.25934e+07	3.06436e+07	1.02632	0.0374838	M	2	1	8	tr|Q4D322|Q4D322_TRYCC	8	tr|Q4D322|Q4D322_TRYCC	>tr|Q4D322|Q4D322_TRYCC Receptor-type adenylate cyclase, putative OS=Trypanosoma cruzi (strain CL Brener) GN=Tc00.1047053509539.20 PE=4 SV=1	2	VTGWAVM(1)M(1)AAARQR
26.1943	26.9391	2	25.0187	25.4043	2	7.67839e+07	1.2867e+08	1.02727e+08	3.39922e+07	4.44075e+07	3.91998e+07	0.381593	-1.38989	M	2	1	72	tr|Q4CYU3|Q4CYU3_TRYCC;tr|Q4D066|Q4D066_TRYCC	72;72	tr|Q4CYU3|Q4CYU3_TRYCC	>tr|Q4CYU3|Q4CYU3_TRYCC Calpain-like cysteine peptidase, putative OS=Trypanosoma cruzi (strain CL Brener) GN=Tc00.1047053506983.39 PE=4 SV=1;>tr|Q4D066|Q4D066_TRYCC Calpain-like cysteine peptidase, putative OS=Trypanosoma cruzi (strain CL Brener) GN=Tc00.1	1	M(1)EKDEATGEFK
26.2056	26.5797	2	24.7489	25.9321	2	7.73876e+07	1.00297e+08	8.88422e+07	2.81943e+07	6.40236e+07	4.61089e+07	0.518998	-0.946199	M	4	0.999702	376	tr|Q4DKI7|Q4DKI7_TRYCC	376	tr|Q4DKI7|Q4DKI7_TRYCC	>tr|Q4DKI7|Q4DKI7_TRYCC Thiol-dependent reductase 1, putative OS=Trypanosoma cruzi (strain CL Brener) GN=Tc00.1047053509105.70 PE=4 SV=1	1	LLAEHQFGEGPFFGGATM(1)NAADVSLLPMLVHLK
27.526	28.0572	2	27.9557	28.5436	2	193264310	2.79292e+08	236278251	2.60318e+08	3.91273e+08	325795472	1.37886	0.46348	M	2	1	293	tr|Q4DQP2|Q4DQP2_TRYCC	293	tr|Q4DQP2|Q4DQP2_TRYCC	>tr|Q4DQP2|Q4DQP2_TRYCC Tubulin beta chain OS=Trypanosoma cruzi (strain CL Brener) GN=Tc00.1047053506563.40 PE=3 SV=1	1	GLSVPELTQQM(1)FDAK
23.3153	25.3287	2	23.6797	25.6623	2	1.04377e+07	4.21404e+07	2.6289e+07	1.34369e+07	5.31034e+07	3.32701e+07	1.26555	0.339767	M	2	1	449	tr|Q4DBM7|Q4DBM7_TRYCC;tr|Q4CQS6|Q4CQS6_TRYCC;tr|Q4DKH8|Q4DKH8_TRYCC	449;449;295	tr|Q4DBM7|Q4DBM7_TRYCC	>tr|Q4DBM7|Q4DBM7_TRYCC Heat shock protein 85, putative OS=Trypanosoma cruzi (strain CL Brener) GN=Tc00.1047053509105.140 PE=3 SV=1;>tr|Q4CQS6|Q4CQS6_TRYCC Heat shock protein 85, putative OS=Trypanosoma cruzi (strain CL Brener) GN=Tc00.1047053507713.30 PE=	1	FHSSESGEDM(1)TTLK
23.5518	23.9311	2	22.6044	23.5843	2	1.2297e+07	1.59948e+07	1.41459e+07	6.37679e+06	1.25771e+07	9.47696e+06	0.669945	-0.577886	M	2	1	54	tr|Q4D7Y4|Q4D7Y4_TRYCC;tr|Q4D3A7|Q4D3A7_TRYCC;tr|Q4D3A5|Q4D3A5_TRYCC	54;54;54	tr|Q4D7Y4|Q4D7Y4_TRYCC	>tr|Q4D7Y4|Q4D7Y4_TRYCC Kinetoplastid membrane protein KMP-11, putative OS=Trypanosoma cruzi (strain CL Brener) GN=Tc00.1047053510755.89 PE=4 SV=1;>tr|Q4D3A7|Q4D3A7_TRYCC Kinetoplastid membrane protein KMP-11 OS=Trypanosoma cruzi (strain CL Brener) GN=Tc00	1	M(1)IQEHTDKFNK
24.1648	24.3736	2	24.8256	23.7633	2	1.88074e+07	2.17363e+07	2.02718e+07	2.97338e+07	1.42386e+07	2.19862e+07	1.08457	0.117119	M	3	1	113	tr|Q4E4N4|Q4E4N4_TRYCC	113	tr|Q4E4N4|Q4E4N4_TRYCC	>tr|Q4E4N4|Q4E4N4_TRYCC Eukaryotic translation initiation factor 5A OS=Trypanosoma cruzi (strain CL Brener) GN=Tc00.1047053506925.120 PE=3 SV=1	1	TDPSKPAHLSLM(1)DDEGETR
24.8418	25.6362	2	25.6304	25.33	2	3.00696e+07	5.21513e+07	4.11104e+07	5.19421e+07	4.21784e+07	4.70602e+07	1.14473	0.195004	M	2	1	1	tr|Q4CNF4|Q4CNF4_TRYCC	1	tr|Q4CNF4|Q4CNF4_TRYCC	>tr|Q4CNF4|Q4CNF4_TRYCC 60S ribosomal protein L11, putative OS=Trypanosoma cruzi (strain CL Brener) GN=Tc00.1047053508197.10 PE=1 SV=1	1	M(1)ETHAVSEK
26.0833	26.5858	2	23.834	26.3851	2	7.10977e+07	100721749	8.59097e+07	1.49537e+07	8.76408e+07	5.12973e+07	0.597107	-0.743939	M	2	1	1	tr|Q4E318|Q4E318_TRYCC;tr|Q4DT12|Q4DT12_TRYCC	1;1	tr|Q4E318|Q4E318_TRYCC	>tr|Q4E318|Q4E318_TRYCC Uncharacterized protein OS=Trypanosoma cruzi (strain CL Brener) GN=Tc00.1047053506435.150 PE=4 SV=1;>tr|Q4DT12|Q4DT12_TRYCC Uncharacterized protein OS=Trypanosoma cruzi (strain CL Brener) GN=Tc00.1047053506265.130 PE=4 SV=1	1	M(1)EIIDRPLSELIK
24.4981	26.023	2	24.7369	25.9281	2	2.36953e+07	6.81873e+07	4.59413e+07	2.79608e+07	6.38463e+07	4.59035e+07	0.999177	-0.00118726	M	3	0.812412	302	tr|Q4CLA1|Q4CLA1_TRYCC	302	tr|Q4CLA1|Q4CLA1_TRYCC	>tr|Q4CLA1|Q4CLA1_TRYCC Tubulin alpha chain OS=Trypanosoma cruzi (strain CL Brener) GN=Tc00.1047053411235.9 PE=3 SV=1	1	AYHEQLSVSEISNAVFEPASM(0.188)M(0.812)TK
26.0345	25.9612	2	24.8691	24.9081	2	6.8733e+07	6.53281e+07	6.70306e+07	3.0644e+07	3.14837e+07	3.10638e+07	0.463428	-1.10958	M	2	1	57	tr|Q4DE55|Q4DE55_TRYCC;tr|Q4CW23|Q4CW23_TRYCC	57;57	tr|Q4DE55|Q4DE55_TRYCC	>tr|Q4DE55|Q4DE55_TRYCC Uncharacterized protein OS=Trypanosoma cruzi (strain CL Brener) GN=Tc00.1047053504089.60 PE=4 SV=1;>tr|Q4CW23|Q4CW23_TRYCC Uncharacterized protein OS=Trypanosoma cruzi (strain CL Brener) GN=Tc00.1047053504001.10 PE=4 SV=1	1	AINEAVSVVEM(1)LK
27.0761	27.2564	2	26.4696	26.2739	2	1.41488e+08	1.60322e+08	1.50905e+08	9.29274e+07	8.11394e+07	8.70334e+07	0.576743	-0.793999	M	4	1	405	tr|Q4E0Q0|Q4E0Q0_TRYCC;tr|Q4E3P5|Q4E3P5_TRYCC	405;405	tr|Q4E3P5|Q4E3P5_TRYCC	>tr|Q4E0Q0|Q4E0Q0_TRYCC Pyruvate, phosphate dikinase OS=Trypanosoma cruzi (strain CL Brener) GN=Tc00.1047053506297.190 PE=3 SV=1;>tr|Q4E3P5|Q4E3P5_TRYCC Pyruvate, phosphate dikinase OS=Trypanosoma cruzi (strain CL Brener) GN=Tc00.1047053510101.140 PE=3 SV=	1	IDPLQVDHLM(1)HPNIEPGAAK
24.9658	26.5946	2	26.1227	26.547	2	3.27684e+07	1.01338e+08	6.70532e+07	7.30662e+07	9.8049e+07	8.55576e+07	1.27597	0.35159	M	2	1	83	tr|Q4DBM7|Q4DBM7_TRYCC;tr|Q4CQS6|Q4CQS6_TRYCC;tr|Q4DBM6|Q4DBM6_TRYCC	83;83;83	tr|Q4DBM7|Q4DBM7_TRYCC	>tr|Q4DBM7|Q4DBM7_TRYCC Heat shock protein 85, putative OS=Trypanosoma cruzi (strain CL Brener) GN=Tc00.1047053509105.140 PE=3 SV=1;>tr|Q4CQS6|Q4CQS6_TRYCC Heat shock protein 85, putative OS=Trypanosoma cruzi (strain CL Brener) GN=Tc00.1047053507713.30 PE=	1	TLTVEDTGIGM(1)TK
26.2816	26.7542	2	26.1677	27.2796	2	8.15737e+07	1.13192e+08	9.7383e+07	7.53811e+07	1.62921e+08	1.19151e+08	1.22353	0.291052	M	2	1	76	tr|Q4DYP5|Q4DYP5_TRYCC;tr|Q4DYP6|Q4DYP6_TRYCC;tr|Q4E496|Q4E496_TRYCC	76;76;76	tr|Q4DYP5|Q4DYP5_TRYCC	>tr|Q4DYP5|Q4DYP5_TRYCC Chaperonin HSP60, mitochondrial OS=Trypanosoma cruzi (strain CL Brener) GN=Tc00.1047053507641.290 PE=3 SV=1;>tr|Q4DYP6|Q4DYP6_TRYCC Chaperonin HSP60, mitochondrial OS=Trypanosoma cruzi (strain CL Brener) GN=Tc00.1047053507641.280 PE	1	AIEFKDPFENM(1)GAQLVR
26.3379	27.101	2	27.1683	27.4139	2	8.48199e+07	1.43951e+08	1.14385e+08	1.50825e+08	1.78816e+08	1.6482e+08	1.44092	0.526993	M	2	1	346	tr|Q4DBM7|Q4DBM7_TRYCC;tr|Q4CQS6|Q4CQS6_TRYCC;tr|Q4DKH8|Q4DKH8_TRYCC	346;346;192	tr|Q4DBM7|Q4DBM7_TRYCC	>tr|Q4DBM7|Q4DBM7_TRYCC Heat shock protein 85, putative OS=Trypanosoma cruzi (strain CL Brener) GN=Tc00.1047053509105.140 PE=3 SV=1;>tr|Q4CQS6|Q4CQS6_TRYCC Heat shock protein 85, putative OS=Trypanosoma cruzi (strain CL Brener) GN=Tc00.1047053507713.30 PE=	1	VFIM(1)DNCEDLCPEWLAFVR
25.2266	25.6509	2	24.1146	23.7534	2	3.92612e+07	5.26854e+07	4.59733e+07	1.81643e+07	1.41412e+07	1.61527e+07	0.35135	-1.50902	M	2	1	1	tr|Q4DUK7|Q4DUK7_TRYCC;tr|Q4DHY1|Q4DHY1_TRYCC	1;1	tr|Q4DUK7|Q4DUK7_TRYCC	>tr|Q4DUK7|Q4DUK7_TRYCC Elongation of fatty acids protein OS=Trypanosoma cruzi (strain CL Brener) GN=Tc00.1047053511245.130 PE=3 SV=1;>tr|Q4DHY1|Q4DHY1_TRYCC Elongation of fatty acids protein OS=Trypanosoma cruzi (strain CL Brener) GN=Tc00.1047053506661.30	1	M(1)EFVQNWDGYAVR
26.0997	25.7253	2	24.9592	25.8931	2	7.19105e+07	5.54737e+07	6.36921e+07	3.26188e+07	6.2316e+07	47467411	0.745264	-0.424177	M	3	1	116	tr|Q4CSK6|Q4CSK6_TRYCC;tr|Q4CLP6|Q4CLP6_TRYCC;tr|Q4CLP5|Q4CLP5_TRYCC;tr|Q4CLT3|Q4CLT3_TRYCC;tr|Q4DTG3|Q4DTG3_TRYCC;tr|Q4E349|Q4E349_TRYCC	116;116;116;116;116;116	tr|Q4CSK6|Q4CSK6_TRYCC	>tr|Q4CSK6|Q4CSK6_TRYCC Uncharacterized protein OS=Trypanosoma cruzi (strain CL Brener) GN=Tc00.1047053509141.40 PE=4 SV=1;>tr|Q4CLP6|Q4CLP6_TRYCC Uncharacterized protein OS=Trypanosoma cruzi (strain CL Brener) GN=Tc00.1047053511687.10 PE=4 SV=1;>tr|Q4CLP5	1	NGEYELSHEFVM(1)PSR
27.0484	27.8119	2	26.2411	27.3644	2	1.38797e+08	2.35622e+08	1.8721e+08	7.93155e+07	1.72785e+08	126050100	0.67331	-0.570657	M	2	1	40	tr|Q4CZ29|Q4CZ29_TRYCC;tr|Q4DKI7|Q4DKI7_TRYCC	40;40	tr|Q4DKI7|Q4DKI7_TRYCC	>tr|Q4CZ29|Q4CZ29_TRYCC Thiol-dependent reductase 1, putative OS=Trypanosoma cruzi (strain CL Brener) GN=Tc00.1047053503419.30 PE=4 SV=1;>tr|Q4DKI7|Q4DKI7_TRYCC Thiol-dependent reductase 1, putative OS=Trypanosoma cruzi (strain CL Brener) GN=Tc00.104705350	1	VTLEEVEVPLGDDM(1)PQWYK
24.5691	25.5825	2	25.9945	26.0448	2	2.48906e+07	5.02458e+07	3.75682e+07	6.68535e+07	6.92255e+07	6.80395e+07	1.81109	0.85686	M	2	1	80	tr|Q4DC38|Q4DC38_TRYCC;tr|Q4CWD6|Q4CWD6_TRYCC	80;80	tr|Q4DC38|Q4DC38_TRYCC	>tr|Q4DC38|Q4DC38_TRYCC 40S ribosomal protein S13, putative OS=Trypanosoma cruzi (strain CL Brener) GN=Tc00.1047053511291.90 PE=3 SV=1;>tr|Q4CWD6|Q4CWD6_TRYCC 40S ribosomal protein S13, putative OS=Trypanosoma cruzi (strain CL Brener) GN=Tc00.1047053510029	1	GM(1)APEIPEDLYCLIK
27.6326	28.828	2	28.2049	28.2075	2	2.08085e+08	4.76533e+08	3.42309e+08	3.094e+08	3.09959e+08	3.09679e+08	0.904678	-0.144523	M	2	1	194	tr|Q4CRF7|Q4CRF7_TRYCC;tr|Q4CRF6|Q4CRF6_TRYCC;tr|Q4CRF5|Q4CRF5_TRYCC;tr|Q4DYF9|Q4DYF9_TRYCC;tr|Q4CXI1|Q4CXI1_TRYCC;tr|Q4CXI2|Q4CXI2_TRYCC	194;201;34;201;201;201	tr|Q4CRF7|Q4CRF7_TRYCC	>tr|Q4CRF7|Q4CRF7_TRYCC Elongation factor 1-alpha OS=Trypanosoma cruzi (strain CL Brener) GN=Tc00.1047053511369.10 PE=3 SV=1;>tr|Q4CRF6|Q4CRF6_TRYCC Elongation factor 1-alpha OS=Trypanosoma cruzi (strain CL Brener) GN=Tc00.1047053511367.370 PE=3 SV=1;>tr|Q	1	FIPISGWQGDNM(1)IDK
27.6841	27.7949	2	27.04	27.3921	2	2.15648e+08	2.32862e+08	2.24255e+08	1.37991e+08	1.76134e+08	1.57063e+08	0.700376	-0.513798	M	2	1	292	tr|Q4CPW6|Q4CPW6_TRYCC;tr|Q4CR09|Q4CR09_TRYCC;tr|Q4CR10|Q4CR10_TRYCC;tr|Q4CYZ5|Q4CYZ5_TRYCC;tr|Q4CYZ6|Q4CYZ6_TRYCC;tr|Q4CYZ4|Q4CYZ4_TRYCC	292;292;292;292;292;155	tr|Q4CYZ5|Q4CYZ5_TRYCC	>tr|Q4CPW6|Q4CPW6_TRYCC Glutamamyl carboxypeptidase, putative OS=Trypanosoma cruzi (strain CL Brener) GN=Tc00.1047053507657.10 PE=4 SV=1;>tr|Q4CR09|Q4CR09_TRYCC Glutamamyl carboxypeptidase, putative OS=Trypanosoma cruzi (strain CL Brener) GN=Tc00.104705351	1	SYVETQLLPAM(1)K
24.0266	24.2755	2	24.3419	23.6403	2	1.70894e+07	2.03074e+07	1.86984e+07	2.12639e+07	1.30749e+07	1.71694e+07	0.918228	-0.123075	M	3	1	124	tr|Q4DB81|Q4DB81_TRYCC;tr|Q4D8V7|Q4D8V7_TRYCC	124;124	tr|Q4DB81|Q4DB81_TRYCC	>tr|Q4DB81|Q4DB81_TRYCC Glycosomal phosphoenolpyruvate carboxykinase, putative OS=Trypanosoma cruzi (strain CL Brener) GN=Tc00.1047053508441.20 PE=3 SV=1;>tr|Q4D8V7|Q4D8V7_TRYCC Glycosomal phosphoenolpyruvate carboxykinase, putative OS=Trypanosoma cruzi (s	1	DM(1)LIVPTPEELATFGEPDYVIYNAGECK
28.0253	28.2651	2	28.0721	28.6783	2	2.73184e+08	322584080	2.97884e+08	2.82192e+08	4.29565e+08	3.55878e+08	1.19469	0.256631	M	2	1	330	tr|Q4DQP2|Q4DQP2_TRYCC	330	tr|Q4DQP2|Q4DQP2_TRYCC	>tr|Q4DQP2|Q4DQP2_TRYCC Tubulin beta chain OS=Trypanosoma cruzi (strain CL Brener) GN=Tc00.1047053506563.40 PE=3 SV=1	1	EVDEQM(1)LNVQNK
26.2624	26.6424	2	28.5607	29.2759	2	8.04952e+07	104751815	9.26235e+07	3.95938e+08	6.50016e+08	5.22977e+08	5.64627	2.4973	M	2	1	253	tr|Q4CRF7|Q4CRF7_TRYCC;tr|Q4CRF6|Q4CRF6_TRYCC;tr|Q4CRF5|Q4CRF5_TRYCC;tr|Q4DYF9|Q4DYF9_TRYCC;tr|Q4CXI1|Q4CXI1_TRYCC;tr|Q4CXI2|Q4CXI2_TRYCC	253;260;93;260;260;260	tr|Q4CRF7|Q4CRF7_TRYCC	>tr|Q4CRF7|Q4CRF7_TRYCC Elongation factor 1-alpha OS=Trypanosoma cruzi (strain CL Brener) GN=Tc00.1047053511369.10 PE=3 SV=1;>tr|Q4CRF6|Q4CRF6_TRYCC Elongation factor 1-alpha OS=Trypanosoma cruzi (strain CL Brener) GN=Tc00.1047053511367.370 PE=3 SV=1;>tr|Q	1	VETGTM(1)KPGDVVTFAPANVTTEVK
26.5863	27.0185	2	26.2748	26.8978	2	1.00757e+08	1.3595e+08	1.18353e+08	8.11901e+07	1.25039e+08	1.03114e+08	0.871242	-0.198854	M	2	1	353	tr|Q4D5C2|Q4D5C2_TRYCC	353	tr|Q4D5C2|Q4D5C2_TRYCC	>tr|Q4D5C2|Q4D5C2_TRYCC Glutamate dehydrogenase OS=Trypanosoma cruzi (strain CL Brener) GN=Tc00.1047053508111.30 PE=3 SV=1	1	AANAGGVAISGLEM(1)SQNAAR
27.7349	27.7914	2	26.3954	26.74	2	223376163	2.32298e+08	2.27837e+08	8.82688e+07	1.12084e+08	100176194	0.439684	-1.18546	M	2	1	255	tr|Q4CZ29|Q4CZ29_TRYCC;tr|Q4DKI7|Q4DKI7_TRYCC	255;255	tr|Q4DKI7|Q4DKI7_TRYCC	>tr|Q4CZ29|Q4CZ29_TRYCC Thiol-dependent reductase 1, putative OS=Trypanosoma cruzi (strain CL Brener) GN=Tc00.1047053503419.30 PE=4 SV=1;>tr|Q4DKI7|Q4DKI7_TRYCC Thiol-dependent reductase 1, putative OS=Trypanosoma cruzi (strain CL Brener) GN=Tc00.104705350	1	NIDLPM(1)LEIDLK
26.3297	27.1167	2	24.6762	25.9357	2	8.43392e+07	1.45526e+08	1.14933e+08	2.68087e+07	6.41835e+07	4.54961e+07	0.395851	-1.33697	M	3	1	165	tr|Q4E0Q0|Q4E0Q0_TRYCC;tr|Q4E3P5|Q4E3P5_TRYCC	165;165	tr|Q4E3P5|Q4E3P5_TRYCC	>tr|Q4E0Q0|Q4E0Q0_TRYCC Pyruvate, phosphate dikinase OS=Trypanosoma cruzi (strain CL Brener) GN=Tc00.1047053506297.190 PE=3 SV=1;>tr|Q4E3P5|Q4E3P5_TRYCC Pyruvate, phosphate dikinase OS=Trypanosoma cruzi (strain CL Brener) GN=Tc00.1047053510101.140 PE=3 SV=	1	EDFEEAIGHM(1)K
28.6785	28.9971	2	27.9968	28.7377	2	4.29624e+08	5.35793e+08	4.82709e+08	2.67841e+08	4.4762e+08	3.5773e+08	0.74109	-0.432279	M	2	1	173	tr|Q4CPW6|Q4CPW6_TRYCC;tr|Q4CR09|Q4CR09_TRYCC;tr|Q4CR10|Q4CR10_TRYCC;tr|Q4CYZ5|Q4CYZ5_TRYCC;tr|Q4CYZ6|Q4CYZ6_TRYCC;tr|Q4CYZ4|Q4CYZ4_TRYCC	173;173;173;173;173;36	tr|Q4CYZ5|Q4CYZ5_TRYCC	>tr|Q4CPW6|Q4CPW6_TRYCC Glutamamyl carboxypeptidase, putative OS=Trypanosoma cruzi (strain CL Brener) GN=Tc00.1047053507657.10 PE=4 SV=1;>tr|Q4CR09|Q4CR09_TRYCC Glutamamyl carboxypeptidase, putative OS=Trypanosoma cruzi (strain CL Brener) GN=Tc00.104705351	1	AEGCIIGEPTGM(1)TVVIAHK
26.0703	25.6519	2	25.9386	26.0209	2	7.04599e+07	5.27219e+07	6.15909e+07	6.43127e+07	6.80881e+07	6.62004e+07	1.07484	0.104122	M	2	1	595	tr|Q4CVR9|Q4CVR9_TRYCC;tr|Q4CVL7|Q4CVL7_TRYCC;tr|Q4CPR7|Q4CPR7_TRYCC;tr|Q4DXG9|Q4DXG9_TRYCC	595;224;145;108	tr|Q4CVR9|Q4CVR9_TRYCC	>tr|Q4CVR9|Q4CVR9_TRYCC Heat shock 70 kDa protein, mitochondrial, putative OS=Trypanosoma cruzi (strain CL Brener) GN=Tc00.1047053507029.30 PE=3 SV=1;>tr|Q4CVL7|Q4CVL7_TRYCC Heat shock 70 kDa protein, mitochondrial, putative (Fragment) OS=Trypanosoma cruzi	1	SM(1)ENPNVTKDELSAATDK
31.4192	31.801	2	29.3727	31.1456	2	2871584760	3741578765	3306581762	6.95126e+08	2375526245	1535326299	0.464324	-1.1068	M	2	1	73	tr|Q4DQP2|Q4DQP2_TRYCC	73	tr|Q4DQP2|Q4DQP2_TRYCC	>tr|Q4DQP2|Q4DQP2_TRYCC Tubulin beta chain OS=Trypanosoma cruzi (strain CL Brener) GN=Tc00.1047053506563.40 PE=3 SV=1	1	AVLIDLEPGTM(1)DSVR
26.3	27.7203	2	26.0443	27.1705	2	82620703	2.21127e+08	1.51874e+08	6.92015e+07	1.51055e+08	1.10128e+08	0.72513	-0.463688	M	3	1	600	tr|Q4D620|Q4D620_TRYCC	600	tr|Q4D620|Q4D620_TRYCC	>tr|Q4D620|Q4D620_TRYCC Glucose-regulated protein 78, putative OS=Trypanosoma cruzi (strain CL Brener) GN=Tc00.1047053506585.40 PE=3 SV=1	1	EAM(1)QFLDDNPNADKEEYDEAR
28.5534	28.8793	2	27.357	27.7761	2	3.9394e+08	4.93782e+08	4.43861e+08	1.71901e+08	2.29847e+08	2.00874e+08	0.45256	-1.14382	M	2	1	342	tr|Q4CWA5|Q4CWA5_TRYCC	342	tr|Q4CWA5|Q4CWA5_TRYCC	>tr|Q4CWA5|Q4CWA5_TRYCC Arginine kinase, putative OS=Trypanosoma cruzi (strain CL Brener) GN=Tc00.1047053507241.30 PE=3 SV=1	1	EM(1)QDGILELIK
26.8267	27.0133	2	23.6735	25.9876	2	1.19026e+08	1.35461e+08	1.27243e+08	1.33793e+07	6.65345e+07	3.99569e+07	0.31402	-1.67107	M	2	1	155	tr|Q4E4L9|Q4E4L9_TRYCC	155	tr|Q4E4L9|Q4E4L9_TRYCC	>tr|Q4E4L9|Q4E4L9_TRYCC Peptidyl-prolyl cis-trans isomerase OS=Trypanosoma cruzi (strain CL Brener) GN=Tc00.1047053506925.300 PE=3 SV=1	1	AM(1)EAVGSQTGK
28.0241	28.341	2	27.9836	28.7604	2	2.72957e+08	3.4001e+08	3.06483e+08	2.65401e+08	4.54719e+08	3.6006e+08	1.17481	0.232429	M	2	1	282	tr|Q4DYF9|Q4DYF9_TRYCC;tr|Q4CXI1|Q4CXI1_TRYCC;tr|Q4CXI2|Q4CXI2_TRYCC	282;282;282	tr|Q4DYF9|Q4DYF9_TRYCC	>tr|Q4DYF9|Q4DYF9_TRYCC Elongation factor 1-alpha OS=Trypanosoma cruzi (strain CL Brener) GN=Tc00.1047053511367.360 PE=3 SV=1;>tr|Q4CXI1|Q4CXI1_TRYCC Elongation factor 1-alpha OS=Trypanosoma cruzi (strain CL Brener) GN=Tc00.1047053510119.20 PE=3 SV=1;>tr|Q	1	SIEM(1)HHEQLAEATPGDNVGFNVK
27.2183	26.4998	2	26.9707	28.15	2	1.56144e+08	9.48931e+07	1.25518e+08	1.31519e+08	2.97848e+08	2.14684e+08	1.71037	0.774312	M	3	1	193	tr|Q4DMK9|Q4DMK9_TRYCC	193	tr|Q4DMK9|Q4DMK9_TRYCC	>tr|Q4DMK9|Q4DMK9_TRYCC 40S ribosomal protein S3, putative OS=Trypanosoma cruzi (strain CL Brener) GN=Tc00.1047053504021.109 PE=4 SV=1	1	SM(1)QNEEEILPDVITVLEPK
26.3751	26.5975	2	25.5281	25.0522	2	8.70355e+07	1.01542e+08	9.42887e+07	4.83865e+07	3.47907e+07	4.15886e+07	0.441077	-1.1809	M	2	1	467	tr|Q4E0Q0|Q4E0Q0_TRYCC;tr|Q4E3P5|Q4E3P5_TRYCC	467;467	tr|Q4E3P5|Q4E3P5_TRYCC	>tr|Q4E0Q0|Q4E0Q0_TRYCC Pyruvate, phosphate dikinase OS=Trypanosoma cruzi (strain CL Brener) GN=Tc00.1047053506297.190 PE=3 SV=1;>tr|Q4E3P5|Q4E3P5_TRYCC Pyruvate, phosphate dikinase OS=Trypanosoma cruzi (strain CL Brener) GN=Tc00.1047053510101.140 PE=3 SV=	1	LETSPEDLAGM(1)DAAR
27.8768	28.3393	2	28.7045	29.2058	2	2.46464e+08	3.39609e+08	293036420	4.37437e+08	6.19187e+08	5.28312e+08	1.80289	0.85031	M	3	1	215	tr|Q4CRF7|Q4CRF7_TRYCC;tr|Q4CRF6|Q4CRF6_TRYCC;tr|Q4CRF5|Q4CRF5_TRYCC;tr|Q4DYF9|Q4DYF9_TRYCC;tr|Q4CXI1|Q4CXI1_TRYCC;tr|Q4CXI2|Q4CXI2_TRYCC	215;222;55;222;222;222	tr|Q4CRF7|Q4CRF7_TRYCC	>tr|Q4CRF7|Q4CRF7_TRYCC Elongation factor 1-alpha OS=Trypanosoma cruzi (strain CL Brener) GN=Tc00.1047053511369.10 PE=3 SV=1;>tr|Q4CRF6|Q4CRF6_TRYCC Elongation factor 1-alpha OS=Trypanosoma cruzi (strain CL Brener) GN=Tc00.1047053511367.370 PE=3 SV=1;>tr|Q	1	GPTLLEALDM(1)LEPPVRPSDKPLR
26.9998	27.1847	2	26.2569	27.4339	2	1.34199e+08	1.52549e+08	1.43374e+08	8.01889e+07	1.81312e+08	130750524	0.911953	-0.132969	M	2	1	290	tr|Q4DTA6|Q4DTA6_TRYCC;tr|Q4E4V7|Q4E4V7_TRYCC	40;290	tr|Q4E4V7|Q4E4V7_TRYCC	>tr|Q4DTA6|Q4DTA6_TRYCC Prostaglandin F2alpha synthase (Fragment) OS=Trypanosoma cruzi (strain CL Brener) GN=Tc00.1047053506147.9 PE=4 SV=1;>tr|Q4E4V7|Q4E4V7_TRYCC Prostaglandin F2alpha synthase OS=Trypanosoma cruzi (strain CL Brener) GN=Tc00.1047053508461	1	GDM(1)VNQQIGDVVAWVR
26.5005	27.3319	2	27.0991	27.3503	2	9.49392e+07	1.68936e+08	1.31937e+08	1.43761e+08	171104208	1.57433e+08	1.19324	0.254881	M	2	1	363	tr|Q4CNI8|Q4CNI8_TRYCC;tr|Q4E355|Q4E355_TRYCC	363;363	tr|Q4CNI8|Q4CNI8_TRYCC	>tr|Q4CNI8|Q4CNI8_TRYCC Uncharacterized protein OS=Trypanosoma cruzi (strain CL Brener) GN=Tc00.1047053509139.10 PE=4 SV=1;>tr|Q4E355|Q4E355_TRYCC Uncharacterized protein OS=Trypanosoma cruzi (strain CL Brener) GN=Tc00.1047053508741.170 PE=4 SV=1	1	WM(1)TGTDVVAELLDLPAK
25.8353	26.0829	2	25.2788	24.5302	2	5.98688e+07	7.1078e+07	6.54734e+07	4.07077e+07	2.42285e+07	3.24681e+07	0.495898	-1.01189	M	2	1	222	tr|Q4CVI0|Q4CVI0_TRYCC;tr|Q4E4E7|Q4E4E7_TRYCC;tr|Q4DPG7|Q4DPG7_TRYCC	222;222;222	tr|Q4E4E7|Q4E4E7_TRYCC	>tr|Q4CVI0|Q4CVI0_TRYCC Tyrosine aminotransferase OS=Trypanosoma cruzi (strain CL Brener) GN=Tc00.1047053510795.10 PE=4 SV=1;>tr|Q4E4E7|Q4E4E7_TRYCC Tyrosine aminotransferase OS=Trypanosoma cruzi (strain CL Brener) GN=Tc00.1047053510187.30 PE=4 SV=1;>tr|Q4	1	LPLFSDEIYAGM(1)VFK
27.6566	27.9555	2	27.1502	27.8263	2	2.11576e+08	2.60282e+08	235928918	1.48945e+08	2.37986e+08	1.93465e+08	0.820015	-0.286279	M	3	1	275	tr|Q4CRF7|Q4CRF7_TRYCC;tr|Q4CRF6|Q4CRF6_TRYCC;tr|Q4CRF5|Q4CRF5_TRYCC	275;282;115	tr|Q4CRF7|Q4CRF7_TRYCC	>tr|Q4CRF7|Q4CRF7_TRYCC Elongation factor 1-alpha OS=Trypanosoma cruzi (strain CL Brener) GN=Tc00.1047053511369.10 PE=3 SV=1;>tr|Q4CRF6|Q4CRF6_TRYCC Elongation factor 1-alpha OS=Trypanosoma cruzi (strain CL Brener) GN=Tc00.1047053511367.370 PE=3 SV=1;>tr|Q	1	SIEM(1)HHEQLVEATPGDNVGFNVK
23.5774	23.8399	2	24.6153	25.8907	2	1.25171e+07	1.5015e+07	1.37661e+07	2.57006e+07	6.22125e+07	4.39565e+07	3.19311	1.67496	M	2	1	5	tr|Q4DJZ6|Q4DJZ6_TRYCC;tr|Q4CTG9|Q4CTG9_TRYCC	5;21	tr|Q4DJZ6|Q4DJZ6_TRYCC	>tr|Q4DJZ6|Q4DJZ6_TRYCC Ribosomal protein L15 OS=Trypanosoma cruzi (strain CL Brener) GN=Tc00.1047053506945.290 PE=3 SV=1;>tr|Q4CTG9|Q4CTG9_TRYCC Ribosomal protein L15 OS=Trypanosoma cruzi (strain CL Brener) GN=Tc00.1047053510767.10 PE=1 SV=1	1	GAFM(1)YLNELWK
25.881	25.6392	2	24.8244	25.5894	2	6.17956e+07	5.22599e+07	5.70277e+07	2.97091e+07	5.04867e+07	4.00979e+07	0.70313	-0.508137	M	2	1	603	tr|Q4CST4|Q4CST4_TRYCC	603	tr|Q4CST4|Q4CST4_TRYCC	>tr|Q4CST4|Q4CST4_TRYCC Uncharacterized protein OS=Trypanosoma cruzi (strain CL Brener) GN=Tc00.1047053506647.20 PE=4 SV=1	1	QNAQRSRGNM(1)HPTASK
28.1932	29.1231	2	26.8775	26.7388	2	306901403	5.84691e+08	445796375	1.23292e+08	1.1199e+08	1.17641e+08	0.26389	-1.92199	M	2	1	281	tr|Q4CT44|Q4CT44_TRYCC;tr|Q4CMQ6|Q4CMQ6_TRYCC	281;281	tr|Q4CT44|Q4CT44_TRYCC	>tr|Q4CT44|Q4CT44_TRYCC Uncharacterized protein OS=Trypanosoma cruzi (strain CL Brener) GN=Tc00.1047053503555.20 PE=4 SV=1;>tr|Q4CMQ6|Q4CMQ6_TRYCC Uncharacterized protein OS=Trypanosoma cruzi (strain CL Brener) GN=Tc00.1047053504507.10 PE=4 SV=1	1	VM(1)GFYNGRQGAVRAVQDR
28.3162	28.8052	2	28.3948	30.006	2	3.34215e+08	4.69061e+08	4.01638e+08	3.52928e+08	1078216689	7.15573e+08	1.78164	0.833203	M	2	1	805	tr|Q4D432|Q4D432_TRYCC	805	tr|Q4D432|Q4D432_TRYCC	>tr|Q4D432|Q4D432_TRYCC Uncharacterized protein OS=Trypanosoma cruzi (strain CL Brener) GN=Tc00.1047053510599.40 PE=4 SV=1	1	SEM(1)ENIRAQRNK
25.8179	25.705	2	24.7824	25.3314	2	5.9151e+07	5.46986e+07	5.69248e+07	2.88566e+07	4.22193e+07	3.5538e+07	0.624297	-0.679696	M	2	1	1	tr|Q4D6R9|Q4D6R9_TRYCC;tr|Q4DF06|Q4DF06_TRYCC	1;1	tr|Q4D6R9|Q4D6R9_TRYCC	>tr|Q4D6R9|Q4D6R9_TRYCC Retrotransposon hot spot (RHS) protein, putative (Fragment) OS=Trypanosoma cruzi (strain CL Brener) GN=Tc00.1047053509427.98 PE=4 SV=1;>tr|Q4DF06|Q4DF06_TRYCC Retrotransposon hot spot (RHS) protein, putative OS=Trypanosoma cruzi (st	1	M(1)PGNQASAVPQGYIRR
29.6977	29.8532	2	28.7047	28.2592	2	8.7076e+08	969859148	9.2031e+08	4.37498e+08	3.21268e+08	379382593	0.412234	-1.27847	M	2	0.999996	1	tr|Q4DVU1|Q4DVU1_TRYCC	1	tr|Q4DVU1|Q4DVU1_TRYCC	>tr|Q4DVU1|Q4DVU1_TRYCC Uncharacterized protein OS=Trypanosoma cruzi (strain CL Brener) GN=Tc00.1047053511751.210 PE=4 SV=1	1	M(1)ITHWMAAAK
26.9512	27.7079	2	29.3481	30.4319	2	1.29754e+08	2.19235e+08	1.74494e+08	6.83374e+08	1448487411	1065930677	6.10869	2.61086	M	2	0.979332	4	tr|Q4E1S9|Q4E1S9_TRYCC	4	tr|Q4E1S9|Q4E1S9_TRYCC	>tr|Q4E1S9|Q4E1S9_TRYCC Uncharacterized protein OS=Trypanosoma cruzi (strain CL Brener) GN=Tc00.1047053506855.150 PE=4 SV=1	1	M(0.021)REM(0.979)HPAIAELKR
25.9981	27.8259	2	27.079	26.4516	2	6.70205e+07	2.3792e+08	1.5247e+08	1.41772e+08	9.17751e+07	116773696	0.765879	-0.384812	M	2	1	1	tr|Q4D7X6|Q4D7X6_TRYCC	1	tr|Q4D7X6|Q4D7X6_TRYCC	>tr|Q4D7X6|Q4D7X6_TRYCC Uncharacterized protein OS=Trypanosoma cruzi (strain CL Brener) GN=Tc00.1047053511317.20 PE=4 SV=1	1	M(1)SLRRFFNVGATGK
27.1289	27.9358	2	26.4294	27.2062	2	1.46762e+08	2.56752e+08	2.01757e+08	9.03737e+07	154839681	1.22607e+08	0.607695	-0.71858	M	3	1	290	tr|Q4DGF2|Q4DGF2_TRYCC;tr|Q4DZU8|Q4DZU8_TRYCC	290;290	tr|Q4DGF2|Q4DGF2_TRYCC	>tr|Q4DGF2|Q4DGF2_TRYCC Cullin-like protein, putative OS=Trypanosoma cruzi (strain CL Brener) GN=Tc00.1047053509715.30 PE=3 SV=1;>tr|Q4DZU8|Q4DZU8_TRYCC Cullin-like protein, putative OS=Trypanosoma cruzi (strain CL Brener) GN=Tc00.1047053510105.40 PE=3 SV=	1	VNESEAFLDM(1)IVGTAKK
26.2315	26.8382	2	26.7801	27.3218	2	7.87895e+07	1.19978e+08	9.9384e+07	115242690	1.67757e+08	1.415e+08	1.42377	0.509717	M	2	1	2157	tr|Q4DT81|Q4DT81_TRYCC	2157	tr|Q4DT81|Q4DT81_TRYCC	>tr|Q4DT81|Q4DT81_TRYCC Endosomal trafficking protein RME-8, putative OS=Trypanosoma cruzi (strain CL Brener) GN=Tc00.1047053511511.10 PE=4 SV=1	1	TM(1)VAVQDPLHGPQLEAILADSK
23.1981	25.6598	2	22.8802	23.9594	2	9.6233e+06	5.30114e+07	3.13174e+07	7.72016e+06	1.63117e+07	1.20159e+07	0.383682	-1.38202	M	1	1	582	tr|Q4CZY9|Q4CZY9_TRYCC;tr|Q4D7R8|Q4D7R8_TRYCC	582;582	tr|Q4CZY9|Q4CZY9_TRYCC	>tr|Q4CZY9|Q4CZY9_TRYCC Uncharacterized protein OS=Trypanosoma cruzi (strain CL Brener) GN=Tc00.1047053506481.20 PE=4 SV=1;>tr|Q4D7R8|Q4D7R8_TRYCC Uncharacterized protein OS=Trypanosoma cruzi (strain CL Brener) GN=Tc00.1047053511295.50 PE=4 SV=1	1	DM(1)KSVNDK
27.2469	27.1103	2	26.2521	27.0582	2	1.5927e+08	1.44882e+08	1.52076e+08	7.99226e+07	1.39743e+08	1.09833e+08	0.722223	-0.469483	M	3	1	439	tr|Q4DD25|Q4DD25_TRYCC	439	tr|Q4DD25|Q4DD25_TRYCC	>tr|Q4DD25|Q4DD25_TRYCC Uncharacterized protein OS=Trypanosoma cruzi (strain CL Brener) GN=Tc00.1047053507143.30 PE=4 SV=1	1	YNALFSAM(1)ESRFFGALASAVK
25.7575	25.162	2	25.371	26.0754	2	5.67257e+07	3.75419e+07	4.71338e+07	4.33942e+07	7.07095e+07	5.70518e+07	1.21042	0.27551	M	2	1	129	tr|Q4DS41|Q4DS41_TRYCC	129	tr|Q4DS41|Q4DS41_TRYCC	>tr|Q4DS41|Q4DS41_TRYCC Uncharacterized protein OS=Trypanosoma cruzi (strain CL Brener) GN=Tc00.1047053506475.110 PE=4 SV=1	1	M(1)NRRDNSYNVVAATR
25.6024	26.6384	2	25.4624	26.5269	2	5.09437e+07	1.04462e+08	7.77027e+07	4.62324e+07	9.66925e+07	7.14624e+07	0.91969	-0.120781	M	2	1	276	tr|Q4DPK6|Q4DPK6_TRYCC;tr|Q4CPE3|Q4CPE3_TRYCC	276;355	tr|Q4DPK6|Q4DPK6_TRYCC	>tr|Q4DPK6|Q4DPK6_TRYCC Surface protease GP63, putative (Fragment) OS=Trypanosoma cruzi (strain CL Brener) GN=Tc00.1047053506613.9 PE=4 SV=1;>tr|Q4CPE3|Q4CPE3_TRYCC Surface protease GP63, putative OS=Trypanosoma cruzi (strain CL Brener) GN=Tc00.10470535040	1	KM(1)VAGNHVQAK
25.2429	25.3554	2	25.5272	26.0911	2	3.97073e+07	4.29275e+07	4.13174e+07	4.83563e+07	7.14832e+07	5.99197e+07	1.45023	0.536281	M	3	1	322	tr|Q4D4R5|Q4D4R5_TRYCC	322	tr|Q4D4R5|Q4D4R5_TRYCC	>tr|Q4D4R5|Q4D4R5_TRYCC Uncharacterized protein OS=Trypanosoma cruzi (strain CL Brener) GN=Tc00.1047053504163.90 PE=4 SV=1	1	LTEVNPM(1)APAVPPIPLPERNK
27.4873	27.413	2	27.1153	26.1462	2	1.88149e+08	1.78704e+08	1.83427e+08	1.45385e+08	7.42661e+07	109825377	0.598743	-0.739992	M	3	0.998526	589	tr|Q4DF31|Q4DF31_TRYCC	589	tr|Q4DF31|Q4DF31_TRYCC	>tr|Q4DF31|Q4DF31_TRYCC Trans-sialidase, putative OS=Trypanosoma cruzi (strain CL Brener) GN=Tc00.1047053508121.150 PE=4 SV=1	1	EGTIPLM(0.999)GAKM(0.001)NDAGNSILFGLSYDNK
28.2671	28.8519	2	29.169	24.5032	2	3.23032e+08	484492805	4.03762e+08	6.03593e+08	2.37793e+07	3.13686e+08	0.776908	-0.364185	M	3	0.998202	479	tr|Q4DZG5|Q4DZG5_TRYCC;tr|Q4DN06|Q4DN06_TRYCC	479;479	tr|Q4DZG5|Q4DZG5_TRYCC	>tr|Q4DZG5|Q4DZG5_TRYCC Uncharacterized protein OS=Trypanosoma cruzi (strain CL Brener) GN=Tc00.1047053508641.310 PE=4 SV=1;>tr|Q4DN06|Q4DN06_TRYCC Uncharacterized protein OS=Trypanosoma cruzi (strain CL Brener) GN=Tc00.1047053506203.90 PE=4 SV=1	1	M(0.002)QKQIATAGFM(0.998)EAQLQAAR
25.5293	25.9357	2	25.8251	26.6584	2	4.84267e+07	6.41835e+07	5.63051e+07	5.9447e+07	1.0592e+08	8.26835e+07	1.46849	0.554333	M	2	1	154	tr|Q4CZ46|Q4CZ46_TRYCC	154	tr|Q4CZ46|Q4CZ46_TRYCC	>tr|Q4CZ46|Q4CZ46_TRYCC COP-coated vesicle membrane protein p24, putative OS=Trypanosoma cruzi (strain CL Brener) GN=Tc00.1047053503987.10 PE=3 SV=1	1	SLM(1)RIQQGLREVQEVQR
27.7801	28.0067	2	26.7894	27.7305	2	2.30485e+08	2.69685e+08	2.50085e+08	1.15988e+08	2.22696e+08	1.69342e+08	0.677137	-0.56248	M	3	1	730	tr|Q4DKU0|Q4DKU0_TRYCC	730	tr|Q4DKU0|Q4DKU0_TRYCC	>tr|Q4DKU0|Q4DKU0_TRYCC DNA polymerase OS=Trypanosoma cruzi (strain CL Brener) GN=Tc00.1047053509769.130 PE=3 SV=1	1	RSVSSVVQQAAQSQLSM(1)LLSR
28.9611	29.2791	2	26.2815	26.4357	2	5.22588e+08	6.51459e+08	5.87024e+08	8.1568e+07	9.07692e+07	8.61686e+07	0.146789	-2.76818	M	2	1	197	tr|Q4DGH8|Q4DGH8_TRYCC	197	tr|Q4DGH8|Q4DGH8_TRYCC	>tr|Q4DGH8|Q4DGH8_TRYCC Uncharacterized protein OS=Trypanosoma cruzi (strain CL Brener) GN=Tc00.1047053511423.140 PE=4 SV=1	1	AM(1)SQAETQKPIETVQK
25.5705	26.6262	2	24.3004	26.2333	2	4.98296e+07	1.03582e+08	7.67059e+07	2.06609e+07	7.88879e+07	4.97744e+07	0.648899	-0.623934	M	2	1	559	tr|Q4E4I6|Q4E4I6_TRYCC	559	tr|Q4E4I6|Q4E4I6_TRYCC	>tr|Q4E4I6|Q4E4I6_TRYCC Uncharacterized protein OS=Trypanosoma cruzi (strain CL Brener) GN=Tc00.1047053506885.110 PE=4 SV=1	2	LLNLM(1)ETAIGTAM(1)QQNR
25.0356	25.0117	2	23.9037	26.462	2	3.43927e+07	3.38277e+07	3.41102e+07	1.56939e+07	9.24391e+07	5.40665e+07	1.58505	0.664532	M	2	1	619	tr|Q4DA74|Q4DA74_TRYCC	619	tr|Q4DA74|Q4DA74_TRYCC	>tr|Q4DA74|Q4DA74_TRYCC Uncharacterized protein OS=Trypanosoma cruzi (strain CL Brener) GN=Tc00.1047053510339.40 PE=4 SV=1	2	M(1)LGM(1)LRIFYTR
26.0716	26.4191	2	24.0133	25.4786	2	7.05235e+07	8.97308e+07	8.01271e+07	1.69326e+07	4.67544e+07	3.18435e+07	0.397412	-1.33129	M	2	1	166	tr|Q4DYI6|Q4DYI6_TRYCC	166	tr|Q4DYI6|Q4DYI6_TRYCC	>tr|Q4DYI6|Q4DYI6_TRYCC LA RNA binding protein, putative OS=Trypanosoma cruzi (strain CL Brener) GN=Tc00.1047053511367.60 PE=4 SV=1	2	ASPPM(1)HNGVQLTVEM(1)KK
26.4198	26.7872	2	24.0484	26.4311	2	8.97744e+07	1.15811e+08	1.02793e+08	1.73496e+07	9.04803e+07	5.39149e+07	0.524501	-0.930982	M	2	1	466	tr|Q4DE64|Q4DE64_TRYCC;tr|Q4DQ13|Q4DQ13_TRYCC	466;466	tr|Q4DE64|Q4DE64_TRYCC	>tr|Q4DE64|Q4DE64_TRYCC DNA topoisomerase IA, putative OS=Trypanosoma cruzi (strain CL Brener) GN=Tc00.1047053506493.80 PE=4 SV=1;>tr|Q4DQ13|Q4DQ13_TRYCC DNA topoisomerase IA, putative OS=Trypanosoma cruzi (strain CL Brener) GN=Tc00.1047053510121.160 PE=4	2	RNTLASFM(1)IPM(1)K
24.1991	25.7878	2	25.2578	25.9406	2	1.92599e+07	5.79297e+07	3.85948e+07	4.01195e+07	6.44019e+07	5.22607e+07	1.35409	0.437319	M	2	0.755921	88	tr|Q4DK84|Q4DK84_TRYCC	88	tr|Q4DK84|Q4DK84_TRYCC	>tr|Q4DK84|Q4DK84_TRYCC Uncharacterized protein OS=Trypanosoma cruzi (strain CL Brener) GN=Tc00.1047053509601.20 PE=4 SV=1	2	RALLNM(0.989)HSLPM(0.255)NKM(0.756)NK
25.7103	26.2354	2	23.4051	25.2112	2	5.48999e+07	7.90028e+07	6.69513e+07	1.1108e+07	3.88443e+07	2.49762e+07	0.37305	-1.42256	M	2	1	120	tr|Q4CLK9|Q4CLK9_TRYCC;tr|Q4CRG4|Q4CRG4_TRYCC	120;120	tr|Q4CLK9|Q4CLK9_TRYCC	>tr|Q4CLK9|Q4CLK9_TRYCC Uncharacterized protein (Fragment) OS=Trypanosoma cruzi (strain CL Brener) GN=Tc00.1047053430539.10 PE=4 SV=1;>tr|Q4CRG4|Q4CRG4_TRYCC Uncharacterized protein (Fragment) OS=Trypanosoma cruzi (strain CL Brener) GN=Tc00.1047053508557.2	2	RTFDM(1)M(1)LSYGTR
28.8743	29.3753	2	29.9256	28.8713	2	4.92074e+08	6.9638e+08	5.94227e+08	1019772364	4.91052e+08	7.55412e+08	1.27125	0.346249	M	2	1	68	tr|Q4DXK4|Q4DXK4_TRYCC;tr|Q4DCV2|Q4DCV2_TRYCC	68;68	tr|Q4DXK4|Q4DXK4_TRYCC	>tr|Q4DXK4|Q4DXK4_TRYCC Uncharacterized protein OS=Trypanosoma cruzi (strain CL Brener) GN=Tc00.1047053506195.220 PE=4 SV=1;>tr|Q4DCV2|Q4DCV2_TRYCC Uncharacterized protein OS=Trypanosoma cruzi (strain CL Brener) GN=Tc00.1047053506407.110 PE=4 SV=1	2	CAM(1)RKLLM(1)QR
25.3295	25.7878	2	25.2578	25.9406	2	4.21638e+07	5.79297e+07	5.00467e+07	4.01195e+07	6.44019e+07	5.22607e+07	1.04424	0.0624506	M	2	0.996172	80	tr|Q4DK84|Q4DK84_TRYCC	80	tr|Q4DK84|Q4DK84_TRYCC	>tr|Q4DK84|Q4DK84_TRYCC Uncharacterized protein OS=Trypanosoma cruzi (strain CL Brener) GN=Tc00.1047053509601.20 PE=4 SV=1	2	RALLNM(0.996)HSLPM(0.413)NKM(0.591)NK
24.5149	23.7708	2		23.2558	1	2.39729e+07	1.43128e+07	1.91428e+07		1.0016e+07	1.0016e+07	0.523224	-0.934501	M	2	1	459	tr|Q4DD33|Q4DD33_TRYCC;tr|Q4DWL8|Q4DWL8_TRYCC	459;459	tr|Q4DWL8|Q4DWL8_TRYCC	>tr|Q4DD33|Q4DD33_TRYCC Dihydrolipoyl dehydrogenase OS=Trypanosoma cruzi (strain CL Brener) GN=Tc00.1047053511025.110 PE=3 SV=1;>tr|Q4DWL8|Q4DWL8_TRYCC Dihydrolipoyl dehydrogenase OS=Trypanosoma cruzi (strain CL Brener) GN=Tc00.1047053507089.270 PE=3 SV=1	1	TCHAHPTM(1)SEALK
26.2421	25.6769	2	24.3487		1	7.93705e+07	5.36435e+07	6.6507e+07	2.13643e+07		2.13643e+07	0.321234	-1.6383	M	2	1	53	tr|Q4CSK6|Q4CSK6_TRYCC;tr|Q4CLP6|Q4CLP6_TRYCC;tr|Q4CLP5|Q4CLP5_TRYCC;tr|Q4CLT3|Q4CLT3_TRYCC;tr|Q4DTG3|Q4DTG3_TRYCC;tr|Q4E349|Q4E349_TRYCC	53;53;53;53;53;53	tr|Q4CSK6|Q4CSK6_TRYCC	>tr|Q4CSK6|Q4CSK6_TRYCC Uncharacterized protein OS=Trypanosoma cruzi (strain CL Brener) GN=Tc00.1047053509141.40 PE=4 SV=1;>tr|Q4CLP6|Q4CLP6_TRYCC Uncharacterized protein OS=Trypanosoma cruzi (strain CL Brener) GN=Tc00.1047053511687.10 PE=4 SV=1;>tr|Q4CLP5	1	LFVNPM(1)ATSDGK
27.4026	27.9495	2	26.666		1	1.77421e+08	2.59202e+08	2.18311e+08	106479466		106479466	0.487742	-1.03581	M	2	1	168	tr|Q4DAZ6|Q4DAZ6_TRYCC;tr|Q4CWF4|Q4CWF4_TRYCC;tr|Q4DTM8|Q4DTM8_TRYCC;tr|Q4DTM9|Q4DTM9_TRYCC	165;165;168;168	tr|Q4DTM8|Q4DTM8_TRYCC	>tr|Q4DAZ6|Q4DAZ6_TRYCC Heat shock 70 kDa protein, putative (Fragment) OS=Trypanosoma cruzi (strain CL Brener) GN=Tc00.1047053506135.9 PE=3 SV=1;>tr|Q4CWF4|Q4CWF4_TRYCC Heat shock 70 kDa protein, putative (Fragment) OS=Trypanosoma cruzi (strain CL Brener)	1	DAGTIAGM(1)EVLR
25.0534	24.6367	2	24.7436		1	3.48197e+07	2.60847e+07	3.04522e+07	2.80909e+07		2.80909e+07	0.922459	-0.116443	M	2	1	60	tr|Q4DY23|Q4DY23_TRYCC;tr|Q4E5I9|Q4E5I9_TRYCC	60;60	tr|Q4E5I9|Q4E5I9_TRYCC	>tr|Q4DY23|Q4DY23_TRYCC Alcohol dehydrogenase, putative OS=Trypanosoma cruzi (strain CL Brener) GN=Tc00.1047053506357.50 PE=4 SV=1;>tr|Q4E5I9|Q4E5I9_TRYCC Alcohol dehydrogenase, putative OS=Trypanosoma cruzi (strain CL Brener) GN=Tc00.1047053511277.60 PE=4	1	AGILETVM(1)DVLK
25.146	26.1201	2		23.824	1	3.71279e+07	7.29346e+07	5.50312e+07		1.48504e+07	1.48504e+07	0.269854	-1.88975	M	2	1	42	tr|Q4D059|Q4D059_TRYCC;tr|Q4DAR1|Q4DAR1_TRYCC	42;42	tr|Q4DAR1|Q4DAR1_TRYCC	>tr|Q4D059|Q4D059_TRYCC Uncharacterized protein OS=Trypanosoma cruzi (strain CL Brener) GN=Tc00.1047053510347.29 PE=1 SV=1;>tr|Q4DAR1|Q4DAR1_TRYCC Uncharacterized protein OS=Trypanosoma cruzi (strain CL Brener) GN=Tc00.1047053503925.6 PE=4 SV=1	1	VNDTPEEEGM(1)PLR
27.953	26.6103	2		28.134	1	2.59831e+08	1.02447e+08	1.81139e+08		294562799	294562799	1.62617	0.701478	M	3	1	72	tr|Q4E4N4|Q4E4N4_TRYCC	72	tr|Q4E4N4|Q4E4N4_TRYCC	>tr|Q4E4N4|Q4E4N4_TRYCC Eukaryotic translation initiation factor 5A OS=Trypanosoma cruzi (strain CL Brener) GN=Tc00.1047053506925.120 PE=3 SV=1	1	M(1)EDQAPTTHNVDVPFVK
26.4982	25.6976	2		26.7479	1	9.47879e+07	5.44187e+07	7.46033e+07		1.12699e+08	1.12699e+08	1.51064	0.595163	M	4	1	100	tr|Q4CW64|Q4CW64_TRYCC	100	tr|Q4CW64|Q4CW64_TRYCC	>tr|Q4CW64|Q4CW64_TRYCC Calpain-like cysteine peptidase, putative OS=Trypanosoma cruzi (strain CL Brener) GN=Tc00.1047053509003.30 PE=4 SV=1	1	LESGEHLATIVVHPCETEM(1)FIEGR
25.9998	26.6606	2	25.561		1	6.70996e+07	1.06082e+08	8.65906e+07	4.95026e+07		4.95026e+07	0.571685	-0.806707	M	2	1	275	tr|Q4CYP2|Q4CYP2_TRYCC;tr|Q4D7M6|Q4D7M6_TRYCC	275;275	tr|Q4D7M6|Q4D7M6_TRYCC	>tr|Q4CYP2|Q4CYP2_TRYCC 3-ketoacyl-CoA thiolase, putative OS=Trypanosoma cruzi (strain CL Brener) GN=Tc00.1047053509463.30 PE=3 SV=1;>tr|Q4D7M6|Q4D7M6_TRYCC 3-ketoacyl-CoA thiolase, putative OS=Trypanosoma cruzi (strain CL Brener) GN=Tc00.1047053510507.20	1	M(1)GISPNDSSLVEIK
25.2663	24.907	2	24.2473		1	4.03566e+07	3.14597e+07	3.59081e+07	1.99143e+07		1.99143e+07	0.55459	-0.850507	M	2	1	216	tr|Q4DGG5|Q4DGG5_TRYCC;tr|Q4DKH4|Q4DKH4_TRYCC	216;216	tr|Q4DGG5|Q4DGG5_TRYCC	>tr|Q4DGG5|Q4DGG5_TRYCC Vacuolar-type proton translocating pyrophosphatase 1, putative OS=Trypanosoma cruzi (strain CL Brener) GN=Tc00.1047053510773.20 PE=3 SV=1;>tr|Q4DKH4|Q4DKH4_TRYCC Vacuolar-type proton translocating pyrophosphatase 1, putative OS=Tryp	1	TAVM(1)ATEGSEEGDQSLGFAK
25.4228	25.3621	2		25.7934	1	4.49806e+07	4.31274e+07	4.4054e+07		5.8155e+07	5.8155e+07	1.32008	0.400631	M	2	1	168	tr|Q4DKQ2|Q4DKQ2_TRYCC	168	tr|Q4DKQ2|Q4DKQ2_TRYCC	>tr|Q4DKQ2|Q4DKQ2_TRYCC Acyl carrier protein OS=Trypanosoma cruzi (strain CL Brener) GN=Tc00.1047053511867.140 PE=3 SV=1	1	IQSIPDAVEYISQNPM(1)AK
24.8692	26.3954	2		24.4468	1	3.06461e+07	8.82688e+07	5.94574e+07		2.28676e+07	2.28676e+07	0.384604	-1.37855	M	2	0.999744	322	tr|Q4E0Q0|Q4E0Q0_TRYCC;tr|Q4E3P5|Q4E3P5_TRYCC	322;322	tr|Q4E3P5|Q4E3P5_TRYCC	>tr|Q4E0Q0|Q4E0Q0_TRYCC Pyruvate, phosphate dikinase OS=Trypanosoma cruzi (strain CL Brener) GN=Tc00.1047053506297.190 PE=3 SV=1;>tr|Q4E3P5|Q4E3P5_TRYCC Pyruvate, phosphate dikinase OS=Trypanosoma cruzi (strain CL Brener) GN=Tc00.1047053510101.140 PE=3 SV=	1	YPSM(1)EETMPENYR
25.136	24.5641	2	22.8735		1	3.68714e+07	2.48045e+07	3.0838e+07	7.68439e+06		7.68439e+06	0.249186	-2.0047	M	3	1	330	tr|Q4DDX3|Q4DDX3_TRYCC	330	tr|Q4DDX3|Q4DDX3_TRYCC	>tr|Q4DDX3|Q4DDX3_TRYCC Calreticulin, putative OS=Trypanosoma cruzi (strain CL Brener) GN=Tc00.1047053509011.40 PE=3 SV=1	1	DIM(1)IGDDLKEVLELVEK
22.1747	24.1271	2	25.076		1	4.73424e+06	1.83223e+07	1.15283e+07	3.53694e+07		3.53694e+07	3.06806	1.61733	M	3	0.999997	260	tr|Q4CQF8|Q4CQF8_TRYCC;tr|Q4DKD0|Q4DKD0_TRYCC;tr|Q4CQF9|Q4CQF9_TRYCC	260;260;260	tr|Q4CQF8|Q4CQF8_TRYCC	>tr|Q4CQF8|Q4CQF8_TRYCC Hexose transporter, putative (Fragment) OS=Trypanosoma cruzi (strain CL Brener) GN=Tc00.1047053508551.39 PE=3 SV=1;>tr|Q4DKD0|Q4DKD0_TRYCC Hexose transporter, putative OS=Trypanosoma cruzi (strain CL Brener) GN=Tc00.1047053506355.10	1	M(1)QGYCAFSTLLSVLMVALGIFLGESK
26.1359	26.411	2		23.8011	1	7.37377e+07	8.92284e+07	8.14831e+07		1.46166e+07	1.46166e+07	0.179381	-2.4789	M	2	1	46	tr|Q4E4L7|Q4E4L7_TRYCC	46	tr|Q4E4L7|Q4E4L7_TRYCC	>tr|Q4E4L7|Q4E4L7_TRYCC Isocitrate dehydrogenase [NADP] OS=Trypanosoma cruzi (strain CL Brener) GN=Tc00.1047053506925.319 PE=3 SV=1	1	EELIFPFLDVPIEYYDLGM(1)ENR
25.6467	25.8781	2	25.1811		1	5.25322e+07	6.16715e+07	5.71019e+07	3.80423e+07		3.80423e+07	0.666218	-0.585934	M	3	1	292	tr|Q4D9S6|Q4D9S6_TRYCC	292	tr|Q4D9S6|Q4D9S6_TRYCC	>tr|Q4D9S6|Q4D9S6_TRYCC Urocanate hydratase, putative OS=Trypanosoma cruzi (strain CL Brener) GN=Tc00.1047053504045.110 PE=3 SV=1	1	KGQGWLM(1)EVETDVEALLR
24.9272	25.584	2		25.1653	1	3.19032e+07	5.02981e+07	4.11007e+07		3.76279e+07	3.76279e+07	0.915506	-0.127358	M	3	1	259	tr|Q4CN99|Q4CN99_TRYCC	259	tr|Q4CN99|Q4CN99_TRYCC	>tr|Q4CN99|Q4CN99_TRYCC Uncharacterized protein (Fragment) OS=Trypanosoma cruzi (strain CL Brener) GN=Tc00.1047053510653.10 PE=4 SV=1	1	RQHGAEPLEVLQGCLQAQVM(1)SLHGR
26.8894	26.2732	2		25.8301	1	1.24313e+08	8.11001e+07	1.02706e+08		5.96534e+07	5.96534e+07	0.580814	-0.783852	M	2	1	1321	tr|Q4DQI1|Q4DQI1_TRYCC	1321	tr|Q4DQI1|Q4DQI1_TRYCC	>tr|Q4DQI1|Q4DQI1_TRYCC Uncharacterized protein OS=Trypanosoma cruzi (strain CL Brener) GN=Tc00.1047053505807.90 PE=4 SV=1	1	LSENDTVTEVSLPRNAVM(1)HAR
26.0936	26.0367	2		23.991	1	7.16071e+07	6.88379e+07	7.02225e+07		1.66729e+07	1.66729e+07	0.237429	-2.07443	M	3	1	1	tr|Q4DL44|Q4DL44_TRYCC	1	tr|Q4DL44|Q4DL44_TRYCC	>tr|Q4DL44|Q4DL44_TRYCC Uncharacterized protein OS=Trypanosoma cruzi (strain CL Brener) GN=Tc00.1047053503893.40 PE=4 SV=1	1	M(1)AQQGGNIRRGSSR
25.0164	24.8565	2		25.7925	1	3.3938e+07	3.03775e+07	3.21578e+07		5.81187e+07	5.81187e+07	1.8073	0.853836	M	2	1	1	tr|Q4CSJ3|Q4CSJ3_TRYCC;tr|Q4CNE4|Q4CNE4_TRYCC	1;1	tr|Q4CSJ3|Q4CSJ3_TRYCC	>tr|Q4CSJ3|Q4CSJ3_TRYCC Dispersed gene family protein 1 (DGF-1), putative (Fragment) OS=Trypanosoma cruzi (strain CL Brener) GN=Tc00.1047053511125.9 PE=4 SV=1;>tr|Q4CNE4|Q4CNE4_TRYCC Dispersed gene family protein 1 (DGF-1), putative (Fragment) OS=Trypanoso	1	M(1)WSAVGACLRSR
26.1661	26.3902	2		25.0015	1	7.52976e+07	8.79512e+07	81624388		3.35893e+07	3.35893e+07	0.411511	-1.281	M	2	0.998988	1	tr|Q4DCX0|Q4DCX0_TRYCC	1	tr|Q4DCX0|Q4DCX0_TRYCC	>tr|Q4DCX0|Q4DCX0_TRYCC Uncharacterized protein OS=Trypanosoma cruzi (strain CL Brener) GN=Tc00.1047053506791.60 PE=4 SV=1	1	M(0.999)SAGKGGEEM(0.001)RESPAGK
25.2719	23.6825	2	23.261		1	4.05135e+07	1.3463e+07	2.69883e+07	1.00521e+07		1.00521e+07	0.372463	-1.42483	M	2	1	1	tr|Q4E4C6|Q4E4C6_TRYCC	1	tr|Q4E4C6|Q4E4C6_TRYCC	>tr|Q4E4C6|Q4E4C6_TRYCC Uncharacterized protein OS=Trypanosoma cruzi (strain CL Brener) GN=Tc00.1047053510187.250 PE=4 SV=1	1	M(1)EDGEALDLQDALKPEVK
27.0117	27.4067	2	25.3313		1	1.35311e+08	1.77926e+08	1.56618e+08	4.22164e+07		4.22164e+07	0.26955	-1.89138	M	2	0.98984	329	tr|Q4DAT6|Q4DAT6_TRYCC;tr|Q4DWS5|Q4DWS5_TRYCC	409;329	tr|Q4DWS5|Q4DWS5_TRYCC	>tr|Q4DAT6|Q4DAT6_TRYCC Hsc70-interacting protein (Hip), putative OS=Trypanosoma cruzi (strain CL Brener) GN=Tc00.1047053510143.24 PE=4 SV=1;>tr|Q4DWS5|Q4DWS5_TRYCC Hsc70-interacting protein, putative OS=Trypanosoma cruzi (strain CL Brener) GN=Tc00.1047053	2	SNPM(0.02)AALQM(0.99)M(0.99)GDPKVGPLIQK
27.0117	27.4067	2	25.3313		1	1.35311e+08	1.77926e+08	1.56618e+08	4.22164e+07		4.22164e+07	0.26955	-1.89138	M	2	0.999781	330	tr|Q4DAT6|Q4DAT6_TRYCC;tr|Q4DWS5|Q4DWS5_TRYCC	410;330	tr|Q4DWS5|Q4DWS5_TRYCC	>tr|Q4DAT6|Q4DAT6_TRYCC Hsc70-interacting protein (Hip), putative OS=Trypanosoma cruzi (strain CL Brener) GN=Tc00.1047053510143.24 PE=4 SV=1;>tr|Q4DWS5|Q4DWS5_TRYCC Hsc70-interacting protein, putative OS=Trypanosoma cruzi (strain CL Brener) GN=Tc00.1047053	2	SNPM(0.157)AALQM(0.843)M(1)GDPK
27.3062	27.158	2	24.5045		1	1.65953e+08	1.49752e+08	157852529	2.38007e+07		2.38007e+07	0.150778	-2.7295	M	2	1	115	tr|Q4CT32|Q4CT32_TRYCC	115	tr|Q4CT32|Q4CT32_TRYCC	>tr|Q4CT32|Q4CT32_TRYCC Surface protease GP63, putative (Fragment) OS=Trypanosoma cruzi (strain CL Brener) GN=Tc00.1047053504575.60 PE=4 SV=1	2	IM(1)VNRM(1)LPEAVK
27.1038	25.6819	2	23.2013		1	1.4423e+08	5.38297e+07	9.90301e+07	9.64467e+06		9.64467e+06	0.0973913	-3.36006	M	3	1	57	tr|Q4DRS9|Q4DRS9_TRYCC;tr|Q4DEH8|Q4DEH8_TRYCC	57;57	tr|Q4DRS9|Q4DRS9_TRYCC	>tr|Q4DRS9|Q4DRS9_TRYCC DNA primase large subunit OS=Trypanosoma cruzi (strain CL Brener) GN=Tc00.1047053510943.140 PE=3 SV=1;>tr|Q4DEH8|Q4DEH8_TRYCC DNA primase large subunit OS=Trypanosoma cruzi (strain CL Brener) GN=Tc00.1047053504867.80 PE=3 SV=1	2	M(1)ELLAWIDQLM(1)NSPNVR
25.3163	24.6259	2			0	4.17797e+07	2.58902e+07	3.38349e+07						M	3	1	176	tr|Q4CXB4|Q4CXB4_TRYCC	176	tr|Q4CXB4|Q4CXB4_TRYCC	>tr|Q4CXB4|Q4CXB4_TRYCC ATPase alpha subunit, putative (Fragment) OS=Trypanosoma cruzi (strain CL Brener) GN=Tc00.1047053503617.40 PE=4 SV=1	1	FFTLNSPVLHDELEEM(1)LK
24.4072	26.184	2			0	2.22484e+07	7.62376e+07	4.9243e+07						M	2	0.999913	30	tr|Q4DNQ7|Q4DNQ7_TRYCC;tr|Q4D455|Q4D455_TRYCC	30;30	tr|Q4DNQ7|Q4DNQ7_TRYCC	>tr|Q4DNQ7|Q4DNQ7_TRYCC Adenosylhomocysteinase OS=Trypanosoma cruzi (strain CL Brener) GN=Tc00.1047053511589.200 PE=3 SV=1;>tr|Q4D455|Q4D455_TRYCC Adenosylhomocysteinase OS=Trypanosoma cruzi (strain CL Brener) GN=Tc00.1047053511229.50 PE=3 SV=1	1	AIEIAENEMPGLM(1)ELR
24.906	25.6964	2			0	3.14379e+07	5.43735e+07	4.29057e+07						M	2	1	604	tr|Q4E0Q0|Q4E0Q0_TRYCC;tr|Q4E3P5|Q4E3P5_TRYCC	604;604	tr|Q4E3P5|Q4E3P5_TRYCC	>tr|Q4E0Q0|Q4E0Q0_TRYCC Pyruvate, phosphate dikinase OS=Trypanosoma cruzi (strain CL Brener) GN=Tc00.1047053506297.190 PE=3 SV=1;>tr|Q4E3P5|Q4E3P5_TRYCC Pyruvate, phosphate dikinase OS=Trypanosoma cruzi (strain CL Brener) GN=Tc00.1047053510101.140 PE=3 SV=	1	EM(1)ILADTLEGR
25.1092	23.3084	2			0	3.61928e+07	1.03879e+07	2.32904e+07						M	3	1	361	tr|Q4CXW2|Q4CXW2_TRYCC	361	tr|Q4CXW2|Q4CXW2_TRYCC	>tr|Q4CXW2|Q4CXW2_TRYCC Elongation factor 1-gamma (EF-1-gamma), putative OS=Trypanosoma cruzi (strain CL Brener) GN=Tc00.1047053510163.20 PE=4 SV=1	1	GM(1)PAIVEDVEDTELFDWEEVADVAAQR
27.2491	26.8339	2			0	1.59513e+08	1.19621e+08	1.39567e+08						M	2	1	1353	tr|Q4CLF8|Q4CLF8_TRYCC;tr|Q4CPQ6|Q4CPQ6_TRYCC;tr|Q4CS87|Q4CS87_TRYCC	618;1353;20	tr|Q4CPQ6|Q4CPQ6_TRYCC	>tr|Q4CLF8|Q4CLF8_TRYCC Calpain-like cysteine peptidase, putative (Fragment) OS=Trypanosoma cruzi (strain CL Brener) GN=Tc00.1047053484311.10 PE=4 SV=1;>tr|Q4CPQ6|Q4CPQ6_TRYCC Calpain cysteine peptidase, putative (Fragment) OS=Trypanosoma cruzi (strain CL	1	EIAALEESM(1)NAR
24.447	24.9228	2			0	2.28707e+07	3.18061e+07	2.73384e+07						M	3	1	253	tr|Q4D4G9|Q4D4G9_TRYCC;tr|Q4DTD8|Q4DTD8_TRYCC	253;253	tr|Q4DTD8|Q4DTD8_TRYCC	>tr|Q4D4G9|Q4D4G9_TRYCC Heat shock protein-like protein, putative OS=Trypanosoma cruzi (strain CL Brener) GN=Tc00.1047053508443.20 PE=4 SV=1;>tr|Q4DTD8|Q4DTD8_TRYCC Heat shock protein-like protein, putative OS=Trypanosoma cruzi (strain CL Brener) GN=Tc00.1	1	TM(1)EGVDITVLIDEIVHPK
26.5926	26.8089	2			0	1.01198e+08	1.17566e+08	1.09382e+08						M	3	1	312	tr|Q4DNV7|Q4DNV7_TRYCC;tr|Q4DNV8|Q4DNV8_TRYCC	396;312	tr|Q4DNV8|Q4DNV8_TRYCC	>tr|Q4DNV7|Q4DNV7_TRYCC Phosphoglycerate kinase OS=Trypanosoma cruzi (strain CL Brener) GN=Tc00.1047053505999.100 PE=3 SV=1;>tr|Q4DNV8|Q4DNV8_TRYCC Phosphoglycerate kinase OS=Trypanosoma cruzi (strain CL Brener) GN=Tc00.1047053505999.90 PE=3 SV=1	1	AVEAPLVTEGVDIPDGHM(1)ALDIGPR
24.332	24.5698	2			0	2.11184e+07	2.49027e+07	2.30106e+07						M	3	1	1	tr|Q4DST0|Q4DST0_TRYCC	1	tr|Q4DST0|Q4DST0_TRYCC	>tr|Q4DST0|Q4DST0_TRYCC Protein kinase, putative (Fragment) OS=Trypanosoma cruzi (strain CL Brener) GN=Tc00.1047053507809.14 PE=4 SV=1	1	M(1)LTSSIHNINNIIISPCR
24.8148	25.2444	2			0	2.9512e+07	3.97486e+07	3.46303e+07						M	2	1	25	tr|Q4DU93|Q4DU93_TRYCC;tr|Q4D0X4|Q4D0X4_TRYCC	25;79	tr|Q4DU93|Q4DU93_TRYCC	>tr|Q4DU93|Q4DU93_TRYCC Uncharacterized protein OS=Trypanosoma cruzi (strain CL Brener) GN=Tc00.1047053507011.260 PE=4 SV=1;>tr|Q4D0X4|Q4D0X4_TRYCC Uncharacterized protein OS=Trypanosoma cruzi (strain CL Brener) GN=Tc00.1047053510663.80 PE=4 SV=1	1	NSPIQGEM(1)QQKR
24.0213	26.0573	2			0	1.70268e+07	6.98279e+07	4.34273e+07						M	3	1	11	tr|Q4DHS1|Q4DHS1_TRYCC	11	tr|Q4DHS1|Q4DHS1_TRYCC	>tr|Q4DHS1|Q4DHS1_TRYCC Gamma-glutamylcysteine synthetase, putative OS=Trypanosoma cruzi (strain CL Brener) GN=Tc00.1047053507787.100 PE=4 SV=1	1	GLLTTGGKPM(1)R
21.1202	21.3674	2			0	2.27936e+06	2.70538e+06	2.49237e+06						M	2	1	86	tr|Q4D488|Q4D488_TRYCC;tr|Q4DT61|Q4DT61_TRYCC	86;86	tr|Q4DT61|Q4DT61_TRYCC	>tr|Q4D488|Q4D488_TRYCC RNA-binding protein, putative OS=Trypanosoma cruzi (strain CL Brener) GN=Tc00.1047053509317.60 PE=4 SV=1;>tr|Q4DT61|Q4DT61_TRYCC RNA-binding protein, putative OS=Trypanosoma cruzi (strain CL Brener) GN=Tc00.1047053511621.50 PE=4 SV=	1	SDNNM(1)DDNQK
23.2144	23.8951	2			0	9.73264e+06	1.56006e+07	1.26666e+07						M	3	1	267	tr|Q4D5M2|Q4D5M2_TRYCC;tr|Q4DTV5|Q4DTV5_TRYCC	267;267	tr|Q4D5M2|Q4D5M2_TRYCC	>tr|Q4D5M2|Q4D5M2_TRYCC RuvB-like helicase OS=Trypanosoma cruzi (strain CL Brener) GN=Tc00.1047053505989.82 PE=3 SV=1;>tr|Q4DTV5|Q4DTV5_TRYCC RuvB-like helicase OS=Trypanosoma cruzi (strain CL Brener) GN=Tc00.1047053508693.80 PE=3 SV=1	1	PNQGQDALSIVNSLM(1)KQK
25.8322	26.3754	2			0	5.97403e+07	8.70536e+07	7.33969e+07						M	2	1	57	tr|Q4E2X8|Q4E2X8_TRYCC;tr|Q4DI52|Q4DI52_TRYCC	57;57	tr|Q4E2X8|Q4E2X8_TRYCC	>tr|Q4E2X8|Q4E2X8_TRYCC Uncharacterized protein OS=Trypanosoma cruzi (strain CL Brener) GN=Tc00.1047053508175.180 PE=4 SV=1;>tr|Q4DI52|Q4DI52_TRYCC Uncharacterized protein OS=Trypanosoma cruzi (strain CL Brener) GN=Tc00.1047053509151.110 PE=4 SV=1	1	QQM(1)QQLQRPSSGAKK
